# Supplementary material for: DNA variation and brain region-specific expression profiles exhibit different relationships between inbred mouse strains: implications for eQTL mapping studies
Source: PubMed Central journal article supplement (PMC1852412; doi:10.1186/gb-2007-8-2-r25), 2007-02-26
Supplement: gb-2007-8-2-r25-S2.pdf [file gb-2007-8-2-r25-S2.pdf]

| p-value threshold | # of probe sets with no putative polymorphisms |         |                  |                 |         |                  |
|-------------------|------------------------------------------------|---------|------------------|-----------------|---------|------------------|
|                   | strain specific                                |         |                  | region specific |         |                  |
|                   | # cis                                          | # total | % cis enrichment | # cis           | # total | % cis enrichment |
| 0.01              | 206                                            | 338     | 61%              | 347             | 3621    | 10%              |
| 0.001             | 529                                            | 870     | 61%              | 1081            | 10912   | 10%              |
| 0.0001            | 682                                            | 1189    | 57%              | 1472            | 14832   | 10%              |
| 0.00001           | 758                                            | 1392    | 54%              | 1640            | 16296   | 10%              |
| 1E-6              | 820                                            | 1548    | 53%              | 1703            | 16902   | 10%              |
| 1E-7              | 853                                            | 1662    | 51%              | 1747            | 17299   | 10%              |
| 1E-8              | 886                                            | 1738    | 51%              | 1786            | 17611   | 10%              |
| 1E-9              | 918                                            | 1834    | 50%              | 1808            | 17839   | 10%              |

**Additional data file 2.** Enrichment of probe sets with genetic cis-association at various p-value thresholds after ignoring probe sets harboring putative polymorphisms. Probe set signal values were scaled to take into account varying levels of gene expression. Then the hybridization pattern at each probe pair within the probe set was tested using a t-test between the strains to identify likely sequence variants. Probe sets determined to harbor a hybridization difference at any one of their probe pairs based on various p-value thresholds were eliminated from the analysis since they were deemed to harbor potential sequence variation that could affect probe hybridization and lead to false eQTL associations. The table shows the number of strain-specific or region-specific probe sets that still show cis-association after eliminating those probe sets with putative polymorphisms under the probe sequences at different p-value thresholds.
