# Supplementary material for: DNA variation and brain region-specific expression profiles exhibit different relationships between inbred mouse strains: implications for eQTL mapping studies
Source: PubMed Central journal article supplement (PMC1852412; doi:10.1186/gb-2007-8-2-r25), 2007-02-26
Supplement: gb-2007-8-2-r25-S4.pdf [file gb-2007-8-2-r25-S4.pdf]

**Additional data file 4.** SNP positions from NCBI Build 34 and genotypes of the mouse strains used in this study.

| SNP_ID | rsSNP       | Chr | Pos       | 129S1/SvImJ | A/J | C3H/HeJ | C57BL/6J | DBA/2J | FVB/NJ |
|--------|-------------|-----|-----------|-------------|-----|---------|----------|--------|--------|
| 1      | rs6396997   | 6   | 58100664  | G           | G   | G       | G        | G      | G      |
| 2      | rs3164478   | 1   | 133269119 | G           | A   | A       | A        | G      | G      |
| 3      | rs6357429   | 1   | 3007431   | G           | G   | G       | G        | G      | G      |
| 4      | rs3683945   | 1   | 3201415   | A           | A   | G       | A        | A      | A      |
| 5      | rs3707673   | 1   | 3410201   | G           | G   | A       | G        | G      | G      |
| 6      | rs6269442   | 1   | 3495168   | G           | A   | G       | A        | G      | G      |
| 7      | rs2228910   | 1   | 3555923   | C           | C   | C       | C        | C      | C      |
| 8      | rs6336442   | 1   | 3583692   | A           | A   | G       | A        | G      | A      |
| 9      | rs4140116   | 1   | 3584226   | G           | G   | G       | G        | G      | G      |
| 10     | rs6243160   | 1   | 4171743   | A           | A   | A       | A        | G      | A      |
| 11     | rs6198069   | 1   | 4731989   | G           | A   | G       | G        | G      | G      |
| 12     | rs3659303   | 1   | 4778495   | A           | A   | G       | A        | G      | A      |
| 13     | rs4230167   | 1   | 4782615   | G           | G   | G       | G        | C      | G      |
| 14     | rs3674785   | 1   | 4873527   | G           | G   | A       | G        | G      | G      |
| 15     | rs6376963   | 1   | 5030491   | C           | C   | C       | C        | A      | C      |
| 16     | rs3677817   | 1   | 5197303   | G           | G   | A       | A        | G      | G      |
| 17     | mCV23863067 | 1   | 8408319   | C           | C   | G       | G        | G      | C      |
| 18     | rs8236463   | 1   | 5600331   | T           | T   | T       | T        | A      | T      |
| 19     | rs8236467   | 1   | 5614153   | G           | G   | G       | G        | G      | G      |
| 20     | rs8236468   | 1   | 5614198   | A           | A   | A       | A        | A      | A      |
| 21     | rs3710263   | 1   | 6071196   | G           | A   | G       | G        | A      | A      |
| 22     | rs6333200   | 1   | 6242057   | A           | G   | G       | A        | G      | G      |
| 23     | rs6298633   | 1   | 6845155   | A           | A   | G       | A        | G      | A      |
| 24     | rs3667401   | 1   | 7167592   | A           | G   | G       | G        | G      | G      |
| 25     | mCV24839713 | 1   | 10578928  | G           | A   | G       | G        | G      | G      |
| 26     | rs6321307   | 1   | 7691737   | A           | A   | C       | A        | A      | A      |
| 27     | rs3707314   | 1   | 7701608   | A           | A   | C       | C        | C      | A      |
| 28     | rs3717997   | 1   | 7879984   | A           | A   | G       | G        | G      | A      |
| 29     | rs3684358   | 1   | 8111551   | A           | A   | C       | C        | C      | A      |
| 30     | rs3679592   | 1   | 8542265   | A           | A   | A       | G        | A      | A      |
| 31     | rs3716083   | 1   | 9092463   | A           | G   | A       | G        | A      | G      |
| 32     | rs6382958   | 1   | 9228418   | G           | G   | G       | G        | G      | G      |
| 33     | rs3665459   | 1   | 9328928   | G           | G   | G       | A        | A      | G      |
| 34     | rs6195532   | 1   | 9696644   | A           | A   | A       | A        | G      | A      |
| 35     | rs3667692   | 1   | 9786644   | G           | G   | G       | A        | G      | G      |
| 36     | rs3680898   | 1   | 9871859   | C           | C   | G       | G        | G      | C      |
| 37     | rs3703103   | 1   | 10010177  | A           | A   | A       | T        | A      | A      |
| 38     | rs3698285   | 1   | 10098141  | A           | A   | A       | G        | G      | A      |
| 39     | rs3678510   | 1   | 10752289  | G           | G   | A       | A        | A      | G      |
| 40     | rs3697012   | 1   | 10980605  | T           | T   | A       | T        | T      | T      |
| 41     | mCV24107897 | 1   | 14297381  | C           | G   | G       | G        | G      | G      |
| 42     | rs6360236   | 1   | 11163199  | C           | C   | A       | A        | C      | C      |
| 43     | rs6372808   | 1   | 11203312  | C           | C   | C       | C        | C      | C      |
| 44     | rs3722996   | 1   | 11348581  | A           | A   | C       | A        | C      | A      |
| 45     | rs3724763   | 1   | 11348812  | A           | A   | G       | A        | G      | A      |
| 46     | rs4222149   | 1   | 11480996  | A           | A   | G       | A        | G      | A      |
| 47     | rs3687812   | 1   | 11544080  | A           | A   | C       | A        | A      | A      |
| 48     | rs6228313   | 1   | 11975086  | A           | G   | G       | G        | A      | G      |
| 49     | rs3715450   | 1   | 12006929  | T           | T   | A       | A        | T      | T      |
| 50     | rs3681537   | 1   | 12027164  | C           | C   | A       | A        | C      | C      |
| 51     | rs2020774   | 1   | 12431293  | C           | C   | C       | C        | C      | C      |
| 52     | rs3726952   | 1   | 12906283  | G           | G   | G       | A        | A      | G      |
| 53     | rs3654377   | 1   | 13330054  | A           | A   | A       | G        | G      | A      |
| 54     | rs3655978   | 1   | 13486779  | G           | G   | G       | A        | G      | G      |
| 55     | rs3670630   | 1   | 13638736  | C           | C   | C       | A        | C      | C      |
| 56     | rs3675633   | 1   | 13740462  | C           | A   | A       | C        | A      | A      |
| 57     | rs3654866   | 1   | 13815557  | G           | G   | G       | A        | G      | G      |
| 58     | rs3669485   | 1   | 14102655  | A           | A   | A       | G        | A      | A      |
| 59     | rs3088721   | 1   | 14166456  | T           | T   | T       | T        | T      | T      |
| 60     | rs8253369   | 1   | 14385276  | C           | C   | C       | C        | C      | C      |
| 61     | rs8253368   | 1   | 14385715  | C           | C   | C       | C        | C      | C      |
| 62     | rs8253364   | 1   | 14386024  | A           | A   | A       | A        | A      | A      |
| 63     | rs3713198   | 1   | 14629358  | C           | C   | C       | G        | C      | C      |
| 64     | rs3723784   | 1   | 14838567  | G           | G   | G       | A        | A      | G      |
| 65     | rs3664075   | 1   | 14878509  | A           | A   | A       | G        | G      | A      |
| 66     | rs6291839   | 1   | 14957062  | A           | G   | G       | G        | A      | G      |
| 67     | rs3088964   | 1   | 15365996  | C           | C   | C       | C        | A      | C      |
| 68     | rs3708560   | 1   | 15552631  | A           | G   | G       | G        | G      | G      |
| 69     | rs3678179   | 1   | 15668758  | A           | A   | A       | T        | A      | A      |
| 70     | rs3669513   | 1   | 15720686  | A           | A   | A       | C        | A      | A      |
| 71     | rs6201380   | 1   | 15973423  | G           | A   | A       | A        | G      | A      |

|     |             |   |          |   |   |   |   |   |   |
|-----|-------------|---|----------|---|---|---|---|---|---|
| 72  | rs6278832   | 1 | 16392616 | G | G | G | G | G | G |
| 73  | rs6279455   | 1 | 16392813 | A | A | A | A | A | A |
| 74  | rs3671256   | 1 | 16443156 | T | T | T | A | T | T |
| 75  | rs3706411   | 1 | 16448089 | A | A | A | T | T | A |
| 76  | rs6389205   | 1 | 16598344 | A | T | T | A | A | T |
| 77  | rs6199072   | 1 | 17368383 | A | A | A | A | A | A |
| 78  | rs3675398   | 1 | 17751670 | G | A | A | A | A | A |
| 79  | rs6270008   | 1 | 17929623 | G | A | A | A | A | A |
| 80  | rs6398620   | 1 | 18560717 | A | T | T | T | T | T |
| 81  | rs3656562   | 1 | 18692924 | G | A | A | A | A | A |
| 82  | mCV23695025 | 1 | 22386585 | G | G | G | A | G | G |
| 83  | rs4222153   | 1 | 19445316 | A | A | A | A | A | A |
| 84  | rs3658044   | 1 | 19498836 | T | A | A | T | T | A |
| 85  | rs4222165   | 1 | 19540757 | A | A | A | A | A | A |
| 86  | rs3718050   | 1 | 19900658 | A | A | A | C | C | A |
| 87  | rs6336494   | 1 | 19965523 | G | G | G | A | A | G |
| 88  | rs3720411   | 1 | 20266680 | A | G | G | A | A | G |
| 89  | rs6334092   | 1 | 20368047 | C | A | A | C | C | A |
| 90  | rs3687041   | 1 | 20634051 | G | A | A | G | G | A |
| 91  | rs3670611   | 1 | 20841621 | A | A | A | G | A | A |
| 92  | rs6404446   | 1 | 20994482 | A | A | A | C | A | A |
| 93  | rs3662305   | 1 | 21144565 | G | G | G | A | G | G |
| 94  | rs3088778   | 1 | 21223535 | A | A | A | G | A | A |
| 95  | rs3704179   | 1 | 21253854 | A | G | G | A | G | G |
| 96  | mCV24781171 | 1 | 24680601 | A | G | G | A | G | G |
| 97  | rs8243843   | 1 | 21452574 | A | A | A | A | A | A |
| 98  | rs8243886   | 1 | 21468418 | A | A | A | A | A | A |
| 99  | rs6253968   | 1 | 21852704 | G | G | G | A | G | G |
| 100 | mCV24784983 | 1 | 25471405 | A | C | C | A | C | C |
| 101 | rs3711079   | 1 | 22156681 | A | A | A | G | A | A |
| 102 | rs3682202   | 1 | 22168773 | G | G | G | A | G | G |
| 103 | rs3089410   | 1 | 22181163 | A | A | A | A | A | A |
| 104 | rs3708897   | 1 | 22578801 | G | A | A | A | A | A |
| 105 | rs3672208   | 1 | 22921227 | G | A | A | G | A | A |
| 106 | rs6173215   | 1 | 22977896 | A | G | G | A | G | G |
| 107 | rs3691092   | 1 | 23017895 | G | A | A | G | A | A |
| 108 | rs3090015   | 1 | 23088053 | A | A | A | A | A | A |
| 109 | rs3659806   | 1 | 23400609 | A | C | C | A | C | C |
| 110 | rs6351482   | 1 | 23424241 | C | G | G | C | G | G |
| 111 | rs3695916   | 1 | 23514086 | G | A | A | G | A | A |
| 112 | rs3682782   | 1 | 23897617 | G | G | G | G | G | G |
| 113 | mCV22980985 | 1 | 27363304 | T | A | A | T | A | A |
| 114 | rs4222215   | 1 | 24234159 | A | G | G | A | G | G |
| 115 | rs4222217   | 1 | 24234275 | G | C | C | G | C | C |
| 116 | rs4222220   | 1 | 24234447 | A | A | A | A | A | A |
| 117 | rs6231303   | 1 | 24426016 | A | A | A | A | A | A |
| 118 | mCV25266528 | 1 | 28043045 | C | A | A | C | A | A |
| 119 | rs4222227   | 1 | 25005587 | A | A | A | A | A | A |
| 120 | rs4222228   | 1 | 25005693 | A | A | A | A | A | A |
| 121 | rs6342281   | 1 | 25022769 | A | A | A | A | A | A |
| 122 | rs3711129   | 1 | 25607261 | A | A | A | G | A | A |
| 123 | rs3657464   | 1 | 25686911 | G | G | G | A | G | G |
| 124 | rs6166266   | 1 | 26136349 | A | C | C | A | C | C |
| 125 | rs3673503   | 1 | 26267798 | A | A | A | C | A | A |
| 126 | rs3686971   | 1 | 26426004 | A | G | G | G | G | G |
| 127 | rs6380710   | 1 | 26459079 | A | C | C | C | C | C |
| 128 | rs3709207   | 1 | 26590966 | A | C | C | A | C | C |
| 129 | rs3690896   | 1 | 26999255 | A | A | A | A | A | A |
| 130 | rs3660438   | 1 | 27267888 | A | A | A | G | A | A |
| 131 | rs3677683   | 1 | 27510356 | G | G | G | A | G | G |
| 132 | rs3692609   | 1 | 27510406 | C | C | C | A | C | C |
| 133 | rs6218992   | 1 | 27526370 | A | A | A | T | A | A |
| 134 | rs6192641   | 1 | 28145674 | G | A | A | G | A | A |
| 135 | rs3666231   | 1 | 28664680 | A | G | G | G | G | G |
| 136 | rs3711203   | 1 | 28973206 | A | A | A | G | A | A |
| 137 | rs3713281   | 1 | 29201052 | A | A | A | C | A | A |
| 138 | rs6384194   | 1 | 29421983 | A | A | A | G | A | A |
| 139 | rs3719194   | 1 | 29770616 | C | C | C | A | C | C |
| 140 | rs3660938   | 1 | 29770817 | A | A | A | G | A | A |
| 141 | rs6288570   | 1 | 29898295 | A | A | A | A | A | A |
| 142 | rs6168330   | 1 | 29987616 | A | G | G | A | G | G |
| 143 | rs3695988   | 1 | 29990732 | C | C | C | A | C | C |
| 144 | rs3653504   | 1 | 30103194 | A | A | A | C | A | A |
| 145 | rs3722689   | 1 | 30237048 | G | G | G | A | G | G |

|     |             |   |          |   |   |   |   |   |   |
|-----|-------------|---|----------|---|---|---|---|---|---|
| 146 | rs3722005   | 1 | 30710165 | G | A | A | A | A | A |
| 147 | rs6237824   | 1 | 30982111 | C | C | C | A | C | C |
| 148 | rs4137502   | 1 | 31102378 | G | A | A | G | A | A |
| 149 | rs6329963   | 1 | 31193026 | A | G | G | A | G | G |
| 150 | rs3676270   | 1 | 31435680 | G | A | A | A | A | A |
| 151 | rs3724031   | 1 | 31440272 | C | A | A | A | A | A |
| 152 | rs6209502   | 1 | 31728284 | T | T | T | T | T | T |
| 153 | rs3712692   | 1 | 32012045 | C | C | C | C | C | C |
| 154 | rs3678653   | 1 | 32094986 | A | G | G | G | G | G |
| 155 | rs3655881   | 1 | 32740123 | G | G | G | A | A | G |
| 156 | rs6321337   | 1 | 32742292 | A | A | A | G | G | A |
| 157 | rs3707642   | 1 | 32799125 | A | A | A | C | A | A |
| 158 | rs3088844   | 1 | 32986387 | A | A | A | A | C | A |
| 159 | rs3703203   | 1 | 33280447 | A | C | C | C | A | C |
| 160 | rs3664658   | 1 | 33465930 | A | A | A | A | G | A |
| 161 | rs3690508   | 1 | 33532109 | A | C | C | A | C | C |
| 162 | rs3725230   | 1 | 33616011 | A | G | G | A | G | G |
| 163 | mCV23749183 | 1 | 37637629 | A | G | G | A | G | A |
| 164 | rs6379161   | 1 | 33819378 | A | G | G | G | G | G |
| 165 | rs6176536   | 1 | 34313457 | G | C | C | G | G | C |
| 166 | rs3681732   | 1 | 34414162 | G | G | G | A | A | G |
| 167 | rs3709457   | 1 | 34457593 | A | G | G | A | A | G |
| 168 | rs6282096   | 1 | 34523471 | A | T | T | T | T | T |
| 169 | rs4222252   | 1 | 34728973 | G | G | G | G | G | G |
| 170 | mCV25004024 | 1 | 38715755 | T | T | T | T | A | A |
| 171 | rs4222264   | 1 | 34830256 | A | A | A | A | A | A |
| 172 | rs6251423   | 1 | 35047722 | G | A | A | G | A | A |
| 173 | rs6279250   | 1 | 35094165 | G | G | G | C | G | G |
| 174 | rs3657255   | 1 | 35323998 | A | A | A | G | G | A |
| 175 | rs3687379   | 1 | 35737360 | C | G | G | C | C | G |
| 176 | rs6401503   | 1 | 35862251 | C | C | C | C | A | C |
| 177 | rs3022778   | 1 | 36009624 | C | C | C | C | C | C |
| 178 | mCV23414826 | 1 | 40111128 | A | A | A | C | C | A |
| 179 | rs3683997   | 1 | 36198091 | G | A | A | G | G | A |
| 180 | rs3684440   | 1 | 36480288 | A | G | G | A | G | A |
| 181 | mCV24644372 | 1 | 40449019 | A | G | G | A | A | A |
| 182 | mCV24153753 | 1 | 41423174 | A | C | C | C | A | A |
| 183 | rs6255606   | 1 | 37662659 | A | G | G | A | G | A |
| 184 | rs4222275   | 1 | 37732620 | A | C | C | A | C | A |
| 185 | rs3692113   | 1 | 37808998 | A | A | A | G | A | A |
| 186 | rs6164278   | 1 | 38757090 | A | A | A | A | G | A |
| 187 | rs3706514   | 1 | 38820158 | A | A | A | T | A | A |
| 188 | rs3707984   | 1 | 38829792 | A | A | A | G | A | A |
| 189 | rs3685569   | 1 | 38871455 | A | A | A | G | A | A |
| 190 | rs4222292   | 1 | 39687384 | G | G | G | G | G | G |
| 191 | rs4222297   | 1 | 39320282 | A | G | G | A | G | G |
| 192 | rs6387241   | 1 | 39621383 | G | A | A | G | G | G |
| 193 | rs6366151   | 1 | 39653238 | C | C | C | G | G | G |
| 194 | rs3665127   | 1 | 39735558 | A | G | G | A | A | A |
| 195 | mCV25154866 | 1 | 43374960 | A | G | G | G | G | G |
| 196 | rs3680400   | 1 | 40179424 | A | A | A | G | G | G |
| 197 | rs6385050   | 1 | 40215549 | G | G | G | G | G | G |
| 198 | rs3090550   | 1 | 40639069 | G | G | G | G | G | G |
| 199 | rs4222303   | 1 | 40691309 | A | A | A | A | A | A |
| 200 | rs6247051   | 1 | 40764710 | A | A | A | A | A | A |
| 201 | rs8237691   | 1 | 40765736 | A | A | A | A | A | A |
| 202 | rs3677272   | 1 | 40907247 | G | G | G | A | A | G |
| 203 | rs3708475   | 1 | 41013071 | A | C | C | A | A | A |
| 204 | rs3723444   | 1 | 41013127 | G | C | C | G | G | G |
| 205 | rs3696088   | 1 | 41156578 | C | G | G | C | C | C |
| 206 | rs4222307   | 1 | 41184728 | G | G | G | G | G | G |
| 207 | rs3706173   | 1 | 41800892 | G | A | A | G | G | G |
| 208 | rs3089696   | 1 | 41804355 | G | G | G | G | G | G |
| 209 | rs3671534   | 1 | 41942580 | A | C | C | C | A | A |
| 210 | rs6262666   | 1 | 41976768 | G | A | A | G | G | G |
| 211 | rs3667075   | 1 | 42249198 | G | A | A | G | G | G |
| 212 | rs3663706   | 1 | 42337818 | A | A | A | G | G | G |
| 213 | rs3661842   | 1 | 42344022 | T | T | T | A | A | A |
| 214 | rs6269695   | 1 | 42402297 | A | A | A | A | A | A |
| 215 | mCV23249065 | 1 | 45942199 | C | C | C | A | C | C |
| 216 | rs3675140   | 1 | 42818754 | A | A | A | G | G | A |
| 217 | rs3715199   | 1 | 42975729 | A | C | C | C | C | C |
| 218 | rs6208403   | 1 | 43106815 | G | G | G | G | G | G |
| 219 | rs4222315   | 1 | 43444336 | G | G | G | G | G | G |

|     |             |   |          |      |   |   |   |     |   |
|-----|-------------|---|----------|------|---|---|---|-----|---|
| 220 | mCV23614325 | 1 | 43902930 | A    | A | A | C | A   | A |
| 221 | rs3662842   | 1 | 43777889 | G    | G | G | A | G   | A |
| 222 | rs6187198   | 1 | 43783321 | G    | G | G | G | G   | G |
| 223 | rs3088589   | 1 | 43820556 | A    | A | A | A | A   | A |
| 224 | mCV23611562 | 1 | 47908310 | G    | A | A | A | A   | A |
| 225 | rs8253394   | 1 | 44490396 | G    | A | A | G | A   | A |
| 226 | rs6328990   | 1 | 44490756 | NONE | G | G | G | G   | G |
| 227 | rs6329563   | 1 | 44490870 | C    | A | A | A | A   | A |
| 228 | rs8253429   | 1 | 44510235 | A    | G | G | A | G   | A |
| 229 | rs4222319   | 1 | 44556886 | C    | C | C | C | C   | C |
| 230 | mCV25321857 | 1 | 49276410 | G    | G | G | A | G   | G |
| 231 | rs6287344   | 1 | 45585331 | G    | G | G | G | G   | G |
| 232 | rs8259907   | 1 | 45663969 | G    | G | G | G | G   | G |
| 233 | rs3091082   | 1 | 45705059 | A    | A | A | A | A   | C |
| 234 | rs3655885   | 1 | 45794573 | T    | T | T | A | T   | A |
| 235 | rs3668645   | 1 | 45803282 | A    | A | A | G | A   | G |
| 236 | rs6370110   | 1 | 45866589 | A    | A | A | G | A   | A |
| 237 | rs6161243   | 1 | 46253419 | A    | A | A | A | A   | A |
| 238 | mCV23596299 | 1 | 50101434 | G    | A | A | A | A   | A |
| 239 | rs6322563   | 1 | 47222530 | G    | G | G | A | G   | G |
| 240 | rs3714543   | 1 | 47399793 | A    | G | G | A | G   | G |
| 241 | rs6248985   | 1 | 47628442 | G    | G | G | G | G   | G |
| 242 | mCV23591750 | 1 | 51617463 | A    | T | T | A | T   | T |
| 243 | rs6181164   | 1 | 47960648 | G    | A | A | A | A   | A |
| 244 | rs3661491   | 1 | 48378539 | A    | G | G | G | G   | G |
| 245 | rs6350409   | 1 | 48440490 | C    | C | C | C | C   | C |
| 246 | rs3682720   | 1 | 48533511 | G    | G | G | C | G   | G |
| 247 | rs6311681   | 1 | 49120883 | T    | T | T | T | T   | T |
| 248 | rs3659331   | 1 | 49569069 | G    | G | G | A | G   | G |
| 249 | rs6260801   | 1 | 50005628 | A    | T | T | T | T   | T |
| 250 | rs6201240   | 1 | 50325597 | G    | A | A | A | A   | A |
| 251 | rs6281180   | 1 | 50578107 | A    | A | A | A | A   | A |
| 252 | rs3724092   | 1 | 50613798 | A    | A | A | C | A   | A |
| 253 | rs3724707   | 1 | 50613890 | A    | A | A | G | A   | A |
| 254 | rs3672520   | 1 | 50947514 | A    | G | G | G | G   | G |
| 255 | rs3699422   | 1 | 51473061 | G    | G | G | G | G   | G |
| 256 | rs6232640   | 1 | 51733707 | A    | A | A | A | A   | A |
| 257 | rs4222323   | 1 | 51837872 | A    | A | A | A | A   | A |
| 258 | rs3663063   | 1 | 51913800 | G    | A | A | A | A   | A |
| 259 | rs3725203   | 1 | 52176938 | A    | G | G | G | G   | G |
| 260 | rs3667466   | 1 | 52222673 | G    | A | A | A | A   | A |
| 261 | rs3668739   | 1 | 52222864 | G    | A | A | A | A   | A |
| 262 | rs4222335   | 1 | 52273996 | A    | A | A | A | A   | A |
| 263 | rs6217547   | 1 | 52308389 | G    | A | A | A | A   | A |
| 264 | rs8239131   | 1 | 52524284 | A    | A | A | A | A   | A |
| 265 | rs6252183   | 1 | 53123445 | G    | G | G | G | G   | G |
| 266 | rs6253368   | 1 | 54162484 | A    | A | A | A | A   | A |
| 267 | rs3666880   | 1 | 55369154 | C    | C | C | C | C   | C |
| 268 | rs3668074   | 1 | 55369352 | C    | C | C | C | C   | C |
| 269 | rs4222342   | 1 | 55369837 | A/G  | G | G | G | A/G | G |
| 270 | mCV23023127 | 1 | 59472326 | A    | A | A | A | A   | A |
| 271 | rs6241350   | 1 | 55683457 | A    | A | A | A | A   | A |
| 272 | rs3723035   | 1 | 55942220 | G    | G | G | G | G   | G |
| 273 | rs3726233   | 1 | 56253497 | A    | A | A | A | A   | A |
| 274 | rs6287068   | 1 | 56566321 | T    | T | T | T | T   | T |
| 275 | rs6190280   | 1 | 56936475 | A    | A | A | A | A   | A |
| 276 | rs3708772   | 1 | 57136600 | G    | G | G | G | G   | G |
| 277 | rs3653534   | 1 | 57196154 | A    | A | A | A | A   | A |
| 278 | rs3089908   | 1 | 57221022 | G    | G | G | G | G   | G |
| 279 | rs3022801   | 1 | 57221053 | G    | G | G | G | G   | G |
| 280 | rs6341554   | 1 | 57291136 | A    | A | A | A | A   | A |
| 281 | rs4222363   | 1 | 57804780 | A    | A | A | A | A   | A |
| 282 | rs3679641   | 1 | 58003090 | G    | G | G | G | G   | G |
| 283 | rs8236470   | 1 | 58422123 | A    | A | A | A | A   | A |
| 284 | rs8238898   | 1 | 58447431 | G    | G | G | G | G   | G |
| 285 | rs8238935   | 1 | 58470193 | A    | A | A | A | A   | A |
| 286 | rs8238949   | 1 | 58471013 | G    | G | G | G | G   | G |
| 287 | rs3686293   | 1 | 58509052 | C    | C | C | C | A   | C |
| 288 | rs4222372   | 1 | 58592916 | G    | A | A | A | G   | A |
| 289 | rs3663226   | 1 | 58629442 | A    | G | G | G | G   | G |
| 290 | rs3725715   | 1 | 58807423 | C    | G | G | G | C   | G |
| 291 | rs4222380   | 1 | 58995519 | A    | A | A | A | A   | A |
| 292 | rs4222383   | 1 | 59247476 | G    | G | G | G | G   | G |
| 293 | rs4222381   | 1 | 59247796 | A    | A | A | A | A   | A |

|     |             |   |          |   |     |     |   |   |     |
|-----|-------------|---|----------|---|-----|-----|---|---|-----|
| 294 | rs6245700   | 1 | 59523855 | A | C   | C   | A | A | C   |
| 295 | rs3713747   | 1 | 59568162 | A | G   | G   | G | G | G   |
| 296 | rs3708287   | 1 | 59581890 | G | A   | A   | A | A | A   |
| 297 | rs3675875   | 1 | 59616435 | A | G   | G   | G | G | G   |
| 298 | rs6282881   | 1 | 60684365 | G | G   | G   | G | G | G   |
| 299 | rs3661555   | 1 | 61165706 | G | G   | G   | G | G | G   |
| 300 | rs8254826   | 1 | 62973583 | G | G   | G   | G | G | G   |
| 301 | rs6249719   | 1 | 61922858 | A | A   | A   | A | A | A   |
| 302 | rs3716105   | 1 | 61943426 | A | A   | A   | A | A | A   |
| 303 | rs6257119   | 1 | 62383801 | A | A   | A   | A | A | A   |
| 304 | mCV24306886 | 1 | 66803983 | A | A   | A   | G | A | A   |
| 305 | rs6244074   | 1 | 63000271 | G | G   | G   | A | G | G   |
| 306 | rs3688436   | 1 | 63053082 | G | G   | G   | A | G | G   |
| 307 | rs3699303   | 1 | 63057729 | C | C   | C   | A | C | C   |
| 308 | rs3690322   | 1 | 63062858 | C | C   | C   | A | C | C   |
| 309 | rs6322485   | 1 | 63649681 | A | A   | A   | T | A | A   |
| 310 | rs3662027   | 1 | 63696981 | A | A   | A   | G | A | A   |
| 311 | rs3703813   | 1 | 63972106 | A | A   | A   | G | A | A   |
| 312 | rs4222401   | 1 | 63988445 | G | G   | G   | G | G | G   |
| 313 | rs3088612   | 1 | 64741555 | C | C   | C   | C | C | C   |
| 314 | rs3699216   | 1 | 64808554 | G | G   | G   | A | G | G   |
| 315 | rs3726861   | 1 | 65086580 | G | G   | G   | A | A | G   |
| 316 | rs3654452   | 1 | 65086845 | A | A   | A   | G | G | A   |
| 317 | rs3679650   | 1 | 65091475 | G | G   | G   | A | A | G   |
| 318 | mCV24085696 | 1 | 69168683 | G | G   | G   | A | G | G   |
| 319 | rs6293581   | 1 | 65143788 | G | G   | G   | A | A | G   |
| 320 | rs6395308   | 1 | 65272783 | G | G   | G   | G | A | G   |
| 321 | rs4222404   | 1 | 65353420 | A | A   | A   | A | A | A   |
| 322 | rs4222405   | 1 | 65353510 | G | G   | G   | G | G | G   |
| 323 | rs3089386   | 1 | 65446024 | A | A   | A   | A | A | A   |
| 324 | rs3022802   | 1 | 65446114 | C | C   | C   | A | C | C   |
| 325 | rs4137302   | 1 | 65909810 | G | G   | G   | A | G | G   |
| 326 | rs6194369   | 1 | 66121673 | G | G   | G   | G | G | G   |
| 327 | rs3719486   | 1 | 66298840 | A | A   | A   | G | A | A   |
| 328 | rs6162259   | 1 | 66387841 | G | G   | G   | G | G | G   |
| 329 | rs3722989   | 1 | 67112327 | G | G   | G   | A | G | G   |
| 330 | rs4222406   | 1 | 67193344 | G | G   | G   | A | G | G   |
| 331 | rs3712639   | 1 | 67373031 | A | A   | A   | C | A | A   |
| 332 | rs3698088   | 1 | 67742707 | G | G   | G   | A | G | G   |
| 333 | rs6368250   | 1 | 67981741 | A | A   | A   | G | A | A   |
| 334 | rs3665792   | 1 | 68182670 | G | G   | G   | A | G | G   |
| 335 | rs3697638   | 1 | 68256628 | G | G   | G   | A | G | G   |
| 336 | rs3022803   | 1 | 68282629 | C | C   | C   | A | C | C   |
| 337 | rs3720839   | 1 | 68492187 | A | G   | G   | G | A | G   |
| 338 | rs6288543   | 1 | 68917890 | A | A   | A   | T | A | A   |
| 339 | rs3688421   | 1 | 68960316 | G | G   | G   | A | G | G   |
| 340 | rs3681669   | 1 | 69536221 | G | G   | G   | A | G | G   |
| 341 | rs3690668   | 1 | 69556576 | C | C   | C   | A | C | C   |
| 342 | rs3659932   | 1 | 69663163 | A | A   | A   | G | A | A   |
| 343 | mCV23057534 | 1 | 74035890 | C | C   | C   | A | C | A   |
| 344 | rs6332333   | 1 | 70916947 | G | G   | G   | G | G | G   |
| 345 | rs4222410   | 1 | 71141705 | G | G   | G   | G | G | G   |
| 346 | rs4222413   | 1 | 71494310 | A | A   | A   | A | A | A   |
| 347 | mCV22629698 | 1 | 76106271 | C | A   | A   | C | C | C   |
| 348 | rs6191076   | 1 | 72377589 | A | C   | C   | A | A | A   |
| 349 | rs3722564   | 1 | 72536254 | C | A   | A   | C | C | C   |
| 350 | rs4222426   | 1 | 72822922 | G | A   | A   | G | G | G   |
| 351 | mCV24115911 | 1 | 76984491 | G | A   | A   | G | G | A   |
| 352 | rs2020469   | 1 | 72892720 | A | A   | A   | A | A | A   |
| 353 | rs3687595   | 1 | 73120598 | G | A   | A   | G | A | G   |
| 354 | rs6163328   | 1 | 73243855 | C | A   | A   | C | C | C   |
| 355 | rs4222429   | 1 | 73294036 | A | A   | A   | A | A | A   |
| 356 | rs6214216   | 1 | 73298313 | A | A   | A   | A | A | A   |
| 357 | rs3021883   | 1 | 73308713 | G | A   | A   | G | G | G   |
| 358 | rs3665947   | 1 | 73492476 | A | C   | C   | A | A | A   |
| 359 | mCV22884877 | 1 | 78129333 | A | A   | A   | G | G | A   |
| 360 | mCV23042608 | 1 | 78210733 | G | A/G | A/G | G | G | A/G |
| 361 | rs6238696   | 1 | 74205245 | G | G   | G   | G | G | G   |
| 362 | rs3678350   | 1 | 74506287 | C | C   | C   | A | C | A   |
| 363 | rs8253451   | 1 | 74619619 | G | G   | G   | G | G | G   |
| 364 | rs3713616   | 1 | 74900046 | G | G   | G   | A | G | A   |
| 365 | rs4222453   | 1 | 74988989 | G | G   | G   | G | G | G   |
| 366 | rs3089921   | 1 | 75146756 | G | G   | G   | G | G | G   |
| 367 | rs6356603   | 1 | 75362320 | A | T   | T   | A | T | A   |

|     |             |   |          |   |   |   |   |   |   |
|-----|-------------|---|----------|---|---|---|---|---|---|
| 368 | rs3702635   | 1 | 75930259 | A | C | C | C | A | C |
| 369 | rs4222458   | 1 | 75955813 | C | C | C | C | C | C |
| 370 | mCV23431007 | 1 | 80839073 | G | G | G | G | A | G |
| 371 | rs3680779   | 1 | 76295249 | A | G | G | A | A | A |
| 372 | rs6237227   | 1 | 76302351 | A | C | C | A | A | A |
| 373 | rs3090333   | 1 | 76369467 | A | A | A | A | A | A |
| 374 | rs3689327   | 1 | 76410223 | G | A | A | G | G | G |
| 375 | rs3676306   | 1 | 76655143 | G | C | C | G | G | G |
| 376 | rs3699038   | 1 | 76846395 | A | C | C | C | A | A |
| 377 | rs6382116   | 1 | 76875875 | A | A | A | A | A | A |
| 378 | mCV23433457 | 1 | 81493440 | T | T | T | A | A | T |
| 379 | rs3090737   | 1 | 77145500 | A | A | A | A | A | A |
| 380 | rs3715800   | 1 | 77348073 | G | G | G | A | A | G |
| 381 | rs3670525   | 1 | 77408016 | G | G | G | A | A | G |
| 382 | rs6200201   | 1 | 77599384 | A | A | A | G | G | G |
| 383 | rs3722710   | 1 | 77684642 | G | A | A | G | G | G |
| 384 | rs3672387   | 1 | 77953642 | G | G | G | A | A | G |
| 385 | rs3703285   | 1 | 78023442 | G | A | A | G | G | A |
| 386 | rs6321468   | 1 | 78484909 | A | A | A | G | G | A |
| 387 | rs3091091   | 1 | 78557484 | G | G | G | G | G | G |
| 388 | rs3667200   | 1 | 78622208 | G | G | G | A | A | G |
| 389 | rs4222463   | 1 | 78586698 | A | A | A | A | A | A |
| 390 | rs4222459   | 1 | 78586608 | G | G | G | G | G | G |
| 391 | rs6182343   | 1 | 78786284 | A | A | A | G | G | A |
| 392 | rs4222472   | 1 | 78895325 | A | A | A | A | A | A |
| 393 | rs6401883   | 1 | 79039814 | A | A | A | A | A | A |
| 394 | rs3692514   | 1 | 79247521 | G | A | A | A | A | G |
| 395 | rs8253472   | 1 | 79953904 | G | G | G | G | G | G |
| 396 | rs8253473   | 1 | 79954389 | A | A | A | C | C | A |
| 397 | rs4222478   | 1 | 79954778 | A | A | A | A | A | A |
| 398 | rs8253469   | 1 | 79954839 | G | G | G | G | G | G |
| 399 | rs3692549   | 1 | 80277258 | C | C | C | A | A | C |
| 400 | rs6157189   | 1 | 80279272 | A | A | A | A | A | A |
| 401 | rs3675339   | 1 | 80417261 | C | C | C | G | G | C |
| 402 | rs6379484   | 1 | 81076550 | A | A | A | A | A | A |
| 403 | rs6306738   | 1 | 81826643 | C | C | C | C | C | C |
| 404 | rs6290463   | 1 | 81891125 | A | A | A | G | G | G |
| 405 | rs6207863   | 1 | 82384635 | A | A | A | T | T | T |
| 406 | rs3708204   | 1 | 82599182 | C | A | A | C | C | C |
| 407 | rs3682229   | 1 | 82603755 | G | A | A | G | G | G |
| 408 | rs6329101   | 1 | 82888512 | A | A | A | A | A | A |
| 409 | rs4222480   | 1 | 83783360 | G | G | G | G | G | G |
| 410 | rs3089629   | 1 | 84621062 | C | C | C | C | C | C |
| 411 | rs4222486   | 1 | 84836130 | A | A | A | A | A | A |
| 412 | rs6335678   | 1 | 84842577 | A | A | A | A | A | A |
| 413 | rs6154738   | 1 | 85304810 | C | C | C | C | C | C |
| 414 | rs8253487   | 1 | 85545924 | G | G | G | G | G | G |
| 415 | rs8253485   | 1 | 85546004 | G | G | G | G | G | G |
| 416 | rs8253483   | 1 | 85546254 | A | A | A | A | A | A |
| 417 | rs3678377   | 1 | 85674579 | G | G | G | A | G | G |
| 418 | rs6337132   | 1 | 85793140 | C | C | C | C | C | C |
| 419 | rs3723062   | 1 | 85865441 | A | A | A | G | A | A |
| 420 | rs3694406   | 1 | 86305470 | A | A | A | G | A | A |
| 421 | rs4222490   | 1 | 86428221 | G | G | G | G | G | G |
| 422 | rs3690292   | 1 | 86488097 | A | A | A | G | G | A |
| 423 | rs3669598   | 1 | 86805316 | A | A | A | C | C | A |
| 424 | rs6281921   | 1 | 86846297 | G | G | G | G | G | G |
| 425 | rs8252886   | 1 | 87095892 | G | G | G | G | G | G |
| 426 | rs8252888   | 1 | 87095918 | T | T | T | T | T | T |
| 427 | rs8252890   | 1 | 87096046 | A | A | A | A | A | A |
| 428 | rs4222496   | 1 | 87103024 | G | G | G | G | G | G |
| 429 | rs6389062   | 1 | 87847249 | A | A | A | A | A | A |
| 430 | mCV22863351 | 1 | 90003736 | A | A | A | A | G | A |
| 431 | rs3655427   | 1 | 88032840 | G | G | A | A | G | G |
| 432 | rs8258190   | 1 | 88110441 | T | T | T | T | T | T |
| 433 | rs8258188   | 1 | 88111476 | G | G | G | G | G | G |
| 434 | rs3670389   | 1 | 88653077 | G | G | A | A | G | G |
| 435 | rs3693508   | 1 | 88905194 | C | C | C | C | C | C |
| 436 | rs4222508   | 1 | 89065860 | G | G | A | A | A | G |
| 437 | rs4222507   | 1 | 89065986 | G | G | A | A | A | G |
| 438 | rs6189552   | 1 | 89442405 | A | A | A | A | A | A |
| 439 | mCV24380249 | 1 | 92063384 | T | T | T | T | A | T |
| 440 | rs3684025   | 1 | 90370182 | A | A | G | A | A | A |
| 441 | rs3089918   | 1 | 90567388 | A | A | A | A | A | A |

|     |             |   |           |      |   |   |   |   |   |
|-----|-------------|---|-----------|------|---|---|---|---|---|
| 442 | rs3022827   | 1 | 90567434  | G    | G | A | G | G | G |
| 443 | rs3702854   | 1 | 90733001  | G    | A | A | A | A | G |
| 444 | rs4135536   | 1 | 90815588  | A    | A | A | G | G | A |
| 445 | rs4138577   | 1 | 90920916  | A    | G | G | G | G | A |
| 446 | rs3687969   | 1 | 91016311  | G    | A | A | G | G | G |
| 447 | rs6356583   | 1 | 91202338  | G    | G | G | G | G | G |
| 448 | rs4222523   | 1 | 91481659  | A    | A | A | A | A | A |
| 449 | rs3686660   | 1 | 91493572  | G    | A | A | A | G | G |
| 450 | rs3664800   | 1 | 91752577  | G    | A | A | G | G | G |
| 451 | rs6285286   | 1 | 91880671  | G    | G | G | G | G | G |
| 452 | mCV24377815 | 1 | 93847721  | G    | G | G | A | G | G |
| 453 | rs3089830   | 1 | 92335881  | A    | A | A | A | A | A |
| 454 | rs6345367   | 1 | 92546322  | A    | A | A | A | A | A |
| 455 | rs8277054   | 1 | 92879113  | A    | A | A | A | A | A |
| 456 | rs4222530   | 1 | 92881578  | A    | A | A | A | A | A |
| 457 | rs8239165   | 1 | 92974654  | C    | C | C | C | C | C |
| 458 | rs3723232   | 1 | 93016179  | A    | A | A | G | A | G |
| 459 | mCV24817024 | 1 | 95061106  | G    | C | C | C | G | C |
| 460 | rs3683358   | 1 | 93162732  | G    | G | A | A | G | G |
| 461 | rs3692309   | 1 | 93188277  | A    | A | A | C | A | A |
| 462 | rs6268443   | 1 | 93319361  | G    | G | G | A | G | G |
| 463 | rs3088531   | 1 | 93398192  | G    | G | G | G | G | G |
| 464 | rs6308266   | 1 | 93565178  | G    | G | G | G | G | G |
| 465 | rs4221925   | 1 | 93739088  | A    | A | A | A | A | A |
| 466 | rs6334006   | 1 | 94492281  | C    | C | C | C | C | C |
| 467 | rs3675505   | 1 | 95019059  | G    | A | A | A | G | A |
| 468 | rs6221119   | 1 | 95225416  | G    | G | G | G | G | G |
| 469 | rs4136618   | 1 | 95735262  | G    | A | A | A | G | A |
| 470 | rs6175979   | 1 | 95799863  | G    | A | A | A | G | A |
| 471 | rs6169995   | 1 | 95917602  | A    | A | A | A | A | A |
| 472 | rs3726669   | 1 | 96875139  | A    | T | T | T | A | T |
| 473 | rs6276969   | 1 | 97652743  | G    | G | G | G | G | G |
| 474 | rs8260479   | 1 | 97734334  | A    | A | A | A | A | A |
| 475 | rs3088469   | 1 | 98013583  | A    | A | A | A | A | A |
| 476 | rs6343692   | 1 | 98338303  | G    | G | G | G | G | G |
| 477 | rs3695980   | 1 | 99464143  | A    | T | T | T | A | T |
| 478 | rs3668458   | 1 | 99468628  | A    | G | G | G | A | G |
| 479 | rs6169301   | 1 | 99478610  | G    | G | G | G | G | G |
| 480 | rs6226332   | 1 | 99755580  | T    | T | T | T | T | T |
| 481 | mCV23748993 | 1 | 101977176 | C    | A | A | A | C | A |
| 482 | rs3685663   | 1 | 100268247 | A    | G | G | G | A | G |
| 483 | rs6238133   | 1 | 100514988 | G    | G | G | G | G | G |
| 484 | rs6177448   | 1 | 101418384 | G    | G | G | G | G | G |
| 485 | rs3655293   | 1 | 101731906 | C    | A | A | A | C | A |
| 486 | rs3719046   | 1 | 101871731 | NONE | A | A | A | G | A |
| 487 | rs6191585   | 1 | 102177808 | T    | T | T | T | T | T |
| 488 | mCV25151171 | 1 | 105302182 | A    | A | A | G | A | A |
| 489 | rs6365547   | 1 | 103144363 | C    | C | C | C | C | C |
| 490 | rs3707664   | 1 | 103345801 | G    | G | G | G | G | G |
| 491 | rs6370992   | 1 | 104865066 | T    | T | T | T | T | T |
| 492 | rs3707424   | 1 | 105241938 | G    | A | A | G | G | A |
| 493 | rs3696200   | 1 | 105266613 | T    | T | T | A | T | T |
| 494 | rs3692731   | 1 | 105952948 | G    | A | A | G | G | A |
| 495 | rs3090077   | 1 | 106508879 | G    | G | G | G | G | G |
| 496 | rs4222565   | 1 | 106854872 | A    | A | A | A | A | A |
| 497 | rs6170540   | 1 | 106913583 | A    | A | A | A | A | A |
| 498 | rs3664301   | 1 | 107059245 | A    | G | G | A | A | G |
| 499 | rs6398681   | 1 | 107588935 | A    | T | T | T | A | T |
| 500 | rs3088689   | 1 | 107737982 | T    | T | T | T | T | T |
| 501 | rs3689841   | 1 | 108045516 | T    | A | A | A | T | A |
| 502 | rs6194816   | 1 | 108229496 | C    | C | C | C | C | C |
| 503 | rs3663003   | 1 | 108755734 | C    | C | C | A | C | C |
| 504 | rs3685665   | 1 | 108829325 | A    | C | A | C | A | C |
| 505 | rs6405157   | 1 | 109534583 | A    | A | A | A | A | A |
| 506 | rs3685919   | 1 | 109634975 | A    | A | A | G | A | A |
| 507 | mCV22824651 | 1 | 112342512 | A    | A | A | A | G | G |
| 508 | rs6382744   | 1 | 109866496 | C    | C | C | C | A | A |
| 509 | rs6356298   | 1 | 110799560 | C    | C | C | C | C | C |
| 510 | rs3710646   | 1 | 110959265 | C    | C | C | A | C | C |
| 511 | rs3722486   | 1 | 110985352 | A    | A | A | G | G | G |
| 512 | rs3693142   | 1 | 111176675 | G    | G | G | A | A | A |
| 513 | rs6342760   | 1 | 111302057 | A    | A | A | A | A | A |
| 514 | mCV23695506 | 1 | 114421193 | T    | T | T | A | T | T |
| 515 | rs3726043   | 1 | 111780707 | G    | G | G | A | A | A |

|     |             |   |           |   |   |   |   |     |   |
|-----|-------------|---|-----------|---|---|---|---|-----|---|
| 516 | rs3657012   | 1 | 111784281 | T | T | T | A | A   | A |
| 517 | rs3673856   | 1 | 112097434 | A | A | A | G | A   | A |
| 518 | rs6242357   | 1 | 112435540 | A | A | A | A | A   | A |
| 519 | rs6244177   | 1 | 112767627 | A | A | A | A | A/G | G |
| 520 | mCV24201027 | 1 | 115751113 | G | G | A | G | A   | G |
| 521 | rs3693265   | 1 | 113150455 | C | C | C | G | C   | G |
| 522 | rs3721888   | 1 | 113375760 | A | A | A | G | G   | G |
| 523 | rs3662693   | 1 | 113556351 | A | A | A | C | C   | A |
| 524 | rs6270144   | 1 | 113617641 | G | G | G | G | G   | G |
| 525 | rs3697152   | 1 | 113691025 | G | G | G | A | A   | A |
| 526 | rs3725808   | 1 | 114183371 | G | G | A | G | A   | G |
| 527 | rs3684324   | 1 | 114187805 | A | A | G | A | G   | A |
| 528 | rs6375239   | 1 | 114928764 | A | A | A | A | A   | A |
| 529 | rs3696077   | 1 | 115014679 | G | G | A | G | A   | G |
| 530 | mCV22804366 | 1 | 117713098 | T | A | A | T | A   | T |
| 531 | rs3662498   | 1 | 115218241 | G | G | G | A | G   | G |
| 532 | rs6346019   | 1 | 115413753 | G | G | G | G | G   | G |
| 533 | rs6163037   | 1 | 115836271 | G | G | A | A | A   | G |
| 534 | rs6323783   | 1 | 116094786 | A | A | A | A | A   | A |
| 535 | rs3724298   | 1 | 116291109 | A | A | A | C | A   | A |
| 536 | rs3725409   | 1 | 116434018 | A | G | G | G | G   | A |
| 537 | mCV22708763 | 1 | 119316169 | A | A | A | A | A   | A |
| 538 | rs3694901   | 1 | 116786547 | A | T | T | A | T   | A |
| 539 | rs3727162   | 1 | 116954774 | A | C | C | C | C   | A |
| 540 | rs6179293   | 1 | 116972222 | A | G | G | G | G   | A |
| 541 | rs3694226   | 1 | 117143094 | A | A | A | G | A   | A |
| 542 | rs6347845   | 1 | 117301398 | A | G | G | G | G   | A |
| 543 | rs3674655   | 1 | 117379659 | C | C | C | G | C   | C |
| 544 | rs6187505   | 1 | 117508758 | G | G | G | G | G   | G |
| 545 | rs3679459   | 1 | 118198878 | G | A | A | A | A   | G |
| 546 | rs6216134   | 1 | 118236415 | A | A | A | G | A   | A |
| 547 | rs3695581   | 1 | 118500635 | G | A | A | G | A   | G |
| 548 | rs6391635   | 1 | 118607078 | G | G | G | G | G   | G |
| 549 | rs3719973   | 1 | 118834067 | A | A | A | G | A   | A |
| 550 | rs3724153   | 1 | 118844172 | G | G | G | A | G   | G |
| 551 | rs6298343   | 1 | 118999101 | G | G | G | G | G   | G |
| 552 | rs6373485   | 1 | 119261214 | A | A | A | G | A   | G |
| 553 | rs3723088   | 1 | 119832140 | G | G | G | A | G   | G |
| 554 | rs3678121   | 1 | 119901621 | A | A | A | G | A   | A |
| 555 | rs3696498   | 1 | 120067656 | G | G | G | C | G   | G |
| 556 | rs6230293   | 1 | 120079867 | G | G | G | A | G   | G |
| 557 | rs6247820   | 1 | 120541604 | A | A | A | A | A   | A |
| 558 | rs3667720   | 1 | 120697988 | G | G | G | C | G   | C |
| 559 | rs3709675   | 1 | 120831727 | G | G | G | A | G   | A |
| 560 | rs3659976   | 1 | 120842643 | A | A | A | A | A   | A |
| 561 | mCV23664640 | 1 | 124504905 | C | G | G | G | C   | C |
| 562 | rs3686671   | 1 | 121712148 | G | G | G | A | G   | G |
| 563 | rs6163600   | 1 | 121970051 | A | A | A | A | A   | A |
| 564 | rs6288019   | 1 | 122600243 | A | G | G | A | A   | A |
| 565 | rs6161239   | 1 | 123117528 | G | G | G | G | G   | G |
| 566 | rs6320798   | 1 | 123126320 | T | T | T | A | A   | A |
| 567 | rs3691057   | 1 | 123194531 | A | A | A | G | G   | G |
| 568 | rs3694822   | 1 | 123642529 | A | A | A | C | C   | C |
| 569 | rs3088725   | 1 | 124249458 | A | G | G | G | G   | G |
| 570 | rs6189020   | 1 | 124433526 | G | A | A | A | G   | G |
| 571 | rs3698067   | 1 | 124629280 | A | G | G | G | G   | A |
| 572 | rs3687720   | 1 | 124828004 | G | A | A | G | A   | G |
| 573 | rs3697826   | 1 | 124896697 | A | G | G | G | G   | G |
| 574 | rs3022832   | 1 | 125100062 | G | G | G | C | G   | G |
| 575 | rs4137908   | 1 | 125475941 | A | G | G | G | G   | A |
| 576 | rs3090765   | 1 | 125695758 | A | A | A | C | A   | C |
| 577 | rs4222577   | 1 | 125699151 | G | G | G | A | G   | A |
| 578 | rs4222579   | 1 | 125699272 | A | A | A | C | A   | C |
| 579 | rs4222584   | 1 | 125703426 | G | G | G | C | G   | C |
| 580 | rs4222583   | 1 | 125703682 | G | G | G | G | G   | G |
| 581 | rs3716165   | 1 | 125769962 | G | G | G | A | G   | A |
| 582 | rs6254676   | 1 | 125856717 | A | A | A | A | A   | A |
| 583 | mCV23162659 | 1 | 128951433 | G | G | G | G | G   | G |
| 584 | rs6281562   | 1 | 126123079 | G | G | G | A | G   | A |
| 585 | rs6188380   | 1 | 126268669 | G | G | G | A | G   | A |
| 586 | rs6228473   | 1 | 126460218 | A | A | A | G | A   | G |
| 587 | rs3662928   | 1 | 126483684 | A | A | A | G | A   | G |
| 588 | rs3088540   | 1 | 126546056 | A | A | A | A | A   | A |
| 589 | rs3691374   | 1 | 126763355 | A | A | A | G | A   | A |



|     |             |   |           |     |   |   |   |   |   |
|-----|-------------|---|-----------|-----|---|---|---|---|---|
| 590 | rs6263067   | 1 | 126998549 | G   | G | G | A | G | G |
| 591 | rs3714423   | 1 | 127018944 | G   | G | G | A | G | G |
| 592 | rs4222589   | 1 | 127260664 | A   | A | A | A | A | A |
| 593 | rs6309523   | 1 | 128073171 | A/G | G | G | G | G | G |
| 594 | rs6354736   | 1 | 128165659 | G   | A | A | A | G | G |
| 595 | rs6360388   | 1 | 128382293 | A   | A | A | A | A | A |
| 596 | rs8256197   | 1 | 128426093 | A   | A | A | G | A | A |
| 597 | rs8256196   | 1 | 128426126 | A   | A | A | G | A | A |
| 598 | rs8243514   | 1 | 128427104 | A   | A | A | A | A | A |
| 599 | rs8256174   | 1 | 128428865 | A   | A | A | A | A | A |
| 600 | rs3723276   | 1 | 128453766 | G   | G | G | A | G | G |
| 601 | mCV24753602 | 1 | 131899095 | A   | G | G | G | A | G |
| 602 | rs3090725   | 1 | 129216924 | C   | C | C | C | C | C |
| 603 | rs6379018   | 1 | 129282488 | A   | A | A | A | A | A |
| 604 | rs6355835   | 1 | 130487043 | A   | A | A | A | A | A |
| 605 | rs4222601   | 1 | 130504159 | G   | G | G | G | G | G |
| 606 | rs4222611   | 1 | 130613339 | G   | G | G | G | G | G |
| 607 | rs6257371   | 1 | 130935380 | A   | A | A | A | A | A |
| 608 | rs3699561   | 1 | 130962369 | A   | G | G | G | A | A |
| 609 | rs3724826   | 1 | 131376437 | G   | A | A | A | G | G |
| 610 | rs6250833   | 1 | 131532754 | A   | G | G | G | A | A |
| 611 | rs3718090   | 1 | 131636546 | G   | A | A | A | G | G |
| 612 | rs4222635   | 1 | 131854580 | G   | G | G | G | G | G |
| 613 | rs4222630   | 1 | 131854769 | G   | G | G | G | G | G |
| 614 | rs3713473   | 1 | 131948608 | T   | A | A | A | T | A |
| 615 | rs3678662   | 1 | 132359677 | G   | A | A | G | G | A |
| 616 | rs3681022   | 1 | 132451217 | G   | A | A | A | A | A |
| 617 | rs3713478   | 1 | 132668384 | G   | G | G | G | G | A |
| 618 | rs6241653   | 1 | 132978623 | A   | G | G | G | A | G |
| 619 | rs6331598   | 1 | 133746515 | C   | C | C | C | C | C |
| 620 | mCV24510697 | 1 | 137099135 | T   | A | A | A | T | A |
| 621 | rs4222644   | 1 | 134088014 | G   | G | G | G | G | G |
| 622 | rs4222650   | 1 | 134188548 | G   | G | G | G | G | G |
| 623 | rs4222651   | 1 | 134189626 | G   | G | G | G | G | G |
| 624 | rs3703729   | 1 | 134418903 | G   | G | G | A | G | G |
| 625 | rs6195473   | 1 | 134441421 | G   | G | G | G | G | G |
| 626 | rs3664806   | 1 | 134544118 | C   | C | C | A | C | C |
| 627 | rs6290558   | 1 | 134948045 | G   | G | G | A | G | G |
| 628 | rs8250053   | 1 | 135044501 | T   | T | T | A | T | T |
| 629 | rs8271110   | 1 | 135160893 | A   | A | A | G | G | G |
| 630 | rs8270851   | 1 | 135171872 | A   | A | A | T | A | A |
| 631 | rs4222666   | 1 | 135271276 | G   | G | G | A | G | G |
| 632 | rs3667307   | 1 | 135404032 | G   | G | G | A | G | G |
| 633 | rs8260536   | 1 | 135690070 | A   | C | C | C | A | C |
| 634 | rs8236489   | 1 | 135694188 | A   | A | A | G | A | A |
| 635 | rs8236490   | 1 | 135694634 | A   | A | A | A | A | A |
| 636 | rs8239512   | 1 | 135694700 | G   | G | G | C | G | G |
| 637 | rs3674857   | 1 | 135720939 | A   | G | G | G | A | G |
| 638 | rs3022842   | 1 | 135723686 | G   | A | A | A | G | A |
| 639 | rs6209720   | 1 | 135821029 | G   | G | G | G | G | G |
| 640 | rs3691222   | 1 | 136202062 | G   | A | A | A | G | A |
| 641 | rs6359631   | 1 | 136664129 | A   | A | A | A | A | A |
| 642 | mCV24712435 | 1 | 139758846 | A   | A | A | C | C | A |
| 643 | rs4222670   | 1 | 136809624 | T   | T | T | T | T | T |
| 644 | rs4222667   | 1 | 136809837 | G   | G | G | G | G | G |
| 645 | rs3688929   | 1 | 136944348 | A   | G | G | G | A | G |
| 646 | rs6250257   | 1 | 137529520 | A   | G | G | A | A | G |
| 647 | rs3712900   | 1 | 137775519 | A   | A | A | G | A | A |
| 648 | mCV24707614 | 1 | 141186686 | G   | C | C | C | C | C |
| 649 | rs6388989   | 1 | 138040472 | A   | A | A | A | A | G |
| 650 | rs6327536   | 1 | 138154871 | C   | A | A | C | C | C |
| 651 | rs6374344   | 1 | 139394100 | T   | T | T | T | T | T |
| 652 | rs3666261   | 1 | 139403008 | A   | G | G | A | A | G |
| 653 | rs6309356   | 1 | 140514012 | G   | G | G | G | G | G |
| 654 | mCV23582257 | 1 | 144412111 | A   | A | A | C | C | A |
| 655 | rs3726927   | 1 | 141024820 | A   | A | A | T | T | A |
| 656 | rs6313878   | 1 | 141395165 | A   | A | A | A | A | A |
| 657 | mCV23572856 | 1 | 145483327 | A   | G | G | A | A | G |
| 658 | rs3677844   | 1 | 142083512 | A   | A | A | G | G | A |
| 659 | rs6398676   | 1 | 142241603 | A   | A | A | A | A | A |
| 660 | rs6382880   | 1 | 142470600 | T   | T | T | A | A | T |
| 661 | rs3657970   | 1 | 142976384 | G   | A | A | G | G | A |
| 662 | rs3022841   | 1 | 143203110 | G   | A | A | A | A | A |
| 663 | rs6295690   | 1 | 143282073 | G   | G | G | G | G | G |

|     |             |   |           |   |   |   |   |   |   |
|-----|-------------|---|-----------|---|---|---|---|---|---|
| 664 | rs3703202   | 1 | 143834489 | A | A | A | T | T | A |
| 665 | rs3655943   | 1 | 144089161 | G | A | A | G | G | A |
| 666 | rs6171515   | 1 | 144154535 | T | T | T | T | T | T |
| 667 | rs6194815   | 1 | 144730521 | C | C | C | A | A | C |
| 668 | rs3718645   | 1 | 144835918 | A | C | C | A | A | C |
| 669 | rs3722469   | 1 | 145409234 | A | G | G | G | G | G |
| 670 | rs6364156   | 1 | 146112228 | G | A | A | A | G | A |
| 671 | rs6185344   | 1 | 146239381 | A | C | C | C | A | C |
| 672 | rs3022838   | 1 | 146390257 | G | A | A | A | G | A |
| 673 | rs3705105   | 1 | 146472985 | A | G | G | G | A | G |
| 674 | rs3089732   | 1 | 146776582 | G | G | G | G | G | G |
| 675 | rs3688638   | 1 | 146986258 | C | A | A | C | C | A |
| 676 | rs3711440   | 1 | 147155745 | A | G | G | G | A | G |
| 677 | rs6287238   | 1 | 147515993 | A | A | A | A | A | A |
| 678 | rs6156126   | 1 | 148195572 | C | C | C | C | C | C |
| 679 | rs3657056   | 1 | 148825962 | G | G | G | A | G | G |
| 680 | rs6259479   | 1 | 148892765 | A | A | A | A | A | A |
| 681 | rs6411476   | 1 | 148913234 | A | G | G | G | A | A |
| 682 | rs6261978   | 1 | 149633978 | C | C | C | C | C | C |
| 683 | mCV24629487 | 1 | 153740686 | A | A | A | A | C | C |
| 684 | rs3654223   | 1 | 149755613 | A | C | C | A | A | C |
| 685 | rs3655459   | 1 | 149755775 | G | A | A | G | G | A |
| 686 | rs3680116   | 1 | 149760366 | G | C | C | G | C | C |
| 687 | rs4222679   | 1 | 149802753 | A | A | A | A | A | A |
| 688 | rs8238845   | 1 | 150035150 | A | A | A | A | A | A |
| 689 | rs8238862   | 1 | 150036792 | G | G | G | G | G | G |
| 690 | rs8238863   | 1 | 150037246 | A | A | A | A | A | A |
| 691 | rs6325623   | 1 | 150619645 | A | G | G | G | G | G |
| 692 | rs3676801   | 1 | 150705980 | C | G | G | G | G | G |
| 693 | rs6393307   | 1 | 150967309 | C | C | C | C | C | C |
| 694 | rs3688042   | 1 | 151217854 | G | A | A | G | G | G |
| 695 | rs4222683   | 1 | 151325897 | G | G | G | G | G | G |
| 696 | rs6263578   | 1 | 151459063 | G | G | G | C | G | G |
| 697 | rs4222695   | 1 | 152338330 | A | A | A | A | A | A |
| 698 | rs3688785   | 1 | 152499712 | A | G | G | G | G | G |
| 699 | rs6267646   | 1 | 152516981 | A | A | A | A | G | A |
| 700 | rs6207200   | 1 | 152591605 | A | A | A | A | A | A |
| 701 | rs3706385   | 1 | 152595237 | G | A | A | A | A | A |
| 702 | rs4222700   | 1 | 153097502 | C | C | C | C | C | C |
| 703 | rs6305232   | 1 | 153201897 | A | T | T | T | T | T |
| 704 | rs3674280   | 1 | 153207764 | A | G | G | G | G | G |
| 705 | rs6362681   | 1 | 153446392 | G | G | G | G | A | A |
| 706 | rs8242884   | 1 | 153881732 | G | G | G | G | G | G |
| 707 | rs8242897   | 1 | 153883852 | G | G | G | G | C | C |
| 708 | rs8242929   | 1 | 153886245 | A | A | A | A | A | A |
| 709 | rs6181202   | 1 | 154592603 | A | A | A | A | C | A |
| 710 | rs4222704   | 1 | 155120600 | G | G | G | G | G | G |
| 711 | rs6248193   | 1 | 155445258 | G | G | G | G | G | G |
| 712 | rs3709142   | 1 | 155805622 | A | A | A | G | A | A |
| 713 | rs6385438   | 1 | 155837938 | G | G | G | G | G | G |
| 714 | rs4222717   | 1 | 156320692 | A | A | A | A | A | A |
| 715 | rs4222712   | 1 | 156320852 | A | A | A | A | A | A |
| 716 | rs3677638   | 1 | 156461112 | A | G | G | A | G | G |
| 717 | rs3711833   | 1 | 156645988 | C | C | C | A | C | C |
| 718 | rs3721839   | 1 | 156732054 | T | A | A | T | A | A |
| 719 | rs4222732   | 1 | 156807973 | G | A | A | G | A | A |
| 720 | rs4222731   | 1 | 156808094 | A | C | C | A | C | C |
| 721 | rs3719034   | 1 | 157158100 | G | G | G | G | A | G |
| 722 | rs6384235   | 1 | 157209759 | G | G | G | G | A | G |
| 723 | rs6400326   | 1 | 157366888 | G | G | A | G | G | A |
| 724 | rs3726420   | 1 | 157711587 | A | G | A | G | G | A |
| 725 | rs6387609   | 1 | 157898706 | A | A | A | A | C | A |
| 726 | rs3696645   | 1 | 157941226 | A | G | G | G | A | G |
| 727 | rs3653666   | 1 | 158553484 | A | A | G | A | G | A |
| 728 | rs6318983   | 1 | 158797908 | G | G | G | G | A | G |
| 729 | rs3709285   | 1 | 159043870 | A | A | C | A | C | A |
| 730 | rs3701299   | 1 | 159111737 | A | G | G | A | G | A |
| 731 | rs3719736   | 1 | 159200954 | C | C | C | C | A | C |
| 732 | rs6297729   | 1 | 159642757 | G | G | G | G | A | G |
| 733 | rs3022845   | 1 | 159766079 | G | G | G | G | A | G |
| 734 | rs3701630   | 1 | 159892022 | A | A | G | G | G | A |
| 735 | rs6180312   | 1 | 159901077 | G | G | G | G | G | G |
| 736 | rs3674707   | 1 | 160235332 | G | A | G | A | G | A |
| 737 | rs3693161   | 1 | 160294867 | G | G | G | G | A | G |

|     |             |   |           |   |   |   |   |      |   |
|-----|-------------|---|-----------|---|---|---|---|------|---|
| 738 | rs3662685   | 1 | 160516559 | C | C | C | C | G    | C |
| 739 | rs6176869   | 1 | 160845853 | G | G | G | G | A    | G |
| 740 | rs4135672   | 1 | 161068696 | A | G | A | G | G    | G |
| 741 | rs3703679   | 1 | 161182098 | G | G | A | A | A    | A |
| 742 | rs4135752   | 1 | 161344083 | A | A | A | A | C    | A |
| 743 | rs3661305   | 1 | 161529176 | C | A | C | A | A    | A |
| 744 | rs6225956   | 1 | 161568305 | A | A | A | A | G    | A |
| 745 | rs3689151   | 1 | 161850281 | A | A | T | A | A    | A |
| 746 | rs4222742   | 1 | 161983558 | G | G | G | G | G    | G |
| 747 | rs3677385   | 1 | 162154091 | C | C | C | C | A    | C |
| 748 | rs6297557   | 1 | 162159298 | C | C | C | C | G    | C |
| 749 | rs3685643   | 1 | 162261064 | G | G | G | A | G    | A |
| 750 | rs3686149   | 1 | 162261116 | A | A | A | T | A    | T |
| 751 | rs3686151   | 1 | 162261117 | G | G | A | A | G    | A |
| 752 | rs3669913   | 1 | 162304551 | A | A | A | G | A    | G |
| 753 | rs4222750   | 1 | 162614632 | G | G | G | G | G    | G |
| 754 | rs4222753   | 1 | 162663902 | G | G | G | G | G    | G |
| 755 | rs6244640   | 1 | 162908345 | G | G | G | G | G    | G |
| 756 | mCV27581773 | 1 | 167113019 | A | A | A | A | C    | A |
| 757 | rs3695661   | 1 | 163020090 | G | G | G | A | G    | A |
| 758 | rs3686593   | 1 | 163307274 | G | G | G | A | G    | A |
| 759 | rs4222763   | 1 | 163400150 | G | G | G | G | A    | G |
| 760 | rs4222762   | 1 | 163400188 | A | A | A | A | A    | A |
| 761 | mCV24468263 | 1 | 167261814 | C | C | C | C | A    | C |
| 762 | rs6391991   | 1 | 163872132 | A | A | A | A | NONE | A |
| 763 | rs8256585   | 1 | 164081256 | G | G | G | G | G    | G |
| 764 | rs8256589   | 1 | 164082577 | G | G | G | G | A    | A |
| 765 | rs4222766   | 1 | 164305136 | T | T | T | T | T    | T |
| 766 | rs4222765   | 1 | 164305225 | A | A | A | A | G    | A |
| 767 | rs3707322   | 1 | 164408862 | A | G | G | G | NONE | G |
| 768 | rs6161898   | 1 | 165255063 | C | C | C | C | G    | C |
| 769 | rs6159183   | 1 | 165366830 | C | C | C | C | C    | C |
| 770 | rs4222778   | 1 | 165501591 | A | A | A | A | G    | A |
| 771 | rs3090344   | 1 | 165746831 | G | G | G | G | A    | G |
| 772 | rs6412182   | 1 | 166301492 | A | A | A | A | C    | C |
| 773 | rs4222785   | 1 | 166331470 | C | C | C | C | C    | C |
| 774 | mCV22660057 | 1 | 171348718 | A | A | A | G | A    | A |
| 775 | mCV22660056 | 1 | 171349781 | A | A | A | C | A    | A |
| 776 | mCV22660046 | 1 | 171349782 | A | A | A | T | A    | A |
| 777 | mCV22660045 | 1 | 171351686 | G | A | A | G | G    | A |
| 778 | mCV22660044 | 1 | 171352242 | A | A | A | T | A    | A |
| 779 | mCV22660022 | 1 | 171352443 | G | G | G | A | G    | G |
| 780 | mCV22659835 | 1 | 171352984 | A | A | A | G | A    | A |
| 781 | rs6399765   | 1 | 167289594 | G | G | G | G | A    | G |
| 782 | rs8261392   | 1 | 167400785 | A | A | A | A | C    | A |
| 783 | rs8237094   | 1 | 167401042 | G | G | G | G | G    | G |
| 784 | rs8261408   | 1 | 167401511 | G | G | G | G | C    | G |
| 785 | rs8261478   | 1 | 167404390 | A | A | A | A | G    | A |
| 786 | mCV24414091 | 1 | 171225534 | A | A | A | A | A    | A |
| 787 | rs6224524   | 1 | 167988330 | A | A | A | A | G    | A |
| 788 | rs3714825   | 1 | 168244893 | A | A | A | C | C    | A |
| 789 | rs3676031   | 1 | 168357572 | G | G | G | A | A    | G |
| 790 | rs3699304   | 1 | 168438969 | A | A | A | G | G    | A |
| 791 | rs6404462   | 1 | 168772935 | G | G | G | G | G    | G |
| 792 | rs3720335   | 1 | 168923766 | A | A | A | G | G    | A |
| 793 | rs3657320   | 1 | 169454880 | C | C | C | A | A    | C |
| 794 | rs3088784   | 1 | 169857292 | A | G | A | A | A    | A |
| 795 | rs3712524   | 1 | 169926797 | G | G | G | A | A    | G |
| 796 | rs3719206   | 1 | 170111888 | G | G | G | A | A    | G |
| 797 | rs6347656   | 1 | 170141080 | G | G | G | A | A    | G |
| 798 | rs3090341   | 1 | 170490287 | G | G | G | A | A    | G |
| 799 | rs6353966   | 1 | 170858319 | T | T | T | T | T    | T |
| 800 | rs8242852   | 1 | 171128307 | G | A | G | A | G    | A |
| 801 | rs8237062   | 1 | 171290176 | G | A | G | G | G    | G |
| 802 | rs8237068   | 1 | 171291158 | G | G | G | G | G    | G |
| 803 | rs8258245   | 1 | 171296638 | G | G | G | A | G    | G |
| 804 | rs8242752   | 1 | 171308480 | G | G | G | G | G    | G |
| 805 | rs8238326   | 1 | 171311449 | A | A | A | A | A    | A |
| 806 | rs8245237   | 1 | 171317381 | C | C | C | G | C    | C |
| 807 | rs4222834   | 1 | 171347539 | G | G | G | G | G    | G |
| 808 | rs4222833   | 1 | 171347663 | G | G | G | G | G    | G |
| 809 | rs4222831   | 1 | 171347708 | G | G | G | G | G    | G |
| 810 | rs4222830   | 1 | 171347739 | G | G | G | A | G    | G |
| 811 | rs4222829   | 1 | 171347804 | A | A | A | T | A    | A |

|     |             |   |           |   |   |   |   |   |   |
|-----|-------------|---|-----------|---|---|---|---|---|---|
| 812 | rs4222828   | 1 | 171347834 | G | G | G | G | G | G |
| 813 | rs4222827   | 1 | 171347836 | A | A | A | A | A | A |
| 814 | rs4222837   | 1 | 171413746 | T | T | T | T | T | T |
| 815 | rs6286950   | 1 | 171451577 | C | C | C | C | C | C |
| 816 | rs3670967   | 1 | 171607279 | G | G | G | C | G | G |
| 817 | rs3089480   | 1 | 171684949 | A | A | A | G | A | A |
| 818 | rs3722740   | 1 | 171820349 | G | G | G | A | G | G |
| 819 | rs8259388   | 1 | 176180371 | A | A | A | G | A | G |
| 820 | rs8259386   | 1 | 172394048 | G | G | G | G | G | A |
| 821 | rs8259383   | 1 | 172397118 | A | A | A | A | A | A |
| 822 | rs8259381   | 1 | 172397490 | G | G | G | C | G | G |
| 823 | rs3707910   | 1 | 172614886 | A | A | A | G | A | A |
| 824 | rs6152558   | 1 | 172697377 | C | C | C | C | C | C |
| 825 | rs6154458   | 1 | 173079960 | G | G | G | G | G | G |
| 826 | rs3022869   | 1 | 173087590 | A | G | A | G | A | A |
| 827 | rs6412497   | 1 | 173119317 | G | G | G | A | G | G |
| 828 | rs3654285   | 1 | 173119613 | G | G | G | A | G | G |
| 829 | rs8242501   | 1 | 173349659 | T | T | T | T | T | T |
| 830 | rs8242504   | 1 | 173349717 | C | C | C | C | C | C |
| 831 | rs8245299   | 1 | 173350014 | A | A | A | A | A | A |
| 832 | rs8242481   | 1 | 173351118 | A | A | A | G | A | A |
| 833 | rs8245308   | 1 | 173351297 | C | C | C | C | C | C |
| 834 | rs3659655   | 1 | 173541044 | A | A | A | G | A | A |
| 835 | rs3682996   | 1 | 173874028 | G | G | G | A | G | G |
| 836 | rs3705656   | 1 | 174280751 | G | G | G | A | G | G |
| 837 | rs6220667   | 1 | 174330648 | G | G | G | G | G | G |
| 838 | rs3663380   | 1 | 174576926 | A | A | A | G | A | A |
| 839 | rs3669108   | 1 | 174667766 | C | C | C | A | C | C |
| 840 | rs2020486   | 1 | 174729572 | A | A | A | G | A | A |
| 841 | rs6375522   | 1 | 174805110 | G | G | G | A | G | G |
| 842 | rs4137914   | 1 | 174920147 | A | A | A | T | A | A |
| 843 | rs3658234   | 1 | 175197661 | G | G | G | A | G | G |
| 844 | rs6213386   | 1 | 175461915 | A | G | A | A | G | A |
| 845 | rs4136041   | 1 | 175566930 | G | G | G | A | G | G |
| 846 | rs3708441   | 1 | 175788442 | G | A | G | A | A | A |
| 847 | rs3700831   | 1 | 176145762 | G | A | G | A | A | A |
| 848 | rs6317022   | 1 | 176246857 | A | G | A | G | G | A |
| 849 | rs3723788   | 1 | 176314187 | T | T | T | A | A | T |
| 850 | rs4135465   | 1 | 176357094 | C | C | C | A | A | C |
| 851 | mCV23632994 | 1 | 180166490 | T | T | T | A | A | A |
| 852 | rs3705103   | 1 | 176539301 | C | C | C | A | A | C |
| 853 | rs3702990   | 1 | 177059830 | G | G | G | A | A | G |
| 854 | rs6308631   | 1 | 177417268 | G | G | G | G | G | G |
| 855 | rs8239104   | 1 | 177663886 | T | T | T | T | T | T |
| 856 | mCV23640374 | 1 | 182131679 | A | G | A | A | A | G |
| 857 | rs6230017   | 1 | 178206836 | A | A | A | A | A | A |
| 858 | rs3090726   | 1 | 178270623 | G | G | G | G | G | G |
| 859 | rs3022875   | 1 | 178270654 | G | G | G | G | G | G |
| 860 | rs4222855   | 1 | 178336717 | G | G | G | G | G | G |
| 861 | rs4222856   | 1 | 178336769 | G | A | G | G | G | A |
| 862 | rs4222869   | 1 | 178344148 | G | G | G | G | G | G |
| 863 | rs6371431   | 1 | 178949017 | A | A | A | A | A | A |
| 864 | rs4222874   | 1 | 179709923 | G | G | G | G | G | G |
| 865 | rs6301437   | 1 | 179841460 | A | A | A | A | A | A |
| 866 | mCV23522667 | 6 | 44456212  | G | A | G | G | A | G |
| 867 | mCV24589568 | 1 | 180036813 | A | C | A | A | A | A |
| 868 | rs3658861   | 1 | 180232508 | C | C | C | C | C | C |
| 869 | mCV23509126 | 1 | 180812801 | G | A | G | G | A | A |
| 870 | rs8265812   | 1 | 181012175 | G | A | G | G | G | G |
| 871 | rs8265821   | 1 | 181014279 | A | G | A | A | A | A |
| 872 | rs8265824   | 1 | 181015139 | A | C | A | A | A | A |
| 873 | rs4222877   | 1 | 181254659 | A | A | A | A | A | A |
| 874 | rs6308816   | 1 | 181837624 | G | G | G | G | G | G |
| 875 | rs6208459   | 1 | 182427090 | G | A | G | G | G | G |
| 876 | rs8280291   | 1 | 182554942 | A | A | A | A | A | A |
| 877 | rs8280870   | 1 | 182582402 | G | A | G | G | A | A |
| 878 | rs3725956   | 1 | 183053576 | T | A | T | A | T | A |
| 879 | rs6367740   | 1 | 183064619 | G | A | G | A | G | A |
| 880 | mCV23022620 | 1 | 187197423 | G | A | G | G | A | A |
| 881 | rs6157620   | 1 | 183197685 | A | A | A | G | G | G |
| 882 | rs3692513   | 1 | 183213015 | G | G | G | C | C | C |
| 883 | rs3693165   | 1 | 183213131 | G | G | G | A | A | A |
| 884 | rs3708652   | 1 | 183213392 | A | A | A | A | A | A |
| 885 | mCV23613178 | 1 | 187363784 | A | A | A | G | G | G |

|     |             |    |           |   |   |   |   |   |   |
|-----|-------------|----|-----------|---|---|---|---|---|---|
| 886 | rs6214478   | 1  | 183923032 | A | A | A | A | A | G |
| 887 | rs3681873   | 1  | 184081153 | A | A | A | G | A | A |
| 888 | rs4222882   | 1  | 184363490 | C | C | C | C | C | C |
| 889 | rs4222878   | 1  | 184363606 | C | C | C | C | C | C |
| 890 | rs6195541   | 1  | 184367705 | G | G | G | G | G | G |
| 891 | mCV24555989 | 1  | 184440029 | A | A | A | G | G | A |
| 892 | rs6154379   | 1  | 184815448 | A | A | A | G | A | A |
| 893 | rs6312659   | 1  | 184842516 | G | G | G | G | G | G |
| 894 | rs3674929   | 1  | 185025841 | G | G | G | A | A | G |
| 895 | rs3678066   | 1  | 185367238 | A | G | G | A | A | G |
| 896 | rs3714960   | 1  | 185576663 | G | G | G | A | G | G |
| 897 | rs3714333   | 1  | 185737175 | A | A | A | G | A | A |
| 898 | rs6202172   | 1  | 185986373 | G | G | G | G | G | G |
| 899 | mCV24542444 | 1  | 185806972 | G | A | A | A | G | A |
| 900 | mCV25202052 | 1  | 185875456 | A | G | G | G | A | G |
| 901 | rs3694793   | 1  | 186568403 | C | C | G | C | C | C |
| 902 | rs6249933   | 1  | 186761457 | G | G | G | G | G | G |
| 903 | mCV22849619 | 1  | 186531848 | G | A | G | A | G | A |
| 904 | mCV22849612 | 1  | 186532020 | C | A | C | A | C | A |
| 905 | mCV23599971 | 1  | 186816908 | G | A | G | A | G | A |
| 906 | mCV23599683 | 1  | 186822111 | A | G | A | G | A | G |
| 907 | rs6200700   | 1  | 187354320 | A | A | A | A | A | A |
| 908 | rs2228899   | 1  | 187731038 | G | G | G | G | G | G |
| 909 | rs3666905   | 1  | 187691426 | A | A | A | G | A | A |
| 910 | mCV23595105 | 1  | 187569693 | T | A | A | A | T | A |
| 911 | rs3655423   | 1  | 188171196 | G | A | A | G | A | A |
| 912 | mCV23994528 | 1  | 188019233 | C | A | A | A | C | A |
| 913 | mCV23994206 | 1  | 188025144 | G | A | A | A | G | A |
| 914 | mCV22540547 | 1  | 188034654 | A | G | G | G | A | G |
| 915 | mCV22305130 | 1  | 188045709 | A | G | G | G | A | G |
| 916 | rs3667164   | 1  | 188355284 | G | G | G | C | G | G |
| 917 | mCV23993168 | 1  | 192468118 | C | A | A | C | A | A |
| 918 | mCV23993161 | 1  | 192468287 | G | A | A | G | A | A |
| 919 | rs4222890   | 1  | 192536231 | A | A | A | A | A | A |
| 920 | rs4222892   | 1  | 188530010 | G | G | A | G | G | G |
| 921 | rs3680295   | 1  | 188570862 | G | A | A | A | A | A |
| 922 | rs6254961   | 1  | 188616412 | C | C | C | C | C | C |
| 923 | rs3654705   | 1  | 189194896 | G | G | G | G | G | C |
| 924 | rs6212571   | 1  | 189394179 | A | A | A | A | A | A |
| 925 | rs3675669   | 1  | 189671727 | G | G | G | A | G | G |
| 926 | rs3699009   | 1  | 189754789 | A | A | A | C | A | A |
| 927 | rs6175872   | 1  | 189812827 | G | G | G | G | G | G |
| 928 | mCV23587459 | 1  | 189639914 | C | A | A | C | A | C |
| 929 | mCV23586427 | 1  | 189667334 | G | A | A | A | A | G |
| 930 | rs3694932   | 1  | 189953741 | A | C | C | A | C | C |
| 931 | mCV23205157 | 1  | 189964077 | A | G | G | A | G | G |
| 932 | mCV23204820 | 1  | 189975437 | C | A | A | C | A | C |
| 933 | mCV23934092 | 1  | 189990195 | A | G | G | G | A | A |
| 934 | mCV23990401 | 1  | 190024384 | A | A | A | G | G | A |
| 935 | mCV23990376 | 1  | 190026671 | G | G | G | A | A | G |
| 936 | rs3090928   | 1  | 190426007 | A | A | A | A | A | A |
| 937 | mCV24786469 | 1  | 194384980 | G | A | A | A | G | A |
| 938 | rs4222905   | 1  | 190661345 | G | G | G | G | G | G |
| 939 | rs4222907   | 1  | 190661509 | C | C | C | C | C | C |
| 940 | rs3713460   | 1  | 190931753 | G | G | G | A | G | G |
| 941 | rs6159328   | 1  | 191184223 | G | G | G | G | G | G |
| 942 | rs6332864   | 1  | 191507310 | G | G | G | G | G | G |
| 943 | rs4222910   | 1  | 191671729 | A | A | A | A | A | A |
| 944 | rs8253327   | 1  | 191804270 | A | A | A | G | A | A |
| 945 | rs3669814   | 1  | 191804564 | C | C | C | A | C | C |
| 946 | mCV23575714 | 1  | 192157140 | G | G | G | G | A | G |
| 947 | rs3689947   | 1  | 192397145 | G | G | G | A | G | G |
| 948 | rs6186854   | 1  | 192406972 | A | A | A | A | A | A |
| 949 | rs6273007   | 1  | 192791105 | A | A | A | A | A | A |
| 950 | rs4222920   | 1  | 193166521 | A | C | C | A | C | C |
| 951 | rs6284614   | 1  | 193859684 | A | A | A | A | A | A |
| 952 | mCV23970227 | 1  | 194273895 | G | A | A | G | A | G |
| 953 | rs6247319   | 1  | 194622860 | A | A | A | A | A | A |
| 954 | rs8253280   | 1  | 194832307 | G | G | G | G | G | G |
| 955 | rs8253291   | 1  | 194853783 | G | G | G | G | G | G |
| 956 | rs6277765   | 1  | 195082858 | G | G | G | A | G | G |
| 957 | mCV24145570 | 1  | 195161421 | G | A | A | G | A | G |
| 958 | mCV23128319 | 10 | 1154911   | A | A | G | G | G | G |
| 959 | rs3715574   | 10 | 7013075   | A | A | G | G | G | G |

|      |             |    |          |   |   |   |   |      |   |
|------|-------------|----|----------|---|---|---|---|------|---|
| 960  | rs3701657   | 10 | 6494189  | A | A | G | G | G    | G |
| 961  | rs6379089   | 10 | 6441727  | C | C | C | C | C    | C |
| 962  | rs3676474   | 10 | 5923276  | A | A | A | G | G    | G |
| 963  | rs6222763   | 10 | 5716417  | A | A | A | A | A    | A |
| 964  | rs8244291   | 10 | 5639448  | G | G | G | G | G    | G |
| 965  | rs6185923   | 10 | 5384467  | A | A | A | G | A    | A |
| 966  | mCV25374719 | 10 | 8325975  | G | G | A | G | A    | G |
| 967  | rs6152477   | 10 | 4664218  | A | A | A | A | G    | G |
| 968  | rs4228079   | 10 | 4618764  | G | G | G | G | A    | A |
| 969  | rs4228085   | 10 | 4555345  | G | G | A | A | A    | A |
| 970  | rs6274838   | 10 | 4311605  | A | A | A | A | A    | A |
| 971  | rs6236943   | 10 | 3853200  | A | A | G | G | G    | G |
| 972  | rs6264790   | 10 | 3739872  | G | G | G | G | G    | G |
| 973  | rs8244279   | 10 | 3560877  | C | C | A | A | A    | A |
| 974  | rs8244274   | 10 | 3560535  | A | A | A | A | A    | A |
| 975  | rs3090968   | 10 | 3497849  | A | A | T | T | T    | T |
| 976  | rs3721803   | 10 | 3343120  | A | A | A | G | A    | A |
| 977  | mCV25163613 | 10 | 6888336  | A | C | C | C | A    | C |
| 978  | rs3695003   | 10 | 7584259  | A | A | A | A | C    | C |
| 979  | rs3684570   | 10 | 7744573  | A | A | C | C | A    | A |
| 980  | rs4228096   | 10 | 8298850  | A | A | A | A | A    | A |
| 981  | rs4228098   | 10 | 8298950  | A | A | G | A | G    | A |
| 982  | rs6281222   | 10 | 8425147  | A | A | A | A | A    | A |
| 983  | rs3697929   | 10 | 8485347  | G | G | A | A | A    | A |
| 984  | mCV25368979 | 10 | 11529641 | T | A | A | T | T    | T |
| 985  | rs3680128   | 10 | 9019231  | A | G | G | A | A    | A |
| 986  | rs3673471   | 10 | 9079808  | G | A | A | G | G    | G |
| 987  | rs3664101   | 10 | 9286770  | C | C | C | A | C    | C |
| 988  | rs3712998   | 10 | 9902073  | C | C | C | A | C    | C |
| 989  | rs3088640   | 10 | 9937074  | A | A | A | A | A    | A |
| 990  | rs3669183   | 10 | 10149498 | A | G | G | G | A    | A |
| 991  | rs3685588   | 10 | 10540887 | G | G | G | A | G    | A |
| 992  | rs3678364   | 10 | 10792434 | A | C | C | A | A    | A |
| 993  | rs6296352   | 10 | 11085789 | G | G | G | G | G    | G |
| 994  | rs3708450   | 10 | 11175767 | G | A | A | G | G    | G |
| 995  | rs3656217   | 10 | 11487786 | A | G | G | A | A    | A |
| 996  | mCV23854739 | 10 | 14703173 | A | A | A | A | C    | A |
| 997  | rs6252721   | 10 | 11876375 | A | A | A | A | A    | A |
| 998  | rs4139678   | 10 | 12000078 | G | G | G | A | G    | G |
| 999  | mCV24605795 | 10 | 15115872 | A | A | A | A | G    | A |
| 1000 | rs6196278   | 10 | 12328078 | A | G | G | A | A    | A |
| 1001 | rs3697240   | 10 | 12351098 | G | A | A | G | G    | G |
| 1002 | rs4228112   | 10 | 12719980 | A | G | G | G | A    | A |
| 1003 | rs6171150   | 10 | 12765828 | A | G | G | A | A    | A |
| 1004 | rs3668617   | 10 | 13010915 | A | A | A | G | G    | A |
| 1005 | rs3693867   | 10 | 13067549 | A | G | G | A | G    | A |
| 1006 | rs4136728   | 10 | 13337565 | A | A | A | G | A    | A |
| 1007 | rs4228116   | 10 | 13358133 | G | G | G | G | G    | G |
| 1008 | rs4228121   | 10 | 13400769 | A | A | A | A | C    | A |
| 1009 | rs3653545   | 10 | 13553669 | G | G | G | C | G    | G |
| 1010 | rs6190586   | 10 | 13879486 | G | G | G | G | A    | G |
| 1011 | rs3718959   | 10 | 14114198 | A | A | A | G | G    | A |
| 1012 | rs4228126   | 10 | 14115727 | G | G | G | A | G    | G |
| 1013 | rs4228131   | 10 | 14115863 | G | A | A | G | G    | G |
| 1014 | rs4228132   | 10 | 14115929 | A | A | A | A | A    | A |
| 1015 | rs3686911   | 10 | 14116427 | A | C | C | A | C    | A |
| 1016 | rs3680457   | 10 | 14135322 | A | G | G | A | NONE | A |
| 1017 | rs6214525   | 10 | 14447814 | G | G | G | G | G    | G |
| 1018 | mCV23053895 | 10 | 18114009 | A | T | T | A | T    | A |
| 1019 | rs6376966   | 10 | 14815556 | G | G | G | G | A    | G |
| 1020 | rs3673798   | 10 | 14886406 | C | A | A | A | C    | C |
| 1021 | rs3699409   | 10 | 15499377 | A | A | A | T | A    | A |
| 1022 | rs6270428   | 10 | 15682371 | G | G | G | G | G    | G |
| 1023 | rs6279725   | 10 | 16058353 | G | G | G | G | G    | G |
| 1024 | rs3666649   | 10 | 16210359 | A | G | G | G | G    | G |
| 1025 | rs6396621   | 10 | 16835823 | G | G | G | G | G    | G |
| 1026 | rs6378338   | 10 | 17168511 | G | A | A | A | A    | A |
| 1027 | rs4135995   | 10 | 17237149 | G | G | G | A | G    | A |
| 1028 | rs3677768   | 10 | 17330139 | C | G | G | C | G    | G |
| 1029 | rs3680292   | 10 | 17339993 | A | G | G | A | G    | G |
| 1030 | rs3712394   | 10 | 17639020 | G | G | G | A | G    | A |
| 1031 | rs3678286   | 10 | 17717136 | A | A | A | G | A    | G |
| 1032 | rs6163414   | 10 | 17791055 | A | A | A | A | A    | A |
| 1033 | rs3696055   | 10 | 17883074 | G | G | G | A | G    | A |

|      |             |    |          |   |   |   |   |   |   |
|------|-------------|----|----------|---|---|---|---|---|---|
| 1034 | rs6309008   | 10 | 18193508 | G | G | G | G | G | G |
| 1035 | rs4228139   | 10 | 18229624 | G | A | G | A | G | G |
| 1036 | rs4228142   | 10 | 18229713 | G | G | G | G | G | G |
| 1037 | rs3703211   | 10 | 18233288 | A | C | C | A | C | C |
| 1038 | rs3667141   | 10 | 18639899 | G | G | G | A | G | G |
| 1039 | rs6253577   | 10 | 19330321 | G | G | G | G | G | G |
| 1040 | rs3688363   | 10 | 19785232 | C | C | C | A | C | C |
| 1041 | rs3667453   | 10 | 19790720 | G | G | G | A | G | A |
| 1042 | rs6386111   | 10 | 19824750 | A | A | A | G | A | G |
| 1043 | rs3702675   | 10 | 20039819 | T | T | T | A | T | A |
| 1044 | rs4228152   | 10 | 20044066 | G | G | G | G | G | G |
| 1045 | rs6391056   | 10 | 20204184 | G | G | G | G | G | G |
| 1046 | rs3677302   | 10 | 20816103 | G | G | A | A | A | G |
| 1047 | rs6177920   | 10 | 20819664 | G | G | G | G | G | G |
| 1048 | rs8256431   | 10 | 20865644 | A | A | A | A | A | A |
| 1049 | rs6274648   | 10 | 21322195 | A | A | T | T | T | A |
| 1050 | rs6310100   | 10 | 21519349 | A | A | A | A | A | A |
| 1051 | rs3679120   | 10 | 22685808 | C | A | C | A | A | C |
| 1052 | rs6163568   | 10 | 22880762 | A | A | A | A | A | A |
| 1053 | rs6220110   | 10 | 23006089 | G | A | A | A | A | G |
| 1054 | rs3682303   | 10 | 23040179 | G | A | G | A | A | G |
| 1055 | rs3653750   | 10 | 23450805 | A | G | G | A | A | G |
| 1056 | rs4136532   | 10 | 23450968 | C | A | A | C | C | A |
| 1057 | rs3711723   | 10 | 24287075 | G | G | G | A | A | G |
| 1058 | rs3667888   | 10 | 24292421 | A | A | A | G | G | A |
| 1059 | rs6343370   | 10 | 24355784 | A | A | A | C | C | A |
| 1060 | rs8254420   | 10 | 24359354 | G | G | G | A | A | G |
| 1061 | rs3090587   | 10 | 24360057 | G | G | G | G | G | G |
| 1062 | rs3685111   | 10 | 24397132 | C | A | A | A | A | A |
| 1063 | rs6217650   | 10 | 24709794 | T | T | T | A | A | T |
| 1064 | rs3663890   | 10 | 24785010 | A | A | A | G | G | A |
| 1065 | rs3659676   | 10 | 25195765 | G | A | A | G | G | A |
| 1066 | rs3722105   | 10 | 25287297 | A | G | G | G | G | G |
| 1067 | rs3706825   | 10 | 25296563 | G | A | A | G | G | A |
| 1068 | rs3672342   | 10 | 25455146 | A | G | G | A | A | G |
| 1069 | rs3689005   | 10 | 25559360 | C | C | C | A | A | C |
| 1070 | mCV23525682 | 10 | 28693966 | T | T | A | T | A | A |
| 1071 | rs4228165   | 10 | 26052089 | G | G | G | G | G | G |
| 1072 | rs3663497   | 10 | 26223114 | G | G | G | A | A | G |
| 1073 | rs6221681   | 10 | 26242259 | A | A | A | G | G | A |
| 1074 | rs3666315   | 10 | 26321240 | G | G | G | C | C | G |
| 1075 | rs3661395   | 10 | 26771628 | G | G | G | A | A | G |
| 1076 | rs3719045   | 10 | 26884697 | G | G | G | A | A | G |
| 1077 | rs3705722   | 10 | 26903750 | A | A | A | C | C | A |
| 1078 | rs6396283   | 10 | 26952321 | G | G | G | A | A | G |
| 1079 | rs6167054   | 10 | 27866193 | C | C | C | C | C | C |
| 1080 | rs6391751   | 10 | 28239358 | C | C | A | C | A | A |
| 1081 | rs3023233   | 10 | 28385223 | G | G | A | G | A | A |
| 1082 | rs3089169   | 10 | 28686593 | G | G | G | G | G | G |
| 1083 | rs3704618   | 10 | 28826382 | C | C | G | C | G | G |
| 1084 | rs6244647   | 10 | 29010991 | A | A | A | A | A | A |
| 1085 | rs6226323   | 10 | 29948399 | C | C | C | C | C | C |
| 1086 | rs3088921   | 10 | 29970701 | G | G | G | G | G | G |
| 1087 | rs6281141   | 10 | 30186916 | A | A | A | A | A | A |
| 1088 | rs8244315   | 10 | 31207228 | A | A | A | A | A | A |
| 1089 | rs8244312   | 10 | 31207652 | A | A | A | A | A | A |
| 1090 | rs6280091   | 10 | 31482690 | G | G | G | G | G | G |
| 1091 | rs6283464   | 10 | 31903532 | G | G | G | G | G | G |
| 1092 | rs6311865   | 10 | 33621010 | A | A | A | A | A | A |
| 1093 | rs4228184   | 10 | 33981727 | A | A | A | A | A | A |
| 1094 | rs6364780   | 10 | 34162397 | C | C | C | C | C | C |
| 1095 | rs8244301   | 10 | 34225247 | A | A | A | A | A | A |
| 1096 | rs3703268   | 10 | 34347375 | G | G | G | G | G | G |
| 1097 | rs6227503   | 10 | 35980741 | C | C | C | C | C | C |
| 1098 | rs6329545   | 10 | 36677885 | A | A | A | A | A | A |
| 1099 | rs4228185   | 10 | 36951591 | A | A | A | A | A | A |
| 1100 | rs6396204   | 10 | 37447663 | A | A | A | A | A | A |
| 1101 | mCV25441323 | 10 | 41094472 | A | G | G | G | G | G |
| 1102 | rs6208129   | 10 | 38074094 | G | G | G | G | G | G |
| 1103 | rs6312880   | 10 | 38853590 | G | G | G | G | G | G |
| 1104 | rs6310683   | 10 | 39526423 | A | A | A | A | A | A |
| 1105 | rs6163277   | 10 | 40248528 | C | A | A | A | A | A |
| 1106 | rs3709849   | 10 | 40826428 | G | A | A | A | A | A |
| 1107 | rs6238898   | 10 | 40932769 | T | T | T | T | T | T |

|      |             |    |          |   |   |   |   |   |   |
|------|-------------|----|----------|---|---|---|---|---|---|
| 1108 | rs3700514   | 10 | 40943657 | A | G | G | G | G | G |
| 1109 | rs6243429   | 10 | 41385841 | A | A | A | A | A | A |
| 1110 | rs4228204   | 10 | 41429529 | T | T | T | T | T | T |
| 1111 | rs3699726   | 10 | 41693458 | A | T | T | T | T | T |
| 1112 | rs6285294   | 10 | 42070390 | A | G | G | G | G | G |
| 1113 | rs3716113   | 10 | 42609040 | G | A | A | A | A | A |
| 1114 | rs3722104   | 10 | 43067872 | A | G | G | G | G | G |
| 1115 | rs6230282   | 10 | 43172623 | A | A | A | A | A | A |
| 1116 | rs3686482   | 10 | 43402131 | A | G | G | G | G | G |
| 1117 | rs8256464   | 10 | 43490934 | G | G | G | G | G | G |
| 1118 | rs8244391   | 10 | 43491801 | A | A | A | A | A | A |
| 1119 | rs3706577   | 10 | 44291326 | T | A | A | A | A | A |
| 1120 | rs6196044   | 10 | 44566044 | G | A | A | A | A | A |
| 1121 | rs3655258   | 10 | 44892712 | A | G | G | G | G | G |
| 1122 | rs3661754   | 10 | 44896565 | G | A | A | A | A | A |
| 1123 | rs6391464   | 10 | 44944101 | G | A | A | A | A | A |
| 1124 | rs4228211   | 10 | 45243264 | A | A | A | A | A | A |
| 1125 | rs3090642   | 10 | 45065470 | G | G | G | G | G | G |
| 1126 | rs6339088   | 10 | 46298011 | A | A | A | A | A | A |
| 1127 | rs6247222   | 10 | 46473107 | A | A | A | A | A | A |
| 1128 | rs3677589   | 10 | 46828606 | G | G | A | G | A | G |
| 1129 | rs3676667   | 10 | 46923056 | G | G | A | G | G | G |
| 1130 | rs3679201   | 10 | 46923454 | A | A | G | A | A | A |
| 1131 | rs6335794   | 10 | 47100636 | G | G | G | G | G | G |
| 1132 | rs6325627   | 10 | 47829404 | T | T | T | T | T | T |
| 1133 | rs3715820   | 10 | 48556301 | G | G | G | G | G | G |
| 1134 | rs6382436   | 10 | 48683209 | G | A | A | A | A | A |
| 1135 | rs3720313   | 10 | 49150536 | C | C | C | C | C | C |
| 1136 | rs6409301   | 10 | 49150917 | G | G | G | G | G | G |
| 1137 | rs6298808   | 10 | 49216525 | A | A | A | A | A | A |
| 1138 | rs8244397   | 10 | 49248597 | G | G | G | G | G | G |
| 1139 | rs6187868   | 10 | 49387553 | C | C | C | C | C | C |
| 1140 | rs3687807   | 10 | 49629081 | A | A | A | A | A | A |
| 1141 | rs6205658   | 10 | 50401888 | G | G | G | G | G | G |
| 1142 | rs8244360   | 10 | 50929592 | A | A | A | A | A | A |
| 1143 | rs6200562   | 10 | 50934137 | A | A | A | A | A | A |
| 1144 | rs3656829   | 10 | 50960906 | G | G | G | G | G | G |
| 1145 | rs8244379   | 10 | 51005835 | A | A | A | A | A | A |
| 1146 | rs6272974   | 10 | 52434829 | G | G | G | G | G | G |
| 1147 | rs8244413   | 10 | 52572819 | G | G | G | G | G | G |
| 1148 | rs6270574   | 10 | 52933590 | A | A | A | A | A | A |
| 1149 | rs6375660   | 10 | 53444830 | G | G | G | G | G | G |
| 1150 | rs3696307   | 10 | 53783742 | G | G | G | C | G | G |
| 1151 | rs6242097   | 10 | 54833239 | C | C | C | C | C | C |
| 1152 | rs6190748   | 10 | 55832573 | A | A | A | A | A | A |
| 1153 | rs8244463   | 10 | 56418021 | A | A | A | A | A | A |
| 1154 | rs8260768   | 10 | 56429407 | G | G | G | G | G | G |
| 1155 | rs8237361   | 10 | 56430563 | A | A | A | A | A | A |
| 1156 | rs6315852   | 10 | 56613283 | A | A | A | A | A | A |
| 1157 | rs3682060   | 10 | 56651845 | A | A | A | A | A | A |
| 1158 | rs3676909   | 10 | 56657626 | G | G | G | G | G | G |
| 1159 | rs3089794   | 10 | 56684509 | A | A | G | A | A | A |
| 1160 | rs3090942   | 10 | 57844647 | A | A | A | A | A | A |
| 1161 | rs6231019   | 10 | 57860320 | C | C | C | C | C | C |
| 1162 | rs4228213   | 10 | 57867835 | G | G | G | G | G | G |
| 1163 | rs4228214   | 10 | 57867907 | A | A | A | A | A | A |
| 1164 | rs6378491   | 10 | 58875807 | G | G | G | G | G | G |
| 1165 | mCV24754478 | 10 | 63349704 | G | G | G | G | G | G |
| 1166 | rs8244704   | 10 | 60052653 | A | A | A | A | A | A |
| 1167 | rs4228216   | 10 | 60054367 | A | A | A | A | A | A |
| 1168 | rs6388774   | 10 | 60103839 | G | G | G | G | G | G |
| 1169 | rs3694974   | 10 | 60398058 | G | G | G | G | G | G |
| 1170 | rs6374078   | 10 | 60860895 | G | G | G | G | G | G |
| 1171 | rs4228221   | 10 | 60937390 | G | G | G | G | G | G |
| 1172 | rs8242303   | 10 | 61056038 | A | A | A | A | A | A |
| 1173 | rs8244736   | 10 | 61061975 | G | G | G | G | G | G |
| 1174 | rs8244738   | 10 | 61062324 | G | G | G | G | G | G |
| 1175 | rs8244640   | 10 | 61628370 | A | A | A | A | A | A |
| 1176 | rs8244562   | 10 | 61654983 | A | A | A | A | A | A |
| 1177 | rs6362278   | 10 | 61686016 | T | T | T | T | T | T |
| 1178 | rs8244504   | 10 | 61743733 | G | G | G | G | G | G |
| 1179 | rs6355901   | 10 | 62215934 | A | A | A | A | A | A |
| 1180 | mCV22766787 | 10 | 66337376 | A | A | A | G | A | A |
| 1181 | rs4228228   | 10 | 62573082 | G | G | G | G | G | G |



|      |             |    |          |   |     |   |   |   |   |
|------|-------------|----|----------|---|-----|---|---|---|---|
| 1182 | rs6248261   | 10 | 62727142 | A | A   | A | A | A | A |
| 1183 | rs6299108   | 10 | 64789686 | A | A   | A | A | A | A |
| 1184 | rs3089067   | 10 | 65502482 | G | G   | G | G | G | G |
| 1185 | rs6172306   | 10 | 65522957 | G | G   | G | G | G | G |
| 1186 | rs6263039   | 10 | 66214853 | C | C   | C | C | C | C |
| 1187 | rs3725117   | 10 | 66179612 | C | C   | A | C | C | C |
| 1188 | rs3723140   | 10 | 66179274 | G | G   | A | G | G | G |
| 1189 | rs6301985   | 10 | 66984495 | G | G   | G | G | G | G |
| 1190 | rs4228240   | 10 | 67314856 | A | A   | A | A | A | A |
| 1191 | rs8244660   | 10 | 67316100 | G | G   | G | G | G | G |
| 1192 | rs3712063   | 10 | 67865783 | A | A   | A | G | A | A |
| 1193 | rs3680724   | 10 | 67917504 | G | G   | G | A | G | G |
| 1194 | rs3683193   | 10 | 67966008 | A | A   | A | G | G | A |
| 1195 | rs6302539   | 10 | 68351666 | A | A   | A | A | A | A |
| 1196 | rs4228247   | 10 | 68552569 | G | G   | G | G | G | G |
| 1197 | mCV25067862 | 10 | 72556969 | G | G   | G | A | G | G |
| 1198 | rs3683124   | 10 | 68961987 | A | G   | G | G | G | G |
| 1199 | rs3679735   | 10 | 69153889 | A | T   | A | T | T | T |
| 1200 | rs3690226   | 10 | 69158406 | A | G   | A | G | G | G |
| 1201 | rs2228923   | 10 | 69184527 | G | G   | G | G | G | G |
| 1202 | rs6326263   | 10 | 69534393 | A | G   | A | G | G | G |
| 1203 | rs3654108   | 10 | 70274895 | G | G   | A | G | G | G |
| 1204 | rs3090776   | 10 | 70289786 | A | A   | A | A | A | A |
| 1205 | rs3089848   | 10 | 70398077 | G | G   | G | G | G | G |
| 1206 | rs6333189   | 10 | 70761476 | C | C   | C | C | C | C |
| 1207 | rs3681069   | 10 | 70884356 | A | A   | G | A | A | A |
| 1208 | rs6238136   | 10 | 69808403 | C | C   | C | C | C | C |
| 1209 | rs3682523   | 10 | 69818779 | A | A   | G | A | A | A |
| 1210 | rs6387158   | 10 | 71883373 | G | G   | G | G | G | G |
| 1211 | rs6226553   | 10 | 73413045 | A | A   | A | A | A | A |
| 1212 | mCV23043653 | 10 | 77742753 | A | A   | A | A | A | A |
| 1213 | rs6301951   | 10 | 73987366 | A | A   | A | A | A | A |
| 1214 | rs6409642   | 10 | 74891087 | C | C   | C | C | C | C |
| 1215 | mCV24228019 | 10 | 79395750 | G | G   | G | G | G | G |
| 1216 | rs6293552   | 10 | 75427567 | G | G   | G | G | G | G |
| 1217 | rs8274234   | 10 | 75475900 | A | A   | A | A | A | A |
| 1218 | rs8274276   | 10 | 75481250 | A | A   | A | A | A | A |
| 1219 | rs4228270   | 10 | 76580369 | A | A/G | A | A | A | A |
| 1220 | rs8236826   | 10 | 76926620 | C | C   | C | C | C | C |
| 1221 | rs8244926   | 10 | 76945378 | T | T   | T | T | T | T |
| 1222 | rs8244889   | 10 | 76949655 | A | A   | A | A | A | A |
| 1223 | rs4228279   | 10 | 77153313 | A | A   | A | A | A | A |
| 1224 | rs6400510   | 10 | 77164416 | A | A   | A | A | A | A |
| 1225 | rs4228285   | 10 | 77435327 | A | A   | A | A | A | A |
| 1226 | rs4228297   | 10 | 77606724 | A | A   | A | A | A | A |
| 1227 | rs6241143   | 10 | 78243840 | G | G   | G | G | G | G |
| 1228 | rs6315627   | 10 | 79039142 | G | G   | G | G | G | G |
| 1229 | rs4228310   | 10 | 79572648 | G | G   | G | G | G | G |
| 1230 | rs8243626   | 10 | 79601979 | G | G   | G | G | G | G |
| 1231 | rs6294842   | 10 | 79604551 | A | A   | A | A | A | A |
| 1232 | rs8243632   | 10 | 79606378 | A | A   | A | A | A | A |
| 1233 | rs8236829   | 10 | 79787139 | A | A   | A | A | A | A |
| 1234 | rs4228319   | 10 | 79847759 | A | A   | A | A | A | A |
| 1235 | rs6216433   | 10 | 79857056 | A | A   | A | A | A | A |
| 1236 | rs8236831   | 10 | 80711622 | A | A   | A | A | A | A |
| 1237 | rs8236832   | 10 | 80713709 | G | G   | G | G | G | G |
| 1238 | rs6347110   | 10 | 81249166 | A | A   | A | A | A | A |
| 1239 | rs8236836   | 10 | 81261519 | G | G   | G | G | G | G |
| 1240 | rs8236837   | 10 | 81261763 | A | A   | A | A | A | A |
| 1241 | rs3654332   | 10 | 81991031 | A | A   | A | G | A | A |
| 1242 | rs3656551   | 10 | 81994180 | A | A   | A | G | A | A |
| 1243 | rs6249559   | 10 | 82021489 | G | G   | G | A | G | G |
| 1244 | rs3667120   | 10 | 82327650 | G | G   | G | A | G | G |
| 1245 | rs3721306   | 10 | 82360108 | G | G   | G | A | G | G |
| 1246 | rs3717445   | 10 | 82649121 | G | G   | G | C | G | G |
| 1247 | rs6299415   | 10 | 82686321 | T | T   | T | A | T | T |
| 1248 | mCV24379439 | 10 | 86322095 | G | A   | A | G | G | G |
| 1249 | rs4228354   | 10 | 83257735 | G | G   | G | G | G | G |
| 1250 | rs6221047   | 10 | 83311101 | C | C   | C | C | C | C |
| 1251 | rs3661402   | 10 | 84477700 | A | A   | A | A | A | A |
| 1252 | rs6358480   | 10 | 84508765 | A | A   | A | A | A | A |
| 1253 | rs6351708   | 10 | 84586416 | A | T   | T | A | T | T |
| 1254 | rs4228360   | 10 | 84799276 | A | A   | A | A | A | A |
| 1255 | rs3689549   | 10 | 84885312 | G | A   | A | G | A | A |

|      |             |    |           |   |   |   |   |   |   |
|------|-------------|----|-----------|---|---|---|---|---|---|
| 1256 | rs3691945   | 10 | 84885647  | T | A | A | T | A | A |
| 1257 | rs3679902   | 10 | 85007769  | G | A | A | G | G | A |
| 1258 | rs8258322   | 10 | 86033270  | G | G | G | G | G | A |
| 1259 | rs8258352   | 10 | 86034550  | G | G | G | G | G | G |
| 1260 | rs8258353   | 10 | 86034834  | G | A | A | G | G | G |
| 1261 | rs6278961   | 10 | 86074333  | A | G | G | A | A | G |
| 1262 | rs8236848   | 10 | 86080254  | A | A | A | A | A | A |
| 1263 | rs8258304   | 10 | 89052392  | G | G | G | G | G | A |
| 1264 | rs8258305   | 10 | 86454468  | C | C | C | C | C | C |
| 1265 | rs8258306   | 10 | 86454516  | G | G | G | G | G | G |
| 1266 | rs8258307   | 10 | 86454760  | G | G | G | G | G | G |
| 1267 | mCV25373751 | 10 | 90475134  | A | G | G | A | G | G |
| 1268 | rs6394370   | 10 | 87251221  | A | G | G | A | A | G |
| 1269 | rs3089109   | 10 | 90111304  | C | C | C | C | C | G |
| 1270 | rs6222436   | 10 | 87905079  | A | G | G | A | G | G |
| 1271 | rs4228380   | 10 | 88423292  | G | G | G | G | G | G |
| 1272 | rs4228381   | 10 | 88423409  | A | G | G | A | G | G |
| 1273 | rs3090760   | 10 | 88866278  | A | A | A | A | A | A |
| 1274 | rs3090759   | 10 | 88866283  | G | A | G | G | G | A |
| 1275 | rs3701829   | 10 | 89091027  | A | G | G | A | A | G |
| 1276 | rs6182528   | 10 | 89109985  | G | A | A | G | G | A |
| 1277 | rs4228386   | 10 | 89213890  | A | A | A | A | A | A |
| 1278 | rs6221944   | 10 | 89413413  | A | A | A | A | C | A |
| 1279 | rs3089366   | 10 | 89439033  | G | A | A | G | G | A |
| 1280 | rs3089313   | 10 | 89536824  | A | A | G | A | G | A |
| 1281 | rs3678268   | 10 | 89809517  | A | A | G | A | G | A |
| 1282 | rs3712657   | 10 | 90682863  | G | A | A | G | A | A |
| 1283 | rs4228402   | 10 | 91437167  | G | G | G | G | G | G |
| 1284 | rs4228403   | 10 | 91437324  | A | A | A | A | A | A |
| 1285 | rs6295508   | 10 | 91665955  | A | A | A | A | A | A |
| 1286 | rs6191721   | 10 | 91687354  | A | A | A | G | A | A |
| 1287 | rs6367212   | 10 | 91860467  | G | G | G | A | G | G |
| 1288 | rs6267580   | 10 | 91881484  | G | G | G | A | G | G |
| 1289 | rs3704031   | 10 | 91965927  | G | G | G | A | G | G |
| 1290 | rs3669765   | 10 | 92140506  | A | A | A | T | A | A |
| 1291 | rs3661495   | 10 | 92425957  | A | A | A | G | A | A |
| 1292 | rs6397304   | 10 | 92744319  | A | A | A | G | A | A |
| 1293 | rs6331511   | 10 | 93028993  | G | G | G | A | G | G |
| 1294 | rs3663375   | 10 | 93088669  | G | G | G | C | G | G |
| 1295 | rs3090164   | 10 | 93223964  | G | G | G | G | G | G |
| 1296 | rs6212903   | 10 | 93270577  | G | G | G | A | G | G |
| 1297 | rs6233970   | 10 | 93629017  | C | C | C | A | C | C |
| 1298 | rs3686681   | 10 | 93822765  | A | A | A | T | A | A |
| 1299 | rs3664737   | 10 | 93866897  | A | A | A | G | A | A |
| 1300 | rs3704460   | 10 | 93868807  | A | A | A | G | A | A |
| 1301 | rs8258420   | 10 | 96525941  | A | A | A | A | A | A |
| 1302 | rs8258418   | 10 | 93919462  | G | G | G | G | G | G |
| 1303 | rs8258411   | 10 | 93919739  | G | G | G | G | G | G |
| 1304 | rs8258435   | 10 | 93920696  | G | G | G | A | G | G |
| 1305 | rs6337832   | 10 | 94513865  | C | C | C | C | C | C |
| 1306 | rs6389778   | 10 | 95081795  | G | G | G | G | G | G |
| 1307 | rs6388405   | 10 | 95877749  | A | A | A | A | A | A |
| 1308 | rs6362637   | 10 | 96986620  | T | T | T | T | T | T |
| 1309 | rs8259805   | 10 | 97390170  | A | A | A | A | A | A |
| 1310 | mCV24985767 | 10 | 100942617 | C | G | C | G | G | C |
| 1311 | rs6191187   | 10 | 97532365  | A | A | A | A | A | A |
| 1312 | rs3089906   | 10 | 98028624  | G | G | G | G | G | G |
| 1313 | rs2020560   | 10 | 98529546  | T | T | T | T | T | T |
| 1314 | rs6324242   | 10 | 98738223  | G | G | G | G | G | G |
| 1315 | rs6339227   | 10 | 98955216  | G | G | G | G | G | G |
| 1316 | rs3704401   | 10 | 99023683  | T | T | A | T | T | T |
| 1317 | rs3683912   | 10 | 99061427  | G | G | A | G | G | G |
| 1318 | rs4228447   | 10 | 99231575  | A | A | A | A | A | A |
| 1319 | rs6383172   | 10 | 99761430  | A | A | A | A | A | A |
| 1320 | rs8258500   | 10 | 99793385  | A | A | C | A | A | C |
| 1321 | rs6185093   | 10 | 100449156 | G | G | A | G | G | A |
| 1322 | mCV25004810 | 10 | 104983124 | G | A | A | G | A | G |
| 1323 | rs6349133   | 10 | 101854815 | A | A | A | A | A | A |
| 1324 | mCV24205612 | 10 | 105707311 | G | G | G | A | G | A |
| 1325 | rs6226142   | 10 | 102475171 | A | A | A | C | A | A |
| 1326 | rs6382566   | 10 | 102496550 | G | G | G | A | G | G |
| 1327 | rs3694232   | 10 | 102506199 | A | A | A | G | A | A |
| 1328 | rs3694833   | 10 | 102506283 | G | G | G | A | G | G |
| 1329 | rs3711434   | 10 | 102581113 | C | C | C | A | C | A |

|      |             |    |           |   |   |   |     |   |   |
|------|-------------|----|-----------|---|---|---|-----|---|---|
| 1330 | mCV24206699 | 10 | 106695924 | A | A | A | T   | A | A |
| 1331 | rs6246096   | 10 | 103269765 | A | A | A | G   | A | A |
| 1332 | rs6326791   | 10 | 103514385 | G | A | A | G   | A | G |
| 1333 | rs6336700   | 10 | 103818862 | A | C | G | A   | C | A |
| 1334 | rs3688351   | 10 | 104194765 | A | G | A | G   | G | A |
| 1335 | rs3716899   | 10 | 104644893 | C | A | C | A   | A | A |
| 1336 | rs6196597   | 10 | 104650349 | G | G | G | A   | G | A |
| 1337 | rs3699498   | 10 | 104945236 | C | C | A | C   | C | C |
| 1338 | rs4137343   | 10 | 105109550 | A | T | A | A   | T | A |
| 1339 | rs3716443   | 10 | 105187761 | A | G | A | A   | G | A |
| 1340 | rs6283474   | 10 | 105256777 | C | A | C | C   | A | C |
| 1341 | rs3691939   | 10 | 105878552 | G | G | G | A   | G | G |
| 1342 | rs6284148   | 10 | 106510239 | G | G | A | G   | G | A |
| 1343 | rs3089137   | 10 | 106565030 | A | A | G | A   | A | A |
| 1344 | mCV24654052 | 10 | 110149064 | C | C | C | C   | A | C |
| 1345 | rs3654717   | 10 | 106878678 | A | A | A | G   | A | G |
| 1346 | rs8258523   | 10 | 107167195 | A | A | A | A   | A | A |
| 1347 | rs8258512   | 10 | 107168257 | A | A | A | A   | A | A |
| 1348 | rs6333891   | 10 | 107462809 | C | C | C | A   | C | C |
| 1349 | rs3655255   | 10 | 107536865 | G | G | G | A   | G | G |
| 1350 | rs3697161   | 10 | 107582863 | A | A | A | G   | A | A |
| 1351 | rs6290359   | 10 | 107672808 | C | C | C | A   | C | C |
| 1352 | rs6221535   | 10 | 107689532 | C | C | C | G   | C | C |
| 1353 | rs3714942   | 10 | 107966095 | A | A | A | T   | A | A |
| 1354 | rs3725618   | 10 | 108203078 | G | G | G | A   | G | G |
| 1355 | rs3659212   | 10 | 108207109 | G | G | G | A   | G | G |
| 1356 | rs6176884   | 10 | 109430801 | T | T | T | T   | T | T |
| 1357 | rs3090205   | 10 | 110214740 | A | A | A | A   | A | A |
| 1358 | rs6353445   | 10 | 111476107 | A | A | A | A   | G | A |
| 1359 | rs6230659   | 10 | 111949585 | G | G | A | G   | G | G |
| 1360 | rs3088653   | 10 | 112074533 | A | A | A | A   | G | A |
| 1361 | rs6336042   | 10 | 113270971 | G | G | G | G   | G | G |
| 1362 | rs8248732   | 10 | 113524924 | C | C | C | C   | C | C |
| 1363 | rs8248730   | 10 | 113524992 | G | G | G | G   | G | G |
| 1364 | mCV24217147 | 10 | 117613736 | A | T | A | A   | T | A |
| 1365 | rs3680872   | 10 | 114181187 | A | G | A | G   | A | A |
| 1366 | rs8275446   | 10 | 114221912 | G | G | G | A   | G | G |
| 1367 | rs8275482   | 10 | 114275667 | G | A | G | A/G | G | G |
| 1368 | rs3698227   | 10 | 114278041 | G | A | G | A   | G | G |
| 1369 | rs3690259   | 10 | 114332741 | G | A | A | A   | G | G |
| 1370 | rs8275440   | 10 | 114343165 | A | A | A | A   | A | A |
| 1371 | rs3702621   | 10 | 114594032 | C | A | A | A   | A | A |
| 1372 | rs6201222   | 10 | 114650095 | A | A | T | T   | T | T |
| 1373 | rs3706484   | 10 | 114888970 | A | A | G | G   | A | G |
| 1374 | rs4228488   | 10 | 115159632 | G | G | G | G   | G | G |
| 1375 | rs4228484   | 10 | 115159793 | A | A | A | A   | A | A |
| 1376 | mCV25264026 | 10 | 118669410 | A | C | A | A   | C | A |
| 1377 | mCV25429984 | 10 | 119011153 | A | A | A | T   | A | A |
| 1378 | rs4228490   | 10 | 115836940 | G | G | G | G   | G | G |
| 1379 | rs4228492   | 10 | 115837144 | G | G | G | G   | G | G |
| 1380 | rs6386163   | 10 | 115923164 | G | G | G | G   | G | G |
| 1381 | rs6293295   | 10 | 116552545 | G | G | G | G   | G | G |
| 1382 | rs3670118   | 10 | 117190262 | G | G | G | A   | G | A |
| 1383 | rs6256918   | 10 | 117348939 | A | G | A | G   | G | G |
| 1384 | rs6284081   | 10 | 117927784 | A | C | A | A   | C | A |
| 1385 | rs3707488   | 10 | 117972011 | C | C | C | A   | C | A |
| 1386 | rs3657221   | 10 | 118091133 | G | A | G | A   | A | A |
| 1387 | rs6360342   | 10 | 118727864 | G | C | G | G   | C | C |
| 1388 | rs3661470   | 10 | 118877769 | G | A | G | G   | A | A |
| 1389 | rs6317716   | 10 | 119164417 | A | G | A | A   | G | G |
| 1390 | rs3659070   | 10 | 119755023 | A | G | A | A   | G | G |
| 1391 | rs3659572   | 10 | 119755089 | G | A | A | G   | A | A |
| 1392 | rs4228504   | 10 | 119772340 | A | A | A | A   | A | A |
| 1393 | rs6197175   | 10 | 120390339 | A | G | A | A   | G | A |
| 1394 | mCV24888322 | 10 | 123695257 | T | A | A | T   | T | A |
| 1395 | rs6237927   | 10 | 121114917 | G | C | G | G   | C | C |
| 1396 | rs4228517   | 10 | 124561203 | C | C | C | C   | C | C |
| 1397 | rs6197961   | 10 | 121604090 | A | G | A | A   | A | A |
| 1398 | rs3673336   | 10 | 121760044 | C | C | C | C   | C | C |
| 1399 | rs3687863   | 10 | 121963259 | A | A | G | G   | G | G |
| 1400 | rs3707479   | 10 | 122097853 | G | G | A | A   | A | A |
| 1401 | rs6243232   | 10 | 122430808 | A | A | A | A   | A | A |
| 1402 | mCV22832306 | 10 | 126086653 | G | A | A | G   | A | G |
| 1403 | rs3719419   | 10 | 122558849 | A | A | G | G   | G | G |

|      |             |    |           |   |   |   |   |   |   |
|------|-------------|----|-----------|---|---|---|---|---|---|
| 1404 | rs3700457   | 10 | 123100878 | A | G | A | A | A | A |
| 1405 | rs6282839   | 10 | 123395705 | G | C | C | G | C | C |
| 1406 | mCV22735181 | 10 | 127834096 | A | A | A | A | G | G |
| 1407 | mCV23897761 | 10 | 127985283 | C | C | C | A | A | C |
| 1408 | rs3690963   | 10 | 123937385 | G | G | A | G | A | A |
| 1409 | rs3658341   | 10 | 124265798 | A | G | G | A | A | G |
| 1410 | rs6315152   | 10 | 124423988 | G | A | A | G | G | A |
| 1411 | rs3667606   | 10 | 124582635 | C | C | G | C | C | G |
| 1412 | rs4140243   | 10 | 124619881 | A | G | G | A | A | G |
| 1413 | rs6227461   | 10 | 124638302 | A | G | G | A | A | G |
| 1414 | rs6281696   | 10 | 125373094 | A | G | G | A | G | A |
| 1415 | rs6322698   | 10 | 126355329 | G | G | G | G | G | G |
| 1416 | rs6211774   | 10 | 126454201 | G | G | G | G | G | G |
| 1417 | rs3697243   | 10 | 126634957 | G | C | G | C | C | G |
| 1418 | rs3680343   | 10 | 126709623 | A | G | A | G | G | A |
| 1419 | rs3718732   | 10 | 127276330 | T | T | T | T | T | T |
| 1420 | rs8259806   | 10 | 127481352 | G | A | A | G | G | A |
| 1421 | rs8243604   | 10 | 127482124 | G | G | G | G | G | G |
| 1422 | rs3676616   | 10 | 127579076 | G | A | A | G | G | A |
| 1423 | rs4228532   | 10 | 128255634 | C | C | C | C | C | C |
| 1424 | rs3676330   | 10 | 128337313 | A | A | A | T | T | A |
| 1425 | rs4228534   | 10 | 128337576 | A | A | A | A | A | A |
| 1426 | rs6171719   | 10 | 128562635 | A | A | A | T | T | A |
| 1427 | rs3719526   | 10 | 128579965 | G | G | G | A | A | G |
| 1428 | rs8274570   | 10 | 128685267 | C | C | C | C | C | C |
| 1429 | rs6317670   | 10 | 129535451 | G | G | G | G | G | G |
| 1430 | rs3653715   | 10 | 129573768 | G | G | C | G | G | G |
| 1431 | rs3701568   | 10 | 129611809 | A | A | G | A | A | A |
| 1432 | rs6394321   | 10 | 130060895 | A | A | A | A | A | A |
| 1433 | rs4228735   | 11 | 704       | A | A | A | A | A | A |
| 1434 | rs4228736   | 11 | 740       | A | A | A | A | A | A |
| 1435 | rs3721534   | 11 | 1792      | G | G | G | A | G | A |
| 1436 | rs6295404   | 11 | 112171619 | G | A | A | A | A | G |
| 1437 | rs6202743   | 11 | 3937845   | A | A | A | A | A | A |
| 1438 | rs3090318   | 11 | 4110196   | A | A | A | A | A | A |
| 1439 | rs6237739   | 11 | 4165808   | A | G | A | A | A | A |
| 1440 | rs3659787   | 11 | 4403518   | A | A | A | G | A | A |
| 1441 | rs3682937   | 11 | 4575120   | G | A | G | G | G | G |
| 1442 | mCV22909481 | 11 | 7280769   | T | A | T | T | T | T |
| 1443 | rs6173098   | 11 | 5328061   | A | A | A | G | G | A |
| 1444 | rs6253982   | 11 | 5424672   | C | A | A | A | A | A |
| 1445 | rs4223042   | 11 | 5529213   | G | G | G | G | G | G |
| 1446 | rs4223045   | 11 | 5529304   | A | A | A | A | A | A |
| 1447 | rs8236862   | 11 | 5764061   | A | A | A | A | A | A |
| 1448 | rs4228567   | 11 | 5765046   | G | G | G | G | G | G |
| 1449 | rs4228568   | 11 | 5765109   | G | G | G | G | G | G |
| 1450 | rs4228569   | 11 | 5765245   | A | A | A | A | A | A |
| 1451 | rs6393401   | 11 | 5765890   | G | G | G | G | G | G |
| 1452 | rs3670360   | 11 | 6148459   | A | A | G | A | A | A |
| 1453 | rs6159177   | 11 | 6311153   | A | G | G | A | A | A |
| 1454 | rs3714263   | 11 | 6483553   | G | A | A | G | G | G |
| 1455 | rs3698320   | 11 | 6856309   | A | A | C | C | C | C |
| 1456 | rs3673327   | 11 | 7360830   | G | A | A | A | A | A |
| 1457 | rs3691311   | 11 | 7400206   | A | G | A | G | G | A |
| 1458 | rs6327459   | 11 | 7733213   | G | G | G | G | G | G |
| 1459 | rs3660658   | 11 | 8158387   | A | T | T | A | A | A |
| 1460 | mCV24434350 | 11 | 10733105  | G | G | G | A | G | G |
| 1461 | rs3088673   | 11 | 8396987   | A | A | C | A | A | A |
| 1462 | rs3089123   | 11 | 8523547   | G | G | G | G | G | G |
| 1463 | rs6290313   | 11 | 8580129   | A | G | A | A | A | A |
| 1464 | rs3714397   | 11 | 8731519   | G | G | G | A | G | A |
| 1465 | rs6230380   | 11 | 8949828   | G | G | G | A | G | G |
| 1466 | rs6351798   | 11 | 8969129   | G | A | A | G | G | G |
| 1467 | rs3661631   | 11 | 9229338   | G | A | A | G | G | A |
| 1468 | rs6406927   | 11 | 9315119   | G | G | G | G | G | G |
| 1469 | rs6166904   | 11 | 9579688   | A | C | C | A | A | A |
| 1470 | rs6335368   | 11 | 9674792   | A | G | G | A | A | A |
| 1471 | rs3680429   | 11 | 9723224   | T | A | A | T | T | T |
| 1472 | rs3688266   | 11 | 9897084   | A | A | A | G | A | A |
| 1473 | rs3714537   | 11 | 9967121   | A | A | A | G | A | A |
| 1474 | rs3695907   | 11 | 10603483  | A | A | A | G | A | A |
| 1475 | mCV23851630 | 11 | 13163316  | A | G | A | A | A | A |
| 1476 | rs3023249   | 11 | 11065936  | C | C | C | A | C | C |
| 1477 | rs3023250   | 11 | 11065963  | A | A | A | G | A | A |

|      |             |    |          |   |   |   |   |   |   |
|------|-------------|----|----------|---|---|---|---|---|---|
| 1478 | rs3726213   | 11 | 11071710 | A | A | A | G | A | A |
| 1479 | rs3685735   | 11 | 11386048 | C | A | A | C | C | C |
| 1480 | mCV24455206 | 11 | 14141745 | C | A | A | C | C | A |
| 1481 | rs3659698   | 11 | 11764924 | A | G | G | G | A | G |
| 1482 | rs4228582   | 11 | 11825266 | G | G | G | G | G | G |
| 1483 | rs6185261   | 11 | 11906527 | G | A | A | G | G | A |
| 1484 | rs3674916   | 11 | 11967887 | A | A | A | G | A | G |
| 1485 | mCV22963182 | 11 | 14514503 | G | G | G | A | G | G |
| 1486 | rs3718522   | 11 | 12187272 | A | A | G | G | A | G |
| 1487 | rs3663826   | 11 | 12188090 | A | G | G | A | A | A |
| 1488 | rs6397172   | 11 | 12242841 | T | T | A | A | T | A |
| 1489 | rs3656716   | 11 | 12765831 | T | A | A | T | T | T |
| 1490 | rs6250760   | 11 | 12897492 | A | A | G | G | A | G |
| 1491 | rs3723497   | 11 | 12912745 | A | A | G | G | A | G |
| 1492 | rs3705394   | 11 | 13459831 | G | A | A | G | G | A |
| 1493 | rs3673722   | 11 | 13569212 | G | A | A | A | G | A |
| 1494 | mCV23871121 | 11 | 16324361 | A | G | A | A | A | A |
| 1495 | rs3713053   | 11 | 13825318 | G | A | A | G | G | A |
| 1496 | rs6158396   | 11 | 13985767 | A | G | A | G | A | G |
| 1497 | rs3687754   | 11 | 14262520 | C | C | G | C | C | C |
| 1498 | rs6314339   | 11 | 14305562 | A | G | G | A | A | A |
| 1499 | rs3684585   | 11 | 14455318 | T | T | T | A | T | T |
| 1500 | rs3724116   | 11 | 14607512 | C | C | A | A | C | A |
| 1501 | rs3703198   | 11 | 14898098 | A | A | A | G | A | G |
| 1502 | rs6213490   | 11 | 14917267 | A | A | A | G | A | G |
| 1503 | rs6313050   | 11 | 15647995 | A | G | A | A | A | A |
| 1504 | rs6276419   | 11 | 16145150 | G | G | G | G | G | G |
| 1505 | rs3657739   | 11 | 16502281 | C | A | C | C | C | C |
| 1506 | rs3667506   | 11 | 16759040 | A | G | G | A | A | A |
| 1507 | rs4228583   | 11 | 16770739 | A | A | A | A | A | A |
| 1508 | rs4228584   | 11 | 16770799 | G | G | G | G | G | G |
| 1509 | rs3091140   | 11 | 16807675 | G | G | G | G | G | G |
| 1510 | mCV25346958 | 11 | 12575016 | G | A | A | G | G | A |
| 1511 | rs6279977   | 11 | 16898338 | C | G | G | C | G | C |
| 1512 | rs4228590   | 11 | 17099154 | G | G | G | G | G | G |
| 1513 | rs3676204   | 11 | 17173224 | A | G | G | A | G | A |
| 1514 | rs3705582   | 11 | 17498921 | G | G | G | A | G | G |
| 1515 | rs3700313   | 11 | 17577159 | C | C | C | A | C | C |
| 1516 | rs3679497   | 11 | 17632170 | G | G | G | A | G | G |
| 1517 | rs3679597   | 11 | 17632214 | A | A | A | G | A | A |
| 1518 | rs6223549   | 11 | 17844448 | T | T | T | A | T | T |
| 1519 | rs3716790   | 11 | 17999950 | A | A | A | G | A | A |
| 1520 | rs3674910   | 11 | 18063225 | G | G | G | A | G | G |
| 1521 | rs6292290   | 11 | 18478343 | G | G | G | A | G | G |
| 1522 | rs3693118   | 11 | 18659854 | G | A | G | A | G | G |
| 1523 | rs3720687   | 11 | 18877207 | A | G | G | A | G | G |
| 1524 | rs6313528   | 11 | 18940584 | G | A | G | A | G | G |
| 1525 | rs3090214   | 11 | 19069935 | C | C | C | C | C | C |
| 1526 | rs3723987   | 11 | 19364495 | C | C | C | A | C | A |
| 1527 | rs6199297   | 11 | 19407330 | A | A | A | A | A | A |
| 1528 | rs3711924   | 11 | 19430896 | G | G | G | C | G | C |
| 1529 | rs3658216   | 11 | 19458677 | G | G | G | A | G | A |
| 1530 | rs3678321   | 11 | 19522724 | T | A | T | T | T | T |
| 1531 | rs3707185   | 11 | 19875244 | G | A | G | A | G | A |
| 1532 | rs4228593   | 11 | 20134354 | G | A | G | G | G | G |
| 1533 | rs6220017   | 11 | 20203551 | G | G | G | G | G | G |
| 1534 | rs8248101   | 11 | 20204192 | G | A | G | G | G | G |
| 1535 | rs8248143   | 11 | 20208302 | G | G | G | G | G | G |
| 1536 | rs8241442   | 11 | 20209030 | A | A | A | A | A | A |
| 1537 | rs8241443   | 11 | 20209122 | C | C | C | C | C | C |
| 1538 | rs8248200   | 11 | 20214159 | C | C | C | C | C | C |
| 1539 | rs8241436   | 11 | 20221803 | G | G | G | G | G | A |
| 1540 | rs8241679   | 11 | 20227150 | G | G | G | G | G | G |
| 1541 | rs3715577   | 11 | 20485062 | G | A | G | G | G | A |
| 1542 | rs6393028   | 11 | 20749377 | A | A | A | A | A | A |
| 1543 | rs3720127   | 11 | 20845026 | G | A | G | A | G | A |
| 1544 | rs3023251   | 11 | 20848871 | G | A | G | A | G | A |
| 1545 | rs3090219   | 11 | 21324911 | A | A | A | A | A | A |
| 1546 | mCV25386480 | 11 | 22094321 | G | G | G | G | G | G |
| 1547 | rs3679664   | 11 | 21534637 | A | A | A | A | A | A |
| 1548 | rs4135796   | 11 | 21651535 | C | G | C | G | C | C |
| 1549 | rs3683150   | 11 | 21741637 | G | A | A | A | A | G |
| 1550 | rs3708339   | 11 | 21752934 | A | G | A | G | A | A |
| 1551 | rs6204872   | 11 | 21901288 | A | A | A | A | A | A |

|      |             |    |          |   |     |   |   |   |   |
|------|-------------|----|----------|---|-----|---|---|---|---|
| 1552 | rs3661074   | 11 | 22648047 | A | A   | G | A | G | G |
| 1553 | rs4228612   | 11 | 22654812 | G | G   | G | G | G | G |
| 1554 | rs4228622   | 11 | 22732501 | C | C   | A | C | A | A |
| 1555 | rs4228626   | 11 | 22901192 | A | A   | A | A | A | A |
| 1556 | rs6376327   | 11 | 23662154 | C | C   | C | C | C | C |
| 1557 | rs3667046   | 11 | 24114875 | A | A   | A | A | A | A |
| 1558 | rs3677232   | 11 | 24568317 | G | G   | G | A | G | G |
| 1559 | rs6398304   | 11 | 24648645 | A | G   | G | A | G | A |
| 1560 | rs3726603   | 11 | 24737772 | A | G   | G | A | G | A |
| 1561 | rs3699245   | 11 | 24821753 | A | A   | A | A | A | A |
| 1562 | rs3697361   | 11 | 25077085 | A | C   | C | A | C | A |
| 1563 | rs3718784   | 11 | 25182715 | G | A   | A | G | A | G |
| 1564 | rs3727156   | 11 | 25186897 | G | A   | A | G | A | G |
| 1565 | mCV23508321 | 11 | 26181653 | A | G   | G | A | G | A |
| 1566 | rs6238406   | 11 | 25465051 | G | A   | A | G | A | G |
| 1567 | rs6367881   | 11 | 26054403 | C | A   | A | C | A | C |
| 1568 | rs4228638   | 11 | 26285280 | A | A   | A | A | A | A |
| 1569 | rs3719024   | 11 | 26366413 | G | A   | A | G | A | A |
| 1570 | rs3723990   | 11 | 26517914 | G | A   | A | A | A | A |
| 1571 | rs3090752   | 11 | 26724827 | G | A   | A | G | A | A |
| 1572 | rs3717048   | 11 | 26861268 | C | G   | G | C | G | C |
| 1573 | rs6330945   | 11 | 26890859 | A | G   | G | A | G | A |
| 1574 | rs3674800   | 11 | 27016835 | G | A   | A | G | A | G |
| 1575 | rs6266683   | 11 | 27402569 | A | G   | G | A | G | A |
| 1576 | rs3703024   | 11 | 27424886 | T | A   | A | T | A | T |
| 1577 | rs3706539   | 11 | 27480537 | G | A   | A | G | A | G |
| 1578 | rs3718803   | 11 | 28187587 | A | C   | C | A | C | C |
| 1579 | rs3706694   | 11 | 28310427 | A | G   | G | A | G | A |
| 1580 | rs6390270   | 11 | 28714278 | G | A   | A | G | A | A |
| 1581 | rs6177292   | 11 | 29026174 | C | A   | A | C | A | C |
| 1582 | rs4228640   | 11 | 29114495 | G | G   | G | G | G | G |
| 1583 | rs3720425   | 11 | 29125437 | A | A   | A | A | A | G |
| 1584 | rs3656724   | 11 | 29418060 | A | T   | T | A | T | A |
| 1585 | rs3659581   | 11 | 29615516 | A | G   | G | A | G | G |
| 1586 | rs3723433   | 11 | 29666093 | A | G   | G | A | G | A |
| 1587 | rs6412884   | 11 | 30001764 | G | G   | A | G | G | G |
| 1588 | rs3700830   | 11 | 30266839 | G | A   | G | G | A | A |
| 1589 | rs3656706   | 11 | 30499626 | G | A   | G | G | A | A |
| 1590 | rs6168508   | 11 | 30709328 | A | G   | A | A | G | G |
| 1591 | mCV23785265 | 11 | 32131213 | A | G   | A | A | G | A |
| 1592 | rs6376887   | 11 | 31757184 | G | G   | A | G | G | A |
| 1593 | rs3707274   | 11 | 31817191 | G | G   | G | G | G | G |
| 1594 | rs3656589   | 11 | 31916577 | A | A   | G | A | A | G |
| 1595 | rs3703534   | 11 | 32006575 | A | A   | G | A | A | G |
| 1596 | rs3705963   | 11 | 32036495 | A | A   | A | A | A | G |
| 1597 | rs3677196   | 11 | 32323270 | C | C   | A | C | C | C |
| 1598 | rs6205294   | 11 | 32390549 | A | A   | T | A | A | A |
| 1599 | rs3726288   | 11 | 32659564 | G | A   | G | G | A | A |
| 1600 | rs3657760   | 11 | 32856509 | A | G   | G | A | G | G |
| 1601 | rs6297874   | 11 | 32886695 | A | A   | A | A | A | G |
| 1602 | rs3723833   | 11 | 32946888 | A | A   | A | A | A | G |
| 1603 | rs4228663   | 11 | 33525841 | A | A   | A | A | A | A |
| 1604 | rs4228664   | 11 | 33525962 | G | G   | G | G | G | G |
| 1605 | rs3710499   | 11 | 33606699 | C | C   | C | C | C | C |
| 1606 | rs6201941   | 11 | 33863971 | A | A   | A | A | A | A |
| 1607 | rs6328092   | 11 | 34678802 | A | A   | A | A | A | A |
| 1608 | mCV24813109 | 11 | 27134128 | G | C   | C | G | C | G |
| 1609 | rs3673465   | 11 | 35174599 | G | A   | A | G | A | G |
| 1610 | rs3664950   | 11 | 35853924 | A | G   | G | A | G | G |
| 1611 | rs3674958   | 11 | 35994926 | A | C   | C | A | C | C |
| 1612 | rs3704943   | 11 | 36212035 | C | G   | G | C | G | G |
| 1613 | rs3720767   | 11 | 36226910 | A | G   | G | A | G | G |
| 1614 | rs6303903   | 11 | 36230987 | A | G   | G | A | G | G |
| 1615 | rs3724175   | 11 | 36317429 | A | A/G | G | A | G | G |
| 1616 | rs3662388   | 11 | 36554065 | A | A   | A | G | G | A |
| 1617 | rs3690160   | 11 | 36695995 | C | C   | C | A | C | C |
| 1618 | mCV24159035 | 11 | 35575829 | A | G   | G | A | G | A |
| 1619 | rs4139111   | 11 | 37081663 | A | A   | A | G | A | A |
| 1620 | rs3724155   | 11 | 37138788 | G | G   | G | A | G | G |
| 1621 | rs6406223   | 11 | 37451001 | A | A   | A | A | C | A |
| 1622 | rs3677530   | 11 | 37827385 | A | A   | A | C | C | A |
| 1623 | rs4139734   | 11 | 38151752 | A | A   | A | C | A | C |
| 1624 | rs6359329   | 11 | 38177953 | A | A   | A | A | G | G |
| 1625 | rs3696538   | 11 | 38488380 | C | C   | C | A | A | A |

|      |             |    |          |   |   |   |   |      |   |
|------|-------------|----|----------|---|---|---|---|------|---|
| 1626 | rs6325706   | 11 | 38589606 | G | G | G | G | A    | G |
| 1627 | rs6319607   | 11 | 38673500 | A | A | A | T | T    | T |
| 1628 | rs6189512   | 11 | 38875994 | A | A | A | G | G    | G |
| 1629 | rs3692365   | 11 | 39510070 | G | G | G | A | A    | A |
| 1630 | rs3709054   | 11 | 39724700 | A | A | A | G | G    | G |
| 1631 | rs6164170   | 11 | 39929979 | G | G | G | A | A    | A |
| 1632 | rs3665719   | 11 | 39947166 | A | A | A | G | G    | G |
| 1633 | rs6317915   | 11 | 40052999 | G | G | G | A | A    | A |
| 1634 | rs3701734   | 11 | 40967464 | G | G | G | A | A    | A |
| 1635 | rs6267987   | 11 | 40996551 | A | A | A | G | G    | G |
| 1636 | rs4228665   | 11 | 41552034 | T | T | T | T | T    | T |
| 1637 | rs3692893   | 11 | 42011558 | A | A | A | G | G    | G |
| 1638 | rs3693664   | 11 | 42011736 | C | C | C | A | C    | A |
| 1639 | rs6307831   | 11 | 42458111 | G | G | G | A | G    | G |
| 1640 | rs3718475   | 11 | 42619598 | A | A | A | G | G    | G |
| 1641 | rs3706713   | 11 | 42670361 | A | A | A | C | NONE | A |
| 1642 | rs3023336   | 11 | 43060091 | G | G | G | G | A    | A |
| 1643 | rs3023335   | 11 | 43060186 | C | C | C | C | A    | A |
| 1644 | rs3023327   | 11 | 43064921 | A | A | A | A | C    | C |
| 1645 | rs3023325   | 11 | 43065107 | G | G | G | G | A    | A |
| 1646 | rs3023324   | 11 | 43065157 | G | G | G | G | A    | A |
| 1647 | rs3023322   | 11 | 43065253 | A | A | A | A | T    | T |
| 1648 | rs3023317   | 11 | 43066477 | A | A | A | A | G    | G |
| 1649 | rs4228679   | 11 | 43360926 | C | C | C | C | C    | C |
| 1650 | rs6329109   | 11 | 43372552 | G | G | G | A | G    | G |
| 1651 | rs3676349   | 11 | 43696438 | G | G | G | A | A    | A |
| 1652 | rs3676315   | 11 | 43728382 | A | A | A | G | G    | G |
| 1653 | rs3654344   | 11 | 43847855 | C | C | C | A | A    | C |
| 1654 | rs3706346   | 11 | 44030023 | A | A | A | C | C    | C |
| 1655 | rs3090802   | 11 | 44187083 | T | T | T | T | T    | T |
| 1656 | rs6291843   | 11 | 44490256 | A | A | A | A | A    | A |
| 1657 | rs3688183   | 11 | 44745786 | A | A | A | G | A    | A |
| 1658 | mCV22950866 | 11 | 43061790 | G | G | G | G | A    | A |
| 1659 | rs2020823   | 11 | 45533876 | A | A | A | A | A    | G |
| 1660 | rs6318723   | 11 | 45562564 | A | A | A | G | G    | A |
| 1661 | rs3716545   | 11 | 45563889 | G | G | G | A | A    | A |
| 1662 | rs3717281   | 11 | 45564020 | G | G | G | A | A    | A |
| 1663 | rs3660692   | 11 | 45855756 | G | G | G | A | G    | G |
| 1664 | rs6274326   | 11 | 45887629 | G | G | G | G | G    | G |
| 1665 | rs6184392   | 11 | 46406842 | A | A | A | G | G    | G |
| 1666 | rs3697000   | 11 | 46540346 | A | A | A | G | G    | G |
| 1667 | rs4138873   | 11 | 46828694 | G | G | G | A | A    | G |
| 1668 | rs6412660   | 11 | 47007845 | G | G | G | G | G    | G |
| 1669 | rs6276177   | 11 | 47396531 | C | C | C | C | C    | C |
| 1670 | rs3090966   | 11 | 48505435 | T | T | T | T | T    | T |
| 1671 | rs6167130   | 11 | 48796514 | G | G | G | G | G    | G |
| 1672 | rs6399552   | 11 | 49276937 | A | A | A | A | A    | A |
| 1673 | rs4228692   | 11 | 49314906 | G | G | G | G | G    | G |
| 1674 | rs3692257   | 11 | 49356721 | A | A | A | A | A    | A |
| 1675 | rs3089612   | 11 | 49669452 | C | C | C | C | C    | C |
| 1676 | rs6332908   | 11 | 49719764 | C | C | C | C | C    | C |
| 1677 | rs4228697   | 11 | 49841526 | A | A | A | A | A    | A |
| 1678 | mCV24271437 | 11 | 48574138 | G | G | G | G | G    | G |
| 1679 | rs4228698   | 11 | 50710438 | C | C | C | C | C    | C |
| 1680 | rs4228707   | 11 | 51296927 | C | C | C | C | C    | C |
| 1681 | rs8243055   | 11 | 51893791 | G | G | G | G | A    | G |
| 1682 | rs8241535   | 11 | 51895629 | G | G | G | G | G    | G |
| 1683 | rs8243077   | 11 | 51896154 | T | T | T | T | A    | T |
| 1684 | rs8243006   | 11 | 51921275 | G | G | G | G | G    | G |
| 1685 | rs8243015   | 11 | 51921839 | C | C | C | C | A    | C |
| 1686 | rs8243022   | 11 | 51924320 | G | G | G | G | G    | G |
| 1687 | rs8243026   | 11 | 51924485 | A | A | A | A | A    | A |
| 1688 | rs3023259   | 11 | 52218692 | C | C | C | C | G    | C |
| 1689 | rs6327224   | 11 | 52724565 | G | G | G | G | G    | G |
| 1690 | rs8264668   | 11 | 53523429 | G | G | G | G | G    | G |
| 1691 | rs6358010   | 11 | 53585635 | A | A | A | A | G    | A |
| 1692 | mCV23125083 | 11 | 51667194 | A | A | A | A | T    | A |
| 1693 | rs4228726   | 11 | 53630655 | T | T | T | T | T    | T |
| 1694 | rs8260618   | 11 | 53631556 | A | A | A | A | G    | A |
| 1695 | rs8264464   | 11 | 53644196 | A | A | A | A | G    | A |
| 1696 | rs8264368   | 11 | 53644511 | A | A | A | A | A    | A |
| 1697 | rs8264468   | 11 | 53644899 | A | A | A | A | A    | A |
| 1698 | rs6399660   | 11 | 53706293 | A | A | A | A | A    | A |
| 1699 | rs3023258   | 11 | 53814546 | C | C | C | A | A    | C |

|      |             |    |          |   |   |   |   |   |   |
|------|-------------|----|----------|---|---|---|---|---|---|
| 1700 | rs3698063   | 11 | 53961524 | G | G | G | A | A | G |
| 1701 | rs6153538   | 11 | 54001495 | A | A | A | A | A | A |
| 1702 | rs4228727   | 11 | 54549573 | A | A | A | A | A | A |
| 1703 | rs6394459   | 11 | 54834391 | A | A | A | A | A | A |
| 1704 | rs4228731   | 11 | 55034293 | G | G | G | A | G | G |
| 1705 | rs3668680   | 11 | 55712245 | G | G | G | A | G | G |
| 1706 | rs3684076   | 11 | 56050650 | A | A | A | G | G | A |
| 1707 | rs3088940   | 11 | 56155810 | G | G | G | A | G | A |
| 1708 | rs3715495   | 11 | 56670853 | G | G | G | G | G | G |
| 1709 | rs3088624   | 11 | 56684378 | A | A | A | A | A | A |
| 1710 | rs6318831   | 11 | 56794312 | A | A | A | A | A | A |
| 1711 | rs3685511   | 11 | 56805628 | A | G | G | G | G | G |
| 1712 | rs3023260   | 11 | 56887064 | G | G | G | A | G | G |
| 1713 | rs3715214   | 11 | 57136832 | C | C | C | A | C | C |
| 1714 | rs3702614   | 11 | 57139882 | G | G | G | A | G | G |
| 1715 | rs6152357   | 11 | 57261319 | G | G | G | G | G | G |
| 1716 | rs3023265   | 11 | 57373142 | A | A | A | G | A | A |
| 1717 | rs3023263   | 11 | 57441854 | G | G | G | A | G | G |
| 1718 | rs6371333   | 11 | 57744962 | C | C | C | A | C | C |
| 1719 | rs4228762   | 11 | 57820097 | A | A | A | A | A | A |
| 1720 | rs6193359   | 11 | 57832610 | G | G | G | G | G | G |
| 1721 | rs3714321   | 11 | 58031080 | G | G | G | A | G | G |
| 1722 | rs3697686   | 11 | 58180077 | A | A | A | G | A | A |
| 1723 | rs6313602   | 11 | 58618992 | A | A | A | G | A | A |
| 1724 | rs3683066   | 11 | 58783592 | A | A | A | G | A | A |
| 1725 | rs3657266   | 11 | 58841882 | A | A | A | G | A | A |
| 1726 | rs3088586   | 11 | 59311929 | G | G | G | G | G | G |
| 1727 | rs6268685   | 11 | 59399517 | G | G | G | G | G | G |
| 1728 | rs4228772   | 11 | 59583116 | C | G | G | C | C | C |
| 1729 | rs4228773   | 11 | 59583186 | G | A | A | G | G | G |
| 1730 | rs4228790   | 11 | 60363569 | G | A | A | G | G | G |
| 1731 | rs4228797   | 11 | 60401474 | G | G | G | G | G | G |
| 1732 | rs3702556   | 11 | 60611577 | A | G | G | A | A | A |
| 1733 | rs6310839   | 11 | 60682012 | A | G | G | A | A | G |
| 1734 | rs6253450   | 11 | 60862703 | A | A | A | A | A | A |
| 1735 | rs8239366   | 11 | 60870993 | C | C | C | C | C | C |
| 1736 | rs8239354   | 11 | 60878971 | T | T | T | T | T | T |
| 1737 | rs8239353   | 11 | 60879365 | C | C | C | C | C | C |
| 1738 | rs3711357   | 11 | 61065104 | G | A | A | A | A | G |
| 1739 | rs4228814   | 11 | 61878652 | T | T | T | T | T | T |
| 1740 | rs4228813   | 11 | 61878829 | G | G | G | G | G | G |
| 1741 | rs3675335   | 11 | 62091257 | C | A | A | A | A | A |
| 1742 | rs6263230   | 11 | 62830121 | A | G | G | A | G | A |
| 1743 | rs3673863   | 11 | 62955168 | A | G | G | A | A | A |
| 1744 | rs16322     | 11 | 63624180 | C | C | C | C | C | C |
| 1745 | rs6361209   | 11 | 63640650 | A | A | A | A | A | A |
| 1746 | mCV23637656 | 11 | 59766042 | G | A | A | G | G | G |
| 1747 | rs3713702   | 11 | 63883819 | A | G | G | A | A | G |
| 1748 | rs3714311   | 11 | 63883927 | A | C | C | A | A | C |
| 1749 | rs3686912   | 11 | 63939094 | C | G | G | C | C | G |
| 1750 | mCV23561340 | 11 | 59949810 | G | A | A | G | G | G |
| 1751 | rs3656583   | 11 | 64241956 | C | G | G | C | C | C |
| 1752 | rs6283243   | 11 | 64270998 | A | G | G | A | A | A |
| 1753 | rs3722712   | 11 | 64276704 | G | A | A | G | G | G |
| 1754 | rs3695202   | 11 | 64314334 | A | G | G | G | A | A |
| 1755 | rs3698199   | 11 | 65087082 | G | A | A | A | G | G |
| 1756 | rs3088814   | 11 | 65165941 | G | G | G | G | G | G |
| 1757 | rs6361961   | 11 | 65577244 | G | G | G | G | A | A |
| 1758 | rs3663524   | 11 | 65862473 | A | G | G | G | A | A |
| 1759 | rs6350709   | 11 | 65869373 | G | A | A | A | G | G |
| 1760 | rs3714979   | 11 | 65888171 | A | G | G | G | A | A |
| 1761 | mCV24123456 | 11 | 61864452 | A | G | G | G | A | A |
| 1762 | rs6299418   | 11 | 66784499 | G | G | G | A | G | G |
| 1763 | mCV23975681 | 11 | 62517192 | A | A | A | G | A | A |
| 1764 | rs3691200   | 11 | 66889647 | A | A | A | G | A | A |
| 1765 | rs3088872   | 11 | 66933016 | A | A | A | A | A | A |
| 1766 | rs3715924   | 11 | 66991466 | G | G | A | G | A | A |
| 1767 | rs3718573   | 11 | 67150983 | G | G | A | G | A | A |
| 1768 | rs3697101   | 11 | 67375207 | C | C | C | A | C | A |
| 1769 | rs6262977   | 11 | 67504964 | A | A | G | G | G | A |
| 1770 | rs3090216   | 11 | 67669167 | A | A | A | A | A | A |
| 1771 | rs3677986   | 11 | 67760094 | G | G | C | G | C | G |
| 1772 | rs3666734   | 11 | 67763306 | A | A | A | A | A | A |
| 1773 | rs3672689   | 11 | 68546955 | A | G | G | A | G | A |



|      |             |    |          |   |   |   |     |      |   |
|------|-------------|----|----------|---|---|---|-----|------|---|
| 1774 | rs8239186   | 11 | 68702490 | G | A | A | A   | A    | A |
| 1775 | rs3658906   | 11 | 68721622 | G | A | G | A   | G    | A |
| 1776 | rs3698009   | 11 | 68830792 | A | G | G | G   | G    | G |
| 1777 | rs3696966   | 11 | 68940454 | G | G | A | A   | G    | G |
| 1778 | rs4228833   | 11 | 68954128 | C | C | C | C   | C    | C |
| 1779 | rs3668244   | 11 | 69360019 | G | G | G | A   | G    | G |
| 1780 | rs3023277   | 11 | 69701020 | A | A | A | A   | G    | A |
| 1781 | mCV23044839 | 11 | 65492498 | A | A | A | A   | G    | G |
| 1782 | rs6380524   | 11 | 70295829 | A | A | A | A   | G    | A |
| 1783 | rs4228834   | 11 | 70301319 | C | C | C | C   | C    | C |
| 1784 | rs3694522   | 11 | 70319319 | G | A | G | A   | G    | G |
| 1785 | rs4228842   | 11 | 70385221 | C | C | C | C   | C    | C |
| 1786 | rs3726991   | 11 | 70414751 | G | A | G | A   | G    | A |
| 1787 | rs3705078   | 11 | 70486760 | A | G | A | G   | A    | G |
| 1788 | rs6166031   | 11 | 70517955 | G | A | G | A   | G    | A |
| 1789 | rs3142826   | 11 | 70707486 | C | A | C | A   | C    | C |
| 1790 | rs3142842   | 11 | 70709284 | G | A | G | A   | A    | G |
| 1791 | rs3148189   | 11 | 70725501 | A | C | A | C   | A    | A |
| 1792 | rs3142817   | 11 | 70737362 | A | G | A | G   | G    | A |
| 1793 | rs6211374   | 11 | 71300721 | A | A | A | A   | NONE | A |
| 1794 | rs4228847   | 11 | 71660350 | A | A | A | A   | A    | A |
| 1795 | rs3695424   | 11 | 71949477 | A | C | C | C   | A    | C |
| 1796 | rs4228854   | 11 | 72063466 | A | A | A | A   | G    | A |
| 1797 | rs3724115   | 11 | 72373089 | T | A | A | A   | A/T  | A |
| 1798 | rs4228857   | 11 | 72627243 | C | C | C | C   | C    | C |
| 1799 | rs6335028   | 11 | 72724428 | G | A | G | A   | G    | G |
| 1800 | rs3701609   | 11 | 72876179 | G | G | G | A   | A    | A |
| 1801 | rs6353059   | 11 | 74159536 | T | T | T | A   | T    | A |
| 1802 | rs3663256   | 11 | 74284851 | G | A | G | A   | G    | A |
| 1803 | rs8239493   | 11 | 74289451 | G | G | G | G   | G    | G |
| 1804 | rs3023303   | 11 | 74320921 | A | G | A | A/G | A    | G |
| 1805 | rs3672001   | 11 | 74409366 | C | G | C | G   | C    | G |
| 1806 | mCV23528728 | 11 | 69438756 | A | A | A | G   | G    | G |
| 1807 | rs4228871   | 11 | 74441050 | G | G | G | G   | G    | G |
| 1808 | rs3679340   | 11 | 74834125 | A | G | A | G   | A    | G |
| 1809 | rs4228875   | 11 | 75022533 | A | A | A | A   | A    | A |
| 1810 | rs3091201   | 11 | 75044553 | A | A | A | A   | A    | A |
| 1811 | rs3705751   | 11 | 75319403 | G | G | G | A   | G    | A |
| 1812 | rs3700578   | 11 | 75818131 | G | G | G | A   | G    | G |
| 1813 | rs3715356   | 11 | 75849191 | G | G | G | A   | G    | G |
| 1814 | rs3700353   | 11 | 75967538 | A | A | A | G   | A    | A |
| 1815 | rs6339901   | 11 | 75968112 | G | G | G | A   | G    | G |
| 1816 | mCV24113391 | 11 | 71092401 | G | G | G | G   | A    | G |
| 1817 | rs6366450   | 11 | 76089305 | T | T | T | A   | T    | T |
| 1818 | rs8241150   | 11 | 76559188 | A | A | A | A   | A    | A |
| 1819 | rs3662476   | 11 | 76560106 | A | A | A | G   | A    | A |
| 1820 | rs8241101   | 11 | 76560705 | A | A | A | C   | A    | A |
| 1821 | rs8241202   | 11 | 76581130 | G | G | G | A   | G    | G |
| 1822 | rs8247972   | 11 | 76581781 | G | G | G | G   | G    | G |
| 1823 | rs6371313   | 11 | 77300977 | G | G | G | G   | G    | G |
| 1824 | rs4228923   | 11 | 78114515 | G | G | G | G   | G    | G |
| 1825 | rs6173406   | 11 | 78184916 | G | G | G | G   | G    | G |
| 1826 | rs3091022   | 11 | 78628505 | G | G | G | G   | G    | G |
| 1827 | rs6401371   | 11 | 79062509 | G | G | A | G   | G    | G |
| 1828 | rs6379880   | 11 | 79407138 | A | A | A | A   | A    | G |
| 1829 | rs6201655   | 11 | 79456676 | A | A | A | A   | A    | G |
| 1830 | mCV22728592 | 11 | 75211813 | G | G | G | A   | G    | A |
| 1831 | rs3688710   | 11 | 80283227 | A | A | A | A   | A    | A |
| 1832 | rs3689225   | 11 | 80283282 | A | A | A | A   | A    | A |
| 1833 | rs6382522   | 11 | 80726274 | G | G | G | G   | G    | G |
| 1834 | rs6155988   | 11 | 81422813 | A | A | A | A   | A    | A |
| 1835 | rs3088627   | 11 | 81675502 | C | C | C | C   | C    | C |
| 1836 | mCV23024199 | 11 | 77253543 | G | A | G | G   | G    | G |
| 1837 | rs4228934   | 11 | 82378874 | A | A | A | A   | A    | A |
| 1838 | rs4228935   | 11 | 82378912 | C | C | C | C   | C    | C |
| 1839 | rs3717361   | 11 | 82476096 | G | G | G | A   | A    | A |
| 1840 | rs3723910   | 11 | 82479992 | A | A | A | G   | G    | G |
| 1841 | mCV23968112 | 11 | 77684333 | G | G | G | G   | G    | G |
| 1842 | rs4228937   | 11 | 82792113 | G | G | G | G   | G    | G |
| 1843 | rs3702415   | 11 | 82905686 | G | G | G | A   | A    | A |
| 1844 | rs3689955   | 11 | 82927791 | A | A | A | T   | T    | T |
| 1845 | rs4228948   | 11 | 83507289 | A | A | A | A   | A    | A |
| 1846 | rs3658433   | 11 | 83649923 | G | G | G | A   | A    | A |
| 1847 | rs3089860   | 11 | 83784707 | G | G | G | G   | G    | G |

|      |             |    |          |      |   |   |   |   |   |
|------|-------------|----|----------|------|---|---|---|---|---|
| 1848 | rs6229186   | 11 | 83995960 | G    | G | G | A | G | A |
| 1849 | rs3686654   | 11 | 84143774 | A    | A | A | T | T | T |
| 1850 | rs3661657   | 11 | 84334033 | G    | G | G | A | A | A |
| 1851 | mCV22974307 | 11 | 87646244 | A    | A | A | G | A | A |
| 1852 | rs6365608   | 11 | 85052523 | G    | G | G | G | C | G |
| 1853 | rs3090221   | 11 | 85185238 | G    | G | G | G | A | G |
| 1854 | rs3724750   | 11 | 85271382 | C    | C | C | G | C | G |
| 1855 | rs3712644   | 11 | 85533504 | G    | G | G | C | G | C |
| 1856 | rs4228962   | 11 | 85813935 | C    | C | C | C | C | C |
| 1857 | rs4228961   | 11 | 85814048 | A    | A | A | A | A | A |
| 1858 | rs3655537   | 11 | 86362842 | A    | A | A | C | A | C |
| 1859 | rs3657136   | 11 | 86412819 | A    | A | A | G | A | G |
| 1860 | rs3719581   | 11 | 86560546 | A    | A | A | G | A | G |
| 1861 | rs4228970   | 11 | 86820819 | G    | G | G | G | G | G |
| 1862 | rs3720112   | 11 | 87456245 | G    | G | G | A | G | G |
| 1863 | rs6192689   | 11 | 87481870 | A    | A | A | G | A | A |
| 1864 | mCV22974275 | 11 | 87648649 | T    | T | T | A | T | T |
| 1865 | rs4136072   | 11 | 87702483 | G    | G | G | A | G | G |
| 1866 | rs3666396   | 11 | 87835970 | A    | A | A | C | A | A |
| 1867 | rs3677121   | 11 | 87877969 | G    | G | G | A | G | G |
| 1868 | rs3659504   | 11 | 88332743 | G    | G | G | A | G | G |
| 1869 | rs8270514   | 11 | 88596053 | C    | C | C | A | C | C |
| 1870 | rs6370920   | 11 | 88787797 | A    | A | A | G | A | A |
| 1871 | rs3687072   | 11 | 88920437 | G    | G | G | A | G | G |
| 1872 | rs3676661   | 11 | 88952583 | A    | A | A | C | A | A |
| 1873 | rs3697441   | 11 | 89211848 | A    | A | A | G | A | A |
| 1874 | rs6376709   | 11 | 89498391 | G    | G | G | A | G | G |
| 1875 | rs3653766   | 11 | 89571691 | G    | G | G | A | G | G |
| 1876 | rs3714867   | 11 | 89749152 | A    | A | A | G | A | G |
| 1877 | rs3722590   | 11 | 89778531 | G    | G | G | A | G | G |
| 1878 | rs3688955   | 11 | 90207658 | G    | G | G | A | G | A |
| 1879 | rs6408734   | 11 | 90340391 | A    | A | A | A | A | A |
| 1880 | rs6277263   | 11 | 90968105 | C    | C | C | C | C | C |
| 1881 | rs6344690   | 11 | 91620697 | C    | C | C | C | C | C |
| 1882 | rs6335262   | 11 | 92185522 | A    | G | G | G | G | G |
| 1883 | rs3714299   | 11 | 92734680 | G    | A | A | A | A | G |
| 1884 | rs3682457   | 11 | 93184699 | A    | A | A | G | G | G |
| 1885 | rs3656982   | 11 | 93326874 | T    | A | A | T | T | T |
| 1886 | mCV24677428 | 11 | 86295961 | A    | A | A | G | A | G |
| 1887 | mCV24677429 | 11 | 86296048 | G    | G | G | A | G | A |
| 1888 | mCV24677430 | 11 | 86296107 | G    | G | G | A | G | A |
| 1889 | mCV24677440 | 11 | 86296571 | G    | G | G | A | G | A |
| 1890 | mCV24677441 | 11 | 86296728 | G    | G | G | A | G | A |
| 1891 | mCV24677442 | 11 | 86298897 | G    | G | G | A | G | A |
| 1892 | mCV24677452 | 11 | 86299367 | G    | G | G | A | G | A |
| 1893 | mCV24677453 | 11 | 86299818 | A    | A | A | G | A | G |
| 1894 | mCV24677454 | 11 | 86299876 | G    | G | G | A | G | A |
| 1895 | mCV24677464 | 11 | 86300191 | T    | T | T | A | T | A |
| 1896 | mCV24677465 | 11 | 86300214 | NONE | A | A | C | A | C |
| 1897 | mCV24677466 | 11 | 86300575 | A    | A | A | G | A | G |
| 1898 | mCV24677476 | 11 | 86301027 | G    | G | G | A | G | A |
| 1899 | mCV24677761 | 11 | 86307311 | G    | G | G | A | G | A |
| 1900 | mCV24677762 | 11 | 86308545 | A    | A | A | G | A | G |
| 1901 | mCV24677763 | 11 | 86308681 | G    | G | G | A | G | A |
| 1902 | mCV24677773 | 11 | 86309336 | G    | G | G | A | G | A |
| 1903 | mCV24677774 | 11 | 86309469 | G    | G | G | A | G | A |
| 1904 | mCV24677775 | 11 | 86309540 | A    | A | A | G | A | G |
| 1905 | mCV24677797 | 11 | 86310909 | G    | G | G | A | G | A |
| 1906 | mCV24677799 | 11 | 86310994 | A    | A | A | C | A | C |
| 1907 | mCV24677809 | 11 | 86311335 | G    | G | G | A | G | A |
| 1908 | mCV24677810 | 11 | 86311420 | A    | A | A | G | A | G |
| 1909 | mCV24677811 | 11 | 86311593 | G    | G | G | A | G | A |
| 1910 | mCV24677822 | 11 | 86311878 | A    | A | A | C | A | C |
| 1911 | mCV24678093 | 11 | 86311991 | A    | A | A | T | A | T |
| 1912 | mCV24678094 | 11 | 86312021 | A    | A | A | G | A | G |
| 1913 | mCV24678095 | 11 | 86312118 | C    | C | C | A | C | A |
| 1914 | mCV24678105 | 11 | 86312160 | G    | G | G | A | G | A |
| 1915 | mCV24678106 | 11 | 86312258 | C    | C | C | A | C | A |
| 1916 | mCV24678107 | 11 | 86312642 | G    | G | G | A | G | A |
| 1917 | mCV24678118 | 11 | 86313165 | A    | A | A | T | A | T |
| 1918 | mCV24678119 | 11 | 86313357 | A    | A | A | C | A | C |
| 1919 | mCV24678129 | 11 | 86313752 | A    | A | A | G | A | G |
| 1920 | mCV24678130 | 11 | 86315199 | G    | G | G | A | G | A |
| 1921 | mCV24678131 | 11 | 86315412 | C    | C | C | A | C | A |

|      |             |    |          |   |   |   |   |   |   |
|------|-------------|----|----------|---|---|---|---|---|---|
| 1922 | mCV24678141 | 11 | 86315613 | A | A | A | T | A | T |
| 1923 | mCV24678142 | 11 | 86315821 | A | A | A | G | A | G |
| 1924 | mCV24678167 | 11 | 86316133 | A | A | A | T | A | T |
| 1925 | mCV24678439 | 11 | 86316486 | G | G | G | A | G | A |
| 1926 | mCV24678449 | 11 | 86316599 | G | G | G | A | G | A |
| 1927 | mCV24678450 | 11 | 86316628 | G | G | G | A | G | A |
| 1928 | mCV24678462 | 11 | 86318120 | A | A | A | T | A | T |
| 1929 | mCV24678473 | 11 | 86318188 | G | G | G | A | G | A |
| 1930 | mCV24678474 | 11 | 86318221 | A | A | A | G | A | G |
| 1931 | mCV24678475 | 11 | 86318505 | A | A | A | G | A | G |
| 1932 | mCV24678484 | 11 | 86318545 | A | A | A | C | A | C |
| 1933 | mCV24678485 | 11 | 86318677 | A | A | A | T | A | T |
| 1934 | mCV24678486 | 11 | 86318800 | T | T | T | A | T | A |
| 1935 | mCV24678496 | 11 | 86318996 | G | G | G | A | G | A |
| 1936 | mCV24678520 | 11 | 86320086 | A | A | A | G | A | G |
| 1937 | mCV24678521 | 11 | 86320418 | A | A | A | G | A | G |
| 1938 | mCV24678522 | 11 | 86320554 | A | A | A | G | A | G |
| 1939 | mCV24678795 | 11 | 86321117 | A | A | A | C | A | C |
| 1940 | mCV24678804 | 11 | 86321474 | G | G | G | A | G | A |
| 1941 | mCV24678805 | 11 | 86321770 | G | G | G | A | G | A |
| 1942 | mCV24678816 | 11 | 86322314 | G | G | G | G | G | G |
| 1943 | mCV24678817 | 11 | 93337739 | G | G | G | A | G | A |
| 1944 | mCV24678828 | 11 | 86322889 | C | C | C | A | C | A |
| 1945 | mCV24678829 | 11 | 86325017 | A | A | A | G | A | G |
| 1946 | mCV24678840 | 11 | 86325161 | A | A | A | G | A | G |
| 1947 | mCV24678841 | 11 | 86325203 | A | A | A | G | A | G |
| 1948 | mCV24678842 | 11 | 86326062 | C | C | C | G | C | G |
| 1949 | mCV24678852 | 11 | 86326113 | G | G | G | A | G | A |
| 1950 | mCV24678853 | 11 | 86326269 | G | G | G | A | G | A |
| 1951 | mCV24678864 | 11 | 86326460 | A | A | A | G | A | G |
| 1952 | mCV24678865 | 11 | 86326688 | C | C | C | A | C | A |
| 1953 | rs6316145   | 11 | 93432418 | G | A | A | G | G | G |
| 1954 | mCV24678866 | 11 | 86328403 | A | A | A | T | A | T |
| 1955 | mCV24679137 | 11 | 86328547 | G | G | G | G | G | G |
| 1956 | mCV24679139 | 11 | 86329515 | A | A | A | A | A | A |
| 1957 | mCV24679150 | 11 | 86331271 | A | A | A | G | A | G |
| 1958 | mCV24679151 | 11 | 86331562 | A | A | A | G | A | G |
| 1959 | mCV24679162 | 11 | 86331664 | A | A | A | C | A | C |
| 1960 | mCV24679163 | 11 | 86331801 | C | C | C | A | C | A |
| 1961 | mCV24679164 | 11 | 86331802 | C | C | C | C | C | C |
| 1962 | rs6378431   | 11 | 93453785 | G | A | A | G | G | G |
| 1963 | rs3023312   | 11 | 93969968 | G | A | A | G | G | G |
| 1964 | rs3088501   | 11 | 94001578 | G | A | A | A | A | G |
| 1965 | rs6209951   | 11 | 94071646 | T | A | A | T | T | T |
| 1966 | rs4228987   | 11 | 94237500 | G | G | G | G | G | G |
| 1967 | rs3671548   | 11 | 94237576 | C | A | A | C | C | C |
| 1968 | rs4228988   | 11 | 94237615 | G | G | G | G | G | G |
| 1969 | rs3716598   | 11 | 94273810 | G | G | G | A | A | G |
| 1970 | rs3711235   | 11 | 94607639 | T | A | A | T | T | T |
| 1971 | rs4229003   | 11 | 94696205 | G | A | A | G | G | G |
| 1972 | rs4229012   | 11 | 94939964 | G | A | A | G | G | G |
| 1973 | rs4229020   | 11 | 94940198 | A | A | A | A | A | A |
| 1974 | rs3090050   | 11 | 95024664 | G | A | A | G | G | G |
| 1975 | rs6238153   | 11 | 95025231 | A | G | G | A | A | A |
| 1976 | rs3684399   | 11 | 95395305 | G | A | A | G | G | G |
| 1977 | rs3684436   | 11 | 95395327 | G | A | A | G | G | G |
| 1978 | rs4229023   | 11 | 95516309 | C | C | C | C | G | C |
| 1979 | rs6247550   | 11 | 95719913 | A | G | G | A | A | A |
| 1980 | rs3708716   | 11 | 95769909 | G | A | A | G | G | G |
| 1981 | rs3091065   | 11 | 95961280 | A | A | A | A | A | A |
| 1982 | rs4229033   | 11 | 95977357 | G | G | G | G | G | G |
| 1983 | rs3710148   | 11 | 96196554 | A | A | A | A | G | A |
| 1984 | rs6298456   | 11 | 96212076 | G | C | C | G | C | G |
| 1985 | rs3708840   | 11 | 96632720 | A | A | A | G | A | G |
| 1986 | rs8270318   | 11 | 96877104 | G | G | G | G | G | G |
| 1987 | rs8270290   | 11 | 96883020 | A | G | A | A | A | G |
| 1988 | rs8270303   | 11 | 96884884 | A | G | A | A | A | G |
| 1989 | rs8270256   | 11 | 96886865 | G | A | G | G | G | A |
| 1990 | rs8236884   | 11 | 96911765 | G | A | G | G | G | A |
| 1991 | rs8270199   | 11 | 96912774 | A | G | A | A | A | G |
| 1992 | rs8236885   | 11 | 96916153 | A | C | A | A | A | C |
| 1993 | rs8270183   | 11 | 96929404 | G | G | G | G | G | G |
| 1994 | mCV22876119 | 11 | 90086233 | G | G | G | A | G | A |
| 1995 | rs6169425   | 11 | 97437210 | A | G | A | A | A | G |

|      |             |    |           |   |      |   |   |   |   |
|------|-------------|----|-----------|---|------|---|---|---|---|
| 1996 | rs6236574   | 11 | 97780069  | G | A    | G | A | G | G |
| 1997 | rs3682334   | 11 | 97799411  | A | G    | A | G | A | A |
| 1998 | rs3686162   | 11 | 97814884  | A | T    | A | T | A | A |
| 1999 | rs4229050   | 11 | 98028564  | C | C    | C | C | C | C |
| 2000 | rs4229059   | 11 | 98477100  | A | A    | A | A | A | A |
| 2001 | rs4229063   | 11 | 98477252  | C | C    | C | C | C | C |
| 2002 | rs4229073   | 11 | 98581928  | A | A    | A | A | A | A |
| 2003 | rs3661058   | 11 | 98590564  | G | A    | G | A | G | G |
| 2004 | rs3700197   | 11 | 98670622  | G | A    | G | A | G | G |
| 2005 | rs4229084   | 11 | 98737306  | G | G    | G | G | G | G |
| 2006 | rs6255749   | 11 | 98740111  | A | A    | A | A | A | A |
| 2007 | rs3023315   | 11 | 99179949  | G | G    | G | C | G | G |
| 2008 | rs4229088   | 11 | 99251260  | G | NONE | G | A | G | G |
| 2009 | rs17537     | 11 | 99401164  | A | A    | A | A | A | A |
| 2010 | rs3090212   | 11 | 99721952  | A | G    | A | A | A | A |
| 2011 | rs8243562   | 11 | 99875155  | G | G    | G | G | G | G |
| 2012 | rs8243536   | 11 | 99919048  | G | G    | G | G | G | G |
| 2013 | rs6272953   | 11 | 100060831 | A | G    | A | A | A | A |
| 2014 | rs4229090   | 11 | 100128925 | G | G    | G | G | G | G |
| 2015 | rs6212976   | 11 | 100345749 | G | G    | G | G | G | G |
| 2016 | rs3090971   | 11 | 100548067 | A | A    | A | A | A | A |
| 2017 | rs3695865   | 11 | 101350115 | G | G    | G | A | G | A |
| 2018 | rs3722448   | 11 | 101523337 | A | G    | A | G | A | G |
| 2019 | rs3091185   | 11 | 101549493 | A | A    | A | A | A | A |
| 2020 | rs6163209   | 11 | 101629465 | A | T    | A | A | A | A |
| 2021 | rs3653651   | 11 | 101817813 | A | G    | A | G | A | G |
| 2022 | rs4229101   | 11 | 101820035 | A | G    | A | G | A | G |
| 2023 | rs8265648   | 11 | 102021171 | G | G    | G | G | G | G |
| 2024 | rs8265649   | 11 | 102022466 | A | A    | A | A | A | A |
| 2025 | rs8265669   | 11 | 102024409 | G | G    | G | G | G | G |
| 2026 | rs6255041   | 11 | 102024867 | G | G    | G | G | G | G |
| 2027 | rs6269080   | 11 | 102025203 | A | A    | A | A | A | A |
| 2028 | rs8265673   | 11 | 102027703 | G | A    | G | G | G | G |
| 2029 | rs8265690   | 11 | 102031425 | A | G    | A | A | A | A |
| 2030 | rs8265701   | 11 | 102032051 | G | A    | G | G | G | G |
| 2031 | rs4229109   | 11 | 102124390 | A | A    | A | A | A | A |
| 2032 | rs4137882   | 11 | 102249410 | G | C    | G | C | G | C |
| 2033 | rs3685813   | 11 | 102465591 | C | G    | C | G | C | G |
| 2034 | rs3709793   | 11 | 102581561 | A | A    | A | G | A | G |
| 2035 | rs6180460   | 11 | 102625210 | G | G    | G | G | G | G |
| 2036 | rs4229111   | 11 | 102643325 | A | T    | A | A | A | A |
| 2037 | rs6333045   | 11 | 103179106 | A | G    | A | A | A | G |
| 2038 | rs6393948   | 11 | 103272243 | A | G    | A | A | A | G |
| 2039 | rs3690511   | 11 | 103388619 | A | G    | A | G | A | G |
| 2040 | rs4229114   | 11 | 103609008 | G | G    | G | G | G | G |
| 2041 | rs3723163   | 11 | 103650773 | A | A    | A | G | A | G |
| 2042 | rs3680754   | 11 | 103682192 | C | C    | C | A | C | C |
| 2043 | rs3708643   | 11 | 103798635 | A | G    | A | A | A | G |
| 2044 | rs3722158   | 11 | 104069759 | A | C    | A | C | A | C |
| 2045 | rs3721088   | 11 | 104175231 | A | G    | A | G | A | G |
| 2046 | rs4139506   | 11 | 104188708 | A | G    | A | G | A | A |
| 2047 | rs3658778   | 11 | 104699568 | A | C    | A | C | A | A |
| 2048 | rs3698446   | 11 | 104908478 | G | A    | G | A | G | G |
| 2049 | rs3699664   | 11 | 104908698 | A | A    | A | A | A | A |
| 2050 | rs4229123   | 11 | 105072820 | A | A    | A | A | A | A |
| 2051 | rs4229124   | 11 | 105072879 | C | C    | C | C | C | C |
| 2052 | rs6358392   | 11 | 105203763 | A | A    | A | A | A | A |
| 2053 | rs3724864   | 11 | 105496926 | A | A    | A | G | A | A |
| 2054 | rs3686516   | 11 | 105715539 | A | A    | A | C | A | A |
| 2055 | rs6192754   | 11 | 105891591 | G | G    | G | G | G | G |
| 2056 | rs4229126   | 11 | 106173676 | A | A    | A | A | A | A |
| 2057 | rs4229128   | 11 | 106173946 | G | G    | G | G | G | G |
| 2058 | rs4229153   | 11 | 106489617 | A | A    | A | A | A | A |
| 2059 | rs4229158   | 11 | 106489802 | A | A    | A | A | A | A |
| 2060 | mCV25445390 | 11 | 97297201  | G | A    | G | G | G | A |
| 2061 | rs3705163   | 11 | 106563339 | A | A    | A | C | A | A |
| 2062 | rs6386362   | 11 | 106649550 | G | G    | G | A | G | G |
| 2063 | rs3700560   | 11 | 107304711 | G | A    | A | A | A | A |
| 2064 | rs3089281   | 11 | 107374537 | G | G    | G | G | G | G |
| 2065 | rs3704454   | 11 | 107445540 | A | G    | G | A | G | G |
| 2066 | rs3670642   | 11 | 107589920 | G | A    | A | G | A | A |
| 2067 | rs3669823   | 11 | 107635521 | G | G    | G | A | G | G |
| 2068 | rs3720981   | 11 | 108308030 | A | A    | A | G | A | A |
| 2069 | rs6152151   | 11 | 108327864 | G | G    | G | G | G | G |

|      |             |    |           |   |   |   |   |   |   |
|------|-------------|----|-----------|---|---|---|---|---|---|
| 2070 | rs3707743   | 11 | 108560503 | A | A | A | G | A | A |
| 2071 | mCV25379202 | 11 | 99112042  | G | A | G | A | G | G |
| 2072 | rs3683086   | 11 | 109004052 | A | A | A | G | A | A |
| 2073 | rs6370458   | 11 | 109065922 | A | A | A | G | A | A |
| 2074 | rs4229173   | 11 | 109343954 | G | G | G | G | G | G |
| 2075 | rs4229174   | 11 | 109344088 | A | A | A | A | A | A |
| 2076 | mCV22971719 | 11 | 100922003 | A | A | A | G | A | G |
| 2077 | rs3690064   | 11 | 109901626 | G | G | A | A | A | G |
| 2078 | rs3661749   | 11 | 109913912 | A | A | G | A | G | A |
| 2079 | rs6305694   | 11 | 109914476 | G | G | A | A | A | G |
| 2080 | rs4229189   | 11 | 110699182 | A | A | A | A | A | G |
| 2081 | rs3659410   | 11 | 111150576 | A | A | G | G | G | G |
| 2082 | rs6335078   | 11 | 111412690 | A | A | G | G | G | G |
| 2083 | rs3672597   | 11 | 111905327 | G | G | G | A | A | G |
| 2084 | rs3658195   | 11 | 111966481 | G | G | G | A | A | A |
| 2085 | rs3687980   | 11 | 112026795 | G | A | A | A | A | G |
| 2086 | rs3682143   | 11 | 112397417 | C | A | A | C | C | C |
| 2087 | rs3697369   | 11 | 112397544 | G | A | A | G | G | G |
| 2088 | rs6280443   | 11 | 112660932 | T | A | A | T | T | T |
| 2089 | rs6407460   | 11 | 113060943 | G | G | G | A | A | G |
| 2090 | rs3699056   | 11 | 113674817 | G | G | G | A | A | G |
| 2091 | rs3693846   | 11 | 113680576 | T | T | T | A | A | T |
| 2092 | rs3708239   | 11 | 114313230 | G | A | A | A | A | G |
| 2093 | rs4135850   | 11 | 114347919 | G | A | A | G | A | G |
| 2094 | rs6354903   | 11 | 114451457 | C | C | C | C | A | A |
| 2095 | rs6349487   | 11 | 114567190 | A | G | G | A | A | A |
| 2096 | rs3712667   | 11 | 114830840 | A | G | G | A | A | A |
| 2097 | rs3662930   | 11 | 115193172 | G | A | A | A | G | A |
| 2098 | rs6364987   | 11 | 115720616 | A | G | G | A | A | A |
| 2099 | rs3707957   | 11 | 115782928 | A | G | G | A | A | A |
| 2100 | rs3707906   | 11 | 115805492 | C | G | G | C | G | C |
| 2101 | rs3688691   | 11 | 116300204 | G | G | G | A | G | G |
| 2102 | rs6230748   | 11 | 116341699 | G | G | G | A | A | G |
| 2103 | rs3703110   | 11 | 116355859 | G | G | G | A | A | G |
| 2104 | rs6271461   | 11 | 117263112 | A | A | A | A | A | A |
| 2105 | rs3661724   | 11 | 117356846 | A | A | A | G | A | G |
| 2106 | rs3678982   | 11 | 117532598 | A | A | A | C | A | C |
| 2107 | rs3721943   | 11 | 118015080 | A | A | A | G | A | A |
| 2108 | rs3697076   | 11 | 118049242 | C | C | C | A | C | C |
| 2109 | rs6377381   | 11 | 118322709 | T | T | T | T | T | T |
| 2110 | rs6331863   | 11 | 118577592 | G | G | G | G | G | G |
| 2111 | rs8243512   | 11 | 119214035 | A | A | A | A | A | A |
| 2112 | rs8243507   | 11 | 119215074 | A | A | G | A | G | G |
| 2113 | rs8243495   | 11 | 119219809 | A | A | G | A | G | G |
| 2114 | rs4229215   | 11 | 119281012 | C | C | G | C | G | G |
| 2115 | rs4229217   | 11 | 119281160 | A | A | A | A | A | A |
| 2116 | rs6346368   | 11 | 119706533 | G | G | A | G | A | G |
| 2117 | rs6192404   | 11 | 119836113 | A | A | G | A | G | G |
| 2118 | rs4229221   | 11 | 120632796 | G | G | G | G | G | G |
| 2119 | rs3712881   | 11 | 120738678 | G | G | G | G | G | A |
| 2120 | rs6322554   | 11 | 120835832 | C | C | C | C | C | C |
| 2121 | rs3712388   | 11 | 120918323 | G | A | A | A | A | A |
| 2122 | rs6192174   | 11 | 120959942 | A | G | G | G | G | G |
| 2123 | rs3693796   | 11 | 121485409 | G | A | A | A | A | G |
| 2124 | mCV22625013 | 11 | 114220237 | G | A | A | G | G | G |
| 2125 | rs6198851   | 12 | 3686182   | G | A | A | A | A | A |
| 2126 | rs6369108   | 12 | 3753145   | G | G | G | G | G | G |
| 2127 | rs4229224   | 12 | 3825365   | C | C | C | C | C | C |
| 2128 | rs3699421   | 12 | 3922406   | G | G | A | G | G | G |
| 2129 | rs3699525   | 12 | 3922447   | A | A | C | A | A | A |
| 2130 | rs6246656   | 12 | 4009306   | A | A | A | A | A | A |
| 2131 | rs4229230   | 12 | 4588718   | G | G | G | G | G | G |
| 2132 | rs4229232   | 12 | 4588848   | A | A | A | A | A | A |
| 2133 | rs4229234   | 12 | 4935717   | A | A | A | A | A | A |
| 2134 | rs3653990   | 12 | 5131626   | G | G | A | G | G | G |
| 2135 | rs6308052   | 12 | 5186221   | A | A | A | A | A | A |
| 2136 | rs3676815   | 12 | 5280179   | A | G | A | A | A | A |
| 2137 | rs4229239   | 12 | 5303857   | A | A | A | A | A | A |
| 2138 | rs6278204   | 12 | 5982290   | C | C | G | C | C | C |
| 2139 | rs4138084   | 12 | 6177730   | A | A | C | A | A | A |
| 2140 | rs6283105   | 12 | 6964499   | G | G | G | G | G | G |
| 2141 | rs4217527   | 12 | 7360628   | C | A | C | C | C | C |
| 2142 | rs3678128   | 12 | 7371530   | C | A | A | C | C | C |
| 2143 | rs6370381   | 12 | 7437227   | C | A | A | C | C | C |

|      |             |    |          |   |   |   |     |      |   |
|------|-------------|----|----------|---|---|---|-----|------|---|
| 2144 | rs3680632   | 12 | 8342543  | A | G | A | A   | A    | A |
| 2145 | rs8243609   | 12 | 8807777  | G | G | G | G   | G    | G |
| 2146 | rs8259864   | 12 | 8809713  | A | A | A | A   | A    | A |
| 2147 | rs3089046   | 12 | 9007288  | G | G | G | G   | G    | G |
| 2148 | mCV23300324 | 12 | 11987108 | A | A | A | C   | C    | A |
| 2149 | rs6176675   | 12 | 9248169  | A | C | A | A   | A    | A |
| 2150 | rs3717661   | 12 | 9585058  | C | C | C | G   | G    | C |
| 2151 | rs6389512   | 12 | 9607391  | G | G | G | A   | A    | G |
| 2152 | rs3708337   | 12 | 9687168  | G | G | G | A   | A    | G |
| 2153 | rs3709002   | 12 | 9687267  | T | A | T | A   | A    | T |
| 2154 | rs3688676   | 12 | 10301624 | C | C | C | G   | C    | C |
| 2155 | rs3090664   | 12 | 10432887 | A | A | A | G   | A    | A |
| 2156 | rs6169448   | 12 | 10454406 | T | T | T | A   | T    | T |
| 2157 | rs4229244   | 12 | 10485656 | A | A | A | A   | A    | A |
| 2158 | rs4229245   | 12 | 10485704 | T | T | T | T   | T    | T |
| 2159 | rs4229247   | 12 | 10485803 | T | T | T | T   | T    | T |
| 2160 | rs3665012   | 12 | 10622266 | A | A | A | C   | A    | A |
| 2161 | rs3707458   | 12 | 10627537 | G | G | G | A   | G    | G |
| 2162 | rs3708624   | 12 | 10627687 | G | G | G | C   | G    | G |
| 2163 | rs6209157   | 12 | 10664050 | C | C | C | A   | A    | C |
| 2164 | rs3717933   | 12 | 11197043 | G | G | G | A   | G    | G |
| 2165 | rs3689412   | 12 | 11257698 | A | A | G | G   | A    | G |
| 2166 | rs6197264   | 12 | 11354427 | A | C | A | A   | A    | A |
| 2167 | rs3695968   | 12 | 11918334 | T | A | A | T   | A    | A |
| 2168 | rs3718992   | 12 | 12114801 | A | G | A | G   | A    | A |
| 2169 | rs3090132   | 12 | 12260007 | A | C | A | C   | A    | A |
| 2170 | rs3725027   | 12 | 12296917 | G | G | A | A   | G    | A |
| 2171 | rs3693390   | 12 | 12630509 | G | G | A | G   | A    | A |
| 2172 | rs6271997   | 12 | 12631788 | G | C | C | G   | C    | C |
| 2173 | rs6254898   | 12 | 12820070 | A | G | A | A   | A    | A |
| 2174 | rs3090234   | 12 | 13120082 | C | C | C | C   | C    | C |
| 2175 | rs3692433   | 12 | 13244341 | G | A | G | G   | G    | G |
| 2176 | rs3715715   | 12 | 13280695 | A | G | A | G   | A    | A |
| 2177 | rs4229249   | 12 | 13345894 | G | G | G | G   | G    | G |
| 2178 | rs3655057   | 12 | 13507742 | A | A | G | G   | G    | G |
| 2179 | rs3088558   | 12 | 13622262 | A | A | A | A   | A    | A |
| 2180 | rs6186506   | 12 | 13748340 | G | A | G | G   | G    | G |
| 2181 | rs3716261   | 12 | 13997370 | A | G | A | A   | A    | A |
| 2182 | rs6277726   | 12 | 14270128 | A | A | A | A   | A    | A |
| 2183 | rs3653621   | 12 | 14316714 | G | G | A | A   | A    | A |
| 2184 | rs3662757   | 12 | 14382136 | A | A | A | G   | G    | G |
| 2185 | rs6403731   | 12 | 15047192 | A | G | A | A   | A    | A |
| 2186 | rs6235226   | 12 | 15177221 | G | G | A | A   | A    | A |
| 2187 | rs3696623   | 12 | 15276918 | A | A | G | G   | G    | G |
| 2188 | rs3712011   | 12 | 15661214 | C | A | C | A   | A    | C |
| 2189 | rs3715137   | 12 | 15661664 | G | A | G | A   | A    | G |
| 2190 | rs3657682   | 12 | 15855810 | A | C | A | C   | A    | A |
| 2191 | mCV24328836 | 12 | 16297134 | C | A | C | A   | C    | C |
| 2192 | rs3658504   | 12 | 16292652 | A | A | A | G   | A    | A |
| 2193 | rs6376853   | 12 | 16420934 | A | A | A | G   | A    | A |
| 2194 | rs6292712   | 12 | 16437176 | A | A | A | G   | A    | A |
| 2195 | rs3706330   | 12 | 16713381 | G | G | A | A   | A    | G |
| 2196 | rs3694821   | 12 | 16716565 | A | A | A | G   | A    | A |
| 2197 | rs3701159   | 12 | 16862980 | A | G | G | A   | A    | A |
| 2198 | rs6180964   | 12 | 16960089 | G | G | G | A   | A    | G |
| 2199 | mCV24339635 | 12 | 17249793 | C | C | C | A   | NONE | C |
| 2200 | rs3665211   | 12 | 17001811 | T | T | T | A   | T    | T |
| 2201 | rs6163686   | 12 | 17301280 | C | C | C | G   | C    | C |
| 2202 | rs3667752   | 12 | 17608958 | A | A | A | G   | A    | A |
| 2203 | rs6375532   | 12 | 3070988  | C | C | C | G   | C    | C |
| 2204 | rs4229258   | 12 | 1413031  | G | G | G | A   | G    | G |
| 2205 | rs4229250   | 12 | 1412792  | A | A | A | A/C | A    | A |
| 2206 | rs3667585   | 12 | 1490933  | C | C | C | G   | C    | C |
| 2207 | rs3717860   | 12 | 19689285 | A | A | A | C   | A    | A |
| 2208 | rs3655651   | 12 | 19733458 | A | A | A | G   | A    | A |
| 2209 | rs3023339   | 12 | 19765125 | C | C | C | A   | C    | C |
| 2210 | rs6183596   | 12 | 19790476 | C | C | C | C   | C    | C |
| 2211 | rs4229275   | 12 | 20022319 | G | G | G | G   | G    | G |
| 2212 | rs4229284   | 12 | 20058227 | C | C | C | A   | C    | C |
| 2213 | rs3719944   | 12 | 20284893 | G | G | G | G   | G    | G |
| 2214 | rs6221035   | 12 | 20786909 | G | G | G | G   | G    | G |
| 2215 | mCV25284008 | 5  | 12135883 | C | A | A | C   | A    | A |
| 2216 | rs6328018   | 12 | 21090189 | A | G | A | A   | A    | A |
| 2217 | rs4229294   | 12 | 21263775 | C | C | C | A   | C    | C |

|      |             |    |          |   |   |   |   |   |   |
|------|-------------|----|----------|---|---|---|---|---|---|
| 2218 | rs3710723   | 12 | 21279851 | G | G | G | A | G | G |
| 2219 | rs6401555   | 12 | 21400794 | A | A | A | T | T | A |
| 2220 | rs6271290   | 12 | 21531861 | T | T | T | T | T | T |
| 2221 | mCV23582150 | 5  | 12883363 | G | A | A | G | A | A |
| 2222 | rs3666132   | 12 | 22018908 | C | C | C | A | C | C |
| 2223 | rs3705249   | 12 | 22027283 | G | G | G | A | G | G |
| 2224 | rs3694635   | 12 | 22209879 | A | A | A | G | A | A |
| 2225 | rs3713853   | 12 | 22276217 | G | G | G | A | G | G |
| 2226 | rs3684699   | 12 | 22491531 | C | C | C | A | C | C |
| 2227 | mCV22670586 | 5  | 13894947 | A | G | G | G | G | G |
| 2228 | rs6238712   | 12 | 22789619 | G | G | G | A | G | G |
| 2229 | rs3708704   | 12 | 23402031 | G | G | G | A | G | G |
| 2230 | rs6307981   | 12 | 23588362 | C | C | C | C | C | C |
| 2231 | rs3655333   | 12 | 23704034 | A | A | A | G | A | A |
| 2232 | rs3700242   | 12 | 23732399 | G | A | A | A | G | A |
| 2233 | rs6292845   | 12 | 23821732 | A | A | A | C | A | A |
| 2234 | rs3685299   | 12 | 23872081 | G | G | G | A | G | G |
| 2235 | rs3089800   | 12 | 23976362 | A | G | G | A | A | G |
| 2236 | rs3680640   | 12 | 24038099 | G | G | G | A | G | G |
| 2237 | rs3715020   | 12 | 24378566 | G | G | G | A | G | G |
| 2238 | rs3707174   | 12 | 24688708 | A | A | A | G | A | A |
| 2239 | rs3719667   | 12 | 24761765 | G | G | G | A | G | G |
| 2240 | rs6284233   | 12 | 24766153 | G | G | G | G | G | G |
| 2241 | rs6328532   | 12 | 24780605 | A | A | A | G | A | A |
| 2242 | rs3694816   | 12 | 24784007 | C | C | C | A | C | C |
| 2243 | rs4229311   | 12 | 24908259 | G | G | G | G | G | G |
| 2244 | rs3023342   | 12 | 25037508 | G | G | G | A | G | G |
| 2245 | rs3663018   | 12 | 25212442 | G | G | G | A | G | A |
| 2246 | rs6381718   | 12 | 25283139 | G | G | G | A | G | G |
| 2247 | rs6191026   | 12 | 25560891 | G | G | G | G | G | G |
| 2248 | rs3688798   | 12 | 25701041 | C | C | C | A | C | C |
| 2249 | rs3724411   | 12 | 25751719 | A | A | A | G | A | A |
| 2250 | rs3088883   | 12 | 25419978 | A | A | A | T | A | A |
| 2251 | rs6156567   | 12 | 26353043 | A | A | A | A | A | A |
| 2252 | rs3667808   | 12 | 26623728 | G | G | G | A | A | A |
| 2253 | rs3695121   | 12 | 26627241 | A | A | A | G | G | G |
| 2254 | rs4135956   | 12 | 26709335 | A | A | A | G | G | G |
| 2255 | rs6391257   | 12 | 26832868 | A | A | A | A | A | A |
| 2256 | rs3708270   | 12 | 27204179 | A | A | A | C | C | C |
| 2257 | rs4229312   | 12 | 27395395 | C | C | C | C | C | C |
| 2258 | rs3654802   | 12 | 27460625 | G | G | G | A | A | A |
| 2259 | rs3658897   | 12 | 27568325 | A | A | A | G | G | G |
| 2260 | rs6349075   | 12 | 27734606 | A | A | A | A | A | A |
| 2261 | rs3702802   | 12 | 28177625 | G | A | A | G | G | G |
| 2262 | rs3668221   | 12 | 28310479 | A | G | G | G | G | G |
| 2263 | rs6187012   | 12 | 28579503 | C | C | C | A | A | A |
| 2264 | rs3666912   | 12 | 28640887 | G | A | A | A | A | A |
| 2265 | rs3713102   | 12 | 28757599 | A | G | G | A | A | A |
| 2266 | rs3688343   | 12 | 29294408 | C | A | A | C | C | C |
| 2267 | rs3684855   | 12 | 29356050 | A | G | G | A | A | A |
| 2268 | rs6203767   | 12 | 29603206 | A | A | A | A | A | A |
| 2269 | rs3655860   | 12 | 29796244 | G | A | A | G | A | A |
| 2270 | rs3724198   | 12 | 29803337 | A | G | G | G | A | G |
| 2271 | mCV24802848 | 12 | 26126892 | A | A | A | A | A | A |
| 2272 | rs3679148   | 12 | 30186113 | G | G | G | C | G | G |
| 2273 | rs6182576   | 12 | 30449399 | A | G | G | A | A | G |
| 2274 | rs3711448   | 12 | 30453856 | A | G | G | G | A | G |
| 2275 | rs3021923   | 12 | 30553841 | A | G | G | A | A | G |
| 2276 | rs6390300   | 12 | 31065032 | G | A | A | G | G | A |
| 2277 | rs4229321   | 12 | 31224458 | G | G | G | G | G | G |
| 2278 | rs4229313   | 12 | 31224702 | G | G | G | G | G | G |
| 2279 | rs3695382   | 12 | 31352037 | A | G | G | A | A | A |
| 2280 | rs3696037   | 12 | 31352149 | G | A | A | G | G | G |
| 2281 | rs6278497   | 12 | 31494698 | A | G | G | A | A | A |
| 2282 | rs4229333   | 12 | 31714203 | A | A | A | A | A | A |
| 2283 | rs4229328   | 12 | 31714425 | A | A | A | A | A | A |
| 2284 | rs6212948   | 12 | 32138344 | A | A | A | A | A | A |
| 2285 | rs3023209   | 12 | 32405486 | A | A | A | A | G | G |
| 2286 | rs3088766   | 12 | 32811200 | C | A | A | C | C | C |
| 2287 | mCV24442129 | 12 | 29148107 | A | A | A | G | G | A |
| 2288 | rs3659601   | 12 | 32889324 | G | A | A | G | G | A |
| 2289 | rs6317604   | 12 | 32915193 | G | G | G | G | G | G |
| 2290 | rs3658100   | 12 | 33110635 | A | G | G | A | G | G |
| 2291 | rs6218247   | 12 | 33460040 | A | A | A | A | A | A |

|      |             |    |          |   |   |   |   |   |   |
|------|-------------|----|----------|---|---|---|---|---|---|
| 2292 | rs3090124   | 12 | 33900011 | G | G | G | G | G | G |
| 2293 | rs6316395   | 12 | 34049383 | C | C | C | C | C | C |
| 2294 | rs6340536   | 12 | 34772179 | G | G | G | G | G | G |
| 2295 | rs6408286   | 12 | 35243144 | G | G | G | G | G | G |
| 2296 | rs6263867   | 12 | 35365869 | A | A | A | A | A | A |
| 2297 | rs3665526   | 12 | 35440052 | G | C | C | C | C | C |
| 2298 | rs6313441   | 12 | 36653630 | G | G | G | G | G | G |
| 2299 | rs6177471   | 12 | 37020899 | G | G | G | G | G | G |
| 2300 | rs3716646   | 12 | 37775611 | G | A | A | G | A | G |
| 2301 | rs3658320   | 12 | 37775748 | A | G | G | A | G | A |
| 2302 | rs3670955   | 12 | 38018739 | A | C | C | A | C | C |
| 2303 | mCV23299449 | 12 | 34544453 | A | A | A | A | G | A |
| 2304 | rs6387250   | 12 | 38370786 | A | A | A | A | A | A |
| 2305 | rs6369313   | 12 | 38835107 | A | A | A | A | A | A |
| 2306 | mCV24388900 | 12 | 35498829 | A | A | A | A | A | A |
| 2307 | rs6343325   | 12 | 39324445 | G | G | G | G | G | G |
| 2308 | rs3726096   | 12 | 39432172 | G | A | A | G | A | G |
| 2309 | mCV24385481 | 12 | 36365147 | C | A | A | A | C | A |
| 2310 | rs3686437   | 12 | 39778323 | T | A | A | T | A | T |
| 2311 | rs3701242   | 12 | 40487282 | A | G | G | G | A | A |
| 2312 | rs6197363   | 12 | 40497255 | G | G | G | G | G | G |
| 2313 | rs6215996   | 12 | 41135438 | A | A | A | A | A | A |
| 2314 | rs3667804   | 12 | 41704542 | A | A | A | T | A | A |
| 2315 | rs3667177   | 12 | 41760552 | A | T | T | A | A | A |
| 2316 | rs6295757   | 12 | 41944962 | T | T | T | T | T | T |
| 2317 | rs3709102   | 12 | 41980455 | C | C | C | A | C | C |
| 2318 | rs8255801   | 12 | 41981787 | G | G | G | G | G | G |
| 2319 | rs8255800   | 12 | 41982038 | G | G | G | G | G | G |
| 2320 | rs3671614   | 12 | 42085961 | G | A | A | A | G | G |
| 2321 | rs3714242   | 12 | 42476185 | A | G | G | G | A | A |
| 2322 | rs6317361   | 12 | 42513715 | G | A | A | G | G | G |
| 2323 | rs6272759   | 12 | 43108703 | A | A | A | A | A | A |
| 2324 | rs6170134   | 12 | 43739756 | A | A | A | A | A | A |
| 2325 | rs6292281   | 12 | 45189635 | A | A | A | A | A | A |
| 2326 | rs6198011   | 12 | 45399957 | C | C | C | C | C | C |
| 2327 | rs3724479   | 12 | 45630420 | A | G | G | G | G | G |
| 2328 | rs6255802   | 12 | 45968866 | G | A | A | G | G | G |
| 2329 | rs6170639   | 12 | 46297719 | A | G | G | G | G | G |
| 2330 | rs3676345   | 12 | 46298146 | C | A | A | A | A | A |
| 2331 | rs4229358   | 12 | 46958585 | G | G | G | G | G | G |
| 2332 | rs4229359   | 12 | 46958614 | G | G | G | G | G | G |
| 2333 | rs6213741   | 12 | 46811633 | A | T | T | T | T | T |
| 2334 | rs3673246   | 12 | 47202251 | G | G | G | A | A | A |
| 2335 | rs3663333   | 12 | 47287387 | G | A | A | G | G | G |
| 2336 | rs3727109   | 12 | 47512278 | A | C | C | C | C | C |
| 2337 | rs3663603   | 12 | 47893550 | G | G | G | A | A | A |
| 2338 | rs3677499   | 12 | 47917557 | G | A | A | G | G | G |
| 2339 | rs3690123   | 12 | 47947796 | G | A | A | A | A | A |
| 2340 | rs3670749   | 12 | 48181013 | A | A | A | G | G | A |
| 2341 | rs4229363   | 12 | 48372377 | A | G | G | G | G | G |
| 2342 | rs6359128   | 12 | 48495671 | A | G | G | G | G | G |
| 2343 | rs3701314   | 12 | 48536764 | G | A | A | A | A | A |
| 2344 | rs2020842   | 12 | 48630447 | G | A | A | A | A | A |
| 2345 | rs4135641   | 12 | 49059109 | G | G | G | A | A | G |
| 2346 | rs3700857   | 12 | 49142988 | A | A | A | G | G | G |
| 2347 | rs6236032   | 12 | 49237121 | A | A | A | A | A | A |
| 2348 | rs3725916   | 12 | 49242377 | G | G | G | A | A | G |
| 2349 | rs6370023   | 12 | 49529840 | G | G | G | G | G | G |
| 2350 | rs3689063   | 12 | 50059458 | A | G | G | A | G | G |
| 2351 | rs6355857   | 12 | 50536420 | A | A | A | A | A | A |
| 2352 | rs6222411   | 12 | 51604111 | A | A | A | A | A | A |
| 2353 | rs3688680   | 12 | 51829630 | C | A | A | C | A | C |
| 2354 | rs6159691   | 12 | 52315800 | C | G | G | C | G | G |
| 2355 | rs3704934   | 12 | 52424699 | G | A | A | G | A | A |
| 2356 | rs4229370   | 12 | 52437813 | A | A | A | A | A | A |
| 2357 | rs3659385   | 12 | 52773393 | G | A | A | G | A | A |
| 2358 | rs3719306   | 12 | 52871066 | A | G | G | A | G | G |
| 2359 | rs3726434   | 12 | 52875088 | A | G | G | A | G | G |
| 2360 | rs6226467   | 12 | 52986261 | C | C | C | C | C | C |
| 2361 | rs3705833   | 12 | 53150854 | G | G | G | A | G | G |
| 2362 | rs3717784   | 12 | 53229241 | G | G | G | A | G | G |
| 2363 | rs3685560   | 12 | 53280710 | C | G | G | C | G | G |
| 2364 | rs4229376   | 12 | 53465273 | A | A | A | A | A | A |
| 2365 | rs4229375   | 12 | 53465379 | A | A | A | A | A | A |



|      |             |    |          |   |   |   |   |   |   |
|------|-------------|----|----------|---|---|---|---|---|---|
| 2366 | rs6347754   | 12 | 53939576 | A | A | A | A | A | A |
| 2367 | rs3662939   | 12 | 54082727 | A | T | T | T | T | A |
| 2368 | rs3664781   | 12 | 54576349 | C | C | C | A | C | C |
| 2369 | rs3674641   | 12 | 55129109 | G | G | G | A | A | G |
| 2370 | rs3690129   | 12 | 55338079 | A | A | A | C | C | A |
| 2371 | rs6411363   | 12 | 55345736 | G | G | G | G | G | G |
| 2372 | rs6215044   | 12 | 55927846 | G | G | G | G | G | G |
| 2373 | rs3721804   | 12 | 56413174 | T | A | A | T | T | A |
| 2374 | rs4139129   | 12 | 56528942 | A | A | A | G | G | A |
| 2375 | rs3660822   | 12 | 56812162 | A | C | C | A | A | A |
| 2376 | mCV22351241 | 12 | 54143643 | A | G | G | G | G | A |
| 2377 | rs6276393   | 12 | 57076990 | A | A | A | A | A | A |
| 2378 | rs6381937   | 12 | 57623071 | A | A | A | A | A | A |
| 2379 | rs3673599   | 12 | 58027245 | A | G | G | A | G | G |
| 2380 | rs6386766   | 12 | 58739672 | T | A | A | T | A | A |
| 2381 | rs6400991   | 12 | 58779990 | G | G | G | G | G | G |
| 2382 | mCV24253983 | 12 | 56253182 | G | A | A | G | A | G |
| 2383 | rs3657568   | 12 | 59225844 | A | A | A | C | C | C |
| 2384 | rs3707833   | 12 | 59283229 | A | A | A | T | A | T |
| 2385 | rs6199243   | 12 | 59345732 | A | A | A | A | A | A |
| 2386 | rs3681130   | 12 | 59481270 | G | G | G | A | G | A |
| 2387 | rs3677344   | 12 | 59848542 | C | C | C | A | A | A |
| 2388 | rs3724627   | 12 | 60632584 | G | G | G | A | A | G |
| 2389 | rs3686891   | 12 | 60735544 | A | G | G | A | A | G |
| 2390 | mCV24690992 | 12 | 58174760 | G | A | A | G | A | G |
| 2391 | rs4137680   | 12 | 61533001 | C | C | C | G | G | G |
| 2392 | rs3668686   | 12 | 61540175 | C | C | C | A | A | A |
| 2393 | rs3669929   | 12 | 61540420 | A | A | A | C | C | C |
| 2394 | rs3685346   | 12 | 61540594 | A | A | A | G | G | G |
| 2395 | rs6329307   | 12 | 61910476 | G | G | G | G | G | G |
| 2396 | rs3691763   | 12 | 61922672 | A | A | A | G | G | G |
| 2397 | rs4229388   | 12 | 62011126 | A | A | A | A | A | A |
| 2398 | rs3660226   | 12 | 62208538 | A | A | A | G | G | A |
| 2399 | rs3689341   | 12 | 62652711 | G | A | A | A | A | A |
| 2400 | rs6185479   | 12 | 62706123 | C | C | C | C | C | C |
| 2401 | rs3716547   | 12 | 62831831 | A | C | C | C | A | C |
| 2402 | rs6341977   | 12 | 63021698 | A | A | A | A | A | A |
| 2403 | rs3686378   | 12 | 63477601 | A | A | A | G | G | G |
| 2404 | rs3089561   | 12 | 63517344 | A | A | A | A | A | A |
| 2405 | rs6357043   | 12 | 64059650 | A | G | G | A | A | G |
| 2406 | rs6348266   | 12 | 64170164 | G | G | G | G | G | G |
| 2407 | rs3713923   | 12 | 64368458 | G | A | A | G | G | G |
| 2408 | rs6383133   | 12 | 64426353 | G | A | A | G | G | A |
| 2409 | rs3660644   | 12 | 64473664 | C | C | C | A | A | C |
| 2410 | rs3705675   | 12 | 65105842 | G | G | G | A | G | G |
| 2411 | rs4229406   | 12 | 65290824 | G | G | G | G | G | G |
| 2412 | rs4229408   | 12 | 65290926 | A | A | A | A | A | A |
| 2413 | rs6195664   | 12 | 65498422 | A | C | C | A | C | C |
| 2414 | rs3023346   | 12 | 65522126 | G | A | A | G | A | A |
| 2415 | rs3689845   | 12 | 65526885 | A | G | G | A | G | G |
| 2416 | rs6327000   | 12 | 65590325 | A | A | A | A | A | A |
| 2417 | rs3088485   | 12 | 65790339 | G | G | G | G | G | G |
| 2418 | rs6229531   | 12 | 66516892 | G | G | G | G | G | G |
| 2419 | rs3662140   | 12 | 67180434 | G | A | A | A | A | G |
| 2420 | rs3669366   | 12 | 67275491 | A | A | A | G | G | A |
| 2421 | rs3674010   | 12 | 67423261 | G | C | C | C | C | G |
| 2422 | rs3674090   | 12 | 67673332 | A | G | G | A | A | A |
| 2423 | rs3695552   | 12 | 67683895 | A | G | G | A | A | G |
| 2424 | rs6203329   | 12 | 67927371 | A | G | G | G | G | G |
| 2425 | rs3714720   | 12 | 68057798 | A | C | C | A | A | A |
| 2426 | rs4229413   | 12 | 68073270 | G | G | G | G | G | G |
| 2427 | rs4229411   | 12 | 68073471 | A | A | A | A | A | A |
| 2428 | rs4229417   | 12 | 68322473 | A | A | A | A | A | A |
| 2429 | rs4229415   | 12 | 68322697 | G | A | A | A | A | A |
| 2430 | rs6387942   | 12 | 68566805 | G | G | G | G | G | G |
| 2431 | rs3687032   | 12 | 68778319 | G | G | G | A | A | A |
| 2432 | rs3683927   | 12 | 68885189 | A | G | G | G | G | G |
| 2433 | rs4137363   | 12 | 69184710 | C | C | C | A | A | C |
| 2434 | rs3023349   | 12 | 69210214 | T | T | T | A | A | T |
| 2435 | rs8259450   | 12 | 69221987 | G | G | G | A | A | G |
| 2436 | rs3685417   | 12 | 69267758 | A | A | A | G | G | G |
| 2437 | rs6325248   | 12 | 69695532 | C | C | C | C | C | C |
| 2438 | rs3709008   | 12 | 69967120 | G | G | G | A | A | G |
| 2439 | rs3656227   | 12 | 70010983 | G | G | G | A | A | G |

|      |             |    |          |   |   |   |   |   |   |
|------|-------------|----|----------|---|---|---|---|---|---|
| 2440 | rs3658768   | 12 | 70011385 | A | A | A | G | G | A |
| 2441 | rs6346026   | 12 | 70290897 | G | A | A | A | G | G |
| 2442 | rs6300343   | 12 | 71305416 | C | C | C | C | C | C |
| 2443 | rs3665469   | 12 | 71367121 | G | A | A | A | G | A |
| 2444 | rs3682382   | 12 | 71586706 | G | A | A | A | A | A |
| 2445 | rs6344480   | 12 | 71913451 | A | A | A | A | A | A |
| 2446 | rs4229420   | 12 | 72092079 | A | A | A | A | A | A |
| 2447 | rs3700106   | 12 | 72162132 | G | G | G | A | A | G |
| 2448 | rs6403750   | 12 | 72538872 | G | G | G | G | G | G |
| 2449 | rs4229428   | 12 | 73374791 | G | G | G | G | G | G |
| 2450 | rs3724069   | 12 | 73456090 | G | C | C | C | C | C |
| 2451 | rs6263997   | 12 | 73504905 | A | A | A | A | A | A |
| 2452 | rs6308760   | 12 | 74349342 | G | G | G | G | G | G |
| 2453 | mCV23169261 | 12 | 72254494 | C | C | C | A | A | C |
| 2454 | rs6199755   | 12 | 74448630 | A | A | A | A | A | A |
| 2455 | rs4229440   | 12 | 74470873 | T | T | T | T | T | T |
| 2456 | rs3662628   | 12 | 74558132 | A | G | G | G | G | A |
| 2457 | rs6320805   | 12 | 74958005 | G | A | A | A | A | G |
| 2458 | rs3696769   | 12 | 75038513 | G | A | A | A | A | A |
| 2459 | rs3674330   | 12 | 75415973 | A | G | G | A | G | G |
| 2460 | rs3689015   | 12 | 75460620 | G | A | A | A | A | G |
| 2461 | rs4229448   | 12 | 75537438 | A | A | A | A | A | G |
| 2462 | rs6379829   | 12 | 75637041 | G | G | G | G | G | G |
| 2463 | rs8238659   | 12 | 76255843 | A | A | A | A | A | A |
| 2464 | rs8238658   | 12 | 76262730 | G | G | G | G | G | G |
| 2465 | rs3654718   | 12 | 76277248 | G | G | G | A | G | G |
| 2466 | rs3693948   | 12 | 76279025 | G | G | G | A | G | G |
| 2467 | rs3725854   | 12 | 76440446 | G | A | A | G | A | A |
| 2468 | rs3653954   | 12 | 76440760 | G | A | A | G | A | A |
| 2469 | rs4229449   | 12 | 76874876 | G | G | G | G | G | G |
| 2470 | rs6170344   | 12 | 76890398 | G | C | C | G | C | C |
| 2471 | rs6205632   | 12 | 76936954 | A | G | G | A | G | G |
| 2472 | rs3696951   | 12 | 77991846 | A | G | G | A | G | A |
| 2473 | rs6263380   | 12 | 78119135 | C | A | A | C | A | C |
| 2474 | rs3088680   | 12 | 78294575 | C | C | C | C | C | C |
| 2475 | rs4229463   | 12 | 78526744 | A | A | A | A | A | A |
| 2476 | rs6224091   | 12 | 79325737 | A | A | A | A | A | A |
| 2477 | rs3658658   | 12 | 79821009 | A | A | A | A | A | A |
| 2478 | rs3088896   | 12 | 79829077 | C | C | C | C | C | C |
| 2479 | rs6401803   | 12 | 80045455 | A | A | A | A | A | A |
| 2480 | rs4229466   | 12 | 80239439 | G | G | G | G | G | G |
| 2481 | rs4229469   | 12 | 80489865 | G | G | G | G | G | G |
| 2482 | mCV22806754 | 12 | 78442240 | A | A | A | A | A | A |
| 2483 | rs6298386   | 12 | 80919627 | A | A | A | A | A | A |
| 2484 | rs6261325   | 12 | 80956834 | G | G | G | G | G | G |
| 2485 | rs3692226   | 12 | 81341363 | C | C | C | C | C | C |
| 2486 | rs4229478   | 12 | 81555593 | A | A | A | A | A | A |
| 2487 | rs6387971   | 12 | 81958771 | A | A | A | A | A | G |
| 2488 | rs4229483   | 12 | 82293493 | G | G | G | G | G | G |
| 2489 | rs4229484   | 12 | 82293655 | C | C | C | C | C | C |
| 2490 | rs3719282   | 12 | 82356288 | G | G | G | A | G | G |
| 2491 | rs3660605   | 12 | 82425750 | A | A | A | G | A | G |
| 2492 | rs4222057   | 12 | 82441531 | A | A | A | A | A | A |
| 2493 | rs8259763   | 12 | 82491932 | A | A | A | G | A | A |
| 2494 | rs8259789   | 12 | 82496042 | A | A | A | A | A | A |
| 2495 | rs6353902   | 12 | 83062418 | G | G | G | A | G | G |
| 2496 | rs3699539   | 12 | 83175209 | G | G | G | A | G | A |
| 2497 | rs6351282   | 12 | 83633780 | G | G | G | G | G | G |
| 2498 | rs3711162   | 12 | 83723888 | G | A | A | A | A | G |
| 2499 | rs4229495   | 12 | 84926043 | A | A | A | A | A | A |
| 2500 | rs3682466   | 12 | 85218939 | A | A | A | A | A | A |
| 2501 | rs6347765   | 12 | 85263005 | C | C | C | C | C | G |
| 2502 | rs6288403   | 12 | 85563437 | A | A | A | T | A | A |
| 2503 | rs3670410   | 12 | 85932990 | G | G | G | A | G | G |
| 2504 | rs4229506   | 12 | 86141518 | G | G | G | A | G | A |
| 2505 | rs3088937   | 12 | 86151911 | A | A | A | A | A | A |
| 2506 | rs3089776   | 12 | 86631131 | A | A | A | A | A | A |
| 2507 | rs3720969   | 12 | 87023258 | C | C | C | A | C | C |
| 2508 | rs3676063   | 12 | 87028895 | A | A | A | G | A | A |
| 2509 | rs6213448   | 12 | 87072159 | A | A | A | A | A | A |
| 2510 | rs6399840   | 12 | 87554618 | A | A | A | A | A | A |
| 2511 | rs3676085   | 12 | 87765992 | A | G | G | A | G | G |
| 2512 | rs3709687   | 12 | 88015458 | C | C | C | C | C | C |
| 2513 | rs6214514   | 12 | 88127638 | A | C | C | A | C | A |

|      |             |    |           |   |   |   |   |   |   |
|------|-------------|----|-----------|---|---|---|---|---|---|
| 2514 | rs6356138   | 12 | 88350411  | A | G | G | A | G | A |
| 2515 | rs3090088   | 12 | 88420775  | C | C | C | C | C | C |
| 2516 | rs6408857   | 12 | 89113620  | A | A | A | A | A | A |
| 2517 | rs3090231   | 12 | 89644192  | G | G | G | G | G | G |
| 2518 | rs6297004   | 12 | 89782983  | G | G | G | G | G | G |
| 2519 | rs6217018   | 12 | 91062241  | A | A | A | A | A | A |
| 2520 | rs6244774   | 12 | 91861271  | G | G | G | G | G | G |
| 2521 | rs3679514   | 12 | 92576929  | G | A | A | A | A | G |
| 2522 | rs6228161   | 12 | 93072334  | G | G | G | G | G | G |
| 2523 | rs3089061   | 12 | 93396509  | A | A | A | A | A | A |
| 2524 | rs4136039   | 12 | 93415640  | G | A | A | A | A | G |
| 2525 | rs6269096   | 12 | 93648867  | T | A | A | A | A | T |
| 2526 | rs3666004   | 12 | 94082142  | G | C | C | C | C | G |
| 2527 | rs3716084   | 12 | 94501426  | G | A | A | A | G | G |
| 2528 | rs6177548   | 12 | 94582022  | A | A | A | G | A | A |
| 2529 | rs3674235   | 12 | 94587391  | G | G | G | A | G | G |
| 2530 | rs6263565   | 12 | 94855105  | G | G | G | G | G | G |
| 2531 | rs3698001   | 12 | 95092951  | G | G | G | A | A | A |
| 2532 | rs3698544   | 12 | 95093015  | G | G | G | A | A | A |
| 2533 | rs6295839   | 12 | 95201551  | G | G | G | G | G | G |
| 2534 | rs6184745   | 12 | 95492537  | A | G | G | G | A | A |
| 2535 | rs3695075   | 12 | 96232684  | C | A | A | A | C | C |
| 2536 | rs3700012   | 12 | 96438694  | A | G | G | G | G | A |
| 2537 | rs6388125   | 12 | 96515763  | A | A | A | A | A | A |
| 2538 | rs6245139   | 12 | 96914467  | A | A | A | A | A | A |
| 2539 | rs3693605   | 12 | 96990963  | C | A | A | A | C | C |
| 2540 | rs4229526   | 12 | 97077380  | G | G | G | G | G | G |
| 2541 | rs6227567   | 12 | 97634630  | A | A | A | A | A | A |
| 2542 | rs3088666   | 12 | 97704550  | G | G | G | G | G | G |
| 2543 | rs4229534   | 12 | 98084994  | C | C | C | C | C | C |
| 2544 | rs6278016   | 12 | 98325422  | A | A | A | A | A | A |
| 2545 | rs8271271   | 12 | 98863568  | G | G | G | G | A | A |
| 2546 | rs3724260   | 12 | 99431602  | A | A | A | A | G | G |
| 2547 | rs3663596   | 12 | 99565379  | G | A | A | A | G | G |
| 2548 | rs6216501   | 12 | 99776400  | A | A | A | A | A | A |
| 2549 | rs8245329   | 12 | 100310626 | A | A | A | A | A | A |
| 2550 | rs8245330   | 12 | 100310731 | A | A | A | A | A | A |
| 2551 | rs8245337   | 12 | 100310929 | A | A | A | A | A | A |
| 2552 | rs8245333   | 12 | 100311022 | A | A | A | A | A | A |
| 2553 | rs6317509   | 12 | 100757538 | C | C | C | C | C | C |
| 2554 | rs3667299   | 12 | 101109359 | G | G | G | G | G | G |
| 2555 | rs6376610   | 12 | 101185032 | A | A | A | A | A | A |
| 2556 | rs3721148   | 12 | 101353045 | C | C | C | C | C | A |
| 2557 | rs3653844   | 12 | 102255090 | A | C | C | A | A | A |
| 2558 | rs6303051   | 12 | 102387656 | G | A | A | G | G | G |
| 2559 | rs3663172   | 12 | 102647407 | T | A | A | T | A | A |
| 2560 | rs3694191   | 12 | 102651625 | A | A | C | A | A | A |
| 2561 | rs6223643   | 12 | 102961454 | G | G | A | G | G | G |
| 2562 | rs6239861   | 12 | 103259405 | A | A | G | A | A | A |
| 2563 | rs3707852   | 12 | 103274219 | A | A | C | A | A | A |
| 2564 | rs3707436   | 12 | 103442463 | G | G | A | G | G | G |
| 2565 | rs6348190   | 12 | 104342236 | G | G | G | G | G | G |
| 2566 | rs4229571   | 12 | 104497467 | C | C | C | C | C | C |
| 2567 | rs3672124   | 12 | 105361486 | A | G | G | A | A | A |
| 2568 | rs6345717   | 12 | 105432501 | G | G | G | G | G | G |
| 2569 | mCV23906390 | 12 | 102852763 | A | G | A | A | G | A |
| 2570 | rs3674174   | 12 | 105774185 | C | C | A | C | C | C |
| 2571 | rs6396219   | 12 | 105853934 | A | A | A | A | A | A |
| 2572 | rs4229586   | 12 | 106457683 | A | C | C | A | C | C |
| 2573 | rs3693074   | 12 | 106596291 | A | G | G | A | G | G |
| 2574 | rs6333099   | 12 | 106604815 | A | G | G | A | G | G |
| 2575 | rs3691931   | 12 | 107204115 | A | G | G | A | G | G |
| 2576 | rs4229602   | 12 | 107367411 | A | G | G | A | A | G |
| 2577 | rs4229600   | 12 | 107367519 | A | A | A | A | A | A |
| 2578 | rs6406827   | 12 | 107766327 | A | G | G | A | A | G |
| 2579 | rs6310252   | 12 | 107970036 | G | G | G | G | G | G |
| 2580 | rs4229611   | 12 | 108009492 | G | A | G | A | G | G |
| 2581 | rs4229612   | 12 | 108009606 | A | A | A | G | G | G |
| 2582 | rs4229613   | 12 | 108009694 | A | A | A | A | A | A |
| 2583 | rs4140265   | 12 | 108065683 | G | G | G | A | G | G |
| 2584 | rs3021903   | 12 | 108081557 | G | A | A | G | G | G |
| 2585 | rs3090605   | 12 | 108183110 | G | A | G | G | G | G |
| 2586 | rs6278495   | 12 | 108970749 | G | G | G | G | G | G |
| 2587 | mCV23895237 | 12 | 106512272 | G | A | A | G | A | A |

|      |             |    |           |     |      |   |   |      |   |
|------|-------------|----|-----------|-----|------|---|---|------|---|
| 2588 | mCV23895227 | 12 | 106515798 | T   | A    | A | T | A    | A |
| 2589 | mCV23895225 | 12 | 106515931 | A   | G    | G | A | G    | G |
| 2590 | mCV23894910 | 12 | 106516117 | G   | A    | A | G | A    | A |
| 2591 | mCV23894909 | 12 | 106516181 | G   | C    | C | G | C    | C |
| 2592 | mCV23894908 | 12 | 106519874 | G   | A    | A | G | A    | A |
| 2593 | mCV23894889 | 12 | 106522357 | T   | A    | A | T | A    | A |
| 2594 | mCV23894888 | 12 | 106522367 | A   | G    | G | A | G    | G |
| 2595 | mCV23894883 | 12 | 106529000 | A   | G    | G | A | G    | G |
| 2596 | mCV23894882 | 12 | 106529149 | G   | C    | C | G | C    | C |
| 2597 | mCV23894881 | 12 | 106529161 | G   | NONE | A | G | A    | A |
| 2598 | mCV23893876 | 12 | 106529430 | A   | G    | A | A | A    | A |
| 2599 | mCV23893864 | 12 | 106530153 | A   | G    | G | A | G    | A |
| 2600 | mCV23893863 | 12 | 106530190 | A   | T    | T | A | T    | T |
| 2601 | mCV23893852 | 12 | 106530561 | A   | G    | G | A | G    | A |
| 2602 | mCV23893851 | 12 | 106530652 | A   | G    | G | A | G    | G |
| 2603 | mCV23893844 | 12 | 106531971 | A   | G    | G | A | G    | A |
| 2604 | mCV23893843 | 12 | 106532041 | G   | A    | A | G | A    | A |
| 2605 | mCV23893842 | 12 | 106532478 | G   | A    | A | G | A    | G |
| 2606 | mCV23893832 | 12 | 109982126 | A   | C    | C | A | C    | A |
| 2607 | mCV24934271 | 12 | 106535074 | G   | C    | C | G | C    | G |
| 2608 | mCV24934270 | 12 | 106535100 | A   | G    | G | A | G    | A |
| 2609 | mCV24934262 | 12 | 106535327 | A   | C    | C | A | C    | C |
| 2610 | mCV24934253 | 12 | 106545944 | G   | G    | G | G | G    | G |
| 2611 | mCV24934246 | 12 | 106546390 | G   | A    | A | G | A    | A |
| 2612 | mCV24934244 | 12 | 106546546 | C   | A    | A | C | A    | A |
| 2613 | mCV24934236 | 12 | 106546964 | C   | A    | A | C | A    | A |
| 2614 | mCV24934234 | 12 | 106547162 | G   | A    | A | G | A    | A |
| 2615 | mCV24934227 | 12 | 106547494 | A   | G    | G | A | G    | G |
| 2616 | mCV24934226 | 12 | 106547539 | C   | G    | G | C | G    | G |
| 2617 | mCV24934218 | 12 | 106547730 | A   | G    | G | A | G    | G |
| 2618 | rs3709829   | 12 | 109139529 | A   | A    | C | A | A    | A |
| 2619 | rs3711043   | 12 | 109139726 | G   | G    | C | G | G    | G |
| 2620 | rs4138747   | 12 | 109261892 | A/T | T    | T | A | T    | T |
| 2621 | rs3679326   | 12 | 109442366 | G   | A    | A | A | A    | A |
| 2622 | mCV23100902 | 12 | 107255389 | A   | G    | G | A | G    | G |
| 2623 | rs6153883   | 12 | 109848662 | A   | A    | A | A | A    | A |
| 2624 | rs6376011   | 12 | 110360295 | A   | A    | A | C | NONE | A |
| 2625 | mCV23887919 | 12 | 111901600 | T   | T    | T | T | T    | T |
| 2626 | rs6403551   | 12 | 111018750 | A   | T    | A | T | A    | A |
| 2627 | rs3688774   | 12 | 111130939 | G   | G    | G | A | G    | G |
| 2628 | rs3700528   | 12 | 111290218 | G   | G    | G | A | G    | G |
| 2629 | rs3670898   | 12 | 111707329 | G   | G    | G | C | G    | G |
| 2630 | rs6320467   | 12 | 111953626 | G   | G    | G | G | G    | G |
| 2631 | rs3654706   | 12 | 112065076 | G   | G    | G | A | A    | G |
| 2632 | rs3713779   | 12 | 112325864 | C   | A    | C | A | A    | A |
| 2633 | rs3694890   | 12 | 112374446 | A   | G    | A | G | A    | A |
| 2634 | rs3705923   | 12 | 112411308 | G   | G    | G | A | G    | A |
| 2635 | rs6292408   | 12 | 112644408 | C   | G    | C | C | C    | G |
| 2636 | rs3692361   | 12 | 112704261 | G   | G    | G | A | G    | A |
| 2637 | rs4222060   | 12 | 112741936 | G   | G    | G | G | G    | G |
| 2638 | rs4222062   | 12 | 112742112 | A   | A    | A | G | A    | G |
| 2639 | rs6284477   | 12 | 112755139 | A   | A    | A | A | A    | A |
| 2640 | rs3719921   | 12 | 112976311 | A   | C    | A | C | A    | C |
| 2641 | rs6395554   | 12 | 113904524 | G   | G    | G | G | G    | G |
| 2642 | rs4135448   | 12 | 114088565 | G   | G    | G | A | G    | A |
| 2643 | rs6327003   | 12 | 114194856 | G   | G    | G | G | G    | G |
| 2644 | rs3672335   | 12 | 114651707 | C   | C    | C | A | C    | A |
| 2645 | rs3686531   | 12 | 114773303 | G   | G    | G | A | G    | A |
| 2646 | rs3679276   | 12 | 114928237 | A   | G    | A | G | A    | G |
| 2647 | mCV24244050 | 13 | 119922    | G   | G    | A | A | A    | G |
| 2648 | rs6215262   | 13 | 3556871   | A   | A    | G | G | G    | A |
| 2649 | rs3661352   | 13 | 3641527   | G   | G    | C | C | C    | G |
| 2650 | rs3695486   | 13 | 3931389   | G   | G    | A | A | A    | G |
| 2651 | rs3721849   | 13 | 4363382   | C   | C    | C | C | C    | C |
| 2652 | rs6384115   | 13 | 4381215   | A   | A    | A | A | A    | A |
| 2653 | rs6249257   | 13 | 4596693   | C   | C    | C | C | C    | C |
| 2654 | rs3656652   | 13 | 4671653   | G   | G    | A | A | A    | G |
| 2655 | rs3686663   | 13 | 4702493   | G   | G    | A | A | A    | G |
| 2656 | rs3713268   | 13 | 4795576   | G   | G    | A | A | A    | G |
| 2657 | rs6298246   | 13 | 5123199   | G   | G    | G | G | G    | G |
| 2658 | rs6364621   | 13 | 5133192   | G   | G    | G | G | G    | G |
| 2659 | rs6318987   | 13 | 5767683   | G   | G    | G | G | G    | G |
| 2660 | rs4229621   | 13 | 6009386   | A   | A    | A | A | A    | A |
| 2661 | rs3694393   | 13 | 33544897  | G   | C    | C | G | C    | G |

|      |             |    |          |   |   |   |   |   |   |
|------|-------------|----|----------|---|---|---|---|---|---|
| 2662 | rs6243819   | 13 | 6897674  | G | G | G | G | G | G |
| 2663 | rs6301008   | 13 | 7490090  | G | G | G | G | G | G |
| 2664 | mCV24980830 | 13 | 11184998 | A | T | T | T | T | T |
| 2665 | rs6250327   | 13 | 8160005  | A | A | A | A | A | A |
| 2666 | rs6178370   | 13 | 8898140  | C | C | C | C | C | C |
| 2667 | rs3695750   | 13 | 9264112  | C | G | G | G | G | G |
| 2668 | rs6329684   | 13 | 9950160  | G | A | A | A | A | A |
| 2669 | rs3090033   | 13 | 10200383 | A | A | A | A | A | A |
| 2670 | rs4229629   | 13 | 10420533 | C | A | A | A | A | A |
| 2671 | rs4229628   | 13 | 10420670 | G | G | G | G | G | G |
| 2672 | mCV23972264 | 13 | 12914818 | A | G | G | G | G | G |
| 2673 | rs3717128   | 13 | 11339529 | A | G | G | G | G | G |
| 2674 | rs3691043   | 13 | 11505904 | A | G | G | G | G | G |
| 2675 | rs6187266   | 13 | 11603829 | A | T | T | T | T | T |
| 2676 | rs6153178   | 13 | 12363118 | A | G | G | G | G | G |
| 2677 | rs3663551   | 13 | 12426262 | A | G | G | G | G | A |
| 2678 | rs6192173   | 13 | 12522128 | T | A | A | A | A | A |
| 2679 | rs4232414   | 13 | 13010590 | G | G | G | G | G | G |
| 2680 | rs6257075   | 13 | 13128340 | A | C | C | C | C | A |
| 2681 | rs3691785   | 13 | 13330479 | C | A | A | A | A | A |
| 2682 | rs6304179   | 13 | 13555082 | A | A | A | A | A | A |
| 2683 | rs4229632   | 13 | 13960934 | A | A | A | A | A | A |
| 2684 | rs3684256   | 13 | 14258620 | G | A | A | A | A | A |
| 2685 | rs6352759   | 13 | 14657783 | T | T | T | T | T | T |
| 2686 | rs4229656   | 13 | 15084608 | A | A | A | A | A | A |
| 2687 | rs6180409   | 13 | 15468943 | A | A | A | A | A | A |
| 2688 | rs3701757   | 13 | 15541555 | G | G | G | A | G | G |
| 2689 | rs6335891   | 13 | 15938044 | C | C | C | C | C | G |
| 2690 | rs3674247   | 13 | 16167183 | G | G | G | A | G | G |
| 2691 | rs3695969   | 13 | 16217832 | G | G | G | A | G | G |
| 2692 | rs3705255   | 13 | 16630127 | A | G | G | G | G | A |
| 2693 | rs3678616   | 13 | 16665395 | C | A | A | C | A | C |
| 2694 | rs3721858   | 13 | 16752051 | G | A | A | G | A | A |
| 2695 | rs3699519   | 13 | 16786707 | G | A | A | G | A | A |
| 2696 | rs6349338   | 13 | 16856178 | G | G | G | G | G | G |
| 2697 | rs6320527   | 13 | 17525335 | A | A | A | A | A | A |
| 2698 | rs3023379   | 13 | 17669053 | G | G | G | A | G | G |
| 2699 | rs3715806   | 13 | 17712010 | G | G | G | A | G | G |
| 2700 | rs3693929   | 13 | 17744115 | G | G | G | A | G | G |
| 2701 | rs4229666   | 13 | 17940399 | C | C | C | C | C | C |
| 2702 | rs3656183   | 13 | 18147750 | G | G | G | A | G | G |
| 2703 | rs3656715   | 13 | 18147800 | A | A | A | G | A | A |
| 2704 | rs6167514   | 13 | 18429845 | A | A | A | A | A | A |
| 2705 | rs3701424   | 13 | 18788201 | A | A | A | G | A | A |
| 2706 | rs3714148   | 13 | 19262448 | G | G | G | A | G | G |
| 2707 | rs3700270   | 13 | 19520841 | A | G | G | G | G | G |
| 2708 | rs3676630   | 13 | 19798486 | A | G | G | A | G | G |
| 2709 | rs6367784   | 13 | 20007396 | G | G | G | A | G | G |
| 2710 | rs3679784   | 13 | 20286264 | G | A | A | G | A | A |
| 2711 | rs6226055   | 13 | 20359236 | A | A | A | A | A | A |
| 2712 | rs3710676   | 13 | 20633724 | C | C | C | A | C | C |
| 2713 | rs8266909   | 13 | 20668830 | G | G | G | G | G | G |
| 2714 | rs8266906   | 13 | 20669498 | C | C | C | C | C | C |
| 2715 | rs8266896   | 13 | 20671498 | G | G | G | A | G | G |
| 2716 | rs3668544   | 13 | 21097503 | A | G | G | G | G | G |
| 2717 | rs3091203   | 13 | 21159699 | G | A | A | G | A | A |
| 2718 | rs6376461   | 13 | 22226310 | A | A | A | A | A | A |
| 2719 | rs4229670   | 13 | 22230130 | C | C | C | C | C | C |
| 2720 | rs4139825   | 13 | 23111032 | A | A | A | A | A | A |
| 2721 | rs3681123   | 13 | 22603016 | G | G | G | G | G | G |
| 2722 | rs6294004   | 13 | 22822215 | A | A | A | A | A | A |
| 2723 | rs8267056   | 13 | 23080696 | G | G | G | A | G | G |
| 2724 | rs8267050   | 13 | 23080918 | A | A | A | C | A | A |
| 2725 | rs8267104   | 13 | 23085429 | G | G | G | G | G | G |
| 2726 | rs8267012   | 13 | 23088244 | G | G | G | G | G | G |
| 2727 | rs8266971   | 13 | 23601518 | A | A | A | T | A | A |
| 2728 | rs3654242   | 13 | 23166741 | A | A | A | T | A | A |
| 2729 | rs3719353   | 13 | 23170517 | G | G | G | A | G | G |
| 2730 | rs6206744   | 13 | 24054287 | A | A | A | A | A | A |
| 2731 | mCV23904194 | 13 | 27025016 | A | A | A | A | A | A |
| 2732 | rs3090112   | 13 | 25254830 | G | G | G | G | G | G |
| 2733 | rs6325339   | 13 | 25755040 | C | C | C | C | C | C |
| 2734 | rs6391726   | 13 | 26232703 | A | A | A | A | A | A |
| 2735 | rs4229678   | 13 | 26444733 | A | A | A | A | A | A |

|      |             |    |          |   |   |   |   |   |   |
|------|-------------|----|----------|---|---|---|---|---|---|
| 2736 | rs4229674   | 13 | 26444977 | A | A | A | A | A | A |
| 2737 | mCV23833242 | 13 | 30504063 | A | C | C | A | C | A |
| 2738 | rs6374214   | 13 | 27839476 | A | A | A | A | A | A |
| 2739 | rs3089940   | 13 | 28368714 | G | G | G | G | G | G |
| 2740 | rs6403272   | 13 | 29199486 | G | G | G | G | G | G |
| 2741 | mCV23984302 | 13 | 32023514 | C | G | G | C | G | C |
| 2742 | rs4229680   | 13 | 29762601 | G | G | G | G | G | G |
| 2743 | rs3669896   | 13 | 29808059 | C | A | A | A | A | A |
| 2744 | rs3682248   | 13 | 30430397 | A | T | T | T | T | T |
| 2745 | rs3710348   | 13 | 30653000 | C | C | C | A | C | A |
| 2746 | rs6192273   | 13 | 31114426 | G | G | G | G | G | G |
| 2747 | rs6308946   | 13 | 31284166 | A | G | G | A | G | A |
| 2748 | rs3711424   | 13 | 31374009 | A | G | G | A | G | A |
| 2749 | rs3668303   | 13 | 31379494 | A | G | G | A | G | A |
| 2750 | rs4139503   | 13 | 31418904 | A | G | G | A | G | A |
| 2751 | rs3720707   | 13 | 31547838 | A | G | G | A | G | A |
| 2752 | rs3687359   | 13 | 31791219 | A | T | T | A | T | A |
| 2753 | rs8273595   | 13 | 32222998 | G | G | G | G | G | G |
| 2754 | rs8273601   | 13 | 32226239 | G | G | G | G | G | G |
| 2755 | rs4140378   | 13 | 32335386 | A | G | G | A | G | A |
| 2756 | rs3710232   | 13 | 32446420 | A | G | G | A | G | A |
| 2757 | mCV25144745 | 13 | 34616421 | C | A | A | C | A | C |
| 2758 | rs6158160   | 13 | 33031997 | G | G | G | G | G | G |
| 2759 | rs3707097   | 13 | 33614779 | G | A | A | G | A | G |
| 2760 | rs3723893   | 13 | 33615142 | G | A | A | G | A | G |
| 2761 | rs6355039   | 13 | 33629153 | G | C | C | G | C | G |
| 2762 | rs3727136   | 13 | 33688045 | G | A | A | G | A | G |
| 2763 | rs3089977   | 13 | 33867512 | G | G | G | G | G | G |
| 2764 | rs3725187   | 13 | 34496200 | G | A | A | G | A | G |
| 2765 | rs6238465   | 13 | 34677203 | G | A | A | G | A | G |
| 2766 | rs3684485   | 13 | 34795024 | A | G | G | A | G | A |
| 2767 | rs4229686   | 13 | 35310554 | G | G | G | G | G | G |
| 2768 | rs6293765   | 13 | 35365452 | A | G | G | A | G | A |
| 2769 | rs3726262   | 13 | 35576181 | A | G | G | A | G | A |
| 2770 | rs6309675   | 13 | 35701126 | T | T | T | T | T | T |
| 2771 | rs3655084   | 13 | 36719996 | T | A | A | T | T | T |
| 2772 | rs3694317   | 13 | 36760555 | G | A | A | G | G | G |
| 2773 | rs3090248   | 13 | 36767228 | A | A | A | A | A | A |
| 2774 | rs3685130   | 13 | 36832493 | G | A | A | A | A | G |
| 2775 | rs3088825   | 13 | 37071864 | A | G | G | A | A | A |
| 2776 | rs6327619   | 13 | 37153901 | C | C | C | G | G | C |
| 2777 | rs3660981   | 13 | 37175330 | C | G | G | G | G | C |
| 2778 | rs3724709   | 13 | 37678501 | A | A | A | C | C | A |
| 2779 | rs3684564   | 13 | 37868653 | G | A | A | A | A | G |
| 2780 | rs4229688   | 13 | 37943851 | G | G | G | G | G | G |
| 2781 | rs3716346   | 13 | 38186094 | G | A | A | G | G | G |
| 2782 | rs3720620   | 13 | 38196197 | T | A | A | T | T | T |
| 2783 | rs6206708   | 13 | 38372973 | C | G | G | G | G | C |
| 2784 | rs6253201   | 13 | 38829631 | C | C | C | C | C | C |
| 2785 | rs3701164   | 13 | 39243547 | T | T | T | A | T | T |
| 2786 | rs6379320   | 13 | 39489274 | A | A | A | G | A | A |
| 2787 | rs3700038   | 13 | 39820007 | A | A | A | G | A | A |
| 2788 | rs3722232   | 13 | 40040441 | A | G | G | A | A | G |
| 2789 | rs6213978   | 13 | 40182397 | G | G | G | G | G | G |
| 2790 | rs4229691   | 13 | 40465202 | G | G | G | G | G | G |
| 2791 | rs4229690   | 13 | 41056720 | C | C | C | C | C | C |
| 2792 | rs3725354   | 13 | 40574587 | G | G | G | A | G | G |
| 2793 | rs6350793   | 13 | 40575438 | G | G | G | A | G | G |
| 2794 | rs6162128   | 13 | 40774787 | A | A | A | A | A | A |
| 2795 | mCV22969866 | 13 | 42864639 | A | A | A | G | G | A |
| 2796 | rs3089478   | 13 | 41391520 | A | A | A | A | A | A |
| 2797 | rs6265536   | 13 | 41481623 | C | C | C | C | C | C |
| 2798 | rs6271232   | 13 | 41903543 | G | G | G | A | G | G |
| 2799 | rs3677720   | 13 | 41921003 | A | A | A | G | A | A |
| 2800 | rs2020805   | 13 | 42333911 | G | G | G | G | G | G |
| 2801 | rs6373215   | 13 | 42523480 | A | A | A | G | G | A |
| 2802 | rs3712907   | 13 | 42620079 | C | C | C | A | A | C |
| 2803 | rs3719648   | 13 | 42694778 | A | A | A | T | T | A |
| 2804 | rs3675293   | 13 | 42716137 | A | A | A | C | C | A |
| 2805 | rs3670127   | 13 | 42986342 | C | C | C | G | G | C |
| 2806 | rs6162782   | 13 | 42992074 | G | G | G | G | G | G |
| 2807 | rs6192767   | 13 | 43032625 | G | G | G | G | G | G |
| 2808 | rs3089333   | 13 | 43304918 | A | A | A | A | A | A |
| 2809 | rs3684719   | 13 | 43704533 | G | G | G | A | A | G |

|      |             |    |          |   |   |   |   |   |   |
|------|-------------|----|----------|---|---|---|---|---|---|
| 2810 | rs3685941   | 13 | 43775546 | G | G | G | A | A | G |
| 2811 | rs3090922   | 13 | 43780947 | G | G | G | G | G | G |
| 2812 | rs6356484   | 13 | 43840970 | A | A | A | G | G | A |
| 2813 | rs3023382   | 13 | 43860643 | C | C | C | A | A | C |
| 2814 | rs3691503   | 13 | 43995477 | A | A | A | G | G | A |
| 2815 | rs4229697   | 13 | 44220656 | G | G | G | G | G | G |
| 2816 | rs4229704   | 13 | 44314101 | G | G | G | G | G | G |
| 2817 | rs6249046   | 13 | 44557548 | A | A | A | G | G | A |
| 2818 | rs3089016   | 13 | 44681792 | A | A | A | A | A | A |
| 2819 | rs6196305   | 13 | 44771304 | G | G | G | A | G | G |
| 2820 | rs3661060   | 13 | 44811861 | C | C | C | A | C | C |
| 2821 | rs3688207   | 13 | 44823434 | A | G | G | A | G | G |
| 2822 | rs4229721   | 13 | 45011168 | A | A | A | A | G | A |
| 2823 | rs4229720   | 13 | 45011293 | G | G | G | G | A | G |
| 2824 | mCV22785372 | 13 | 47100064 | G | G | G | A | G | G |
| 2825 | rs3709108   | 13 | 45123833 | A | G | G | G | G | G |
| 2826 | rs3725387   | 13 | 45366723 | A | A | A | G | A | A |
| 2827 | rs3657836   | 13 | 45532817 | G | A | A | G | A | A |
| 2828 | rs6308694   | 13 | 45688433 | G | A | A | A | A | A |
| 2829 | rs3707420   | 13 | 45977425 | A | G | G | A | G | G |
| 2830 | rs6292911   | 13 | 46041913 | G | G | G | G | G | G |
| 2831 | rs4138314   | 13 | 46971558 | G | G | G | A | G | G |
| 2832 | rs6411274   | 13 | 46624183 | A | A | A | G | A | A |
| 2833 | rs3670228   | 13 | 46843400 | G | G | G | A | G | G |
| 2834 | rs3682400   | 13 | 47170242 | A | A | A | G | A | A |
| 2835 | rs3684250   | 13 | 47170532 | C | C | C | A | C | C |
| 2836 | rs3690108   | 13 | 47262499 | C | C | C | A | A | C |
| 2837 | rs6244558   | 13 | 47310947 | T | T | T | A | A | T |
| 2838 | rs3676930   | 13 | 47687184 | G | G | G | G | G | G |
| 2839 | rs4229730   | 13 | 48073882 | G | G | G | G | G | G |
| 2840 | mCV24538475 | 13 | 49385925 | C | C | C | C | C | C |
| 2841 | rs6349701   | 13 | 48383909 | G | G | G | G | G | G |
| 2842 | rs6291121   | 13 | 48886011 | A | A | A | A | A | A |
| 2843 | rs3090370   | 13 | 49119443 | A | A | A | A | A | A |
| 2844 | rs6385137   | 13 | 49689135 | G | G | G | G | G | G |
| 2845 | mCV23262360 | 13 | 52589947 | C | A | A | C | C | C |
| 2846 | rs6344027   | 13 | 51032933 | G | G | G | G | G | G |
| 2847 | rs4229742   | 13 | 51536262 | A | A | A | A | A | A |
| 2848 | rs6209128   | 13 | 51807160 | G | A | A | G | A | A |
| 2849 | rs3704459   | 13 | 51880566 | G | G | G | A | G | G |
| 2850 | rs3699522   | 13 | 52027179 | C | C | C | G | C | C |
| 2851 | rs4229749   | 13 | 52371785 | G | G | G | A | G | G |
| 2852 | rs3023086   | 13 | 52469453 | A | A | A | G | A | A |
| 2853 | rs3709215   | 13 | 52704111 | A | G | G | A | A | A |
| 2854 | rs3707721   | 13 | 52859852 | G | G | G | A | A | A |
| 2855 | rs6222262   | 13 | 52913812 | G | G | G | A | A | A |
| 2856 | rs3673174   | 13 | 53074279 | C | C | C | A | A | A |
| 2857 | rs8243445   | 13 | 53259175 | C | A | A | C | C | C |
| 2858 | rs3675767   | 13 | 53303366 | A | G | G | A | A | A |
| 2859 | rs6236102   | 13 | 53365843 | C | C | C | C | C | C |
| 2860 | rs4229756   | 13 | 53641500 | C | C | C | C | C | C |
| 2861 | rs6326507   | 13 | 54000197 | C | C | C | A | C | C |
| 2862 | rs3693942   | 13 | 54042656 | C | C | C | G | C | C |
| 2863 | mCV25176885 | 13 | 55806563 | A | C | C | A | A | A |
| 2864 | rs3675078   | 13 | 54123547 | A | G | G | A | A | A |
| 2865 | rs3683883   | 13 | 54202535 | A | G | G | G | A | A |
| 2866 | rs8267169   | 13 | 55175789 | G | A | A | A | G | A |
| 2867 | rs8267171   | 13 | 54488142 | G | G | G | G | G | G |
| 2868 | rs8267175   | 13 | 54488273 | C | C | C | C | C | C |
| 2869 | rs8273881   | 13 | 54488875 | G | G | G | A | G | A |
| 2870 | rs8273909   | 13 | 54535735 | G | G | G | G | G | G |
| 2871 | rs8273911   | 13 | 54535877 | A | A | A | A | A | A |
| 2872 | rs4229759   | 13 | 54603924 | G | A | A | G | G | G |
| 2873 | rs3698807   | 13 | 55044434 | G | G | G | A | G | A |
| 2874 | rs6305957   | 13 | 55174657 | G | G | G | G | G | G |
| 2875 | rs3720782   | 13 | 55330594 | A | A | A | G | A | G |
| 2876 | rs4232347   | 13 | 56066778 | C | A | A | C | C | C |
| 2877 | rs4232351   | 13 | 56066893 | A | A | A | A | A | A |
| 2878 | rs6272898   | 13 | 55401878 | C | A | A | A | C | A |
| 2879 | rs3697320   | 13 | 55466675 | G | G | G | A | G | A |
| 2880 | rs6372629   | 13 | 55557441 | T | T | T | A | T | A |
| 2881 | rs3700819   | 13 | 56358945 | G | G | G | A | G | A |
| 2882 | rs4229767   | 13 | 57156811 | G | G | G | G | G | G |
| 2883 | mCV22624058 | 13 | 58311395 | A | G | A | A | G | A |

|      |             |    |          |   |   |   |   |   |   |
|------|-------------|----|----------|---|---|---|---|---|---|
| 2884 | rs6391937   | 13 | 56578346 | A | C | C | C | A | C |
| 2885 | rs3700944   | 13 | 56939959 | A | A | G | A | G | A |
| 2886 | mCV23289546 | 13 | 59003784 | G | A | G | G | G | G |
| 2887 | rs6310690   | 13 | 57716148 | G | G | G | G | G | G |
| 2888 | rs3689106   | 13 | 57839808 | G | G | G | G | G | G |
| 2889 | rs6379978   | 13 | 57982535 | A | A | A | A | A | A |
| 2890 | mCV24581409 | 13 | 59106119 | G | A | G | G | G | G |
| 2891 | rs4184167   | 13 | 58491742 | A | A | A | A | G | G |
| 2892 | mCV25327808 | 13 | 60445103 | A | G | A | A | A | A |
| 2893 | rs3023383   | 13 | 59824860 | G | G | G | G | G | A |
| 2894 | rs6246599   | 13 | 59253663 | G | G | G | G | G | G |
| 2895 | rs8240205   | 13 | 59320792 | A | A | A | A | A | A |
| 2896 | rs6362489   | 13 | 59719172 | A | A | G | G | G | G |
| 2897 | rs6388524   | 13 | 59792763 | A | A | G | G | G | A |
| 2898 | rs3700164   | 13 | 59865002 | C | C | C | C | C | C |
| 2899 | rs4229799   | 13 | 60626795 | G | G | G | G | G | G |
| 2900 | rs3089437   | 13 | 60683700 | G | A | G | G | G | G |
| 2901 | mCV24354546 | 13 | 60961649 | G | G | A | A | A | G |
| 2902 | rs6410679   | 13 | 60401563 | A | G | A | A | A | A |
| 2903 | rs6279752   | 13 | 60625769 | T | A | T | T | T | T |
| 2904 | rs3670894   | 13 | 61291661 | A | A | G | G | G | G |
| 2905 | rs6255190   | 13 | 61332175 | A | A | T | T | A | A |
| 2906 | rs3090506   | 13 | 61645356 | G | G | G | G | G | G |
| 2907 | rs3708089   | 13 | 61820968 | C | C | A | A | C | C |
| 2908 | rs6400030   | 13 | 62289714 | T | T | T | A | T | T |
| 2909 | rs3655227   | 13 | 62306123 | A | A | G | A | G | A |
| 2910 | rs6220659   | 13 | 62537414 | G | G | G | A | G | G |
| 2911 | rs3678784   | 13 | 62597536 | A | A | A | C | A | A |
| 2912 | rs3697016   | 13 | 62715709 | G | G | G | C | G | C |
| 2913 | rs3668551   | 13 | 63044821 | A | G | A | A | G | A |
| 2914 | rs3720797   | 13 | 63102465 | G | G | A | G | G | G |
| 2915 | rs3657887   | 13 | 63277769 | A | A | A | C | A | A |
| 2916 | rs3712144   | 13 | 63566794 | G | G | G | A | G | G |
| 2917 | rs4229817   | 13 | 63888326 | G | A | A | G | A | A |
| 2918 | rs4229816   | 13 | 63888358 | G | G | G | G | G | G |
| 2919 | rs3693146   | 13 | 63944904 | A | C | C | C | C | C |
| 2920 | rs6283060   | 13 | 63968307 | G | G | G | A | G | G |
| 2921 | rs4229832   | 13 | 64004857 | G | G | G | G | G | G |
| 2922 | rs4229818   | 13 | 64005079 | A | A | A | G | A | A |
| 2923 | rs3670744   | 13 | 64048620 | G | A | A | G | A | A |
| 2924 | rs4229851   | 13 | 64464356 | G | G | G | G | G | G |
| 2925 | rs6273313   | 13 | 64487041 | A | A | A | G | A | A |
| 2926 | rs3664897   | 13 | 64504305 | C | A | C | A | C | A |
| 2927 | rs4137234   | 13 | 64547881 | G | A | G | G | G | A |
| 2928 | rs6188260   | 13 | 65249689 | G | G | G | G | G | G |
| 2929 | rs3662436   | 13 | 65251984 | G | G | G | A | G | G |
| 2930 | rs3714056   | 13 | 65306908 | A | A | A | G | A | A |
| 2931 | rs6283823   | 13 | 65381311 | T | T | T | A | T | T |
| 2932 | rs3670719   | 13 | 65519227 | G | G | G | A | G | G |
| 2933 | rs3718727   | 13 | 65760534 | A | G | A | G | A | G |
| 2934 | rs6367778   | 13 | 65798352 | G | G | G | A | G | G |
| 2935 | rs3683418   | 13 | 65931669 | G | G | G | A | G | G |
| 2936 | rs6239735   | 13 | 66052637 | G | G | G | A | G | G |
| 2937 | rs3672253   | 13 | 66166107 | C | G | G | G | G | G |
| 2938 | rs3672334   | 13 | 66166143 | A | A | A | G | A | A |
| 2939 | rs4229863   | 13 | 66254820 | T | T | T | T | T | T |
| 2940 | rs4229866   | 13 | 66255048 | C | C | C | A | C | C |
| 2941 | rs3694562   | 13 | 66407776 | A | A | A | G | A | A |
| 2942 | rs3710071   | 13 | 66430679 | A | A | A | G | A | A |
| 2943 | rs3657699   | 13 | 66449203 | G | G | G | A | G | G |
| 2944 | rs6280864   | 13 | 66517595 | A | A | A | G | A | A |
| 2945 | rs6360631   | 13 | 66606181 | G | G | A | A | A | G |
| 2946 | rs4229876   | 13 | 66645425 | A | A | A | A | A | A |
| 2947 | mCV23964641 | 13 | 63868572 | C | C | C | C | C | C |
| 2948 | rs6303725   | 13 | 67209961 | C | C | C | C | C | C |
| 2949 | rs3699272   | 13 | 67801964 | A | A | A | G | A | A |
| 2950 | rs3691609   | 13 | 67815260 | A | A | A | G | A | A |
| 2951 | rs3089497   | 13 | 67921466 | G | G | G | G | G | G |
| 2952 | rs6179438   | 13 | 68057256 | A | A | G | A | A | A |
| 2953 | rs3658685   | 13 | 68140298 | G | G | A | G | G | G |
| 2954 | mCV25299689 | 13 | 66142640 | G | G | G | A | G | G |
| 2955 | mCV25299687 | 13 | 66147365 | G | G | G | A | G | G |
| 2956 | mCV25299416 | 13 | 66147534 | A | A | A | G | A | A |
| 2957 | mCV25299415 | 13 | 66147589 | A | A | A | C | A | A |



|      |             |    |          |     |   |   |   |   |   |
|------|-------------|----|----------|-----|---|---|---|---|---|
| 2958 | mCV25299414 | 13 | 66151042 | G   | G | G | A | G | G |
| 2959 | mCV25299404 | 13 | 66151134 | G   | G | G | A | G | G |
| 2960 | mCV25299402 | 13 | 66152141 | C   | C | C | G | C | C |
| 2961 | mCV25299392 | 13 | 66152463 | A   | G | G | G | G | G |
| 2962 | mCV25299391 | 13 | 66154029 | G   | G | G | A | G | G |
| 2963 | mCV25299390 | 13 | 66154192 | A   | A | A | C | A | A |
| 2964 | mCV25299380 | 13 | 66154230 | G   | G | G | A | G | G |
| 2965 | mCV25299379 | 13 | 66154257 | A   | A | A | C | A | A |
| 2966 | mCV24560966 | 13 | 66155995 | G   | A | A | G | A | A |
| 2967 | mCV24560976 | 13 | 66158821 | A   | G | G | A | G | G |
| 2968 | mCV24560977 | 13 | 66158934 | A   | A | A | G | A | A |
| 2969 | mCV24560978 | 13 | 66159036 | G   | G | G | A | G | G |
| 2970 | mCV24560988 | 13 | 66159180 | A   | A | A | G | A | A |
| 2971 | mCV24561260 | 13 | 66160363 | A   | G | G | A | G | G |
| 2972 | mCV24561261 | 13 | 66160441 | C   | A | A | C | A | A |
| 2973 | mCV24561262 | 13 | 66160594 | A   | G | G | A | G | G |
| 2974 | mCV24561272 | 13 | 66160629 | C   | C | C | A | C | C |
| 2975 | mCV24561285 | 13 | 66160856 | G   | A | A | G | A | A |
| 2976 | mCV24561286 | 13 | 66160884 | G   | G | G | A | G | G |
| 2977 | mCV24561295 | 13 | 66160961 | A   | C | C | A | C | C |
| 2978 | mCV24561297 | 13 | 66161425 | A   | G | G | A | G | G |
| 2979 | mCV24561308 | 13 | 66161560 | G   | A | A | G | A | A |
| 2980 | mCV22672456 | 13 | 66162780 | A   | G | G | A | G | G |
| 2981 | mCV22672466 | 13 | 66163028 | A   | G | G | A | G | G |
| 2982 | mCV22672467 | 13 | 66163054 | A   | G | G | A | G | G |
| 2983 | mCV22672468 | 13 | 66163236 | G   | C | C | G | C | C |
| 2984 | mCV22672485 | 13 | 66164053 | G   | C | C | G | C | C |
| 2985 | mCV22672486 | 13 | 69069214 | C   | A | A | C | A | A |
| 2986 | rs3693854   | 13 | 68170811 | A   | A | G | A | A | A |
| 2987 | rs3694554   | 13 | 68170968 | A   | A | G | A | A | A |
| 2988 | mCV22672493 | 13 | 66164564 | A   | G | G | A | G | G |
| 2989 | mCV22672494 | 13 | 66164662 | G   | G | G | A | G | G |
| 2990 | mCV22672495 | 13 | 66164665 | A/G | A | A | G | A | A |
| 2991 | mCV22672502 | 13 | 66164765 | G   | G | G | A | G | G |
| 2992 | mCV22672517 | 13 | 66165091 | G   | G | G | A | G | G |
| 2993 | mCV22672518 | 13 | 66165247 | G   | G | G | A | G | G |
| 2994 | mCV22672519 | 13 | 66165275 | G   | G | G | A | G | G |
| 2995 | mCV22672528 | 13 | 66165298 | C   | C | C | A | C | C |
| 2996 | mCV22672715 | 13 | 66167189 | G   | G | G | A | G | G |
| 2997 | mCV22672716 | 13 | 66167295 | G   | G | G | A | G | G |
| 2998 | mCV22672727 | 13 | 66167989 | A   | A | A | T | A | A |
| 2999 | mCV22672728 | 13 | 66168361 | G   | G | G | C | G | G |
| 3000 | mCV22672738 | 13 | 66168543 | A   | G | G | G | G | G |
| 3001 | mCV22672739 | 13 | 66168837 | A   | G | G | G | G | G |
| 3002 | mCV22672750 | 13 | 66169845 | C   | A | A | A | A | A |
| 3003 | mCV22672752 | 13 | 66171934 | A   | G | A | G | A | G |
| 3004 | mCV22672762 | 13 | 66172053 | A   | A | G | G | G | A |
| 3005 | mCV22672763 | 13 | 66172061 | A   | A | A | G | A | A |
| 3006 | mCV22672764 | 13 | 66172103 | A   | G | G | G | G | G |
| 3007 | mCV22672774 | 13 | 66172955 | G   | G | G | A | G | G |
| 3008 | mCV22672775 | 13 | 66173062 | A   | A | A | T | A | A |
| 3009 | mCV22672973 | 13 | 66174600 | G   | G | A | G | A | G |
| 3010 | mCV22672974 | 13 | 66175026 | G   | G | G | A | G | G |
| 3011 | mCV22672975 | 13 | 66175162 | A   | A | A | G | A | A |
| 3012 | mCV22672985 | 13 | 66175183 | G   | G | G | A | G | G |
| 3013 | mCV22672997 | 13 | 66177903 | A   | G | G | A | G | G |
| 3014 | mCV22672998 | 13 | 66178014 | A   | G | G | A | G | G |
| 3015 | mCV24561309 | 13 | 66178845 | G   | A | A | G | A | A |
| 3016 | mCV24561331 | 13 | 66180479 | A   | C | C | A | C | C |
| 3017 | mCV22674574 | 13 | 66385617 | G   | A | A | G | A | A |
| 3018 | rs6346432   | 13 | 68550527 | C   | A | A | C | C | A |
| 3019 | rs3089535   | 13 | 68774221 | G   | G | G | G | G | G |
| 3020 | rs3722203   | 13 | 69035227 | A   | C | A | A | A | C |
| 3021 | rs4168094   | 13 | 69069571 | A   | G | G | A | A | G |
| 3022 | rs4168093   | 13 | 69069915 | A   | G | A | A | A | G |
| 3023 | rs3688781   | 13 | 69295263 | G   | A | A | G | G | A |
| 3024 | rs6395328   | 13 | 69674890 | G   | A | A | A | A | A |
| 3025 | rs3680359   | 13 | 69696881 | G   | A | A | A | A | A |
| 3026 | mCV24567210 | 13 | 68425157 | A   | T | T | A | A | T |
| 3027 | rs3721965   | 13 | 70436704 | G   | G | A | G | G | G |
| 3028 | rs4229899   | 13 | 70484661 | G   | G | G | G | G | G |
| 3029 | rs3090115   | 13 | 70662003 | C   | C | C | C | C | C |
| 3030 | rs4229913   | 13 | 70664876 | G   | G | G | G | G | G |
| 3031 | rs3680075   | 13 | 70797458 | A   | A | A | G | G | A |

|      |             |    |          |   |   |   |   |   |   |
|------|-------------|----|----------|---|---|---|---|---|---|
| 3032 | rs6245426   | 13 | 70799676 | C | C | C | C | C | C |
| 3033 | rs4229918   | 13 | 70809477 | C | A | C | C | C | A |
| 3034 | rs8279849   | 13 | 71104261 | G | G | G | G | G | G |
| 3035 | rs8279887   | 13 | 71114919 | A | A | A | A | A | A |
| 3036 | rs8279885   | 13 | 71121946 | G | G | G | G | G | G |
| 3037 | rs6291277   | 13 | 71254316 | G | G | G | A | A | G |
| 3038 | rs3723159   | 13 | 71286539 | G | G | G | A | A | G |
| 3039 | rs3670050   | 13 | 71297079 | G | G | G | C | C | G |
| 3040 | rs8274705   | 13 | 71554604 | A | A | A | G | G | A |
| 3041 | rs8267226   | 13 | 71572331 | A | A | A | A | A | A |
| 3042 | rs3674407   | 13 | 72230763 | A | A | A | G | A | A |
| 3043 | rs6227698   | 13 | 72227701 | A | A | A | G | A | A |
| 3044 | rs3703582   | 13 | 72324250 | A | A | A | G | A | A |
| 3045 | rs6237484   | 13 | 72465694 | G | G | G | A | G | G |
| 3046 | rs3673953   | 13 | 72510669 | G | G | G | A | G | G |
| 3047 | rs3722699   | 13 | 72735590 | G | G | G | A | G | G |
| 3048 | rs3716730   | 13 | 72770555 | C | C | C | G | G | C |
| 3049 | rs3708256   | 13 | 73021885 | A | A | A | G | A | A |
| 3050 | rs3681284   | 13 | 74470502 | A | A | A | G | A | A |
| 3051 | rs3678579   | 13 | 74494750 | G | G | G | A | G | G |
| 3052 | rs3724350   | 13 | 73699795 | A | A | A | G | A | A |
| 3053 | rs6372380   | 13 | 73703912 | G | G | G | A | G | G |
| 3054 | rs3679222   | 13 | 73989720 | A | A | A | G | A | A |
| 3055 | mCV24582540 | 13 | 72881657 | T | T | T | A | T | T |
| 3056 | rs6212230   | 13 | 74589200 | G | A | A | A | G | A |
| 3057 | rs3677220   | 13 | 74616016 | T | A | T | A | T | A |
| 3058 | rs3706924   | 13 | 74621387 | G | G | A | G | A | G |
| 3059 | mCV23400160 | 13 | 73445492 | C | A | C | C | A | A |
| 3060 | rs3688040   | 13 | 74718183 | A | G | A | G | A | G |
| 3061 | rs3683740   | 13 | 75110557 | G | G | A | G | A | G |
| 3062 | rs6248891   | 13 | 75238350 | G | A | A | A | A | A |
| 3063 | rs3089521   | 13 | 75266424 | A | A | A | A | A | A |
| 3064 | rs3697007   | 13 | 75548389 | C | A | C | A | C | A |
| 3065 | rs6315553   | 13 | 75668989 | A | A | G | A | G | A |
| 3066 | rs3705043   | 13 | 76009925 | G | G | A | G | A | G |
| 3067 | rs6220666   | 13 | 76304682 | C | C | C | C | C | C |
| 3068 | rs3713411   | 13 | 76413109 | G | A | A | A | A | A |
| 3069 | rs6268498   | 13 | 76611652 | A | A | A | A | A | A |
| 3070 | rs6222317   | 13 | 77099591 | G | G | G | G | G | G |
| 3071 | rs3693887   | 13 | 77224812 | G | G | A | G | A | G |
| 3072 | rs3705446   | 13 | 77327201 | A | G | A | G | A | G |
| 3073 | rs3722797   | 13 | 77535890 | C | A | C | A | C | A |
| 3074 | rs6357295   | 13 | 77657697 | G | G | G | G | G | G |
| 3075 | rs6158872   | 13 | 78380467 | G | G | G | G | G | G |
| 3076 | rs3686754   | 13 | 78463997 | G | G | G | A | G | G |
| 3077 | rs3682670   | 13 | 78716907 | G | G | G | A | G | G |
| 3078 | rs3726588   | 13 | 78728885 | G | G | G | G | G | G |
| 3079 | rs3684993   | 13 | 79103786 | A | C | A | C | A | A |
| 3080 | rs6195556   | 13 | 79116316 | A | A | A | G | A | A |
| 3081 | rs3702812   | 13 | 79529017 | G | G | G | A | G | G |
| 3082 | mCV24607819 | 13 | 78579358 | A | G | A | A | A | A |
| 3083 | rs6212654   | 13 | 79781803 | G | G | G | A | G | G |
| 3084 | rs6304752   | 13 | 81426036 | G | G | A | G | A | A |
| 3085 | rs6321551   | 13 | 81453706 | G | G | G | G | G | G |
| 3086 | rs3669221   | 13 | 80367567 | A | G | A | G | A | A |
| 3087 | rs3719251   | 13 | 80399420 | G | G | G | A | G | G |
| 3088 | rs3710483   | 13 | 80757207 | A | G | A | G | A | A |
| 3089 | rs3674364   | 13 | 80943119 | G | A | G | A | A | A |
| 3090 | rs3665771   | 13 | 81416102 | G | A | A | A | A | A |
| 3091 | rs3716022   | 13 | 81699041 | A | G | G | A | G | G |
| 3092 | rs6304393   | 13 | 81700173 | A | C | C | A | C | C |
| 3093 | rs3714314   | 13 | 81721563 | A | T | T | A | T | T |
| 3094 | rs3659653   | 13 | 81826486 | C | A | A | C | A | A |
| 3095 | rs6245977   | 13 | 82197498 | G | A | A | G | A | G |
| 3096 | mCV24625340 | 13 | 81332738 | G | A | G | G | A | A |
| 3097 | rs3693027   | 13 | 82543444 | A | A | A | G | A | A |
| 3098 | rs3678699   | 13 | 82859266 | T | A | A | A | T | T |
| 3099 | rs6377863   | 13 | 83050327 | T | T | T | T | T | T |
| 3100 | rs6378492   | 13 | 83050468 | A | A | A | A | A | A |
| 3101 | rs3686443   | 13 | 83174585 | A | C | A | C | A | C |
| 3102 | rs3668894   | 13 | 83176850 | G | A | G | A | G | A |
| 3103 | rs6296621   | 13 | 83614426 | A | A | A | A | A | T |
| 3104 | rs6177298   | 13 | 83746245 | A | A | C | A | C | C |
| 3105 | rs6250834   | 13 | 84248141 | G | G | G | A | G | G |

|      |             |    |          |      |   |   |   |   |   |
|------|-------------|----|----------|------|---|---|---|---|---|
| 3106 | mCV23244638 | 13 | 83381156 | G    | A | G | G | G | A |
| 3107 | rs6290670   | 13 | 84600795 | G    | G | G | G | G | G |
| 3108 | mCV24423497 | 13 | 83833399 | C    | A | C | C | C | C |
| 3109 | rs6288318   | 13 | 85598382 | A    | A | A | A | A | A |
| 3110 | rs3685298   | 13 | 86080336 | A    | A | A | G | A | A |
| 3111 | rs6223431   | 13 | 86155637 | A    | A | A | C | A | A |
| 3112 | rs8256640   | 13 | 86198114 | G    | G | G | G | G | G |
| 3113 | rs3655061   | 13 | 86241392 | A    | A | G | G | G | G |
| 3114 | rs6353311   | 13 | 86436799 | G    | G | G | G | G | G |
| 3115 | mCV24394003 | 13 | 83946056 | C    | A | A | C | A | A |
| 3116 | rs3657904   | 13 | 86644738 | A    | T | T | T | T | T |
| 3117 | rs3711987   | 13 | 86734941 | A    | A | A | A | A | A |
| 3118 | rs6330373   | 13 | 86895733 | A    | A | A | A | A | A |
| 3119 | rs3665985   | 13 | 87090246 | A    | T | T | A | T | T |
| 3120 | mCV22765543 | 13 | 84700245 | A    | A | A | T | A | A |
| 3121 | rs3723645   | 13 | 87372256 | A    | G | G | A | G | A |
| 3122 | rs6396708   | 13 | 88054253 | A    | A | A | A | A | A |
| 3123 | rs3090244   | 13 | 88457036 | A    | A | A | A | A | A |
| 3124 | rs4229929   | 13 | 88462114 | G    | G | G | G | G | G |
| 3125 | rs6316213   | 13 | 88817196 | A    | G | G | G | A | A |
| 3126 | rs3090591   | 13 | 88919916 | G    | G | A | G | G | G |
| 3127 | rs3700592   | 13 | 89049961 | C    | C | C | C | C | C |
| 3128 | rs6281579   | 13 | 89116059 | G    | G | G | G | G | G |
| 3129 | rs4229947   | 13 | 89195540 | A    | A | A | A | A | A |
| 3130 | rs4229951   | 13 | 89195671 | C    | C | C | C | C | C |
| 3131 | rs3667936   | 13 | 89228545 | G    | G | A | G | G | G |
| 3132 | rs3660654   | 13 | 89444417 | C    | C | C | A | C | C |
| 3133 | rs3701970   | 13 | 89950154 | G    | G | G | A | G | G |
| 3134 | rs3088471   | 13 | 90090575 | G    | G | G | G | G | G |
| 3135 | rs6293159   | 13 | 90158795 | G    | G | G | G | G | G |
| 3136 | rs3719701   | 13 | 90463735 | A    | A | A | C | A | A |
| 3137 | rs6364017   | 13 | 90523270 | A    | A | A | A | A | A |
| 3138 | rs3697202   | 13 | 90525106 | G    | A | G | A | G | G |
| 3139 | rs4229968   | 13 | 90669935 | G    | G | G | G | G | G |
| 3140 | rs6268154   | 13 | 91751636 | A    | A | A | A | A | A |
| 3141 | rs4229973   | 13 | 92003955 | A    | A | A | A | A | A |
| 3142 | rs4229972   | 13 | 92004037 | A    | A | A | A | A | A |
| 3143 | rs4229970   | 13 | 92004194 | G    | G | G | G | G | G |
| 3144 | rs3023386   | 13 | 92287042 | A    | A | G | G | G | G |
| 3145 | rs4229998   | 13 | 92334391 | C    | C | C | C | C | C |
| 3146 | rs4230010   | 13 | 92433517 | G    | G | A | G | A | A |
| 3147 | rs4230017   | 13 | 92433844 | C    | C | C | C | C | C |
| 3148 | rs3690969   | 13 | 92508085 | A    | A | A | G | A | A |
| 3149 | rs3688344   | 13 | 92540561 | C    | C | C | G | C | C |
| 3150 | rs6304527   | 13 | 92748300 | NONE | A | A | A | A | A |
| 3151 | rs3696278   | 13 | 93118849 | T    | A | T | A | T | T |
| 3152 | rs6260303   | 13 | 93235132 | G    | G | G | G | G | G |
| 3153 | rs6268913   | 13 | 93884972 | A    | A | A | A | A | A |
| 3154 | rs3662543   | 13 | 94591366 | G    | A | G | A | A | G |
| 3155 | rs6244059   | 13 | 94592492 | C    | C | C | C | C | C |
| 3156 | rs3673640   | 13 | 94621276 | G    | A | G | A | A | G |
| 3157 | rs4230018   | 13 | 94662358 | G    | G | G | G | G | G |
| 3158 | rs2020720   | 13 | 94690410 | G    | G | G | G | G | G |
| 3159 | rs3667356   | 13 | 94846583 | G    | A | G | A | A | G |
| 3160 | rs6241433   | 13 | 95127428 | A    | A | A | A | A | A |
| 3161 | rs3692326   | 13 | 95285255 | G    | G | G | C | C | G |
| 3162 | rs4135523   | 13 | 95781992 | A    | G | G | G | A | G |
| 3163 | rs3089073   | 13 | 95833496 | C    | C | C | C | C | C |
| 3164 | rs3706705   | 13 | 95944170 | G    | G | G | A | A | G |
| 3165 | rs3666983   | 13 | 96125826 | G    | G | G | A | G | G |
| 3166 | rs3088752   | 13 | 96707224 | A    | G | G | A | A | G |
| 3167 | rs3088753   | 13 | 96707258 | G    | G | G | G | G | G |
| 3168 | rs3703332   | 13 | 96732558 | A    | G | G | G | G | G |
| 3169 | rs6196633   | 13 | 96803410 | A    | A | A | A | A | A |
| 3170 | rs4230019   | 13 | 96883287 | A    | A | A | A | A | A |
| 3171 | rs4230027   | 13 | 97200857 | G    | G | C | C | G | C |
| 3172 | rs6192828   | 13 | 97583932 | T    | A | T | T | T | T |
| 3173 | mCV25103990 | 13 | 95396576 | A    | C | C | A | C | C |
| 3174 | rs3697911   | 13 | 97793542 | A    | A | T | T | T | T |
| 3175 | rs3714142   | 13 | 98019774 | A    | A | T | A | A | A |
| 3176 | rs3657160   | 13 | 98020136 | G    | G | A | G | G | G |
| 3177 | mCV23729185 | 13 | 96187387 | G    | A | A | G | A | A |
| 3178 | rs3702451   | 13 | 98846673 | A    | A | A | G | A | A |
| 3179 | rs3698307   | 13 | 98868566 | A    | A | A | G | A | A |

|      |             |    |           |   |   |   |   |   |   |
|------|-------------|----|-----------|---|---|---|---|---|---|
| 3180 | rs3711084   | 13 | 99036251  | A | G | A | G | A | A |
| 3181 | rs6361976   | 13 | 99050056  | G | G | G | G | G | G |
| 3182 | rs3690822   | 13 | 99203909  | C | G | C | G | C | C |
| 3183 | rs3706962   | 13 | 99204294  | A | G | A | G | A | A |
| 3184 | rs3665205   | 13 | 99210029  | A | G | A | G | A | A |
| 3185 | rs6244347   | 13 | 99298959  | G | G | G | G | G | G |
| 3186 | rs3655295   | 13 | 99397142  | A | C | A | C | A | A |
| 3187 | rs3688959   | 13 | 99855781  | G | G | G | A | G | G |
| 3188 | rs3705092   | 13 | 100020595 | G | A | G | A | A | G |
| 3189 | rs3703132   | 13 | 100303739 | G | G | G | A | A | G |
| 3190 | rs3705003   | 13 | 100833770 | G | G | A | G | G | G |
| 3191 | rs3660412   | 13 | 101204106 | A | A | G | A | A | A |
| 3192 | rs6341216   | 13 | 101540040 | A | A | A | A | A | A |
| 3193 | rs3089152   | 13 | 101867025 | C | C | C | C | C | C |
| 3194 | rs6298013   | 13 | 102514157 | A | A | A | A | A | A |
| 3195 | rs3700495   | 13 | 103165238 | T | T | T | A | T | T |
| 3196 | rs6337318   | 13 | 103440365 | G | G | G | G | G | G |
| 3197 | rs3719887   | 13 | 103498757 | G | G | G | A | G | G |
| 3198 | rs3678856   | 13 | 105521730 | C | C | A | C | C | C |
| 3199 | rs3687057   | 13 | 103792288 | A | A | A | G | A | G |
| 3200 | rs3692862   | 13 | 103988456 | C | A | C | A | C | A |
| 3201 | rs4230039   | 13 | 104241493 | T | T | T | T | T | T |
| 3202 | rs3679406   | 13 | 104451097 | T | T | T | A | T | T |
| 3203 | rs6356070   | 13 | 104476044 | G | G | G | G | G | G |
| 3204 | rs3678312   | 13 | 104801223 | A | G | G | A | G | G |
| 3205 | rs3676344   | 13 | 104904828 | A | C | C | C | C | C |
| 3206 | rs6337278   | 13 | 105147948 | A | A | A | A | A | A |
| 3207 | rs3697753   | 13 | 105190213 | C | C | C | A | C | C |
| 3208 | rs6306874   | 13 | 105868690 | G | G | G | G | G | G |
| 3209 | rs3701614   | 13 | 106123894 | C | A | A | C | A | A |
| 3210 | rs3681990   | 13 | 106468932 | A | A | C | A | C | A |
| 3211 | rs3682619   | 13 | 106469035 | A | A | T | A | T | A |
| 3212 | rs6324165   | 13 | 106557906 | A | A | A | A | A | A |
| 3213 | rs6406875   | 13 | 106942423 | A | A | A | A | A | A |
| 3214 | rs3660764   | 13 | 107347748 | A | A | A | G | A | A |
| 3215 | rs6284766   | 13 | 107766653 | A | A | A | A | A | A |
| 3216 | mCV24457033 | 13 | 105409171 | C | C | C | A | C | C |
| 3217 | rs4230046   | 13 | 108358972 | C | C | C | C | C | C |
| 3218 | rs4230050   | 13 | 108651347 | A | A | A | A | A | A |
| 3219 | rs3668922   | 13 | 108704702 | A | A | G | A | G | G |
| 3220 | rs3722415   | 13 | 108786768 | A | A | G | A | G | G |
| 3221 | rs4222698   | 13 | 108816291 | A | G | A | A | A | A |
| 3222 | rs6224742   | 13 | 108944165 | A | A | A | A | A | A |
| 3223 | rs3090595   | 13 | 109443015 | G | G | G | G | G | A |
| 3224 | rs4230072   | 13 | 109678103 | G | A | G | G | G | A |
| 3225 | rs4230062   | 13 | 109678284 | G | G | G | G | G | G |
| 3226 | rs3711004   | 13 | 109743953 | A | A | A | G | A | A |
| 3227 | mCV24886326 | 13 | 107388334 | A | G | G | A | A | G |
| 3228 | rs6277674   | 13 | 110101636 | A | C | A | A | A | C |
| 3229 | rs4230103   | 13 | 110162088 | A | A | A | A | A | A |
| 3230 | rs4230105   | 13 | 110162156 | A | C | A | A | A | C |
| 3231 | rs6184735   | 13 | 110201540 | G | G | G | A | G | G |
| 3232 | rs3023392   | 13 | 110663989 | A | G | A | A | A | G |
| 3233 | rs3088544   | 13 | 110878417 | G | G | G | G | G | G |
| 3234 | rs6329103   | 13 | 111900029 | A | A | A | A | A | A |
| 3235 | rs4230108   | 13 | 112039479 | G | G | G | G | G | G |
| 3236 | rs6316705   | 13 | 112888923 | A | A | A | G | A | A |
| 3237 | rs3088696   | 13 | 113136546 | G | A | G | G | G | G |
| 3238 | rs3658551   | 13 | 113211634 | C | G | C | G | C | C |
| 3239 | rs3656762   | 13 | 113290130 | C | C | C | A | C | C |
| 3240 | rs3657450   | 13 | 113290258 | G | G | G | A | G | G |
| 3241 | rs3657414   | 13 | 113498433 | C | G | C | G | C | G |
| 3242 | rs3708958   | 13 | 113621613 | A | G | A | G | A | G |
| 3243 | rs6308995   | 13 | 113876215 | G | A | G | G | G | G |
| 3244 | rs3089097   | 13 | 114010147 | A | A | A | A | A | A |
| 3245 | rs6190884   | 13 | 114285431 | A | G | A | A | A | A |
| 3246 | rs3659752   | 13 | 114469156 | G | G | G | G | G | A |
| 3247 | rs3685525   | 13 | 114754518 | A | G | A | G | A | G |
| 3248 | rs3676640   | 13 | 114819954 | C | G | C | G | C | G |
| 3249 | rs3708633   | 13 | 115714989 | A | G | A | A | A | G |
| 3250 | rs3717171   | 13 | 116065408 | C | A | C | C | C | A |
| 3251 | rs3700781   | 13 | 116244235 | A | G | A | G | A | G |
| 3252 | rs3675054   | 13 | 116386374 | G | A | G | A | G | A |
| 3253 | rs6163712   | 13 | 116415524 | G | A | G | A | G | A |

|      |             |    |           |      |   |   |   |   |   |
|------|-------------|----|-----------|------|---|---|---|---|---|
| 3254 | mCV24995296 | 13 | 115386703 | C    | A | C | C | C | A |
| 3255 | mCV24397011 | 13 | 121083641 | G    | A | G | A | G | A |
| 3256 | rs3157619   | 14 | 45354253  | G    | G | G | A | G | A |
| 3257 | rs3155343   | 14 | 46051225  | C    | C | C | G | C | C |
| 3258 | rs3155490   | 14 | 46113760  | A    | A | A | G | A | A |
| 3259 | rs3155532   | 14 | 46147873  | T    | T | T | T | T | T |
| 3260 | rs3701221   | 14 | 1392385   | G    | A | A | A | A | A |
| 3261 | rs6335460   | 14 | 1631502   | G    | A | A | A | A | A |
| 3262 | mCV22823923 | 14 | 7199542   | A    | A | A | A | A | A |
| 3263 | rs3710916   | 14 | 3818468   | C    | A | C | A | C | C |
| 3264 | rs3712828   | 14 | 3834607   | A    | G | A | G | A | A |
| 3265 | rs4230148   | 14 | 3890360   | A    | A | T | A | T | T |
| 3266 | rs4230174   | 14 | 4020807   | C    | C | C | C | C | C |
| 3267 | rs4230179   | 14 | 4231703   | T    | A | A | A | A | A |
| 3268 | rs3088788   | 14 | 5163382   | G    | G | G | G | G | G |
| 3269 | rs6314527   | 14 | 5206071   | G    | A | G | A | G | G |
| 3270 | rs3689508   | 14 | 5056273   | T    | A | T | A | T | T |
| 3271 | rs6322899   | 14 | 5945767   | C    | A | C | A | C | C |
| 3272 | rs3722946   | 14 | 5972840   | G    | A | G | A | G | G |
| 3273 | rs4224037   | 14 | 5193065   | NONE | G | G | G | G | G |
| 3274 | rs3150398   | 14 | 7401248   | A    | G | A | G | A | G |
| 3275 | rs6216285   | 14 | 7406798   | G    | A | G | A | G | A |
| 3276 | rs3672461   | 14 | 7512933   | G    | A | G | A | G | G |
| 3277 | rs6209858   | 14 | 7634631   | A    | G | A | G | A | G |
| 3278 | rs3701693   | 14 | 7742476   | G    | A | A | A | G | G |
| 3279 | rs6352512   | 14 | 7805601   | T    | A | T | A | T | T |
| 3280 | rs2020746   | 14 | 7811476   | G    | G | G | G | G | G |
| 3281 | rs3660068   | 14 | 8300488   | G    | A | G | A | G | A |
| 3282 | rs3692295   | 14 | 8551876   | A    | G | A | G | A | G |
| 3283 | rs6372890   | 14 | 8630291   | A    | G | A | G | A | G |
| 3284 | rs6260786   | 14 | 8690102   | G    | A | G | A | G | A |
| 3285 | mCV25318929 | 14 | 11797878  | A    | G | A | G | A | G |
| 3286 | rs3687346   | 14 | 9419393   | G    | A | G | A | G | A |
| 3287 | rs3669812   | 14 | 9511120   | A    | G | A | G | A | G |
| 3288 | rs4135584   | 14 | 9534998   | G    | A | A | A | G | A |
| 3289 | rs6238270   | 14 | 9615248   | A    | G | A | G | A | G |
| 3290 | rs3676100   | 14 | 9916017   | C    | A | C | A | C | A |
| 3291 | rs3090818   | 14 | 10437204  | A    | G | A | G | A | G |
| 3292 | rs6158384   | 14 | 10700688  | T    | A | T | A | T | A |
| 3293 | rs4230185   | 14 | 10720045  | G    | A | A | A | G | A |
| 3294 | rs3662587   | 14 | 10723797  | A    | G | G | A | A | A |
| 3295 | rs6408107   | 14 | 10733122  | A    | G | A | G | A | G |
| 3296 | rs3663932   | 14 | 11083772  | A    | G | A | G | A | G |
| 3297 | rs3687734   | 14 | 11212297  | A    | T | A | A | A | A |
| 3298 | rs6253513   | 14 | 11413304  | A    | G | A | G | A | G |
| 3299 | rs3089460   | 14 | 11462511  | G    | G | G | G | G | G |
| 3300 | rs3698600   | 14 | 11672488  | G    | A | G | A | G | A |
| 3301 | rs3709444   | 14 | 11917608  | A    | C | A | C | A | C |
| 3302 | rs3668355   | 14 | 12039779  | G    | G | G | G | G | G |
| 3303 | rs3709839   | 14 | 12058026  | G    | A | G | A | G | A |
| 3304 | rs6393665   | 14 | 12343760  | G    | G | G | A | G | A |
| 3305 | rs3667005   | 14 | 12362340  | A    | G | A | G | A | G |
| 3306 | rs3719629   | 14 | 12874743  | A    | A | A | G | A | G |
| 3307 | rs4230192   | 14 | 12889440  | G    | G | G | G | G | G |
| 3308 | rs6294895   | 14 | 13087232  | A    | G | A | G | A | G |
| 3309 | rs3672910   | 14 | 13126901  | T    | A | T | A | T | A |
| 3310 | rs3725901   | 14 | 13354145  | G    | A | G | A | G | A |
| 3311 | mCV25245448 | 14 | 11979126  | A    | G | A | G | A | G |
| 3312 | mCV23857686 | 14 | 12055982  | G    | A | G | A | G | A |
| 3313 | rs3703111   | 14 | 13431501  | A    | G | A | G | A | G |
| 3314 | rs3653743   | 14 | 13764493  | A    | T | A | T | A | T |
| 3315 | rs3696385   | 14 | 14028895  | G    | A | G | A | G | A |
| 3316 | rs3686093   | 14 | 14064387  | A    | G | A | G | A | G |
| 3317 | rs6238607   | 14 | 14070911  | G    | A | G | A | G | A |
| 3318 | rs3678171   | 14 | 14316750  | G    | A | G | A | G | A |
| 3319 | rs3691434   | 14 | 14340550  | A    | G | A | G | A | G |
| 3320 | rs6413339   | 14 | 14709385  | G    | A | G | A | G | A |
| 3321 | rs6304332   | 14 | 14953078  | A    | G | A | G | A | G |
| 3322 | rs6316987   | 14 | 14953203  | A    | T | A | T | A | T |
| 3323 | rs3669652   | 14 | 15233317  | A    | G | A | G | A | G |
| 3324 | rs3663068   | 14 | 15403925  | C    | G | C | G | C | G |
| 3325 | rs3706433   | 14 | 15772934  | A    | G | A | G | A | G |
| 3326 | rs3687889   | 14 | 15973497  | G    | A | A | A | A | G |
| 3327 | rs6206888   | 14 | 16442172  | T    | T | T | T | T | T |

|      |             |    |          |     |   |   |   |   |   |
|------|-------------|----|----------|-----|---|---|---|---|---|
| 3328 | rs6201943   | 14 | 17277171 | G   | G | G | G | G | G |
| 3329 | rs4230197   | 14 | 17320789 | G   | G | G | G | G | G |
| 3330 | rs3696019   | 14 | 17329455 | A   | G | G | G | A | A |
| 3331 | rs4230205   | 14 | 17736333 | A   | A | A | A | A | A |
| 3332 | rs3719797   | 14 | 17912717 | C   | G | G | G | C | C |
| 3333 | rs3690631   | 14 | 18039858 | A   | C | C | C | A | A |
| 3334 | rs6364305   | 14 | 18180003 | C   | C | C | C | C | C |
| 3335 | rs4230209   | 14 | 18272049 | A   | G | A | G | A | A |
| 3336 | rs3683585   | 14 | 18655239 | A   | C | A | C | A | A |
| 3337 | rs3706988   | 14 | 18705106 | G   | A | G | A | G | G |
| 3338 | rs6255409   | 14 | 18901784 | G   | G | G | G | G | G |
| 3339 | rs6395691   | 14 | 19311842 | A   | A | A | A | A | A |
| 3340 | mCV25031515 | 14 | 20803715 | C   | C | C | C | C | C |
| 3341 | rs3666933   | 14 | 19944914 | G   | G | G | G | G | G |
| 3342 | rs3692121   | 14 | 20092583 | G   | A | A | A | A | G |
| 3343 | rs6159306   | 14 | 20137823 | C   | A | A | A | A | C |
| 3344 | rs4230220   | 14 | 20597651 | G   | G | G | G | G | G |
| 3345 | rs4230217   | 14 | 20597784 | A   | A | A | A | A | A |
| 3346 | rs6336257   | 14 | 20887726 | A   | A | A | A | A | A |
| 3347 | rs6252078   | 14 | 21518064 | A   | A | A | A | A | A |
| 3348 | rs3682880   | 14 | 21635758 | G   | G | G | A | A | G |
| 3349 | rs6300900   | 14 | 22401046 | A   | A | A | A | A | A |
| 3350 | rs6323944   | 14 | 22939869 | G   | G | G | A | A | G |
| 3351 | rs4230230   | 14 | 22955528 | G   | G | G | A | A | G |
| 3352 | rs4230234   | 14 | 22955860 | G   | G | G | G | G | G |
| 3353 | rs3709400   | 14 | 23043000 | A   | A | A | G | G | A |
| 3354 | rs6399023   | 14 | 23142935 | G   | G | G | A | A | G |
| 3355 | rs3682024   | 14 | 23190762 | G   | G | G | A | A | G |
| 3356 | rs3697334   | 14 | 23407342 | G   | A | A | G | G | A |
| 3357 | rs3712886   | 14 | 23407595 | A   | G | A | A | A | G |
| 3358 | rs3663052   | 14 | 23438539 | G   | A | A | G | G | A |
| 3359 | rs3653376   | 14 | 23793812 | G   | A | A | G | G | A |
| 3360 | rs6396829   | 14 | 24042337 | G   | A | A | G | G | A |
| 3361 | rs3693175   | 14 | 24191935 | G   | G | G | A | A | G |
| 3362 | rs3658622   | 14 | 24451733 | A   | A | A | C | C | A |
| 3363 | rs3694569   | 14 | 24767060 | G   | G | G | A | A | G |
| 3364 | rs6244569   | 14 | 24946671 | G   | G | G | A | A | G |
| 3365 | rs3697466   | 14 | 25387014 | C   | C | C | A | A | C |
| 3366 | rs3720154   | 14 | 25388425 | A   | A | A | G | G | A |
| 3367 | rs3090249   | 14 | 25500482 | A   | A | A | A | A | A |
| 3368 | rs3662499   | 14 | 25549165 | A   | A | A | G | G | A |
| 3369 | rs3700898   | 14 | 25550835 | C   | C | C | G | G | C |
| 3370 | rs3692165   | 14 | 25658744 | T   | T | T | A | A | T |
| 3371 | rs6159786   | 14 | 25722967 | T   | T | T | A | A | T |
| 3372 | rs4230236   | 14 | 26076151 | A   | A | A | A | A | A |
| 3373 | rs4230239   | 14 | 26076242 | A/G | G | G | G | G | G |
| 3374 | rs3709612   | 14 | 26381068 | A   | G | G | A | A | G |
| 3375 | rs6204667   | 14 | 26649815 | A   | G | G | A | A | G |
| 3376 | rs3678167   | 14 | 26920306 | A   | G | G | A | A | G |
| 3377 | rs3681994   | 14 | 26930317 | G   | A | A | G | G | A |
| 3378 | rs4230248   | 14 | 27218513 | G   | A | A | A | G | A |
| 3379 | rs6215014   | 14 | 27222493 | G   | A | A | A | G | A |
| 3380 | rs3661446   | 14 | 27519273 | G   | A | A | A | A | A |
| 3381 | rs4230249   | 14 | 27544435 | G   | G | G | G | G | G |
| 3382 | rs6313230   | 14 | 28306368 | G   | A | A | A | A | A |
| 3383 | rs3668823   | 14 | 28502233 | A   | G | G | G | G | G |
| 3384 | rs4230261   | 14 | 28880295 | C   | C | C | C | C | C |
| 3385 | rs3089138   | 14 | 29085318 | A   | A | A | A | A | A |
| 3386 | rs6248627   | 14 | 29163155 | A   | G | G | G | A | G |
| 3387 | rs6396413   | 14 | 29196132 | G   | A | A | A | G | A |
| 3388 | rs3719001   | 14 | 29373364 | G   | A | A | A | A | A |
| 3389 | rs3695383   | 14 | 29838823 | A   | G | G | G | A | G |
| 3390 | rs6209572   | 14 | 30117875 | A   | G | G | G | G | G |
| 3391 | rs4230265   | 14 | 30145682 | G   | G | G | G | G | G |
| 3392 | rs4230273   | 14 | 30145864 | A/G | G | G | G | G | G |
| 3393 | rs3699386   | 14 | 30709023 | A   | G | G | G | G | G |
| 3394 | rs6335438   | 14 | 30990293 | A   | G | G | G | G | G |
| 3395 | rs4136381   | 14 | 31156721 | G   | A | A | A | A | A |
| 3396 | rs6303687   | 14 | 32384582 | A   | C | C | C | C | C |
| 3397 | rs3654283   | 14 | 32559577 | A   | G | G | G | G | G |
| 3398 | rs3722090   | 14 | 32565225 | G   | A | A | A | G | A |
| 3399 | rs4151922   | 14 | 32914232 | G   | G | G | G | G | G |
| 3400 | rs3702083   | 14 | 33145529 | A   | G | G | G | G | G |
| 3401 | rs3682128   | 14 | 33302372 | A   | C | C | C | C | C |

|      |             |    |          |   |   |   |   |   |      |
|------|-------------|----|----------|---|---|---|---|---|------|
| 3402 | rs3701775   | 14 | 33391532 | A | G | G | G | G | G    |
| 3403 | rs3089928   | 14 | 33407037 | A | A | A | A | A | A    |
| 3404 | rs6256359   | 14 | 34144327 | T | T | T | T | T | T    |
| 3405 | mCV24456561 | 14 | 36005447 | C | C | C | C | G | C    |
| 3406 | rs6369028   | 14 | 34869678 | A | A | A | A | A | A    |
| 3407 | rs6329922   | 14 | 35903350 | T | T | T | T | A | T    |
| 3408 | rs6314716   | 14 | 36663352 | G | G | G | G | A | G    |
| 3409 | rs4230290   | 14 | 36960207 | T | T | T | T | T | T    |
| 3410 | rs8266325   | 14 | 37191379 | G | G | G | G | A | G    |
| 3411 | rs8266166   | 14 | 37238440 | A | A | A | A | A | A    |
| 3412 | rs8266165   | 14 | 37238559 | G | G | G | G | G | G    |
| 3413 | rs6397156   | 14 | 37477851 | A | A | A | A | A | A    |
| 3414 | rs4230294   | 14 | 38117147 | C | C | C | C | C | C    |
| 3415 | rs6169079   | 14 | 38214273 | A | A | A | A | G | A    |
| 3416 | rs3714840   | 14 | 38323598 | C | C | C | A | C | C    |
| 3417 | rs3689053   | 14 | 38368354 | G | G | G | A | G | G    |
| 3418 | rs3689402   | 14 | 38433817 | G | G | G | A | A | G    |
| 3419 | rs6175724   | 14 | 38738213 | G | G | G | A | G | G    |
| 3420 | rs3671357   | 14 | 38756818 | A | A | A | G | G | A    |
| 3421 | rs3685027   | 14 | 38971494 | G | G | G | A | G | G    |
| 3422 | rs3671603   | 14 | 39023864 | A | A | A | C | A | A    |
| 3423 | rs8236887   | 14 | 39045462 | A | A | A | G | A | A    |
| 3424 | rs8244064   | 14 | 39046026 | A | A | A | G | A | A    |
| 3425 | rs8236394   | 14 | 39046618 | A | A | A | G | A | A    |
| 3426 | rs8236888   | 14 | 39047096 | C | C | C | G | C | C    |
| 3427 | rs8236900   | 14 | 39053041 | A | A | A | G | A | A    |
| 3428 | rs3670380   | 14 | 39725953 | G | G | G | A | G | G    |
| 3429 | rs3659136   | 14 | 39862543 | A | A | A | G | A | A    |
| 3430 | rs6354338   | 14 | 39944436 | A | A | A | G | A | A    |
| 3431 | rs4230305   | 14 | 39961265 | G | G | G | G | G | G    |
| 3432 | rs6182700   | 14 | 40069959 | T | T | T | A | T | T    |
| 3433 | rs3699072   | 14 | 40156248 | A | A | A | G | A | A    |
| 3434 | rs3689993   | 14 | 40354993 | C | C | C | G | C | C    |
| 3435 | rs3657687   | 14 | 40504185 | A | A | A | G | A | G    |
| 3436 | rs6288476   | 14 | 40683873 | C | C | C | A | C | C    |
| 3437 | rs4230315   | 14 | 40926934 | A | A | A | G | A | G    |
| 3438 | rs4230319   | 14 | 40927091 | C | C | C | C | C | C    |
| 3439 | rs4135454   | 14 | 40989594 | G | G | G | C | G | G    |
| 3440 | rs8244142   | 14 | 41336853 | G | G | G | A | G | G    |
| 3441 | rs6373839   | 14 | 41560376 | G | G | G | A | G | G    |
| 3442 | rs3659150   | 14 | 42268201 | G | G | G | G | G | G    |
| 3443 | rs6278789   | 14 | 42466967 | G | G | G | A | G | G    |
| 3444 | rs3707497   | 14 | 42512837 | G | G | G | A | G | A    |
| 3445 | rs6374916   | 14 | 42824462 | C | C | C | C | C | C    |
| 3446 | rs3708709   | 14 | 43047330 | G | G | G | A | G | G    |
| 3447 | rs3687915   | 14 | 43183604 | A | A | A | G | A | A    |
| 3448 | mCV23384307 | 14 | 41762771 | C | C | C | A | C | A    |
| 3449 | rs4197422   | 14 | 43278805 | A | A | A | G | A | G    |
| 3450 | rs8244120   | 14 | 43620960 | A | A | A | T | A | A    |
| 3451 | rs3684504   | 14 | 43621534 | A | A | A | G | A | A    |
| 3452 | rs3724857   | 14 | 43793337 | A | A | A | G | G | G    |
| 3453 | mCV24777660 | 14 | 42906842 | A | A | A | T | A | T    |
| 3454 | rs3681670   | 14 | 44771183 | G | G | G | A | G | NONE |
| 3455 | rs3680568   | 14 | 44876669 | A | A | A | G | G | G    |
| 3456 | rs3666583   | 14 | 44880408 | A | A | A | G | A | A    |
| 3457 | rs6258117   | 14 | 44911725 | G | G | G | G | G | G    |
| 3458 | rs3688559   | 14 | 45006165 | A | A | A | G | A | A    |
| 3459 | rs4230381   | 14 | 45052912 | G | G | G | G | G | G    |
| 3460 | rs3153444   | 14 | 46056409 | T | T | T | A | T | T    |
| 3461 | rs3725558   | 14 | 46220609 | A | A | A | G | A | A    |
| 3462 | rs3655501   | 14 | 46230668 | G | G | G | A | G | G    |
| 3463 | rs4230383   | 14 | 46341181 | C | C | C | A | C | C    |
| 3464 | rs4230384   | 14 | 46341187 | C | C | C | C | C | C    |
| 3465 | rs8244157   | 14 | 46590627 | G | G | G | A | G | G    |
| 3466 | rs3707560   | 14 | 46723061 | G | G | G | A | G | G    |
| 3467 | rs4222071   | 14 | 46879749 | G | G | G | G | G | G    |
| 3468 | rs3719196   | 14 | 46914470 | G | G | G | A | G | G    |
| 3469 | rs8251329   | 14 | 46937364 | G | G | G | A | G | G    |
| 3470 | rs8251323   | 14 | 46938331 | G | G | G | G | G | G    |
| 3471 | rs6216820   | 14 | 47120381 | A | A | A | A | A | A    |
| 3472 | rs6333066   | 14 | 47517607 | A | A | A | A | A | A    |
| 3473 | mCV23547823 | 14 | 46815038 | A | A | A | C | A | A    |
| 3474 | rs8244195   | 14 | 47102916 | A | A | A | A | C | A    |
| 3475 | rs6261451   | 14 | 48020869 | A | A | A | A | G | A    |

|      |             |    |          |   |   |     |   |     |   |
|------|-------------|----|----------|---|---|-----|---|-----|---|
| 3476 | rs8244244   | 14 | 48021167 | G | G | G   | G | G   | G |
| 3477 | rs8236919   | 14 | 48209352 | A | A | A   | A | G   | A |
| 3478 | rs8251247   | 14 | 48210166 | G | G | G   | G | G   | G |
| 3479 | rs8244273   | 14 | 48240598 | C | C | C   | C | A   | C |
| 3480 | rs6356503   | 14 | 48485146 | G | G | G   | G | G   | G |
| 3481 | rs3088661   | 14 | 48924826 | A | A | A   | A | G   | A |
| 3482 | rs3023410   | 14 | 48924894 | G | G | G   | G | C   | G |
| 3483 | rs3657883   | 14 | 49930376 | T | T | T   | T | T   | T |
| 3484 | rs6376037   | 14 | 50266204 | C | C | C   | C | C   | C |
| 3485 | rs3689948   | 14 | 50610267 | A | A | G   | A | G   | A |
| 3486 | rs3695346   | 14 | 50614021 | A | A | A/C | A | A/C | A |
| 3487 | rs3692863   | 14 | 50807707 | A | G | G   | A | G   | A |
| 3488 | rs6280914   | 14 | 51226826 | G | G | G   | G | G   | G |
| 3489 | rs6399403   | 14 | 51348575 | G | G | G   | G | G   | G |
| 3490 | rs4230402   | 14 | 52297000 | G | G | G   | G | G   | G |
| 3491 | rs3679870   | 14 | 52356020 | G | A | G   | G | G   | G |
| 3492 | rs6207829   | 14 | 52357364 | A | A | A   | A | A   | A |
| 3493 | rs3690953   | 14 | 52829746 | A | G | G   | A | G   | A |
| 3494 | rs3708847   | 14 | 52897359 | A | G | A   | A | A   | A |
| 3495 | rs6207322   | 14 | 53089767 | G | G | G   | G | G   | G |
| 3496 | rs3710549   | 14 | 53185693 | A | A | A   | G | A   | G |
| 3497 | rs3687710   | 14 | 53190824 | A | A | A   | C | A   | C |
| 3498 | rs3658197   | 14 | 53313810 | T | A | T   | A | T   | A |
| 3499 | rs3699179   | 14 | 53763412 | A | A | A   | G | A   | A |
| 3500 | rs6245431   | 14 | 53807862 | A | A | A   | A | A   | A |
| 3501 | mCV23132580 | 14 | 50594810 | G | G | A   | G | A   | G |
| 3502 | rs4230406   | 14 | 54741084 | A | A | A   | A | A   | A |
| 3503 | mCV23128760 | 14 | 51102719 | A | A | G   | A | G   | A |
| 3504 | rs3666026   | 14 | 54756956 | A | A | A   | T | A   | A |
| 3505 | rs3680253   | 14 | 54869217 | G | A | A   | G | G   | A |
| 3506 | rs3703075   | 14 | 54913181 | A | G | A   | G | A   | G |
| 3507 | rs6360386   | 14 | 54980518 | A | G | A   | G | A   | G |
| 3508 | rs3090105   | 14 | 55063511 | G | G | G   | G | G   | G |
| 3509 | rs6275800   | 14 | 55392769 | C | C | C   | C | C   | C |
| 3510 | rs4230410   | 14 | 55960710 | A | A | A   | A | A   | A |
| 3511 | rs3718193   | 14 | 56052977 | A | G | A   | G | A   | G |
| 3512 | rs6392794   | 14 | 56065289 | G | G | G   | G | G   | G |
| 3513 | rs3669959   | 14 | 56184698 | G | G | G   | A | G   | G |
| 3514 | rs6161506   | 14 | 56250480 | C | C | C   | A | C   | C |
| 3515 | rs3721918   | 14 | 56527076 | G | G | A   | A | G   | G |
| 3516 | rs3700859   | 14 | 56728654 | A | A | A   | G | A   | A |
| 3517 | rs6329390   | 14 | 57050768 | A | A | A   | A | A   | A |
| 3518 | rs6255757   | 14 | 57183171 | G | G | G   | G | G   | G |
| 3519 | rs4230419   | 14 | 57192697 | G | G | G   | G | G   | G |
| 3520 | rs3697645   | 14 | 57347759 | G | G | G   | A | G   | G |
| 3521 | rs3695574   | 14 | 57566391 | A | A | A   | G | A   | A |
| 3522 | rs3696925   | 14 | 57566648 | A | A | A   | G | A   | A |
| 3523 | rs4230420   | 14 | 57965520 | G | G | G   | G | G   | G |
| 3524 | rs6330733   | 14 | 58054904 | A | A | A   | A | A   | A |
| 3525 | rs8240011   | 14 | 58072553 | G | G | G   | G | G   | G |
| 3526 | rs8240001   | 14 | 58093229 | C | C | C   | C | C   | C |
| 3527 | rs8239993   | 14 | 58095389 | A | A | A   | A | A   | A |
| 3528 | rs8239991   | 14 | 58095503 | A | A | A   | A | A   | A |
| 3529 | rs3714353   | 14 | 58511050 | A | A | A   | C | A   | A |
| 3530 | rs3654985   | 14 | 58517616 | G | G | G   | A | G   | G |
| 3531 | mCV25372020 | 14 | 55550869 | G | A | A   | A | G   | A |
| 3532 | mCV24914426 | 14 | 55783371 | A | C | A   | C | A   | C |
| 3533 | rs6219411   | 14 | 58852403 | A | A | A   | A | A   | A |
| 3534 | rs3712401   | 14 | 59239371 | A | A | A   | G | A   | A |
| 3535 | rs3719672   | 14 | 59517387 | A | A | A   | C | A   | A |
| 3536 | rs4230425   | 14 | 59731070 | A | A | A   | A | A   | A |
| 3537 | rs4230426   | 14 | 59731209 | A | A | A   | A | A   | A |
| 3538 | rs3090250   | 14 | 59788661 | G | G | G   | G | G   | G |
| 3539 | rs3699699   | 14 | 59810769 | A | A | A   | G | A   | A |
| 3540 | rs6309502   | 14 | 59826461 | A | A | A   | G | A   | A |
| 3541 | rs3672425   | 14 | 60335045 | A | C | A   | A | A   | C |
| 3542 | rs6360170   | 14 | 60654122 | G | A | A   | A | G   | A |
| 3543 | rs3724660   | 14 | 60679103 | G | A | G   | A | G   | A |
| 3544 | rs3677417   | 14 | 60925200 | G | A | A   | A | A   | A |
| 3545 | rs3699418   | 14 | 61334173 | A | G | G   | G | G   | G |
| 3546 | rs6242657   | 14 | 61724741 | A | G | G   | G | G   | G |
| 3547 | rs4136556   | 14 | 62163288 | A | G | G   | G | G   | G |
| 3548 | rs8266245   | 14 | 62298382 | C | A | A   | A | A   | A |
| 3549 | rs8266250   | 14 | 62298737 | G | G | G   | G | G   | G |



|      |           |    |          |      |   |   |   |      |   |
|------|-----------|----|----------|------|---|---|---|------|---|
| 3550 | rs4230463 | 14 | 62380282 | G    | G | A | A | A    | G |
| 3551 | rs6366173 | 14 | 62399064 | G    | G | A | A | A    | A |
| 3552 | rs3695649 | 14 | 62965723 | A    | A | G | G | G    | G |
| 3553 | rs3723413 | 14 | 63041573 | G    | G | G | A | G    | G |
| 3554 | rs3697682 | 14 | 63513209 | A    | A | G | G | G    | G |
| 3555 | rs6363872 | 14 | 63546489 | C    | C | G | G | G    | G |
| 3556 | rs3657496 | 14 | 63656250 | G    | A | G | G | G    | A |
| 3557 | rs6269487 | 14 | 64747403 | C    | C | C | A | C    | C |
| 3558 | rs6377630 | 14 | 64753539 | G    | G | G | G | G    | G |
| 3559 | rs4137600 | 14 | 64829224 | NONE | A | G | A | G    | A |
| 3560 | rs4230480 | 14 | 64949495 | G    | G | G | G | G    | G |
| 3561 | rs3701623 | 14 | 64968413 | G    | A | G | A | G    | A |
| 3562 | rs6351929 | 14 | 65324360 | A    | A | G | A | G    | A |
| 3563 | rs3714110 | 14 | 65333234 | G    | A | G | A | G    | A |
| 3564 | rs3718611 | 14 | 65454643 | G    | G | A | G | A    | G |
| 3565 | rs3722734 | 14 | 66290004 | G    | A | A | A | A    | A |
| 3566 | rs6346382 | 14 | 66397452 | G    | G | G | G | G    | G |
| 3567 | rs4230487 | 14 | 66551180 | A    | A | A | A | A    | A |
| 3568 | rs4230503 | 14 | 66360734 | A    | A | A | A | A    | A |
| 3569 | rs3711616 | 14 | 66685220 | A    | C | A | C | A    | C |
| 3570 | rs2020598 | 14 | 66840449 | G    | G | A | G | A    | G |
| 3571 | rs6383423 | 14 | 67087043 | A    | A | A | A | A    | A |
| 3572 | rs6300504 | 14 | 67399005 | A    | A | A | A | A    | A |
| 3573 | rs3721365 | 14 | 68168875 | C    | A | A | A | A    | A |
| 3574 | rs3656004 | 14 | 68313309 | G    | A | A | A | A    | A |
| 3575 | rs3699310 | 14 | 68495170 | G    | A | G | G | G    | G |
| 3576 | rs6192856 | 14 | 68906572 | G    | G | G | G | G    | G |
| 3577 | rs3723391 | 14 | 69087437 | A    | G | A | A | A    | A |
| 3578 | rs3674003 | 14 | 69394228 | G    | C | G | C | G    | C |
| 3579 | rs6209200 | 14 | 69626933 | A    | T | A | A | A    | A |
| 3580 | rs3089143 | 14 | 69658051 | A    | A | A | A | A    | A |
| 3581 | rs6289135 | 14 | 69936501 | G    | G | G | G | G    | G |
| 3582 | rs3665356 | 14 | 70335842 | A    | A | A | G | A    | A |
| 3583 | rs3660202 | 14 | 70341585 | G    | G | G | A | G    | G |
| 3584 | rs6273755 | 14 | 70761487 | G    | G | G | G | NONE | G |
| 3585 | rs3706792 | 14 | 70763611 | G    | G | G | A | G    | G |
| 3586 | rs6173292 | 14 | 70896876 | G    | G | G | A | A    | G |
| 3587 | rs6352085 | 14 | 71454776 | A    | A | A | A | C    | A |
| 3588 | rs3023413 | 14 | 71540901 | A    | A | A | A | G    | A |
| 3589 | rs3023412 | 14 | 72111198 | A    | A | A | A | C    | A |
| 3590 | rs6396864 | 14 | 72817636 | G    | G | A | G | G    | G |
| 3591 | rs6399916 | 14 | 72979539 | A    | A | A | A | A    | A |
| 3592 | rs6349283 | 14 | 74301196 | G    | G | G | G | G    | G |
| 3593 | rs6317880 | 14 | 74515545 | G    | G | G | G | G    | G |
| 3594 | rs3665803 | 14 | 75192472 | A    | G | G | G | G    | G |
| 3595 | rs3676946 | 14 | 75195795 | A    | C | C | C | C    | C |
| 3596 | rs6222560 | 14 | 75681226 | T    | A | A | A | T    | A |
| 3597 | rs3674288 | 14 | 75870785 | C    | A | A | A | A    | A |
| 3598 | rs6340422 | 14 | 76298692 | A    | T | T | T | T    | T |
| 3599 | rs3709178 | 14 | 76536133 | G    | A | A | A | A    | A |
| 3600 | rs3699140 | 14 | 76696081 | A    | G | A | G | G    | G |
| 3601 | rs6410417 | 14 | 76925644 | G    | A | A | A | A    | A |
| 3602 | rs3718631 | 14 | 77163953 | A    | G | G | G | G    | G |
| 3603 | rs3680118 | 14 | 78185123 | G    | A | A | G | A    | A |
| 3604 | rs3668028 | 14 | 78279319 | G    | A | A | G | A    | A |
| 3605 | rs3668114 | 14 | 78279363 | G    | A | A | G | A    | A |
| 3606 | rs3663148 | 14 | 78682107 | T    | A | A | T | A    | A |
| 3607 | rs3708535 | 14 | 78686463 | C    | A | A | C | A    | A |
| 3608 | rs6326060 | 14 | 78777045 | G    | G | G | G | G    | G |
| 3609 | rs3686226 | 14 | 78911167 | A    | G | G | A | G    | G |
| 3610 | rs3712782 | 14 | 78977690 | A    | G | G | A | G    | G |
| 3611 | rs6171492 | 14 | 79313186 | G    | A | A | G | A    | A |
| 3612 | rs3680448 | 14 | 79368860 | T    | A | A | T | A    | A |
| 3613 | rs6256136 | 14 | 79369256 | T    | A | A | T | A    | A |
| 3614 | rs3676913 | 14 | 79942989 | C    | A | A | C | A    | A |
| 3615 | rs3679493 | 14 | 80430045 | A    | G | G | A | G    | G |
| 3616 | rs3709736 | 14 | 81396444 | A    | C | C | A | C    | C |
| 3617 | rs3676856 | 14 | 81784749 | G    | G | G | G | G    | G |
| 3618 | rs3670465 | 14 | 81902544 | A    | T | T | A | T    | T |
| 3619 | rs3667933 | 14 | 81956876 | A    | G | G | A | G    | G |
| 3620 | rs3725470 | 14 | 82281581 | T    | A | A | T | A    | A |
| 3621 | rs6245063 | 14 | 82312893 | G    | G | G | G | G    | G |
| 3622 | rs3717456 | 14 | 82650698 | A    | G | G | A | G    | G |
| 3623 | rs6395984 | 14 | 82944063 | C    | A | A | C | C    | A |

|      |           |    |           |   |   |   |   |   |   |
|------|-----------|----|-----------|---|---|---|---|---|---|
| 3624 | rs3661419 | 14 | 83327265  | A | G | G | A | A | G |
| 3625 | rs3706761 | 14 | 83865561  | A | G | G | A | A | G |
| 3626 | rs6176735 | 14 | 84102001  | A | G | G | A | A | G |
| 3627 | rs6299927 | 14 | 84309814  | G | A | A | G | G | A |
| 3628 | rs2020669 | 14 | 84407017  | G | G | G | G | G | G |
| 3629 | rs2020662 | 14 | 84407256  | A | C | C | A | A | C |
| 3630 | rs6309708 | 14 | 84466840  | G | G | G | G | G | G |
| 3631 | rs4139735 | 14 | 84482998  | G | A | A | G | G | A |
| 3632 | rs3724701 | 14 | 85334993  | A | G | G | A | A | G |
| 3633 | rs6217888 | 14 | 85608884  | G | G | G | G | G | G |
| 3634 | rs3718262 | 14 | 85692909  | A | G | G | A | A | G |
| 3635 | rs3719266 | 14 | 85950983  | A | G | G | A | G | G |
| 3636 | rs6393450 | 14 | 86058272  | G | G | G | G | G | G |
| 3637 | rs3719489 | 14 | 86690000  | A | C | C | A | C | C |
| 3638 | rs3701188 | 14 | 86910090  | A | C | C | A | C | C |
| 3639 | rs3717398 | 14 | 86946266  | A | G | G | A | G | G |
| 3640 | rs6220895 | 14 | 87134487  | G | G | G | G | G | G |
| 3641 | rs3700154 | 14 | 87748115  | G | A | A | G | A | A |
| 3642 | rs3685007 | 14 | 88257499  | G | A | A | G | A | A |
| 3643 | rs6301349 | 14 | 88316888  | A | G | G | A | G | G |
| 3644 | rs3679225 | 14 | 88401977  | G | G | G | G | G | G |
| 3645 | rs3688189 | 14 | 88736539  | A | G | G | A | G | G |
| 3646 | rs3704676 | 14 | 88736980  | G | A | A | G | A | A |
| 3647 | rs3669193 | 14 | 88885503  | C | A | A | C | A | A |
| 3648 | rs3684516 | 14 | 89120414  | T | A | A | T | A | A |
| 3649 | rs4230511 | 14 | 90313713  | G | G | G | G | G | G |
| 3650 | rs6257594 | 14 | 90562643  | A | A | A | A | G | A |
| 3651 | rs6367718 | 14 | 91059903  | C | C | C | C | C | C |
| 3652 | rs3670872 | 14 | 91831856  | A | A | A | G | A | A |
| 3653 | rs3692362 | 14 | 92002849  | C | C | C | G | C | C |
| 3654 | rs3680345 | 14 | 92006063  | A | A | A | G | A | A |
| 3655 | rs6381585 | 14 | 92009360  | C | C | C | C | C | C |
| 3656 | rs4230521 | 14 | 92097946  | G | G | G | G | G | G |
| 3657 | rs3691209 | 14 | 92167911  | C | A | A | C | A | A |
| 3658 | rs6211108 | 14 | 92402086  | C | C | C | C | C | C |
| 3659 | rs6191117 | 14 | 92434091  | A | G | G | G | G | G |
| 3660 | rs3670620 | 14 | 92501474  | G | G | G | C | G | G |
| 3661 | rs3717612 | 14 | 92507339  | G | G | G | A | G | G |
| 3662 | rs3708665 | 14 | 93083576  | A | A | A | C | A | A |
| 3663 | rs3696439 | 14 | 93448908  | A | A | A | G | A | A |
| 3664 | rs6179144 | 14 | 93467984  | G | G | G | A | G | G |
| 3665 | rs6220962 | 14 | 93921872  | A | A | A | A | A | A |
| 3666 | rs4135519 | 14 | 94104521  | A | G | G | G | G | G |
| 3667 | rs3090823 | 14 | 94334437  | A | A | A | A | A | A |
| 3668 | rs6319132 | 14 | 94738657  | A | A | A | A | A | A |
| 3669 | rs4230523 | 14 | 95358761  | A | A | A | A | A | A |
| 3670 | rs3681573 | 14 | 95364541  | A | G | G | G | G | G |
| 3671 | rs3660029 | 14 | 95631189  | G | A | A | A | A | G |
| 3672 | rs6305011 | 14 | 96039333  | G | G | G | G | G | G |
| 3673 | rs4230537 | 14 | 96064601  | A | A | A | A | A | A |
| 3674 | rs3703652 | 14 | 96408133  | A | C | C | C | C | C |
| 3675 | rs6339304 | 14 | 96608916  | G | G | G | G | G | G |
| 3676 | rs4230545 | 14 | 96725292  | A | G | G | G | G | A |
| 3677 | rs3677141 | 14 | 97072936  | G | A | A | A | A | A |
| 3678 | rs6258968 | 14 | 97115826  | A | C | C | C | C | C |
| 3679 | rs4230548 | 14 | 97358405  | A | A | A | A | A | A |
| 3680 | rs3088472 | 14 | 97653229  | A | A | A | A | A | A |
| 3681 | rs6403004 | 14 | 98207644  | G | A | A | A | A | A |
| 3682 | rs6292427 | 14 | 98574851  | G | G | G | G | G | G |
| 3683 | rs3654132 | 14 | 98578208  | A | G | G | A | G | G |
| 3684 | rs3678059 | 14 | 98713773  | C | C | C | A | C | A |
| 3685 | rs3090772 | 14 | 98715241  | G | G | G | G | G | G |
| 3686 | rs3702122 | 14 | 98720694  | A | A | A | C | A | C |
| 3687 | rs3691899 | 14 | 98792413  | C | C | C | A | A | A |
| 3688 | rs6156629 | 14 | 98810473  | A | A | A | A | A | A |
| 3689 | rs3707149 | 14 | 99118700  | A | G | G | G | G | G |
| 3690 | rs4230566 | 14 | 99335525  | A | A | A | A | A | A |
| 3691 | rs3682169 | 14 | 99535523  | A | G | G | G | A | G |
| 3692 | rs6246435 | 14 | 99855838  | G | G | G | G | G | G |
| 3693 | rs3680792 | 14 | 100284919 | A | G | G | G | A | G |
| 3694 | rs6211694 | 14 | 100975505 | C | C | C | C | C | C |
| 3695 | rs6218311 | 14 | 101169889 | G | G | G | G | G | A |
| 3696 | rs4139535 | 14 | 101872032 | G | A | A | A | G | G |
| 3697 | rs6209981 | 14 | 101951056 | T | A | A | A | T | T |

|      |           |    |           |   |   |   |   |   |   |
|------|-----------|----|-----------|---|---|---|---|---|---|
| 3698 | rs6169596 | 14 | 102767457 | T | A | A | A | T | A |
| 3699 | rs3708779 | 14 | 103068000 | G | A | A | A | G | A |
| 3700 | rs6336983 | 14 | 103924860 | A | A | A | A | A | A |
| 3701 | rs3683181 | 14 | 103985865 | A | A | A | G | G | A |
| 3702 | rs3726052 | 14 | 104244696 | A | G | G | G | G | G |
| 3703 | rs3726642 | 14 | 104244789 | C | A | A | A | A | A |
| 3704 | rs6399186 | 14 | 104466681 | G | G | G | G | G | G |
| 3705 | rs3661551 | 14 | 104477641 | G | G | A | A | A | G |
| 3706 | rs3683221 | 14 | 104867978 | G | A | A | A | A | A |
| 3707 | rs6392366 | 14 | 104885073 | G | G | G | G | G | G |
| 3708 | rs3672858 | 14 | 104887441 | C | C | A | A | A | C |
| 3709 | rs6256423 | 14 | 106108556 | G | G | G | G | G | A |
| 3710 | rs4230574 | 14 | 106631293 | A | A | A | A | A | A |
| 3711 | rs6410408 | 14 | 106733464 | A | A | A | A | A | A |
| 3712 | rs6226481 | 14 | 108194279 | A | A | A | A | A | A |
| 3713 | rs3722416 | 14 | 108333902 | G | G | G | A | G | G |
| 3714 | rs3658574 | 14 | 108647262 | G | G | G | A | G | G |
| 3715 | rs6400296 | 14 | 109164992 | C | C | C | C | C | C |
| 3716 | rs3654691 | 14 | 109194638 | A | A | A | G | A | A |
| 3717 | rs3671398 | 14 | 109365819 | A | A | A | G | A | A |
| 3718 | rs3090698 | 14 | 109444589 | A | A | A | A | A | A |
| 3719 | rs6169105 | 14 | 109578622 | G | G | G | A | G | G |
| 3720 | rs3090127 | 14 | 109998234 | G | G | G | G | G | G |
| 3721 | rs6335025 | 14 | 110216466 | G | A | A | A | A | A |
| 3722 | rs3721941 | 14 | 110342478 | T | A | A | A | A | A |
| 3723 | rs4230594 | 14 | 110434211 | G | A | A | A | A | A |
| 3724 | rs6365830 | 14 | 110830994 | A | C | C | C | C | C |
| 3725 | rs3656556 | 14 | 110921454 | A | G | G | A | G | G |
| 3726 | rs3665847 | 14 | 110951297 | A | G | G | G | G | G |
| 3727 | rs4230596 | 14 | 111308626 | A | A | A | C | A | A |
| 3728 | rs3665550 | 14 | 111354233 | C | C | C | A | C | C |
| 3729 | rs3726296 | 14 | 111667485 | T | A | A | A | A | A |
| 3730 | rs6237412 | 14 | 111854792 | C | C | C | C | C | C |
| 3731 | rs3710901 | 14 | 111950778 | A | A | A | T | A | A |
| 3732 | rs6177758 | 14 | 112148451 | G | G | G | G | G | G |
| 3733 | rs3691815 | 14 | 112694348 | G | C | C | C | G | C |
| 3734 | rs4230598 | 14 | 112766458 | A | A | A | A | A | A |
| 3735 | rs3682013 | 14 | 113014012 | G | A | A | G | G | G |
| 3736 | rs3682065 | 14 | 113014037 | A | C | C | A | A | A |
| 3737 | rs6384035 | 14 | 113472061 | G | G | G | G | A | G |
| 3738 | rs3690618 | 14 | 113588525 | A | G | G | G | G | A |
| 3739 | rs3669586 | 14 | 113604821 | A | G | G | A | A | A |
| 3740 | rs4230608 | 14 | 113621179 | G | G | G | G | G | G |
| 3741 | rs4230609 | 14 | 113621259 | A | G | G | A | A | A |
| 3742 | rs6166926 | 14 | 113663840 | A | A | A | A | A | A |
| 3743 | rs3714594 | 14 | 113720943 | C | A | A | C | C | C |
| 3744 | rs8236923 | 14 | 113799164 | G | G | G | A | A | G |
| 3745 | rs8236924 | 14 | 113804663 | G | G | G | G | G | G |
| 3746 | rs8255958 | 14 | 113811533 | A | A | A | T | T | A |
| 3747 | rs8245390 | 14 | 113824164 | G | A | A | A | A | G |
| 3748 | rs3698545 | 14 | 113996232 | A | A | A | G | G | A |
| 3749 | rs6258782 | 14 | 114337175 | A | A | A | A | A | A |
| 3750 | rs3654637 | 14 | 114723934 | A | G | G | G | G | A |
| 3751 | rs4230617 | 14 | 114738214 | G | G | G | G | G | G |
| 3752 | rs4230621 | 14 | 114916631 | G | G | G | G | G | G |
| 3753 | rs3674353 | 14 | 115566681 | G | G | A | A | A | G |
| 3754 | rs6229962 | 14 | 115619104 | G | G | G | G | G | G |
| 3755 | rs8266870 | 15 | 99100827  | G | G | G | G | G | G |
| 3756 | rs8277842 | 15 | 99254574  | G | A | A | G | G | G |
| 3757 | rs3677296 | 15 | 40077809  | G | A | G | A | A | G |
| 3758 | rs4231033 | 15 | 103783640 | G | A | A | G | A | A |
| 3759 | rs8259436 | 15 | 75141907  | A | A | A | G | G | G |
| 3760 | rs3724697 | 15 | 40072942  | G | G | A | G | G | A |
| 3761 | rs6348185 | 15 | 52046695  | A | A | C | A | C | C |
| 3762 | rs8266877 | 15 | 99101884  | A | A | A | A | A | A |
| 3763 | rs3657139 | 15 | 86749385  | G | G | A | G | G | G |
| 3764 | rs8279144 | 15 | 3145547   | A | A | A | A | A | A |
| 3765 | rs8279140 | 15 | 3410749   | C | C | C | C | C | C |
| 3766 | rs6361261 | 15 | 3580852   | A | A | A | A | A | A |
| 3767 | rs3721852 | 15 | 3821767   | A | G | G | G | A | A |
| 3768 | rs6274833 | 15 | 4403119   | G | G | G | G | G | G |
| 3769 | rs8250965 | 15 | 5065079   | G | G | G | G | G | G |
| 3770 | rs8243608 | 15 | 5064818   | A | A | A | A | A | A |
| 3771 | rs8250970 | 15 | 5064104   | G | G | G | G | G | G |

|      |             |    |          |      |   |   |   |   |   |
|------|-------------|----|----------|------|---|---|---|---|---|
| 3772 | rs4230640   | 15 | 5058432  | G    | G | G | G | G | G |
| 3773 | rs4230630   | 15 | 5001955  | A    | A | A | A | A | A |
| 3774 | rs6208915   | 15 | 5343910  | A    | A | A | A | A | A |
| 3775 | rs3715491   | 15 | 5995303  | A    | A | G | A | A | G |
| 3776 | rs4230646   | 15 | 6263422  | A    | A | A | A | A | A |
| 3777 | rs4230647   | 15 | 6263531  | A    | A | A | A | A | A |
| 3778 | rs3707453   | 15 | 5737304  | G    | G | A | G | G | A |
| 3779 | rs3665826   | 15 | 5744460  | G    | G | A | G | G | A |
| 3780 | rs3695953   | 15 | 5804747  | G    | G | A | G | G | A |
| 3781 | rs6188822   | 15 | 7009617  | G    | G | G | G | G | G |
| 3782 | mCV25349597 | 15 | 10220320 | T    | A | T | T | T | A |
| 3783 | rs3693019   | 15 | 7948918  | A    | A | C | A | A | C |
| 3784 | rs3705269   | 15 | 7952392  | G    | G | C | G | G | C |
| 3785 | rs3088663   | 15 | 8348140  | G    | G | G | G | G | G |
| 3786 | rs6300414   | 15 | 8237742  | G    | G | G | G | G | G |
| 3787 | rs3656384   | 15 | 8972167  | A    | G | G | G | G | G |
| 3788 | rs6392458   | 15 | 9016966  | T    | T | T | T | T | T |
| 3789 | mCV23280545 | 15 | 12452418 | C    | C | A | A | A | C |
| 3790 | rs4139431   | 15 | 9409835  | G    | A | G | A | A | A |
| 3791 | rs3667918   | 15 | 9409417  | T    | A | T | A | A | A |
| 3792 | mCV24642661 | 15 | 13240133 | A    | G | A | G | A | G |
| 3793 | rs6190892   | 15 | 10378181 | A    | T | A | A | A | T |
| 3794 | rs3685370   | 15 | 10594037 | G    | A | A | A | A | A |
| 3795 | rs6176452   | 15 | 10599813 | G    | G | G | G | G | G |
| 3796 | rs3023415   | 15 | 10723878 | A    | A | G | G | G | A |
| 3797 | rs3658137   | 15 | 11255961 | G    | A | A | A | A | A |
| 3798 | rs6242228   | 15 | 12210991 | A    | G | G | G | G | G |
| 3799 | rs3088491   | 15 | 12340413 | A    | G | G | G | G | G |
| 3800 | rs3693764   | 15 | 12632698 | A    | G | G | G | G | G |
| 3801 | rs3681808   | 15 | 12947577 | G    | G | A | G | A | G |
| 3802 | rs4139555   | 15 | 12998398 | G    | G | A | G | A | G |
| 3803 | rs3656725   | 15 | 13227756 | A    | G | A | G | A | G |
| 3804 | rs3089730   | 15 | 13167109 | A    | A | A | A | A | A |
| 3805 | rs3711814   | 15 | 13122871 | G    | G | G | A | G | G |
| 3806 | rs6295031   | 15 | 13542177 | G    | G | G | G | G | G |
| 3807 | rs6410206   | 15 | 14889410 | A    | A | A | A | A | A |
| 3808 | mCV23663070 | 15 | 17469901 | A    | C | A | A | A | C |
| 3809 | rs6233580   | 15 | 15531975 | A    | A | A | A | A | A |
| 3810 | rs3676170   | 15 | 16292855 | G    | G | A | A | A | G |
| 3811 | rs6224924   | 15 | 15880169 | G    | G | G | G | G | G |
| 3812 | mCV23652351 | 15 | 18595358 | NONE | A | C | C | C | A |
| 3813 | rs3665103   | 15 | 16726262 | A    | G | G | G | G | G |
| 3814 | rs6219745   | 15 | 16920338 | A    | G | G | G | G | G |
| 3815 | mCV23111231 | 15 | 19426941 | A    | G | A | A | G | G |
| 3816 | rs6197703   | 15 | 17718805 | A    | A | A | A | A | A |
| 3817 | rs4230664   | 15 | 18170092 | A    | G | A | G | G | G |
| 3818 | rs6168792   | 15 | 18374611 | A    | A | A | A | A | A |
| 3819 | rs3666368   | 15 | 18995366 | G    | C | C | C | C | C |
| 3820 | rs3680788   | 15 | 19114629 | A    | G | G | A | G | G |
| 3821 | rs3696823   | 15 | 19114916 | A    | A | A | G | A | A |
| 3822 | rs6409256   | 15 | 19167014 | A    | A | A | A | A | A |
| 3823 | rs3715857   | 15 | 19261351 | G    | A | A | G | A | A |
| 3824 | rs6215971   | 15 | 19854572 | A    | G | G | G | G | G |
| 3825 | rs6401788   | 15 | 20212813 | G    | C | C | C | C | C |
| 3826 | rs6267719   | 15 | 20154535 | G    | A | A | A | A | A |
| 3827 | rs3716253   | 15 | 20715725 | A    | G | G | G | G | G |
| 3828 | rs3677591   | 15 | 21180420 | G    | G | G | A | A | G |
| 3829 | rs6287380   | 15 | 21182442 | C    | C | C | C | C | C |
| 3830 | rs6208260   | 15 | 21368517 | G    | G | G | G | G | G |
| 3831 | rs3714169   | 15 | 21816884 | G    | G | A | A | G | G |
| 3832 | mCV23223429 | 15 | 24753097 | G    | G | G | A | G | G |
| 3833 | rs6260449   | 15 | 22251657 | G    | G | G | A | G | G |
| 3834 | rs3698831   | 15 | 22304391 | C    | G | C | G | C | G |
| 3835 | rs3671702   | 15 | 22498263 | A    | A | A | G | A | A |
| 3836 | rs6201636   | 15 | 22761863 | G    | G | G | G | G | G |
| 3837 | rs3697155   | 15 | 22792967 | A    | A | A | G | A | A |
| 3838 | rs6335389   | 15 | 23063828 | A    | A | A | A | A | A |
| 3839 | rs3674369   | 15 | 23245308 | A    | A | A | G | A | A |
| 3840 | rs3699876   | 15 | 23541427 | C    | C | A | C | C | C |
| 3841 | rs3719496   | 15 | 23653057 | G    | G | G | A | G | G |
| 3842 | mCV23271877 | 15 | 26486567 | C    | C | A | A | C | C |
| 3843 | rs6274937   | 15 | 23962499 | A    | C | C | A | A | C |
| 3844 | rs3661695   | 15 | 24798305 | A    | A | A | G | A | A |
| 3845 | rs6375813   | 15 | 25083118 | G    | G | G | G | G | G |

|      |             |    |          |   |   |      |   |   |   |
|------|-------------|----|----------|---|---|------|---|---|---|
| 3846 | rs3654123   | 15 | 25474535 | G | G | G    | A | G | G |
| 3847 | rs6261669   | 15 | 25828932 | A | A | A    | A | A | A |
| 3848 | rs3662618   | 15 | 26094714 | A | A | G    | G | A | A |
| 3849 | rs6329292   | 15 | 26671912 | C | C | C    | C | C | C |
| 3850 | mCV23357315 | 15 | 30070515 | G | C | G    | G | G | C |
| 3851 | rs3670581   | 15 | 27108006 | G | G | A    | A | A | G |
| 3852 | rs3090071   | 15 | 27765234 | A | A | A    | A | A | A |
| 3853 | rs3711707   | 15 | 27843753 | A | G | G    | G | G | G |
| 3854 | rs6378494   | 15 | 28201562 | G | G | G    | G | G | G |
| 3855 | rs3702361   | 15 | 29090562 | C | C | A    | C | A | C |
| 3856 | rs6192378   | 15 | 29469122 | A | A | A    | A | A | A |
| 3857 | rs3088525   | 15 | 29671212 | G | A | G    | G | G | A |
| 3858 | rs6210607   | 15 | 30253148 | C | A | A    | A | A | A |
| 3859 | rs3683908   | 15 | 30394353 | A | G | G    | G | G | G |
| 3860 | rs6252277   | 15 | 30861774 | A | T | T    | T | T | T |
| 3861 | mCV23401463 | 15 | 34110939 | A | A | G    | G | G | A |
| 3862 | rs4230683   | 15 | 31006896 | G | A | A    | A | A | A |
| 3863 | rs3710212   | 15 | 31649437 | A | G | G    | G | G | G |
| 3864 | rs3679521   | 15 | 31740063 | A | G | A    | G | G | G |
| 3865 | rs3023416   | 15 | 31970597 | G | G | G    | A | A | A |
| 3866 | rs3693538   | 15 | 32067128 | A | A | A    | A | A | A |
| 3867 | rs6333696   | 15 | 32171906 | G | A | G    | A | G | A |
| 3868 | rs3708954   | 15 | 32205034 | A | G | A    | G | A | G |
| 3869 | rs3666257   | 15 | 32363127 | A | G | A    | G | A | G |
| 3870 | rs3666408   | 15 | 32363215 | G | G | A    | G | A | G |
| 3871 | rs3668136   | 15 | 32363470 | G | G | A    | G | A | G |
| 3872 | rs3661763   | 15 | 32368998 | C | G | G    | G | G | G |
| 3873 | rs3091174   | 15 | 32751064 | A | G | A    | G | A | G |
| 3874 | rs6325305   | 15 | 32616470 | G | A | A    | A | A | A |
| 3875 | rs8250895   | 15 | 33084415 | G | A | A    | A | A | A |
| 3876 | rs8236956   | 15 | 33084790 | A | C | C    | C | C | C |
| 3877 | rs8236958   | 15 | 33085113 | G | G | G    | G | G | G |
| 3878 | rs8238521   | 15 | 33085788 | A | A | A    | A | A | A |
| 3879 | rs8238522   | 15 | 33085834 | A | A | A    | A | A | A |
| 3880 | rs8267875   | 15 | 33134426 | G | G | G    | G | G | G |
| 3881 | rs8267890   | 15 | 33264485 | G | A | A    | A | A | A |
| 3882 | rs8267913   | 15 | 33301970 | A | T | T    | T | T | T |
| 3883 | rs8267917   | 15 | 33302195 | G | A | G    | A | G | A |
| 3884 | rs8267941   | 15 | 33518759 | G | G | A    | A | A | G |
| 3885 | rs8267966   | 15 | 33549693 | A | A | C    | A | C | A |
| 3886 | rs3687471   | 15 | 33568862 | C | G | NONE | G | C | G |
| 3887 | rs6174755   | 15 | 33752351 | A | T | T    | T | T | T |
| 3888 | rs3704590   | 15 | 34026227 | G | A | G    | G | G | A |
| 3889 | rs8256260   | 15 | 34494889 | A | G | G    | G | G | G |
| 3890 | rs8250995   | 15 | 34495343 | G | A | A    | A | A | A |
| 3891 | mCV24802203 | 15 | 37430163 | G | A | A    | G | G | G |
| 3892 | rs6279676   | 15 | 34658250 | G | A | A    | A | A | A |
| 3893 | rs6214748   | 15 | 34875552 | A | G | G    | G | G | G |
| 3894 | rs3685951   | 15 | 35470919 | G | A | A    | A | A | A |
| 3895 | rs3089995   | 15 | 35670884 | A | G | G    | G | G | G |
| 3896 | rs6329380   | 15 | 35934138 | A | G | G    | G | G | G |
| 3897 | rs3705382   | 15 | 36996718 | A | G | G    | G | G | G |
| 3898 | rs6390021   | 15 | 36889042 | A | G | G    | G | G | G |
| 3899 | rs3090153   | 15 | 36956006 | G | G | G    | G | G | G |
| 3900 | rs4230705   | 15 | 36532608 | A | A | A    | A | A | A |
| 3901 | rs3705655   | 15 | 36340694 | A | G | A    | G | G | G |
| 3902 | rs3677366   | 15 | 37098131 | C | A | A    | A | A | A |
| 3903 | rs3090049   | 15 | 37117129 | A | G | G    | G | G | G |
| 3904 | rs3725816   | 15 | 38324623 | G | G | A    | A | A | G |
| 3905 | rs4230708   | 15 | 38372496 | G | G | G    | G | G | G |
| 3906 | rs3695416   | 15 | 38562542 | C | A | C    | A | A | A |
| 3907 | rs6331384   | 15 | 38576933 | C | C | C    | C | C | C |
| 3908 | rs6218280   | 15 | 39020401 | A | A | A    | A | A | A |
| 3909 | rs3660608   | 15 | 38958568 | G | G | G    | A | G | G |
| 3910 | rs3702837   | 15 | 39271679 | A | G | G    | G | G | G |
| 3911 | rs6226483   | 15 | 39511852 | A | G | G    | G | G | G |
| 3912 | rs3681810   | 15 | 39632711 | G | A | A    | A | A | A |
| 3913 | rs3692898   | 15 | 39894704 | A | G | A    | G | G | G |
| 3914 | rs6153804   | 15 | 40367963 | G | A | A    | A | A | A |
| 3915 | rs3680004   | 15 | 40735261 | G | A | G    | A | A | A |
| 3916 | rs3683326   | 15 | 41359817 | C | C | A    | C | C | C |
| 3917 | rs6316418   | 15 | 41575634 | A | T | T    | T | T | T |
| 3918 | rs3664170   | 15 | 41610813 | G | A | A    | A | A | A |
| 3919 | mCV23322919 | 15 | 44908031 | A | A | A    | T | A | A |

|      |             |    |          |      |   |   |   |   |   |
|------|-------------|----|----------|------|---|---|---|---|---|
| 3920 | rs6313386   | 15 | 42481075 | C    | C | C | C | C | C |
| 3921 | rs3692586   | 15 | 42601022 | A    | C | C | A | C | C |
| 3922 | rs3716768   | 15 | 42604198 | A    | A | A | G | A | A |
| 3923 | rs3663316   | 15 | 42605189 | A    | G | G | G | G | G |
| 3924 | mCV23156669 | 15 | 45535477 | A    | G | G | A | G | G |
| 3925 | mCV23318468 | 15 | 45790702 | A    | T | A | A | A | A |
| 3926 | rs6303759   | 15 | 43433621 | A    | T | T | T | T | T |
| 3927 | rs4230712   | 15 | 43544902 | G    | G | G | G | G | G |
| 3928 | rs3682299   | 15 | 43553373 | G    | G | G | A | G | G |
| 3929 | rs3715565   | 15 | 44003431 | A    | G | G | G | A | G |
| 3930 | rs6188668   | 15 | 44059325 | C    | C | C | C | C | C |
| 3931 | rs3709561   | 15 | 44244702 | A    | A | G | A | A | G |
| 3932 | rs3674266   | 15 | 44244940 | G    | G | G | A | G | G |
| 3933 | rs3719612   | 15 | 44371925 | A    | G | G | G | A | G |
| 3934 | rs4230715   | 15 | 44397974 | C    | A | A | C | C | A |
| 3935 | rs6333177   | 15 | 44574079 | A    | A | A | A | A | A |
| 3936 | rs3719015   | 15 | 45104772 | A    | G | G | G | A | A |
| 3937 | rs6310537   | 15 | 45406964 | A    | A | A | A | A | A |
| 3938 | rs6329543   | 15 | 46139022 | G    | G | G | G | G | G |
| 3939 | mCV23302805 | 15 | 49367385 | A    | G | G | A | G | A |
| 3940 | rs4138760   | 15 | 46373890 | A    | G | G | G | G | G |
| 3941 | rs3660936   | 15 | 46899770 | C    | C | A | A | A | A |
| 3942 | rs4140120   | 15 | 46900061 | A    | A | C | C | C | C |
| 3943 | rs6258601   | 15 | 46956142 | C    | C | A | A | A | A |
| 3944 | rs6278499   | 15 | 47551528 | A    | A | A | A | A | A |
| 3945 | rs3659512   | 15 | 47929992 | A    | G | G | G | G | G |
| 3946 | rs6185746   | 15 | 48343654 | G    | G | G | G | G | G |
| 3947 | rs3666959   | 15 | 48823173 | A    | A | G | A | G | A |
| 3948 | rs6171444   | 15 | 48983802 | C    | C | C | C | C | C |
| 3949 | rs6362864   | 15 | 49425302 | A    | C | C | A | C | A |
| 3950 | rs3697897   | 15 | 49923310 | NONE | G | G | C | G | C |
| 3951 | rs3723378   | 15 | 50038393 | A    | A | A | T | A | T |
| 3952 | rs6180405   | 15 | 50073041 | A    | A | A | C | A | C |
| 3953 | rs6310678   | 15 | 50243482 | G    | C | C | G | C | G |
| 3954 | rs6258673   | 15 | 50312644 | A    | G | G | A | G | A |
| 3955 | rs3706523   | 15 | 50547331 | T    | T | A | T | A | T |
| 3956 | rs3697419   | 15 | 51291649 | G    | G | G | A | G | A |
| 3957 | rs3665737   | 15 | 51348632 | G    | G | G | A | G | A |
| 3958 | rs3692040   | 15 | 51096014 | C    | C | A | C | A | C |
| 3959 | rs6187435   | 15 | 51670493 | G    | G | A | A | A | A |
| 3960 | rs3684635   | 15 | 51623465 | G    | G | G | A | G | A |
| 3961 | rs3658705   | 15 | 51403508 | G    | G | G | A | G | A |
| 3962 | rs6165881   | 15 | 51861047 | A    | A | G | A | G | G |
| 3963 | rs3090780   | 15 | 51878777 | A    | A | A | A | A | A |
| 3964 | rs3707900   | 15 | 52526197 | A    | A | G | A | G | G |
| 3965 | rs3667530   | 15 | 52656774 | A    | G | A | G | A | A |
| 3966 | rs6323414   | 15 | 52760158 | G    | G | G | G | G | G |
| 3967 | rs6162431   | 15 | 53341903 | A    | A | A | A | A | A |
| 3968 | rs3684672   | 15 | 54473969 | G    | G | A | A | G | G |
| 3969 | rs6366775   | 15 | 54701001 | G    | G | A | A | G | G |
| 3970 | rs3701428   | 15 | 55348476 | G    | G | A | A | G | G |
| 3971 | rs3701952   | 15 | 55348534 | G    | G | A | A | G | G |
| 3972 | rs3656215   | 15 | 55361701 | G    | G | A | A | G | G |
| 3973 | rs3090618   | 15 | 55430319 | A    | A | A | A | A | A |
| 3974 | rs6411953   | 15 | 55025287 | G    | G | A | A | G | G |
| 3975 | rs4222076   | 15 | 56418222 | G    | G | A | A | G | G |
| 3976 | rs4230727   | 15 | 55702669 | G    | G | G | G | G | G |
| 3977 | rs6154962   | 15 | 55621216 | G    | G | G | G | G | G |
| 3978 | rs6378118   | 15 | 57282732 | C    | C | C | C | C | C |
| 3979 | rs3702158   | 15 | 57352118 | G    | G | G | A | G | G |
| 3980 | rs6254309   | 15 | 58133510 | C    | C | C | C | C | C |
| 3981 | rs4230748   | 15 | 58354899 | G    | G | G | G | G | G |
| 3982 | rs3090252   | 15 | 58354953 | C    | C | C | C | C | C |
| 3983 | mCV24494343 | 15 | 61347770 | A    | G | A | G | G | G |
| 3984 | rs3695795   | 15 | 59005789 | A    | G | G | G | G | A |
| 3985 | rs3653368   | 15 | 58971277 | A    | A | G | A | A | A |
| 3986 | rs3697599   | 15 | 59372361 | G    | A | A | A | A | A |
| 3987 | rs4136487   | 15 | 59168111 | G    | A | G | A | A | A |
| 3988 | rs6354684   | 15 | 59578431 | G    | A | A | A | A | A |
| 3989 | rs6256501   | 15 | 60089318 | A    | G | A | G | G | A |
| 3990 | rs3701449   | 15 | 60283849 | A    | T | T | T | T | T |
| 3991 | rs3662901   | 15 | 60206134 | A    | A | G | A | A | G |
| 3992 | rs3654559   | 15 | 60169779 | A    | C | C | C | C | C |
| 3993 | rs6208973   | 15 | 61058598 | C    | G | G | G | G | G |

|      |             |    |          |   |   |      |   |      |   |
|------|-------------|----|----------|---|---|------|---|------|---|
| 3994 | rs3683495   | 15 | 61406689 | A | C | A    | C | C    | C |
| 3995 | rs3667658   | 15 | 61409229 | G | A | G    | A | A    | A |
| 3996 | rs3668786   | 15 | 61418811 | C | G | C    | G | G    | G |
| 3997 | rs3671795   | 15 | 61419330 | A | G | A    | G | G    | G |
| 3998 | rs3090861   | 15 | 61445838 | G | G | G    | G | G    | G |
| 3999 | rs3663595   | 15 | 61690932 | A | A | G    | A | A    | A |
| 4000 | rs3668511   | 15 | 61758900 | G | A | G    | A | A    | A |
| 4001 | rs3653568   | 15 | 61760204 | A | G | A    | G | G    | G |
| 4002 | rs6215672   | 15 | 61779600 | G | A | G    | A | A    | A |
| 4003 | rs3678001   | 15 | 61849908 | A | A | C    | A | NONE | A |
| 4004 | mCV22701834 | 15 | 64851000 | A | G | A    | A | A    | A |
| 4005 | rs3658133   | 15 | 62073528 | G | G | A    | G | G    | G |
| 4006 | rs4230764   | 15 | 62205151 | A | A | A    | A | A    | A |
| 4007 | rs3654015   | 15 | 62479286 | A | A | C    | A | A    | A |
| 4008 | rs6276604   | 15 | 62825138 | G | G | G    | G | G    | G |
| 4009 | rs3692872   | 15 | 62864089 | C | C | A    | C | C    | C |
| 4010 | rs4139476   | 15 | 63113390 | G | G | A    | G | A    | G |
| 4011 | rs6295536   | 15 | 63152461 | G | G | G    | G | G    | G |
| 4012 | rs3677062   | 15 | 63677792 | G | A | A    | G | A    | G |
| 4013 | rs6366098   | 15 | 63699268 | C | A | A    | C | A    | C |
| 4014 | rs3023419   | 15 | 63734238 | T | T | A    | T | T    | T |
| 4015 | rs3699204   | 15 | 63737321 | A | A | G    | A | A    | A |
| 4016 | mCV22937403 | 15 | 67462822 | G | C | G    | G | G    | G |
| 4017 | rs6254661   | 15 | 64684884 | A | G | G    | A | A    | A |
| 4018 | rs3662196   | 15 | 65137545 | C | G | G    | C | C    | C |
| 4019 | rs3089203   | 15 | 65263601 | G | G | G    | G | G    | G |
| 4020 | rs6306824   | 15 | 65379051 | A | G | G    | A | A    | A |
| 4021 | rs3670563   | 15 | 65581635 | G | G | A    | G | G    | G |
| 4022 | rs6381737   | 15 | 65856370 | A | G | G    | A | A    | A |
| 4023 | rs3706861   | 15 | 66129820 | C | C | G    | C | C    | C |
| 4024 | rs3685274   | 15 | 66669421 | A | A | G    | A | A    | A |
| 4025 | rs6345802   | 15 | 67173023 | A | A | A    | A | A    | A |
| 4026 | rs4230788   | 15 | 67200394 | A | A | A    | A | A    | A |
| 4027 | rs4230789   | 15 | 67200496 | G | G | G    | G | G    | G |
| 4028 | rs6197332   | 15 | 67276153 | G | A | A    | G | G    | G |
| 4029 | mCV24506549 | 15 | 70345738 | G | G | G    | G | A    | G |
| 4030 | rs4230790   | 15 | 67382019 | A | A | A    | A | A    | A |
| 4031 | rs3726336   | 15 | 67392514 | A | A | G    | A | A    | A |
| 4032 | rs3684996   | 15 | 68017710 | G | G | A    | G | G    | G |
| 4033 | rs6213684   | 15 | 68114125 | G | G | A    | A | A    | G |
| 4034 | rs3708614   | 15 | 69462082 | C | C | G    | C | A    | A |
| 4035 | rs4230796   | 15 | 68487457 | A | A | A    | A | A    | A |
| 4036 | rs6379157   | 15 | 68620907 | C | C | G    | C | G    | C |
| 4037 | rs6363050   | 15 | 68704423 | A | A | T    | A | T    | A |
| 4038 | rs4138576   | 15 | 68719828 | G | G | G    | G | G    | G |
| 4039 | rs3670082   | 15 | 69347902 | A | A | C    | A | A    | A |
| 4040 | mCV22728423 | 15 | 72312700 | C | A | A    | C | C    | A |
| 4041 | rs6378719   | 15 | 69205581 | G | G | G    | G | G    | G |
| 4042 | rs3089472   | 15 | 69907603 | T | T | T    | T | T    | T |
| 4043 | rs6169611   | 15 | 70484965 | G | A | A    | G | A    | A |
| 4044 | rs4230804   | 15 | 70496245 | A | C | C    | A | A    | C |
| 4045 | rs6283580   | 15 | 71076029 | A | A | A    | A | A    | A |
| 4046 | rs3721322   | 15 | 71261015 | A | C | C    | C | A    | A |
| 4047 | rs3696311   | 15 | 71421315 | A | A | A    | G | A    | A |
| 4048 | rs3696862   | 15 | 71421396 | A | G | G    | A | A    | G |
| 4049 | rs3088560   | 15 | 71422176 | A | A | A    | C | A    | A |
| 4050 | rs3699312   | 15 | 71605742 | A | A | A    | G | A    | A |
| 4051 | rs3675203   | 15 | 71610697 | A | A | A    | C | A    | A |
| 4052 | rs3090121   | 15 | 71846147 | G | G | G    | G | G    | G |
| 4053 | rs6329940   | 15 | 71797146 | T | T | T    | A | A    | A |
| 4054 | rs3088506   | 15 | 71793941 | C | C | C    | A | A    | A |
| 4055 | rs6204870   | 15 | 71790221 | G | G | G    | A | A    | A |
| 4056 | rs6336747   | 15 | 72189398 | G | G | G    | G | G    | G |
| 4057 | rs3655952   | 15 | 72931171 | C | A | A    | C | C    | C |
| 4058 | rs6320424   | 15 | 73211612 | G | G | G    | G | G    | G |
| 4059 | rs4230806   | 15 | 73378194 | A | A | A    | A | A    | A |
| 4060 | mCV22750087 | 15 | 77249727 | A | C | NONE | A | A    | C |
| 4061 | rs6283506   | 15 | 74282562 | G | A | A    | A | A    | A |
| 4062 | rs6406086   | 15 | 74668646 | C | G | G    | G | G    | G |
| 4063 | rs4230809   | 15 | 74880718 | G | A | A    | A | A    | A |
| 4064 | rs3722684   | 15 | 75029080 | G | A | A    | A | A    | A |
| 4065 | rs4230815   | 15 | 75039086 | A | A | A    | A | A    | A |
| 4066 | rs4230816   | 15 | 75463148 | A | G | G    | A | A    | A |
| 4067 | rs3662946   | 15 | 75264403 | A | T | T    | A | A    | A |

|      |           |    |          |   |   |   |   |   |   |
|------|-----------|----|----------|---|---|---|---|---|---|
| 4068 | rs6354330 | 15 | 76414792 | A | A | A | A | A | A |
| 4069 | rs6213671 | 15 | 76138613 | C | C | C | C | C | C |
| 4070 | rs3685365 | 15 | 77055395 | C | G | G | C | C | G |
| 4071 | rs4138877 | 15 | 77383459 | A | C | C | A | A | C |
| 4072 | rs3676322 | 15 | 77401658 | A | G | G | A | A | G |
| 4073 | rs6236706 | 15 | 77534565 | A | G | G | A | A | G |
| 4074 | rs3660192 | 15 | 78151819 | A | G | G | G | G | G |
| 4075 | rs6342608 | 15 | 78487016 | G | G | G | A | G | G |
| 4076 | rs3682805 | 15 | 78517557 | G | G | G | A | A | G |
| 4077 | rs4140028 | 15 | 78518009 | G | G | G | A | A | G |
| 4078 | rs3704608 | 15 | 78552232 | A | A | A | G | G | A |
| 4079 | rs3701224 | 15 | 78678294 | G | G | G | A | A | G |
| 4080 | rs4230846 | 15 | 79101619 | C | C | C | C | C | C |
| 4081 | rs3667755 | 15 | 79237475 | A | C | C | A | C | C |
| 4082 | rs3690902 | 15 | 79499628 | A | A | A | G | A | A |
| 4083 | rs3698398 | 15 | 79717803 | G | G | G | A | G | G |
| 4084 | rs3665030 | 15 | 79719777 | A | G | G | A | G | G |
| 4085 | rs4230869 | 15 | 80000297 | G | G | G | C | G | G |
| 4086 | rs6363099 | 15 | 80090603 | A | A | A | A | A | A |
| 4087 | rs4230878 | 15 | 80243528 | G | G | G | A | G | G |
| 4088 | rs3713989 | 15 | 80376203 | A | A | A | G | G | A |
| 4089 | rs6410698 | 15 | 80519122 | G | G | G | G | G | G |
| 4090 | rs3721372 | 15 | 80736406 | A | A | A | G | A | A |
| 4091 | rs3686745 | 15 | 80754083 | A | A | A | C | A | A |
| 4092 | rs6358242 | 15 | 81222239 | A | A | A | A | A | A |
| 4093 | rs6276391 | 15 | 82164497 | A | C | C | A | C | C |
| 4094 | rs3674050 | 15 | 82201743 | A | G | G | A | G | A |
| 4095 | rs4230895 | 15 | 82334055 | G | G | G | G | G | G |
| 4096 | rs8279290 | 15 | 82749090 | G | G | G | G | G | G |
| 4097 | rs6211178 | 15 | 83169334 | A | A | A | A | A | A |
| 4098 | rs4230909 | 15 | 83483973 | C | A | A | A | C | A |
| 4099 | rs4230908 | 15 | 83484095 | G | G | G | A | G | G |
| 4100 | rs6204958 | 15 | 83802520 | C | C | C | C | C | C |
| 4101 | rs3672224 | 15 | 84016227 | C | A | A | A | C | A |
| 4102 | rs6343605 | 15 | 84346068 | A | A | A | A | A | A |
| 4103 | rs8274136 | 15 | 84442668 | G | A | G | G | G | G |
| 4104 | rs8274177 | 15 | 84448213 | A | A | A | A | A | A |
| 4105 | rs3725793 | 15 | 84730704 | A | G | G | G | G | G |
| 4106 | rs3660367 | 15 | 85057715 | A | G | G | A | A | A |
| 4107 | rs6357520 | 15 | 85493381 | A | A | A | A | G | G |
| 4108 | rs6404768 | 15 | 85931986 | G | G | G | G | G | G |
| 4109 | rs3683112 | 15 | 86054658 | G | G | G | A | G | G |
| 4110 | rs8238200 | 15 | 86090930 | A | A | A | G | A | A |
| 4111 | rs3681229 | 15 | 86126535 | A | G | G | A | G | G |
| 4112 | rs4230930 | 15 | 86216095 | A | G | G | A | A | G |
| 4113 | rs4230927 | 15 | 86216238 | T | A | A | T | T | A |
| 4114 | rs3708719 | 15 | 86503322 | G | G | G | A | A | G |
| 4115 | rs3697744 | 15 | 87041436 | A | T | T | T | A | T |
| 4116 | rs6354372 | 15 | 87396669 | G | G | G | G | G | G |
| 4117 | rs3682761 | 15 | 87767512 | A | C | C | C | A | A |
| 4118 | rs3727135 | 15 | 63200433 | A | A | C | A | C | A |
| 4119 | rs6367143 | 15 | 87893976 | A | A | A | A | A | A |
| 4120 | rs3677860 | 15 | 88103720 | A | G | G | G | G | G |
| 4121 | rs3710055 | 15 | 88344401 | A | A | A | G | A | A |
| 4122 | rs3694472 | 15 | 88344070 | A | A | A | G | G | G |
| 4123 | rs3724150 | 15 | 88603278 | T | T | T | A | T | T |
| 4124 | rs3707587 | 15 | 88484731 | C | C | C | A | C | C |
| 4125 | rs3091222 | 15 | 88440542 | A | A | A | A | A | A |
| 4126 | rs6322712 | 15 | 88789727 | G | G | G | G | G | G |
| 4127 | rs4230937 | 15 | 89214577 | A | A | A | A | A | A |
| 4128 | rs6231305 | 15 | 89760644 | G | G | G | G | G | G |
| 4129 | rs3720931 | 15 | 89891316 | G | A | A | A | A | G |
| 4130 | rs3726626 | 15 | 90546529 | A | A | A | A | A | A |
| 4131 | rs6353711 | 15 | 90568896 | A | A | A | A | A | A |
| 4132 | rs4230974 | 15 | 90625600 | G | G | G | G | G | G |
| 4133 | rs6374425 | 15 | 91025874 | A | A | A | A | A | A |
| 4134 | rs3683067 | 15 | 91283809 | G | G | G | G | G | G |
| 4135 | rs3717268 | 15 | 91324762 | G | G | G | A | G | G |
| 4136 | rs6251635 | 15 | 92074429 | G | G | G | G | G | G |
| 4137 | rs6173118 | 15 | 92329769 | A | A | A | A | A | A |
| 4138 | rs3722990 | 15 | 92521445 | A | A | A | G | A | A |
| 4139 | rs3716673 | 15 | 92579012 | A | T | A | T | T | T |
| 4140 | rs3091079 | 15 | 92758941 | A | A | A | A | A | A |
| 4141 | rs3658059 | 15 | 92970989 | A | G | G | A | G | G |



|      |             |    |           |   |      |   |   |   |   |
|------|-------------|----|-----------|---|------|---|---|---|---|
| 4142 | rs3666934   | 15 | 93047270  | A | A    | A | G | A | A |
| 4143 | rs6246447   | 15 | 93048001  | T | T    | T | T | T | T |
| 4144 | rs3090254   | 15 | 93329367  | G | G    | G | G | G | G |
| 4145 | rs4230978   | 15 | 93924371  | G | G    | G | G | G | G |
| 4146 | rs3667785   | 15 | 93965130  | G | A    | A | G | A | A |
| 4147 | rs6163425   | 15 | 93998253  | G | G    | G | G | G | G |
| 4148 | rs4137261   | 15 | 94347872  | G | G    | G | A | G | G |
| 4149 | rs3685284   | 15 | 94612633  | A | A    | A | C | A | A |
| 4150 | rs3657431   | 15 | 94618365  | A | A    | A | G | A | A |
| 4151 | rs3667754   | 15 | 94638884  | A | A    | A | C | A | A |
| 4152 | rs6397043   | 15 | 94679858  | G | G    | G | G | G | G |
| 4153 | mCV23203552 | 15 | 97455253  | G | A    | A | G | G | G |
| 4154 | rs3719217   | 15 | 95679367  | A | A    | G | A | A | A |
| 4155 | rs3664692   | 15 | 95899565  | A | A    | A | G | A | A |
| 4156 | rs6336182   | 15 | 96345770  | A | A    | A | A | A | G |
| 4157 | rs3714765   | 15 | 96205484  | G | G    | G | A | G | G |
| 4158 | rs3712266   | 15 | 96205116  | A | A    | A | G | A | A |
| 4159 | rs6243011   | 15 | 96144834  | A | A    | A | A | A | A |
| 4160 | rs2020742   | 15 | 96489204  | A | A    | A | A | A | A |
| 4161 | rs3688273   | 15 | 96630244  | G | G    | A | A | G | A |
| 4162 | rs3660510   | 15 | 14500981  | T | A    | T | A | T | A |
| 4163 | rs3659240   | 15 | 14462019  | G | A    | G | A | G | A |
| 4164 | rs3089955   | 15 | 97198655  | A | A    | A | A | A | A |
| 4165 | rs3722513   | 15 | 97220735  | A | A    | A | G | A | G |
| 4166 | rs4137928   | 15 | 97377780  | C | C    | C | A | C | A |
| 4167 | mCV24679384 | 15 | 100437705 | A | A    | A | A | A | A |
| 4168 | rs6223057   | 15 | 97361752  | A | A    | A | A | A | A |
| 4169 | rs6157094   | 15 | 97502119  | G | G    | G | G | G | G |
| 4170 | rs3023427   | 15 | 98170960  | A | A    | A | G | G | G |
| 4171 | rs3710056   | 15 | 98027162  | G | A    | A | A | G | A |
| 4172 | rs4230983   | 15 | 99065701  | A | A    | A | A | A | A |
| 4173 | rs3708604   | 15 | 99587030  | G | G    | G | A | A | A |
| 4174 | rs3724301   | 15 | 99587247  | G | G    | G | A | A | A |
| 4175 | rs3657663   | 15 | 99751532  | A | G    | G | G | G | G |
| 4176 | rs2228905   | 15 | 99931008  | A | A    | A | A | A | A |
| 4177 | rs8243599   | 15 | 100049005 | G | G    | G | G | G | G |
| 4178 | rs3710400   | 15 | 99979161  | G | G    | G | G | G | G |
| 4179 | rs6284372   | 15 | 99970514  | A | A    | A | A | A | A |
| 4180 | rs4231011   | 15 | 99956969  | T | T    | T | T | T | T |
| 4181 | rs8277965   | 15 | 100181270 | G | G    | G | G | G | G |
| 4182 | rs8277942   | 15 | 100183726 | G | G    | G | G | G | G |
| 4183 | rs6313951   | 15 | 100853609 | A | G    | G | G | G | G |
| 4184 | rs6180802   | 15 | 100983246 | T | T    | T | T | T | T |
| 4185 | rs3703836   | 15 | 101045753 | A | G    | G | G | G | G |
| 4186 | rs3023430   | 15 | 101265090 | G | G    | G | A | A | A |
| 4187 | mCV24986357 | 15 | 102844147 | G | G    | G | G | A | A |
| 4188 | rs3690173   | 15 | 101419686 | A | A    | G | A | A | A |
| 4189 | rs3716382   | 15 | 101503749 | G | G    | A | G | G | G |
| 4190 | rs4231016   | 15 | 101758006 | A | A    | A | A | A | A |
| 4191 | rs8266829   | 15 | 102476882 | G | G    | G | G | G | G |
| 4192 | rs8278021   | 15 | 102479134 | A | G    | G | A | A | A |
| 4193 | rs8266850   | 15 | 102483342 | G | G    | G | G | G | G |
| 4194 | rs3665003   | 15 | 102312000 | A | A    | A | G | G | G |
| 4195 | rs4232432   | 15 | 104297014 | G | A    | A | G | G | G |
| 4196 | rs4231028   | 15 | 102816296 | G | G    | G | G | G | G |
| 4197 | rs3686133   | 15 | 102839135 | G | A    | A | A | G | G |
| 4198 | rs6248280   | 15 | 103154767 | A | A    | A | A | A | A |
| 4199 | rs8243680   | 15 | 103373057 | G | G    | G | G | G | G |
| 4200 | rs8243689   | 15 | 103373354 | G | G    | G | G | G | G |
| 4201 | rs6194670   | 15 | 103484696 | A | A    | A | A | A | A |
| 4202 | rs6313751   | 15 | 103963788 | T | T    | T | T | T | T |
| 4203 | rs8259830   | 15 | 104050107 | G | G    | G | G | G | G |
| 4204 | mCV25081968 | 16 | 5159604   | C | G    | C | C | C | C |
| 4205 | rs3090814   | 16 | 3369179   | C | NONE | C | C | C | C |
| 4206 | rs4152031   | 16 | 3390342   | G | A    | G | G | G | G |
| 4207 | rs4152177   | 16 | 3494902   | A | G    | A | A | A | A |
| 4208 | rs4152477   | 16 | 3769762   | G | G    | A | G | A | G |
| 4209 | rs4152638   | 16 | 4009670   | C | A    | C | C | C | A |
| 4210 | rs4152662   | 16 | 4038800   | A | G    | A | A | A | A |
| 4211 | rs6366512   | 16 | 4090693   | A | A    | A | A | A | A |
| 4212 | rs6279796   | 16 | 4342086   | A | A    | A | A | A | A |
| 4213 | rs4153071   | 16 | 4796501   | A | G    | A | A | A | A |
| 4214 | rs4153455   | 16 | 5460178   | A | G    | A | G | A | A |
| 4215 | rs4153739   | 16 | 5572336   | A | A    | A | G | A | A |

|      |             |    |          |   |   |   |   |   |   |
|------|-------------|----|----------|---|---|---|---|---|---|
| 4216 | rs3715939   | 16 | 5648501  | A | A | A | C | A | A |
| 4217 | rs4153988   | 16 | 5659561  | G | G | G | A | G | G |
| 4218 | rs4137339   | 16 | 5679591  | A | G | A | G | A | A |
| 4219 | rs4231060   | 16 | 5907681  | G | G | G | A | G | G |
| 4220 | rs4154990   | 16 | 6048671  | G | C | G | G | G | G |
| 4221 | rs4155438   | 16 | 6232868  | G | G | G | A | G | G |
| 4222 | rs3704351   | 16 | 6401450  | A | A | A | G | A | A |
| 4223 | rs4155963   | 16 | 6441976  | A | G | A | G | A | A |
| 4224 | rs4156029   | 16 | 6463662  | A | G | A | A | A | A |
| 4225 | rs4157459   | 16 | 7042170  | A | G | A | G | A | A |
| 4226 | rs6317732   | 16 | 6956400  | C | C | C | C | C | C |
| 4227 | rs3722676   | 16 | 7018645  | C | C | C | A | C | C |
| 4228 | rs4157579   | 16 | 7076593  | C | C | C | A | C | C |
| 4229 | mCV24135489 | 16 | 9065553  | G | A | A | A | A | A |
| 4230 | rs4158858   | 16 | 7624420  | A | A | A | C | A | A |
| 4231 | mCV24137593 | 16 | 9382078  | C | G | G | G | G | G |
| 4232 | rs4158669   | 16 | 7551144  | A | A | A | G | A | A |
| 4233 | rs4159179   | 16 | 7898007  | G | A | G | G | G | G |
| 4234 | rs4159502   | 16 | 8344201  | G | A | A | G | G | G |
| 4235 | rs4159500   | 16 | 8342534  | A | C | G | A | A | A |
| 4236 | mCV25079489 | 16 | 10392473 | A | A | G | A | G | A |
| 4237 | rs6269373   | 16 | 8588636  | A | A | A | A | A | A |
| 4238 | rs4160001   | 16 | 8746700  | A | G | G | G | G | G |
| 4239 | rs4160175   | 16 | 9046289  | G | A | A | A | A | A |
| 4240 | rs6214903   | 16 | 9327286  | T | T | T | T | T | T |
| 4241 | rs4160502   | 16 | 9563944  | G | A | G | G | G | G |
| 4242 | mCV24142461 | 16 | 11702908 | G | G | G | G | G | G |
| 4243 | mCV24977246 | 16 | 11983431 | G | A | A | A | A | A |
| 4244 | rs6400658   | 16 | 10299195 | A | A | A | A | A | A |
| 4245 | rs4161204   | 16 | 10478118 | G | G | A | G | A | G |
| 4246 | rs8247634   | 16 | 10480804 | G | G | G | G | G | G |
| 4247 | rs8247631   | 16 | 10480879 | G | G | G | G | G | G |
| 4248 | rs8247613   | 16 | 10482015 | A | A | G | A | G | A |
| 4249 | rs4161987   | 16 | 11495439 | A | G | G | G | G | G |
| 4250 | mCV23923315 | 16 | 11438937 | G | G | A | G | A | G |
| 4251 | mCV24860404 | 16 | 11442136 | G | G | A | G | A | G |
| 4252 | mCV24860403 | 16 | 11443214 | A | A | C | A | C | A |
| 4253 | mCV24860402 | 16 | 11443464 | A | A | G | A | G | A |
| 4254 | mCV24860380 | 16 | 13583636 | G | G | A | G | A | G |
| 4255 | mCV24860047 | 16 | 13589855 | G | G | A | G | A | G |
| 4256 | mCV24860024 | 16 | 11455935 | A | A | G | A | G | A |
| 4257 | mCV24859728 | 16 | 13599753 | T | T | A | T | A | T |
| 4258 | mCV24859714 | 16 | 13603718 | G | G | G | G | G | G |
| 4259 | mCV24859704 | 16 | 13603915 | T | T | A | T | A | T |
| 4260 | mCV24859691 | 16 | 11468568 | A | A | C | A | C | A |
| 4261 | mCV24859373 | 16 | 13615843 | A | A | T | A | T | A |
| 4262 | mCV24859372 | 16 | 13617549 | G | G | A | G | A | G |
| 4263 | mCV24859361 | 16 | 11480824 | T | T | A | T | A | T |
| 4264 | mCV24859360 | 16 | 13618676 | G | G | A | G | A | G |
| 4265 | mCV24859314 | 16 | 13627029 | G | G | C | G | C | G |
| 4266 | mCV24859313 | 16 | 13627964 | G | G | A | G | A | G |
| 4267 | mCV25086629 | 16 | 13638633 | G | G | A | G | A | G |
| 4268 | mCV25086630 | 16 | 13643062 | A | A | G | A | G | A |
| 4269 | mCV25086642 | 16 | 13644853 | A | A | G | A | G | A |
| 4270 | rs4162309   | 16 | 11810304 | G | A | G | A | G | A |
| 4271 | rs6289275   | 16 | 12160073 | A | A | A | A | A | A |
| 4272 | rs4162816   | 16 | 12222405 | G | A | G | A | G | A |
| 4273 | mCV25090130 | 16 | 15165208 | A | G | G | G | G | G |
| 4274 | rs4163391   | 16 | 13336999 | A | A | G | A | G | A |
| 4275 | rs6389023   | 16 | 13434430 | C | C | C | C | C | C |
| 4276 | rs4163522   | 16 | 13583499 | A | A | C | A | C | A |
| 4277 | rs4163524   | 16 | 13584690 | G | G | A | G | A | G |
| 4278 | rs4163525   | 16 | 13584746 | G | G | A | G | A | G |
| 4279 | rs4163530   | 16 | 13585282 | A | A | G | A | G | A |
| 4280 | rs4163531   | 16 | 13585948 | G | G | A | G | A | G |
| 4281 | rs4163535   | 16 | 13587202 | A | A | G | A | G | A |
| 4282 | rs4163536   | 16 | 13587541 | G | G | A | G | A | G |
| 4283 | rs4163537   | 16 | 13588240 | A | A | C | A | C | A |
| 4284 | rs4163540   | 16 | 13589681 | A | A | G | A | G | A |
| 4285 | rs4163544   | 16 | 13408832 | G | G | C | G | C | G |
| 4286 | rs4163549   | 16 | 13415606 | A | A | G | A | G | A |
| 4287 | rs4163552   | 16 | 13599508 | A | A | C | A | C | A |
| 4288 | rs4163554   | 16 | 13602647 | A | A | C | A | C | A |
| 4289 | rs4163555   | 16 | 13602851 | G | G | A | G | A | G |

|      |             |    |          |   |      |   |   |   |      |
|------|-------------|----|----------|---|------|---|---|---|------|
| 4290 | rs4163557   | 16 | 13604441 | A | A    | T | A | T | A    |
| 4291 | rs4163558   | 16 | 13604905 | C | C    | A | C | A | C    |
| 4292 | rs4163560   | 16 | 13606893 | G | G    | A | G | A | G    |
| 4293 | rs4163561   | 16 | 13606964 | A | A    | G | A | G | A    |
| 4294 | rs4163563   | 16 | 13609071 | A | A    | G | A | G | A    |
| 4295 | rs4163564   | 16 | 13609336 | A | A    | G | A | G | A    |
| 4296 | rs4163565   | 16 | 13611038 | G | G    | A | G | A | G    |
| 4297 | rs4163566   | 16 | 13613650 | C | C    | G | C | G | C    |
| 4298 | rs4163570   | 16 | 13615134 | A | A    | G | A | G | A    |
| 4299 | rs4163571   | 16 | 13615522 | A | A    | C | A | C | A    |
| 4300 | rs6399033   | 16 | 13618752 | A | A    | A | A | A | A    |
| 4301 | rs6400154   | 16 | 13618969 | C | C    | C | C | C | C    |
| 4302 | rs4163580   | 16 | 13441064 | A | A    | G | A | G | A    |
| 4303 | rs4163581   | 16 | 13623853 | C | C    | A | C | A | C    |
| 4304 | rs4163588   | 16 | 13635521 | A | A    | C | A | C | A    |
| 4305 | rs4163589   | 16 | 13635554 | A | A    | T | A | T | A    |
| 4306 | rs4163590   | 16 | 13454476 | C | C    | A | C | A | C    |
| 4307 | rs6218550   | 16 | 13642026 | G | G    | G | G | G | G    |
| 4308 | rs4163594   | 16 | 13643729 | A | A    | G | A | G | A    |
| 4309 | rs4163596   | 16 | 13645281 | A | A    | G | A | G | A    |
| 4310 | rs3090019   | 16 | 13645514 | A | A    | C | A | C | A    |
| 4311 | rs4163599   | 16 | 13646511 | A | A    | G | A | G | A    |
| 4312 | rs4163600   | 16 | 13646717 | G | G    | A | G | A | G    |
| 4313 | rs4163601   | 16 | 13646827 | G | G    | C | G | C | G    |
| 4314 | rs8262762   | 16 | 14104647 | C | C    | C | C | C | C    |
| 4315 | rs4164131   | 16 | 14121267 | A | A    | C | A | C | A    |
| 4316 | rs3673183   | 16 | 14235488 | A | A    | G | A | G | A    |
| 4317 | rs3714738   | 16 | 14439293 | C | C    | A | C | A | C    |
| 4318 | rs4164872   | 16 | 15291555 | A | G    | G | G | G | G    |
| 4319 | rs4164956   | 16 | 15549541 | G | G    | G | G | G | G    |
| 4320 | rs4164966   | 16 | 15666087 | A | G    | G | G | G | G    |
| 4321 | rs6392982   | 16 | 16863464 | A | A    | A | A | A | A    |
| 4322 | rs8246557   | 16 | 17110007 | A | A    | A | A | A | A    |
| 4323 | rs6178432   | 16 | 17256501 | G | G    | G | G | G | G    |
| 4324 | mCV24708470 | 16 | 21170888 | G | G    | G | A | G | G    |
| 4325 | mCV25133592 | 16 | 21911205 | G | G    | G | G | G | G    |
| 4326 | rs4165233   | 16 | 19700960 | A | G    | A | A | A | A    |
| 4327 | rs8264262   | 16 | 20137094 | G | G    | G | G | G | G    |
| 4328 | rs8260417   | 16 | 20176415 | G | G    | G | G | G | G    |
| 4329 | rs4165119   | 16 | 20271529 | C | A    | C | C | C | C    |
| 4330 | rs4165123   | 16 | 20272798 | A | NONE | A | A | A | A    |
| 4331 | rs4231117   | 16 | 20277159 | A | A    | A | A | A | A    |
| 4332 | rs4165089   | 16 | 19895572 | G | G    | G | G | G | G    |
| 4333 | rs6268760   | 16 | 21070545 | G | G    | G | G | G | G    |
| 4334 | mCV25141749 | 16 | 23519271 | A | A    | G | A | G | A    |
| 4335 | mCV23928196 | 16 | 21862451 | T | T    | A | T | A | T    |
| 4336 | mCV25142322 | 16 | 24203919 | G | G    | G | G | G | G    |
| 4337 | rs4165301   | 16 | 22649634 | A | A    | G | A | G | A    |
| 4338 | rs4174828   | 16 | 38664052 | A | C    | C | A | C | A    |
| 4339 | rs6306333   | 16 | 22896033 | A | A    | A | A | A | A    |
| 4340 | rs4174328   | 16 | 37931116 | A | G    | A | A | A | G    |
| 4341 | rs4174278   | 16 | 23413634 | G | A    | G | A | G | A    |
| 4342 | mCV25142331 | 16 | 24401446 | G | A    | G | G | G | G    |
| 4343 | mCV23929196 | 16 | 26966102 | G | G    | G | G | G | G    |
| 4344 | rs6204510   | 16 | 25318250 | G | G    | G | G | G | G    |
| 4345 | rs4173196   | 16 | 35664946 | A | A    | A | C | A | A    |
| 4346 | mCV23930218 | 16 | 27821402 | G | A    | A | A | G | A    |
| 4347 | rs4172977   | 16 | 25587169 | A | A    | G | G | G | NONE |
| 4348 | rs4231205   | 16 | 35505002 | G | G    | G | G | G | G    |
| 4349 | rs4172915   | 16 | 35504262 | A | A    | G | A | G | A    |
| 4350 | rs4172779   | 16 | 35388554 | G | G    | G | A | G | G    |
| 4351 | rs4172778   | 16 | 35388446 | A | A    | G | G | G | A    |
| 4352 | mCV22602314 | 16 | 28698520 | C | A    | C | C | C | A    |
| 4353 | mCV22555234 | 16 | 28878532 | G | G    | G | A | G | A    |
| 4354 | rs4172185   | 16 | 34340336 | G | A    | G | A | G | A    |
| 4355 | rs4165676   | 16 | 27339169 | G | A    | C | A | G | A    |
| 4356 | rs6240629   | 16 | 27529763 | C | A    | G | A | C | A    |
| 4357 | mCV24620624 | 16 | 27663359 | A | A    | G | G | G | A    |
| 4358 | rs4166445   | 16 | 28119031 | G | A    | G | G | G | A    |
| 4359 | mCV24708168 | 16 | 30382971 | A | G    | A | A | A | G    |
| 4360 | rs6310468   | 16 | 28227854 | A | A    | A | A | A | A    |
| 4361 | rs4167252   | 16 | 29012115 | G | G    | G | A | G | G    |
| 4362 | rs6303559   | 16 | 29367928 | A | A    | A | A | A | A    |
| 4363 | rs4167574   | 16 | 29521847 | G | G    | A | A | A | G    |

|      |             |    |          |     |      |   |   |      |     |
|------|-------------|----|----------|-----|------|---|---|------|-----|
| 4364 | rs4167865   | 16 | 29903421 | G   | G    | A | A | A    | G   |
| 4365 | rs4167955   | 16 | 30157347 | C   | C    | A | A | A    | C   |
| 4366 | rs6202375   | 16 | 30242408 | G   | G    | G | G | G    | G   |
| 4367 | rs4168118   | 16 | 30288985 | A   | G    | A | A | A    | G   |
| 4368 | mCV25020984 | 16 | 33349273 | G   | A    | A | G | A    | A   |
| 4369 | rs4167921   | 16 | 30096753 | A/C | NONE | C | C | C    | A/C |
| 4370 | rs4169271   | 16 | 31481368 | A   | A    | T | A | T    | A   |
| 4371 | rs3704997   | 16 | 31555093 | G   | G    | A | G | A    | G   |
| 4372 | rs4167594   | 16 | 29587939 | G   | G    | A | A | A    | G   |
| 4373 | rs6411352   | 16 | 31944788 | G   | G    | A | G | A    | G   |
| 4374 | mCV25154621 | 16 | 34233339 | G   | A    | G | A | G    | A   |
| 4375 | rs4170126   | 16 | 32098865 | G   | C    | G | G | G    | C   |
| 4376 | rs3676973   | 16 | 32291976 | A   | G    | C | A | G    | G   |
| 4377 | rs4167177   | 16 | 28837142 | C   | A    | C | A | C    | A   |
| 4378 | rs4170507   | 16 | 32568890 | A   | A    | G | A | G    | A   |
| 4379 | mCV23951787 | 16 | 34865535 | A   | A    | G | A | G    | A   |
| 4380 | mCV23952101 | 16 | 32503299 | A   | A    | A | A | A    | A   |
| 4381 | mCV24688032 | 16 | 34890184 | A   | A    | T | A | T    | A   |
| 4382 | mCV24688031 | 16 | 34891202 | G   | G    | A | G | A    | G   |
| 4383 | mCV24688027 | 16 | 32521226 | G   | A    | A | A | G    | A   |
| 4384 | mCV24688026 | 16 | 32521267 | A   | A    | G | A | G    | A   |
| 4385 | mCV24688020 | 16 | 34895178 | T   | T    | A | T | A    | T   |
| 4386 | mCV24499316 | 16 | 34896520 | A   | A    | C | A | C    | A   |
| 4387 | mCV24499996 | 16 | 34904371 | A   | A    | A | A | NONE | A   |
| 4388 | mCV24500003 | 16 | 34904482 | G   | A    | G | G | G    | G   |
| 4389 | rs6269088   | 16 | 32688782 | A   | G    | A | A | A    | G   |
| 4390 | mCV24500299 | 16 | 34912718 | G   | G    | G | G | G    | G   |
| 4391 | mCV24500317 | 16 | 34914990 | G   | G    | A | G | A    | G   |
| 4392 | mCV24500327 | 16 | 34917839 | A   | A    | T | A | T    | A   |
| 4393 | mCV24500633 | 16 | 34926782 | G   | G    | A | G | A    | G   |
| 4394 | mCV24500661 | 16 | 34931551 | A   | A    | G | A | G    | A   |
| 4395 | mCV24500684 | 16 | 34932582 | G   | G    | G | G | G    | G   |
| 4396 | mCV24500685 | 16 | 34933480 | G   | G    | A | G | A    | G   |
| 4397 | mCV24500686 | 16 | 34935377 | G   | G    | G | G | G    | G   |
| 4398 | rs4170974   | 16 | 32825259 | A   | C    | C | A | C    | C   |
| 4399 | mCV23952166 | 16 | 35220991 | A   | G    | A | A | A    | G   |
| 4400 | rs4166196   | 16 | 27709784 | T   | A    | T | A | T    | A   |
| 4401 | rs3669767   | 16 | 27542767 | G   | C    | G | C | G    | C   |
| 4402 | rs4165935   | 16 | 27539309 | A   | C    | A | C | A    | C   |
| 4403 | rs3682563   | 16 | 27395910 | A   | G    | A | G | A    | G   |
| 4404 | rs3682565   | 16 | 34084942 | G   | G    | A | G | A    | G   |
| 4405 | rs4171932   | 16 | 34183107 | G   | A    | G | A | G    | A   |
| 4406 | mCV25267427 | 16 | 37207323 | G   | C    | C | G | C    | G   |
| 4407 | rs4172536   | 16 | 34863462 | G   | G    | A | G | A    | G   |
| 4408 | rs4172537   | 16 | 34865150 | G   | G    | A | G | A    | G   |
| 4409 | rs4172538   | 16 | 34865363 | C   | C    | A | C | A    | C   |
| 4410 | rs4172540   | 16 | 34866225 | A   | A    | G | A | G    | A   |
| 4411 | rs4172541   | 16 | 34866637 | A   | A    | G | A | G    | A   |
| 4412 | rs4172542   | 16 | 34866726 | A   | A    | G | A | G    | A   |
| 4413 | rs4172543   | 16 | 34866987 | G   | G    | A | G | A    | G   |
| 4414 | rs4172544   | 16 | 34867146 | A   | A    | G | A | G    | A   |
| 4415 | rs4172545   | 16 | 34867794 | A   | A    | G | A | G    | A   |
| 4416 | rs4172549   | 16 | 34869987 | C   | C    | C | C | C    | C   |
| 4417 | rs4172550   | 16 | 34872385 | G   | G    | G | G | G    | G   |
| 4418 | rs4172551   | 16 | 34872662 | G   | G    | A | G | A    | G   |
| 4419 | rs4172553   | 16 | 34878098 | G   | G    | A | G | A    | G   |
| 4420 | rs4172554   | 16 | 34878125 | A   | A    | T | A | T    | A   |
| 4421 | rs4172555   | 16 | 34888810 | G   | G    | A | G | A    | G   |
| 4422 | rs4172556   | 16 | 34889709 | A   | A    | G | A | G    | A   |
| 4423 | rs4172561   | 16 | 34894996 | A   | A    | G | A | G    | A   |
| 4424 | rs4172566   | 16 | 34896422 | A   | A    | G | A | G    | A   |
| 4425 | rs4172568   | 16 | 34896682 | A   | A    | G | A | G    | A   |
| 4426 | rs4172572   | 16 | 34905982 | G   | G    | A | G | A    | G   |
| 4427 | rs4172573   | 16 | 34907084 | G   | G    | A | G | A    | G   |
| 4428 | rs4172574   | 16 | 34907452 | A   | A    | C | A | C    | A   |
| 4429 | rs4172575   | 16 | 34907880 | A   | A    | G | A | G    | A   |
| 4430 | rs4172576   | 16 | 34907881 | A   | A    | G | A | G    | A   |
| 4431 | rs4172577   | 16 | 34910451 | A   | A    | T | A | T    | A   |
| 4432 | rs4172578   | 16 | 34910632 | G   | C    | G | C | G    | C   |
| 4433 | rs4172581   | 16 | 34912763 | G   | G    | A | G | A    | G   |
| 4434 | rs4172582   | 16 | 34912876 | A   | A    | T | A | T    | A   |
| 4435 | rs4172583   | 16 | 34912939 | C   | C    | A | C | A    | C   |
| 4436 | rs4172584   | 16 | 34913289 | G   | G    | A | G | A    | G   |
| 4437 | rs4172586   | 16 | 34916564 | G   | G    | A | G | A    | G   |

|      |             |    |          |   |   |   |   |   |      |
|------|-------------|----|----------|---|---|---|---|---|------|
| 4438 | rs4172587   | 16 | 34916823 | A | A | G | A | G | A    |
| 4439 | rs4172589   | 16 | 34917907 | G | G | A | G | A | G    |
| 4440 | rs4172591   | 16 | 34919444 | C | C | A | C | A | C    |
| 4441 | rs4172592   | 16 | 34920100 | G | G | A | G | A | G    |
| 4442 | rs4172594   | 16 | 34921604 | A | A | G | A | G | A    |
| 4443 | rs4172597   | 16 | 34925480 | G | G | A | G | A | G    |
| 4444 | rs4172600   | 16 | 34926009 | G | G | A | G | A | G    |
| 4445 | rs4172601   | 16 | 34926153 | A | A | G | A | G | A    |
| 4446 | rs4172603   | 16 | 34926884 | C | G | G | G | G | G    |
| 4447 | rs4172604   | 16 | 34928730 | A | A | C | A | C | A    |
| 4448 | rs4172607   | 16 | 34930392 | G | G | C | G | C | G    |
| 4449 | rs4172609   | 16 | 34932403 | G | G | G | G | G | G    |
| 4450 | rs4151957   | 16 | 34835446 | G | G | G | G | G | G    |
| 4451 | rs4172614   | 16 | 34939199 | A | A | C | A | C | A    |
| 4452 | rs4172615   | 16 | 34939382 | A | A | G | A | G | A    |
| 4453 | rs4172616   | 16 | 34939686 | G | G | A | G | A | G    |
| 4454 | rs4172617   | 16 | 34940283 | G | G | A | G | A | G    |
| 4455 | rs4172618   | 16 | 34940529 | G | G | A | G | A | G    |
| 4456 | rs4172619   | 16 | 34940566 | G | G | A | G | A | G    |
| 4457 | rs4172620   | 16 | 34945908 | G | G | A | G | A | G    |
| 4458 | mCV24597285 | 16 | 37718819 | G | A | G | G | G | A    |
| 4459 | rs3713911   | 16 | 35390375 | T | T | T | A | T | T    |
| 4460 | rs6182184   | 16 | 35525940 | C | C | A | C | A | C    |
| 4461 | rs4173052   | 16 | 35593001 | A | A | A | A | G | A    |
| 4462 | rs4173581   | 16 | 36085515 | A | A | C | C | C | A    |
| 4463 | rs4173858   | 16 | 36461158 | G | G | A | G | A | G    |
| 4464 | rs4165446   | 16 | 24194071 | G | G | G | A | G | G    |
| 4465 | rs4173889   | 16 | 37029092 | G | A | A | G | A | G    |
| 4466 | rs4165379   | 16 | 23562396 | G | G | A | G | A | G    |
| 4467 | rs4174320   | 16 | 37922093 | G | G | A | C | G | G    |
| 4468 | rs4174329   | 16 | 37932158 | A | G | A | A | A | G    |
| 4469 | rs4174445   | 16 | 38009487 | G | A | G | G | G | A    |
| 4470 | rs8257997   | 16 | 38048936 | A | G | A | G | A | G    |
| 4471 | rs8266690   | 16 | 38105131 | G | G | G | G | G | G    |
| 4472 | rs8266683   | 16 | 38105345 | T | T | T | T | T | T    |
| 4473 | rs4151928   | 16 | 38234549 | C | G | C | G | C | G    |
| 4474 | rs4174556   | 16 | 38282605 | A | A | A | G | A | A    |
| 4475 | rs4184015   | 16 | 38287860 | A | G | A | G | G | A    |
| 4476 | rs6393632   | 16 | 38441470 | A | T | T | T | T | T    |
| 4477 | rs4183784   | 16 | 47630353 | C | G | C | G | G | G    |
| 4478 | rs4175278   | 16 | 38874983 | G | A | A | G | A | A    |
| 4479 | rs4176333   | 16 | 39357023 | A | G | G | A | G | G    |
| 4480 | rs4176739   | 16 | 39655309 | G | A | A | A | A | A    |
| 4481 | mCV24996832 | 16 | 42098996 | A | G | A | A | G | A    |
| 4482 | rs6272186   | 16 | 40010527 | T | A | A | A | A | A    |
| 4483 | mCV23981852 | 16 | 42573263 | A | A | A | A | G | A    |
| 4484 | rs4181289   | 16 | 45495631 | C | C | A | A | C | C    |
| 4485 | rs4177651   | 16 | 40548715 | A | G | A | G | G | A    |
| 4486 | rs4177843   | 16 | 40649856 | C | A | C | A | A | A    |
| 4487 | rs4180773   | 16 | 45247290 | A | A | A | G | A | A    |
| 4488 | rs4180617   | 16 | 40877889 | A | C | A | A | C | C    |
| 4489 | rs4178232   | 16 | 41204697 | C | C | C | G | C | C    |
| 4490 | mCV25295325 | 16 | 44008435 | T | A | A | A | A | A    |
| 4491 | rs4179715   | 16 | 41725411 | C | C | C | A | C | C    |
| 4492 | mCV24627853 | 16 | 44560050 | G | A | G | G | A | G    |
| 4493 | rs4178975   | 16 | 41968873 | A | G | A | A | G | G    |
| 4494 | rs6238066   | 16 | 41986490 | G | G | G | G | G | G    |
| 4495 | rs6350435   | 16 | 42306986 | G | G | G | G | G | G    |
| 4496 | rs4179189   | 16 | 43401450 | G | A | G | G | A | G    |
| 4497 | rs3700978   | 16 | 43420279 | A | G | A | A | G | A    |
| 4498 | rs4179213   | 16 | 43469324 | C | G | C | C | G | C    |
| 4499 | rs4179226   | 16 | 43482236 | G | A | G | G | A | G    |
| 4500 | mCV22314190 | 16 | 46754869 | G | A | G | A | A | G    |
| 4501 | rs4179525   | 16 | 44160251 | G | A | A | G | A | A    |
| 4502 | rs3713966   | 16 | 44190062 | A | G | G | A | G | G    |
| 4503 | rs3663871   | 16 | 41553441 | G | G | G | A | G | G    |
| 4504 | rs6235507   | 16 | 44357850 | G | G | G | G | G | G    |
| 4505 | rs4179972   | 16 | 44416516 | G | G | G | G | G | G    |
| 4506 | mCV24002758 | 16 | 47453062 | C | G | C | G | G | NONE |
| 4507 | rs4180198   | 16 | 44995920 | C | C | C | A | C | C    |
| 4508 | rs3683872   | 16 | 45016428 | A | A | A | G | A | A    |
| 4509 | rs3723465   | 16 | 45139003 | A | A | A | G | A | A    |
| 4510 | rs4177731   | 16 | 40572103 | A | C | A | C | C | A    |
| 4511 | rs4180943   | 16 | 45316519 | G | G | A | A | G | G    |

|      |             |    |          |   |   |   |   |   |   |
|------|-------------|----|----------|---|---|---|---|---|---|
| 4512 | rs4181286   | 16 | 45494924 | C | C | G | G | C | C |
| 4513 | rs6166655   | 16 | 45834712 | A | A | G | A | A | A |
| 4514 | rs4182243   | 16 | 46008686 | A | A | A | G | G | A |
| 4515 | mCV24006964 | 16 | 49194598 | G | A | G | A | A | A |
| 4516 | rs4175670   | 16 | 46834401 | C | G | G | C | G | G |
| 4517 | rs4175353   | 16 | 38902653 | C | C | A | C | A | C |
| 4518 | rs3681038   | 16 | 38852853 | A | G | G | A | G | G |
| 4519 | rs6238945   | 16 | 46845314 | A | A | G | A | A | A |
| 4520 | rs4191391   | 16 | 59401514 | G | G | A | A | G | G |
| 4521 | rs4183434   | 16 | 47142702 | C | A | A | A | A | A |
| 4522 | mCV24009752 | 16 | 50117608 | A | T | T | T | T | A |
| 4523 | rs3695839   | 16 | 47214540 | G | A | G | A | A | A |
| 4524 | rs3682852   | 16 | 47217625 | G | A | G | A | A | A |
| 4525 | rs4184240   | 16 | 48201421 | G | A | G | A | A | A |
| 4526 | rs4189588   | 16 | 48656837 | G | A | G | G | A | G |
| 4527 | mCV22565990 | 16 | 51371684 | C | G | G | C | G | G |
| 4528 | rs4189244   | 16 | 49164403 | G | G | A | A | G | A |
| 4529 | rs4184636   | 16 | 49286349 | C | A | C | A | A | A |
| 4530 | rs4188825   | 16 | 56837969 | G | A | A | G | A | A |
| 4531 | rs3655094   | 16 | 49685695 | A | A | G | A | A | A |
| 4532 | rs6378040   | 16 | 49764473 | G | G | A | G | G | G |
| 4533 | rs4185639   | 16 | 50209266 | T | A | A | A | A | T |
| 4534 | rs6392667   | 16 | 50394916 | A | A | G | A | A | A |
| 4535 | rs6317515   | 16 | 51012277 | G | G | G | G | G | G |
| 4536 | rs4186353   | 16 | 51034616 | C | A | A | C | A | A |
| 4537 | mCV24014260 | 16 | 54658355 | G | G | G | G | G | G |
| 4538 | mCV24014967 | 16 | 55283802 | A | T | T | T | T | T |
| 4539 | rs6267334   | 16 | 52277646 | A | A | A | A | A | A |
| 4540 | rs6164817   | 16 | 53018300 | G | G | G | G | G | G |
| 4541 | rs3688027   | 16 | 52746994 | G | G | A | G | G | A |
| 4542 | rs6323896   | 16 | 53268570 | A | A | G | A | A | G |
| 4543 | rs3702995   | 16 | 54057346 | G | G | A | G | G | A |
| 4544 | rs4186939   | 16 | 51477443 | C | G | G | C | G | G |
| 4545 | rs3687272   | 16 | 54658095 | A | A | G | A | A | G |
| 4546 | rs3719157   | 16 | 51015659 | G | A | A | G | A | A |
| 4547 | rs4187596   | 16 | 55549353 | C | A | A | A | A | C |
| 4548 | rs4185336   | 16 | 49923287 | A | G | G | G | G | A |
| 4549 | rs6271301   | 16 | 56191357 | G | G | G | G | G | G |
| 4550 | rs4135604   | 16 | 49690572 | C | A | C | A | A | A |
| 4551 | rs3690619   | 16 | 49339572 | A | G | A | G | G | G |
| 4552 | rs4184685   | 16 | 49326695 | G | A | A | A | A | A |
| 4553 | rs6372156   | 16 | 56592997 | A | A | A | A | A | A |
| 4554 | rs4188545   | 16 | 56657953 | G | G | A | A | G | A |
| 4555 | rs4188555   | 16 | 56662517 | A | A | T | T | A | A |
| 4556 | rs3705921   | 16 | 49066582 | C | A | C | A | A | A |
| 4557 | rs6230371   | 16 | 57366574 | C | C | G | G | C | G |
| 4558 | rs3682166   | 16 | 57605776 | G | G | G | A | G | G |
| 4559 | mCV23483721 | 16 | 60842443 | G | A | G | G | A | G |
| 4560 | rs4189478   | 16 | 57732226 | A | A | G | G | A | G |
| 4561 | rs4189488   | 16 | 57736912 | A | A | G | G | A | G |
| 4562 | rs4192158   | 16 | 59914801 | T | T | A | A | T | T |
| 4563 | rs3023435   | 16 | 58492725 | A | G | A | A | G | G |
| 4564 | rs4190088   | 16 | 58492828 | G | A | G | G | A | G |
| 4565 | rs4190470   | 16 | 58816553 | A | G | A | A | G | G |
| 4566 | rs3023244   | 16 | 58937944 | G | G | A | G | G | G |
| 4567 | rs6170261   | 16 | 59302156 | G | G | A | A | G | G |
| 4568 | rs4191319   | 16 | 59356414 | A | A | A | G | A | A |
| 4569 | mCV22518012 | 16 | 59879230 | C | C | C | G | C | G |
| 4570 | rs6324074   | 16 | 59951151 | A | T | T | A | T | T |
| 4571 | mCV24047247 | 16 | 63693630 | A | A | A | G | A | G |
| 4572 | rs6292952   | 16 | 60766441 | A | A | A | A | A | A |
| 4573 | rs4194624   | 16 | 63381090 | A | A | A | G | A | G |
| 4574 | rs6191049   | 16 | 61522286 | A | A | A | A | A | A |
| 4575 | rs4193194   | 16 | 61748509 | A | A | A | T | A | T |
| 4576 | rs6246780   | 16 | 61792843 | A | A | A | G | A | G |
| 4577 | mCV24666082 | 16 | 65120566 | C | A | A | C | A | C |
| 4578 | rs4194213   | 16 | 62402521 | A | A | A | G | A | G |
| 4579 | rs6341030   | 16 | 62114841 | A | A | A | C | A | C |
| 4580 | rs6271608   | 16 | 62362660 | C | C | C | C | C | C |
| 4581 | rs4194166   | 16 | 62377824 | T | T | T | A | T | A |
| 4582 | rs3693435   | 16 | 62531264 | G | G | G | C | G | G |
| 4583 | rs3675841   | 16 | 63307194 | A | A | A | C | A | C |
| 4584 | rs4194670   | 16 | 63413889 | G | G | G | A | G | A |
| 4585 | rs3687551   | 16 | 63841477 | G | G | G | A | G | A |

|      |             |    |          |   |   |   |   |   |   |
|------|-------------|----|----------|---|---|---|---|---|---|
| 4586 | rs4196573   | 16 | 65870790 | C | C | C | A | C | A |
| 4587 | mCV22528126 | 16 | 67409333 | A | G | G | A | G | G |
| 4588 | rs3675347   | 16 | 64035439 | G | G | G | A | G | A |
| 4589 | rs6192780   | 16 | 64331247 | G | G | G | A | G | A |
| 4590 | rs4197222   | 16 | 66614508 | A | A | A | G | A | G |
| 4591 | rs4197265   | 16 | 66628728 | G | G | G | A | G | A |
| 4592 | mCV24067077 | 16 | 68251776 | G | A | A | G | A | G |
| 4593 | rs6251709   | 16 | 64864742 | A | C | C | A | C | A |
| 4594 | rs4197634   | 16 | 67150805 | G | G | G | A | G | A |
| 4595 | mCV24067730 | 16 | 68668611 | G | C | C | G | C | C |
| 4596 | rs3693190   | 16 | 65622689 | A | A | A | G | A | G |
| 4597 | rs6188665   | 16 | 65694286 | A | A | A | G | A | G |
| 4598 | rs4198012   | 16 | 66481437 | A | G | G | A | G | G |
| 4599 | rs4197150   | 16 | 66573423 | G | G | G | C | G | C |
| 4600 | rs3673897   | 16 | 66604122 | G | G | G | A | G | A |
| 4601 | rs3690033   | 16 | 66604407 | G | G | G | C | G | C |
| 4602 | mCV23116957 | 16 | 70337916 | A | A | A | C | A | A |
| 4603 | rs6375426   | 16 | 67097218 | C | C | C | C | C | C |
| 4604 | rs6337165   | 16 | 69646244 | C | C | C | C | C | C |
| 4605 | rs4199265   | 16 | 70091526 | A | G | G | A | G | A |
| 4606 | rs4199313   | 16 | 70130456 | A | G | G | A | G | A |
| 4607 | rs3695481   | 16 | 68172163 | A | G | G | A | G | G |
| 4608 | rs6183224   | 16 | 68216382 | C | A | A | C | A | A |
| 4609 | rs4198313   | 16 | 68385359 | G | A | A | G | A | G |
| 4610 | rs4198354   | 16 | 68415912 | A | A | A | A | A | A |
| 4611 | rs4198503   | 16 | 68513227 | G | A | A | G | A | A |
| 4612 | rs4200381   | 16 | 71256187 | A | A | A | T | A | A |
| 4613 | rs4198737   | 16 | 69301525 | A | G | G | A | G | A |
| 4614 | rs4198912   | 16 | 69399222 | A | G | G | A | G | A |
| 4615 | rs6223046   | 16 | 69549391 | G | G | G | G | G | G |
| 4616 | rs4199279   | 16 | 70098199 | A | G | G | A | G | A |
| 4617 | rs4201710   | 16 | 72678419 | G | G | G | A | G | A |
| 4618 | rs3668777   | 16 | 70648699 | T | T | T | A | T | T |
| 4619 | rs4199605   | 16 | 70682046 | C | C | C | G | C | C |
| 4620 | rs4202239   | 16 | 73028404 | G | G | G | A | G | G |
| 4621 | rs6280325   | 16 | 71105209 | A | A | A | A | A | A |
| 4622 | rs4202837   | 16 | 73635230 | C | C | A | A | A | A |
| 4623 | rs4200756   | 16 | 71507609 | G | G | G | A | G | G |
| 4624 | rs6392872   | 16 | 71548069 | A | A | A | A | A | A |
| 4625 | rs4203040   | 16 | 72209792 | A | C | A | A | A | A |
| 4626 | rs4200913   | 16 | 71633618 | G | G | G | A | G | G |
| 4627 | mCV24097201 | 16 | 72294606 | A | C | A | A | C | A |
| 4628 | rs4203387   | 16 | 72441600 | G | A | G | G | G | G |
| 4629 | rs4204213   | 16 | 74635142 | A | A | A | G | A | A |
| 4630 | rs4201178   | 16 | 72338365 | A | A | A | T | A | T |
| 4631 | rs4205362   | 16 | 75409933 | A | C | A | A | C | A |
| 4632 | rs3710273   | 16 | 72956607 | G | G | G | A | G | G |
| 4633 | rs3721202   | 16 | 73110160 | A | A | A | T | A | A |
| 4634 | rs4205586   | 16 | 75963073 | A | A | G | G | A | G |
| 4635 | mCV24705846 | 16 | 77599196 | C | A | C | C | A | C |
| 4636 | rs4206363   | 16 | 76745925 | T | A | T | T | A | T |
| 4637 | rs4203607   | 16 | 74269568 | A | G | A | A | A | A |
| 4638 | rs6296788   | 16 | 74380193 | A | A | A | A | A | A |
| 4639 | rs4204016   | 16 | 74511014 | A | G | A | G | A | A |
| 4640 | rs4204017   | 16 | 74511918 | A | A | A | T | A | A |
| 4641 | rs4204106   | 16 | 74547672 | G | A | G | G | G | G |
| 4642 | rs3702474   | 16 | 74596958 | A | C | A | C | A | A |
| 4643 | rs4135423   | 16 | 74745250 | T | T | T | A | T | T |
| 4644 | rs4204682   | 16 | 75017568 | G | G | G | A | G | G |
| 4645 | rs4204972   | 16 | 75165503 | A | A | A | G | A | A |
| 4646 | rs3704648   | 16 | 75223291 | A | A | A | G | A | A |
| 4647 | rs4205049   | 16 | 75234135 | A | A | A | T | A | A |
| 4648 | rs4208073   | 16 | 76780682 | A | G | A | A | G | G |
| 4649 | rs4208299   | 16 | 78728146 | A | A | G | G | A | A |
| 4650 | rs4206327   | 16 | 76732911 | G | G | C | C | G | C |
| 4651 | rs4206340   | 16 | 76739638 | C | A | C | C | A | C |
| 4652 | rs3718160   | 16 | 77227010 | A | A | C | C | A | C |
| 4653 | rs4206932   | 16 | 77372676 | A | G | A | A | G | A |
| 4654 | rs4210182   | 16 | 80506732 | G | G | A | A | G | G |
| 4655 | rs4210483   | 16 | 80733536 | T | T | A | A | T | T |
| 4656 | rs4207939   | 16 | 78410075 | G | A | A | A | A | A |
| 4657 | rs3685106   | 16 | 78701660 | A | A | G | G | A | A |
| 4658 | rs3703235   | 16 | 78953738 | A | A | G | G | A | A |
| 4659 | rs4208684   | 16 | 79017309 | A | A | C | C | A | A |

|      |             |    |          |     |   |   |   |   |   |
|------|-------------|----|----------|-----|---|---|---|---|---|
| 4660 | rs6253229   | 16 | 79176635 | G   | G | A | A | G | G |
| 4661 | rs8269978   | 16 | 79319085 | A   | A | A | A | A | A |
| 4662 | rs4209296   | 16 | 79788451 | G   | A | G | G | A | A |
| 4663 | rs6317052   | 16 | 79873189 | A   | G | A | A | G | G |
| 4664 | rs4209716   | 16 | 80021082 | G   | A | G | G | A | A |
| 4665 | rs6277318   | 16 | 80131512 | A   | A | A | A | A | A |
| 4666 | rs4211580   | 16 | 83004243 | G   | G | G | A | G | G |
| 4667 | mCV22598580 | 16 | 84525962 | G   | G | A | A | G | G |
| 4668 | rs4210541   | 16 | 80752355 | G   | G | G | A | G | G |
| 4669 | rs3673156   | 16 | 80837451 | G   | G | A | A | G | G |
| 4670 | rs3693437   | 16 | 80854395 | G   | G | A | A | G | G |
| 4671 | rs4211783   | 16 | 84604484 | A   | A | A | C | A | A |
| 4672 | rs4211850   | 16 | 84666984 | T   | T | T | A | T | T |
| 4673 | rs6163781   | 16 | 82570740 | A   | A | A | A | A | A |
| 4674 | rs4212088   | 16 | 83612058 | G   | A | A | G | A | A |
| 4675 | mCV24707406 | 16 | 86831905 | C   | A | A | C | A | A |
| 4676 | rs6175321   | 16 | 83036185 | G   | G | G | A | G | G |
| 4677 | rs4212843   | 16 | 84538678 | G   | A | A | A | A | A |
| 4678 | rs4213285   | 16 | 86848205 | T   | A | A | T | A | A |
| 4679 | rs4213806   | 16 | 87453292 | G   | A | A | A | A | A |
| 4680 | rs4213876   | 16 | 87532305 | G   | G | G | A | A | G |
| 4681 | rs6193471   | 16 | 84822534 | T   | T | T | T | T | T |
| 4682 | mCV24131870 | 16 | 88997358 | A   | A | A | A | G | A |
| 4683 | rs3680665   | 16 | 84938923 | C   | C | C | G | C | C |
| 4684 | rs4214481   | 16 | 87974508 | G   | G | G | A | A | G |
| 4685 | rs4214515   | 16 | 87987764 | A   | G | G | G | G | G |
| 4686 | rs4212102   | 16 | 85479261 | A   | G | G | A | G | G |
| 4687 | rs4212186   | 16 | 85547887 | A   | G | G | A | G | G |
| 4688 | rs3693968   | 16 | 85680818 | G   | A | A | G | A | A |
| 4689 | rs4215067   | 16 | 88615411 | A   | G | A | G | A | G |
| 4690 | rs3724196   | 16 | 86336602 | A   | A | A | G | A | A |
| 4691 | rs6412407   | 16 | 86336950 | C   | C | C | C | C | C |
| 4692 | rs4212842   | 16 | 86413307 | G   | A | A | A | A | A |
| 4693 | rs4213071   | 16 | 86574244 | C   | C | C | A | C | C |
| 4694 | rs4217260   | 16 | 87711454 | G   | G | G | G | A | A |
| 4695 | rs3709512   | 16 | 86877439 | A   | G | G | A | G | G |
| 4696 | rs3656592   | 16 | 87019209 | G   | G | G | G | G | G |
| 4697 | mCV23505219 | 16 | 80910418 | A   | A | G | G | A | A |
| 4698 | rs3674782   | 16 | 87743655 | G   | A | A | G | G | A |
| 4699 | rs4214396   | 16 | 87920304 | A   | C | C | A | A | C |
| 4700 | rs4214683   | 16 | 88131565 | A   | A | A | A | G | A |
| 4701 | rs6231616   | 16 | 88285205 | A   | A | A | A | A | A |
| 4702 | rs4214876   | 16 | 88417690 | A/G | A | A | A | A | A |
| 4703 | rs4214924   | 16 | 88462563 | A   | A | A | A | G | A |
| 4704 | rs4214927   | 16 | 88462890 | G   | G | G | G | A | G |
| 4705 | rs4151940   | 16 | 89077062 | A   | G | G | G | G | G |
| 4706 | rs4215932   | 16 | 89363885 | G   | A | A | A | G | A |
| 4707 | rs4216460   | 16 | 89791987 | A   | A | A | A | G | A |
| 4708 | rs4216475   | 16 | 89881415 | A   | C | C | C | A | C |
| 4709 | rs4216686   | 16 | 90020366 | A   | A | A | A | G | A |
| 4710 | rs4217297   | 16 | 90768465 | A   | G | A | G | A | A |
| 4711 | rs4219555   | 16 | 91815141 | A   | G | G | A | G | A |
| 4712 | rs6350538   | 16 | 91087963 | G   | A | A | A | G | A |
| 4713 | rs4218306   | 16 | 91297440 | G   | A | A | A | G | G |
| 4714 | mCV23083514 | 16 | 94883773 | A   | C | C | C | C | C |
| 4715 | rs4219040   | 16 | 91664240 | C   | C | C | A | C | C |
| 4716 | rs4217722   | 16 | 91044215 | A   | C | C | C | A | C |
| 4717 | rs4219239   | 16 | 92134520 | A   | G | G | A | G | A |
| 4718 | rs4217339   | 16 | 90796276 | G   | A | A | A | G | G |
| 4719 | mCV24560371 | 16 | 96083785 | A   | G | G | G | G | A |
| 4720 | rs8273839   | 16 | 98411195 | C   | C | C | C | C | C |
| 4721 | mCV25389795 | 16 | 96645024 | G   | G | G | G | G | G |
| 4722 | rs4221562   | 16 | 94186146 | G   | G | G | A | G | G |
| 4723 | rs6244229   | 16 | 93114728 | G   | G | G | G | G | G |
| 4724 | rs4219905   | 16 | 93471889 | G   | G | G | A | G | G |
| 4725 | rs6220581   | 16 | 93605148 | A   | A | A | A | A | A |
| 4726 | rs3664190   | 16 | 93793383 | A   | A | A | G | A | A |
| 4727 | rs3664755   | 16 | 93793468 | T   | T | T | A | T | T |
| 4728 | rs6233949   | 16 | 93869618 | C   | C | C | A | C | C |
| 4729 | mCV22746950 | 16 | 97849087 | A   | A | A | T | A | A |
| 4730 | rs6375622   | 16 | 94420190 | G   | G | G | A | G | G |
| 4731 | rs4220238   | 16 | 94472710 | G   | G | G | A | G | G |
| 4732 | rs6266287   | 16 | 94485971 | A   | A | A | A | A | A |
| 4733 | mCV23740174 | 16 | 96092689 | A   | A | A | G | A | A |



|      |             |    |          |   |   |   |   |   |   |
|------|-------------|----|----------|---|---|---|---|---|---|
| 4734 | rs4220985   | 16 | 96803510 | G | A | A | A | A | G |
| 4735 | rs4221263   | 16 | 97024198 | C | C | C | C | C | C |
| 4736 | rs6210571   | 16 | 97032921 | A | A | A | A | A | A |
| 4737 | rs3164054   | 16 | 97820338 | A | A | A | G | A | A |
| 4738 | rs8274734   | 16 | 98377941 | G | G | G | A | G | G |
| 4739 | rs6186492   | 16 | 98395340 | A | A | A | A | A | A |
| 4740 | rs6254145   | 16 | 98481505 | A | A | A | G | A | A |
| 4741 | rs6293022   | 8  | 71443115 | A | G | A | G | A | A |
| 4742 | rs6167003   | 8  | 71508067 | G | G | G | G | G | G |
| 4743 | rs6217180   | 17 | 6152941  | G | G | G | G | G | G |
| 4744 | mCV23362339 | 17 | 5690382  | A | G | G | G | G | G |
| 4745 | rs6169874   | 17 | 5863216  | A | G | G | G | G | G |
| 4746 | rs3702143   | 17 | 5381593  | A | G | G | G | G | A |
| 4747 | rs6171073   | 17 | 5165610  | C | C | C | C | C | C |
| 4748 | rs3667161   | 17 | 5027585  | G | A | A | A | A | A |
| 4749 | rs3686875   | 17 | 4366808  | G | A | A | G | A | G |
| 4750 | rs3725494   | 17 | 4068731  | A | A | A | G | G | A |
| 4751 | rs3672598   | 17 | 3913987  | C | C | C | A | A | C |
| 4752 | rs6239530   | 17 | 3766890  | G | G | G | A | A | A |
| 4753 | rs6240560   | 17 | 3766696  | A | G | G | G | G | G |
| 4754 | rs6283871   | 17 | 3484414  | A | A | A | G | A | A |
| 4755 | rs4136382   | 17 | 3388654  | A | A | A | G | A | A |
| 4756 | rs3721166   | 17 | 3246965  | G | A | A | A | G | G |
| 4757 | rs3724616   | 17 | 3000665  | G | G | G | A | A | A |
| 4758 | rs3694629   | 17 | 6436726  | G | G | G | A | G | G |
| 4759 | rs6328815   | 17 | 6652674  | G | G | G | G | G | G |
| 4760 | rs3684897   | 17 | 6811803  | G | A | A | G | A | A |
| 4761 | rs3710006   | 17 | 6823010  | A | G | G | G | G | G |
| 4762 | mCV22941359 | 17 | 9243390  | A | G | G | A | G | A |
| 4763 | rs3660905   | 17 | 7237712  | G | C | C | G | C | C |
| 4764 | rs6191825   | 17 | 7395105  | G | G | G | G | G | G |
| 4765 | rs3688250   | 17 | 7715521  | A | G | G | A | G | G |
| 4766 | rs3706698   | 17 | 7974370  | A | G | G | G | G | G |
| 4767 | rs6249429   | 17 | 8085354  | G | G | G | G | G | G |
| 4768 | rs3722983   | 17 | 8252628  | C | C | C | A | C | C |
| 4769 | rs3723109   | 17 | 8252703  | A | A | A | G | A | A |
| 4770 | rs3090641   | 17 | 8468740  | C | A | A | A | A | A |
| 4771 | rs4231330   | 17 | 8634636  | A | A | A | A | A | A |
| 4772 | rs6372758   | 17 | 8877004  | A | A | A | A | A | A |
| 4773 | rs3665137   | 17 | 8886026  | G | G | G | A | G | A |
| 4774 | rs3702484   | 17 | 9103503  | A | A | A | A | A | A |
| 4775 | rs3714793   | 17 | 9109795  | G | A | A | A | A | A |
| 4776 | rs3662575   | 17 | 9388595  | A | G | G | A | G | A |
| 4777 | rs6244408   | 17 | 9505215  | A | A | A | A | A | A |
| 4778 | rs2020534   | 17 | 9618298  | G | G | G | G | G | G |
| 4779 | rs3656290   | 17 | 10185388 | A | G | G | A | G | A |
| 4780 | rs4231336   | 17 | 10313376 | G | G | G | A | G | A |
| 4781 | rs6203320   | 17 | 10451573 | G | A | A | A | A | A |
| 4782 | rs3658207   | 17 | 10759832 | A | G | G | G | G | G |
| 4783 | rs3667406   | 17 | 10862445 | G | A | A | G | A | G |
| 4784 | rs6231166   | 17 | 10944029 | G | G | G | A | G | A |
| 4785 | rs3674166   | 17 | 11214621 | A | G | G | A | G | A |
| 4786 | mCV24458659 | 17 | 11892953 | G | G | G | A | G | A |
| 4787 | rs3662820   | 17 | 11723443 | G | A | A | G | A | G |
| 4788 | rs6244331   | 17 | 11740615 | G | G | G | G | G | G |
| 4789 | rs3089652   | 17 | 11896790 | T | T | T | T | T | T |
| 4790 | rs3674900   | 17 | 11922826 | G | A | A | A | A | A |
| 4791 | rs8262657   | 17 | 11992076 | G | G | G | G | G | G |
| 4792 | rs8262658   | 17 | 11992249 | G | G | G | G | G | G |
| 4793 | rs3693921   | 17 | 13105267 | A | A | G | A | A | A |
| 4794 | rs3654147   | 17 | 12371207 | A | A | A | G | A | G |
| 4795 | rs3723317   | 17 | 12406402 | A | A | C | C | A | C |
| 4796 | rs6164117   | 17 | 12806000 | A | A | A | A | A | A |
| 4797 | rs6183155   | 17 | 13037953 | G | G | G | G | G | G |
| 4798 | rs8256979   | 17 | 13563599 | A | A | A | A | A | A |
| 4799 | rs8256975   | 17 | 13563700 | A | A | A | A | A | A |
| 4800 | rs3661800   | 17 | 13635486 | A | A | A | G | A | G |
| 4801 | mCV24175979 | 17 | 15602752 | T | T | A | A | T | A |
| 4802 | rs3689478   | 17 | 13831303 | A | A | C | A | A | A |
| 4803 | rs3679431   | 17 | 13834888 | C | C | C | C | C | C |
| 4804 | rs3714781   | 17 | 14620427 | A | A | G | A | A | A |
| 4805 | rs6268777   | 17 | 14704985 | G | G | G | G | G | G |
| 4806 | rs6362683   | 17 | 14990375 | G | G | G | A | G | A |
| 4807 | rs3675740   | 17 | 15072904 | A | A | C | C | A | C |

|      |             |    |          |     |   |   |     |   |      |
|------|-------------|----|----------|-----|---|---|-----|---|------|
| 4808 | rs3726555   | 17 | 15215815 | G   | G | G | C   | G | G    |
| 4809 | rs6270865   | 17 | 15307109 | A   | A | G | A   | A | G    |
| 4810 | rs3667748   | 17 | 15457982 | G   | G | A | G   | G | A    |
| 4811 | mCV25045820 | 17 | 17611504 | A   | A | T | T   | A | T    |
| 4812 | rs3712728   | 17 | 16218065 | A   | A | G | G   | A | A    |
| 4813 | rs3719040   | 17 | 16221930 | G   | G | A | A   | G | A    |
| 4814 | rs3721884   | 17 | 16225206 | T   | T | A | T   | T | T    |
| 4815 | rs6284923   | 17 | 16415367 | A   | A | A | A   | A | A    |
| 4816 | rs6309226   | 17 | 16539988 | A   | A | C | A   | A | C    |
| 4817 | rs4137900   | 17 | 16816651 | T   | T | A | A   | T | A    |
| 4818 | rs6393324   | 17 | 16889400 | T   | T | T | T   | T | A    |
| 4819 | mCV23444673 | 17 | 19347416 | A   | A | A | T   | A | A    |
| 4820 | rs3672898   | 17 | 18097345 | C   | C | A | A   | C | C    |
| 4821 | rs3694284   | 17 | 18205555 | C   | C | A | A   | C | C    |
| 4822 | rs3671574   | 17 | 18221634 | A   | A | G | G   | A | A    |
| 4823 | rs3681769   | 17 | 18781372 | C   | C | A | A   | C | A    |
| 4824 | rs6341891   | 17 | 18893902 | A   | A | G | G   | A | G    |
| 4825 | rs3718510   | 17 | 19096830 | G   | G | A | A   | G | A    |
| 4826 | rs3667809   | 17 | 19252112 | G   | G | G | C   | G | G    |
| 4827 | rs8249644   | 17 | 19286471 | A   | A | C | C   | A | C    |
| 4828 | rs8239794   | 17 | 19287195 | C   | C | C | C   | C | NONE |
| 4829 | rs3721675   | 17 | 19585518 | G   | G | G | A   | G | G    |
| 4830 | rs6267457   | 17 | 19659545 | G   | G | A | A   | G | A    |
| 4831 | rs6185197   | 17 | 19950473 | A   | A | G | G   | A | G    |
| 4832 | mCV24338392 | 17 | 20884774 | A   | A | G | G   | A | G    |
| 4833 | rs3698221   | 17 | 20199210 | T   | T | A | A   | T | A    |
| 4834 | rs3656149   | 17 | 21251079 | G   | G | G | G   | G | G    |
| 4835 | rs3696835   | 17 | 21394398 | G   | G | G | A   | G | G    |
| 4836 | rs6157758   | 17 | 21402389 | A   | A | A | A   | A | A    |
| 4837 | rs6305613   | 17 | 21862091 | C   | C | C | C   | C | C    |
| 4838 | rs3716211   | 17 | 22140138 | G   | G | A | A   | G | A    |
| 4839 | rs4231354   | 17 | 22374967 | A   | A | A | G   | A | A    |
| 4840 | rs6200761   | 17 | 22576942 | A   | A | A | G   | A | A    |
| 4841 | rs3669897   | 17 | 22797612 | G   | G | G | G   | G | G    |
| 4842 | rs3703275   | 17 | 22926002 | A   | A | A | G   | A | A    |
| 4843 | rs3667411   | 17 | 22992899 | A   | A | A | G   | A | G    |
| 4844 | rs3702941   | 17 | 23154579 | G   | G | G | A   | G | G    |
| 4845 | rs6407067   | 17 | 23177667 | C   | C | C | A   | C | C    |
| 4846 | rs8252745   | 17 | 23225384 | T   | T | T | A   | T | T    |
| 4847 | rs8252750   | 17 | 23225612 | G   | G | G | C   | G | G    |
| 4848 | rs3659741   | 17 | 23448649 | C   | C | C | A   | C | C    |
| 4849 | rs3669072   | 17 | 23883938 | G   | G | G | A   | G | G    |
| 4850 | rs8256992   | 17 | 23968313 | G   | A | G | G   | A | G    |
| 4851 | rs3719497   | 17 | 24100880 | A   | A | A | G   | A | A    |
| 4852 | rs6337584   | 17 | 24422663 | A   | A | A | A   | A | A    |
| 4853 | rs6338671   | 17 | 24422825 | A/G | A | A | A/G | A | A    |
| 4854 | rs4136360   | 17 | 24771683 | A   | G | A | G   | G | G    |
| 4855 | rs3715840   | 17 | 24970207 | A   | G | A | G   | G | G    |
| 4856 | rs8252767   | 17 | 25094658 | G   | G | G | G   | G | G    |
| 4857 | rs8252768   | 17 | 25094812 | G   | G | G | G   | G | G    |
| 4858 | mCV22893552 | 17 | 27304687 | C   | G | G | C   | C | G    |
| 4859 | mCV25130928 | 17 | 27460257 | G   | A | A | G   | G | G    |
| 4860 | rs3089389   | 17 | 25404864 | A   | A | A | A   | A | A    |
| 4861 | mCV23823298 | 17 | 27856524 | G   | A | A | G   | G | A    |
| 4862 | mCV23823306 | 17 | 27856591 | A   | T | T | A   | A | T    |
| 4863 | mCV23823307 | 17 | 27856628 | A   | G | A | A   | A | G    |
| 4864 | mCV23823308 | 17 | 27856770 | G   | A | A | G   | G | G    |
| 4865 | mCV23823315 | 17 | 27856980 | G   | A | A | G   | G | A    |
| 4866 | mCV23823316 | 17 | 27857043 | C   | A | A | C   | C | C    |
| 4867 | mCV23823317 | 17 | 27857262 | A   | T | T | T   | A | T    |
| 4868 | mCV23823324 | 17 | 27857264 | G   | A | A | A   | G | A    |
| 4869 | mCV23823325 | 17 | 27858894 | G   | A | A | G   | G | A    |
| 4870 | mCV23823605 | 17 | 27860857 | A   | G | G | G   | A | G    |
| 4871 | mCV23823611 | 17 | 27860877 | A   | G | G | G   | A | G    |
| 4872 | mCV23823620 | 17 | 27861253 | A   | G | G | A   | A | G    |
| 4873 | mCV23823622 | 17 | 26809701 | G   | G | G | G   | G | G    |
| 4874 | mCV23823630 | 17 | 27865078 | A   | G | G | G   | A | G    |
| 4875 | mCV23823642 | 17 | 27865597 | G   | A | A | G   | G | A    |
| 4876 | mCV23823653 | 17 | 27866179 | G   | G | G | A   | G | G    |
| 4877 | mCV23823654 | 17 | 27866210 | G   | G | G | A   | G | G    |
| 4878 | mCV23823665 | 17 | 27868357 | G   | A | A | G   | G | G    |
| 4879 | mCV23823666 | 17 | 27868421 | A   | G | G | G   | A | G    |
| 4880 | mCV23823676 | 17 | 27868645 | G   | A | A | G   | G | A    |
| 4881 | mCV23823689 | 17 | 27869072 | C   | G | G | C   | C | G    |

|      |             |    |          |      |   |     |   |     |     |
|------|-------------|----|----------|------|---|-----|---|-----|-----|
| 4882 | mCV23823690 | 17 | 27869203 | G    | G | G   | C | G   | G   |
| 4883 | rs3656446   | 17 | 25935445 | A    | G | G   | G | G   | G   |
| 4884 | rs6397584   | 17 | 26039914 | A    | A | A   | C | A   | A   |
| 4885 | rs4231400   | 17 | 26168221 | A    | G | G   | G | G   | G   |
| 4886 | rs3695831   | 17 | 26357216 | A    | G | G   | G | G   | G   |
| 4887 | rs3723968   | 17 | 27393694 | G    | A | A   | G | G   | G   |
| 4888 | rs6384940   | 17 | 27649241 | G    | G | G   | A | G   | G   |
| 4889 | rs6308773   | 17 | 27783398 | A    | G | G   | A | A   | A   |
| 4890 | rs3670354   | 17 | 27841317 | A    | G | G   | G | A   | G   |
| 4891 | rs3693494   | 17 | 28381655 | A    | A | A   | G | A   | G   |
| 4892 | rs3672136   | 17 | 28602063 | C    | C | C   | G | C   | G   |
| 4893 | rs6264409   | 17 | 28659107 | A    | G | G   | A | A   | G   |
| 4894 | rs3704177   | 17 | 28705435 | G    | A | A   | G | G   | A   |
| 4895 | mCV27560398 | 17 | 30855613 | G    | A | A   | G | G   | G   |
| 4896 | rs8274804   | 17 | 29792700 | G    | G | G   | G | G   | G   |
| 4897 | rs6345886   | 17 | 29981285 | A    | C | C   | A | A   | A   |
| 4898 | mCV22813496 | 17 | 31101498 | C    | A | A   | C | C   | C   |
| 4899 | rs3684143   | 17 | 30349899 | A    | C | C   | A | A   | A   |
| 4900 | rs6242153   | 17 | 30531880 | C    | C | C   | A | C   | A   |
| 4901 | rs3685877   | 17 | 30535398 | A    | A | A   | G | A   | G   |
| 4902 | rs6303400   | 17 | 30991976 | A    | A | A   | A | A   | A   |
| 4903 | rs3705058   | 17 | 31635892 | A    | G | G   | A | A   | G   |
| 4904 | rs3672987   | 17 | 31726297 | A    | A | A   | T | A   | A   |
| 4905 | rs6249614   | 17 | 32051505 | A    | C | C   | A | A   | C   |
| 4906 | rs3724223   | 17 | 32068525 | A    | G | G   | A | G   | G   |
| 4907 | mCV22797750 | 17 | 32167323 | A    | G | G   | A | G   | G   |
| 4908 | rs8242408   | 17 | 32690515 | A    | A | A   | A | G   | G   |
| 4909 | rs3023452   | 17 | 32698941 | A    | G | G   | A | G   | G   |
| 4910 | rs3665150   | 17 | 32834309 | A    | C | C   | A | A   | A   |
| 4911 | mCV24833819 | 17 | 34280609 | C    | C | C   | C | G   | C   |
| 4912 | rs8239672   | 17 | 34295376 | A    | G | A   | A | G   | G   |
| 4913 | mCV22966449 | 17 | 33591420 | C    | A | A   | C | A   | A   |
| 4914 | rs6288208   | 17 | 34041728 | C    | C | C   | C | C   | C   |
| 4915 | mCV22965443 | 17 | 33636201 | A    | T | A   | A | T   | A   |
| 4916 | rs3682923   | 17 | 34343989 | A    | G | A   | G | G   | G   |
| 4917 | rs6169418   | 17 | 34483485 | G    | G | G   | G | G   | G   |
| 4918 | rs8247942   | 17 | 34700180 | G    | G | A   | A | A   | G   |
| 4919 | rs4139933   | 17 | 34723118 | NONE | G | G   | A | A   | G   |
| 4920 | rs6295184   | 17 | 34724657 | C    | A | A   | A | A/C | A   |
| 4921 | rs6277604   | 17 | 35019070 | C    | A | C   | A | A   | A   |
| 4922 | mCV24432701 | 17 | 36599216 | A    | G | A   | A | A   | G   |
| 4923 | rs6153283   | 17 | 35542332 | A    | A | A   | A | A   | A   |
| 4924 | rs8237882   | 17 | 35571818 | A    | A | G   | A | A   | A   |
| 4925 | rs8237880   | 17 | 35571992 | A    | A | A   | A | A   | A   |
| 4926 | rs3682901   | 17 | 35961628 | T    | T | A   | T | A   | A   |
| 4927 | rs6332461   | 17 | 36061319 | G    | A | A   | A | G   | G   |
| 4928 | mCV24438675 | 17 | 35662531 | A    | G | A   | A | G   | G   |
| 4929 | rs3145663   | 17 | 36354591 | A    | G | A   | G | A   | A   |
| 4930 | mCV25060370 | 17 | 36131025 | A    | A | C   | A | C   | A   |
| 4931 | rs6225551   | 17 | 36841633 | G    | G | G   | G | G   | G   |
| 4932 | mCV25067640 | 17 | 36721752 | G    | A | A   | A | A   | G   |
| 4933 | rs6390174   | 17 | 37542832 | A    | A | G   | A | G   | G   |
| 4934 | rs3721814   | 17 | 37878210 | C    | G | C   | G | C   | C   |
| 4935 | rs6370671   | 17 | 39267163 | T    | T | T   | T | T   | A/T |
| 4936 | rs3705623   | 17 | 38190965 | G    | A | G   | A | G   | G   |
| 4937 | mCV23089208 | 17 | 39835658 | C    | G | C/G | G | C/G | C/G |
| 4938 | rs8254221   | 17 | 38941850 | A    | C | C   | C | A   | A   |
| 4939 | mCV24450766 | 17 | 38306755 | G    | A | G   | A | G   | G   |
| 4940 | rs3702604   | 17 | 39103029 | G    | A | G   | A | A   | G   |
| 4941 | rs6295287   | 17 | 39267362 | A    | A | A   | T | T   | A   |
| 4942 | rs3655646   | 17 | 39358743 | G    | G | A   | G | G   | G   |
| 4943 | mCV25168292 | 17 | 41083128 | G    | A | A   | A | G   | G   |
| 4944 | rs6399116   | 17 | 39888389 | G    | G | G   | G | G   | G   |
| 4945 | rs4231483   | 17 | 40151966 | G    | G | G   | G | A   | G   |
| 4946 | rs3664698   | 17 | 40369398 | G    | G | G   | A | G   | G   |
| 4947 | rs3726572   | 17 | 40406153 | G    | G | G   | A | G   | G   |
| 4948 | rs6236638   | 17 | 40550397 | A    | A | A   | A | G   | A   |
| 4949 | rs6280628   | 17 | 40591253 | G    | G | G   | A | G   | G   |
| 4950 | mCV23717143 | 17 | 39623874 | A    | A | G   | G | A   | G   |
| 4951 | rs3090290   | 17 | 40804382 | G    | G | G   | G | G   | G   |
| 4952 | rs6208897   | 17 | 41383159 | T    | A | A   | T | T   | T   |
| 4953 | rs3709304   | 17 | 41572825 | G    | G | A   | A | G   | G   |
| 4954 | rs3656008   | 17 | 41777024 | A    | A | A   | G | A   | G   |
| 4955 | mCV25197172 | 17 | 41080900 | G    | G | G   | G | A   | G   |

|      |             |    |          |   |   |   |   |   |   |
|------|-------------|----|----------|---|---|---|---|---|---|
| 4956 | rs6278687   | 17 | 42194322 | A | G | G | G | G | A |
| 4957 | rs3711632   | 17 | 42239130 | A | G | G | A | G | A |
| 4958 | rs3677240   | 17 | 42314549 | A | A | A | G | A | A |
| 4959 | rs6184522   | 17 | 43119719 | A | A | A | G | G | A |
| 4960 | rs3668036   | 17 | 43844174 | G | G | A | G | G | G |
| 4961 | rs4231504   | 17 | 43855174 | A | A | A | A | A | A |
| 4962 | rs3658769   | 17 | 43857174 | C | C | A | C | C | C |
| 4963 | rs3718925   | 17 | 43917579 | A | A | A | G | A | A |
| 4964 | rs6356929   | 17 | 44139227 | G | G | G | G | G | G |
| 4965 | rs3705319   | 17 | 44743703 | A | G | G | G | G | G |
| 4966 | rs8261571   | 17 | 44885188 | G | G | G | G | G | G |
| 4967 | rs3090988   | 17 | 44913748 | A | A | A | A | A | A |
| 4968 | rs6413403   | 17 | 45006996 | A | A | A | A | A | A |
| 4969 | rs3657977   | 17 | 45526654 | A | G | G | G | G | G |
| 4970 | rs4231530   | 17 | 45985950 | A | A | A | A | A | A |
| 4971 | rs3715180   | 17 | 46031381 | G | A | A | G | A | A |
| 4972 | mCV22964525 | 17 | 45307498 | A | T | T | T | T | T |
| 4973 | rs3705130   | 17 | 46933263 | C | C | C | A | C | C |
| 4974 | rs4137228   | 17 | 46933322 | G | G | G | A | G | G |
| 4975 | rs3706340   | 17 | 46933503 | T | T | T | A | T | T |
| 4976 | rs3709891   | 17 | 47141909 | G | G | G | A | G | A |
| 4977 | rs6314185   | 17 | 47439648 | G | A | A | A | A | G |
| 4978 | rs3690039   | 17 | 47611360 | A | A | A | C | A | C |
| 4979 | rs3678696   | 17 | 48018457 | G | A | A | G | A | A |
| 4980 | mCV27587738 | 17 | 47274186 | A | T | T | A | T | T |
| 4981 | rs3712953   | 17 | 48442632 | G | G | G | A | G | G |
| 4982 | rs3682797   | 17 | 48503978 | G | A | A | G | A | G |
| 4983 | rs6352244   | 17 | 48760688 | C | G | G | C | G | G |
| 4984 | rs3716288   | 17 | 48939275 | C | C | C | A | C | A |
| 4985 | rs6395919   | 17 | 49474335 | C | C | C | G | C | C |
| 4986 | rs6193898   | 17 | 49947879 | G | G | G | A | G | A |
| 4987 | rs6191282   | 17 | 50245177 | A | A | A | G | A | G |
| 4988 | rs3678447   | 17 | 50312700 | G | G | G | A | G | G |
| 4989 | rs3703891   | 17 | 50566379 | A | G | G | A | G | A |
| 4990 | rs3700227   | 17 | 50793087 | G | G | G | A | G | A |
| 4991 | rs6247950   | 17 | 51008551 | T | T | T | T | T | T |
| 4992 | mCV23762311 | 17 | 50479183 | G | A | A | G | A | G |
| 4993 | rs6272475   | 17 | 51663908 | A | A | A | G | A | A |
| 4994 | rs3701810   | 17 | 51849685 | A | A | A | T | A | A |
| 4995 | rs3671369   | 17 | 51861608 | A | A | A | G | A | A |
| 4996 | rs8273948   | 17 | 52018568 | A | A | A | A | A | A |
| 4997 | rs8273969   | 17 | 52020910 | G | G | G | C | G | G |
| 4998 | rs4138162   | 17 | 52036347 | G | G | G | A | G | G |
| 4999 | rs8258060   | 17 | 52248879 | C | C | C | C | C | C |
| 5000 | rs8258074   | 17 | 52251943 | A | A | A | A | A | A |
| 5001 | rs8258045   | 17 | 52259159 | A | A | A | A | A | A |
| 5002 | rs6241282   | 17 | 52370790 | A | A | A | G | A | A |
| 5003 | rs3665187   | 17 | 52576752 | G | G | G | A | G | G |
| 5004 | rs3667784   | 17 | 52602580 | T | A | A | T | A | T |
| 5005 | rs3726913   | 17 | 52765739 | A | A | A | G | A | A |
| 5006 | rs6403494   | 17 | 53111449 | A | A | A | G | A | A |
| 5007 | rs6188603   | 17 | 53391442 | G | A | A | G | A | G |
| 5008 | rs3725839   | 17 | 53413175 | A | C | C | A | C | A |
| 5009 | rs3667909   | 17 | 53413482 | A | G | G | A | G | A |
| 5010 | rs3714226   | 17 | 53552802 | C | C | C | A | C | C |
| 5011 | rs3714819   | 17 | 53634527 | C | C | C | A | C | C |
| 5012 | rs3023455   | 17 | 53720340 | G | G | G | A | G | G |
| 5013 | rs3705741   | 17 | 53745193 | A | A | A | G | A | A |
| 5014 | rs6376589   | 17 | 53760239 | G | G | G | G | G | G |
| 5015 | rs3709414   | 17 | 53973279 | A | A | A | C | A | A |
| 5016 | rs3663425   | 17 | 53978315 | A | A | A | G | A | A |
| 5017 | mCV23775834 | 17 | 53723343 | C | C | C | G | C | C |
| 5018 | rs6304244   | 17 | 54320104 | T | T | T | T | T | T |
| 5019 | rs6356535   | 17 | 54362877 | G | G | G | G | G | G |
| 5020 | mCV25255424 | 17 | 53911709 | A | G | G | G | G | A |
| 5021 | rs3714078   | 17 | 54652919 | G | G | G | G | G | G |
| 5022 | rs6334729   | 17 | 54734199 | C | C | C | C | C | C |
| 5023 | rs3090279   | 17 | 55307700 | G | G | G | G | G | G |
| 5024 | rs3712800   | 17 | 55343894 | A | G | G | G | G | A |
| 5025 | rs4231565   | 17 | 55565601 | C | C | C | C | C | C |
| 5026 | rs4231576   | 17 | 55773312 | C | C | C | C | C | C |
| 5027 | rs3023458   | 17 | 55806612 | G | G | G | G | G | G |
| 5028 | rs3703241   | 17 | 55958582 | G | A | A | A | A | A |
| 5029 | rs2020693   | 17 | 58224766 | A | A | A | A | A | A |

|      |             |    |          |   |   |   |   |   |     |
|------|-------------|----|----------|---|---|---|---|---|-----|
| 5030 | rs6326012   | 17 | 56684844 | A | A | A | A | A | A   |
| 5031 | rs6397556   | 17 | 56695485 | G | G | G | G | G | G   |
| 5032 | rs3683834   | 17 | 56902266 | A | T | T | T | T | T   |
| 5033 | rs3715723   | 17 | 56999568 | A | C | C | C | C | C   |
| 5034 | rs4231577   | 17 | 57211029 | G | A | A | A | A | A   |
| 5035 | rs6245412   | 17 | 57237249 | G | A | A | A | A | A   |
| 5036 | mCV24362398 | 17 | 56083454 | A | C | C | C | C | C   |
| 5037 | rs6240557   | 17 | 58029831 | A | A | A | A | A | A   |
| 5038 | rs3089429   | 17 | 58508327 | T | T | T | T | T | T   |
| 5039 | rs6294080   | 17 | 59028096 | G | G | G | G | G | G   |
| 5040 | mCV23050965 | 17 | 57718414 | C | C | C | C | G | C   |
| 5041 | rs6251286   | 17 | 59203757 | C | C | A | C | C | C   |
| 5042 | rs6153567   | 17 | 59689409 | A | A | A | A | A | A   |
| 5043 | rs6180905   | 17 | 60268365 | G | G | G | G | G | G   |
| 5044 | rs6284634   | 17 | 60829031 | A | A | A | A | A | A   |
| 5045 | rs3688465   | 17 | 61144882 | A | G | A | G | G | G   |
| 5046 | rs4231581   | 17 | 61406487 | G | G | G | G | G | G   |
| 5047 | rs4231582   | 17 | 61406523 | A | A | A | A | A | A   |
| 5048 | rs3707749   | 17 | 61447544 | A | G | A | G | G | G   |
| 5049 | rs3725261   | 17 | 61514860 | G | A | A | A | A | A   |
| 5050 | rs3090162   | 17 | 61730499 | G | G | G | G | G | G   |
| 5051 | rs6402097   | 17 | 62066360 | A | A | A | A | G | A   |
| 5052 | rs6270149   | 17 | 62382711 | C | C | C | C | C | C   |
| 5053 | rs4231584   | 17 | 62494626 | A | A | A | A | A | A   |
| 5054 | rs3091109   | 17 | 63107197 | G | G | A | G | G | G   |
| 5055 | mCV22888090 | 17 | 61947366 | A | A | A | A | G | A   |
| 5056 | rs3719337   | 17 | 63706139 | A | A | A | A | G | G   |
| 5057 | mCV23053625 | 17 | 62696390 | A | A | A | A | A | A   |
| 5058 | rs4231587   | 17 | 64013697 | A | A | A | A | A | A   |
| 5059 | rs6367822   | 17 | 64143579 | A | G | A | A | G | G   |
| 5060 | rs3657113   | 17 | 64190941 | A | G | A | A | G | G   |
| 5061 | rs3090284   | 17 | 64250223 | G | G | G | G | G | A/G |
| 5062 | rs6185805   | 17 | 64731493 | C | C | C | A | C | C   |
| 5063 | mCV23056184 | 17 | 63809601 | G | G | G | G | A | A   |
| 5064 | rs3708432   | 17 | 64967478 | G | G | G | A | G | G   |
| 5065 | rs3671056   | 17 | 65089724 | G | G | G | A | G | G   |
| 5066 | rs6249763   | 17 | 65207648 | G | G | G | A | G | G   |
| 5067 | rs4231594   | 17 | 65303321 | G | G | G | G | G | G   |
| 5068 | rs3089454   | 17 | 65333279 | G | G | G | G | G | G   |
| 5069 | rs3684212   | 17 | 65520346 | A | A | A | G | A | A   |
| 5070 | rs3685911   | 17 | 65536624 | A | A | A | T | A | A   |
| 5071 | rs3089550   | 17 | 65711637 | A | A | A | A | A | A   |
| 5072 | rs6315445   | 17 | 65716653 | A | A | A | G | A | A   |
| 5073 | rs6382997   | 17 | 65726542 | G | G | G | A | G | G   |
| 5074 | rs3727008   | 17 | 66156395 | A | A | A | G | G | A   |
| 5075 | rs4231612   | 17 | 66245021 | A | A | A | A | A | A   |
| 5076 | rs4231615   | 17 | 66265661 | A | A | A | A | C | C   |
| 5077 | rs3709922   | 17 | 66470109 | G | A | G | A | A | A   |
| 5078 | rs3666819   | 17 | 66496973 | A | A | A | G | A | A   |
| 5079 | rs3682341   | 17 | 66503793 | A | G | G | G | G | G   |
| 5080 | rs6399089   | 17 | 66558479 | G | G | A | G | A | A   |
| 5081 | rs3724918   | 17 | 66653148 | A | C | A | A | A | A   |
| 5082 | rs6239923   | 17 | 67144876 | A | A | A | A | A | A   |
| 5083 | rs3699986   | 17 | 67179467 | A | C | C | C | C | C   |
| 5084 | rs3690010   | 17 | 67406403 | A | C | C | A | C | C   |
| 5085 | rs3657117   | 17 | 67483047 | G | G | G | A | G | G   |
| 5086 | rs6192583   | 17 | 68204399 | A | A | A | A | A | A   |
| 5087 | rs6302685   | 17 | 68453937 | A | C | C | C | C | C   |
| 5088 | rs3701107   | 17 | 68677840 | T | A | A | T | A | T   |
| 5089 | rs3660112   | 17 | 69021924 | A | A | A | C | A | C   |
| 5090 | rs4231624   | 17 | 69402497 | G | G | G | G | G | G   |
| 5091 | rs3717152   | 17 | 69491587 | A | A | A | G | A | G   |
| 5092 | rs3681971   | 17 | 69533244 | A | A | A | G | A | G   |
| 5093 | rs6257479   | 17 | 69639007 | G | G | G | A | G | G   |
| 5094 | mCV24388347 | 17 | 68812821 | G | A | A | G | A | G   |
| 5095 | rs3675634   | 17 | 69670995 | A | A | A | G | A | A   |
| 5096 | rs3693863   | 17 | 69678219 | G | G | G | A | G | G   |
| 5097 | rs6155172   | 17 | 70085854 | A | A | A | G | A | A   |
| 5098 | rs3654545   | 17 | 70526219 | G | A | G | G | G | G   |
| 5099 | rs6322076   | 17 | 70683789 | G | A | G | A | G | G   |
| 5100 | rs3680857   | 17 | 70764446 | A | A | A | G | A | A   |
| 5101 | rs3691628   | 17 | 70833240 | A | A | A | G | A | A   |
| 5102 | rs6263744   | 17 | 70929484 | G | G | A | A | A | A   |
| 5103 | rs6284907   | 17 | 71119789 | G | A | G | A | G | G   |

|      |             |    |          |      |   |   |   |   |   |
|------|-------------|----|----------|------|---|---|---|---|---|
| 5104 | rs4137129   | 17 | 71346669 | G    | G | G | A | G | G |
| 5105 | rs3706023   | 17 | 71493414 | A    | A | G | A | G | G |
| 5106 | rs4231637   | 17 | 71682600 | G    | G | G | G | G | G |
| 5107 | rs3719059   | 17 | 72131923 | A    | A | G | A | G | G |
| 5108 | rs6280326   | 17 | 72223894 | G    | G | A | A | A | A |
| 5109 | rs3089431   | 17 | 72225083 | C    | C | C | C | C | C |
| 5110 | rs3697418   | 17 | 72277773 | A    | A | A | G | A | A |
| 5111 | rs4136071   | 17 | 72713849 | A    | A | A | G | A | A |
| 5112 | rs4231653   | 17 | 72763263 | A    | A | A | A | A | A |
| 5113 | rs4231654   | 17 | 72763355 | G    | G | G | G | G | G |
| 5114 | rs6372166   | 17 | 72807022 | G    | G | G | A | G | G |
| 5115 | rs3676739   | 17 | 73452746 | G    | G | G | A | G | A |
| 5116 | rs4137733   | 17 | 73566504 | A    | T | T | T | T | T |
| 5117 | rs6229946   | 17 | 73658199 | A    | A | A | C | A | C |
| 5118 | rs3704554   | 17 | 73659610 | G    | G | G | A | G | A |
| 5119 | rs3710559   | 17 | 73742289 | C    | G | G | C | G | C |
| 5120 | rs3710803   | 17 | 74186168 | A    | A | A | G | A | G |
| 5121 | rs3694520   | 17 | 74380752 | C    | A | A | C | A | C |
| 5122 | rs3664306   | 17 | 74555767 | C    | C | C | C | C | C |
| 5123 | rs3656948   | 17 | 74942842 | C    | C | C | A | C | A |
| 5124 | rs6278585   | 17 | 75294848 | C    | A | A | C | A | C |
| 5125 | mCV24431619 | 17 | 74706211 | A    | C | C | C | C | C |
| 5126 | rs3717212   | 17 | 75421714 | G    | G | A | G | A | G |
| 5127 | rs3663088   | 17 | 75526825 | G    | G | G | A | G | A |
| 5128 | rs6267152   | 17 | 75753976 | T    | T | A | T | A | T |
| 5129 | rs6390351   | 17 | 76024538 | G    | G | A | G | A | G |
| 5130 | rs3699947   | 17 | 76352887 | A    | A | G | A | G | A |
| 5131 | rs6386440   | 17 | 76897964 | A    | G | A | G | A | A |
| 5132 | rs3685368   | 17 | 76901195 | A    | G | G | G | G | A |
| 5133 | rs3663966   | 17 | 77250063 | G    | G | A | A | A | G |
| 5134 | rs4231668   | 17 | 77405947 | C    | C | C | C | C | C |
| 5135 | rs8237851   | 17 | 77433287 | A    | A | A | A | A | A |
| 5136 | rs4231669   | 17 | 77435608 | A    | A | A | A | A | A |
| 5137 | rs3718983   | 17 | 77832707 | G    | G | G | A | G | G |
| 5138 | rs3692379   | 17 | 77906290 | T    | A | T | A | T | T |
| 5139 | rs3670607   | 17 | 77914489 | A    | A | A | G | A | A |
| 5140 | rs3674040   | 17 | 78030057 | A    | A | A | G | A | A |
| 5141 | rs8255877   | 17 | 78249305 | G    | G | G | G | G | G |
| 5142 | rs8253071   | 17 | 78253474 | G    | G | G | G | G | G |
| 5143 | mCV23092135 | 17 | 80479240 | A    | A | A | G | A | A |
| 5144 | rs4231674   | 17 | 78577995 | A    | A | A | A | A | A |
| 5145 | rs6371065   | 17 | 78627417 | A    | C | A | A | A | A |
| 5146 | rs4231679   | 17 | 78951087 | G    | G | G | G | G | G |
| 5147 | rs6305051   | 17 | 79153888 | G    | A | G | G | G | G |
| 5148 | mCV22762284 | 17 | 78731080 | G    | A | G | G | G | G |
| 5149 | rs6181774   | 17 | 79837307 | A    | A | G | A | G | A |
| 5150 | rs3686767   | 17 | 79930775 | A    | A | T | A | T | A |
| 5151 | rs3711010   | 17 | 80048342 | A    | C | C | C | C | C |
| 5152 | rs4231698   | 17 | 80070788 | NONE | G | G | G | G | G |
| 5153 | mCV23534950 | 17 | 80188236 | A    | G | G | G | A | G |
| 5154 | rs6154895   | 17 | 81025139 | A    | A | A | A | A | A |
| 5155 | rs6276365   | 17 | 81421811 | A    | A | A | A | G | A |
| 5156 | rs3684732   | 17 | 81575999 | G    | G | G | A | A | G |
| 5157 | rs3685398   | 17 | 81576122 | C    | C | C | A | A | C |
| 5158 | rs3664004   | 17 | 81789955 | G    | G | G | A | G | G |
| 5159 | rs6263123   | 17 | 81971402 | G    | G | G | A | G | G |
| 5160 | rs3662869   | 17 | 82041104 | A    | A | A | G | A | A |
| 5161 | rs3706971   | 17 | 82357907 | A    | A | A | C | C | C |
| 5162 | rs3701338   | 17 | 82579890 | G    | G | G | A | G | A |
| 5163 | mCV22838407 | 17 | 82364401 | G    | G | G | A | G | G |
| 5164 | rs3694880   | 17 | 83063710 | G    | G | G | A | A | A |
| 5165 | rs6361015   | 17 | 83316881 | A    | A | A | G | A | A |
| 5166 | rs6370900   | 17 | 83747260 | T    | T | T | T | T | T |
| 5167 | mCV25276476 | 17 | 83163111 | A    | A | A | A | G | A |
| 5168 | rs4137718   | 17 | 84047966 | T    | T | T | A | A | A |
| 5169 | rs4138686   | 17 | 84053123 | C    | C | C | A | A | A |
| 5170 | rs3686841   | 17 | 84357971 | G    | A | A | A | A | A |
| 5171 | rs3090281   | 17 | 84579122 | G    | G | G | G | G | G |
| 5172 | rs3669120   | 17 | 84773276 | A    | G | G | A | A | G |
| 5173 | mCV23125224 | 17 | 84283431 | A    | G | G | A | A | A |
| 5174 | rs6208887   | 17 | 84977157 | A    | G | G | A | A | A |
| 5175 | rs6336971   | 17 | 85333402 | G    | G | G | A | G | G |
| 5176 | rs4231720   | 17 | 85385338 | G    | G | G | A | G | G |
| 5177 | rs4231719   | 17 | 85385360 | T    | T | T | T | T | T |

|      |             |    |          |      |     |   |     |      |   |
|------|-------------|----|----------|------|-----|---|-----|------|---|
| 5178 | rs3660113   | 17 | 85503975 | G    | A   | A | A   | A    | A |
| 5179 | rs4223253   | 17 | 85676456 | G    | A   | A | G   | A    | A |
| 5180 | rs3689581   | 17 | 85678884 | G    | G   | G | A   | G    | G |
| 5181 | mCV23317493 | 17 | 85098239 | G    | A   | A | G   | G    | G |
| 5182 | rs6371637   | 17 | 85983636 | G    | G   | G | G   | G    | G |
| 5183 | rs3660792   | 17 | 86096117 | G    | G   | G | A   | A    | G |
| 5184 | rs3687741   | 17 | 86184391 | G    | A   | A | G   | G    | A |
| 5185 | rs3675790   | 17 | 86210258 | A    | A   | A | C   | C    | A |
| 5186 | rs3717375   | 17 | 86271144 | A    | G   | G | G   | G    | A |
| 5187 | rs3717026   | 17 | 86332237 | G    | G   | G | A   | A    | A |
| 5188 | rs3670275   | 17 | 87124699 | G    | G   | G | A   | A    | A |
| 5189 | rs3723150   | 17 | 87166427 | A    | A   | A | C   | C    | C |
| 5190 | rs3698948   | 17 | 87392863 | G    | G   | G | A   | A    | A |
| 5191 | rs8252727   | 17 | 87407573 | G    | G   | G | G   | G    | G |
| 5192 | rs3667644   | 17 | 88110557 | A    | C   | C | A   | C    | C |
| 5193 | rs6244553   | 17 | 88134897 | A    | G   | G | A   | G    | G |
| 5194 | rs3667051   | 17 | 88400292 | A    | A   | A | C   | A    | C |
| 5195 | rs3720344   | 17 | 88667431 | A    | A   | A | G   | A    | G |
| 5196 | rs6350864   | 17 | 88769457 | A    | A   | A | A   | A    | A |
| 5197 | rs3705332   | 17 | 88886608 | A    | A   | A | G   | A    | G |
| 5198 | rs3696168   | 17 | 89038700 | A    | A   | A | G   | A    | A |
| 5199 | rs3711990   | 17 | 89063089 | T    | T   | T | A   | T    | T |
| 5200 | rs6313030   | 17 | 89173825 | A    | A   | A | C   | A    | A |
| 5201 | rs3662979   | 17 | 89783795 | A    | A   | A | A   | G    | A |
| 5202 | rs6288047   | 17 | 90215134 | G    | G   | G | A   | G    | G |
| 5203 | mCV23152636 | 17 | 89655809 | A    | A   | C | C   | C    | C |
| 5204 | rs3711932   | 17 | 90340545 | A    | A   | A | T   | A    | T |
| 5205 | rs3664022   | 17 | 90675374 | G    | G   | A | A   | A    | A |
| 5206 | rs3709838   | 17 | 90801357 | A    | A   | A | A   | G    | A |
| 5207 | rs6294119   | 17 | 90832316 | C    | C   | C | C   | C    | C |
| 5208 | mCV23156879 | 17 | 90555098 | G    | G   | A | A   | A    | A |
| 5209 | rs3710808   | 17 | 91771218 | C    | A   | C | A   | C    | C |
| 5210 | rs6397044   | 17 | 91938734 | NONE | A   | G | A   | NONE | G |
| 5211 | rs3716639   | 17 | 92056452 | G    | G   | A | G   | A    | G |
| 5212 | rs6281710   | 17 | 92187851 | G    | G   | A | G   | A    | G |
| 5213 | rs3707114   | 17 | 92757308 | A    | A/G | G | A/G | A/G  | A |
| 5214 | rs3706382   | 17 | 92912930 | A    | A   | T | A   | T    | A |
| 5215 | rs6391399   | 17 | 93099132 | G    | G   | G | G   | G    | G |
| 5216 | rs6336001   | 17 | 93239347 | G    | G   | G | G   | G    | G |
| 5217 | mCV23172085 | 17 | 93491059 | A    | A   | A | A   | G    | A |
| 5218 | rs3696933   | 18 | 33968545 | G    | A   | A | G   | A    | G |
| 5219 | rs3664772   | 18 | 6221939  | A    | G   | A | G   | G    | G |
| 5220 | rs3671490   | 18 | 13787472 | G    | G   | A | A   | A    | A |
| 5221 | rs4231891   | 18 | 61107753 | C    | C   | C | C   | C    | C |
| 5222 | rs6339254   | 18 | 35140804 | A    | T   | A | A   | T    | A |
| 5223 | rs3702013   | 18 | 26999816 | A    | A   | G | A   | A    | A |
| 5224 | rs6404726   | 18 | 3460447  | A    | A   | A | A   | A    | A |
| 5225 | rs6332628   | 18 | 4229952  | A    | A   | A | A   | A    | A |
| 5226 | rs6394685   | 18 | 5198761  | A    | A   | A | A   | A    | A |
| 5227 | rs3676326   | 18 | 5284178  | G    | A   | A | A   | A    | A |
| 5228 | rs8254978   | 18 | 5975902  | C    | C   | C | C   | C    | C |
| 5229 | rs8254981   | 18 | 6083214  | G    | G   | G | G   | G    | G |
| 5230 | rs3660995   | 18 | 5993681  | A    | C   | A | C   | C    | C |
| 5231 | rs3662231   | 18 | 5993948  | A    | G   | A | G   | G    | G |
| 5232 | rs6291709   | 18 | 6319442  | T    | T   | T | T   | T    | T |
| 5233 | rs3680906   | 18 | 6890748  | A    | G   | A | G   | G    | G |
| 5234 | rs3689829   | 18 | 7051562  | G    | A   | A | A   | A    | A |
| 5235 | rs3712830   | 18 | 7053066  | G    | G   | C | G   | G    | G |
| 5236 | rs6256578   | 18 | 7351610  | A    | A   | A | A   | A    | A |
| 5237 | rs3715093   | 18 | 7352159  | A    | G   | G | G   | G    | G |
| 5238 | rs3680668   | 18 | 7403115  | G    | G   | A | G   | G    | G |
| 5239 | rs3656221   | 18 | 7651270  | G    | G   | A | G   | G    | G |
| 5240 | rs6160421   | 18 | 8089618  | A    | A   | A | A   | A    | A |
| 5241 | rs3689558   | 18 | 8254573  | G    | G   | A | G   | G    | G |
| 5242 | mCV24391893 | 18 | 11809427 | C    | G   | G | C   | G    | G |
| 5243 | rs3671937   | 18 | 8662226  | A    | T   | T | T   | T    | T |
| 5244 | rs3722941   | 18 | 9074049  | G    | A   | A | A   | A    | A |
| 5245 | rs6200782   | 18 | 9086189  | C    | G   | G | G   | G    | G |
| 5246 | rs3670421   | 18 | 9343756  | G    | G   | A | G   | G    | G |
| 5247 | rs3660245   | 18 | 9491813  | T    | T   | T | A   | A    | A |
| 5248 | rs3683349   | 18 | 9493278  | A    | A   | A | C   | C    | C |
| 5249 | rs2020500   | 18 | 10066074 | C    | C   | C | C   | C    | C |
| 5250 | rs3723041   | 18 | 10039176 | G    | G   | G | A   | A    | A |
| 5251 | rs3668888   | 18 | 9942350  | G    | A   | A | A   | A    | A |

|      |             |    |          |   |   |   |   |   |   |
|------|-------------|----|----------|---|---|---|---|---|---|
| 5252 | rs3686464   | 18 | 9846952  | A | A | A | T | T | T |
| 5253 | mCV23615070 | 18 | 13355068 | G | A | A | A | A | A |
| 5254 | rs6402963   | 18 | 10256623 | G | A | A | A | A | A |
| 5255 | rs3670316   | 18 | 11135762 | C | A | A | A | A | A |
| 5256 | rs4231742   | 18 | 11306822 | A | G | G | A | G | G |
| 5257 | rs4231739   | 18 | 11307003 | G | G | G | G | G | G |
| 5258 | rs3653699   | 18 | 11450421 | G | A | A | A | A | A |
| 5259 | rs6377403   | 18 | 11592854 | G | G | G | A | G | G |
| 5260 | mCV23617245 | 18 | 14895705 | G | G | G | A | A | G |
| 5261 | rs3663413   | 18 | 11996302 | A | A | G | A | A | A |
| 5262 | rs3710602   | 18 | 12172015 | G | G | G | A | A | G |
| 5263 | rs3711709   | 18 | 12221563 | G | A | A | G | G | A |
| 5264 | rs3664343   | 18 | 12296552 | A | A | G | A | A | A |
| 5265 | rs8255002   | 18 | 12575921 | G | A | A | A | A | G |
| 5266 | rs3667418   | 18 | 12966886 | A | G | G | G | G | G |
| 5267 | rs6194396   | 18 | 13581902 | A | A | A | G | G | A |
| 5268 | rs6237628   | 18 | 13602724 | G | G | G | A | A | G |
| 5269 | rs3682653   | 18 | 13678415 | G | G | G | A | A | G |
| 5270 | rs3716257   | 18 | 13701374 | A | A | A | G | G | A |
| 5271 | mCV23641317 | 1  | 42422145 | A | A | A | G | A | A |
| 5272 | rs6303028   | 18 | 14055191 | G | G | G | A | A | G |
| 5273 | rs6287645   | 18 | 14369611 | G | G | A | A | A | A |
| 5274 | rs6317011   | 18 | 15094289 | G | G | A | A | A | A |
| 5275 | rs3658805   | 18 | 15096200 | G | G | G | A | A | A |
| 5276 | rs3683582   | 18 | 15124363 | A | A | A | G | G | G |
| 5277 | rs6361186   | 18 | 15373312 | G | G | G | A | A | A |
| 5278 | rs6361663   | 18 | 15373357 | A | A | A | G | G | G |
| 5279 | rs3678446   | 18 | 15490522 | A | A | A | G | G | G |
| 5280 | rs3688865   | 18 | 15493663 | A | A | A | G | G | G |
| 5281 | rs3679437   | 18 | 15727143 | A | A | C | C | C | C |
| 5282 | rs8256206   | 18 | 15764118 | G | G | G | G | G | G |
| 5283 | rs6243077   | 18 | 16213979 | A | A | A | A | A | G |
| 5284 | rs6244740   | 18 | 16214281 | G | G | G | G | G | G |
| 5285 | rs3674389   | 18 | 16295547 | A | A | G | G | G | A |
| 5286 | rs3724798   | 18 | 17144490 | G | A | A | A | G | A |
| 5287 | rs6364856   | 18 | 17709970 | G | A | A | A | G | A |
| 5288 | rs3090636   | 18 | 17772608 | C | C | C | C | A | C |
| 5289 | rs3701343   | 18 | 18238507 | G | A | A | A | G | G |
| 5290 | rs6403230   | 18 | 18735996 | T | A | A | A | T | T |
| 5291 | rs3679802   | 18 | 19099880 | A | G | G | G | A | A |
| 5292 | mCV23670826 | 18 | 21882551 | A | C | A | A | C | C |
| 5293 | rs3656185   | 18 | 19941646 | A | G | G | G | A | G |
| 5294 | rs6303064   | 18 | 19992554 | C | A | A | A | C | C |
| 5295 | rs6305298   | 18 | 20914551 | G | A | A | A | G | G |
| 5296 | mCV23675970 | 18 | 20775526 | C | A | A | A | C | C |
| 5297 | rs6265202   | 18 | 21181978 | A | G | G | G | G | G |
| 5298 | rs3697673   | 18 | 21185318 | G | C | C | C | C | C |
| 5299 | rs6405412   | 18 | 21235290 | A | G | G | G | A | A |
| 5300 | rs8255015   | 18 | 21473215 | G | G | G | G | G | G |
| 5301 | rs4231757   | 18 | 21530950 | G | G | G | G | A | A |
| 5302 | rs4231751   | 18 | 21531284 | G | G | G | G | G | G |
| 5303 | rs4231759   | 18 | 21579938 | A | A | A | A | A | A |
| 5304 | rs3695261   | 18 | 22135899 | G | G | A | A | G | G |
| 5305 | rs3685375   | 18 | 22277575 | A | A | G | G | A | A |
| 5306 | rs3680100   | 18 | 22328434 | G | G | A | A | G | G |
| 5307 | rs3707236   | 18 | 22349475 | G | G | A | A | G | G |
| 5308 | rs6323016   | 18 | 22400485 | C | C | C | C | C | C |
| 5309 | rs3676826   | 18 | 22482188 | A | A | T | T | A | A |
| 5310 | rs4138020   | 18 | 23001325 | A | A | G | G | A | A |
| 5311 | rs6368237   | 18 | 23859205 | A | G | G | G | A | A |
| 5312 | rs3662301   | 18 | 23916457 | A | T | T | T | A | A |
| 5313 | rs3675490   | 18 | 23989819 | G | A | A | A | G | G |
| 5314 | rs6365146   | 18 | 24192499 | A | G | G | G | A | A |
| 5315 | rs4231762   | 18 | 24310967 | A | A | A | A | A | A |
| 5316 | rs4231764   | 18 | 24382152 | C | C | C | C | C | C |
| 5317 | rs3705122   | 18 | 24382288 | C | A | A | C | C | C |
| 5318 | rs4231768   | 18 | 24997791 | G | G | G | G | G | G |
| 5319 | rs3660676   | 18 | 25278262 | G | A | A | G | A | G |
| 5320 | rs6167189   | 18 | 25303642 | A | G | G | A | G | A |
| 5321 | rs3662641   | 18 | 25906081 | C | A | A | A | A | C |
| 5322 | rs6229632   | 18 | 26750311 | A | A | A | A | A | A |
| 5323 | rs3683414   | 18 | 26795949 | C | A | C | A | A | A |
| 5324 | rs3675291   | 18 | 26809188 | G | A | G | A | A | A |
| 5325 | rs6399698   | 18 | 27079169 | A | A | A | A | A | A |



|      |             |    |          |   |   |   |   |      |   |
|------|-------------|----|----------|---|---|---|---|------|---|
| 5326 | rs3090648   | 18 | 27469928 | A | A | A | A | A    | A |
| 5327 | rs2020544   | 18 | 28013006 | A | A | A | A | A    | A |
| 5328 | rs6161430   | 18 | 28109893 | T | T | T | T | T    | T |
| 5329 | rs6192656   | 18 | 28124261 | G | G | G | G | G    | G |
| 5330 | rs3671174   | 18 | 28539857 | G | G | A | G | G    | G |
| 5331 | rs3090850   | 18 | 28598270 | A | A | C | A | A    | A |
| 5332 | rs6402448   | 18 | 29169579 | T | T | A | T | T    | T |
| 5333 | rs3705063   | 18 | 29194269 | A | A | C | A | A    | A |
| 5334 | rs2020689   | 18 | 29303686 | G | G | G | G | G    | G |
| 5335 | rs3691362   | 18 | 30053090 | C | C | A | C | C    | A |
| 5336 | rs3090310   | 18 | 30195729 | A | A | A | A | A    | A |
| 5337 | rs3714233   | 18 | 30247058 | A | A | G | A | A    | G |
| 5338 | rs3023463   | 18 | 30249388 | A | A | C | A | A    | C |
| 5339 | rs6251727   | 18 | 30427721 | G | A | A | A | A    | G |
| 5340 | rs3723947   | 18 | 30885788 | C | C | C | G | C    | C |
| 5341 | rs3669742   | 18 | 30886721 | A | G | A | G | G    | G |
| 5342 | rs4228543   | 18 | 30943450 | C | C | C | C | C    | C |
| 5343 | rs3683699   | 18 | 30952210 | A | G | A | G | G    | G |
| 5344 | rs3693221   | 18 | 31215364 | A | A | A | G | A    | A |
| 5345 | rs6286913   | 18 | 31266611 | G | A | A | A | A    | A |
| 5346 | rs3672229   | 18 | 31390432 | G | A | G | A | A    | G |
| 5347 | rs3722973   | 18 | 31395543 | A | G | A | G | G    | A |
| 5348 | rs6340427   | 18 | 31500431 | A | G | A | G | G    | G |
| 5349 | rs6174809   | 18 | 31629539 | G | A | A | A | A    | A |
| 5350 | rs3666799   | 18 | 32344759 | A | C | C | A | C    | C |
| 5351 | rs3694865   | 18 | 32413054 | A | A | G | A | A    | G |
| 5352 | rs8269848   | 18 | 32591012 | C | C | C | C | C    | C |
| 5353 | rs6385006   | 18 | 32986999 | A | A | G | A | A    | A |
| 5354 | rs2228920   | 18 | 33007037 | A | A | A | A | A    | A |
| 5355 | rs3718586   | 18 | 33572164 | G | A | A | G | A    | G |
| 5356 | rs6239750   | 18 | 34039970 | A | A | A | A | A    | A |
| 5357 | rs3723870   | 18 | 34009418 | A | A | A | G | A    | A |
| 5358 | rs6247392   | 18 | 34001365 | G | G | G | G | G    | G |
| 5359 | rs3717761   | 18 | 34103539 | A | A | A | G | A    | A |
| 5360 | rs3719580   | 18 | 34113296 | C | C | C | A | C    | C |
| 5361 | rs3705413   | 18 | 34354033 | G | G | A | A | G    | A |
| 5362 | rs8255038   | 18 | 34699970 | G | A | G | G | A    | G |
| 5363 | rs8255039   | 18 | 34700733 | A | A | A | A | A    | A |
| 5364 | rs3725637   | 18 | 34867922 | C | C | C | A | C    | A |
| 5365 | rs4231783   | 18 | 34880525 | G | G | G | G | G    | G |
| 5366 | rs3663045   | 18 | 34995545 | A | A | A | G | A    | G |
| 5367 | rs3701931   | 18 | 35039632 | A | C | A | C | C    | C |
| 5368 | rs3675531   | 18 | 35484760 | G | G | G | A | G    | A |
| 5369 | rs3714096   | 18 | 36136675 | G | G | A | G | G    | G |
| 5370 | rs6163326   | 18 | 36252139 | A | G | A | A | G    | A |
| 5371 | rs6389331   | 18 | 36474881 | A | A | A | A | A    | A |
| 5372 | rs3654071   | 18 | 36457123 | A | G | G | A | G    | A |
| 5373 | rs4231787   | 18 | 37110628 | G | G | G | G | G    | G |
| 5374 | rs3703106   | 18 | 37131538 | C | C | C | A | NONE | C |
| 5375 | rs8243297   | 18 | 37168597 | A | A | A | A | A    | A |
| 5376 | rs8255719   | 18 | 37169067 | A | A | A | G | A    | A |
| 5377 | rs6298679   | 18 | 37173233 | G | G | G | A | G    | G |
| 5378 | mCV24094701 | 18 | 39180646 | A | G | G | A | G    | A |
| 5379 | rs3664831   | 18 | 37737388 | C | C | C | A | C    | C |
| 5380 | rs3697964   | 18 | 38267355 | G | G | A | G | G    | G |
| 5381 | rs8255071   | 18 | 38382651 | A | A | A | A | A    | A |
| 5382 | rs8255054   | 18 | 38385001 | G | G | G | G | G    | G |
| 5383 | rs8255052   | 18 | 38386144 | A | A | A | A | A    | A |
| 5384 | rs8255051   | 18 | 38387266 | G | G | G | G | G    | G |
| 5385 | rs8255047   | 18 | 38388225 | A | A | A | A | A    | A |
| 5386 | rs3700198   | 18 | 38432022 | G | G | G | A | G    | G |
| 5387 | rs3679365   | 18 | 38918094 | G | G | A | G | G    | A |
| 5388 | rs4231815   | 18 | 39282149 | C | C | C | C | C    | C |
| 5389 | rs4231819   | 18 | 39282219 | G | G | G | G | G    | G |
| 5390 | rs3669650   | 18 | 39390540 | A | A | A | G | A    | G |
| 5391 | rs6261236   | 18 | 39421495 | A | A | A | A | A    | A |
| 5392 | rs3699816   | 18 | 39756682 | G | G | G | A | G    | A |
| 5393 | rs8259560   | 18 | 39858310 | G | G | G | G | G    | G |
| 5394 | rs8259534   | 18 | 39865499 | G | G | G | G | G    | G |
| 5395 | rs8259553   | 18 | 39867896 | G | G | G | G | G    | G |
| 5396 | rs8259552   | 18 | 39868041 | G | G | G | G | G    | G |
| 5397 | rs3678901   | 18 | 39928937 | G | G | G | A | G    | A |
| 5398 | rs8240448   | 18 | 39934591 | A | A | A | A | A    | A |
| 5399 | rs6163341   | 18 | 40258600 | G | G | G | G | G    | G |

|      |             |    |          |   |   |   |   |      |   |
|------|-------------|----|----------|---|---|---|---|------|---|
| 5400 | mCV23302006 | 18 | 42614789 | G | A | A | G | A    | G |
| 5401 | rs3656236   | 18 | 41342056 | G | G | A | A | NONE | A |
| 5402 | rs6179902   | 18 | 41394515 | A | A | G | G | A    | G |
| 5403 | rs6204949   | 18 | 41480954 | A | A | A | A | A    | A |
| 5404 | rs3089327   | 18 | 42223388 | C | C | C | C | C    | C |
| 5405 | rs6313313   | 18 | 42102260 | G | G | G | A | G    | G |
| 5406 | rs6363007   | 18 | 42111168 | C | C | C | C | C    | C |
| 5407 | rs6288658   | 18 | 49864878 | A | A | A | A | A    | A |
| 5408 | rs3711076   | 18 | 42857406 | A | A | A | G | A    | A |
| 5409 | rs6323500   | 18 | 42863443 | A | G | G | G | G    | A |
| 5410 | rs4221967   | 18 | 43015979 | A | A | A | A | A    | A |
| 5411 | rs3089840   | 18 | 43158143 | A | A | A | A | A    | A |
| 5412 | rs6217237   | 18 | 43234262 | G | G | G | G | G    | G |
| 5413 | rs3715190   | 18 | 43395940 | A | A | A | C | A    | A |
| 5414 | rs3690657   | 18 | 43631028 | A | A | A | G | A    | G |
| 5415 | rs3655318   | 18 | 43824277 | T | T | T | A | T    | T |
| 5416 | rs3722777   | 18 | 44404491 | A | C | A | C | A    | A |
| 5417 | rs4231839   | 18 | 44463284 | A | A | A | A | A    | A |
| 5418 | rs6182841   | 18 | 44699271 | A | A | A | A | A    | A |
| 5419 | rs6192044   | 18 | 47242647 | C | C | C | C | C    | C |
| 5420 | rs3656192   | 18 | 45282758 | T | T | A | T | A    | T |
| 5421 | rs3657131   | 18 | 45335172 | G | A | A | G | A    | G |
| 5422 | rs4138936   | 18 | 45372492 | A | C | C | C | C    | A |
| 5423 | rs3676483   | 18 | 45381444 | A | A | A | C | A    | A |
| 5424 | rs6159382   | 18 | 46202607 | G | G | G | G | G    | G |
| 5425 | rs6236248   | 18 | 46907224 | A | A | A | A | A    | A |
| 5426 | rs4231845   | 18 | 46684237 | C | C | C | C | C    | C |
| 5427 | rs4231842   | 18 | 46684495 | G | G | A | G | A    | G |
| 5428 | rs3716758   | 18 | 46720133 | A | A | A | T | A    | A |
| 5429 | rs3659020   | 18 | 46720342 | A | A | A | G | A    | A |
| 5430 | rs3088812   | 18 | 48025738 | C | C | C | G | C    | C |
| 5431 | mCV24106092 | 18 | 49464960 | C | C | C | A | C    | C |
| 5432 | rs3674256   | 18 | 47587690 | A | A | G | A | G    | A |
| 5433 | rs3721430   | 18 | 47609589 | G | G | G | A | G    | G |
| 5434 | rs6184541   | 18 | 47884501 | A | A | G | A | G    | A |
| 5435 | rs4139897   | 18 | 48301422 | G | G | G | A | G    | G |
| 5436 | rs3714312   | 18 | 48616500 | G | G | A | A | A    | G |
| 5437 | rs3707785   | 18 | 49147258 | A | A | G | A | G    | A |
| 5438 | rs3718133   | 18 | 49143735 | G | G | A | G | A    | G |
| 5439 | rs3684561   | 18 | 49102908 | A | C | C | C | C    | A |
| 5440 | rs3089047   | 18 | 49234950 | A | A | A | A | A    | A |
| 5441 | rs6326826   | 18 | 49330912 | A | A | G | A | G    | A |
| 5442 | rs3090896   | 18 | 49596118 | A | A | G | G | G    | G |
| 5443 | rs3703039   | 18 | 49719879 | A | A | G | A | G    | G |
| 5444 | rs4138356   | 18 | 50024484 | A | A | A | A | G    | G |
| 5445 | rs6384465   | 18 | 50062469 | A | A | G | A | A    | A |
| 5446 | rs3657958   | 18 | 50417128 | A | A | A | G | A    | A |
| 5447 | rs6353725   | 18 | 50338671 | C | C | C | C | C    | C |
| 5448 | rs3674314   | 18 | 51674308 | A | T | T | T | T    | T |
| 5449 | rs4231849   | 18 | 51784672 | A | A | A | A | A    | A |
| 5450 | rs4231846   | 18 | 51785032 | A | A | A | A | A    | A |
| 5451 | mCV22331476 | 18 | 54309209 | A | C | C | A | A    | A |
| 5452 | rs6262441   | 18 | 52814428 | G | G | G | G | G    | G |
| 5453 | rs3722312   | 18 | 52826928 | G | G | G | A | G    | G |
| 5454 | rs4231853   | 18 | 52996979 | C | C | C | C | C    | C |
| 5455 | rs8243426   | 18 | 53009205 | G | G | G | G | G    | G |
| 5456 | rs3090299   | 18 | 53550194 | C | C | C | C | C    | C |
| 5457 | rs3665626   | 18 | 53651426 | A | A | A | T | A    | A |
| 5458 | rs6315116   | 18 | 53653164 | G | A | A | A | A    | A |
| 5459 | rs3683337   | 18 | 53880488 | G | G | G | A | G    | G |
| 5460 | rs6152921   | 18 | 53745589 | G | G | G | G | G    | G |
| 5461 | rs4231857   | 18 | 54175849 | A | A | A | A | A    | A |
| 5462 | rs3681210   | 18 | 54538463 | A | C | A | C | C    | C |
| 5463 | rs6172588   | 18 | 55215646 | A | A | A | A | A    | A |
| 5464 | rs4138249   | 18 | 55239367 | G | G | G | G | G    | G |
| 5465 | rs3088626   | 18 | 55350910 | G | G | G | G | G    | G |
| 5466 | rs6159970   | 18 | 55432634 | C | C | C | C | C    | C |
| 5467 | rs3683378   | 18 | 56183873 | C | C | G | C | C    | C |
| 5468 | rs3684646   | 18 | 56184126 | A | A | G | A | A    | A |
| 5469 | rs6281219   | 18 | 56770661 | A | A | A | A | A    | A |
| 5470 | rs3654438   | 18 | 56796176 | G | G | A | A | A    | G |
| 5471 | mCV23191036 | 18 | 58974019 | A | C | A | A | A    | A |
| 5472 | rs3655793   | 18 | 57734357 | G | G | G | A | G    | G |
| 5473 | rs3724103   | 18 | 57741423 | G | G | G | A | G    | G |

|      |             |    |          |      |   |      |   |      |      |
|------|-------------|----|----------|------|---|------|---|------|------|
| 5474 | mCV24036087 | 18 | 59617542 | A    | T | T    | T | T    | T    |
| 5475 | rs3705107   | 18 | 57935634 | G    | A | G    | A | G    | G    |
| 5476 | rs6328845   | 18 | 58310005 | A    | A | A    | G | A    | G    |
| 5477 | rs3670254   | 18 | 58394117 | T    | T | T    | A | T    | T    |
| 5478 | rs3090956   | 18 | 58450045 | G    | G | G    | G | G    | G    |
| 5479 | rs8239211   | 18 | 58515377 | A    | A | A    | A | A    | A    |
| 5480 | rs8239209   | 18 | 58515423 | A    | G | A    | G | A    | G    |
| 5481 | rs8239208   | 18 | 58515466 | G    | G | G    | G | G    | G    |
| 5482 | rs3669543   | 18 | 58570705 | A    | A | A    | G | A    | A    |
| 5483 | rs3713935   | 18 | 58981153 | A    | G | A    | G | A    | A    |
| 5484 | rs3666286   | 18 | 59090139 | C    | C | A    | A | A    | C    |
| 5485 | rs6167993   | 18 | 59243139 | T    | T | T    | T | T    | T    |
| 5486 | rs3688263   | 18 | 59727433 | C    | A | A    | A | A    | A    |
| 5487 | rs6192612   | 18 | 59926407 | G    | A | A    | A | A    | A    |
| 5488 | rs4231875   | 18 | 59927053 | C    | G | NONE | G | NONE | NONE |
| 5489 | rs4231874   | 18 | 59927141 | G    | G | G    | G | G    | G    |
| 5490 | mCV24036663 | 18 | 62328246 | G    | G | A    | A | A    | A    |
| 5491 | rs3685720   | 18 | 60565588 | G    | A | A    | A | A    | A    |
| 5492 | rs6273531   | 18 | 60871806 | G    | A | A    | A | A    | A    |
| 5493 | rs4231879   | 18 | 60942609 | G    | G | G    | G | G    | G    |
| 5494 | rs8255172   | 18 | 61321870 | A    | A | A    | A | A    | A    |
| 5495 | rs8237391   | 18 | 61320141 | A    | C | A    | A | A    | A    |
| 5496 | rs8237392   | 18 | 61320118 | C    | A | C    | C | C    | C    |
| 5497 | rs8243395   | 18 | 61533689 | G    | G | G    | G | G    | G    |
| 5498 | rs8243392   | 18 | 61534483 | A    | A | A    | A | A    | A    |
| 5499 | rs3677707   | 18 | 61897032 | A    | G | G    | G | G    | G    |
| 5500 | rs6381950   | 18 | 61911608 | A    | A | A    | A | A    | A    |
| 5501 | rs3694537   | 18 | 62145996 | C    | A | C    | C | C    | C    |
| 5502 | rs3721651   | 18 | 62505058 | C    | A | A    | A | A    | A    |
| 5503 | rs8252709   | 18 | 62699178 | G    | G | A    | G | G    | G    |
| 5504 | rs8243367   | 18 | 62695880 | A    | A | A    | A | A    | A    |
| 5505 | rs8237402   | 18 | 62695790 | A    | A | G    | G | G    | A    |
| 5506 | rs3705875   | 18 | 62914964 | A    | G | A    | A | A    | A    |
| 5507 | rs4231899   | 18 | 63022572 | G    | A | G    | G | G    | A    |
| 5508 | rs3720827   | 18 | 63808511 | A    | A | A    | G | G    | G    |
| 5509 | rs3023468   | 18 | 64005825 | G    | G | G    | C | C    | G    |
| 5510 | rs3669248   | 18 | 64125633 | T    | A | A    | T | T    | A    |
| 5511 | rs6352864   | 18 | 64179675 | G    | C | C    | C | C    | C    |
| 5512 | rs4211918   | 18 | 64467851 | A    | A | A    | G | G    | G    |
| 5513 | rs3656801   | 18 | 64981172 | G    | G | G    | G | G    | G    |
| 5514 | rs6317313   | 18 | 65038629 | A    | A | A    | A | A    | A    |
| 5515 | rs3688789   | 18 | 65035105 | G    | A | A    | A | A    | G    |
| 5516 | rs3684964   | 18 | 65181320 | A    | C | C    | C | C    | A    |
| 5517 | rs4231907   | 18 | 65502438 | A    | G | G    | A | A    | G    |
| 5518 | mCV24008503 | 18 | 67657581 | G    | A | A    | G | G    | G    |
| 5519 | rs6320743   | 18 | 65694361 | G    | A | G    | A | A    | G    |
| 5520 | rs4138277   | 18 | 65975417 | G    | G | G    | A | A    | G    |
| 5521 | rs3724033   | 18 | 66196307 | G    | G | G    | A | G    | A    |
| 5522 | rs6367649   | 18 | 66532807 | G    | G | G    | G | G    | G    |
| 5523 | rs3691542   | 18 | 67000836 | G    | A | G    | A | G    | G    |
| 5524 | rs3704084   | 18 | 67083465 | G    | A | G    | A | G    | A    |
| 5525 | rs3088449   | 18 | 66936471 | A    | A | A    | A | A    | A    |
| 5526 | rs6334085   | 18 | 67318667 | G    | G | G    | G | G    | G    |
| 5527 | rs6374678   | 18 | 67518735 | G    | G | G    | G | G    | G    |
| 5528 | rs3716803   | 18 | 67523287 | A    | G | A    | G | A    | G    |
| 5529 | rs3675194   | 18 | 67588372 | G    | G | G    | A | G    | G    |
| 5530 | rs4231913   | 18 | 67844186 | G    | G | G    | G | G    | G    |
| 5531 | rs3663770   | 18 | 68130437 | C    | C | C    | G | C    | C    |
| 5532 | rs3720764   | 18 | 68500356 | G    | G | G    | A | G    | G    |
| 5533 | rs3700328   | 18 | 68664885 | A    | A | A    | G | A    | A    |
| 5534 | rs8256630   | 18 | 68864519 | A    | A | A    | A | A    | A    |
| 5535 | rs8256626   | 18 | 68864802 | A    | A | A    | A | A    | A    |
| 5536 | rs3091133   | 18 | 68865739 | A    | A | A    | A | A    | A    |
| 5537 | rs6397718   | 18 | 68970603 | NONE | G | G    | G | G    | G    |
| 5538 | rs3088526   | 18 | 69076778 | G    | G | G    | G | G    | G    |
| 5539 | rs3658163   | 18 | 69187029 | T    | A | A    | T | A    | T    |
| 5540 | rs3722524   | 18 | 69242483 | G    | A | A    | G | A    | G    |
| 5541 | rs4231929   | 18 | 69391594 | A    | A | A    | A | A    | A    |
| 5542 | rs3718618   | 18 | 69741786 | A    | A | A    | G | A    | A    |
| 5543 | rs3669949   | 18 | 69860436 | A    | A | A    | G | A    | A    |
| 5544 | rs6238338   | 18 | 70525900 | G    | G | G    | G | G    | G    |
| 5545 | rs3091227   | 18 | 70195462 | A    | A | A    | A | A    | A    |
| 5546 | rs3706905   | 18 | 70249607 | G    | A | G    | A | G    | A    |
| 5547 | rs3688280   | 18 | 70734872 | G    | G | G    | G | G    | G    |

|      |             |    |          |   |   |   |   |      |   |
|------|-------------|----|----------|---|---|---|---|------|---|
| 5548 | rs3684593   | 18 | 71217317 | G | A | G | A | G    | A |
| 5549 | rs3699293   | 18 | 71217426 | C | C | A | C | A    | C |
| 5550 | rs6193279   | 18 | 71351453 | A | A | A | A | A    | A |
| 5551 | rs3669074   | 18 | 71471134 | A | A | A | G | A    | A |
| 5552 | rs3663078   | 18 | 71896585 | A | G | A | G | A    | G |
| 5553 | rs6159533   | 18 | 71978007 | G | G | G | G | G    | G |
| 5554 | rs6338424   | 18 | 72318410 | A | A | A | A | A    | A |
| 5555 | rs3702134   | 18 | 72726203 | C | C | C | A | C    | C |
| 5556 | rs3661900   | 18 | 72635840 | G | G | A | G | A    | G |
| 5557 | rs3655324   | 18 | 72561102 | G | G | G | A | G    | G |
| 5558 | rs3672215   | 18 | 72899203 | C | C | C | G | C    | C |
| 5559 | rs6335278   | 18 | 73445383 | C | C | C | C | C    | C |
| 5560 | mCV23234519 | 18 | 75656118 | C | A | C | A | C    | A |
| 5561 | rs3675243   | 18 | 73509694 | A | A | G | G | G    | A |
| 5562 | rs3715548   | 18 | 73713729 | A | G | A | A | A    | G |
| 5563 | rs6402381   | 18 | 73796074 | G | G | G | G | G    | G |
| 5564 | rs2020564   | 18 | 74078292 | C | C | C | C | NONE | C |
| 5565 | rs3654625   | 18 | 74425314 | A | A | G | G | G    | A |
| 5566 | rs3687542   | 18 | 74673091 | G | G | A | A | G    | G |
| 5567 | rs4231934   | 18 | 74800133 | A | A | A | C | A    | A |
| 5568 | rs6199678   | 18 | 75430903 | G | G | A | A | A    | A |
| 5569 | rs3676122   | 18 | 75971130 | A | A | C | A | C    | A |
| 5570 | rs3656890   | 18 | 76075851 | A | G | A | G | A    | G |
| 5571 | rs3682892   | 18 | 76300035 | G | G | A | A | A    | A |
| 5572 | rs3023475   | 18 | 76343871 | A | G | A | A | A    | A |
| 5573 | rs3690119   | 18 | 76365872 | A | G | A | A | A    | A |
| 5574 | rs6381624   | 18 | 76483171 | A | G | G | A | G    | A |
| 5575 | rs3655845   | 18 | 76686529 | A | G | A | A | A    | A |
| 5576 | rs3724679   | 18 | 76549319 | T | A | A | A | A    | A |
| 5577 | rs3667668   | 18 | 77102667 | G | G | A | G | A    | G |
| 5578 | rs4231935   | 18 | 77576478 | T | T | T | T | T    | T |
| 5579 | mCV27555925 | 18 | 79520197 | G | G | A | A | A    | G |
| 5580 | rs3706601   | 18 | 77890660 | G | G | G | A | G    | A |
| 5581 | rs6238171   | 18 | 78528167 | C | C | C | C | C    | C |
| 5582 | rs3718829   | 18 | 78706072 | G | A | A | A | A    | G |
| 5583 | rs3715003   | 18 | 79153211 | G | A | A | A | A    | G |
| 5584 | rs6175715   | 18 | 79898980 | G | G | G | G | G    | G |
| 5585 | rs6356607   | 18 | 79974863 | G | A | G | G | G    | G |
| 5586 | rs3676197   | 18 | 80005623 | G | A | G | G | G    | G |
| 5587 | rs3720876   | 18 | 80361633 | T | T | A | A | A    | T |
| 5588 | rs6209100   | 18 | 80505882 | G | G | G | G | G    | G |
| 5589 | rs3708419   | 18 | 81109284 | G | G | A | A | A    | A |
| 5590 | rs4231975   | 18 | 81161882 | G | G | G | G | G    | G |
| 5591 | rs3671707   | 18 | 81232693 | G | G | A | A | A    | A |
| 5592 | rs3682618   | 18 | 81275345 | G | A | A | A | A    | A |
| 5593 | rs3708298   | 18 | 82040765 | A | G | A | G | G    | G |
| 5594 | rs6221045   | 18 | 82074573 | G | G | G | G | G    | G |
| 5595 | rs3664173   | 18 | 82166534 | A | G | G | G | G    | G |
| 5596 | rs8243362   | 18 | 83030321 | A | A | A | A | A    | A |
| 5597 | rs4231991   | 18 | 83061521 | G | G | G | G | G    | G |
| 5598 | rs4231990   | 18 | 83061630 | A | A | A | A | A    | A |
| 5599 | rs6242815   | 18 | 83073941 | C | C | C | C | C    | C |
| 5600 | rs3090314   | 18 | 83928446 | A | A | A | A | A    | A |
| 5601 | rs6202456   | 18 | 83970622 | G | G | G | G | G    | G |
| 5602 | rs3701686   | 18 | 84291891 | G | A | A | A | A    | A |
| 5603 | mCV24836796 | 18 | 86034550 | A | G | G | A | G    | G |
| 5604 | rs6279692   | 18 | 85472076 | G | G | G | G | G    | G |
| 5605 | rs4232000   | 18 | 85493536 | G | A | A | A | A    | A |
| 5606 | rs4231999   | 18 | 85493622 | A | A | A | A | A    | A |
| 5607 | rs3676394   | 18 | 85889302 | A | G | G | G | G    | G |
| 5608 | rs6171557   | 18 | 86278873 | C | A | A | A | A    | A |
| 5609 | rs3671719   | 18 | 86313828 | G | G | G | A | G    | G |
| 5610 | rs3670801   | 18 | 86537199 | A | G | G | G | G    | G |
| 5611 | rs6323225   | 18 | 86922399 | C | C | C | C | C    | C |
| 5612 | rs3716100   | 18 | 87105494 | T | A | A | T | A    | A |
| 5613 | rs3680424   | 18 | 87107142 | A | G | G | A | G    | G |
| 5614 | rs3682795   | 18 | 87361323 | T | A | A | A | A    | A |
| 5615 | mCV24945827 | 18 | 88626089 | G | A | A | A | A    | A |
| 5616 | rs6244050   | 18 | 87872724 | C | C | C | C | C    | C |
| 5617 | mCV22792607 | 18 | 89053497 | A | T | T | T | T    | A |
| 5618 | rs6248120   | 18 | 87584216 | A | A | A | A | A    | A |
| 5619 | rs6408078   | 18 | 88842086 | G | G | G | G | G    | G |
| 5620 | rs3090303   | 18 | 88913666 | C | C | C | C | C    | C |
| 5621 | rs4137441   | 18 | 89120861 | G | A | A | A | A    | G |

|      |             |    |          |   |   |   |   |   |   |
|------|-------------|----|----------|---|---|---|---|---|---|
| 5622 | rs6282736   | 18 | 89424880 | A | G | G | G | G | A |
| 5623 | mCV22762066 | 18 | 90515196 | T | A | A | A | A | T |
| 5624 | mCV23657398 | 18 | 91026994 | T | A | A | A | A | A |
| 5625 | mCV24763607 | 18 | 90101432 | A | G | G | G | G | A |
| 5626 | mCV24766238 | 18 | 90582606 | G | A | A | A | A | G |
| 5627 | rs6193060   | 19 | 60615451 | G | G | G | A | G | G |
| 5628 | rs3700209   | 19 | 10197210 | G | G | A | G | A | A |
| 5629 | rs4232174   | 19 | 41102683 | A | G | A | A | A | A |
| 5630 | rs3704150   | 19 | 45938792 | G | G | G | A | G | G |
| 5631 | rs3653771   | 19 | 23736677 | A | G | G | A | G | A |
| 5632 | rs6207491   | 19 | 46010432 | A | A | A | A | A | A |
| 5633 | rs8239552   | 19 | 46010249 | G | G | A | G | G | A |
| 5634 | rs3658667   | 19 | 19885530 | A | G | A | G | A | G |
| 5635 | rs8239563   | 19 | 46009656 | G | G | A | G | G | A |
| 5636 | rs8250444   | 19 | 46007615 | A | A | G | A | A | G |
| 5637 | rs3723852   | 19 | 23742644 | G | G | A | G | A | G |
| 5638 | mCV24130963 | 19 | 55192    | G | G | G | G | C | G |
| 5639 | mCV25314100 | 19 | 4634437  | G | G | G | G | A | G |
| 5640 | rs6213403   | 19 | 3053099  | A | A | A | A | A | A |
| 5641 | rs3023688   | 19 | 3243816  | A | G | G | A | G | G |
| 5642 | rs6296521   | 19 | 3781610  | C | C | C | C | C | C |
| 5643 | rs8236985   | 19 | 3825121  | A | A | A | A | A | A |
| 5644 | rs8257628   | 19 | 3830290  | A | A | A | A | A | G |
| 5645 | rs8257622   | 19 | 3830481  | A | A | A | A | A | A |
| 5646 | rs4232037   | 19 | 3953685  | G | G | A | G | G | G |
| 5647 | rs3671671   | 19 | 4208173  | C | A | A | C | C | C |
| 5648 | rs4232036   | 19 | 4214649  | C | A | A | C | C | C |
| 5649 | rs3690148   | 19 | 4229871  | G | A | A | G | G | A |
| 5650 | mCV23214561 | 19 | 7219351  | A | A | A | A | G | A |
| 5651 | rs6350768   | 19 | 4528690  | A | G | A | A | G | G |
| 5652 | rs3713033   | 19 | 4818261  | G | A | A | G | A | G |
| 5653 | rs4232029   | 19 | 4838414  | C | C | C | C | C | C |
| 5654 | rs6339583   | 19 | 4987483  | A | A | A | A | A | A |
| 5655 | rs6215956   | 19 | 5271216  | G | G | G | G | G | G |
| 5656 | rs4232023   | 19 | 5392129  | A | G | A | A | G | G |
| 5657 | rs8279948   | 19 | 5800693  | A | A | A | A | A | A |
| 5658 | rs8279898   | 19 | 5803150  | A | A | A | A | A | A |
| 5659 | rs6236348   | 19 | 6000186  | A | G | G | A | G | G |
| 5660 | rs3091023   | 19 | 6696105  | A | A | A | A | A | A |
| 5661 | rs6302797   | 19 | 6710076  | C | C | C | C | C | C |
| 5662 | rs6275876   | 19 | 7118769  | G | G | G | G | G | G |
| 5663 | rs3023477   | 19 | 7133376  | G | G | G | G | A | A |
| 5664 | rs4232011   | 19 | 7252030  | G | G | G | G | G | A |
| 5665 | mCV24585577 | 19 | 9273612  | G | A | A | G | A | G |
| 5666 | rs8264743   | 19 | 7717080  | C | C | C | C | C | C |
| 5667 | rs8264747   | 19 | 7717348  | C | C | C | C | C | A |
| 5668 | rs8264775   | 19 | 7721031  | C | C | C | C | C | C |
| 5669 | rs6335227   | 19 | 7747331  | C | C | C | C | C | C |
| 5670 | mCV23008375 | 19 | 10249422 | A | G | A | A | A | A |
| 5671 | rs4232045   | 19 | 8026886  | A | A | A | A | A | A |
| 5672 | rs4139262   | 19 | 8018568  | G | A | A | G | G | G |
| 5673 | rs4232044   | 19 | 7839674  | G | G | G | G | G | G |
| 5674 | rs4232042   | 19 | 7839384  | G | G | G | G | A | G |
| 5675 | rs3673624   | 19 | 8264142  | A | G | G | A | A | A |
| 5676 | rs4232051   | 19 | 9084182  | A | A | A | A | A | A |
| 5677 | rs4232056   | 19 | 9551732  | G | C | C | G | C | G |
| 5678 | rs8267736   | 19 | 9773019  | A | A | A | A | A | A |
| 5679 | rs8267764   | 19 | 9774135  | G | A | G | G | G | G |
| 5680 | rs6163293   | 19 | 9899424  | G | A | G | G | G | A |
| 5681 | rs3090873   | 19 | 9957707  | G | G | G | G | G | G |
| 5682 | rs3023075   | 6  | 78893070 | C | C | C | C | C | C |
| 5683 | rs6285845   | 19 | 10909330 | A | G | A | A | A | G |
| 5684 | rs4232058   | 19 | 11028367 | G | A | G | G | G | A |
| 5685 | rs3674862   | 19 | 11194496 | G | A | A | G | A | A |
| 5686 | rs3688406   | 19 | 11531705 | A | G | A | A | A | A |
| 5687 | rs3671328   | 19 | 11873778 | G | G | A | G | A | G |
| 5688 | rs3705736   | 19 | 11959885 | C | C | A | C | A | C |
| 5689 | rs6349685   | 19 | 12013775 | G | G | A | G | A | G |
| 5690 | rs6237846   | 19 | 12452484 | C | C | A | C | A | A |
| 5691 | rs3694570   | 19 | 13056716 | G | G | A | G | A | A |
| 5692 | rs6306968   | 19 | 13598306 | A | A | G | A | G | A |
| 5693 | rs4137097   | 19 | 13599336 | G | G | C | G | C | G |
| 5694 | rs4232068   | 19 | 13726607 | T | T | T | T | T | T |
| 5695 | rs3659857   | 19 | 14072812 | A | A | G | A | G | A |

|      |             |    |          |      |   |   |   |   |   |
|------|-------------|----|----------|------|---|---|---|---|---|
| 5696 | rs3661175   | 19 | 14073038 | G    | G | A | G | A | G |
| 5697 | mCV24419235 | 19 | 16235572 | A    | A | G | G | A | A |
| 5698 | rs3704158   | 19 | 14244274 | C    | C | A | C | A | C |
| 5699 | rs4136257   | 19 | 14643563 | G    | A | A | G | A | G |
| 5700 | rs6268186   | 19 | 14655411 | A    | G | G | A | G | A |
| 5701 | rs3661215   | 19 | 14795903 | A    | G | G | A | G | G |
| 5702 | rs4232072   | 19 | 15182862 | T    | T | T | T | T | T |
| 5703 | rs4232071   | 19 | 15183141 | NONE | C | C | C | C | C |
| 5704 | rs6319765   | 19 | 15759352 | G    | G | G | G | G | G |
| 5705 | rs3662712   | 19 | 15964901 | G    | G | G | G | G | G |
| 5706 | rs3669192   | 19 | 16124735 | G    | G | A | A | A | G |
| 5707 | rs3686467   | 19 | 16159229 | G    | G | A | A | G | G |
| 5708 | rs6172420   | 19 | 16716062 | G    | G | G | G | A | G |
| 5709 | rs8267682   | 19 | 16858147 | G    | A | A | A | G | G |
| 5710 | rs8267576   | 19 | 16873839 | G    | G | G | G | G | G |
| 5711 | rs8267392   | 19 | 16954644 | A    | G | G | G | G | A |
| 5712 | rs4232099   | 19 | 16972924 | A    | A | A | A | G | A |
| 5713 | rs6211545   | 19 | 16986855 | A    | A | A | A | G | A |
| 5714 | rs8267308   | 19 | 16991018 | G    | G | G | G | A | G |
| 5715 | rs8267310   | 19 | 16991104 | G    | G | G | G | G | G |
| 5716 | rs3681194   | 19 | 17584355 | A    | A | A | G | A | G |
| 5717 | rs6223359   | 19 | 17804343 | A    | A | A | G | A | G |
| 5718 | rs4140311   | 19 | 17884605 | G    | A | A | A | G | A |
| 5719 | rs3673310   | 19 | 17976672 | G    | A | A | A | G | G |
| 5720 | rs3694495   | 19 | 19168174 | A    | A | A | T | A | A |
| 5721 | rs6411707   | 19 | 19172402 | G    | G | G | A | G | G |
| 5722 | rs3720318   | 19 | 19458954 | G    | A | G | G | G | A |
| 5723 | rs3723753   | 19 | 19502328 | T    | T | T | A | T | A |
| 5724 | rs3023480   | 19 | 19624890 | A    | A | A | C | A | C |
| 5725 | rs6380630   | 19 | 19680108 | G    | G | G | G | G | G |
| 5726 | rs3090812   | 19 | 19695717 | C    | C | C | C | C | C |
| 5727 | rs8239254   | 19 | 19915169 | T    | T | T | T | T | T |
| 5728 | rs3668911   | 19 | 19915494 | A    | A | A | G | A | G |
| 5729 | rs8239869   | 19 | 19999544 | C    | C | C | C | C | C |
| 5730 | rs6223813   | 19 | 20066123 | A    | G | A | A | A | A |
| 5731 | rs3726449   | 19 | 20347272 | A    | A | A | A | A | C |
| 5732 | rs3682187   | 19 | 20738869 | G    | G | A | A | A | G |
| 5733 | rs6245242   | 19 | 20748732 | A    | A | A | G | A | A |
| 5734 | rs6392565   | 19 | 21461474 | A    | G | A | A | A | G |
| 5735 | rs3707812   | 19 | 21674170 | G    | G | G | A | G | G |
| 5736 | rs3672759   | 19 | 21707322 | A    | A | T | A | T | A |
| 5737 | rs3653630   | 19 | 21729294 | C    | C | C | A | C | C |
| 5738 | rs6342493   | 19 | 21905509 | A    | G | A | G | A | G |
| 5739 | rs3090137   | 19 | 22071353 | G    | G | G | A | G | G |
| 5740 | rs4232102   | 19 | 22438463 | A    | A | A | A | A | A |
| 5741 | rs6217094   | 19 | 22493246 | A    | A | C | A | C | A |
| 5742 | rs4232108   | 19 | 22993421 | G    | A | G | G | G | G |
| 5743 | rs3687901   | 19 | 23001090 | G    | G | A | G | A | G |
| 5744 | rs3688671   | 19 | 23001257 | A    | A | G | A | G | A |
| 5745 | rs3660275   | 19 | 23053220 | A    | A | A | A | A | G |
| 5746 | rs3697576   | 19 | 23088139 | G    | A | G | A | G | A |
| 5747 | rs6259521   | 19 | 23219454 | T    | T | A | T | A | T |
| 5748 | rs4232112   | 19 | 23245440 | G    | G | A | G | A | G |
| 5749 | rs4232111   | 19 | 23245416 | C    | C | A | C | A | C |
| 5750 | rs3670355   | 19 | 24245675 | G    | G | A | G | A | G |
| 5751 | rs3720897   | 19 | 24396755 | A    | G | A | A | A | A |
| 5752 | rs3691133   | 19 | 24661375 | G    | A | G | G | G | G |
| 5753 | rs4232120   | 19 | 24709314 | C    | C | C | C | C | C |
| 5754 | rs3701438   | 19 | 24941259 | A    | A | C | A | C | A |
| 5755 | rs6361137   | 19 | 24957266 | A    | A | G | A | G | A |
| 5756 | rs6166640   | 19 | 25059711 | A    | G | A | G | A | G |
| 5757 | rs3724885   | 19 | 25333658 | A    | G | G | A | G | G |
| 5758 | rs3669236   | 19 | 25643608 | G    | G | G | A | G | G |
| 5759 | rs6186902   | 19 | 25999644 | A    | G | A | A | A | A |
| 5760 | rs3090325   | 19 | 26007713 | G    | A | A | A | A | G |
| 5761 | rs6254371   | 19 | 26153729 | A    | G | A | A | A | A |
| 5762 | rs3089211   | 19 | 26389006 | G    | G | G | G | G | G |
| 5763 | rs4232127   | 19 | 26528340 | G    | G | G | G | G | G |
| 5764 | rs6291559   | 19 | 26849645 | A    | A | G | G | G | A |
| 5765 | rs3723418   | 19 | 27042361 | C    | C | A | A | A | C |
| 5766 | rs6238322   | 19 | 27335880 | A    | G | A | A | A | A |
| 5767 | rs3717280   | 19 | 27376721 | A    | A | G | G | G | G |
| 5768 | mCV24505422 | 19 | 29964780 | G    | A | G | A | G | A |
| 5769 | rs6312543   | 19 | 28172801 | G    | G | G | G | G | G |

|      |             |    |          |   |   |   |   |   |   |
|------|-------------|----|----------|---|---|---|---|---|---|
| 5770 | rs6153867   | 19 | 28191034 | A | A | A | A | A | A |
| 5771 | rs3714482   | 19 | 28235010 | A | G | G | G | G | G |
| 5772 | rs4232130   | 19 | 28441324 | A | A | A | A | A | A |
| 5773 | rs6366840   | 19 | 28448526 | C | A | A | A | A | A |
| 5774 | rs3089688   | 19 | 28700499 | G | G | G | G | G | G |
| 5775 | rs6172077   | 19 | 28797164 | A | A | A | A | A | A |
| 5776 | rs3695543   | 19 | 29301588 | A | T | T | T | T | T |
| 5777 | rs4232135   | 19 | 29395022 | A | A | A | A | A | A |
| 5778 | mCV24995143 | 19 | 31560624 | G | G | G | G | G | G |
| 5779 | rs3704503   | 19 | 29618618 | G | A | G | A | G | A |
| 5780 | rs6224900   | 19 | 29848562 | A | A | G | A | G | A |
| 5781 | rs6352879   | 19 | 30253148 | G | G | G | G | G | G |
| 5782 | rs4232140   | 19 | 30651530 | A | A | A | A | A | A |
| 5783 | rs3681148   | 19 | 30716634 | A | G | G | G | G | A |
| 5784 | rs3693805   | 19 | 30840505 | C | G | G | G | G | G |
| 5785 | rs6344448   | 19 | 30816535 | T | A | A | A | A | T |
| 5786 | rs4232148   | 19 | 31293711 | C | C | C | C | C | C |
| 5787 | rs3685192   | 19 | 31413334 | A | G | G | A | G | G |
| 5788 | rs3686450   | 19 | 31413557 | G | C | C | G | C | C |
| 5789 | rs6237466   | 19 | 31672951 | A | A | A | T | A | A |
| 5790 | rs4232151   | 19 | 31982985 | G | G | C | G | C | G |
| 5791 | rs4232150   | 19 | 31983142 | G | G | A | G | A | G |
| 5792 | rs3089994   | 19 | 32190404 | C | C | C | C | C | C |
| 5793 | rs3672117   | 19 | 32197321 | A | G | G | A | G | G |
| 5794 | rs6269629   | 19 | 32208756 | C | A | A | C | A | A |
| 5795 | rs6283850   | 19 | 32369068 | A | A | A | A | A | A |
| 5796 | rs6200234   | 19 | 33442060 | A | C | A | A | A | C |
| 5797 | rs4232159   | 19 | 33785778 | G | G | G | G | G | G |
| 5798 | rs4232158   | 19 | 33783411 | G | G | G | G | G | G |
| 5799 | rs3089343   | 19 | 34209019 | G | G | G | G | G | G |
| 5800 | mCV27551335 | 19 | 36511227 | G | G | A | A | A | G |
| 5801 | rs6372028   | 19 | 34954648 | C | C | C | C | C | A |
| 5802 | rs6339069   | 19 | 35322257 | G | G | G | G | G | G |
| 5803 | rs3705022   | 19 | 35600828 | T | T | T | A | T | T |
| 5804 | rs3691354   | 19 | 35613101 | A | A | A | G | A | A |
| 5805 | rs3710581   | 19 | 35620543 | C | G | C | C | C | C |
| 5806 | mCV24526730 | 19 | 36968850 | C | C | C | G | C | C |
| 5807 | rs6213166   | 19 | 36105184 | A | A | A | A | A | A |
| 5808 | rs3713879   | 19 | 36118341 | G | G | G | A | G | G |
| 5809 | rs3726962   | 19 | 36228470 | A | A | A | G | A | A |
| 5810 | rs6371145   | 19 | 36282623 | G | G | G | A | G | G |
| 5811 | rs3089834   | 19 | 36672715 | A | A | A | A | A | A |
| 5812 | rs8248714   | 19 | 36922630 | G | G | G | G | G | G |
| 5813 | rs8248762   | 19 | 36925420 | A | A | A | A | A | A |
| 5814 | rs3653886   | 19 | 36962492 | A | A | G | A | G | A |
| 5815 | rs6337024   | 19 | 37062964 | G | G | G | A | G | G |
| 5816 | rs3660293   | 19 | 37288799 | A | A | A | G | A | A |
| 5817 | rs3699974   | 19 | 37297277 | A | A | A | G | A | A |
| 5818 | rs3710829   | 19 | 37393165 | A | A | A | G | A | G |
| 5819 | mCV23121032 | 19 | 40316204 | G | A | G | G | G | G |
| 5820 | rs6185741   | 19 | 38062272 | G | G | G | C | G | G |
| 5821 | rs6162778   | 19 | 38066937 | C | C | C | A | C | C |
| 5822 | rs3703185   | 19 | 38197686 | C | C | C | A | C | C |
| 5823 | rs3718223   | 19 | 38326060 | G | G | G | A | G | G |
| 5824 | rs8247843   | 19 | 38574094 | C | C | C | C | C | C |
| 5825 | rs8247874   | 19 | 38595602 | A | A | A | C | A | A |
| 5826 | rs8247885   | 19 | 38596872 | A | A | A | A | A | A |
| 5827 | rs8247896   | 19 | 38608452 | A | A | A | G | A | A |
| 5828 | rs8247901   | 19 | 38608577 | C | C | C | C | C | C |
| 5829 | rs6289489   | 19 | 38811626 | A | A | A | A | A | A |
| 5830 | rs3697139   | 19 | 39427196 | A | A | T | A | T | A |
| 5831 | rs3672423   | 19 | 39425502 | G | G | C | C | C | G |
| 5832 | rs3655407   | 19 | 39594395 | C | C | A | A | A | C |
| 5833 | rs6350637   | 19 | 39650073 | A | A | A | G | A | A |
| 5834 | rs3665780   | 19 | 39653074 | C | C | C | A | C | C |
| 5835 | rs3677115   | 19 | 39919326 | G | G | G | A | G | A |
| 5836 | rs6328964   | 19 | 40359209 | G | A | G | G | G | G |
| 5837 | rs4232165   | 19 | 40547318 | C | C | C | C | C | C |
| 5838 | rs3668166   | 19 | 40639328 | G | A | G | A | G | G |
| 5839 | rs3679068   | 19 | 40685040 | G | A | G | A | G | A |
| 5840 | rs3653396   | 19 | 40978193 | G | G | G | A | G | G |
| 5841 | rs6396860   | 19 | 41231342 | G | G | G | A | G | G |
| 5842 | rs3697841   | 19 | 41289555 | G | G | G | A | G | G |
| 5843 | rs3696425   | 19 | 41364799 | A | A | A | G | A | A |

|      |             |    |          |   |   |   |   |   |   |
|------|-------------|----|----------|---|---|---|---|---|---|
| 5844 | rs4232180   | 19 | 41527482 | A | A | A | A | A | A |
| 5845 | rs3656289   | 19 | 41749395 | A | A | A | G | A | A |
| 5846 | rs6238526   | 19 | 42010157 | G | G | G | G | G | G |
| 5847 | rs3703918   | 19 | 42106509 | G | A | G | G | A | G |
| 5848 | rs3687275   | 19 | 42406846 | A | A | C | C | A | A |
| 5849 | rs3673976   | 19 | 42665672 | G | G | G | A | G | G |
| 5850 | rs4232185   | 19 | 42831942 | C | C | C | C | C | C |
| 5851 | rs3695752   | 19 | 43015886 | G | G | G | A | G | G |
| 5852 | mCV23390953 | 19 | 45356002 | A | G | A | A | G | A |
| 5853 | rs8250750   | 19 | 43134869 | G | A | G | G | A | G |
| 5854 | rs8245094   | 19 | 43135529 | C | A | C | C | A | C |
| 5855 | rs8237002   | 19 | 43147635 | A | A | A | G | A | A |
| 5856 | rs8242070   | 19 | 43154339 | G | G | G | A | G | G |
| 5857 | rs8242053   | 19 | 43162445 | A | G | G | A | G | A |
| 5858 | rs8237008   | 19 | 43172940 | G | C | C | C | C | G |
| 5859 | rs6245539   | 19 | 43186537 | G | G | G | A | G | G |
| 5860 | rs3654725   | 19 | 43253748 | A | A | A | G | A | A |
| 5861 | rs3676927   | 19 | 43287520 | A | A | A | C | A | A |
| 5862 | rs4232207   | 19 | 43409816 | A | A | A | A | A | A |
| 5863 | rs3090951   | 19 | 43410999 | G | G | G | G | G | G |
| 5864 | rs3694723   | 19 | 43417782 | A | A | A | G | A | A |
| 5865 | rs3726430   | 19 | 43476737 | C | A | A | A | A | C |
| 5866 | rs6276649   | 19 | 43763446 | A | C | A | A | C | C |
| 5867 | mCV23045722 | 19 | 46489003 | A | A | A | G | A | G |
| 5868 | rs3675915   | 19 | 44302199 | C | C | G | C | C | C |
| 5869 | rs3656005   | 19 | 44674391 | G | G | G | A | G | G |
| 5870 | rs3711994   | 19 | 44870299 | A | A | A | G | A | A |
| 5871 | rs6235674   | 19 | 45256117 | G | G | G | G | G | G |
| 5872 | rs4232223   | 19 | 45477448 | C | C | C | C | C | C |
| 5873 | rs3722316   | 19 | 45576248 | G | G | G | A | G | G |
| 5874 | rs4232232   | 19 | 45626576 | G | G | G | G | G | G |
| 5875 | rs3654209   | 19 | 46136258 | A | A | A | G | A | A |
| 5876 | rs6362473   | 19 | 46249049 | G | G | G | A | G | G |
| 5877 | rs3705264   | 19 | 46315574 | A | G | G | A | G | G |
| 5878 | rs3658160   | 19 | 46364695 | C | A | A | C | A | A |
| 5879 | rs3655896   | 19 | 46906761 | C | C | C | A | C | C |
| 5880 | rs8257524   | 19 | 47199155 | C | C | C | C | C | C |
| 5881 | rs8257576   | 19 | 47204097 | A | A | A | A | A | A |
| 5882 | rs8257588   | 19 | 47207858 | A | A | G | A | A | A |
| 5883 | rs8257591   | 19 | 47208085 | G | G | G | G | G | G |
| 5884 | rs8257619   | 19 | 47208475 | A | A | A | T | A | A |
| 5885 | rs3023496   | 19 | 47482330 | A | A | A | G | A | A |
| 5886 | rs6349824   | 19 | 47507066 | G | G | G | A | G | G |
| 5887 | mCV24595223 | 19 | 49824850 | C | C | A | A | C | C |
| 5888 | mCV23150139 | 19 | 49957079 | A | A | G | G | A | A |
| 5889 | rs3660360   | 19 | 47718339 | G | G | A | A | G | A |
| 5890 | rs3664825   | 19 | 47721918 | G | G | A | A | G | A |
| 5891 | rs3089112   | 19 | 47730230 | G | G | G | G | G | G |
| 5892 | rs3089113   | 19 | 47730255 | C | C | C | C | C | C |
| 5893 | mCV23151545 | 19 | 50014396 | A | A | G | G | A | A |
| 5894 | mCV23151923 | 19 | 50027917 | G | G | A | A | G | G |
| 5895 | rs4232253   | 19 | 48149686 | C | C | C | C | C | C |
| 5896 | rs4232254   | 19 | 48149798 | T | T | T | T | T | T |
| 5897 | rs6153081   | 19 | 48731684 | G | G | G | G | G | G |
| 5898 | mCV22978357 | 19 | 50298700 | G | G | A | A | A | G |
| 5899 | rs6194426   | 19 | 49475053 | A | G | G | G | G | G |
| 5900 | rs3676974   | 19 | 49640350 | G | A | A | A | A | A |
| 5901 | mCV22979960 | 19 | 50370537 | C | G | G | C | G | G |
| 5902 | mCV22979964 | 19 | 50370702 | G | A | A | G | A | A |
| 5903 | rs3699073   | 19 | 49885821 | T | T | A | A | T | T |
| 5904 | rs3692717   | 19 | 49920513 | A | A | A | G | A | A |
| 5905 | rs6177228   | 19 | 49923803 | G | G | G | A | G | G |
| 5906 | rs3716572   | 19 | 50071598 | A | A | G | G | A | A |
| 5907 | mCV23069037 | 19 | 51646426 | G | G | G | A | G | G |
| 5908 | mCV22608007 | 19 | 51798964 | A | A | A | G | A | G |
| 5909 | rs3666302   | 19 | 51198027 | G | A | A | A | A | A |
| 5910 | mCV23069572 | 19 | 52162185 | A | A | A | G | A | G |
| 5911 | rs3721874   | 19 | 51317746 | C | G | G | G | G | G |
| 5912 | rs3091059   | 19 | 51622213 | A | A | A | A | A | A |
| 5913 | rs3718102   | 19 | 51621238 | G | A | A | A | A | A |
| 5914 | rs8275600   | 19 | 52355953 | A | A | A | G | A | G |
| 5915 | rs8236997   | 19 | 52356501 | G | G | G | A | G | A |
| 5916 | rs3722335   | 19 | 52361173 | A | A | A | G | A | G |
| 5917 | rs8275718   | 19 | 52362498 | G | G | G | G | G | G |



|      |             |    |           |      |   |   |   |   |   |
|------|-------------|----|-----------|------|---|---|---|---|---|
| 5918 | rs3672780   | 19 | 52365729  | G    | G | G | A | G | A |
| 5919 | rs8276019   | 19 | 52368205  | A    | A | A | A | A | A |
| 5920 | mCV23072435 | 19 | 53100821  | C    | C | C | C | C | C |
| 5921 | rs4138008   | 19 | 52583233  | G    | G | G | A | G | A |
| 5922 | rs4232257   | 19 | 52606316  | C    | C | C | C | C | C |
| 5923 | rs6257938   | 19 | 52744319  | G    | G | G | C | G | C |
| 5924 | rs6304326   | 19 | 52797648  | C    | C | C | A | C | C |
| 5925 | rs6326311   | 19 | 53327828  | G    | G | G | G | G | G |
| 5926 | mCV24736382 | 19 | 54207735  | G    | G | G | A | G | G |
| 5927 | rs3691357   | 19 | 53609409  | A    | A | A | G | A | A |
| 5928 | rs6185483   | 19 | 54609252  | A    | G | G | G | G | G |
| 5929 | rs3655171   | 19 | 54628331  | G    | A | G | A | G | G |
| 5930 | rs6303591   | 19 | 54655608  | A    | G | A | G | A | A |
| 5931 | rs3654713   | 19 | 54392587  | G    | G | G | A | G | G |
| 5932 | rs3660143   | 19 | 54403033  | G    | G | G | A | G | G |
| 5933 | rs3709671   | 19 | 54991850  | G    | G | G | A | G | A |
| 5934 | rs6222014   | 19 | 54905003  | G    | G | G | A | G | G |
| 5935 | rs3089427   | 19 | 55767221  | A    | A | A | A | A | A |
| 5936 | rs3686750   | 19 | 55733126  | C    | A | A | A | A | A |
| 5937 | rs3023497   | 19 | 55994689  | G    | G | A | G | A | G |
| 5938 | rs3663566   | 19 | 56250823  | G    | A | A | G | A | G |
| 5939 | rs6211533   | 19 | 56380821  | A    | A | C | A | C | A |
| 5940 | rs4222107   | 19 | 56421779  | G    | G | G | G | G | G |
| 5941 | rs3719692   | 19 | 56997687  | C    | A | C | A | C | C |
| 5942 | rs3718687   | 19 | 56865524  | A    | G | G | G | G | A |
| 5943 | rs3716179   | 19 | 56832728  | C    | C | A | C | A | C |
| 5944 | rs6259462   | 19 | 57286731  | G    | G | G | A | G | G |
| 5945 | rs3710053   | 19 | 57518787  | A    | A | A | G | A | A |
| 5946 | rs4232264   | 19 | 57523483  | A    | A | A | A | A | A |
| 5947 | rs3694663   | 19 | 57539773  | C    | C | C | A | C | C |
| 5948 | rs3706406   | 19 | 57861401  | G    | G | G | C | G | G |
| 5949 | rs3711945   | 19 | 58109941  | C    | C | C | A | C | C |
| 5950 | rs6183889   | 19 | 58116358  | A    | G | G | A | G | A |
| 5951 | rs3676948   | 19 | 58190157  | A    | G | G | G | G | A |
| 5952 | rs4232265   | 19 | 58194641  | A    | A | A | A | A | A |
| 5953 | rs6191324   | 19 | 58720409  | A    | G | G | A | G | A |
| 5954 | rs3658400   | 19 | 58854931  | A    | A | A | C | A | A |
| 5955 | rs3712604   | 19 | 59328147  | G    | G | G | A | G | G |
| 5956 | rs4232268   | 19 | 59540540  | C    | C | C | A | C | C |
| 5957 | rs4232275   | 19 | 59540381  | NONE | G | G | A | G | G |
| 5958 | mCV23482939 | 19 | 60432097  | A    | A | A | G | A | A |
| 5959 | rs3718998   | 19 | 59881040  | A    | A | A | G | A | A |
| 5960 | rs3694467   | 19 | 59928762  | A    | A | A | G | A | A |
| 5961 | rs6192258   | 19 | 60353870  | G    | G | G | G | G | G |
| 5962 | rs3692709   | 19 | 60343567  | G    | G | G | A | G | G |
| 5963 | rs6228270   | 19 | 60191556  | G    | G | G | C | G | G |
| 5964 | rs6364684   | 2  | 106701807 | A    | G | G | A | G | A |
| 5965 | rs4223152   | 2  | 52654660  | A    | A | A | A | A | A |
| 5966 | rs3712058   | 2  | 57039569  | A    | A | A | G | A | A |
| 5967 | rs4223204   | 2  | 68149027  | C    | C | C | C | C | C |
| 5968 | rs3656787   | 2  | 109026034 | G    | G | A | G | G | G |
| 5969 | rs3711532   | 2  | 106670167 | G    | G | A | G | G | G |
| 5970 | mCV25103560 | 2  | 5917582   | C    | G | C | G | C | C |
| 5971 | rs6220817   | 2  | 3041581   | G    | A | A | A | A | G |
| 5972 | rs3713997   | 2  | 3181746   | A    | G | G | G | G | G |
| 5973 | rs6411822   | 2  | 3273268   | G    | A | A | A | A | A |
| 5974 | rs3680350   | 2  | 3910588   | G    | A | A | A | A | G |
| 5975 | rs4136817   | 2  | 4258057   | A    | G | G | G | G | A |
| 5976 | rs4222934   | 2  | 4536999   | A    | A | A | A | A | A |
| 5977 | rs6308296   | 2  | 4701800   | G    | A | A | A | A | A |
| 5978 | rs4222938   | 2  | 4855239   | G    | G | G | G | G | G |
| 5979 | rs3692487   | 2  | 5403215   | G    | A | A | A | A | A |
| 5980 | rs3678168   | 2  | 5606042   | C    | C | C | C | C | C |
| 5981 | rs6331390   | 2  | 5921915   | A    | G | A | G | A | G |
| 5982 | rs3676722   | 2  | 6075725   | G    | A | G | A | G | G |
| 5983 | rs3695983   | 2  | 6179935   | G    | A | A | A | G | G |
| 5984 | rs6368110   | 2  | 6355104   | A    | A | A | A | A | A |
| 5985 | rs4222951   | 2  | 6491568   | A    | A | A | A | A | A |
| 5986 | rs3089292   | 2  | 6638777   | G    | G | G | G | G | G |
| 5987 | rs6184395   | 2  | 6970424   | A    | A | A | A | A | A |
| 5988 | rs6318892   | 2  | 6996747   | A    | A | A | A | A | A |
| 5989 | rs6332299   | 2  | 7592522   | A    | A | A | A | A | A |
| 5990 | rs6228421   | 2  | 8099809   | G    | A | G | G | G | G |
| 5991 | rs3090363   | 2  | 8858648   | A    | A | A | A | A | A |

|      |             |   |          |   |     |     |   |     |   |
|------|-------------|---|----------|---|-----|-----|---|-----|---|
| 5992 | rs6155402   | 2 | 9189394  | G | G   | G   | G | G   | G |
| 5993 | rs3090361   | 2 | 9561868  | G | A   | G   | G | G   | A |
| 5994 | rs4222956   | 2 | 9649100  | G | G   | G   | G | G   | G |
| 5995 | rs6302769   | 2 | 9735202  | A | A/G | A/G | A | A/G | A |
| 5996 | rs3696091   | 2 | 10171941 | A | A   | G   | G | G   | A |
| 5997 | rs6159599   | 2 | 10396791 | C | A   | A   | A | A   | A |
| 5998 | rs3719255   | 2 | 10706792 | G | A   | A   | A | A   | G |
| 5999 | rs6240512   | 2 | 10929543 | A | G   | G   | G | G   | A |
| 6000 | rs3724417   | 2 | 11068501 | A | G   | G   | G | G   | G |
| 6001 | rs4222971   | 2 | 11684187 | A | A   | A   | A | A   | A |
| 6002 | rs3090977   | 2 | 11684460 | G | G   | G   | G | G   | G |
| 6003 | rs3090808   | 2 | 11955448 | A | A   | A   | A | A   | A |
| 6004 | rs4137557   | 2 | 12017866 | A | G   | G   | G | G   | A |
| 6005 | rs4222975   | 2 | 12057896 | A | A   | A   | A | A   | A |
| 6006 | rs6172408   | 2 | 12582823 | A | A   | A   | A | A   | A |
| 6007 | rs6297721   | 2 | 12791291 | A | A   | A   | A | A   | A |
| 6008 | rs4222977   | 2 | 12952322 | C | C   | C   | C | C   | C |
| 6009 | rs8238698   | 2 | 13527336 | G | G   | G   | G | G   | G |
| 6010 | rs8238707   | 2 | 13527746 | A | A   | A   | A | A   | A |
| 6011 | rs4222980   | 2 | 13602788 | G | G   | G   | G | G   | G |
| 6012 | rs6315134   | 2 | 14199316 | A | A   | A   | A | A   | A |
| 6013 | rs3091183   | 2 | 14282434 | A | A   | A   | A | A   | A |
| 6014 | mCV25433152 | 2 | 17967514 | G | G   | G   | G | A   | G |
| 6015 | rs6357799   | 2 | 14912730 | A | A   | A   | A | A   | A |
| 6016 | rs6207464   | 2 | 15881696 | G | G   | G   | G | G   | G |
| 6017 | rs6276392   | 2 | 16464264 | A | A   | A   | A | A   | A |
| 6018 | rs6204508   | 2 | 16985143 | G | G   | G   | G | G   | G |
| 6019 | rs6367650   | 2 | 17555817 | A | A   | A   | A | A   | A |
| 6020 | rs6218422   | 2 | 18817528 | A | G   | A   | A | G   | A |
| 6021 | rs4222990   | 2 | 18903152 | G | G   | G   | G | G   | G |
| 6022 | rs6236971   | 2 | 19843793 | A | G   | A   | A | G   | A |
| 6023 | rs6292983   | 2 | 20073059 | G | A   | G   | G | A   | G |
| 6024 | rs3688854   | 2 | 20337457 | A | A   | A   | G | A   | A |
| 6025 | rs3674936   | 2 | 20427488 | G | G   | G   | A | G   | G |
| 6026 | rs6165425   | 2 | 20814394 | A | G   | A   | A | G   | G |
| 6027 | rs4223007   | 2 | 21263714 | C | C   | C   | C | C   | C |
| 6028 | rs6215138   | 2 | 21581189 | G | A   | G   | G | A   | A |
| 6029 | rs6369767   | 2 | 22555462 | A | G   | A   | A | G   | G |
| 6030 | rs6193345   | 2 | 23303787 | A | G   | A   | A | G   | G |
| 6031 | mCV23574676 | 2 | 26837911 | C | G   | C   | C | G   | C |
| 6032 | rs8240181   | 2 | 24009528 | G | G   | G   | G | G   | G |
| 6033 | rs6301542   | 2 | 24169227 | A | G   | A   | A | G   | A |
| 6034 | rs8247993   | 2 | 24307886 | A | A   | A   | A | A   | A |
| 6035 | rs8241287   | 2 | 24309660 | C | C   | C   | C | C   | C |
| 6036 | rs6286688   | 2 | 24495175 | G | A   | G   | G | A   | G |
| 6037 | rs4223026   | 2 | 25160332 | G | G   | G   | G | G   | G |
| 6038 | rs8240079   | 2 | 25273724 | A | G   | A   | A | G   | A |
| 6039 | rs8250941   | 2 | 25427137 | A | G   | A   | A | G   | A |
| 6040 | rs8256021   | 2 | 25433522 | G | A   | G   | G | A   | G |
| 6041 | rs8243214   | 2 | 25435142 | G | C   | G   | G | C   | G |
| 6042 | rs8243211   | 2 | 25435591 | G | A   | G   | G | A   | G |
| 6043 | rs6164049   | 2 | 25499805 | A | G   | A   | A | G   | A |
| 6044 | rs3713143   | 2 | 26235083 | G | A   | A   | A | A   | A |
| 6045 | rs4223055   | 2 | 26310870 | A | A   | A   | A | A   | A |
| 6046 | rs3681655   | 2 | 26328377 | A | A   | C   | C | A   | C |
| 6047 | mCV24983191 | 2 | 30147850 | A | G   | G   | G | G   | G |
| 6048 | rs8243144   | 2 | 26874116 | G | G   | G   | G | G   | G |
| 6049 | rs8243162   | 2 | 26876951 | G | G   | G   | G | G   | G |
| 6050 | rs8255309   | 2 | 26877967 | A | A   | A   | A | A   | A |
| 6051 | rs3718405   | 2 | 27249691 | C | A   | A   | A | A   | A |
| 6052 | rs4223066   | 2 | 27403982 | G | G   | G   | G | G   | G |
| 6053 | rs4223068   | 2 | 27496085 | C | C   | C   | C | C   | C |
| 6054 | mCV23209429 | 2 | 31240017 | C | A   | C   | C | A   | A |
| 6055 | rs6181760   | 2 | 27847598 | A | G   | G   | G | G   | G |
| 6056 | rs6321858   | 2 | 28295174 | A | G   | G   | G | G   | G |
| 6057 | rs6308258   | 2 | 28506214 | G | A   | A   | A | A   | A |
| 6058 | rs4223075   | 2 | 28869030 | A | A   | A   | A | A   | A |
| 6059 | rs4223077   | 2 | 28869168 | A | A   | A   | A | A   | A |
| 6060 | rs4135557   | 2 | 29740065 | G | A   | A   | A | A   | A |
| 6061 | rs6372246   | 2 | 29750924 | A | G   | G   | G | G   | G |
| 6062 | rs3715001   | 2 | 30282017 | A | G   | G   | G | G   | G |
| 6063 | rs4223083   | 2 | 30362149 | A | A   | A   | A | A   | A |
| 6064 | rs3689602   | 2 | 30372859 | A | C   | A   | C | C   | C |
| 6065 | rs3089256   | 2 | 30547516 | G | G   | G   | G | G   | G |

|      |             |   |          |   |   |   |   |   |   |
|------|-------------|---|----------|---|---|---|---|---|---|
| 6066 | rs6389436   | 2 | 30779061 | A | A | A | A | A | A |
| 6067 | rs4223088   | 2 | 30852538 | G | G | G | G | G | G |
| 6068 | rs4223089   | 2 | 31932722 | C | C | C | C | C | C |
| 6069 | rs6171513   | 2 | 32362610 | G | G | G | G | G | G |
| 6070 | rs6301234   | 2 | 32498207 | G | G | G | G | G | G |
| 6071 | rs4223103   | 2 | 32749153 | A | A | A | A | A | A |
| 6072 | rs4223102   | 2 | 32749275 | G | G | G | G | G | G |
| 6073 | rs4223105   | 2 | 33690256 | A | A | A | A | A | A |
| 6074 | rs6324892   | 2 | 33781261 | A | A | A | A | A | A |
| 6075 | rs6356428   | 2 | 34589679 | A | C | A | A | C | C |
| 6076 | mCV25370550 | 2 | 33902810 | A | G | A | A | G | G |
| 6077 | rs4223114   | 2 | 35148160 | G | G | G | G | G | G |
| 6078 | rs3683729   | 2 | 35246560 | G | G | G | G | G | G |
| 6079 | rs6375627   | 2 | 35604362 | A | A | A | A | A | A |
| 6080 | rs6398097   | 2 | 35895968 | A | A | A | A | A | A |
| 6081 | rs4223123   | 2 | 35996244 | G | G | G | G | G | G |
| 6082 | rs3699934   | 2 | 36061667 | A | A | A | C | A | A |
| 6083 | rs3723453   | 2 | 36601726 | A | A | A | C | A | A |
| 6084 | rs6230757   | 2 | 37054789 | C | C | C | C | C | C |
| 6085 | rs3666019   | 2 | 37424334 | A | A | A | G | A | A |
| 6086 | rs3709811   | 2 | 37617104 | A | A | A | G | A | A |
| 6087 | rs3022883   | 2 | 37711241 | C | C | C | A | C | C |
| 6088 | rs6247199   | 2 | 37891792 | A | A | A | A | A | A |
| 6089 | rs3088950   | 2 | 38300034 | A | A | A | A | A | A |
| 6090 | rs3682314   | 2 | 38523255 | A | A | A | G | A | A |
| 6091 | rs3665986   | 2 | 38575067 | C | C | C | G | C | C |
| 6092 | rs6169841   | 2 | 39014618 | C | C | C | C | C | C |
| 6093 | rs4223132   | 2 | 39121478 | G | G | G | G | G | G |
| 6094 | rs3668077   | 2 | 39468205 | G | G | G | A | G | G |
| 6095 | rs6313371   | 2 | 39556000 | A | A | A | G | A | A |
| 6096 | rs3710255   | 2 | 39693671 | A | A | A | G | A | A |
| 6097 | rs6323034   | 2 | 40300906 | G | G | G | A | G | G |
| 6098 | rs3668871   | 2 | 40302014 | G | G | G | A | G | G |
| 6099 | rs6324652   | 2 | 40759530 | T | T | T | A | T | T |
| 6100 | rs3672727   | 2 | 40901509 | A | A | A | C | A | A |
| 6101 | rs3714900   | 2 | 40929271 | G | G | G | A | G | G |
| 6102 | rs4136879   | 2 | 41400045 | A | A | A | G | A | A |
| 6103 | rs6404799   | 2 | 41934264 | A | A | A | T | A | T |
| 6104 | rs3672528   | 2 | 42361103 | A | A | A | C | A | C |
| 6105 | rs3712270   | 2 | 42643097 | G | G | G | C | G | C |
| 6106 | rs6288325   | 2 | 42846125 | C | C | C | A | C | A |
| 6107 | mCV22297233 | 2 | 44548310 | C | C | C | A | C | C |
| 6108 | rs6295520   | 2 | 43034728 | A | A | A | T | A | T |
| 6109 | rs3695528   | 2 | 43120744 | A | A | A | G | A | G |
| 6110 | rs6259718   | 2 | 44054897 | A | A | A | A | A | A |
| 6111 | rs3680197   | 2 | 44168883 | A | A | A | G | A | G |
| 6112 | rs3723568   | 2 | 44180718 | A | A | A | G | A | G |
| 6113 | mCV25122694 | 2 | 45928263 | A | A | A | G | A | A |
| 6114 | rs3669981   | 2 | 45081013 | G | G | G | A | G | G |
| 6115 | rs3673491   | 2 | 45084457 | G | G | G | A | G | G |
| 6116 | rs3675860   | 2 | 45084855 | A | A | A | C | A | A |
| 6117 | rs6282473   | 2 | 45112531 | A | A | A | G | A | A |
| 6118 | rs6209424   | 2 | 45627021 | C | C | C | A | C | C |
| 6119 | rs3718404   | 2 | 45839971 | A | A | A | G | A | A |
| 6120 | rs3721831   | 2 | 46035946 | A | A | A | T | A | A |
| 6121 | rs3711308   | 2 | 46189006 | T | T | T | A | T | T |
| 6122 | rs6168090   | 2 | 46264289 | C | C | C | C | C | C |
| 6123 | rs6265423   | 2 | 47124603 | C | G | G | C | G | G |
| 6124 | rs3699238   | 2 | 47356753 | A | G | G | A | G | A |
| 6125 | rs3720745   | 2 | 47357957 | C | C | C | A | C | A |
| 6126 | rs3677201   | 2 | 47958113 | A | G | G | G | G | G |
| 6127 | rs6314935   | 2 | 47987258 | C | C | C | A | C | A |
| 6128 | rs3675399   | 2 | 48355812 | A | G | G | A | G | G |
| 6129 | rs6380260   | 2 | 48500634 | A | C | C | C | C | A |
| 6130 | rs4223134   | 2 | 48864503 | A | A | A | A | A | A |
| 6131 | rs4223140   | 2 | 49219001 | G | G | G | G | G | G |
| 6132 | rs3089639   | 2 | 49358000 | G | G | G | G | G | G |
| 6133 | rs6204382   | 2 | 49477777 | G | A | A | A | A | A |
| 6134 | rs3679976   | 2 | 49667282 | G | A | A | A | A | A |
| 6135 | rs3713055   | 2 | 50225113 | C | A | A | A | A | C |
| 6136 | rs4223145   | 2 | 50240277 | G | G | G | G | G | G |
| 6137 | rs6269713   | 2 | 51183061 | A | A | A | T | A | A |
| 6138 | rs3678632   | 2 | 51184989 | A | A | A | G | A | G |
| 6139 | rs3720957   | 2 | 51356779 | C | C | C | G | C | C |

|      |             |   |          |     |   |      |   |     |   |
|------|-------------|---|----------|-----|---|------|---|-----|---|
| 6140 | rs3725341   | 2 | 51425686 | G   | G | G    | A | G   | G |
| 6141 | rs3662008   | 2 | 51765899 | G   | G | G    | A | G   | G |
| 6142 | rs6395698   | 2 | 51875277 | G   | G | G    | A | G   | G |
| 6143 | rs4223147   | 2 | 52081878 | A   | A | A    | A | A   | A |
| 6144 | rs4223149   | 2 | 52082115 | A   | A | A    | A | A   | A |
| 6145 | rs3675868   | 2 | 52201209 | A   | A | A    | T | A   | A |
| 6146 | rs3677306   | 2 | 52713489 | G   | G | G    | A | G   | G |
| 6147 | rs6229455   | 2 | 53288469 | A   | A | A    | C | A   | A |
| 6148 | rs6354206   | 2 | 53333789 | G   | G | G    | A | G   | G |
| 6149 | rs3665866   | 2 | 53431535 | T   | T | T    | A | T   | T |
| 6150 | rs3666514   | 2 | 53431677 | A   | A | A    | G | A   | A |
| 6151 | rs3722454   | 2 | 53801198 | A   | A | A/G  | G | A/G | A |
| 6152 | rs6293999   | 2 | 53801861 | G   | G | G    | A | G   | G |
| 6153 | rs3658919   | 2 | 54112475 | A   | A | A    | G | A   | A |
| 6154 | rs3654841   | 2 | 54484670 | G   | G | G    | A | G   | G |
| 6155 | rs3686229   | 2 | 54584766 | G   | G | G    | A | G   | G |
| 6156 | mCV25039989 | 2 | 56783206 | A   | A | A    | T | A   | A |
| 6157 | rs6201706   | 2 | 55367289 | G   | G | G    | A | G   | G |
| 6158 | rs4223159   | 2 | 55400499 | A   | A | A    | A | A   | A |
| 6159 | rs3696517   | 2 | 55634236 | G   | G | G    | A | G   | G |
| 6160 | rs3699909   | 2 | 55750856 | G   | G | G    | A | G   | G |
| 6161 | rs3718711   | 2 | 56489184 | G   | G | G    | A | G   | G |
| 6162 | rs3655184   | 2 | 56525578 | A   | A | A    | G | A   | A |
| 6163 | rs3662347   | 2 | 56550930 | A   | A | A    | T | A   | A |
| 6164 | rs3671741   | 2 | 56555351 | T   | T | T    | A | T   | T |
| 6165 | rs6253453   | 2 | 56869272 | G   | G | G    | A | G   | G |
| 6166 | rs8240489   | 2 | 57065349 | G   | G | G    | G | G   | G |
| 6167 | rs8240479   | 2 | 57067807 | A   | A | A    | A | A   | A |
| 6168 | rs3707138   | 2 | 57156202 | T   | T | T    | A | T   | T |
| 6169 | rs3727027   | 2 | 57157059 | A   | A | A    | T | A   | A |
| 6170 | rs3663027   | 2 | 57613222 | A   | A | A    | G | A   | A |
| 6171 | rs6268714   | 2 | 57665023 | G   | G | G    | A | G   | G |
| 6172 | rs6212192   | 2 | 57688265 | G   | G | G    | G | G   | G |
| 6173 | rs4223175   | 2 | 58086367 | G   | G | G    | G | G   | G |
| 6174 | rs3672719   | 2 | 58142938 | C   | C | C    | G | C   | C |
| 6175 | rs3704104   | 2 | 59370950 | G   | G | G    | G | G   | G |
| 6176 | rs3708975   | 2 | 59539084 | A   | G | G    | G | G   | G |
| 6177 | rs6195225   | 2 | 59776923 | A   | A | A    | A | A   | A |
| 6178 | rs3683761   | 2 | 59848326 | A   | G | G    | G | G   | G |
| 6179 | rs6261532   | 2 | 60121932 | A   | A | A    | A | A   | A |
| 6180 | rs4223185   | 2 | 60190997 | G   | G | G    | G | G   | G |
| 6181 | rs3660779   | 2 | 60586963 | G   | A | A    | A | G   | A |
| 6182 | rs6292751   | 2 | 60767085 | G   | A | A    | A | A   | A |
| 6183 | rs6387861   | 2 | 61516099 | A   | A | A    | A | A   | A |
| 6184 | rs4223188   | 2 | 61738506 | A   | A | A    | A | A   | A |
| 6185 | rs4223189   | 2 | 61738719 | G   | A | A    | A | G   | A |
| 6186 | rs3688501   | 2 | 61878785 | G   | A | A    | A | G   | A |
| 6187 | rs6318340   | 2 | 62101002 | G   | A | A    | A | G   | G |
| 6188 | rs6287471   | 2 | 62282583 | A   | A | A    | A | A   | A |
| 6189 | rs8252866   | 2 | 62351073 | A   | A | A    | A | A   | A |
| 6190 | rs3022886   | 2 | 62583970 | G   | A | A    | G | A   | A |
| 6191 | rs3089896   | 2 | 62584025 | G   | G | G    | G | G   | G |
| 6192 | rs3709716   | 2 | 62590944 | C   | C | C    | G | C   | C |
| 6193 | mCV24799807 | 2 | 64415531 | C   | A | A    | A | A   | A |
| 6194 | rs6391732   | 2 | 62941643 | C   | A | A    | A | C   | C |
| 6195 | rs6190548   | 2 | 62996486 | G   | A | A    | A | G   | G |
| 6196 | rs3664317   | 2 | 63787792 | A   | G | G    | G | A   | A |
| 6197 | rs6314726   | 2 | 64051479 | C   | A | A    | A | C   | C |
| 6198 | rs4223190   | 2 | 64545599 | G   | G | G    | G | G   | G |
| 6199 | rs3676478   | 2 | 64680614 | G   | A | A    | A | G   | G |
| 6200 | rs6302554   | 2 | 64797248 | G   | G | G    | G | A   | G |
| 6201 | rs3653963   | 2 | 64885735 | A   | C | C    | C | C   | A |
| 6202 | mCV25071967 | 2 | 66791415 | A/T | A | A    | A | A   | A |
| 6203 | rs6274192   | 2 | 65296447 | C   | G | G    | G | C   | G |
| 6204 | rs6153871   | 2 | 65617313 | A   | A | A    | A | A/G | A |
| 6205 | rs3715385   | 2 | 66288788 | C   | A | C    | A | C   | A |
| 6206 | rs6236226   | 2 | 66352120 | G   | A | G    | A | G   | A |
| 6207 | rs3723010   | 2 | 66439757 | A   | C | A    | C | A   | C |
| 6208 | rs3089671   | 2 | 66702321 | A   | A | A    | A | A   | A |
| 6209 | rs6172625   | 2 | 66869470 | G   | A | A    | A | A   | A |
| 6210 | mCV23778822 | 2 | 68601890 | G   | G | G    | G | A   | G |
| 6211 | rs3022885   | 2 | 67031499 | G   | G | G    | G | A   | G |
| 6212 | rs6177630   | 2 | 67159885 | A   | G | A    | G | G   | G |
| 6213 | rs3710978   | 2 | 67652238 | A   | G | NONE | G | A   | G |

|      |             |   |          |      |      |   |   |   |   |
|------|-------------|---|----------|------|------|---|---|---|---|
| 6214 | rs3689965   | 2 | 67824985 | A    | G    | A | G | G | G |
| 6215 | rs6381994   | 2 | 68188374 | A    | A    | A | A | G | A |
| 6216 | mCV25429456 | 2 | 69874398 | T    | A    | A | T | A | A |
| 6217 | rs3726227   | 2 | 68782769 | A    | T    | A | T | T | T |
| 6218 | rs6371268   | 2 | 68927682 | G    | G    | A | A | A | G |
| 6219 | rs3022887   | 2 | 69021770 | G    | G    | A | A | A | G |
| 6220 | rs3699027   | 2 | 69039268 | G    | G    | A | A | A | G |
| 6221 | rs8236495   | 2 | 69177795 | G    | G    | A | G | G | G |
| 6222 | rs8263587   | 2 | 69185883 | A    | G    | A | G | G | G |
| 6223 | rs6218423   | 2 | 69197466 | A    | A    | A | A | A | A |
| 6224 | rs6219012   | 2 | 69197574 | A    | A    | A | A | A | A |
| 6225 | rs8263432   | 2 | 69215943 | C    | C    | C | C | C | C |
| 6226 | rs8263100   | 2 | 69263952 | G    | G    | G | G | G | G |
| 6227 | rs8263180   | 2 | 69268363 | A    | A    | A | A | A | A |
| 6228 | rs8263075   | 2 | 69280800 | G    | G    | G | G | G | G |
| 6229 | rs8263077   | 2 | 69281085 | G    | G    | G | G | G | G |
| 6230 | rs8263080   | 2 | 69281486 | G    | G    | A | G | A | G |
| 6231 | rs6275559   | 2 | 69663240 | A    | C    | C | A | C | C |
| 6232 | rs4223211   | 2 | 69735480 | T    | A    | A | T | A | A |
| 6233 | rs3657805   | 2 | 69824112 | NONE | NONE | A | G | A | G |
| 6234 | rs4136610   | 2 | 70090167 | G    | A    | A | G | A | A |
| 6235 | rs6165818   | 2 | 70178096 | T    | A    | A | T | A | A |
| 6236 | rs6170389   | 2 | 70431018 | G    | A    | A | G | A | A |
| 6237 | rs3091213   | 2 | 70539918 | A    | A    | A | A | A | A |
| 6238 | rs6399973   | 2 | 70690980 | A    | A    | A | A | A | A |
| 6239 | rs3682843   | 2 | 71050924 | A    | G    | G | A | A | G |
| 6240 | rs3088797   | 2 | 71119734 | G    | G    | G | G | G | G |
| 6241 | rs4223216   | 2 | 71168869 | G    | G    | G | A | A | G |
| 6242 | rs4223213   | 2 | 71169017 | T    | T    | T | T | T | T |
| 6243 | rs6181433   | 2 | 71188547 | G    | G    | G | A | A | G |
| 6244 | rs3670752   | 2 | 71268820 | G    | G    | G | A | A | G |
| 6245 | rs3664661   | 2 | 71492729 | G    | A    | A | G | G | A |
| 6246 | rs6295014   | 2 | 71668506 | A    | C    | A | A | A | C |
| 6247 | rs3663969   | 2 | 71701325 | A    | T    | A | A | A | T |
| 6248 | rs3658672   | 2 | 71779572 | A    | G    | G | G | G | G |
| 6249 | rs8240600   | 2 | 72200140 | G    | G    | G | G | G | G |
| 6250 | rs4223219   | 2 | 73231904 | A    | A    | A | A | A | A |
| 6251 | rs4223220   | 2 | 73457252 | G    | G    | G | G | G | G |
| 6252 | rs6322742   | 2 | 73803980 | T    | T    | T | T | T | T |
| 6253 | rs6367022   | 2 | 73969390 | A    | A    | A | G | A | A |
| 6254 | rs4136564   | 2 | 74107900 | A    | A    | A | A | G | A |
| 6255 | rs3691865   | 2 | 74130281 | G    | G    | A | G | A | G |
| 6256 | rs3689263   | 2 | 74205289 | A    | A    | A | G | A | A |
| 6257 | rs3710094   | 2 | 74253437 | A    | A    | G | G | G | A |
| 6258 | rs4223228   | 2 | 74614126 | A    | A    | A | A | A | A |
| 6259 | rs4223230   | 2 | 74614249 | C    | C    | C | C | C | C |
| 6260 | rs3091097   | 2 | 74658694 | T    | T    | T | T | T | T |
| 6261 | rs3090066   | 2 | 74813576 | G    | G    | G | G | G | G |
| 6262 | rs3696052   | 2 | 74841092 | A    | A    | G | G | G | A |
| 6263 | rs6284085   | 2 | 74904994 | G    | G    | A | A | A | G |
| 6264 | rs3719468   | 2 | 74983813 | A    | A    | G | A | G | A |
| 6265 | mCV25095764 | 2 | 76990271 | G    | A    | A | A | A | G |
| 6266 | rs3683059   | 2 | 75399681 | G    | G    | G | A | A | G |
| 6267 | rs4223231   | 2 | 75569982 | C    | C    | C | C | C | C |
| 6268 | rs4223233   | 2 | 75570271 | G    | G    | G | G | G | G |
| 6269 | rs3713848   | 2 | 75912840 | T    | T    | T | A | T | A |
| 6270 | rs3713454   | 2 | 76043938 | A    | A    | A | G | A | G |
| 6271 | rs3704430   | 2 | 76082498 | A    | A    | A | G | A | G |
| 6272 | rs3673892   | 2 | 76116826 | T    | T    | T | A | T | A |
| 6273 | rs6152313   | 2 | 76129216 | C    | C    | C | A | C | A |
| 6274 | rs3726334   | 2 | 76285834 | A    | A    | A | G | A | G |
| 6275 | rs3669217   | 2 | 76364909 | C    | C    | C | A | C | A |
| 6276 | rs6281904   | 2 | 76931871 | G    | A    | A | A | A | G |
| 6277 | rs3670874   | 2 | 77084354 | C    | A    | A | A | A | C |
| 6278 | rs3672129   | 2 | 77084600 | G    | A    | A | A | A | G |
| 6279 | rs6412631   | 2 | 77110432 | A    | T    | T | T | T | A |
| 6280 | rs3711780   | 2 | 77245946 | A    | T    | T | T | T | A |
| 6281 | rs6175722   | 2 | 78364009 | C    | C    | C | C | C | C |
| 6282 | rs3088761   | 2 | 78462469 | G    | G    | G | G | G | A |
| 6283 | rs3723096   | 2 | 78795843 | G    | A    | A | A | A | A |
| 6284 | rs6268518   | 2 | 78904806 | A    | G    | G | G | G | G |
| 6285 | rs3680028   | 2 | 79532512 | G    | G    | G | A | G | A |
| 6286 | rs3682048   | 2 | 79532830 | A    | A    | A | G | A | G |
| 6287 | rs3688970   | 2 | 79552667 | G    | G    | G | A | G | A |

|      |             |   |          |     |   |     |   |   |     |
|------|-------------|---|----------|-----|---|-----|---|---|-----|
| 6288 | rs3693144   | 2 | 79556181 | G   | G | G   | A | G | A   |
| 6289 | rs4223246   | 2 | 79728676 | A   | A | A   | A | A | A   |
| 6290 | rs6410680   | 2 | 80137780 | G   | A | A   | A | A | A   |
| 6291 | rs3722345   | 2 | 80509747 | A   | G | G   | A | G | G   |
| 6292 | rs4223249   | 2 | 80525079 | C   | G | G   | C | G | G   |
| 6293 | mCV23002990 | 2 | 82444161 | C   | A | A   | C | A | C   |
| 6294 | rs6212296   | 2 | 81004132 | A   | G | G   | A | G | A   |
| 6295 | rs6217256   | 2 | 81234680 | G   | G | G   | G | G | G   |
| 6296 | mCV25110347 | 2 | 83337100 | A   | G | G   | A | G | G   |
| 6297 | rs3716390   | 2 | 81662002 | G   | A | A   | G | A | A   |
| 6298 | rs3667007   | 2 | 82000176 | G   | A | A   | G | A | A   |
| 6299 | rs3715573   | 2 | 82038041 | C   | A | A   | C | A | A   |
| 6300 | rs6362905   | 2 | 82464019 | A   | A | A   | A | A | A   |
| 6301 | mCV25302572 | 2 | 85038715 | G   | A | A   | G | A | G   |
| 6302 | rs6345370   | 2 | 83915656 | A   | G | G   | A | G | G   |
| 6303 | rs4137692   | 2 | 84012796 | A   | C | C   | A | C | A   |
| 6304 | mCV25115393 | 2 | 85842145 | A   | C | C   | A | C | A   |
| 6305 | rs4223251   | 2 | 84233339 | G   | G | G   | G | G | G   |
| 6306 | rs6280546   | 2 | 84486384 | C   | A | A   | C | A | A   |
| 6307 | rs3022888   | 2 | 84496199 | A   | G | G   | A | G | G   |
| 6308 | rs8273634   | 2 | 84665852 | G   | G | G   | G | G | G   |
| 6309 | rs8273639   | 2 | 84666393 | A   | C | C   | A | C | C   |
| 6310 | rs8273626   | 2 | 84668232 | G   | A | A   | G | A | A   |
| 6311 | rs8273627   | 2 | 84670068 | G   | G | G   | G | G | G   |
| 6312 | rs4223257   | 2 | 84940791 | A   | G | G   | A | G | G   |
| 6313 | rs4223258   | 2 | 84940830 | G   | G | G   | G | G | G   |
| 6314 | rs6199827   | 2 | 85174680 | A   | G | G   | A | G | G   |
| 6315 | rs3689658   | 2 | 85572783 | G   | A | A   | G | A | G   |
| 6316 | mCV24333820 | 2 | 87504536 | G   | A | A   | G | A | A   |
| 6317 | rs6413147   | 2 | 86686735 | T   | A | A   | T | A | T   |
| 6318 | rs3698393   | 2 | 86697871 | G   | G | A   | G | G | G   |
| 6319 | rs3675737   | 2 | 86941854 | A   | G | G   | A | G | G   |
| 6320 | rs6303646   | 2 | 86942901 | A   | G | G   | A | G | G   |
| 6321 | rs3723781   | 2 | 87728074 | C   | A | C   | C | A | A   |
| 6322 | rs6314788   | 2 | 88240358 | T   | A | T   | T | A | A   |
| 6323 | rs3686917   | 2 | 88478824 | C   | A | A   | C | A | A   |
| 6324 | rs4138433   | 2 | 88805767 | A   | C | A   | A | C | C   |
| 6325 | rs6404809   | 2 | 88899373 | G   | A | G   | G | A | A   |
| 6326 | rs6389618   | 2 | 89196916 | C   | A | C   | C | A | A   |
| 6327 | rs3719218   | 2 | 89303417 | G   | G | A   | G | G | G   |
| 6328 | rs3715323   | 2 | 89474577 | A   | A | A   | A | A | A   |
| 6329 | rs3670740   | 2 | 89479860 | A   | G | G   | A | G | G   |
| 6330 | mCV25354178 | 2 | 91792669 | G   | A | G   | G | G | G   |
| 6331 | rs3668989   | 2 | 87607024 | A   | A | C   | A | A | A   |
| 6332 | rs3670697   | 2 | 87607259 | C   | C | A   | C | C | C   |
| 6333 | rs6336994   | 2 | 91016462 | A   | G | A   | A | G | A   |
| 6334 | rs6289773   | 2 | 91201174 | A/G | G | A/G | A | G | A/G |
| 6335 | rs3720488   | 2 | 91413564 | G   | A | G   | G | A | G   |
| 6336 | rs3090413   | 2 | 91826063 | G   | G | G   | G | G | G   |
| 6337 | rs6230107   | 2 | 91903675 | A   | A | A   | A | G | G   |
| 6338 | rs4223266   | 2 | 92259521 | G   | G | G   | G | G | G   |
| 6339 | rs4136599   | 2 | 92271258 | G   | G | A   | G | G | A   |
| 6340 | rs6152024   | 2 | 92271840 | G   | G | A   | G | G | A   |
| 6341 | rs6338205   | 2 | 92300276 | G   | C | G   | G | G | G   |
| 6342 | rs3090623   | 2 | 92515391 | G   | G | G   | G | G | G   |
| 6343 | rs3664726   | 2 | 92947140 | C   | C | A   | C | C | A   |
| 6344 | rs3661811   | 2 | 93173471 | G   | A | A   | G | G | A   |
| 6345 | rs4223268   | 2 | 93313855 | A   | A | G   | A | G | G   |
| 6346 | rs6312617   | 2 | 93582036 | A   | G | G   | A | G | G   |
| 6347 | rs6189322   | 2 | 93674979 | T   | T | A   | A | A | A   |
| 6348 | rs6252400   | 2 | 94143930 | A   | A | A   | G | G | G   |
| 6349 | rs6177174   | 2 | 94516254 | G   | G | G   | G | G | G   |
| 6350 | rs6383180   | 2 | 94578980 | G   | G | G   | A | G | G   |
| 6351 | rs3674264   | 2 | 94965895 | C   | C | A   | A | C | A   |
| 6352 | rs3672274   | 2 | 95660447 | G   | G | A   | G | G | G   |
| 6353 | rs3680540   | 2 | 95667170 | T   | A | A   | A | A | A   |
| 6354 | rs6315406   | 2 | 95696831 | A   | G | A   | G | G | G   |
| 6355 | rs3656502   | 2 | 96295685 | C   | C | A   | C | C | C   |
| 6356 | rs3707096   | 2 | 96568671 | A   | A | A   | G | A | A   |
| 6357 | rs3688911   | 2 | 96748431 | A   | A | G   | G | G | G   |
| 6358 | rs6317800   | 2 | 96788073 | C   | C | C   | A | A | A   |
| 6359 | rs3694656   | 2 | 97092501 | A   | G | G   | G | A | A   |
| 6360 | rs3686565   | 2 | 97270013 | G   | A | A   | A | G | G   |
| 6361 | rs6220079   | 2 | 97379729 | G   | A | A   | A | G | G   |

|      |             |   |           |   |   |   |   |   |   |
|------|-------------|---|-----------|---|---|---|---|---|---|
| 6362 | rs6408453   | 2 | 98394420  | A | A | A | C | A | A |
| 6363 | rs3684355   | 2 | 98552250  | G | G | A | G | A | G |
| 6364 | rs3719943   | 2 | 99320065  | A | A | A | G | A | A |
| 6365 | rs3693024   | 2 | 99324671  | A | A | A | T | A | A |
| 6366 | rs6378047   | 2 | 99378126  | A | A | A | G | A | A |
| 6367 | rs3669077   | 2 | 99396048  | A | A | T | T | T | A |
| 6368 | rs3659234   | 2 | 99502860  | G | G | G | A | G | G |
| 6369 | mCV22319073 | 2 | 101546860 | G | C | G | G | G | G |
| 6370 | rs6164718   | 2 | 99719299  | G | G | G | A | G | G |
| 6371 | rs3674361   | 2 | 100029114 | C | C | C | A | C | C |
| 6372 | rs6406705   | 2 | 100253963 | A | G | A | A | A | A |
| 6373 | rs3721532   | 2 | 100883302 | C | C | C | A | C | C |
| 6374 | rs3685454   | 2 | 100937630 | G | G | A | G | A | G |
| 6375 | rs6390756   | 2 | 101085510 | G | A | G | G | G | G |
| 6376 | rs4223283   | 2 | 101595109 | A | G | A | A | A | A |
| 6377 | rs3695682   | 2 | 101614432 | G | G | A | G | A | G |
| 6378 | rs3669332   | 2 | 101723131 | A | T | A | T | A | T |
| 6379 | rs6155648   | 2 | 102059025 | G | A | G | G | G | G |
| 6380 | rs6280107   | 2 | 102465019 | A | G | A | A | A | A |
| 6381 | rs3700286   | 2 | 102525512 | G | A | A | G | A | G |
| 6382 | rs3677262   | 2 | 102779585 | C | C | C | A | A | C |
| 6383 | rs3143809   | 2 | 103177268 | A | G | A | G | G | G |
| 6384 | rs3143810   | 2 | 103177373 | A | A | A | C | A | C |
| 6385 | rs3726330   | 2 | 103313028 | A | G | A | G | G | G |
| 6386 | rs6377411   | 2 | 103383653 | C | C | C | A | C | A |
| 6387 | rs3658729   | 2 | 104083849 | G | G | G | A | G | G |
| 6388 | rs3724460   | 2 | 104106537 | A | A | A | G | A | G |
| 6389 | rs3727022   | 2 | 104244689 | G | A | G | G | A | G |
| 6390 | rs6256701   | 2 | 104320120 | C | C | C | A | C | C |
| 6391 | rs3674721   | 2 | 104594142 | A | A | A | A | A | G |
| 6392 | rs3682153   | 2 | 104875790 | A | G | G | A | G | G |
| 6393 | rs6292555   | 2 | 104923509 | A | G | G | A | G | A |
| 6394 | rs3667167   | 2 | 105072934 | A | A | A | G | A | G |
| 6395 | rs4223360   | 2 | 105197556 | A | A | A | A | A | A |
| 6396 | rs4223363   | 2 | 105197826 | A | A | A | A | A | A |
| 6397 | rs3721336   | 2 | 105246522 | G | G | A | G | G | G |
| 6398 | rs6157070   | 2 | 105617504 | A | G | G | A | G | A |
| 6399 | rs3714835   | 2 | 106081426 | G | G | A | G | G | G |
| 6400 | rs3715478   | 2 | 106081523 | G | G | G | A | G | G |
| 6401 | mCV22364916 | 2 | 108453842 | C | G | G | C | G | G |
| 6402 | rs3090369   | 2 | 106384064 | A | A | A | A | A | A |
| 6403 | rs6323360   | 2 | 106490915 | A | T | T | A | T | T |
| 6404 | rs3673618   | 2 | 106656625 | G | A | A | G | A | G |
| 6405 | rs6242654   | 2 | 107132515 | A | G | G | A | G | G |
| 6406 | rs3710584   | 2 | 107136442 | A | G | G | A | G | G |
| 6407 | rs3684115   | 2 | 107180998 | A | A | T | A | A | A |
| 6408 | rs6350987   | 2 | 107641435 | A | G | G | A | G | G |
| 6409 | rs3717598   | 2 | 107769975 | G | C | C | G | C | C |
| 6410 | rs6253550   | 2 | 108577487 | A | A | G | A | A | A |
| 6411 | rs3661171   | 2 | 108749099 | G | C | C | G | C | C |
| 6412 | rs6208879   | 2 | 109674219 | A | A | A | G | A | A |
| 6413 | rs6318808   | 2 | 109881363 | G | G | G | A | G | G |
| 6414 | rs3022892   | 2 | 109891529 | G | A | A | G | A | A |
| 6415 | rs3722739   | 2 | 110252060 | A | A | G | G | A | A |
| 6416 | rs3710221   | 2 | 110280608 | G | G | G | A | G | G |
| 6417 | rs6192679   | 2 | 110409683 | A | A | A | G | A | A |
| 6418 | rs3658023   | 2 | 110705704 | A | A | T | T | A | A |
| 6419 | rs6233337   | 2 | 111027992 | T | T | A | T | T | T |
| 6420 | rs3714433   | 2 | 111122766 | A | A | G | A | A | A |
| 6421 | rs3681694   | 2 | 112175825 | G | G | G | A | G | G |
| 6422 | rs4223400   | 2 | 112363038 | A | A | A | A | A | A |
| 6423 | rs3693678   | 2 | 112367495 | A | A | A | G | A | A |
| 6424 | rs3709715   | 2 | 112417610 | G | G | G | A | G | G |
| 6425 | rs3090376   | 2 | 112522889 | G | G | G | G | G | G |
| 6426 | rs3022893   | 2 | 112522940 | G | G | A | G | G | G |
| 6427 | rs6156488   | 2 | 112847810 | T | T | T | T | T | T |
| 6428 | rs3663963   | 2 | 113012076 | A | A | A | A | A | A |
| 6429 | rs3666945   | 2 | 113012586 | A | A | G | A | A | A |
| 6430 | rs3698165   | 2 | 113054187 | G | G | A | G | G | G |
| 6431 | rs4223405   | 2 | 113718276 | A | A | A | A | A | A |
| 6432 | rs4223406   | 2 | 113718326 | A | G | A | A | G | G |
| 6433 | rs6378299   | 2 | 114073240 | A | A | A | A | A | A |
| 6434 | mCV22528760 | 2 | 116297687 | A | G | A | G | G | A |
| 6435 | rs4138562   | 2 | 114161459 | G | G | G | A | G | G |

|      |             |   |           |      |   |   |   |     |   |
|------|-------------|---|-----------|------|---|---|---|-----|---|
| 6436 | rs3088447   | 2 | 114308210 | A    | A | T | A | A   | T |
| 6437 | rs3701250   | 2 | 114662573 | G    | G | G | A | G   | A |
| 6438 | rs6212586   | 2 | 114803331 | A    | G | A | A | G   | A |
| 6439 | rs6196399   | 2 | 114889567 | G    | G | G | A | G   | G |
| 6440 | mCV23825533 | 2 | 117535468 | C    | A | C | C | A   | C |
| 6441 | rs3657162   | 2 | 115449990 | A    | A | A | C | A   | C |
| 6442 | rs3683827   | 2 | 115599080 | G    | G | A | A | G   | G |
| 6443 | rs3699172   | 2 | 115671423 | G    | G | A | A | G   | G |
| 6444 | rs3708146   | 2 | 115787955 | A    | A | A | G | A   | A |
| 6445 | rs6276129   | 2 | 116113235 | G    | G | A | A | G   | A |
| 6446 | rs6402721   | 2 | 116366906 | G    | G | G | A | G   | G |
| 6447 | rs3677413   | 2 | 116603199 | A    | G | A | G | G   | G |
| 6448 | rs3659529   | 2 | 116932359 | A    | A | G | A | A   | A |
| 6449 | rs6293684   | 2 | 117443289 | G    | A | A | A | A   | A |
| 6450 | rs3663941   | 2 | 117586672 | G    | A | A | G | A   | G |
| 6451 | rs3723406   | 2 | 117650393 | A    | C | C | A | C   | A |
| 6452 | rs3663325   | 2 | 117848215 | G    | A | A | G | A   | A |
| 6453 | rs3021887   | 2 | 117896802 | A    | A | A | C | A   | A |
| 6454 | rs8251603   | 2 | 117899091 | G    | G | G | G | G   | G |
| 6455 | rs6234992   | 2 | 117936685 | G    | A | A | A | A   | A |
| 6456 | rs3725853   | 2 | 118040554 | G    | G | G | A | G   | G |
| 6457 | rs3681225   | 2 | 118093938 | G    | G | G | A | G   | G |
| 6458 | rs3149842   | 2 | 118429359 | A    | A | A | G | A   | A |
| 6459 | rs3144393   | 2 | 118540348 | A    | A | A | G | A   | A |
| 6460 | rs3669388   | 2 | 118693853 | A    | A | A | C | A   | A |
| 6461 | rs4223410   | 2 | 118706142 | C    | C | C | A | C   | C |
| 6462 | rs6409590   | 2 | 118911998 | G    | G | G | G | G   | G |
| 6463 | rs8279354   | 2 | 118948317 | C    | C | C | A | C   | C |
| 6464 | rs8279382   | 2 | 118949228 | C    | C | C | A | C   | C |
| 6465 | rs8279381   | 2 | 118949380 | G    | G | G | G | G   | G |
| 6466 | rs3664735   | 2 | 119095870 | A    | A | A | G | A   | A |
| 6467 | rs3661254   | 2 | 119290749 | A/G  | G | G | A | A/G | G |
| 6468 | rs3654195   | 2 | 119323076 | A    | A | A | G | A   | A |
| 6469 | mCV24435431 | 2 | 121982984 | A    | A | A | G | A   | A |
| 6470 | mCV24435456 | 2 | 121983518 | C    | C | C | A | C   | C |
| 6471 | mCV24435464 | 2 | 121984177 | NONE | G | G | A | G   | G |
| 6472 | mCV24435726 | 2 | 121986964 | A    | G | G | G | G   | A |
| 6473 | mCV24435727 | 2 | 121987083 | G    | G | G | A | G   | G |
| 6474 | mCV24435745 | 2 | 121988534 | C    | C | C | A | C   | C |
| 6475 | mCV24435755 | 2 | 121988572 | G    | G | G | A | G   | G |
| 6476 | mCV24435757 | 2 | 121989975 | C    | A | A | C | A   | C |
| 6477 | mCV24435768 | 2 | 121990163 | A    | G | G | G | G   | A |
| 6478 | mCV24435769 | 2 | 121990165 | G    | A | A | G | A   | G |
| 6479 | mCV24435779 | 2 | 121994251 | G    | G | G | A | G   | G |
| 6480 | mCV24435780 | 2 | 121994419 | C    | A | A | C | A   | C |
| 6481 | mCV24435788 | 2 | 121994464 | G    | G | G | A | G   | G |
| 6482 | mCV24435789 | 2 | 121995966 | A    | G | G | A | G   | A |
| 6483 | mCV24435790 | 2 | 121996176 | A    | A | A | G | A   | A |
| 6484 | mCV24435797 | 2 | 121996454 | G    | G | G | A | G   | G |
| 6485 | mCV24435799 | 2 | 121997033 | G    | A | A | G | A   | G |
| 6486 | mCV24435806 | 2 | 121997034 | C    | G | G | C | G   | C |
| 6487 | mCV24435808 | 2 | 121997358 | G    | A | A | A | A   | G |
| 6488 | mCV24436076 | 2 | 121997523 | G    | G | G | A | G   | G |
| 6489 | mCV24436077 | 2 | 121997749 | G    | G | G | A | G   | G |
| 6490 | mCV24436085 | 2 | 121998740 | G    | A | A | G | A   | G |
| 6491 | mCV24436094 | 2 | 122000129 | A    | G | G | G | G   | A |
| 6492 | mCV24436095 | 2 | 122000246 | G    | G | G | C | G   | G |
| 6493 | mCV24436103 | 2 | 122001850 | G    | A | A | G | A   | G |
| 6494 | mCV24436111 | 2 | 122002650 | G    | G | G | A | G   | G |
| 6495 | mCV24436112 | 2 | 122002689 | A    | G | G | A | G   | A |
| 6496 | mCV24436118 | 2 | 122004098 | A    | G | G | G | G   | A |
| 6497 | mCV24436119 | 2 | 122004198 | A    | A | A | G | A   | A |
| 6498 | mCV24436127 | 2 | 122004487 | A    | G | G | A | G   | A |
| 6499 | mCV24436128 | 2 | 122006086 | A    | C | C | C | C   | A |
| 6500 | mCV24436136 | 2 | 122006228 | G    | G | G | A | G   | G |
| 6501 | mCV24436137 | 2 | 122006264 | G    | G | G | A | G   | G |
| 6502 | mCV24436145 | 2 | 122006644 | G    | G | G | A | G   | G |
| 6503 | mCV24436153 | 2 | 122007692 | A    | G | G | A | G   | A |
| 6504 | mCV24436430 | 2 | 122009602 | G    | G | G | C | G   | G |
| 6505 | mCV24436431 | 2 | 122009765 | G    | G | G | A | G   | G |
| 6506 | mCV24436432 | 2 | 122010165 | A    | A | A | G | A   | A |
| 6507 | mCV24436439 | 2 | 122010624 | A    | G | G | G | G   | A |
| 6508 | mCV24436440 | 2 | 122010774 | A    | G | G | A | G   | A |
| 6509 | mCV24436441 | 2 | 122010930 | G    | G | G | C | G   | G |



|      |             |   |           |   |     |   |   |     |   |
|------|-------------|---|-----------|---|-----|---|---|-----|---|
| 6510 | mCV24436451 | 2 | 122010971 | A | A   | A | C | A   | A |
| 6511 | mCV24436452 | 2 | 122011033 | G | G   | G | A | G   | G |
| 6512 | mCV24436453 | 2 | 122012347 | A | A   | A | G | A   | A |
| 6513 | mCV24436464 | 2 | 122012578 | A | A   | A | C | A   | A |
| 6514 | mCV24436475 | 2 | 122012672 | A | A   | A | G | A   | A |
| 6515 | mCV24436476 | 2 | 122012799 | C | C   | C | A | C   | C |
| 6516 | mCV24436487 | 2 | 122013481 | A | A   | A | G | A   | A |
| 6517 | rs8281185   | 2 | 120258386 | C | A   | C | A | A   | C |
| 6518 | rs8281186   | 2 | 120258424 | A | G   | G | G | G   | A |
| 6519 | rs8281377   | 2 | 120275930 | G | A   | G | G | A   | G |
| 6520 | rs4223427   | 2 | 120277878 | A | G   | A | G | G   | A |
| 6521 | rs4223428   | 2 | 120277888 | G | G   | G | A | G   | G |
| 6522 | rs3686905   | 2 | 120297295 | G | A   | G | A | A   | G |
| 6523 | rs6386814   | 2 | 120317874 | G | A   | G | A | A   | G |
| 6524 | rs6382013   | 2 | 120466676 | G | G   | G | G | G   | G |
| 6525 | rs3718386   | 2 | 120543620 | C | C   | C | A | C   | C |
| 6526 | rs3658927   | 2 | 120726441 | G | G   | G | A | G   | G |
| 6527 | rs4223432   | 2 | 120798314 | G | G   | G | A | G   | G |
| 6528 | rs6340352   | 2 | 121051368 | G | G   | G | A | G   | G |
| 6529 | rs3664905   | 2 | 121150448 | G | G   | G | A | G   | G |
| 6530 | rs6221401   | 2 | 121259260 | G | G   | G | A | G   | G |
| 6531 | rs3678620   | 2 | 121358519 | A | A   | A | G | A   | A |
| 6532 | rs6317255   | 2 | 121655084 | C | C/G | C | G | C/G | C |
| 6533 | rs3720647   | 2 | 122035039 | A | A   | A | G | A   | A |
| 6534 | rs3723643   | 2 | 122067606 | A | T   | T | A | T   | A |
| 6535 | rs3686617   | 2 | 122307094 | A | A   | A | G | A   | A |
| 6536 | rs4223435   | 2 | 122343595 | C | C   | C | C | C   | C |
| 6537 | rs3695790   | 2 | 122373260 | A | A   | A | G | A   | A |
| 6538 | rs3696744   | 2 | 122953766 | G | G   | G | A | G   | G |
| 6539 | rs3665194   | 2 | 123005585 | G | G   | G | C | G   | G |
| 6540 | rs6228179   | 2 | 123216313 | T | T   | T | A | T   | T |
| 6541 | rs6358300   | 2 | 123402037 | T | T   | T | A | T   | T |
| 6542 | rs4223437   | 2 | 123542609 | A | A   | A | A | A   | A |
| 6543 | rs6367262   | 2 | 123590756 | G | C   | G | C | C   | G |
| 6544 | rs3660713   | 2 | 124401843 | C | A   | C | A | A   | C |
| 6545 | rs3700391   | 2 | 124410352 | G | A   | G | A | A   | G |
| 6546 | rs4223441   | 2 | 124414038 | G | G   | G | G | G   | G |
| 6547 | rs4223442   | 2 | 124414075 | A | A   | A | A | A   | A |
| 6548 | rs6401493   | 2 | 125046796 | G | G   | G | A | A   | G |
| 6549 | rs3090980   | 2 | 125050441 | A | A   | A | A | A   | A |
| 6550 | rs8251633   | 2 | 125050789 | G | G   | G | G | G   | G |
| 6551 | rs8251635   | 2 | 125050910 | G | G   | A | A | A   | G |
| 6552 | rs6374387   | 2 | 125228072 | G | G   | A | G | A   | G |
| 6553 | rs8254510   | 2 | 125256258 | A | A   | G | A | G   | A |
| 6554 | rs8254506   | 2 | 125256382 | A | A   | A | A | A   | A |
| 6555 | rs3697020   | 2 | 125287975 | A | A   | G | G | G   | A |
| 6556 | rs3725315   | 2 | 125487965 | C | C   | A | C | A   | C |
| 6557 | rs3726517   | 2 | 125488175 | G | G   | A | G | A   | G |
| 6558 | rs3708635   | 2 | 125627822 | A | A   | C | A | C   | A |
| 6559 | rs3689994   | 2 | 125643040 | C | C   | G | C | G   | C |
| 6560 | rs3667348   | 2 | 125790202 | G | G   | G | A | G   | G |
| 6561 | rs3704471   | 2 | 125928983 | G | G   | G | A | G   | G |
| 6562 | rs3720259   | 2 | 126394107 | C | C   | G | C | G   | C |
| 6563 | rs6383064   | 2 | 126422907 | A | A   | G | A | G   | A |
| 6564 | rs4223448   | 2 | 126852461 | G | G   | A | G | A   | G |
| 6565 | rs4223452   | 2 | 126852555 | C | C   | C | C | C   | C |
| 6566 | rs3022899   | 2 | 127157623 | G | G   | G | A | G   | G |
| 6567 | rs4223462   | 2 | 127205583 | G | G   | A | G | A   | G |
| 6568 | rs3677705   | 2 | 127392250 | A | A   | G | A | G   | A |
| 6569 | rs3680660   | 2 | 127445593 | G | G   | A | G | A   | G |
| 6570 | rs3702207   | 2 | 127475850 | G | G   | A | G | A   | G |
| 6571 | rs6280404   | 2 | 127764256 | G | G   | A | G | A   | G |
| 6572 | rs6411422   | 2 | 128122514 | G | A   | G | A | G   | G |
| 6573 | rs6325084   | 2 | 128307025 | G | A   | G | A | G   | G |
| 6574 | rs4223474   | 2 | 128359324 | C | C   | C | C | C   | C |
| 6575 | rs3671147   | 2 | 128801145 | G | A   | G | A | G   | G |
| 6576 | rs3022901   | 2 | 128838999 | G | A   | G | A | G   | G |
| 6577 | rs3662407   | 2 | 128972497 | G | A   | G | A | G   | G |
| 6578 | rs6318992   | 2 | 129013077 | G | G   | A | G | G   | G |
| 6579 | rs3718550   | 2 | 129024115 | A | G   | A | G | G   | A |
| 6580 | rs3022902   | 2 | 129048776 | A | T   | A | T | A   | A |
| 6581 | mCV25034641 | 2 | 131410313 | G | G   | G | G | A   | G |
| 6582 | rs6161193   | 2 | 129466095 | C | A   | C | A | A   | C |
| 6583 | rs3655775   | 2 | 129583325 | A | A   | A | A | A   | A |

|      |             |   |           |   |   |   |   |   |   |
|------|-------------|---|-----------|---|---|---|---|---|---|
| 6584 | rs4223491   | 2 | 129851779 | G | G | G | G | G | G |
| 6585 | rs3661596   | 2 | 129893838 | G | A | G | A | A | G |
| 6586 | rs6188551   | 2 | 129907322 | C | A | C | A | A | C |
| 6587 | rs6397245   | 2 | 130273380 | G | A | G | A | A | G |
| 6588 | rs4223500   | 2 | 130457316 | A | A | G | A | A | G |
| 6589 | rs3665528   | 2 | 130762932 | G | G | A | G | G | A |
| 6590 | rs8264979   | 2 | 130800811 | C | C | C | C | C | C |
| 6591 | rs8264883   | 2 | 130805040 | G | G | G | G | G | G |
| 6592 | rs8264884   | 2 | 130805156 | G | G | G | G | A | G |
| 6593 | rs8264954   | 2 | 130807343 | A | A | A | A | G | A |
| 6594 | rs8264931   | 2 | 130810331 | G | G | G | G | A | G |
| 6595 | mCV22300686 | 2 | 132868150 | A | G | A | G | G | G |
| 6596 | rs3690254   | 2 | 131275700 | A | G | G | G | A | G |
| 6597 | rs6206689   | 2 | 131296031 | G | G | G | G | A | G |
| 6598 | rs4223510   | 2 | 131602703 | A | G | A | G | A | G |
| 6599 | rs4223511   | 2 | 131742558 | A | G | A | G | A | G |
| 6600 | rs6325260   | 2 | 131778700 | C | G | C | G | C | G |
| 6601 | rs3673192   | 2 | 131932284 | A | G | G | G | G | G |
| 6602 | rs3701463   | 2 | 132017400 | A | G | A | G | G | G |
| 6603 | rs3699051   | 2 | 132104826 | G | A | A | A | A | A |
| 6604 | rs3722210   | 2 | 132511317 | A | G | G | G | G | G |
| 6605 | rs6288723   | 2 | 132554606 | G | A | G | A | A | A |
| 6606 | rs3676388   | 2 | 133269555 | G | G | A | G | G | G |
| 6607 | rs3671635   | 2 | 133291360 | C | C | A | C | C | C |
| 6608 | rs3022934   | 2 | 133312250 | A | A | A | A | A | A |
| 6609 | rs3684247   | 2 | 133458369 | A | G | A | G | G | G |
| 6610 | rs6397401   | 2 | 133671460 | T | A | A | A | A | A |
| 6611 | rs3090353   | 2 | 133779335 | A | A | A | A | A | A |
| 6612 | rs3090709   | 2 | 134033983 | A | A | A | A | A | A |
| 6613 | rs6311917   | 2 | 134106307 | A | C | C | C | C | A |
| 6614 | rs3088678   | 2 | 135319740 | G | G | G | G | G | G |
| 6615 | rs6345820   | 2 | 135515842 | A | A | A | A | G | A |
| 6616 | rs4223539   | 2 | 135763696 | A | A | A | A | A | A |
| 6617 | rs4223537   | 2 | 135763908 | A | A | A | A | A | A |
| 6618 | mCV22322685 | 2 | 137943310 | A | C | C | C | C | C |
| 6619 | rs3682725   | 2 | 136072419 | A | T | T | A | A | A |
| 6620 | rs6234260   | 2 | 136147940 | T | T | T | T | T | T |
| 6621 | rs8246404   | 2 | 136627476 | A | G | G | G | G | G |
| 6622 | rs8246419   | 2 | 136629268 | G | A | A | A | A | A |
| 6623 | rs8237119   | 2 | 136629346 | G | A | A | A | A | A |
| 6624 | rs3710582   | 2 | 136636205 | G | A | A | A | A | A |
| 6625 | rs3710324   | 2 | 136973991 | A | G | G | G | G | G |
| 6626 | rs3686872   | 2 | 136996378 | A | G | G | G | G | G |
| 6627 | rs6329532   | 2 | 136997233 | A | C | C | C | C | C |
| 6628 | rs6249968   | 2 | 137541446 | G | A | A | A | A | A |
| 6629 | rs3673701   | 2 | 137550542 | C | A | A | A | A | A |
| 6630 | rs3726475   | 2 | 138320966 | T | T | T | A | T | T |
| 6631 | rs3090355   | 2 | 138449825 | G | G | G | G | G | G |
| 6632 | rs3653457   | 2 | 137893532 | C | A | A | A | A | A |
| 6633 | rs6282055   | 2 | 139481733 | A | A | A | A | G | A |
| 6634 | rs4223545   | 2 | 139507157 | A | A | A | A | G | A |
| 6635 | rs6251185   | 2 | 139669185 | G | G | G | G | A | G |
| 6636 | rs6187777   | 2 | 140873150 | A | A | A | A | C | A |
| 6637 | rs6397890   | 2 | 141701363 | A | A | A | A | G | A |
| 6638 | rs4223547   | 2 | 142368315 | A | A | A | A | A | A |
| 6639 | rs6331493   | 2 | 142453088 | G | G | G | G | A | G |
| 6640 | rs6195594   | 2 | 143346715 | A | G | A | A | G | A |
| 6641 | rs3022933   | 2 | 143565892 | A | G | G | G | A | G |
| 6642 | mCV22528930 | 2 | 143912661 | G | A | A | A | G | G |
| 6643 | rs3687229   | 2 | 143675138 | A | G | G | G | A | G |
| 6644 | rs3022911   | 2 | 143683969 | A | C | C | C | A | C |
| 6645 | rs3707946   | 2 | 143713082 | C | A | A | A | C | A |
| 6646 | rs3653569   | 2 | 143753206 | A | T | T | T | A | T |
| 6647 | mCV23169908 | 2 | 145638579 | A | G | G | A | A | G |
| 6648 | rs3655895   | 2 | 144285357 | G | A | A | A | G | G |
| 6649 | rs3661718   | 2 | 144562809 | G | A | A | A | G | G |
| 6650 | rs6170159   | 2 | 144736816 | A | G | G | G | A | G |
| 6651 | rs3022909   | 2 | 145033627 | G | A | A | A | G | A |
| 6652 | rs6184615   | 2 | 145073372 | A | G | G | G | A | G |
| 6653 | rs3679762   | 2 | 145359834 | G | A | A | A | G | A |
| 6654 | rs4135727   | 2 | 145796023 | A | C | C | A | A | C |
| 6655 | rs3674082   | 2 | 146043765 | A | T | T | A | A | T |
| 6656 | rs3676491   | 2 | 146044193 | A | C | C | A | A | C |
| 6657 | rs3713952   | 2 | 146061726 | A | G | G | A | A | G |

|      |             |    |           |      |   |      |   |   |   |
|------|-------------|----|-----------|------|---|------|---|---|---|
| 6658 | rs4223554   | 2  | 146314337 | T    | A | A    | T | T | A |
| 6659 | rs3668423   | 2  | 146391662 | A    | G | G    | A | A | G |
| 6660 | rs6254019   | 2  | 146451300 | A    | A | G    | A | A | G |
| 6661 | rs3724835   | 2  | 146807658 | A    | G | G    | A | A | G |
| 6662 | rs6392985   | 2  | 146962181 | A    | G | G    | A | A | G |
| 6663 | rs3697284   | 2  | 147080130 | C    | A | A    | C | C | A |
| 6664 | rs3701696   | 2  | 147181290 | A    | G | G    | A | A | G |
| 6665 | rs3696870   | 2  | 147404525 | G    | A | A    | G | A | G |
| 6666 | rs3683143   | 2  | 147534193 | T    | A | A    | T | T | A |
| 6667 | rs3088585   | 2  | 147590650 | NONE | A | A    | A | A | A |
| 6668 | rs3715085   | 2  | 147722042 | A    | G | G    | G | A | G |
| 6669 | rs6209325   | 2  | 147807884 | A    | G | G    | A | G | G |
| 6670 | rs4223557   | 2  | 148157081 | C    | C | A    | C | C | C |
| 6671 | rs3090368   | 2  | 148449402 | A    | A | A    | A | A | A |
| 6672 | rs6288803   | 2  | 148500685 | G    | C | C    | G | C | C |
| 6673 | rs8256617   | 2  | 148624491 | G    | A | A    | G | A | A |
| 6674 | rs8256618   | 2  | 148624497 | A    | A | A    | A | A | A |
| 6675 | rs8256619   | 2  | 148624531 | G    | G | G    | G | G | G |
| 6676 | rs3723883   | 2  | 148997446 | A    | G | G    | A | G | A |
| 6677 | rs3676033   | 2  | 149197838 | A    | T | T    | A | T | A |
| 6678 | mCV25337624 | 2  | 105399199 | G    | A | G    | G | A | G |
| 6679 | rs6206791   | 2  | 149418436 | G    | A | A    | G | A | A |
| 6680 | rs6174924   | 2  | 150080631 | G    | G | G    | G | G | G |
| 6681 | rs4223560   | 2  | 150466827 | G    | G | G    | G | G | G |
| 6682 | rs3704224   | 2  | 150964799 | A    | G | G    | G | G | G |
| 6683 | rs4223561   | 2  | 151780235 | G    | G | G    | G | G | G |
| 6684 | rs3662117   | 2  | 151898592 | G    | A | A    | A | A | A |
| 6685 | rs6268584   | 2  | 151914328 | G    | A | A    | A | A | A |
| 6686 | rs3717705   | 2  | 152160056 | G    | A | A    | A | A | A |
| 6687 | rs3660554   | 2  | 152160378 | G    | A | A    | A | A | A |
| 6688 | mCV25388133 | 18 | 43912167  | A    | A | G    | G | G | G |
| 6689 | rs3690044   | 2  | 152642436 | C    | C | A    | C | C | C |
| 6690 | rs3675388   | 2  | 152733387 | G    | A | G    | A | G | G |
| 6691 | rs4223567   | 2  | 153072689 | G    | G | G    | G | A | G |
| 6692 | rs4223564   | 2  | 153072983 | G    | G | A    | G | G | A |
| 6693 | rs6401794   | 2  | 153499988 | C    | A | C    | C | A | C |
| 6694 | rs4223571   | 2  | 153533945 | A    | G | A    | A | G | A |
| 6695 | rs3670553   | 2  | 153825745 | A    | G | G    | G | A | G |
| 6696 | rs3675650   | 2  | 154007610 | A    | G | A    | G | G | G |
| 6697 | rs3683092   | 2  | 154011636 | G    | G | G    | A | G | G |
| 6698 | rs6209403   | 2  | 154103561 | G    | A | A    | G | A | G |
| 6699 | rs6376291   | 2  | 154204634 | G    | G | C    | C | G | C |
| 6700 | mCV22991193 | 2  | 152402222 | C    | A | A    | A | A | A |
| 6701 | rs6291774   | 2  | 154609718 | A    | G | A    | A | G | A |
| 6702 | rs3712016   | 2  | 154694406 | A    | G | G    | A | G | A |
| 6703 | rs3684230   | 2  | 154787103 | G    | G | A    | G | G | A |
| 6704 | rs6248360   | 2  | 155015888 | G    | G | A    | G | G | A |
| 6705 | rs6300182   | 2  | 155018550 | G    | A | G    | A | A | G |
| 6706 | rs3687374   | 2  | 155127962 | G    | A | G    | A | A | G |
| 6707 | rs6315439   | 2  | 155253980 | G    | C | G    | C | C | G |
| 6708 | rs4223597   | 2  | 155765945 | A    | A | A    | A | A | A |
| 6709 | rs3665636   | 2  | 155779239 | A    | G | A    | G | G | A |
| 6710 | rs3089640   | 2  | 155799131 | C    | C | C    | C | C | C |
| 6711 | rs3668944   | 2  | 156039463 | G    | A | G    | A | A | G |
| 6712 | rs6304464   | 2  | 156147276 | G    | A | G    | A | A | G |
| 6713 | rs3677398   | 2  | 156156640 | G    | A | A    | A | A | A |
| 6714 | rs3703649   | 2  | 156532667 | A    | A | NONE | C | C | A |
| 6715 | rs3682465   | 2  | 156555563 | NONE | A | C    | A | A | C |
| 6716 | rs3662063   | 2  | 156681178 | A    | G | G    | G | G | G |
| 6717 | rs4223600   | 2  | 156844496 | G    | G | G    | G | G | G |
| 6718 | rs6265656   | 2  | 156927243 | C    | A | A    | A | C | A |
| 6719 | rs4223605   | 2  | 157059147 | C    | C | C    | C | G | C |
| 6720 | mCV23875187 | 2  | 154897120 | A    | G | A    | G | G | A |
| 6721 | rs3662665   | 2  | 157205479 | G    | G | A    | A | G | A |
| 6722 | rs4223625   | 2  | 157389223 | A    | A | A    | A | A | A |
| 6723 | rs6193859   | 2  | 157693960 | C    | C | A    | C | C | A |
| 6724 | rs3673974   | 2  | 157732398 | A    | A | A    | T | A | A |
| 6725 | rs3691210   | 2  | 158058573 | G    | G | G    | A | G | G |
| 6726 | rs3695266   | 2  | 158068522 | G    | A | G    | A | G | G |
| 6727 | rs6325935   | 2  | 158128000 | C    | A | A    | A | A | A |
| 6728 | rs8273810   | 2  | 158180064 | A    | A | A    | A | A | A |
| 6729 | rs8273783   | 2  | 158189095 | G    | A | G    | A | A | G |
| 6730 | rs8273805   | 2  | 158190672 | A    | A | A    | A | A | A |
| 6731 | rs8273702   | 2  | 158195389 | G    | G | G    | A | G | G |

|      |             |   |           |   |   |   |   |   |   |
|------|-------------|---|-----------|---|---|---|---|---|---|
| 6732 | rs8273730   | 2 | 158197123 | A | A | A | A | A | A |
| 6733 | rs3679337   | 2 | 159136088 | G | A | G | A | A | G |
| 6734 | rs3662897   | 2 | 159161905 | A | A | G | G | G | A |
| 6735 | rs6389365   | 2 | 159606339 | A | A | A | A | G | A |
| 6736 | rs3690797   | 2 | 159644358 | A | A | A | G | A | A |
| 6737 | rs3690841   | 2 | 159644389 | A | A | A | C | A | A |
| 6738 | rs3708176   | 2 | 159678385 | A | A | A | G | A | A |
| 6739 | rs3022937   | 2 | 159778523 | G | A | A | G | A | A |
| 6740 | rs3694708   | 2 | 160071391 | G | A | A | G | A | A |
| 6741 | rs3088716   | 2 | 160275083 | C | C | C | C | C | C |
| 6742 | rs6152944   | 2 | 160367044 | A | A | A | G | A | A |
| 6743 | rs4223635   | 2 | 160826325 | G | G | G | G | G | G |
| 6744 | rs3692409   | 2 | 160874526 | G | G | G | A | G | G |
| 6745 | rs3693259   | 2 | 161030557 | A | A | A | C | A | A |
| 6746 | rs3664408   | 2 | 161443571 | C | C | C | A | A | C |
| 6747 | rs3726342   | 2 | 161516368 | A | A | A | G | G | A |
| 6748 | rs3667162   | 2 | 161516447 | A | C | C | A | A | C |
| 6749 | rs3089768   | 2 | 161542258 | A | A | A | A | A | A |
| 6750 | rs3693685   | 2 | 161567042 | A | G | G | A | G | A |
| 6751 | rs6204920   | 2 | 161803720 | C | A | A | C | C | A |
| 6752 | rs6311474   | 2 | 162109008 | A | A | A | G | A | A |
| 6753 | rs6184747   | 2 | 162247673 | G | G | G | G | G | G |
| 6754 | rs3692104   | 2 | 162274799 | G | G | G | A | G | G |
| 6755 | rs3705202   | 2 | 162396274 | G | A | A | A | G | G |
| 6756 | rs3685730   | 2 | 162428763 | G | A | A | G | G | G |
| 6757 | mCV22653812 | 2 | 160483078 | G | C | C | C | C | C |
| 6758 | rs3673613   | 2 | 162915015 | G | G | G | A | A | A |
| 6759 | rs4223639   | 2 | 163000078 | A | A | A | A | A | A |
| 6760 | rs4223640   | 2 | 163000228 | C | C | C | C | C | C |
| 6761 | rs6233748   | 2 | 163039795 | C | A | A | A | A | A |
| 6762 | rs3671849   | 2 | 163215888 | G | C | C | G | C | G |
| 6763 | rs3089167   | 2 | 163417076 | G | G | G | G | G | G |
| 6764 | rs8260591   | 2 | 163798651 | G | A | A | A | A | A |
| 6765 | rs8260429   | 2 | 163815109 | A | T | T | A | T | A |
| 6766 | rs6345991   | 2 | 163870101 | G | G | G | A | G | G |
| 6767 | rs3697980   | 2 | 164075841 | A | A | A | G | G | G |
| 6768 | rs3696904   | 2 | 164212355 | G | A | A | A | A | A |
| 6769 | rs3696248   | 2 | 164421153 | A | A | G | A | G | G |
| 6770 | rs8275857   | 2 | 164437309 | C | C | C | G | C | C |
| 6771 | rs8275858   | 2 | 164437725 | C | G | C | C | C | C |
| 6772 | rs3675564   | 2 | 164453511 | A | A | A | G | A | A |
| 6773 | rs3695555   | 2 | 164525260 | A | G | A | A | A | A |
| 6774 | rs8269673   | 2 | 164895700 | G | G | G | G | G | G |
| 6775 | rs4223658   | 2 | 165011710 | G | G | G | G | G | G |
| 6776 | rs6185704   | 2 | 165016638 | G | A | A | G | A | A |
| 6777 | rs3089347   | 2 | 165275447 | A | A | A | A | A | A |
| 6778 | rs6177049   | 2 | 165845842 | G | G | G | A | G | G |
| 6779 | rs6338914   | 2 | 165855046 | A | G | G | A | G | G |
| 6780 | rs6218427   | 2 | 165965084 | G | G | G | A | G | G |
| 6781 | rs3712766   | 2 | 166073326 | G | G | G | A | G | G |
| 6782 | rs3653795   | 2 | 166693500 | C | G | G | G | C | G |
| 6783 | rs6311427   | 2 | 166736001 | A | G | G | G | A | G |
| 6784 | mCV24935609 | 2 | 164523944 | G | G | G | A | G | G |
| 6785 | mCV24935595 | 2 | 164525262 | A | G | A | A | A | A |
| 6786 | mCV24935594 | 2 | 164525874 | C | A | C | A | C | C |
| 6787 | mCV24935590 | 2 | 164526607 | G | A | G | G | G | G |
| 6788 | mCV24935589 | 2 | 164527691 | C | C | C | C | C | C |
| 6789 | mCV24935588 | 2 | 164528155 | A | C | A | A | A | A |
| 6790 | mCV24935319 | 2 | 164528642 | T | A | T | A | T | T |
| 6791 | mCV24935318 | 2 | 164528750 | A | G | A | G | A | A |
| 6792 | mCV24935310 | 2 | 164528773 | G | G | G | C | G | G |
| 6793 | rs4223755   | 2 | 167559729 | G | G | G | G | G | G |
| 6794 | rs3702038   | 2 | 167039415 | A | G | G | G | G | G |
| 6795 | rs6219107   | 2 | 167539095 | A | A | A | A | G | G |
| 6796 | rs4223671   | 2 | 168599446 | G | G | G | G | G | G |
| 6797 | rs4223675   | 2 | 168811879 | A | A | A | A | A | A |
| 6798 | rs4223674   | 2 | 168812009 | C | C | C | C | C | C |
| 6799 | rs3708726   | 2 | 168991552 | G | G | G | A | G | G |
| 6800 | rs6160839   | 2 | 169029804 | G | A | G | A | G | A |
| 6801 | rs3714936   | 2 | 169150057 | G | A | G | A | G | G |
| 6802 | rs3656991   | 2 | 169266292 | A | G | A | G | A | A |
| 6803 | rs3689258   | 2 | 169551018 | A | G | A | G | A | A |
| 6804 | rs6306203   | 2 | 169569355 | A | G | A | G | A | A |
| 6805 | rs3663663   | 2 | 169707976 | C | C | C | A | C | C |

|      |             |   |           |      |   |   |   |   |   |
|------|-------------|---|-----------|------|---|---|---|---|---|
| 6806 | rs3726974   | 2 | 169905098 | A    | A | A | C | A | A |
| 6807 | rs3143886   | 2 | 170023409 | A    | A | A | G | A | A |
| 6808 | rs3142729   | 2 | 170176233 | A    | A | A | C | A | A |
| 6809 | rs6175692   | 2 | 171375396 | G    | G | G | G | G | G |
| 6810 | rs3703438   | 2 | 171460563 | G    | G | G | A | G | G |
| 6811 | rs3724618   | 2 | 171587659 | G    | G | G | A | G | G |
| 6812 | rs3677660   | 2 | 171734162 | T    | T | T | A | T | T |
| 6813 | rs3665916   | 2 | 171800911 | A    | G | A | G | A | G |
| 6814 | rs3681347   | 2 | 171809050 | G    | A | A | A | G | A |
| 6815 | rs3672061   | 2 | 172285289 | A    | A | A | G | A | G |
| 6816 | rs4223683   | 2 | 172419557 | A    | A | A | A | A | A |
| 6817 | rs4223681   | 2 | 172419739 | G    | G | G | G | G | G |
| 6818 | rs3668691   | 2 | 172801637 | G    | G | G | C | G | G |
| 6819 | rs3681553   | 2 | 172847586 | A    | A | A | G | A | A |
| 6820 | rs4223689   | 2 | 173003083 | G    | G | G | G | G | G |
| 6821 | rs3673248   | 2 | 173087906 | G    | G | G | A | G | G |
| 6822 | rs3673347   | 2 | 173087963 | A    | A | A | G | A | A |
| 6823 | rs6384888   | 2 | 173614022 | A    | A | C | A | C | C |
| 6824 | mCV24846159 | 2 | 171087115 | A    | A | A | A | A | C |
| 6825 | rs3664044   | 2 | 173671254 | G    | G | G | C | G | G |
| 6826 | rs3668345   | 2 | 173714429 | A    | A | G | G | G | G |
| 6827 | rs4223695   | 2 | 173846338 | A    | A | A | A | A | A |
| 6828 | rs8238755   | 2 | 174485975 | G    | G | A | A | A | A |
| 6829 | mCV23614425 | 2 | 174313677 | G    | G | A | A | A | A |
| 6830 | rs6265399   | 2 | 177931595 | A    | A | A | A | A | A |
| 6831 | rs3674193   | 2 | 178405527 | C    | C | C | A | C | C |
| 6832 | rs6193482   | 2 | 178499082 | A    | A | G | G | G | G |
| 6833 | rs6335805   | 2 | 178967205 | A    | A | A | G | A | G |
| 6834 | rs4139310   | 2 | 178967735 | G    | G | G | A | G | A |
| 6835 | rs6187766   | 2 | 179210967 | G    | G | G | A | G | A |
| 6836 | rs3703298   | 2 | 179649104 | C    | C | C | G | C | C |
| 6837 | rs3719336   | 2 | 179669991 | A    | A | G | G | G | A |
| 6838 | rs3673139   | 2 | 179722432 | NONE | A | G | G | G | A |
| 6839 | rs4223698   | 2 | 179787855 | G    | G | G | G | G | G |
| 6840 | rs3679483   | 2 | 179814463 | G    | G | G | A | G | G |
| 6841 | rs6310525   | 2 | 180550141 | A    | G | G | A | G | G |
| 6842 | rs3699297   | 2 | 180685302 | A    | C | C | C | C | C |
| 6843 | rs6305540   | 2 | 180779087 | A    | G | G | A | G | A |
| 6844 | rs4223701   | 2 | 181204511 | G    | C | C | G | C | G |
| 6845 | rs3655467   | 2 | 181209934 | T    | A | A | T | A | T |
| 6846 | rs8237215   | 2 | 181407046 | G    | G | G | G | G | G |
| 6847 | rs8237216   | 2 | 181407118 | A    | A | A | A | A | A |
| 6848 | rs8237217   | 2 | 181407250 | G    | G | G | G | G | G |
| 6849 | rs8238464   | 2 | 181408057 | G    | A | A | G | A | G |
| 6850 | rs8238465   | 2 | 181408146 | G    | A | A | G | A | G |
| 6851 | rs3022946   | 2 | 181408390 | A    | G | G | A | G | A |
| 6852 | rs6402916   | 2 | 181495642 | G    | G | G | A | G | A |
| 6853 | rs3708442   | 1 | 192239167 | G    | G | G | A | G | G |
| 6854 | rs3708508   | 1 | 192239190 | A    | A | A | G | A | A |
| 6855 | rs6171250   | 3 | 3022116   | A    | A | A | A | A | A |
| 6856 | mCV23626472 | 3 | 6472940   | A    | C | C | A | C | C |
| 6857 | rs6266594   | 3 | 3861987   | A    | A | A | A | A | A |
| 6858 | mCV25454657 | 3 | 7102640   | G    | G | G | G | A | A |
| 6859 | rs3694661   | 3 | 4302966   | C    | C | C | C | C | C |
| 6860 | rs6175498   | 3 | 4586214   | C    | C | C | C | C | C |
| 6861 | rs6191235   | 3 | 5002439   | A    | A | A | A | A | A |
| 6862 | rs3675711   | 3 | 5621317   | A    | G | G | A | A | A |
| 6863 | rs6316429   | 3 | 5716359   | A    | T | T | A | A | A |
| 6864 | mCV23610475 | 3 | 9025918   | G    | A | A | G | G | G |
| 6865 | rs6247681   | 3 | 5934431   | A    | G | G | A | A | A |
| 6866 | rs6219934   | 3 | 7067099   | G    | G | G | G | G | G |
| 6867 | rs6343366   | 3 | 7320522   | A    | A | A | A | A | A |
| 6868 | rs3689073   | 3 | 7408795   | A    | C | C | A | C | C |
| 6869 | rs3689138   | 3 | 7408829   | G    | A | A | G | A | A |
| 6870 | rs4223705   | 3 | 7575117   | T    | T | T | T | T | T |
| 6871 | rs4223706   | 3 | 7575156   | A    | G | G | A | G | G |
| 6872 | rs8246989   | 3 | 7638183   | A    | G | G | A | G | G |
| 6873 | rs8246984   | 3 | 7638311   | C    | C | C | C | A | A |
| 6874 | rs6403649   | 3 | 8016537   | A    | A | A | A | A | A |
| 6875 | rs3089579   | 3 | 8348971   | A    | A | A | A | A | A |
| 6876 | rs4223709   | 3 | 8596863   | A    | G | G | A | A | A |
| 6877 | rs8246926   | 3 | 8703710   | A    | A | A | A | A | A |
| 6878 | rs4223711   | 3 | 8840343   | A    | A | A | A | A | A |
| 6879 | rs6397899   | 3 | 9044696   | A    | A | A | A | A | A |

|      |             |   |          |   |     |   |   |     |     |
|------|-------------|---|----------|---|-----|---|---|-----|-----|
| 6880 | rs3701904   | 3 | 9535129  | G | A   | A | G | A   | G   |
| 6881 | rs6270460   | 3 | 9816746  | A | A   | A | A | A   | A   |
| 6882 | rs3719352   | 3 | 10752146 | A | A   | A | G | A   | A   |
| 6883 | rs6368632   | 3 | 10819828 | G | G   | G | A | G   | G   |
| 6884 | rs6322092   | 3 | 10973122 | G | G   | G | G | G   | G   |
| 6885 | rs6230946   | 3 | 11159401 | A | A   | A | A | A   | A   |
| 6886 | rs3703706   | 3 | 11360137 | A | A   | A | G | A   | A   |
| 6887 | mCV25445157 | 3 | 15128651 | C | C   | C | C | A   | C   |
| 6888 | rs3713697   | 3 | 11888990 | A | A   | A | G | G   | A   |
| 6889 | rs6408490   | 3 | 12212983 | A | A/G | A | A | A/G | A/G |
| 6890 | rs3694133   | 3 | 12562659 | T | T   | T | A | A   | A   |
| 6891 | rs3716641   | 3 | 12564058 | A | A   | A | G | G   | G   |
| 6892 | rs6351478   | 3 | 12626499 | C | G   | G | G | C   | G   |
| 6893 | rs6193496   | 3 | 13096281 | A | A   | A | A | A   | A   |
| 6894 | rs3657571   | 3 | 13192503 | T | A   | A | A | T   | A   |
| 6895 | rs3674446   | 3 | 13818754 | A | G   | G | G | A   | G   |
| 6896 | rs4223739   | 3 | 13907061 | C | C   | C | C | C   | C   |
| 6897 | rs3721276   | 3 | 14434508 | G | A   | A | A | A   | A   |
| 6898 | mCV22614242 | 3 | 17286400 | G | G   | G | A | G   | G   |
| 6899 | rs3022949   | 3 | 14707885 | G | G   | G | G | A   | G   |
| 6900 | rs4223742   | 3 | 14956131 | C | C   | C | C | C   | C   |
| 6901 | rs6191305   | 3 | 15185752 | A | A   | A | A | A   | A   |
| 6902 | rs6354267   | 3 | 15298021 | A | A   | A | A | A   | A   |
| 6903 | mCV24712981 | 3 | 18230578 | A | G   | G | A | G   | A   |
| 6904 | rs3688496   | 3 | 15375240 | G | A   | A | G | A   | A   |
| 6905 | rs6235756   | 3 | 15676691 | A | G   | G | A | G   | G   |
| 6906 | mCV24211562 | 3 | 18932166 | A | A   | A | A | G   | A   |
| 6907 | rs3659988   | 3 | 16122429 | A | G   | G | A | G   | G   |
| 6908 | rs4138128   | 3 | 16536069 | A | G   | G | G | G   | G   |
| 6909 | rs6379358   | 3 | 16573559 | G | A   | A | A | A   | A   |
| 6910 | rs6345660   | 3 | 16834103 | A | A   | A | C | A   | A   |
| 6911 | rs3666486   | 3 | 16836912 | G | G   | G | A | G   | G   |
| 6912 | rs6195996   | 3 | 17430540 | T | A   | A | A | A   | T   |
| 6913 | rs4223753   | 3 | 17447037 | T | T   | T | T | T   | T   |
| 6914 | rs4223752   | 3 | 17447048 | G | A   | A | A | A   | G   |
| 6915 | rs3664315   | 3 | 17466555 | G | A   | A | A | A   | G   |
| 6916 | rs3696263   | 3 | 17524518 | A | T   | T | A | T   | A   |
| 6917 | rs3689046   | 3 | 17762562 | G | G   | G | C | G   | G   |
| 6918 | rs3669876   | 3 | 18932029 | A | G   | G | A | G   | A   |
| 6919 | mCV24730919 | 3 | 19343842 | A | A   | A | A | T   | T   |
| 6920 | rs3674030   | 3 | 19358916 | G | C   | C | C | G   | C   |
| 6921 | rs6410894   | 3 | 19505679 | G | G   | G | A | A   | A   |
| 6922 | rs6355775   | 3 | 19809047 | C | C   | C | C | C   | C   |
| 6923 | rs3090498   | 3 | 19889829 | C | C   | C | C | C   | C   |
| 6924 | rs3698422   | 3 | 20496779 | A | A   | A | C | A   | A   |
| 6925 | rs6321395   | 3 | 20543384 | G | G   | G | A | G   | G   |
| 6926 | rs3677150   | 3 | 20698890 | A | A   | A | G | G   | G   |
| 6927 | rs6235984   | 3 | 21215374 | A | A   | A | A | T   | T   |
| 6928 | rs6204524   | 3 | 21900163 | G | G   | G | G | G   | G   |
| 6929 | rs6289789   | 3 | 23207671 | G | G   | G | G | G   | G   |
| 6930 | rs6356704   | 3 | 23217363 | G | G   | G | G | G   | G   |
| 6931 | rs6167490   | 3 | 24525160 | G | G   | G | G | G   | G   |
| 6932 | rs6197072   | 3 | 24756319 | G | G   | G | G | G   | G   |
| 6933 | rs3710311   | 3 | 25335993 | A | A   | A | A | A   | A   |
| 6934 | rs6373308   | 3 | 25959361 | A | A   | A | G | A   | A   |
| 6935 | rs3698991   | 3 | 26097422 | G | G   | G | A | G   | G   |
| 6936 | rs3724098   | 3 | 26147418 | A | G   | G | A | G   | G   |
| 6937 | rs3715834   | 3 | 26405124 | G | G   | G | A | A   | A   |
| 6938 | rs3670738   | 3 | 27090632 | G | A   | A | G | G   | G   |
| 6939 | rs6289732   | 3 | 27135045 | A | C   | C | A | A   | A   |
| 6940 | rs4223769   | 3 | 27181895 | A | G   | G | A | A   | A   |
| 6941 | rs3661152   | 3 | 27508283 | A | C   | C | A | A   | A   |
| 6942 | rs3677132   | 3 | 27684663 | G | G   | G | A | A   | A   |
| 6943 | rs3700087   | 3 | 27740855 | G | G   | G | A | G   | G   |
| 6944 | rs8247032   | 3 | 27896885 | G | G   | G | G | G   | G   |
| 6945 | rs4223791   | 3 | 27898429 | G | G   | G | G | G   | G   |
| 6946 | rs4223797   | 3 | 28435640 | A | A   | A | A | A   | A   |
| 6947 | rs6260196   | 3 | 28495137 | A | T   | T | A | T   | A   |
| 6948 | rs6258396   | 3 | 28833451 | A | G   | G | A | G   | A   |
| 6949 | rs2020463   | 3 | 28883323 | A | G   | G | A | G   | G   |
| 6950 | rs4223804   | 3 | 29022447 | A | A   | A | A | A   | A   |
| 6951 | rs3653514   | 3 | 29295055 | C | G   | G | C | C   | C   |
| 6952 | rs6400008   | 3 | 29581930 | G | A   | A | G | G   | A   |
| 6953 | rs3660588   | 3 | 30094761 | A | G   | G | A | A   | G   |

|      |             |   |          |   |   |   |   |      |      |
|------|-------------|---|----------|---|---|---|---|------|------|
| 6954 | rs6228571   | 3 | 30095717 | C | A | A | C | C    | A    |
| 6955 | rs3686996   | 3 | 30149129 | A | A | A | A | A    | G    |
| 6956 | rs4223832   | 3 | 30586739 | A | A | A | A | A    | A    |
| 6957 | rs3023779   | 3 | 30888857 | A | A | A | A | A    | A    |
| 6958 | rs6303076   | 3 | 31596188 | G | G | G | G | G    | G    |
| 6959 | rs3661905   | 3 | 31634928 | A | A | A | T | A    | A    |
| 6960 | rs6218317   | 3 | 31657743 | A | A | A | G | A    | A    |
| 6961 | rs3702402   | 3 | 31969604 | C | A | A | C | C    | A    |
| 6962 | rs6351323   | 3 | 32246505 | T | A | A | T | T    | T    |
| 6963 | rs3663409   | 3 | 32363960 | G | G | G | A | G    | G    |
| 6964 | rs4223865   | 3 | 32726880 | A | A | A | A | A    | A    |
| 6965 | rs4223864   | 3 | 32726887 | G | G | G | A | A    | G    |
| 6966 | rs3711011   | 3 | 32731896 | G | A | A | G | G    | G    |
| 6967 | rs6332819   | 3 | 32774568 | G | A | A | G | G    | G    |
| 6968 | rs3687193   | 3 | 32806508 | A | G | G | A | A    | A    |
| 6969 | rs3695308   | 3 | 33494366 | G | G | G | A | G    | G    |
| 6970 | rs4223871   | 3 | 33604793 | T | T | T | T | T    | T    |
| 6971 | rs3664070   | 3 | 33708015 | C | C | C | A | C    | C    |
| 6972 | rs4223883   | 3 | 33860283 | G | A | A | A | G    | G    |
| 6973 | rs6371982   | 3 | 33929993 | C | C | C | A | A    | A    |
| 6974 | rs6219246   | 3 | 34705660 | A | G | G | A | A    | G    |
| 6975 | rs6305300   | 3 | 34854172 | C | A | A | C | C    | A    |
| 6976 | rs3701286   | 3 | 35038794 | C | A | A | C | C    | A    |
| 6977 | rs3660816   | 3 | 35371021 | C | G | G | G | C    | NONE |
| 6978 | rs3702496   | 3 | 35470885 | C | C | C | A | NONE | C    |
| 6979 | rs3720738   | 3 | 35779420 | A | G | G | A | A    | G    |
| 6980 | rs4223924   | 3 | 36010945 | A | A | A | A | A    | A    |
| 6981 | rs6246699   | 3 | 36110851 | G | G | G | A | A    | G    |
| 6982 | rs3151902   | 3 | 36405733 | A | A | A | G | A    | G    |
| 6983 | rs3146358   | 3 | 36664127 | G | G | G | A | G    | A    |
| 6984 | rs3146315   | 3 | 36682882 | G | G | G | A | G    | A    |
| 6985 | rs3151196   | 3 | 36739421 | A | A | A | G | A    | G    |
| 6986 | rs3162526   | 3 | 37242071 | G | G | G | A | G    | A    |
| 6987 | rs3721455   | 3 | 37398597 | G | A | A | G | G    | G    |
| 6988 | rs6260262   | 3 | 37707494 | G | G | G | G | G    | G    |
| 6989 | rs3705939   | 3 | 37949126 | A | A | A | G | A    | G    |
| 6990 | rs3670471   | 3 | 38477365 | A | A | A | C | A    | C    |
| 6991 | rs6274061   | 3 | 38689460 | A | A | A | G | A    | G    |
| 6992 | mCV24811501 | 3 | 43098164 | A | C | C | A | A    | A    |
| 6993 | rs6257041   | 3 | 38888412 | A | A | A | C | C    | A    |
| 6994 | rs3665109   | 3 | 39623689 | G | A | A | A | G    | A    |
| 6995 | rs3714497   | 3 | 39696714 | G | G | G | A | G    | G    |
| 6996 | rs6324747   | 3 | 39835273 | G | A | G | A | G    | G    |
| 6997 | rs3701719   | 3 | 41684309 | G | A | A | G | G    | G    |
| 6998 | rs4223937   | 3 | 41769353 | G | G | G | G | G    | G    |
| 6999 | rs6318748   | 3 | 41801897 | G | A | A | G | G    | A    |
| 7000 | rs4223942   | 3 | 40570547 | C | C | C | C | C    | C    |
| 7001 | rs3712832   | 3 | 40848437 | G | G | G | A | G    | G    |
| 7002 | mCV24401139 | 3 | 46173120 | A | G | A | A | G    | G    |
| 7003 | rs3725706   | 3 | 41575201 | A | A | A | G | A    | A    |
| 7004 | rs3723018   | 3 | 41705800 | A | G | G | G | A    | G    |
| 7005 | rs3661720   | 3 | 41838640 | G | A | A | A | G    | A    |
| 7006 | rs6374301   | 3 | 41937597 | A | T | T | T | A    | T    |
| 7007 | rs6235368   | 3 | 42029401 | A | A | A | A | A    | A    |
| 7008 | rs3699423   | 3 | 42115367 | G | C | C | G | G    | C    |
| 7009 | rs3670626   | 3 | 42241608 | T | A | A | A | T    | A    |
| 7010 | rs3711327   | 3 | 42365259 | A | G | G | G | A    | G    |
| 7011 | rs6316149   | 3 | 42484676 | T | T | T | T | T    | T    |
| 7012 | rs3725189   | 3 | 42860293 | G | A | A | G | G    | G    |
| 7013 | rs6188525   | 3 | 42993741 | A | G | G | A | A    | A    |
| 7014 | rs6371266   | 3 | 43428882 | T | T | T | T | T    | T    |
| 7015 | rs6346011   | 3 | 43511801 | A | G | G | A | A    | A    |
| 7016 | rs4223947   | 3 | 43704216 | C | A | A | C | C    | C    |
| 7017 | rs4223948   | 3 | 43704239 | T | A | A | T | T    | T    |
| 7018 | rs3722463   | 3 | 44019288 | A | G | G | A | A    | A    |
| 7019 | rs3667394   | 3 | 44381554 | A | G | G | A | A    | G    |
| 7020 | rs6248252   | 3 | 44579002 | A | T | T | A | A    | T    |
| 7021 | mCV24847225 | 3 | 49440897 | G | A | A | G | A    | A    |
| 7022 | rs6327630   | 3 | 45054035 | A | G | G | A | A    | A    |
| 7023 | rs3725268   | 3 | 45055169 | T | A | A | T | T    | T    |
| 7024 | rs3707139   | 3 | 45848324 | G | A | A | G | G    | G    |
| 7025 | rs6191141   | 3 | 45861226 | A | G | G | A | A    | A    |
| 7026 | rs3684206   | 3 | 45885563 | A | G | G | A | A    | A    |
| 7027 | rs6189053   | 3 | 46943543 | A | A | A | A | A    | A    |

|      |             |   |          |   |   |   |   |   |   |
|------|-------------|---|----------|---|---|---|---|---|---|
| 7028 | mCV24650374 | 3 | 48720060 | T | A | A | A | A | T |
| 7029 | rs6205286   | 3 | 47789143 | G | C | C | G | C | C |
| 7030 | rs3667675   | 3 | 47853066 | C | A | A | C | A | A |
| 7031 | rs3687414   | 3 | 47853961 | C | G | G | C | G | G |
| 7032 | mCV23376784 | 3 | 52590325 | G | G | A | A | A | G |
| 7033 | rs3691363   | 3 | 48065869 | C | A | A | C | A | A |
| 7034 | rs3678630   | 3 | 48189374 | A | G | G | A | G | G |
| 7035 | rs3681246   | 3 | 48189759 | A | C | C | A | C | C |
| 7036 | rs3670072   | 3 | 48641016 | A | G | G | A | G | G |
| 7037 | rs6300615   | 3 | 48932481 | A | C | C | A | C | C |
| 7038 | mCV22818381 | 3 | 53753953 | G | G | G | G | A | A |
| 7039 | rs6381292   | 3 | 49706571 | G | G | G | G | G | G |
| 7040 | rs3714309   | 3 | 49710839 | G | A | A | G | A | A |
| 7041 | rs3707464   | 3 | 49772353 | A | G | G | A | G | G |
| 7042 | rs3671459   | 3 | 50142982 | G | A | G | G | A | A |
| 7043 | rs4223949   | 3 | 50384342 | A | A | A | A | A | A |
| 7044 | rs3022958   | 3 | 50421328 | G | A | G | G | G | A |
| 7045 | rs3022956   | 3 | 50450447 | A | A | A | A | C | A |
| 7046 | rs3089298   | 3 | 50450529 | G | A | A | G | A | A |
| 7047 | rs6367189   | 3 | 50453893 | A | T | G | A | T | T |
| 7048 | rs4139913   | 3 | 50623988 | G | A | G | G | A | A |
| 7049 | rs3724545   | 3 | 50776152 | G | A | A | G | A | A |
| 7050 | rs3657939   | 3 | 50781075 | A | G | G | A | G | G |
| 7051 | rs6327143   | 3 | 50872034 | A | G | G | A | G | G |
| 7052 | rs3689832   | 3 | 51352183 | G | A | G | A | A | G |
| 7053 | rs3719360   | 3 | 51328183 | G | A | G | A | A | G |
| 7054 | rs6222857   | 3 | 51422976 | G | C | G | C | C | G |
| 7055 | rs3694611   | 3 | 51636182 | A | C | A | C | C | A |
| 7056 | rs8257976   | 3 | 52430836 | A | A | A | A | A | A |
| 7057 | rs8257977   | 3 | 52431400 | G | G | G | G | G | G |
| 7058 | rs6241331   | 3 | 52675823 | G | G | A | A | A | G |
| 7059 | mCV22953681 | 3 | 57445834 | T | A | T | T | A | A |
| 7060 | rs3685081   | 3 | 52790137 | G | G | G | A | A | A |
| 7061 | rs3718812   | 3 | 52887282 | A | A | A | G | G | G |
| 7062 | rs3674296   | 3 | 53019876 | G | G | G | A | A | A |
| 7063 | rs6335414   | 3 | 53103565 | G | A | G | A | A | A |
| 7064 | rs3665395   | 3 | 53339892 | A | A | G | A | A | A |
| 7065 | rs3714799   | 3 | 53346250 | C | C | A | C | C | C |
| 7066 | rs6272868   | 3 | 53597983 | A | A | A | A | A | A |
| 7067 | rs6324464   | 3 | 54392652 | T | T | T | T | T | T |
| 7068 | rs4223969   | 3 | 55143939 | A | A | C | A | C | C |
| 7069 | rs4223971   | 3 | 55144141 | A | A | C | A | C | C |
| 7070 | rs4223974   | 3 | 55144223 | A | A | A | A | A | A |
| 7071 | rs6235901   | 3 | 55254969 | T | T | T | T | T | T |
| 7072 | rs6337816   | 3 | 55273163 | G | G | G | G | G | G |
| 7073 | rs6319642   | 3 | 56600936 | G | G | G | G | A | A |
| 7074 | rs4223977   | 3 | 57569127 | A | G | A | A | G | G |
| 7075 | rs6363066   | 3 | 57943185 | G | A | G | G | A | A |
| 7076 | rs6301139   | 3 | 58612475 | A | T | T | A | T | A |
| 7077 | rs6342158   | 3 | 59334595 | A | G | A | A | A | G |
| 7078 | rs3680871   | 3 | 59376091 | G | A | A | A | A | G |
| 7079 | mCV24528954 | 3 | 64169802 | G | A | G | G | A | A |
| 7080 | rs3723181   | 3 | 59440244 | A | C | A | C | C | A |
| 7081 | rs3691114   | 3 | 59986297 | G | A | G | A | A | G |
| 7082 | rs3676098   | 3 | 60164656 | A | A | A | G | G | A |
| 7083 | rs3667772   | 3 | 60329358 | A | A | A | G | G | A |
| 7084 | rs6234223   | 3 | 60330036 | A | A | A | G | G | A |
| 7085 | rs3719696   | 3 | 60434800 | G | G | G | A | A | G |
| 7086 | rs3715395   | 3 | 60447224 | T | T | T | A | A | T |
| 7087 | rs6239288   | 3 | 60673679 | C | A | C | A | A | C |
| 7088 | rs4223979   | 3 | 60713909 | G | A | G | A | A | G |
| 7089 | rs3706317   | 3 | 61254092 | C | C | A | C | C | C |
| 7090 | rs6326241   | 3 | 61758413 | A | A | A | A | C | A |
| 7091 | rs3656374   | 3 | 61779434 | C | G | C | G | G | G |
| 7092 | rs3672242   | 3 | 61890751 | A | G | A | G | G | A |
| 7093 | rs3662143   | 3 | 61942195 | G | A | A | A | A | G |
| 7094 | rs3672601   | 3 | 61972258 | A | G | G | G | G | A |
| 7095 | rs3700657   | 3 | 62104317 | G | A | A | A | A | G |
| 7096 | rs6176848   | 3 | 62234752 | A | C | C | A | C | A |
| 7097 | rs3672384   | 3 | 63027357 | C | A | A | A | A | A |
| 7098 | rs3696955   | 3 | 63295533 | G | A | A | G | G | G |
| 7099 | rs3710506   | 3 | 63415447 | G | A | A | A | G | G |
| 7100 | rs3722255   | 3 | 63484408 | A | G | A | G | A | A |
| 7101 | rs6326655   | 3 | 63500902 | A | C | C | C | A | A |



|      |             |   |          |   |   |   |   |   |   |
|------|-------------|---|----------|---|---|---|---|---|---|
| 7102 | rs3715851   | 3 | 63549909 | C | C | A | C | C | C |
| 7103 | mCV24530618 | 3 | 64630281 | G | G | G | G | A | G |
| 7104 | rs6212539   | 3 | 65222079 | A | C | C | C | A | A |
| 7105 | rs3671859   | 3 | 65449616 | G | A | A | A | A | A |
| 7106 | rs3091173   | 3 | 65615087 | A | A | A | A | A | A |
| 7107 | rs3674751   | 3 | 65909192 | A | G | A | A | G | G |
| 7108 | rs3718995   | 3 | 66265244 | A | A | A | A | A | G |
| 7109 | rs6224355   | 3 | 66327900 | G | G | G | G | G | G |
| 7110 | mCV25201949 | 3 | 70971737 | C | C | C | G | C | C |
| 7111 | rs3707121   | 3 | 66710305 | G | G | G | G | G | C |
| 7112 | rs6320689   | 3 | 67249780 | A | A | A | A | A | A |
| 7113 | rs6226544   | 3 | 67856811 | A | A | A | A | A | G |
| 7114 | rs6342742   | 3 | 68204212 | G | G | G | G | G | G |
| 7115 | rs3089698   | 3 | 68260396 | G | G | G | G | G | G |
| 7116 | rs6350199   | 3 | 68393024 | G | G | G | G | G | G |
| 7117 | rs3674810   | 3 | 68455356 | A | A | A | G | A | A |
| 7118 | rs3678419   | 3 | 68520434 | G | G | G | A | G | G |
| 7119 | rs8259022   | 3 | 69032650 | A | A | A | A | A | A |
| 7120 | rs8259028   | 3 | 69032970 | A | A | A | A | A | A |
| 7121 | rs8259038   | 3 | 69033146 | G | G | G | G | G | G |
| 7122 | rs4223988   | 3 | 69374806 | G | G | G | G | G | G |
| 7123 | rs3715204   | 3 | 69444709 | G | A | A | G | A | G |
| 7124 | rs6243018   | 3 | 69843132 | G | G | G | G | G | G |
| 7125 | rs3654911   | 3 | 69882294 | G | G | G | A | G | G |
| 7126 | rs6198234   | 3 | 70361430 | G | A | G | A | A | G |
| 7127 | rs3714575   | 3 | 70391230 | T | A | T | A | A | T |
| 7128 | rs6386080   | 3 | 70778538 | G | G | G | G | G | G |
| 7129 | rs3659459   | 3 | 70978751 | T | T | T | A | T | T |
| 7130 | rs3659688   | 3 | 71191410 | G | G | G | C | G | G |
| 7131 | rs3698109   | 3 | 71209119 | A | A | A | A | A | A |
| 7132 | rs3717453   | 3 | 71468066 | G | G | A | G | A | G |
| 7133 | rs3680433   | 3 | 71525511 | A | A | C | A | C | A |
| 7134 | rs6251545   | 3 | 71660011 | G | G | G | G | G | G |
| 7135 | rs3090390   | 3 | 71706209 | G | A | A | G | A | G |
| 7136 | rs3022961   | 3 | 71813330 | A | G | A | A | A | A |
| 7137 | rs6264454   | 3 | 71858927 | A | A | G | G | G | A |
| 7138 | rs3699288   | 3 | 72179568 | A | G | G | G | G | A |
| 7139 | rs3693395   | 3 | 72445252 | A | C | C | C | C | A |
| 7140 | rs3715136   | 3 | 72730362 | A | A | A | C | A | A |
| 7141 | rs6210155   | 3 | 72881766 | A | A | A | A | A | A |
| 7142 | rs2020552   | 3 | 73134921 | A | A | A | A | A | A |
| 7143 | rs3671511   | 3 | 73232814 | G | G | G | A | G | G |
| 7144 | rs6228802   | 3 | 73255926 | A | A | A | A | A | A |
| 7145 | rs4137345   | 3 | 73568123 | C | C | A | A | A | C |
| 7146 | rs6189620   | 3 | 74159485 | G | G | A | A | A | G |
| 7147 | rs6401341   | 3 | 74657515 | C | C | C | A | A | C |
| 7148 | rs6384991   | 3 | 75371911 | A | A | A | A | A | A |
| 7149 | rs6368888   | 3 | 75377598 | G | A | A | A | G | G |
| 7150 | rs3695004   | 3 | 75740748 | A | G | G | G | G | G |
| 7151 | rs8273642   | 3 | 75957143 | A | A | A | A | A | A |
| 7152 | rs6338429   | 3 | 76013182 | A | A | A | A | A | A |
| 7153 | rs8273648   | 3 | 76016414 | G | G | G | G | A | G |
| 7154 | rs8273664   | 3 | 76019138 | G | G | G | G | G | G |
| 7155 | rs3718054   | 3 | 76447907 | C | C | A | A | A | C |
| 7156 | rs6322772   | 3 | 77064260 | A | A | A | A | A | A |
| 7157 | rs3653769   | 3 | 77244331 | G | G | G | G | A | A |
| 7158 | rs3088562   | 3 | 77475627 | A | A | A | A | A | A |
| 7159 | rs6224757   | 3 | 77507569 | C | C | C | C | C | C |
| 7160 | rs3726567   | 3 | 77849745 | A | C | C | C | C | A |
| 7161 | rs6385363   | 3 | 78223823 | A | A | A | A | A | A |
| 7162 | rs6317775   | 3 | 78240792 | A | G | G | G | A | G |
| 7163 | rs3672300   | 3 | 78305116 | C | A | A | A | C | A |
| 7164 | rs3715352   | 3 | 78618892 | G | G | G | A | A | G |
| 7165 | rs3702037   | 3 | 79254391 | T | T | T | A | A | T |
| 7166 | rs6193292   | 3 | 79287399 | G | G | G | G | G | G |
| 7167 | rs3720421   | 3 | 79288431 | G | A | A | G | A | A |
| 7168 | rs3677276   | 3 | 79444441 | G | G | G | A | G | G |
| 7169 | rs3683507   | 3 | 79585796 | A | A | A | C | A | A |
| 7170 | rs4224010   | 3 | 79651222 | A | A | A | A | A | A |
| 7171 | rs6310547   | 3 | 79677013 | A | A | A | A | A | A |
| 7172 | rs3686804   | 3 | 79722098 | G | G | G | A | G | G |
| 7173 | rs6395358   | 3 | 80649862 | A | A | A | A | A | A |
| 7174 | rs3723964   | 3 | 80760887 | A | G | G | G | G | G |
| 7175 | rs6157283   | 3 | 80891061 | A | A | A | G | G | G |

|      |             |   |          |      |   |     |   |   |   |
|------|-------------|---|----------|------|---|-----|---|---|---|
| 7176 | rs3659866   | 3 | 81285486 | A    | A | A   | G | A | G |
| 7177 | rs3689917   | 3 | 81520907 | C    | C | C   | G | C | C |
| 7178 | rs6354512   | 3 | 81523646 | A    | A | A   | A | A | A |
| 7179 | rs4224017   | 3 | 81610159 | G    | G | G   | G | G | G |
| 7180 | rs6224368   | 3 | 81807591 | A    | A | A   | A | A | A |
| 7181 | rs3685286   | 3 | 81893232 | A    | A | A   | G | A | A |
| 7182 | rs3706413   | 3 | 82586808 | A    | G | G   | G | G | G |
| 7183 | rs6315046   | 3 | 82771431 | G    | G | G   | G | G | G |
| 7184 | rs3699123   | 3 | 82791773 | A    | G | G   | A | G | A |
| 7185 | rs6227500   | 3 | 83408035 | G    | G | G   | G | G | G |
| 7186 | rs3699532   | 3 | 83634097 | C    | A | A   | C | C | C |
| 7187 | rs4221946   | 3 | 84169357 | G    | G | G   | G | G | G |
| 7188 | rs6329605   | 3 | 84225548 | G    | G | G   | G | G | G |
| 7189 | rs3708227   | 3 | 84422484 | A    | G | G   | A | A | A |
| 7190 | mCV24886073 | 3 | 89418525 | G    | A | A   | G | A | A |
| 7191 | rs3726270   | 3 | 84520730 | G    | G | G   | A | G | A |
| 7192 | rs3665763   | 3 | 84897505 | A    | A | A   | C | A | A |
| 7193 | rs4136366   | 3 | 85309719 | G    | A | A   | A | G | A |
| 7194 | rs3667053   | 3 | 85577332 | C    | C | C   | A | A | A |
| 7195 | rs6243021   | 3 | 85606676 | A    | A | A   | G | A | G |
| 7196 | rs3696976   | 3 | 85620198 | NONE | A | A   | C | A | C |
| 7197 | mCV24882303 | 3 | 90520092 | A    | A | A   | A | C | A |
| 7198 | rs3705396   | 3 | 85883601 | A    | G | G   | G | G | G |
| 7199 | mCV24984125 | 3 | 91088111 | G    | A | A   | A | G | A |
| 7200 | rs6340574   | 3 | 86385693 | A    | G | G   | A | A | A |
| 7201 | rs3698196   | 3 | 86596670 | G    | G | G   | A | G | A |
| 7202 | rs6327196   | 3 | 86767512 | C    | C | C   | C | C | C |
| 7203 | rs3688780   | 3 | 86858364 | G    | G | G   | C | G | C |
| 7204 | rs6364303   | 3 | 87272454 | A    | A | A   | A | A | A |
| 7205 | mCV24245305 | 3 | 88894429 | G    | G | G   | G | G | G |
| 7206 | rs3670634   | 3 | 87680439 | A    | A | A   | T | A | A |
| 7207 | rs4224041   | 3 | 87858096 | A    | A | A   | C | A | A |
| 7208 | rs3665990   | 3 | 87879075 | A    | A | A   | G | A | A |
| 7209 | rs4138858   | 3 | 88133448 | C    | C | C   | A | C | C |
| 7210 | rs3726528   | 3 | 88140043 | A    | A | A   | G | A | A |
| 7211 | rs4224044   | 3 | 88443152 | A    | C | C   | A | A | C |
| 7212 | rs4224047   | 3 | 88443277 | A    | A | A   | A | A | A |
| 7213 | rs6368299   | 3 | 88599395 | G    | G | G   | G | G | G |
| 7214 | rs6403572   | 3 | 89027785 | A    | A | A   | A | A | A |
| 7215 | rs8259159   | 3 | 89656428 | G    | G | G   | G | G | G |
| 7216 | rs4224072   | 3 | 89768648 | A    | A | A   | A | A | A |
| 7217 | rs8260435   | 3 | 89772279 | G    | G | G   | G | G | G |
| 7218 | rs6271093   | 3 | 89794721 | G    | G | G   | G | G | G |
| 7219 | rs6277809   | 3 | 89934734 | G    | G | G   | G | G | G |
| 7220 | rs6332465   | 3 | 90217503 | A    | A | A   | A | A | A |
| 7221 | rs4224075   | 3 | 90315386 | A    | A | A   | A | A | A |
| 7222 | mCV24550998 | 3 | 94106299 | A    | A | A   | A | A | A |
| 7223 | rs6211610   | 3 | 90650953 | G    | G | G   | G | A | G |
| 7224 | rs6224522   | 3 | 91037299 | A    | A | A   | A | C | A |
| 7225 | rs6325730   | 3 | 91477570 | C    | C | C   | C | C | C |
| 7226 | rs6317479   | 3 | 92218995 | G    | G | G   | G | G | G |
| 7227 | rs3697710   | 3 | 93210369 | C    | C | C   | A | A | A |
| 7228 | rs3708085   | 3 | 93247014 | A    | A | A   | G | G | G |
| 7229 | rs3708699   | 3 | 93247088 | G    | G | G   | A | A | A |
| 7230 | rs3661505   | 3 | 93251869 | G    | G | G   | A | A | A |
| 7231 | rs4135965   | 3 | 93252158 | G    | G | G   | A | A | A |
| 7232 | rs6227030   | 3 | 93316355 | G    | G | G   | A | A | A |
| 7233 | rs6256990   | 3 | 93357257 | A    | G | G   | A | A | A |
| 7234 | rs3696371   | 3 | 93462597 | A/G  | A | A/G | G | G | G |
| 7235 | rs6323442   | 3 | 93472568 | A    | G | G   | A | A | A |
| 7236 | rs4224087   | 3 | 93508892 | A    | A | A   | A | A | A |
| 7237 | rs4224086   | 3 | 93508938 | A    | A | A   | A | A | A |
| 7238 | rs4224101   | 3 | 94250845 | A    | A | A   | A | A | A |
| 7239 | rs3674983   | 3 | 94421659 | G    | G | G   | C | G | G |
| 7240 | rs3654088   | 3 | 94467844 | T    | A | A   | T | T | T |
| 7241 | rs6315947   | 3 | 94984041 | A    | A | A   | A | A | A |
| 7242 | rs4224105   | 3 | 95213999 | G    | G | G   | G | G | G |
| 7243 | rs8251931   | 3 | 95463301 | G    | G | G   | G | G | G |
| 7244 | rs3717575   | 3 | 95484469 | G    | A | A   | G | G | G |
| 7245 | rs8252196   | 3 | 95488608 | G    | G | G   | G | A | G |
| 7246 | rs8252013   | 3 | 95490318 | T    | T | T   | T | T | T |
| 7247 | rs8252014   | 3 | 95490372 | A    | A | A   | A | A | A |
| 7248 | rs3720007   | 3 | 95517021 | G    | A | A   | A | A | A |
| 7249 | rs4140010   | 3 | 95574347 | A    | G | G   | G | G | G |

|      |             |   |           |   |   |   |     |   |   |
|------|-------------|---|-----------|---|---|---|-----|---|---|
| 7250 | rs6217010   | 3 | 96026491  | A | A | A | G   | G | A |
| 7251 | mCV23386977 | 3 | 99501834  | G | A | A | G   | G | G |
| 7252 | rs4224122   | 3 | 96193283  | A | A | A | G   | G | A |
| 7253 | rs4224125   | 3 | 96193407  | G | G | G | A   | A | G |
| 7254 | rs3716753   | 3 | 96401770  | A | A | A | G   | G | A |
| 7255 | rs6405447   | 3 | 96740405  | G | G | G | G   | G | G |
| 7256 | rs3687989   | 3 | 96956421  | G | G | G | A   | A | G |
| 7257 | rs3680173   | 3 | 97007924  | G | C | C | C   | C | C |
| 7258 | rs3022964   | 3 | 97282711  | G | A | A | A   | A | G |
| 7259 | rs6230337   | 3 | 97338812  | G | G | G | G   | G | G |
| 7260 | mCV25367221 | 3 | 101099345 | G | A | A | G   | A | G |
| 7261 | rs6391963   | 3 | 98231198  | C | A | A | A   | A | C |
| 7262 | rs3675845   | 3 | 98325723  | G | G | G | G   | A | G |
| 7263 | rs3713442   | 3 | 98390016  | G | A | A | A   | A | G |
| 7264 | rs4224132   | 3 | 98430448  | C | C | C | C   | C | C |
| 7265 | mCV25105052 | 3 | 102194331 | A | A | A | A   | A | A |
| 7266 | rs8245788   | 3 | 98731105  | A | A | A | A   | A | A |
| 7267 | rs6222376   | 3 | 98777175  | A | G | G | G   | A | A |
| 7268 | rs3686473   | 3 | 98864236  | A | G | A | G   | A | A |
| 7269 | rs3708129   | 3 | 98882760  | A | A | A | G   | G | A |
| 7270 | rs3726226   | 3 | 98954988  | G | G | G | A   | A | G |
| 7271 | rs6279860   | 3 | 99683366  | G | G | G | G   | G | G |
| 7272 | rs3694780   | 3 | 99836337  | G | G | G | A   | A | A |
| 7273 | rs3667147   | 3 | 99891590  | G | A | A | G   | G | G |
| 7274 | mCV25363602 | 3 | 103929427 | G | A | A | A   | A | G |
| 7275 | rs6341239   | 3 | 101261614 | A | A | A | A   | A | A |
| 7276 | rs3669106   | 3 | 101263112 | A | C | C | A   | A | A |
| 7277 | rs3712802   | 3 | 101817233 | T | T | T | A   | A | T |
| 7278 | rs6199015   | 3 | 101842424 | A | A | A | A   | A | A |
| 7279 | mCV23283853 | 3 | 106418717 | G | G | A | G   | A | G |
| 7280 | rs3671622   | 3 | 102314702 | G | A | A | G   | G | G |
| 7281 | rs4138887   | 3 | 102619416 | T | T | T | A   | A | T |
| 7282 | rs6347476   | 3 | 102772837 | A | A | A | C   | C | A |
| 7283 | rs4224146   | 3 | 102988527 | A | A | A | A   | A | A |
| 7284 | rs6253109   | 3 | 103139941 | G | G | A | G   | G | G |
| 7285 | rs3712827   | 3 | 103490418 | G | A | A | A   | A | G |
| 7286 | rs3714420   | 3 | 103515881 | G | A | A | G   | G | G |
| 7287 | rs3701653   | 3 | 103564280 | C | A | A | A   | A | C |
| 7288 | rs4224155   | 3 | 103751962 | A | A | A | A   | A | A |
| 7289 | rs4224148   | 3 | 103752315 | G | G | G | G   | G | G |
| 7290 | rs3688731   | 3 | 104208035 | A | T | T | T   | T | A |
| 7291 | rs6315710   | 3 | 104585700 | C | C | C | C   | C | C |
| 7292 | rs6188615   | 3 | 105330240 | G | G | G | A   | A | G |
| 7293 | rs6364731   | 3 | 105692661 | A | A | A | A   | A | A |
| 7294 | rs8236502   | 3 | 106220623 | G | G | G | G   | G | G |
| 7295 | rs8236505   | 3 | 106224738 | A | G | G | A   | A | A |
| 7296 | rs8240587   | 3 | 106225504 | G | G | G | G   | G | G |
| 7297 | rs8236508   | 3 | 106225921 | A | T | T | A   | A | A |
| 7298 | rs8253116   | 3 | 106226221 | G | A | A | G   | G | G |
| 7299 | rs6386146   | 3 | 106774874 | A | A | A | A   | A | A |
| 7300 | rs6354538   | 3 | 107175698 | A | A | A | A   | A | A |
| 7301 | rs3702359   | 3 | 107508882 | A | C | C | A   | C | A |
| 7302 | rs3686353   | 3 | 107544480 | G | C | C | G   | C | G |
| 7303 | rs3662271   | 3 | 107680188 | G | G | G | G   | A | G |
| 7304 | rs4224160   | 3 | 107686675 | G | G | G | G   | G | G |
| 7305 | rs3684333   | 3 | 107850823 | G | C | C | C   | C | C |
| 7306 | rs6259798   | 3 | 107851256 | A | G | G | G   | A | G |
| 7307 | rs8259688   | 3 | 108320670 | G | G | G | G   | G | G |
| 7308 | rs8259738   | 3 | 108323936 | A | A | A | A   | A | A |
| 7309 | rs8241998   | 3 | 108344014 | A | A | A | A   | A | A |
| 7310 | rs8259678   | 3 | 108349178 | G | G | A | G   | G | G |
| 7311 | rs8236521   | 3 | 108397012 | A | A | A | A   | A | A |
| 7312 | rs8236522   | 3 | 108397043 | C | C | C | C   | C | C |
| 7313 | mCV25436350 | 3 | 113449989 | G | A | A | G   | A | A |
| 7314 | rs6210304   | 3 | 109675077 | C | C | C | C   | C | C |
| 7315 | rs3672938   | 3 | 109847591 | G | G | G | G   | G | G |
| 7316 | rs3722681   | 3 | 110165817 | A | A | A | G   | G | A |
| 7317 | rs3704665   | 3 | 110229807 | A | A | A | G   | G | A |
| 7318 | rs6366730   | 3 | 110251230 | A | A | A | G   | G | A |
| 7319 | rs8256683   | 3 | 110372955 | G | G | G | A/G | A | G |
| 7320 | mCV24793263 | 3 | 117251175 | G | A | A | A   | G | G |
| 7321 | rs3663873   | 3 | 110571048 | G | G | A | A   | G | G |
| 7322 | rs4224162   | 3 | 110640144 | G | G | G | G   | G | G |
| 7323 | rs3676545   | 3 | 110649631 | G | G | G | A   | G | G |

|      |             |   |           |   |   |   |   |   |   |
|------|-------------|---|-----------|---|---|---|---|---|---|
| 7324 | rs3656131   | 3 | 110947327 | T | T | T | A | T | T |
| 7325 | mCV23378745 | 9 | 5761010   | A | G | G | G | G | G |
| 7326 | rs3720740   | 3 | 111041753 | A | A | A | A | A | A |
| 7327 | rs3696843   | 3 | 111168609 | A | A | A | G | G | A |
| 7328 | rs6313013   | 3 | 111286362 | A | A | A | G | G | A |
| 7329 | mCV23317479 | 9 | 5197667   | A | G | G | G | G | G |
| 7330 | rs3674856   | 3 | 111611114 | G | G | G | A | G | G |
| 7331 | rs3090825   | 3 | 111647306 | G | G | G | G | G | G |
| 7332 | rs3711702   | 3 | 111705986 | A | A | A | G | A | A |
| 7333 | rs3717172   | 3 | 111934855 | G | A | A | G | G | G |
| 7334 | rs6211037   | 3 | 111988299 | A | T | T | T | A | A |
| 7335 | rs6281357   | 3 | 112109659 | A | A | A | G | A | A |
| 7336 | rs6199580   | 3 | 112477321 | A | A | A | G | G | G |
| 7337 | rs3698700   | 3 | 112624069 | A | A | A | T | A | A |
| 7338 | mCV23893269 | 9 | 3980881   | A | C | C | C | C | C |
| 7339 | rs3721786   | 3 | 112749976 | A | A | A | G | G | G |
| 7340 | rs3687751   | 3 | 113054672 | G | G | G | A | A | A |
| 7341 | rs3694754   | 3 | 113073920 | A | A | A | G | A | A |
| 7342 | rs6207837   | 3 | 113129958 | G | G | G | A | A | A |
| 7343 | rs3718507   | 3 | 113237977 | G | G | G | A | A | A |
| 7344 | rs3657795   | 3 | 114344827 | G | G | G | C | G | G |
| 7345 | rs3022965   | 3 | 114351927 | G | G | G | A | G | G |
| 7346 | rs6221470   | 3 | 114360910 | G | G | G | A | G | G |
| 7347 | rs3682339   | 3 | 114414812 | A | A | A | G | A | A |
| 7348 | rs3688988   | 3 | 114722164 | A | G | G | A | G | G |
| 7349 | rs6179750   | 3 | 114804209 | A | C | C | A | C | C |
| 7350 | rs3694286   | 3 | 115487510 | G | A | A | G | A | A |
| 7351 | rs6290322   | 3 | 115696298 | G | A | A | G | A | A |
| 7352 | rs6169590   | 3 | 115710049 | G | G | G | G | G | G |
| 7353 | rs3689240   | 3 | 115777190 | A | G | G | A | G | G |
| 7354 | rs3710419   | 3 | 116000138 | A | G | G | G | G | G |
| 7355 | rs4224168   | 3 | 116288485 | A | A | A | G | A | A |
| 7356 | rs3659643   | 3 | 116403695 | T | A | A | A | A | A |
| 7357 | rs3722079   | 3 | 116461864 | G | A | A | G | A | A |
| 7358 | rs6175127   | 3 | 116741394 | A | A | A | A | A | A |
| 7359 | rs3668353   | 3 | 117171934 | A | C | C | C | C | C |
| 7360 | rs3709137   | 3 | 117343865 | C | C | C | G | C | C |
| 7361 | rs6214597   | 3 | 117350554 | A | A | A | A | G | G |
| 7362 | rs3708412   | 3 | 118002787 | G | G | G | A | A | G |
| 7363 | rs2020778   | 3 | 118037331 | A | A | A | A | A | A |
| 7364 | rs6249418   | 3 | 118088000 | G | G | G | G | G | G |
| 7365 | rs3709732   | 3 | 118315060 | A | G | G | G | G | G |
| 7366 | rs3664868   | 3 | 118318914 | G | A | A | G | G | A |
| 7367 | rs3707883   | 3 | 119036509 | A | A | A | A | A | A |
| 7368 | rs6369822   | 3 | 119202135 | G | G | G | G | G | G |
| 7369 | rs6232971   | 3 | 120074521 | G | G | G | G | G | G |
| 7370 | rs6353079   | 3 | 120694394 | A | A | A | A | A | A |
| 7371 | rs3658791   | 3 | 120952771 | G | A | A | G | G | A |
| 7372 | rs3718783   | 3 | 121131740 | G | G | G | A | A | G |
| 7373 | rs3669081   | 3 | 121192201 | A | A | A | G | G | A |
| 7374 | rs6259281   | 3 | 121262108 | G | C | C | G | C | C |
| 7375 | mCV23385188 | 3 | 121513280 | C | C | C | C | A | C |
| 7376 | rs4224178   | 3 | 121593100 | G | G | G | G | G | G |
| 7377 | rs4224186   | 3 | 121744885 | A | A | A | A | G | A |
| 7378 | rs6212614   | 3 | 121841101 | A | G | G | A | G | G |
| 7379 | rs3659836   | 3 | 122002332 | G | A | A | A | G | A |
| 7380 | rs4224199   | 3 | 122397955 | A | A | A | A | G | A |
| 7381 | rs4224197   | 3 | 122398195 | G | G | G | G | A | G |
| 7382 | rs4224196   | 3 | 122398222 | G | G | G | G | G | G |
| 7383 | rs2228908   | 3 | 122585612 | T | T | T | T | A | T |
| 7384 | rs3691246   | 3 | 122856224 | G | A | A | A | G | A |
| 7385 | rs6188758   | 3 | 123003410 | A | A | A | A | A | A |
| 7386 | rs3681787   | 3 | 123554127 | A | G | G | G | G | G |
| 7387 | mCV23483645 | 3 | 123767337 | G | A | A | G | A | G |
| 7388 | rs3675720   | 3 | 123787212 | G | A | A | G | A | G |
| 7389 | rs3704417   | 3 | 123846645 | T | A | A | T | T | T |
| 7390 | rs3706670   | 3 | 123863052 | A | G | G | A | A | A |
| 7391 | rs6212658   | 3 | 124028534 | G | A | A | G | G | G |
| 7392 | rs3720182   | 3 | 124100505 | G | A | A | G | G | G |
| 7393 | rs3707706   | 3 | 124412848 | A | C | C | A | A | A |
| 7394 | rs6182907   | 3 | 124480088 | A | G | G | A | A | A |
| 7395 | rs3699776   | 3 | 124840765 | G | G | G | A | A | A |
| 7396 | rs3697140   | 3 | 125179187 | G | A | A | G | G | G |
| 7397 | rs6254464   | 3 | 125891846 | A | A | A | A | A | A |

|      |             |   |           |   |   |   |   |   |   |
|------|-------------|---|-----------|---|---|---|---|---|---|
| 7398 | rs3691045   | 3 | 126325091 | A | G | G | A | A | A |
| 7399 | rs4224203   | 3 | 126347985 | G | A | A | G | G | G |
| 7400 | rs3022968   | 3 | 126349073 | G | A | A | G | G | G |
| 7401 | rs6287083   | 3 | 126359312 | A | G | G | A | A | A |
| 7402 | rs8255228   | 3 | 126397223 | A | G | G | A | A | A |
| 7403 | rs3671119   | 3 | 126894715 | G | G | G | A | G | A |
| 7404 | rs3675048   | 3 | 126969163 | G | G | G | A | G | A |
| 7405 | rs6220661   | 3 | 127039047 | A | A | A | G | G | G |
| 7406 | rs3722725   | 3 | 127042830 | T | T | T | A | A | A |
| 7407 | rs3702789   | 3 | 127084731 | C | C | C | A | A | A |
| 7408 | rs3717432   | 3 | 127536252 | G | G | G | A | A | A |
| 7409 | rs3698974   | 3 | 127544969 | A | A | A | C | C | C |
| 7410 | rs6285599   | 3 | 127728173 | G | G | G | A | A | A |
| 7411 | rs6377831   | 3 | 127995597 | G | G | G | A | A | A |
| 7412 | rs3688504   | 3 | 128039511 | A | A | A | G | G | G |
| 7413 | rs6164477   | 3 | 128196218 | A | A | A | A | A | A |
| 7414 | rs6194090   | 3 | 128321186 | G | G | G | A | A | A |
| 7415 | rs3688827   | 3 | 128500828 | G | G | G | A | A | A |
| 7416 | rs3679962   | 3 | 128582235 | G | G | G | A | A | A |
| 7417 | rs3670168   | 3 | 128820535 | A | A | A | C | A | C |
| 7418 | rs3697858   | 3 | 129106005 | C | C | C | A | C | A |
| 7419 | rs6363768   | 3 | 129189421 | A | A | A | A | A | A |
| 7420 | rs3090387   | 3 | 129514464 | A | A | A | A | A | A |
| 7421 | mCV23446189 | 3 | 129786008 | G | G | A | G | A | G |
| 7422 | rs8253183   | 3 | 129862998 | G | G | G | G | G | G |
| 7423 | rs8253136   | 3 | 129863358 | A | A | A | A | A | A |
| 7424 | rs6364587   | 3 | 130373139 | A | A | A | A | A | A |
| 7425 | rs6202228   | 3 | 130724949 | A | A | A | A | A | A |
| 7426 | rs3679440   | 3 | 130739420 | T | T | A | T | A | T |
| 7427 | rs6220280   | 3 | 130836961 | G | G | G | G | G | G |
| 7428 | rs3725129   | 3 | 131172066 | G | G | A | G | A | G |
| 7429 | rs4224205   | 3 | 131217946 | A | A | A | A | A | A |
| 7430 | rs3658914   | 3 | 131411343 | A | G | A | G | A | A |
| 7431 | rs6157007   | 3 | 131705669 | A | A | A | A | A | A |
| 7432 | rs3660884   | 3 | 131803570 | A | A | A | A | G | G |
| 7433 | rs3710354   | 3 | 132124986 | C | C | G | C | A | C |
| 7434 | rs4224211   | 3 | 132129608 | G | G | G | G | G | G |
| 7435 | rs3088954   | 3 | 132354130 | T | T | T | T | T | T |
| 7436 | rs3665032   | 3 | 132519108 | G | A | A | G | A | A |
| 7437 | rs6199211   | 3 | 132635283 | A | A | A | A | A | A |
| 7438 | rs3659168   | 3 | 133247740 | G | A | A | A | G | A |
| 7439 | rs6162982   | 3 | 133462063 | A | A | A | A | A | A |
| 7440 | rs6347693   | 3 | 133608106 | A | A | A | A | A | A |
| 7441 | rs3724110   | 3 | 134101271 | C | A | A | A | A | A |
| 7442 | rs6397585   | 3 | 134745176 | A | A | A | A | A | A |
| 7443 | rs3685539   | 3 | 134945023 | A | G | G | G | G | G |
| 7444 | mCV23230498 | 3 | 135570407 | G | G | G | G | A | A |
| 7445 | rs6347082   | 3 | 135470746 | C | C | C | C | C | C |
| 7446 | rs6199240   | 3 | 135971946 | G | G | G | G | G | G |
| 7447 | rs6305792   | 3 | 136332325 | A | G | G | G | G | G |
| 7448 | rs4224231   | 3 | 136601744 | G | G | G | G | G | G |
| 7449 | rs3719076   | 3 | 136696437 | A | G | G | G | G | G |
| 7450 | rs3676039   | 3 | 136766271 | G | A | A | G | A | A |
| 7451 | rs3676561   | 3 | 136766340 | G | A | A | G | A | A |
| 7452 | rs6247823   | 3 | 137432871 | A | A | A | A | A | A |
| 7453 | rs6320746   | 3 | 137632413 | A | A | A | A | A | A |
| 7454 | rs3671858   | 3 | 137955491 | A | C | C | C | C | C |
| 7455 | rs3706263   | 3 | 138105859 | C | C | C | A | C | C |
| 7456 | mCV23030574 | 3 | 138721705 | C | C | C | A | C | C |
| 7457 | mCV23030567 | 3 | 138721983 | G | G | G | A | G | G |
| 7458 | mCV23030565 | 3 | 138730714 | A | A | A | C | A | A |
| 7459 | mCV23030558 | 3 | 138731092 | A | A | A | G | A | A |
| 7460 | mCV23030557 | 3 | 138731194 | G | G | G | A | G | G |
| 7461 | mCV23030556 | 3 | 138731622 | T | A | A | A | T | T |
| 7462 | mCV23030549 | 3 | 138731689 | A | A | A | G | A | A |
| 7463 | mCV23030542 | 3 | 138732587 | A | A | A | G | A | A |
| 7464 | mCV23030541 | 3 | 138732650 | G | G | G | A | G | G |
| 7465 | mCV23030363 | 3 | 138732863 | G | G | G | A | G | G |
| 7466 | mCV23030361 | 3 | 138733091 | G | G | G | A | G | G |
| 7467 | mCV23030357 | 3 | 138733119 | G | G | G | C | G | G |
| 7468 | mCV23030356 | 3 | 138733305 | A | A | A | G | A | A |
| 7469 | mCV23030350 | 3 | 138733598 | A | A | A | G | A | A |
| 7470 | mCV23030349 | 3 | 138734786 | A | A | A | G | A | A |
| 7471 | mCV23030345 | 3 | 138734848 | A | A | A | G | A | A |

|      |             |   |           |   |   |   |   |   |   |
|------|-------------|---|-----------|---|---|---|---|---|---|
| 7472 | mCV23030344 | 3 | 138734872 | A | A | A | C | A | A |
| 7473 | mCV23030343 | 3 | 138735067 | G | G | G | A | G | G |
| 7474 | mCV23030339 | 3 | 138735315 | G | G | G | A | G | G |
| 7475 | mCV23030338 | 3 | 138735800 | G | G | G | A | G | G |
| 7476 | mCV23030333 | 3 | 138735892 | A | A | A | G | A | A |
| 7477 | mCV23030328 | 3 | 138736347 | A | A | A | G | A | A |
| 7478 | mCV23030323 | 3 | 138737135 | A | A | A | A | A | A |
| 7479 | mCV23030322 | 3 | 138737206 | A | A | A | G | A | A |
| 7480 | mCV23030321 | 3 | 138737346 | C | C | C | G | C | C |
| 7481 | mCV23030317 | 3 | 138737433 | A | A | A | G | A | A |
| 7482 | mCV23030316 | 3 | 138737559 | A | A | A | G | A | A |
| 7483 | mCV23030308 | 3 | 138737874 | A | A | A | G | A | A |
| 7484 | mCV23030306 | 3 | 141587645 | A | A | A | G | A | A |
| 7485 | mCV23030300 | 3 | 138739554 | C | C | C | A | C | C |
| 7486 | mCV23030088 | 3 | 138740295 | A | A | A | G | A | A |
| 7487 | mCV23030080 | 3 | 138741550 | A | A | A | C | A | A |
| 7488 | mCV23030079 | 3 | 138741604 | A | A | A | C | A | A |
| 7489 | mCV23030078 | 3 | 138741709 | G | G | G | A | G | G |
| 7490 | mCV23030071 | 3 | 138743093 | A | A | A | C | A | A |
| 7491 | mCV23030070 | 3 | 138743263 | A | T | T | T | A | T |
| 7492 | mCV23030069 | 3 | 138743276 | A | A | A | G | A | A |
| 7493 | mCV23030061 | 3 | 138743362 | G | G | G | A | G | G |
| 7494 | mCV23030060 | 3 | 138743526 | A | A | A | C | A | A |
| 7495 | mCV23030052 | 3 | 138743644 | G | G | G | A | G | G |
| 7496 | mCV23030051 | 3 | 138743684 | A | A | A | G | A | A |
| 7497 | mCV23030044 | 3 | 138743743 | A | A | A | C | A | A |
| 7498 | mCV23030043 | 3 | 138743871 | G | G | G | A | G | G |
| 7499 | mCV23030042 | 3 | 138743920 | T | T | T | A | T | T |
| 7500 | mCV23030025 | 3 | 138744236 | A | A | A | G | A | A |
| 7501 | rs4224261   | 3 | 138474090 | A | A | A | A | A | A |
| 7502 | rs6359968   | 3 | 138546973 | G | G | G | G | G | G |
| 7503 | rs3699249   | 3 | 138663643 | A | T | T | A | A | A |
| 7504 | rs3669047   | 3 | 138773928 | G | G | G | A | G | G |
| 7505 | rs3091034   | 3 | 139012303 | A | A | A | A | A | A |
| 7506 | rs3659645   | 3 | 139214752 | A | G | G | G | A | G |
| 7507 | rs6357455   | 3 | 139452899 | A | C | C | C | C | A |
| 7508 | mCV24856311 | 3 | 140262118 | A | A | A | G | A | A |
| 7509 | rs3089626   | 3 | 140010329 | A | A | A | A | A | A |
| 7510 | rs3720498   | 3 | 140030643 | A | A | A | G | A | A |
| 7511 | rs6299094   | 3 | 140146813 | A | A | A | A | A | A |
| 7512 | rs3655208   | 3 | 140341393 | A | A | A | G | A | A |
| 7513 | rs3679306   | 3 | 140561089 | G | G | G | A | G | G |
| 7514 | rs3664998   | 3 | 140619815 | G | G | G | A | G | G |
| 7515 | rs6373496   | 3 | 140647239 | G | G | G | G | G | G |
| 7516 | rs4138815   | 3 | 140998672 | G | A | A | G | A | A |
| 7517 | rs3090380   | 3 | 141341520 | G | A | A | A | A | A |
| 7518 | rs6263345   | 3 | 141480213 | G | G | G | G | G | G |
| 7519 | rs3673719   | 3 | 141531951 | G | A | A | A | A | A |
| 7520 | rs3698531   | 3 | 142091053 | A | A | A | G | G | G |
| 7521 | rs3718489   | 3 | 142338111 | G | G | G | C | C | C |
| 7522 | rs4224267   | 3 | 142398573 | T | T | T | T | T | T |
| 7523 | rs3091193   | 3 | 142398849 | C | C | C | C | C | C |
| 7524 | rs6192206   | 3 | 142604537 | A | A | A | A | A | A |
| 7525 | rs4224277   | 3 | 143131322 | G | G | G | G | G | G |
| 7526 | rs3091029   | 3 | 143131555 | A | A | A | A | A | A |
| 7527 | rs6290401   | 3 | 143193940 | G | G | G | G | A | A |
| 7528 | rs6261585   | 3 | 143343124 | A | A | A | G | A | A |
| 7529 | rs6258013   | 3 | 143453374 | A | A | A | C | A | A |
| 7530 | rs3694521   | 3 | 143476580 | G | G | G | A | A | A |
| 7531 | rs6407142   | 3 | 143619317 | A | A | A | G | G | G |
| 7532 | rs6391253   | 3 | 144306167 | C | A | A | C | A | A |
| 7533 | rs3677650   | 3 | 144611820 | A | G | G | G | G | G |
| 7534 | rs3682091   | 3 | 144870033 | G | A | A | A | G | G |
| 7535 | rs4224282   | 3 | 145001550 | G | G | G | G | G | G |
| 7536 | rs8236528   | 3 | 145571450 | G | G | G | G | G | G |
| 7537 | rs8243522   | 3 | 145572052 | A | A | A | A | G | A |
| 7538 | rs8255972   | 3 | 145575488 | A | A | A | A | A | A |
| 7539 | rs8255985   | 3 | 145575936 | G | G | G | G | G | G |
| 7540 | rs8243132   | 3 | 145583459 | A | A | A | A | A | A |
| 7541 | rs3688244   | 3 | 146003911 | T | T | T | A | T | A |
| 7542 | rs6284325   | 3 | 146181663 | A | A | A | A | A | A |
| 7543 | rs6157876   | 3 | 146508618 | C | C | C | C | C | C |
| 7544 | rs3710548   | 3 | 146841800 | G | G | G | A | A | A |
| 7545 | rs3022970   | 3 | 146873102 | G | C | C | G | G | G |

|      |             |   |           |   |      |   |   |   |   |
|------|-------------|---|-----------|---|------|---|---|---|---|
| 7546 | rs3682093   | 3 | 146978526 | A | G    | G | A | A | A |
| 7547 | rs4224290   | 3 | 147157302 | C | C    | C | C | C | C |
| 7548 | rs3688583   | 3 | 147213351 | A | A    | A | G | A | A |
| 7549 | rs3022971   | 3 | 147306439 | G | G    | G | A | G | G |
| 7550 | rs6250754   | 3 | 147481201 | A | A    | A | A | A | A |
| 7551 | rs3706762   | 3 | 148152773 | G | G    | G | A | A | G |
| 7552 | rs4139604   | 3 | 148249896 | A | A    | A | G | G | A |
| 7553 | rs3090238   | 3 | 148272182 | T | T    | T | T | T | T |
| 7554 | rs6401225   | 3 | 148336754 | G | G    | G | A | A | G |
| 7555 | rs3683215   | 3 | 148793419 | C | C    | C | C | C | C |
| 7556 | rs3657112   | 3 | 148942421 | A | A    | A | G | G | A |
| 7557 | rs6300594   | 3 | 148966765 | T | T    | T | A | A | T |
| 7558 | rs6155693   | 3 | 149177520 | A | A    | A | A | A | A |
| 7559 | rs4224297   | 3 | 149393785 | A | A    | A | A | A | A |
| 7560 | rs4224296   | 3 | 149393844 | G | G    | G | G | G | G |
| 7561 | rs3722447   | 3 | 149523236 | A | G    | G | G | G | G |
| 7562 | rs6263248   | 3 | 150055497 | G | G    | G | G | G | G |
| 7563 | rs6261685   | 3 | 150310520 | A | A    | A | A | A | A |
| 7564 | rs3718587   | 3 | 150314430 | C | C    | C | G | C | C |
| 7565 | rs3696452   | 3 | 150512059 | A | A    | A | G | A | A |
| 7566 | rs3681780   | 3 | 150866693 | C | C    | C | A | A | A |
| 7567 | rs3721602   | 3 | 151198677 | A | A    | A | C | A | A |
| 7568 | rs6380272   | 3 | 151430016 | C | C    | C | C | C | C |
| 7569 | rs3724562   | 3 | 151923922 | A | A    | A | G | A | A |
| 7570 | rs6199296   | 3 | 152070005 | A | A    | A | A | A | A |
| 7571 | rs6161409   | 3 | 152074162 | G | G    | G | A | G | G |
| 7572 | rs6262668   | 3 | 152119478 | G | G    | G | A | G | G |
| 7573 | rs3676735   | 3 | 152366628 | A | A    | A | T | T | T |
| 7574 | rs3653892   | 3 | 152373112 | G | G    | G | A | A | A |
| 7575 | rs4224301   | 3 | 152391347 | C | C    | C | C | C | C |
| 7576 | rs4224298   | 3 | 152391603 | G | G    | G | G | G | G |
| 7577 | rs3695139   | 3 | 152956281 | T | T    | T | A | A | A |
| 7578 | rs3686068   | 3 | 152985388 | G | A    | A | G | G | G |
| 7579 | mCV25265490 | 3 | 153485338 | G | G    | G | A | A | A |
| 7580 | rs3662069   | 3 | 153028926 | C | G    | G | C | C | C |
| 7581 | rs6381060   | 3 | 153190646 | C | C    | C | C | C | C |
| 7582 | rs3089790   | 3 | 153351487 | G | G    | G | G | G | G |
| 7583 | rs6257013   | 3 | 153600398 | G | G    | G | G | G | G |
| 7584 | rs6297017   | 3 | 154293256 | G | A    | A | A | A | A |
| 7585 | rs3656403   | 3 | 154507439 | G | A    | A | A | A | G |
| 7586 | rs8253213   | 3 | 154545658 | A | A    | A | A | A | A |
| 7587 | rs8253212   | 3 | 154545779 | A | A    | A | A | A | A |
| 7588 | mCV25188584 | 3 | 155123336 | A | G    | G | A | G | G |
| 7589 | rs3716135   | 3 | 154921605 | T | A    | A | T | A | T |
| 7590 | rs4139152   | 3 | 155287410 | G | G    | G | G | G | G |
| 7591 | rs4224343   | 3 | 155353684 | G | G    | G | G | G | G |
| 7592 | rs6322390   | 3 | 155360428 | C | C    | C | C | C | C |
| 7593 | rs3656494   | 3 | 155382051 | A | G    | G | A | G | G |
| 7594 | rs3667807   | 3 | 155575484 | A | G    | G | A | G | A |
| 7595 | rs6245577   | 3 | 155867596 | G | G    | G | G | G | G |
| 7596 | rs3695386   | 3 | 156396523 | A | G    | G | A | G | G |
| 7597 | mCV24198179 | 3 | 157639416 | G | A    | A | G | G | G |
| 7598 | rs6157773   | 3 | 156960730 | C | NONE | A | A | A | C |
| 7599 | rs3090130   | 3 | 157177959 | A | A    | A | A | A | A |
| 7600 | rs3697892   | 3 | 157203410 | G | A    | A | G | G | G |
| 7601 | rs3089034   | 3 | 157538916 | A | A    | A | A | A | A |
| 7602 | rs6201220   | 3 | 157547664 | G | G    | G | G | G | G |
| 7603 | rs3716357   | 3 | 157675785 | A | G    | G | A | A | A |
| 7604 | rs4137032   | 3 | 157906567 | G | G    | G | G | G | G |
| 7605 | rs6341867   | 3 | 158655934 | A | A    | A | A | A | A |
| 7606 | rs3667025   | 3 | 158614152 | G | A    | A | A | A | A |
| 7607 | rs6258754   | 3 | 158848787 | G | G    | G | G | G | G |
| 7608 | rs4136181   | 3 | 158999479 | C | C    | C | A | C | C |
| 7609 | rs3674566   | 3 | 159010475 | G | G    | G | A | G | G |
| 7610 | rs6216866   | 3 | 159675942 | A | A    | A | A | A | A |
| 7611 | rs3689155   | 3 | 160106091 | C | A    | A | A | A | A |
| 7612 | rs3666345   | 3 | 160298455 | G | NONE | A | A | A | A |
| 7613 | rs6322812   | 3 | 160482205 | A | A    | A | A | A | A |
| 7614 | rs4228320   | 3 | 160527867 | G | G    | G | G | G | G |
| 7615 | rs6191908   | 4 | 133607851 | C | C    | C | A | A | A |
| 7616 | rs3655655   | 4 | 1645422   | A | G    | G | A | G | G |
| 7617 | rs6197409   | 4 | 66449150  | A | G    | G | G | G | G |
| 7618 | rs3666852   | 4 | 726286    | G | A    | A | G | A | A |
| 7619 | rs3657480   | 4 | 10782096  | A | G    | G | G | G | A |

|      |             |   |           |   |      |   |   |   |   |
|------|-------------|---|-----------|---|------|---|---|---|---|
| 7620 | rs4225002   | 4 | 154132368 | G | G    | G | G | G | G |
| 7621 | rs4232438   | 4 | 3476410   | A | A    | A | A | A | A |
| 7622 | rs4232433   | 4 | 3476658   | G | G    | G | G | G | G |
| 7623 | rs3695715   | 4 | 3649824   | G | G    | G | A | G | A |
| 7624 | rs6400920   | 4 | 3824829   | C | C    | C | C | C | C |
| 7625 | rs3702283   | 4 | 4494215   | A | A    | G | A | G | A |
| 7626 | rs6305295   | 4 | 5564700   | A | A    | A | A | A | A |
| 7627 | rs3089556   | 4 | 5702872   | G | G    | G | G | G | G |
| 7628 | rs6349397   | 4 | 6141330   | G | G    | G | G | G | G |
| 7629 | rs3716318   | 4 | 6157797   | A | A    | C | A | A | A |
| 7630 | rs6205855   | 4 | 6724822   | A | A    | A | A | A | A |
| 7631 | rs3674982   | 4 | 6820703   | G | G    | G | A | G | G |
| 7632 | rs3660863   | 4 | 7127435   | A | A    | A | G | A | A |
| 7633 | rs6337200   | 4 | 7459072   | A | A    | A | A | A | A |
| 7634 | rs3655175   | 4 | 8139388   | G | G    | G | A | G | G |
| 7635 | rs4224356   | 4 | 8534606   | A | A    | A | A | A | A |
| 7636 | rs6404602   | 4 | 8778812   | A | A    | A | A | A | A |
| 7637 | rs3655556   | 4 | 9508720   | G | G    | A | G | A | G |
| 7638 | rs4224376   | 4 | 9555959   | T | A    | T | T | T | T |
| 7639 | rs4224360   | 4 | 9556341   | A | A    | A | A | A | A |
| 7640 | rs6352515   | 4 | 9558115   | T | T    | T | T | T | T |
| 7641 | rs6260000   | 4 | 10002397  | G | G    | G | G | G | G |
| 7642 | rs6324271   | 4 | 10242036  | A | A    | G | G | G | A |
| 7643 | rs3719315   | 4 | 10713139  | C | A    | A | C | A | C |
| 7644 | rs3657371   | 4 | 10725903  | C | A    | A | A | A | C |
| 7645 | rs6317835   | 4 | 10823373  | T | T    | T | A | T | T |
| 7646 | rs4224381   | 4 | 10915152  | G | G    | G | G | G | G |
| 7647 | rs6291404   | 4 | 10931195  | G | A    | A | A | A | G |
| 7648 | rs6341373   | 4 | 11311121  | G | G    | G | G | G | G |
| 7649 | rs6196764   | 4 | 11408038  | T | A    | A | T | A | A |
| 7650 | rs4224387   | 4 | 11641126  | A | A    | A | A | A | A |
| 7651 | mCV22939387 | 4 | 15321444  | A | G    | A | A | A | A |
| 7652 | rs3701047   | 4 | 12339561  | G | G    | A | G | G | G |
| 7653 | rs6237951   | 4 | 12554425  | G | G    | G | G | G | G |
| 7654 | mCV22933619 | 4 | 15929694  | T | NONE | A | A | A | A |
| 7655 | rs6319783   | 4 | 13814600  | G | G    | G | G | G | G |
| 7656 | rs4136031   | 4 | 14237734  | A | G    | G | G | G | G |
| 7657 | rs3693267   | 4 | 14345285  | A | G    | G | G | G | G |
| 7658 | rs6256059   | 4 | 14860611  | A | A    | A | A | A | A |
| 7659 | rs3680907   | 4 | 14958026  | C | A    | A | A | A | A |
| 7660 | mCV23717969 | 4 | 18178970  | G | A    | A | G | G | G |
| 7661 | rs3090919   | 4 | 15072128  | A | G    | G | G | G | G |
| 7662 | rs6237990   | 4 | 15196232  | A | A    | A | A | A | A |
| 7663 | rs3688067   | 4 | 15593522  | T | T    | A | A | A | A |
| 7664 | rs3688624   | 4 | 15593575  | G | G    | A | A | A | A |
| 7665 | rs3716868   | 4 | 15610542  | G | G    | A | A | A | A |
| 7666 | rs4224398   | 4 | 15903938  | G | G    | G | G | G | G |
| 7667 | rs4224391   | 4 | 15904154  | G | G    | G | G | G | G |
| 7668 | rs6352165   | 4 | 16500286  | G | G    | G | G | G | G |
| 7669 | rs6199418   | 4 | 16781620  | T | T    | T | T | T | T |
| 7670 | rs3709725   | 4 | 17416859  | A | A    | A | A | G | G |
| 7671 | rs6176582   | 4 | 17581384  | A | A    | G | A | G | G |
| 7672 | rs3715008   | 4 | 17814624  | C | A    | A | A | A | A |
| 7673 | rs3712309   | 4 | 17847510  | A | A    | G | G | G | G |
| 7674 | rs6287606   | 4 | 18045313  | G | G    | A | G | A | A |
| 7675 | rs3679281   | 4 | 18609900  | A | A    | A | G | A | A |
| 7676 | rs6222305   | 4 | 18796202  | A | A    | A | A | A | A |
| 7677 | rs6323735   | 4 | 19601811  | T | T    | T | T | T | T |
| 7678 | rs6157822   | 4 | 19658375  | A | A    | A | G | A | A |
| 7679 | rs3022977   | 4 | 19965713  | A | A    | A | G | A | A |
| 7680 | rs6360006   | 4 | 20448854  | A | A    | A | A | A | A |
| 7681 | rs3724961   | 4 | 20643790  | G | G    | G | A | G | G |
| 7682 | mCV22919271 | 4 | 24149712  | G | G    | A | A | A | G |
| 7683 | rs6371922   | 4 | 21491966  | G | G    | G | G | G | G |
| 7684 | rs6211596   | 4 | 21583992  | G | G    | G | A | G | G |
| 7685 | rs3091044   | 4 | 21675640  | G | G    | G | G | G | G |
| 7686 | rs4224405   | 4 | 21763745  | G | G    | G | G | G | G |
| 7687 | rs4224402   | 4 | 21764020  | T | T    | T | T | T | T |
| 7688 | mCV23689174 | 4 | 22356614  | C | C    | A | A | A | C |
| 7689 | rs3088632   | 4 | 22598894  | G | G    | G | G | G | G |
| 7690 | rs6347318   | 4 | 22841696  | C | C    | C | A | C | C |
| 7691 | rs3708026   | 4 | 22843907  | G | G    | G | A | G | G |
| 7692 | rs3698286   | 4 | 22846014  | G | G    | G | A | G | G |
| 7693 | rs3653593   | 4 | 22884502  | A | A    | A | G | A | A |



|      |             |   |          |   |   |   |   |   |   |
|------|-------------|---|----------|---|---|---|---|---|---|
| 7694 | rs3655029   | 4 | 23211273 | G | G | G | C | G | G |
| 7695 | mCV22911972 | 4 | 27231572 | G | G | G | G | G | G |
| 7696 | rs6287534   | 4 | 23825087 | A | A | A | A | A | A |
| 7697 | rs3712649   | 4 | 23935189 | A | A | A | G | G | A |
| 7698 | rs6175954   | 4 | 24029684 | T | T | A | A | A | T |
| 7699 | rs3680190   | 4 | 24724946 | A | A | C | C | C | A |
| 7700 | rs6246002   | 4 | 24831650 | A | A | A | A | A | A |
| 7701 | rs4224426   | 4 | 25176238 | A | A | G | G | G | A |
| 7702 | rs3657154   | 4 | 25277549 | A | A | C | C | C | A |
| 7703 | rs6204487   | 4 | 26277706 | G | G | G | G | G | G |
| 7704 | rs3681849   | 4 | 26609626 | G | G | A | A | A | G |
| 7705 | rs6383319   | 4 | 27109771 | G | G | A | A | A | G |
| 7706 | rs6401234   | 4 | 27434643 | A | A | A | A | A | A |
| 7707 | rs3710785   | 4 | 27910670 | G | G | A | A | A | G |
| 7708 | rs6354547   | 4 | 28107771 | A | A | A | A | A | A |
| 7709 | rs6246362   | 4 | 29421164 | G | G | G | G | G | G |
| 7710 | rs3701432   | 4 | 29487208 | C | C | C | A | C | C |
| 7711 | rs6392393   | 4 | 30267227 | G | G | G | G | G | G |
| 7712 | rs3688049   | 4 | 30505056 | A | A | A | G | G | A |
| 7713 | rs3663744   | 4 | 31215491 | A | A | A | G | A | A |
| 7714 | rs3665020   | 4 | 31215724 | A | A | A | G | A | A |
| 7715 | rs6157431   | 4 | 31287346 | G | G | G | G | G | G |
| 7716 | rs6177140   | 4 | 31796103 | G | G | G | A | G | G |
| 7717 | rs6221374   | 4 | 31810940 | G | G | G | G | G | G |
| 7718 | rs3726592   | 4 | 32219475 | A | A | A | G | A | A |
| 7719 | rs3727171   | 4 | 32219527 | G | G | G | A | G | G |
| 7720 | rs3705575   | 4 | 32224948 | G | G | G | A | G | G |
| 7721 | rs3674908   | 4 | 32441103 | A | A | A | G | A | A |
| 7722 | rs6387912   | 4 | 32668639 | G | G | G | G | G | G |
| 7723 | rs3663938   | 4 | 32787618 | A | A | G | G | G | G |
| 7724 | rs3671973   | 4 | 32807791 | G | G | A | A | A | A |
| 7725 | rs3090673   | 4 | 33072682 | G | G | G | G | G | G |
| 7726 | rs4224427   | 4 | 33253944 | G | G | A | G | A | A |
| 7727 | rs6389474   | 4 | 33315844 | G | G | A | G | A | A |
| 7728 | rs6255328   | 4 | 34017413 | G | G | G | G | G | G |
| 7729 | rs6341443   | 4 | 35103453 | G | G | G | G | G | G |
| 7730 | rs6240486   | 4 | 35513695 | A | A | A | A | A | A |
| 7731 | rs3689359   | 4 | 35654927 | G | A | A | A | A | A |
| 7732 | rs3719299   | 4 | 36221145 | A | G | G | G | G | G |
| 7733 | rs6411840   | 4 | 36646878 | G | G | A | G | G | G |
| 7734 | rs6245131   | 4 | 37141581 | A | A | A | A | A | A |
| 7735 | rs3680929   | 4 | 37477262 | G | A | A | A | A | A |
| 7736 | rs4140307   | 4 | 37528829 | T | A | A | A | A | A |
| 7737 | rs3654708   | 4 | 37675112 | A | T | T | T | T | T |
| 7738 | rs6220425   | 4 | 37861184 | G | G | G | G | G | G |
| 7739 | rs3689942   | 4 | 37917800 | G | A | A | A | A | A |
| 7740 | rs3684104   | 4 | 38414337 | G | G | G | A | A | A |
| 7741 | rs6409228   | 4 | 38767611 | A | A | A | A | A | A |
| 7742 | rs3665192   | 4 | 39174790 | A | A | A | C | C | C |
| 7743 | rs3702229   | 4 | 39247915 | T | T | T | A | A | A |
| 7744 | rs3714457   | 4 | 39258104 | A | A | A | G | G | G |
| 7745 | rs3089966   | 4 | 39357645 | A | A | A | A | A | A |
| 7746 | rs4224429   | 4 | 39542808 | A | A | A | A | A | A |
| 7747 | mCV25401801 | 4 | 45892040 | C | C | C | G | G | G |
| 7748 | rs6326201   | 4 | 39722993 | T | T | T | T | T | T |
| 7749 | rs6222273   | 4 | 40093177 | G | G | G | G | G | G |
| 7750 | rs4224439   | 4 | 40896146 | C | C | C | C | C | C |
| 7751 | rs6344279   | 4 | 41211815 | A | A | A | A | A | A |
| 7752 | rs4224449   | 4 | 41572015 | A | A | A | A | A | A |
| 7753 | rs4138630   | 4 | 41748426 | C | A | A | C | A | A |
| 7754 | rs4224450   | 4 | 41832242 | C | C | C | C | C | C |
| 7755 | rs3090286   | 4 | 41837117 | G | G | G | G | G | G |
| 7756 | rs3023448   | 4 | 41837153 | T | T | T | T | T | T |
| 7757 | mCV23123688 | 4 | 44396289 | G | C | C | C | C | C |
| 7758 | rs3141910   | 4 | 42290028 | G | G | G | A | G | G |
| 7759 | rs3674325   | 4 | 42317351 | G | G | G | A | G | G |
| 7760 | rs3674824   | 4 | 42317387 | A | A | A | G | A | A |
| 7761 | rs4138960   | 4 | 42317437 | T | T | T | A | T | T |
| 7762 | rs3090401   | 4 | 42441968 | G | G | G | G | G | G |
| 7763 | rs3674068   | 4 | 42462482 | A | G | G | G | G | G |
| 7764 | rs4137998   | 4 | 42468309 | A | A | A | G | A | A |
| 7765 | rs6319833   | 4 | 42895715 | G | G | G | G | G | G |
| 7766 | rs6336373   | 4 | 42974778 | G | G | G | A | G | G |
| 7767 | rs4224453   | 4 | 42977245 | G | G | G | G | G | G |

|      |           |   |          |   |      |   |   |   |   |
|------|-----------|---|----------|---|------|---|---|---|---|
| 7768 | rs3689747 | 4 | 43167470 | A | G    | G | A | G | G |
| 7769 | rs3725792 | 4 | 43477894 | G | A    | A | A | G | G |
| 7770 | rs3089096 | 4 | 43624005 | G | G    | G | G | G | G |
| 7771 | rs6392573 | 4 | 43936825 | A | A    | A | A | A | A |
| 7772 | rs4224459 | 4 | 44561663 | A | A    | A | A | A | A |
| 7773 | rs6313392 | 4 | 44568868 | A | NONE | C | A | A | A |
| 7774 | rs3665393 | 4 | 44721094 | G | A    | A | G | G | G |
| 7775 | rs3712230 | 4 | 44733653 | G | G    | G | G | G | G |
| 7776 | rs3668228 | 4 | 44764150 | A | G    | G | A | A | A |
| 7777 | rs3715030 | 4 | 44950097 | A | G    | G | A | G | A |
| 7778 | rs3694836 | 4 | 45217986 | G | G    | G | A | G | A |
| 7779 | rs6274863 | 4 | 45243885 | G | G    | G | G | G | G |
| 7780 | rs4224465 | 4 | 45417180 | A | A    | A | A | A | A |
| 7781 | rs6277768 | 4 | 45590942 | C | C    | C | C | C | C |
| 7782 | rs4224470 | 4 | 45639567 | A | A    | A | A | A | A |
| 7783 | rs3720736 | 4 | 45719580 | G | C    | C | C | C | C |
| 7784 | rs3707178 | 4 | 46281237 | A | G    | G | A | G | A |
| 7785 | rs3678593 | 4 | 46286806 | A | G    | G | A | G | A |
| 7786 | rs3679520 | 4 | 46397274 | A | G    | G | G | G | G |
| 7787 | rs6268280 | 4 | 46628482 | A | A    | A | A | A | A |
| 7788 | rs3663355 | 4 | 47358427 | C | A    | A | A | A | A |
| 7789 | rs6176024 | 4 | 47454282 | G | G    | G | G | G | G |
| 7790 | rs3699346 | 4 | 47809301 | G | A    | A | A | A | A |
| 7791 | rs3089035 | 4 | 48192717 | A | A    | A | A | A | A |
| 7792 | rs6248523 | 4 | 48298996 | A | A    | A | A | A | A |
| 7793 | rs3726023 | 4 | 48551778 | G | A    | A | A | A | A |
| 7794 | rs6316253 | 4 | 49074896 | G | A    | A | A | G | A |
| 7795 | rs3701176 | 4 | 49095375 | A | G    | G | A | A | A |
| 7796 | rs3698382 | 4 | 49140268 | A | G    | G | A | A | A |
| 7797 | rs3677601 | 4 | 49236356 | A | C    | C | A | A | A |
| 7798 | rs6171170 | 4 | 49667453 | G | G    | G | G | G | G |
| 7799 | rs6227828 | 4 | 50661597 | G | G    | G | G | G | G |
| 7800 | rs3676423 | 4 | 51035410 | C | A    | A | C | C | C |
| 7801 | rs6250250 | 4 | 51301901 | T | T    | T | T | T | T |
| 7802 | rs6378640 | 4 | 51598240 | G | G    | G | G | G | G |
| 7803 | rs3673502 | 4 | 52008507 | A | C    | C | A | A | A |
| 7804 | rs8271724 | 4 | 52294378 | T | T    | T | T | T | T |
| 7805 | rs8271462 | 4 | 52334774 | G | G    | G | G | G | G |
| 7806 | rs6246995 | 4 | 52338404 | A | A    | A | A | A | A |
| 7807 | rs8266692 | 4 | 52352531 | A | A    | A | A | A | A |
| 7808 | rs8266691 | 4 | 52354228 | G | G    | G | G | G | G |
| 7809 | rs8258667 | 4 | 52373452 | A | A    | A | A | A | A |
| 7810 | rs8258666 | 4 | 52389392 | G | G    | G | G | G | G |
| 7811 | rs4224486 | 4 | 52506809 | G | G    | G | G | G | G |
| 7812 | rs4139731 | 4 | 52706199 | G | A    | A | G | G | G |
| 7813 | rs3672925 | 4 | 52718080 | T | A    | A | T | T | T |
| 7814 | rs6287441 | 4 | 52957284 | C | C    | C | C | C | C |
| 7815 | rs8258806 | 4 | 53304800 | G | G    | G | G | G | G |
| 7816 | rs8258747 | 4 | 53317106 | C | C    | C | C | C | C |
| 7817 | rs8258726 | 4 | 53332671 | A | A    | A | A | A | A |
| 7818 | rs8258680 | 4 | 53361352 | A | A    | A | A | A | A |
| 7819 | rs3690224 | 4 | 53705442 | A | A    | A | G | A | A |
| 7820 | rs6206997 | 4 | 53707282 | T | T    | T | T | T | T |
| 7821 | rs3661339 | 4 | 53808261 | A | A    | A | G | A | A |
| 7822 | rs3657529 | 4 | 53909507 | T | T    | T | A | T | T |
| 7823 | rs3677770 | 4 | 53964528 | A | A    | A | C | C | A |
| 7824 | rs3715031 | 4 | 53968543 | G | G    | G | C | G | G |
| 7825 | rs6193501 | 4 | 54222818 | T | T    | T | T | T | T |
| 7826 | rs3727011 | 4 | 54341123 | G | G    | G | A | G | G |
| 7827 | rs3699453 | 4 | 54821629 | A | A    | A | T | A | A |
| 7828 | rs3670712 | 4 | 54827183 | G | G    | G | A | G | G |
| 7829 | rs3701061 | 4 | 54831193 | G | G    | G | A | G | G |
| 7830 | rs6412095 | 4 | 55310909 | C | C    | C | C | C | C |
| 7831 | rs6299312 | 4 | 55623580 | C | C    | C | C | C | C |
| 7832 | rs3661536 | 4 | 55796518 | A | A    | A | G | A | G |
| 7833 | rs4224501 | 4 | 56012680 | A | A    | A | G | A | G |
| 7834 | rs4224497 | 4 | 56012863 | A | A    | A | A | A | A |
| 7835 | rs3719355 | 4 | 56025397 | G | G    | G | A | G | A |
| 7836 | rs3726529 | 4 | 56029436 | A | A    | A | G | A | G |
| 7837 | rs3665812 | 4 | 56115059 | A | A    | A | G | A | G |
| 7838 | rs4224504 | 4 | 56135608 | G | G    | G | G | G | G |
| 7839 | rs3664867 | 4 | 56255644 | A | A    | A | G | A | G |
| 7840 | rs3090720 | 4 | 56476332 | G | G    | G | G | G | G |
| 7841 | rs6306804 | 4 | 56841851 | G | G    | G | G | G | G |

|      |             |   |          |      |      |   |   |      |   |
|------|-------------|---|----------|------|------|---|---|------|---|
| 7842 | rs3714431   | 4 | 56977671 | A    | G    | G | G | G    | A |
| 7843 | rs4224506   | 4 | 57124385 | G    | G    | G | G | G    | G |
| 7844 | rs6307352   | 4 | 57546640 | C    | A    | A | A | A    | A |
| 7845 | rs6312158   | 4 | 57587494 | G    | G    | A | A | G    | G |
| 7846 | rs3091157   | 4 | 57645680 | G    | G    | G | G | G    | G |
| 7847 | rs6333919   | 4 | 58087050 | G    | A    | A | G | A    | A |
| 7848 | rs3699688   | 4 | 58225861 | A    | G    | G | A | G    | G |
| 7849 | rs4224523   | 4 | 58310030 | C    | C    | C | C | C    | C |
| 7850 | rs4224515   | 4 | 58310275 | C    | C    | C | A | C    | C |
| 7851 | rs3715009   | 4 | 58656701 | G    | G    | G | A | G    | G |
| 7852 | rs3671277   | 4 | 58712637 | A    | A    | A | G | A    | A |
| 7853 | rs6271356   | 4 | 58944260 | G    | G    | G | G | G    | G |
| 7854 | rs3713888   | 4 | 59015467 | A    | G    | G | G | G    | G |
| 7855 | rs3712541   | 4 | 59103430 | A    | A    | A | G | A    | A |
| 7856 | mCV24089992 | 4 | 63181926 | A    | A    | A | A | T    | T |
| 7857 | rs6406401   | 4 | 60519675 | C    | C    | C | C | C    | C |
| 7858 | rs3690581   | 4 | 61034761 | A    | A    | A | G | A    | G |
| 7859 | rs6284397   | 4 | 61125120 | G    | G    | G | G | G    | G |
| 7860 | rs3694308   | 4 | 61281669 | C    | C    | C | A | C    | C |
| 7861 | rs6206747   | 4 | 61967477 | G    | G    | G | G | G    | G |
| 7862 | mCV24726722 | 4 | 65141101 | A    | G    | A | A | A    | A |
| 7863 | rs6325763   | 4 | 62930919 | A    | A    | A | A | A    | A |
| 7864 | rs8276722   | 4 | 63508070 | G    | G    | G | G | G    | G |
| 7865 | rs8276721   | 4 | 63508212 | A    | A    | A | A | A    | A |
| 7866 | rs6406432   | 4 | 63508911 | G    | G    | G | G | G    | G |
| 7867 | rs8276731   | 4 | 63516923 | G    | G    | G | G | G    | G |
| 7868 | rs8275764   | 4 | 63559045 | G    | G    | G | G | A    | G |
| 7869 | rs6244083   | 4 | 63604779 | A    | A    | A | A | A    | A |
| 7870 | rs8275844   | 4 | 63627490 | C    | C    | C | C | G    | C |
| 7871 | rs3089893   | 4 | 64278800 | A    | A    | A | A | A    | A |
| 7872 | rs6403138   | 4 | 64068548 | A    | A    | A | A | A    | A |
| 7873 | rs3706082   | 4 | 64134751 | A    | A    | A | A | A    | A |
| 7874 | rs6299928   | 4 | 65078608 | G    | A    | G | G | G    | G |
| 7875 | mCV24456251 | 4 | 65355723 | G    | G    | G | G | G    | G |
| 7876 | rs3156208   | 4 | 65500529 | G    | A    | A | A | A    | A |
| 7877 | rs3718146   | 4 | 65556956 | A    | G    | G | G | G    | G |
| 7878 | rs6183656   | 4 | 66039237 | G    | G    | G | G | G    | G |
| 7879 | rs3670404   | 4 | 66109649 | C    | NONE | G | G | G    | G |
| 7880 | rs3692150   | 4 | 66306406 | G    | A    | A | A | A    | A |
| 7881 | rs6410123   | 4 | 67126144 | A    | A    | A | A | A    | A |
| 7882 | rs6198889   | 4 | 67096191 | A    | A    | A | A | A    | A |
| 7883 | rs3688323   | 4 | 68566012 | A    | G    | G | G | G    | G |
| 7884 | rs3710245   | 4 | 68727690 | G    | A    | A | A | A    | A |
| 7885 | rs2020526   | 4 | 68757743 | A    | G    | G | G | G    | G |
| 7886 | rs6156020   | 4 | 69036017 | C    | NONE | G | G | G    | G |
| 7887 | rs3654162   | 4 | 69241096 | A    | A    | A | G | A    | A |
| 7888 | rs3696361   | 4 | 69340056 | A    | G    | G | G | G    | G |
| 7889 | rs4139680   | 4 | 69344093 | C    | A    | A | A | A    | A |
| 7890 | rs3716506   | 4 | 69807290 | G    | A    | A | A | A    | A |
| 7891 | rs3684586   | 4 | 69896726 | G    | A    | A | A | A    | A |
| 7892 | mCV24116550 | 4 | 73037518 | C    | A    | A | A | C    | A |
| 7893 | rs6222684   | 4 | 70467819 | G    | A    | A | A | G    | A |
| 7894 | rs3696858   | 4 | 70489241 | A    | G    | G | G | NONE | G |
| 7895 | rs3672178   | 4 | 70923913 | G    | A    | A | A | A    | A |
| 7896 | rs3705437   | 4 | 71343753 | A    | G    | G | G | G    | G |
| 7897 | rs6355846   | 4 | 71745507 | A    | A    | A | A | A    | A |
| 7898 | rs6177460   | 4 | 72301777 | C    | A    | A | A | C    | A |
| 7899 | rs3722264   | 4 | 72303838 | C    | A    | A | A | C    | A |
| 7900 | rs3683713   | 4 | 72358297 | A    | G    | G | G | A    | G |
| 7901 | rs3654493   | 4 | 73104348 | A    | G    | G | G | A    | G |
| 7902 | rs6232963   | 4 | 73133794 | G    | G    | G | G | G    | G |
| 7903 | rs3723666   | 4 | 73603270 | C    | G    | G | G | C    | G |
| 7904 | rs6217653   | 4 | 74017463 | A    | A    | A | A | A    | A |
| 7905 | rs3704239   | 4 | 74579476 | A    | A    | G | G | A    | G |
| 7906 | rs3706742   | 4 | 74791145 | A    | A    | C | C | A    | C |
| 7907 | rs6409644   | 4 | 74984365 | A    | A    | A | A | A    | A |
| 7908 | rs3658567   | 4 | 75113177 | A    | A    | C | C | A    | C |
| 7909 | rs3708471   | 4 | 75144974 | G    | G    | A | A | A    | A |
| 7910 | rs3672851   | 4 | 75169107 | A    | A    | G | G | G    | G |
| 7911 | mCV24387306 | 4 | 78487615 | G    | A    | G | G | A    | G |
| 7912 | rs6392653   | 4 | 75715655 | NONE | NONE | A | A | A    | A |
| 7913 | rs6181093   | 4 | 76145433 | G    | G    | G | G | G    | G |
| 7914 | rs3672159   | 4 | 76148373 | G    | G    | A | A | A    | A |
| 7915 | rs16262     | 4 | 76240223 | A    | A    | G | G | G    | G |

|      |             |   |          |      |      |   |   |   |   |
|------|-------------|---|----------|------|------|---|---|---|---|
| 7916 | rs3678877   | 4 | 76475498 | A    | A    | G | G | G | G |
| 7917 | rs3704069   | 4 | 76690583 | G    | G    | A | A | A | A |
| 7918 | mCV24050012 | 4 | 79741856 | A    | G    | A | A | A | A |
| 7919 | rs3678562   | 4 | 76845234 | A    | A    | A | G | G | G |
| 7920 | rs3669136   | 4 | 76913204 | C    | C    | A | A | A | A |
| 7921 | rs3676222   | 4 | 76917261 | G    | G    | A | A | A | A |
| 7922 | rs6384996   | 4 | 76924650 | G    | G    | G | G | G | G |
| 7923 | rs6280772   | 4 | 77627839 | G    | G    | G | G | G | G |
| 7924 | rs3692459   | 4 | 77639360 | G    | A    | G | G | A | G |
| 7925 | mCV25398332 | 4 | 81383006 | A    | G    | A | A | G | A |
| 7926 | rs6288187   | 4 | 78907473 | G    | G    | G | G | G | G |
| 7927 | rs6211012   | 4 | 79063020 | A    | A    | A | A | A | A |
| 7928 | rs4224534   | 4 | 79229296 | A    | A    | A | A | A | A |
| 7929 | rs4224533   | 4 | 79229355 | T    | A    | T | T | T | T |
| 7930 | rs2020477   | 4 | 79371964 | G    | A    | G | G | A | G |
| 7931 | rs3708061   | 4 | 79579536 | G    | G    | A | A | G | A |
| 7932 | rs6270012   | 4 | 79711552 | A    | G    | G | G | G | G |
| 7933 | rs6290974   | 4 | 80409897 | A    | A    | A | A | A | A |
| 7934 | rs6258088   | 4 | 80891223 | G    | G    | C | C | G | C |
| 7935 | rs3088838   | 4 | 80908277 | A    | T    | A | A | T | A |
| 7936 | rs3676928   | 4 | 81040027 | A    | A    | G | G | A | G |
| 7937 | rs4224556   | 4 | 81074517 | A    | A    | A | A | A | A |
| 7938 | rs3692661   | 4 | 81081071 | G    | G    | A | A | G | A |
| 7939 | rs3704935   | 4 | 81116669 | C    | A    | A | A | A | A |
| 7940 | rs3699276   | 4 | 81462943 | G    | G    | A | A | G | A |
| 7941 | rs6309721   | 4 | 81528478 | G    | G    | G | G | G | G |
| 7942 | rs3674783   | 4 | 82076032 | A    | A    | G | G | A | G |
| 7943 | rs3700579   | 4 | 82213793 | G    | G    | A | A | G | G |
| 7944 | rs6335385   | 4 | 82670739 | C    | C    | C | C | C | C |
| 7945 | rs6379875   | 4 | 82828564 | A    | A    | A | A | A | A |
| 7946 | rs3661848   | 4 | 83167260 | A    | G    | G | G | G | G |
| 7947 | rs4224569   | 4 | 83663402 | C    | C    | C | C | C | C |
| 7948 | rs6247310   | 4 | 83825940 | A    | A    | A | A | A | A |
| 7949 | rs3712258   | 4 | 84336328 | A    | NONE | G | G | A | G |
| 7950 | rs3717837   | 4 | 84363199 | G    | A    | A | A | G | A |
| 7951 | rs3711477   | 4 | 84506191 | G    | G    | G | A | G | A |
| 7952 | rs3685196   | 4 | 84507910 | G    | G    | G | A | G | A |
| 7953 | rs3707373   | 4 | 85207633 | G    | G    | G | A | G | A |
| 7954 | rs3655671   | 4 | 85542516 | A    | C    | A | C | A | C |
| 7955 | rs6200787   | 4 | 85554799 | A    | A    | A | A | A | A |
| 7956 | rs3659947   | 4 | 85683656 | A    | A    | C | A | C | A |
| 7957 | rs3088625   | 4 | 85985875 | C    | C    | C | C | C | C |
| 7958 | rs6388770   | 4 | 86216391 | G    | G    | G | G | G | G |
| 7959 | rs3687556   | 4 | 86527963 | C    | C    | A | C | A | C |
| 7960 | mCV23972594 | 4 | 90142651 | G    | A    | A | A | A | A |
| 7961 | rs6306627   | 4 | 86968512 | G    | G    | G | G | G | G |
| 7962 | rs3718205   | 4 | 87204885 | C    | NONE | G | G | G | G |
| 7963 | rs3707402   | 4 | 87429049 | G    | G    | A | G | G | G |
| 7964 | rs4224587   | 4 | 87615408 | G    | A    | A | A | G | A |
| 7965 | rs3721333   | 4 | 87835232 | NONE | A    | G | A | A | A |
| 7966 | rs3658697   | 4 | 87878838 | A    | C    | C | C | C | C |
| 7967 | rs3682389   | 4 | 88768107 | G    | G    | A | G | G | G |
| 7968 | rs6294308   | 4 | 88804369 | A    | C    | C | C | C | C |
| 7969 | rs3676999   | 4 | 89060498 | G    | A    | A | A | A | A |
| 7970 | rs3678990   | 4 | 89587013 | T    | A    | A | A | A | A |
| 7971 | rs3712721   | 4 | 89683958 | G    | A    | A | G | A | A |
| 7972 | rs4136370   | 4 | 89684174 | A    | A    | A | C | A | A |
| 7973 | rs6252282   | 4 | 89853730 | A    | A    | A | G | G | G |
| 7974 | rs4224594   | 4 | 89981350 | G    | G    | G | G | G | G |
| 7975 | rs6266191   | 4 | 90448312 | C    | G    | G | G | G | G |
| 7976 | rs6245643   | 4 | 90913070 | A    | G    | G | G | G | G |
| 7977 | rs3686220   | 4 | 91044506 | G    | A    | A | G | G | G |
| 7978 | mCV23916851 | 4 | 94855267 | A    | G    | G | A | A | A |
| 7979 | rs6202006   | 4 | 91160209 | C    | C    | C | C | C | C |
| 7980 | rs6271003   | 4 | 91308682 | NONE | A    | A | A | A | A |
| 7981 | rs3683848   | 4 | 91627051 | A    | C    | C | C | C | C |
| 7982 | rs3657531   | 4 | 91796583 | G    | G    | G | A | A | A |
| 7983 | rs3658161   | 4 | 91796688 | T    | A    | A | T | T | T |
| 7984 | rs3686234   | 4 | 91831178 | A    | A    | A | G | G | G |
| 7985 | rs3694739   | 4 | 92403280 | A    | A    | A | T | T | T |
| 7986 | rs3684103   | 4 | 92572733 | G    | A    | A | A | A | A |
| 7987 | rs3692152   | 4 | 92698220 | A    | G    | G | A | A | A |
| 7988 | rs3663299   | 4 | 92762664 | G    | G    | G | A | G | A |
| 7989 | rs3090406   | 4 | 92825355 | A    | A    | A | A | A | A |

|      |             |   |           |   |   |   |   |   |   |
|------|-------------|---|-----------|---|---|---|---|---|---|
| 7990 | rs3682102   | 4 | 92867874  | A | A | A | G | G | G |
| 7991 | rs6230422   | 4 | 92877333  | A | A | A | A | A | A |
| 7992 | rs3704040   | 4 | 93884466  | A | G | G | A | A | A |
| 7993 | rs3715056   | 4 | 93184069  | G | G | G | A | A | A |
| 7994 | rs4224604   | 4 | 93237510  | A | A | A | A | A | A |
| 7995 | rs3676884   | 4 | 93252122  | A | A | A | G | A | G |
| 7996 | rs6159440   | 4 | 93309734  | G | G | G | G | G | G |
| 7997 | rs3687764   | 4 | 94079664  | C | A | A | A | C | A |
| 7998 | mCV23905937 | 4 | 97833477  | A | G | G | A | A | A |
| 7999 | rs3711973   | 4 | 94235469  | A | G | G | A | A | A |
| 8000 | rs3659791   | 4 | 94278186  | T | A | A | T | T | T |
| 8001 | rs6313390   | 4 | 94402041  | C | C | C | C | C | C |
| 8002 | rs4224615   | 4 | 94624868  | A | A | A | A | A | A |
| 8003 | rs4224623   | 4 | 95343094  | T | T | T | T | T | T |
| 8004 | rs6182361   | 4 | 95084745  | A | A | A | A | A | A |
| 8005 | rs6263284   | 4 | 95333512  | G | G | G | G | G | G |
| 8006 | rs6282784   | 4 | 96423965  | T | T | T | T | T | T |
| 8007 | mCV24740485 | 4 | 100172150 | C | A | A | C | C | C |
| 8008 | rs4224627   | 4 | 96899103  | A | A | A | A | A | A |
| 8009 | rs4224626   | 4 | 96899157  | A | A | A | A | A | A |
| 8010 | rs6255772   | 4 | 97203774  | A | G | G | G | G | G |
| 8011 | rs3705454   | 4 | 97279502  | G | G | G | A | G | G |
| 8012 | rs3670312   | 4 | 97475372  | A | C | C | A | A | A |
| 8013 | rs3671527   | 4 | 97475574  | A | A | A | G | G | A |
| 8014 | rs3680865   | 4 | 97482705  | C | C | C | G | G | C |
| 8015 | rs6299159   | 4 | 97892739  | G | G | G | G | G | G |
| 8016 | rs3682140   | 4 | 98140809  | C | A | A | A | A | A |
| 8017 | mCV22602426 | 4 | 101827515 | C | A | A | C | C | C |
| 8018 | rs3655355   | 4 | 98808683  | A | A | A | A | A | A |
| 8019 | rs4139841   | 4 | 98832184  | A | A | A | G | G | A |
| 8020 | rs3699252   | 4 | 99161083  | T | T | T | A | A | A |
| 8021 | rs3654061   | 4 | 99324599  | C | A | A | C | C | C |
| 8022 | rs6295110   | 4 | 99439814  | A | A | A | A | A | A |
| 8023 | rs6371895   | 4 | 99795531  | G | G | G | G | G | G |
| 8024 | rs3720743   | 4 | 99949965  | A | G | G | A | A | A |
| 8025 | rs6272719   | 4 | 100640566 | G | G | G | G | G | G |
| 8026 | rs3089192   | 4 | 100850043 | G | G | G | G | G | G |
| 8027 | rs6345118   | 4 | 101514488 | A | A | A | A | A | A |
| 8028 | mCV24675121 | 4 | 105107123 | A | A | A | A | G | A |
| 8029 | mCV24675120 | 4 | 105107131 | G | G | G | G | C | G |
| 8030 | mCV24675109 | 4 | 105107401 | G | G | G | G | A | G |
| 8031 | mCV24675108 | 4 | 105111447 | A | A | G | A | G | A |
| 8032 | mCV24675107 | 4 | 105113571 | G | G | A | G | A | G |
| 8033 | mCV24675097 | 4 | 105113740 | C | C | A | C | A | C |
| 8034 | mCV24675096 | 4 | 105113763 | G | G | G | G | A | G |
| 8035 | mCV24675085 | 4 | 102130158 | G | G | G | G | G | G |
| 8036 | mCV24675083 | 4 | 105115473 | A | A | A | A | G | A |
| 8037 | mCV24675073 | 4 | 105115554 | A | A | A | A | G | A |
| 8038 | mCV24675072 | 4 | 105115576 | G | G | G | G | A | G |
| 8039 | mCV24675071 | 4 | 105117917 | G | G | G | G | A | G |
| 8040 | mCV24675061 | 4 | 102134086 | G | G | A | G | A | G |
| 8041 | mCV24675049 | 4 | 105118548 | A | A | G | A | G | A |
| 8042 | mCV24674775 | 4 | 105119055 | A | A | A | A | G | A |
| 8043 | mCV24674764 | 4 | 105119225 | A | A | A | A | T | A |
| 8044 | mCV24674763 | 4 | 105119275 | A | A | A | A | G | A |
| 8045 | mCV24674762 | 4 | 105119428 | G | G | G | G | A | G |
| 8046 | mCV23364082 | 4 | 105121490 | A | A | G | A | G | A |
| 8047 | mCV23364267 | 4 | 105123309 | C | C | C | C | A | C |
| 8048 | mCV23364277 | 4 | 105123701 | G | G | G | G | A | G |
| 8049 | mCV23364278 | 4 | 105124131 | A | A | G | A | G | A |
| 8050 | mCV23364291 | 4 | 105124504 | C | C | C | C | A | C |
| 8051 | mCV23364301 | 4 | 105124843 | C | C | C | C | A | C |
| 8052 | mCV23364302 | 4 | 105125797 | A | A | C | A | C | A |
| 8053 | mCV23364314 | 4 | 105126375 | A | A | A | A | G | A |
| 8054 | mCV23364315 | 4 | 105126933 | A | A | C | A | C | A |
| 8055 | mCV23364334 | 4 | 105126977 | G | G | A | G | A | G |
| 8056 | mCV23364336 | 4 | 102143300 | A | A | G | A | G | A |
| 8057 | mCV23364347 | 4 | 102143302 | A | A | G | A | G | A |
| 8058 | mCV23364348 | 4 | 102143395 | G | G | A | G | A | G |
| 8059 | mCV23364523 | 4 | 105128335 | C | C | A | A | A | C |
| 8060 | mCV23364533 | 4 | 105128934 | G | G | G | G | A | G |
| 8061 | mCV23364534 | 4 | 105128936 | T | T | T | T | A | T |
| 8062 | mCV23364535 | 4 | 105129051 | A | A | G | A | G | A |
| 8063 | mCV23364544 | 4 | 105129330 | C | C | A | C | A | C |

|      |             |   |           |   |      |   |   |   |   |
|------|-------------|---|-----------|---|------|---|---|---|---|
| 8064 | mCV24674738 | 4 | 105132255 | A | A    | G | A | G | A |
| 8065 | mCV24674726 | 4 | 105132422 | A | NONE | G | A | G | A |
| 8066 | mCV24674725 | 4 | 105132615 | A | A    | A | A | G | A |
| 8067 | mCV24674714 | 4 | 105133006 | A | A    | G | A | G | A |
| 8068 | mCV24674713 | 4 | 105134552 | G | G    | G | G | A | G |
| 8069 | mCV24674702 | 4 | 105135101 | A | A    | A | A | G | A |
| 8070 | mCV23882646 | 4 | 105136606 | G | G    | G | G | C | G |
| 8071 | mCV23882645 | 4 | 105137583 | G | G    | G | G | A | G |
| 8072 | mCV23881968 | 4 | 105138998 | G | G    | G | G | A | G |
| 8073 | mCV23881967 | 4 | 105139003 | C | C    | C | C | A | C |
| 8074 | mCV23881959 | 4 | 105139077 | G | G    | G | G | A | G |
| 8075 | mCV23881958 | 4 | 105139137 | G | G    | G | G | A | G |
| 8076 | mCV23881957 | 4 | 105139342 | A | A    | A | A | G | A |
| 8077 | mCV23881949 | 4 | 105140592 | A | A    | A | A | G | A |
| 8078 | mCV23881948 | 4 | 105140758 | A | A    | A | A | G | A |
| 8079 | mCV23881929 | 4 | 105141066 | G | G    | A | A | G | G |
| 8080 | mCV23881916 | 4 | 105142073 | G | G    | G | A | G | G |
| 8081 | mCV23881906 | 4 | 105142232 | G | G    | A | A | A | G |
| 8082 | mCV23881905 | 4 | 102158673 | C | C    | A | A | A | C |
| 8083 | mCV23881631 | 4 | 105143259 | G | G    | G | G | A | G |
| 8084 | mCV23881619 | 4 | 105145529 | A | A    | A | A | T | A |
| 8085 | mCV23881609 | 4 | 105145547 | G | G    | G | G | A | G |
| 8086 | mCV23881607 | 4 | 105145665 | A | A    | G | G | G | A |
| 8087 | rs3723703   | 4 | 101657612 | A | G    | G | A | A | G |
| 8088 | rs3726736   | 4 | 102512069 | G | G    | G | A | G | G |
| 8089 | rs6259114   | 4 | 102518072 | G | G    | G | A | G | G |
| 8090 | rs3695339   | 4 | 102860415 | G | G    | G | A | G | A |
| 8091 | rs6181706   | 4 | 103012113 | A | A    | A | A | A | A |
| 8092 | rs4224632   | 4 | 103150043 | A | A    | A | A | A | A |
| 8093 | rs3662056   | 4 | 103451398 | A | A    | A | A | A | A |
| 8094 | rs3715719   | 4 | 103509041 | C | C    | A | C | C | C |
| 8095 | rs6263289   | 4 | 103544865 | A | A    | G | A | A | A |
| 8096 | mCV23486224 | 4 | 107320896 | G | G    | G | A | A | G |
| 8097 | rs3702979   | 4 | 104232823 | A | A    | G | A | A | A |
| 8098 | rs3664801   | 4 | 104338661 | A | A    | A | G | G | A |
| 8099 | mCV24667075 | 4 | 107860528 | A | A    | T | T | A | A |
| 8100 | rs3088443   | 4 | 104580676 | G | G    | G | G | G | G |
| 8101 | rs3670223   | 4 | 104826849 | G | G    | G | A | A | G |
| 8102 | rs6386224   | 4 | 105007136 | A | A    | A | A | A | A |
| 8103 | rs3089990   | 4 | 105368437 | A | A    | A | A | A | A |
| 8104 | rs3706271   | 4 | 105421171 | G | G    | G | A | A | G |
| 8105 | rs3721642   | 4 | 105571371 | A | A    | G | A | G | A |
| 8106 | rs2020713   | 4 | 105763717 | A | A    | A | A | A | A |
| 8107 | rs2020712   | 4 | 105763801 | A | A    | A | A | A | A |
| 8108 | rs3707370   | 4 | 105894184 | G | G    | A | G | G | G |
| 8109 | rs3670398   | 4 | 106080858 | C | C    | G | C | C | C |
| 8110 | rs3709496   | 4 | 106176999 | G | G    | A | G | G | G |
| 8111 | rs4224656   | 4 | 106222434 | T | T    | T | T | T | T |
| 8112 | rs4224650   | 4 | 106222706 | A | A    | A | A | A | A |
| 8113 | rs6184116   | 4 | 106550698 | C | C    | C | C | C | C |
| 8114 | rs4224682   | 4 | 106746452 | A | A    | A | A | A | A |
| 8115 | rs3664637   | 4 | 106910140 | C | C    | C | A | C | C |
| 8116 | mCV22668736 | 4 | 111006185 | T | T    | T | A | T | T |
| 8117 | rs6226080   | 4 | 107056497 | A | A    | A | G | A | A |
| 8118 | rs4224693   | 4 | 107406921 | A | A    | A | A | A | A |
| 8119 | rs6337035   | 4 | 107411139 | G | G    | G | G | G | G |
| 8120 | rs3710865   | 4 | 107443942 | A | A    | G | A | A | A |
| 8121 | rs3695162   | 4 | 107621073 | T | T    | A | A | T | T |
| 8122 | rs4221960   | 4 | 107798885 | A | A    | G | G | A | A |
| 8123 | rs4221958   | 4 | 107799065 | A | A    | A | A | A | A |
| 8124 | rs6289137   | 4 | 108244509 | T | T    | T | T | T | T |
| 8125 | rs3710617   | 4 | 108380717 | G | G    | A | A | G | G |
| 8126 | rs6301922   | 4 | 108585619 | G | G    | G | G | G | G |
| 8127 | rs6193537   | 4 | 108912026 | G | G    | A | G | G | G |
| 8128 | mCV25387389 | 4 | 103636144 | A | A    | G | A | G | A |
| 8129 | rs3670382   | 4 | 109186770 | A | A    | A | A | A | A |
| 8130 | rs3686650   | 4 | 109200409 | A | A    | C | A | A | A |
| 8131 | rs6319794   | 4 | 109376235 | A | A    | A | A | A | A |
| 8132 | rs3659850   | 4 | 109639885 | A | A    | G | G | A | A |
| 8133 | rs3706233   | 4 | 109661745 | G | G    | A | G | G | G |
| 8134 | rs3022995   | 4 | 109717402 | G | G    | G | G | G | G |
| 8135 | rs3709486   | 4 | 109968331 | G | G    | A | G | G | G |
| 8136 | rs6393361   | 4 | 110127252 | A | A    | A | A | A | A |
| 8137 | mCV23198207 | 4 | 113411887 | C | A    | A | C | A | A |

|      |             |   |           |      |   |   |   |   |   |
|------|-------------|---|-----------|------|---|---|---|---|---|
| 8138 | rs3708362   | 4 | 110391532 | G    | G | G | A | G | G |
| 8139 | rs3725330   | 4 | 111058533 | G    | G | G | A | G | G |
| 8140 | rs3726406   | 4 | 111058678 | A    | A | A | A | A | A |
| 8141 | mCV24303778 | 4 | 114598120 | A    | G | G | A | G | A |
| 8142 | rs3687391   | 4 | 112710379 | A    | A | C | C | A | A |
| 8143 | rs6235260   | 4 | 112826940 | G    | G | G | G | G | G |
| 8144 | rs3722041   | 4 | 112859123 | C    | C | A | C | C | C |
| 8145 | mCV24645877 | 4 | 116109217 | G    | A | G | G | A | G |
| 8146 | rs3670129   | 4 | 113278448 | A    | A | G | A | A | G |
| 8147 | rs8249610   | 4 | 113832407 | G    | G | G | G | G | G |
| 8148 | rs3022993   | 4 | 113832609 | G    | G | A | G | G | A |
| 8149 | rs8239732   | 4 | 113839267 | A    | A | G | A | A | G |
| 8150 | rs8247950   | 4 | 113840561 | G    | G | A | G | G | A |
| 8151 | rs6173535   | 4 | 114201322 | A    | A | A | A | A | A |
| 8152 | rs8239976   | 4 | 114350886 | T    | T | T | T | T | T |
| 8153 | rs8236540   | 4 | 115044756 | G    | G | G | G | G | G |
| 8154 | rs6249803   | 4 | 115095280 | G    | A | A | G | A | A |
| 8155 | mCV24264185 | 4 | 118299804 | A    | A | A | C | A | A |
| 8156 | rs3689378   | 4 | 115293106 | G    | G | A | G | G | A |
| 8157 | rs4224732   | 4 | 115630977 | G    | G | G | G | G | G |
| 8158 | rs3696331   | 4 | 115756451 | A    | A | G | A | A | G |
| 8159 | rs3724818   | 4 | 115842883 | G    | G | G | A | G | G |
| 8160 | rs6172225   | 4 | 115918128 | G    | G | G | G | G | G |
| 8161 | rs3699061   | 4 | 115937492 | A    | G | G | A | G | G |
| 8162 | rs6379844   | 4 | 116247572 | C    | C | C | C | C | C |
| 8163 | rs3672234   | 4 | 116414859 | G    | G | G | A | G | G |
| 8164 | rs3692563   | 4 | 116737689 | A    | A | A | G | A | A |
| 8165 | rs3159805   | 4 | 117028968 | C    | C | C | C | C | C |
| 8166 | mCV22634282 | 4 | 121090958 | G    | A | A | A | A | G |
| 8167 | rs6195446   | 4 | 117332676 | A    | G | A | A | G | A |
| 8168 | rs3661670   | 4 | 117359996 | G    | G | A | G | G | A |
| 8169 | rs3664245   | 4 | 117621371 | G    | G | G | G | G | G |
| 8170 | rs3695349   | 4 | 117643049 | G    | G | A | G | G | A |
| 8171 | rs3688968   | 4 | 118066883 | NONE | G | G | A | G | A |
| 8172 | rs3726907   | 4 | 118140601 | C    | C | A | C | C | C |
| 8173 | rs6180597   | 4 | 118162445 | A    | A | A | A | A | A |
| 8174 | rs6333351   | 4 | 118831743 | G    | G | G | G | G | G |
| 8175 | rs3678308   | 4 | 119089771 | G    | G | G | A | G | G |
| 8176 | rs4224744   | 4 | 119149097 | G    | G | G | A | G | A |
| 8177 | rs4224745   | 4 | 119149165 | G    | G | A | G | G | G |
| 8178 | rs3675136   | 4 | 119381586 | G    | G | G | A | A | G |
| 8179 | rs6338910   | 4 | 119399740 | A    | A | A | A | A | A |
| 8180 | rs3675629   | 4 | 119404209 | A    | A | A | C | A | A |
| 8181 | rs8276607   | 4 | 119420442 | A    | A | A | A | A | A |
| 8182 | rs8276586   | 4 | 119427150 | A    | A | A | A | A | A |
| 8183 | rs4224746   | 4 | 121227093 | A    | A | A | A | A | A |
| 8184 | rs6296781   | 4 | 121193166 | A    | A | A | A | A | A |
| 8185 | rs3702881   | 4 | 121182316 | G    | A | A | A | A | G |
| 8186 | rs4224757   | 4 | 122277336 | G    | G | G | G | G | G |
| 8187 | rs3682864   | 4 | 122316985 | G    | A | G | A | G | A |
| 8188 | rs6207969   | 4 | 122542570 | G    | G | G | G | G | G |
| 8189 | rs3714811   | 4 | 122578236 | A    | A | A | G | A | A |
| 8190 | rs3666419   | 4 | 122592298 | G    | G | G | A | G | G |
| 8191 | rs3670142   | 4 | 123224033 | A    | G | A | G | A | G |
| 8192 | rs6191300   | 4 | 123227617 | A    | A | A | A | A | G |
| 8193 | rs3671259   | 4 | 123272188 | A    | A | A | G | A | G |
| 8194 | rs6276600   | 4 | 123612958 | A    | A | A | A | A | A |
| 8195 | rs3704486   | 4 | 123958705 | A    | C | A | C | A | C |
| 8196 | rs4224765   | 4 | 124684143 | G    | G | G | G | G | G |
| 8197 | rs6333428   | 4 | 124743553 | C    | C | C | C | C | C |
| 8198 | rs3666537   | 4 | 124843162 | A    | A | T | A | T | A |
| 8199 | rs3667597   | 4 | 124843286 | C    | C | A | C | A | C |
| 8200 | rs3692521   | 4 | 125087597 | A    | G | G | A | G | G |
| 8201 | rs4224769   | 4 | 125232244 | C    | A | C | C | C | C |
| 8202 | rs6171443   | 4 | 125378697 | A    | A | A | A | A | A |
| 8203 | rs3023000   | 4 | 125681860 | C    | C | C | C | C | C |
| 8204 | rs4224772   | 4 | 125683315 | A    | A | A | A | A | A |
| 8205 | rs4224771   | 4 | 125683489 | A    | A | A | A | A | G |
| 8206 | mCV24231492 | 4 | 129874356 | C    | A | A | A | A | C |
| 8207 | rs3717809   | 4 | 126378807 | A    | G | G | A | G | A |
| 8208 | rs6360227   | 4 | 126486689 | A    | A | A | A | A | A |
| 8209 | rs3721916   | 4 | 126503138 | G    | A | A | A | A | G |
| 8210 | rs3711319   | 4 | 126893224 | A    | A | A | T | A | T |
| 8211 | rs4138996   | 4 | 127247890 | A    | G | G | G | G | G |

|      |             |   |           |   |   |   |   |   |      |
|------|-------------|---|-----------|---|---|---|---|---|------|
| 8212 | rs4224785   | 4 | 127281725 | A | A | A | A | A | A    |
| 8213 | rs3023007   | 4 | 127922145 | A | A | A | C | A | A    |
| 8214 | rs3023009   | 4 | 127942488 | A | A | A | G | A | A    |
| 8215 | rs4139270   | 4 | 127994032 | G | G | G | A | G | G    |
| 8216 | rs3708285   | 4 | 128000012 | A | A | A | G | A | A    |
| 8217 | rs6355837   | 4 | 128083691 | C | C | C | A | C | C    |
| 8218 | rs3661158   | 4 | 128300912 | T | T | T | A | T | T    |
| 8219 | rs3698956   | 4 | 128468831 | A | G | G | G | G | NONE |
| 8220 | rs8272651   | 4 | 128536032 | A | A | A | A | A | A    |
| 8221 | rs8274322   | 4 | 128538100 | G | A | A | A | A | A    |
| 8222 | rs8236541   | 4 | 129086832 | T | T | T | T | T | T    |
| 8223 | rs8236544   | 4 | 128543858 | A | A | A | A | A | A    |
| 8224 | rs6370137   | 4 | 128885948 | T | T | T | T | T | T    |
| 8225 | rs3673061   | 4 | 129606752 | G | A | A | A | A | A    |
| 8226 | rs6206222   | 4 | 129915072 | A | A | A | A | A | A    |
| 8227 | rs3089399   | 4 | 130078205 | A | A | A | A | A | A    |
| 8228 | rs6218778   | 4 | 130258948 | C | C | C | C | C | C    |
| 8229 | rs3696551   | 4 | 130943710 | G | A | A | A | A | G    |
| 8230 | rs3664871   | 4 | 131307526 | G | A | A | G | A | G    |
| 8231 | rs6235031   | 4 | 131343591 | G | A | A | G | A | G    |
| 8232 | rs3721169   | 4 | 131381162 | C | A | A | C | A | C    |
| 8233 | rs4224808   | 4 | 131453665 | G | C | C | C | G | G    |
| 8234 | rs4224809   | 4 | 131453707 | C | C | C | C | C | C    |
| 8235 | rs6243362   | 4 | 131499407 | G | G | G | G | G | G    |
| 8236 | mCV24210995 | 4 | 135242958 | G | A | A | G | A | A    |
| 8237 | rs6297037   | 4 | 131734739 | C | C | C | G | C | C    |
| 8238 | rs3697583   | 4 | 131942653 | G | G | G | A | G | G    |
| 8239 | rs3671045   | 4 | 132166253 | G | G | G | A | G | G    |
| 8240 | rs3682399   | 4 | 132339612 | G | G | G | A | G | G    |
| 8241 | rs4224814   | 4 | 132458351 | C | C | C | C | C | C    |
| 8242 | rs6404906   | 4 | 132462369 | C | C | C | G | C | C    |
| 8243 | rs3680937   | 4 | 132707663 | C | C | C | A | C | C    |
| 8244 | rs6368842   | 4 | 133472901 | A | A | A | A | A | A    |
| 8245 | mCV22976835 | 4 | 134813801 | A | G | G | G | G | G    |
| 8246 | rs3663950   | 4 | 134187547 | G | G | A | A | G | G    |
| 8247 | rs6353992   | 4 | 134308567 | C | C | G | G | G | G    |
| 8248 | rs4224831   | 4 | 134902093 | G | A | A | G | A | A    |
| 8249 | rs6381419   | 4 | 135148164 | G | G | G | G | G | G    |
| 8250 | rs4224836   | 4 | 135347941 | A | G | G | A | G | G    |
| 8251 | rs4224854   | 4 | 135677363 | A | A | A | A | A | A    |
| 8252 | rs4224852   | 4 | 135677422 | G | A | A | G | A | A    |
| 8253 | rs4224841   | 4 | 135677675 | A | A | A | A | A | A    |
| 8254 | rs6378257   | 4 | 135933671 | A | G | G | A | G | G    |
| 8255 | rs3661463   | 4 | 136080850 | A | G | G | A | G | G    |
| 8256 | rs4224858   | 4 | 136115446 | G | G | G | G | G | G    |
| 8257 | rs3661970   | 4 | 136604410 | G | A | A | G | A | A    |
| 8258 | rs4224860   | 4 | 136661764 | G | G | G | G | G | G    |
| 8259 | rs4224864   | 4 | 136662000 | G | A | A | G | A | A    |
| 8260 | rs6350149   | 4 | 136763274 | A | C | C | A | C | C    |
| 8261 | rs3703479   | 4 | 136844302 | G | A | A | G | A | A    |
| 8262 | rs3090961   | 4 | 137197698 | A | A | A | A | A | A    |
| 8263 | rs6340721   | 4 | 137318349 | A | A | G | A | G | G    |
| 8264 | rs3685316   | 4 | 137349649 | G | G | A | G | A | A    |
| 8265 | rs4224870   | 4 | 137512969 | A | A | G | A | G | G    |
| 8266 | rs3686214   | 4 | 138010250 | G | G | A | G | A | A    |
| 8267 | rs3686283   | 4 | 138010276 | G | G | A | G | A | A    |
| 8268 | rs6323117   | 4 | 138056905 | T | T | T | T | T | T    |
| 8269 | rs6386918   | 4 | 138224144 | A | A | G | A | G | G    |
| 8270 | rs3718952   | 4 | 138506526 | G | G | A | G | A | A    |
| 8271 | mCV23620754 | 4 | 138704812 | A | A | A | A | G | G    |
| 8272 | mCV23723677 | 4 | 138931510 | G | G | G | G | A | A    |
| 8273 | rs3724911   | 4 | 138982190 | T | T | T | T | A | A    |
| 8274 | rs3657367   | 4 | 139122755 | A | G | G | G | G | A    |
| 8275 | rs4232380   | 4 | 139463518 | A | A | A | A | A | A    |
| 8276 | rs6382504   | 4 | 139523933 | G | G | G | G | G | G    |
| 8277 | rs3722135   | 4 | 139700222 | G | C | C | C | G | G    |
| 8278 | rs3023026   | 4 | 139818353 | G | A | A | A | G | G    |
| 8279 | rs3688566   | 4 | 140026440 | G | A | G | A | A | A    |
| 8280 | rs6215302   | 4 | 140110739 | G | A | G | A | A | A    |
| 8281 | rs3659226   | 4 | 140162829 | A | A | G | A | A | A    |
| 8282 | rs8260738   | 4 | 140282474 | G | G | A | G | G | G    |
| 8283 | rs6250787   | 4 | 140385565 | G | A | A | A | G | G    |
| 8284 | rs4224893   | 4 | 140559314 | G | G | G | G | G | G    |
| 8285 | rs4224894   | 4 | 140559352 | G | G | C | G | G | G    |



|      |             |   |           |   |      |   |   |   |   |
|------|-------------|---|-----------|---|------|---|---|---|---|
| 8286 | rs3695719   | 4 | 140800805 | A | G    | G | G | G | G |
| 8287 | rs3719891   | 4 | 140961583 | A | A    | G | A | G | G |
| 8288 | rs3720051   | 4 | 140961672 | G | G    | A | G | A | A |
| 8289 | rs3684126   | 4 | 141244229 | A | A    | T | A | T | T |
| 8290 | rs3718552   | 4 | 141332792 | G | G    | G | A | G | G |
| 8291 | rs3023025   | 4 | 141638718 | T | A    | A | A | T | T |
| 8292 | rs6316136   | 4 | 141826127 | G | A    | A | A | G | G |
| 8293 | mCV22757103 | 4 | 142788270 | A | C    | C | C | A | A |
| 8294 | mCV24105383 | 4 | 143338813 | A | C    | A | C | A | C |
| 8295 | rs4224919   | 4 | 143308550 | A | G    | A | G | A | G |
| 8296 | rs4136314   | 4 | 143380772 | A | G    | A | G | G | G |
| 8297 | rs6233441   | 4 | 143381201 | G | G    | G | G | G | G |
| 8298 | rs3694109   | 4 | 143654943 | G | A    | G | A | G | A |
| 8299 | rs6230717   | 4 | 145785696 | G | C    | G | C | G | C |
| 8300 | rs4224932   | 4 | 145795708 | G | G    | G | G | G | G |
| 8301 | rs4224929   | 4 | 145796031 | G | G    | G | G | G | G |
| 8302 | rs3720542   | 4 | 145888240 | A | G    | A | G | A | G |
| 8303 | rs3724210   | 4 | 145898312 | G | C    | G | C | G | C |
| 8304 | rs3693400   | 4 | 145932485 | A | G    | A | G | A | G |
| 8305 | rs3675987   | 4 | 146171058 | G | G    | G | A | G | A |
| 8306 | rs6306557   | 4 | 146280236 | A | A    | A | G | A | G |
| 8307 | rs3165478   | 4 | 146494437 | G | G    | G | A | A | A |
| 8308 | mCV22914328 | 4 | 144478532 | G | G    | G | G | G | G |
| 8309 | rs4137378   | 4 | 146556633 | G | G    | G | A | G | A |
| 8310 | rs3669806   | 4 | 146708911 | A | A    | A | G | A | G |
| 8311 | rs3715154   | 4 | 146726644 | A | G    | A | G | A | G |
| 8312 | rs3713685   | 4 | 147025784 | G | G    | G | A | G | A |
| 8313 | rs3702606   | 4 | 147272985 | A | G    | A | G | A | A |
| 8314 | rs3720325   | 4 | 147647868 | A | G    | A | A | A | G |
| 8315 | rs3697097   | 4 | 148283295 | A | A    | A | G | A | A |
| 8316 | rs6223564   | 4 | 148304705 | C | C    | C | A | C | C |
| 8317 | rs3695426   | 4 | 148339149 | C | A    | C | C | C | C |
| 8318 | rs4140148   | 4 | 148362291 | C | C    | C | G | C | C |
| 8319 | rs3725019   | 4 | 148702440 | A | G    | G | G | G | G |
| 8320 | rs4224962   | 4 | 148945757 | A | A    | A | A | A | A |
| 8321 | rs4224961   | 4 | 148946009 | G | G    | G | G | G | G |
| 8322 | rs3686555   | 4 | 148963391 | A | G    | A | G | A | A |
| 8323 | rs6358921   | 4 | 148971795 | A | NONE | A | G | A | A |
| 8324 | rs3680006   | 4 | 149383989 | G | A    | G | A | G | G |
| 8325 | rs6268364   | 4 | 149902058 | G | A    | A | A | A | A |
| 8326 | rs4224986   | 4 | 150171120 | G | G    | G | G | G | G |
| 8327 | rs6256662   | 4 | 150187273 | G | A    | A | A | A | A |
| 8328 | rs3686348   | 4 | 150897581 | A | G    | G | G | G | G |
| 8329 | rs3667663   | 4 | 150923668 | G | A    | A | A | A | A |
| 8330 | rs3668413   | 4 | 150923815 | G | A    | A | A | A | A |
| 8331 | rs6378384   | 4 | 151446994 | G | A    | A | A | A | A |
| 8332 | rs6181146   | 4 | 151939989 | G | G    | G | A | G | G |
| 8333 | rs4139190   | 4 | 152060247 | A | T    | T | T | T | T |
| 8334 | rs3670828   | 4 | 152211118 | A | A    | A | T | A | A |
| 8335 | rs3693138   | 4 | 152591465 | A | A    | A | C | A | A |
| 8336 | rs6263119   | 4 | 152919587 | C | C    | C | A | C | C |
| 8337 | rs4224988   | 4 | 152959953 | G | G    | G | G | G | G |
| 8338 | rs3696703   | 4 | 153111615 | A | A    | A | G | A | G |
| 8339 | rs3091009   | 4 | 153709972 | A | A    | A | A | A | A |
| 8340 | rs3091010   | 4 | 153709974 | A | A    | A | A | A | A |
| 8341 | rs3720634   | 4 | 153793536 | A | A    | A | G | A | A |
| 8342 | rs3693087   | 4 | 154007691 | G | G    | G | A | G | G |
| 8343 | rs6279100   | 4 | 154069720 | G | G    | G | A | G | G |
| 8344 | mCV24977441 | 4 | 153708022 | A | A    | A | G | A | A |
| 8345 | mCV24977452 | 4 | 153708070 | G | G    | G | A | G | G |
| 8346 | mCV24977637 | 4 | 153710692 | G | G    | G | A | G | G |
| 8347 | mCV24977638 | 4 | 153710738 | A | A    | A | G | A | A |
| 8348 | mCV24977639 | 4 | 153710793 | G | G    | G | A | G | G |
| 8349 | rs3705659   | 5 | 134508741 | C | C    | C | A | C | C |
| 8350 | rs8259990   | 5 | 8863543   | G | G    | G | G | G | G |
| 8351 | rs6332539   | 5 | 81683053  | G | A    | G | A | G | G |
| 8352 | rs8268905   | 5 | 8864490   | A | A    | A | A | A | A |
| 8353 | rs4225123   | 5 | 28674211  | A | A    | A | A | A | A |
| 8354 | rs3688859   | 5 | 96948957  | C | C    | C | A | C | C |
| 8355 | rs8260004   | 5 | 8865410   | A | A    | A | A | A | A |
| 8356 | rs3656462   | 5 | 66391242  | A | A    | A | A | A | A |
| 8357 | rs4225290   | 5 | 74884361  | G | G    | A | A | A | G |
| 8358 | rs8280080   | 5 | 8901038   | G | G    | G | G | G | G |
| 8359 | rs6152903   | 5 | 6675515   | A | A    | A | T | A | A |

|      |             |    |          |   |      |   |   |   |   |
|------|-------------|----|----------|---|------|---|---|---|---|
| 8360 | rs3666675   | 5  | 25543809 | G | A    | A | G | G | A |
| 8361 | rs3707823   | 5  | 15379563 | A | G    | G | G | G | G |
| 8362 | rs3719870   | 5  | 65332177 | A | A    | A | G | A | G |
| 8363 | rs3698071   | 5  | 9497540  | A | G    | G | G | G | G |
| 8364 | rs4173745   | 16 | 36388382 | C | C    | G | C | G | C |
| 8365 | rs3153753   | 5  | 74875328 | G | G    | G | A | G | G |
| 8366 | mCV23404305 | 5  | 5274596  | A | A    | A | G | A | A |
| 8367 | rs4225034   | 5  | 3589864  | G | G    | G | G | G | G |
| 8368 | rs6189262   | 5  | 3806733  | G | G    | G | G | G | G |
| 8369 | rs3674947   | 5  | 3941458  | G | G    | G | A | G | G |
| 8370 | rs3670745   | 5  | 4013495  | G | G    | G | C | G | G |
| 8371 | rs4225033   | 5  | 4088312  | A | G    | G | G | G | G |
| 8372 | rs3713790   | 5  | 4092754  | C | G    | G | G | G | G |
| 8373 | rs3666313   | 5  | 4812113  | A | G    | G | G | G | G |
| 8374 | rs6190354   | 5  | 4865632  | C | A    | A | A | A | A |
| 8375 | rs3709655   | 5  | 5044871  | G | G    | G | A | G | G |
| 8376 | rs6246086   | 5  | 5134008  | T | T    | T | A | T | T |
| 8377 | mCV24178939 | 5  | 8292817  | A | G    | G | G | G | G |
| 8378 | rs3667728   | 5  | 8374626  | C | A    | A | A | A | A |
| 8379 | rs6402980   | 5  | 5438798  | C | C    | C | G | C | C |
| 8380 | rs3714332   | 5  | 5438984  | G | G    | G | A | G | G |
| 8381 | rs4225021   | 5  | 5587957  | A | G    | G | G | G | A |
| 8382 | mCV22641745 | 5  | 6395635  | A | NONE | C | C | C | C |
| 8383 | rs6354478   | 5  | 6246355  | G | A    | A | A | A | A |
| 8384 | rs3672328   | 5  | 7246940  | A | A    | A | A | A | A |
| 8385 | rs3671855   | 5  | 7246966  | G | A    | A | G | A | G |
| 8386 | rs6245801   | 5  | 7469880  | A | G    | G | G | G | A |
| 8387 | rs3666998   | 5  | 6963830  | A | G    | G | A | G | A |
| 8388 | rs3089100   | 5  | 6839681  | G | G    | G | G | G | G |
| 8389 | rs3709946   | 5  | 6799048  | A | G    | G | G | G | A |
| 8390 | rs3023033   | 5  | 7172256  | T | A    | A | T | A | T |
| 8391 | rs3718443   | 5  | 7881689  | A | G    | G | G | G | G |
| 8392 | mCV25347777 | 5  | 15986460 | G | A    | A | A | A | A |
| 8393 | rs6222248   | 5  | 7900641  | G | A    | A | A | A | A |
| 8394 | rs8266805   | 5  | 8813167  | A | A    | A | A | A | A |
| 8395 | rs8237256   | 5  | 8826911  | A | A    | A | A | A | A |
| 8396 | rs6353486   | 5  | 8852362  | G | G    | G | G | G | G |
| 8397 | rs8237291   | 5  | 8854148  | G | G    | G | G | G | G |
| 8398 | rs6410022   | 5  | 8917993  | G | G    | G | G | G | G |
| 8399 | rs8277484   | 5  | 8929252  | A | A    | A | A | A | A |
| 8400 | rs3692422   | 5  | 9101440  | G | A    | A | A | A | A |
| 8401 | rs3704546   | 5  | 10347575 | G | G    | G | G | G | G |
| 8402 | rs3676096   | 5  | 10677032 | A | G    | G | G | G | G |
| 8403 | rs6232180   | 5  | 10769121 | T | T    | T | T | T | T |
| 8404 | rs3659713   | 5  | 11081268 | A | G    | G | G | G | G |
| 8405 | rs3708118   | 5  | 11358555 | A | G    | G | A | A | A |
| 8406 | rs3714258   | 5  | 11417181 | A | A    | A | G | A | A |
| 8407 | rs6285349   | 5  | 11441518 | A | A    | A | A | A | A |
| 8408 | rs6321461   | 5  | 11718088 | G | G    | G | G | G | G |
| 8409 | mCV22832219 | 5  | 15698089 | A | A    | A | A | G | A |
| 8410 | rs3660027   | 5  | 12010866 | A | G    | G | G | G | G |
| 8411 | rs3701181   | 5  | 13194121 | C | A    | A | A | A | A |
| 8412 | rs6404215   | 5  | 13058225 | A | A    | A | C | A | A |
| 8413 | mCV23262554 | 5  | 17124962 | A | T    | T | T | T | T |
| 8414 | rs3687916   | 5  | 13389454 | A | A    | A | G | A | A |
| 8415 | rs6353097   | 5  | 13875606 | G | A    | A | A | G | G |
| 8416 | rs3676443   | 5  | 13905415 | G | C    | C | C | G | G |
| 8417 | rs3701972   | 5  | 14242321 | G | A    | A | A | A | A |
| 8418 | rs6356492   | 5  | 14453277 | A | A    | A | A | A | A |
| 8419 | rs6248947   | 5  | 15202306 | T | T    | T | T | T | T |
| 8420 | rs6214590   | 5  | 15540280 | A | G    | G | G | G | G |
| 8421 | rs6297493   | 5  | 15890773 | G | G    | G | G | G | G |
| 8422 | rs3684715   | 5  | 16423235 | A | G    | G | G | G | G |
| 8423 | rs3681166   | 5  | 16589143 | A | G    | G | G | G | G |
| 8424 | rs4225047   | 5  | 16627946 | G | G    | G | G | G | G |
| 8425 | rs4225046   | 5  | 16627972 | A | A    | A | A | A | A |
| 8426 | rs3709325   | 5  | 16691950 | A | G    | G | G | G | G |
| 8427 | rs6178561   | 5  | 16743186 | C | C    | C | C | C | C |
| 8428 | rs4225050   | 5  | 17948714 | C | C    | C | C | C | C |
| 8429 | rs4225063   | 5  | 17948328 | G | G    | G | G | G | G |
| 8430 | rs6207468   | 5  | 17786361 | A | A    | A | A | A | A |
| 8431 | rs3671075   | 5  | 18495485 | A | G    | G | G | G | G |
| 8432 | mCV22781030 | 5  | 22537262 | A | G    | G | G | A | A |
| 8433 | rs6408115   | 5  | 52449828 | A | A    | A | A | A | A |

|      |             |   |          |   |      |   |   |   |   |
|------|-------------|---|----------|---|------|---|---|---|---|
| 8434 | rs3697291   | 5 | 18676327 | A | G    | G | G | G | G |
| 8435 | rs4225066   | 5 | 19344217 | G | G    | G | G | G | G |
| 8436 | rs6194519   | 5 | 19193683 | A | A    | A | A | A | A |
| 8437 | rs3664312   | 5 | 19185678 | A | G    | G | G | G | G |
| 8438 | rs4225084   | 5 | 20041999 | G | G    | G | G | G | G |
| 8439 | rs6244687   | 5 | 20178223 | G | G    | G | C | C | C |
| 8440 | rs3665481   | 5 | 20202897 | G | G    | G | A | A | A |
| 8441 | rs3676378   | 5 | 20385265 | T | A    | A | A | A | A |
| 8442 | rs3671575   | 5 | 20646278 | A | A    | A | G | A | G |
| 8443 | rs3690874   | 5 | 20653698 | A | A    | A | G | A | G |
| 8444 | rs6294047   | 5 | 20815246 | C | C    | C | C | C | C |
| 8445 | rs6255331   | 5 | 21311602 | C | C    | C | C | C | C |
| 8446 | rs3724053   | 5 | 21453217 | A | G    | G | G | A | A |
| 8447 | rs3720911   | 5 | 21951785 | A | G    | G | G | A | A |
| 8448 | rs3654251   | 5 | 22375271 | A | G    | G | G | A | A |
| 8449 | rs3090417   | 5 | 22630311 | C | A    | A | A | C | C |
| 8450 | rs3089039   | 5 | 22756981 | A | A    | A | A | A | A |
| 8451 | rs4225096   | 5 | 22807243 | A | A    | A | A | C | A |
| 8452 | rs6260804   | 5 | 22901492 | T | T    | T | T | A | T |
| 8453 | rs3023039   | 5 | 23287553 | A | A    | A | A | G | A |
| 8454 | rs3706626   | 5 | 23524916 | A | G    | G | A | G | A |
| 8455 | rs6347403   | 5 | 23607213 | T | T    | T | A | A | A |
| 8456 | rs4225108   | 5 | 23662405 | G | G    | G | G | G | G |
| 8457 | rs4225109   | 5 | 23662465 | G | A    | A | G | G | G |
| 8458 | rs3676101   | 5 | 24582694 | A | G    | G | G | G | G |
| 8459 | rs3713077   | 5 | 24619890 | T | A    | A | T | T | A |
| 8460 | rs6275634   | 5 | 24727380 | A | C    | C | C | C | C |
| 8461 | rs3705209   | 5 | 24811094 | A | G    | G | A | A | G |
| 8462 | rs6309009   | 5 | 25210041 | G | C    | C | C | C | C |
| 8463 | rs3666952   | 5 | 25412948 | A | G    | G | G | G | G |
| 8464 | rs3699500   | 5 | 25485429 | A | G    | G | A | A | G |
| 8465 | rs3088839   | 5 | 26109156 | G | G    | G | G | G | G |
| 8466 | rs4225113   | 5 | 26232631 | G | G    | G | G | G | G |
| 8467 | rs4225111   | 5 | 26232591 | A | A    | A | A | A | A |
| 8468 | rs3715679   | 5 | 26228802 | A | A    | A | C | C | C |
| 8469 | rs3668113   | 5 | 26583853 | C | C    | C | G | G | C |
| 8470 | rs6159963   | 5 | 26815473 | G | G    | G | A | A | G |
| 8471 | rs3671062   | 5 | 26763624 | G | A    | A | G | G | A |
| 8472 | rs3670423   | 5 | 26763519 | A | G    | G | A | A | G |
| 8473 | rs3700261   | 5 | 26758056 | C | A    | A | C | C | A |
| 8474 | rs3718551   | 5 | 26873766 | T | A    | A | T | T | A |
| 8475 | rs3680434   | 5 | 27162034 | C | A    | A | C | C | A |
| 8476 | rs4225121   | 5 | 28525894 | G | G    | G | G | G | G |
| 8477 | rs4225120   | 5 | 28525935 | G | G    | G | G | G | G |
| 8478 | rs8259850   | 5 | 28414545 | A | A    | A | A | A | A |
| 8479 | rs3706017   | 5 | 28286942 | A | T    | T | T | T | T |
| 8480 | rs6281932   | 5 | 28855668 | G | A    | A | A | A | A |
| 8481 | rs3700507   | 5 | 29226425 | C | A    | A | A | A | A |
| 8482 | rs3654169   | 5 | 29335055 | G | G    | G | A | A | G |
| 8483 | rs3697620   | 5 | 29406808 | A | A    | A | C | C | A |
| 8484 | rs4225138   | 5 | 29564319 | C | C    | C | C | C | C |
| 8485 | rs6254142   | 5 | 29669430 | G | G    | G | A | A | G |
| 8486 | rs4225141   | 5 | 29978018 | A | A    | A | A | A | A |
| 8487 | rs6325044   | 5 | 30099239 | G | NONE | A | A | A | A |
| 8488 | rs3682333   | 5 | 30357756 | G | G    | G | A | A | G |
| 8489 | rs3718492   | 5 | 30465115 | A | A    | A | G | G | G |
| 8490 | rs3695034   | 5 | 30512882 | A | A    | A | G | G | G |
| 8491 | rs3090139   | 5 | 30537667 | A | A    | A | A | A | G |
| 8492 | rs6234655   | 5 | 30730773 | G | G    | G | A | A | G |
| 8493 | rs3679280   | 5 | 30917512 | G | G    | G | A | A | G |
| 8494 | rs3700706   | 5 | 31071103 | C | C    | C | A | A | C |
| 8495 | rs3705746   | 5 | 31726667 | G | G    | A | A | A | A |
| 8496 | rs6196732   | 5 | 31710308 | C | C    | A | A | A | A |
| 8497 | rs3658401   | 5 | 31765822 | A | A    | C | A | A | C |
| 8498 | rs4225164   | 5 | 32343195 | G | G    | G | G | G | G |
| 8499 | rs3726925   | 5 | 32525291 | A | G    | G | A | G | A |
| 8500 | rs6152183   | 5 | 32534751 | C | A    | A | C | A | C |
| 8501 | rs6237647   | 5 | 33082673 | A | G    | G | A | A | A |
| 8502 | rs3090192   | 5 | 33536864 | A | A    | A | A | A | A |
| 8503 | rs6408534   | 5 | 33877338 | A | A    | A | A | G | G |
| 8504 | rs3673363   | 5 | 33963604 | C | G    | G | C | C | C |
| 8505 | rs6172801   | 5 | 33989584 | C | G    | G | C | C | C |
| 8506 | mCV24314853 | 5 | 38628101 | T | A    | A | A | T | T |
| 8507 | rs6193862   | 5 | 34667066 | A | G    | G | A | G | G |

|      |             |   |          |   |   |   |   |   |   |
|------|-------------|---|----------|---|---|---|---|---|---|
| 8508 | rs4225177   | 5 | 34917291 | T | T | T | T | T | T |
| 8509 | rs4225178   | 5 | 34917333 | G | A | A | G | A | A |
| 8510 | rs3698586   | 5 | 35400359 | G | A | A | G | G | G |
| 8511 | rs3089816   | 5 | 35450379 | G | G | G | G | G | G |
| 8512 | rs6341620   | 5 | 35567326 | A | A | A | G | G | G |
| 8513 | rs6197573   | 5 | 35855759 | G | A | A | G | G | G |
| 8514 | rs3723722   | 5 | 35856605 | A | G | G | A | A | A |
| 8515 | rs3656280   | 5 | 36046250 | A | G | G | A | A | A |
| 8516 | rs3692554   | 5 | 36142398 | A | G | G | A | A | A |
| 8517 | rs3680406   | 5 | 36687347 | A | G | G | A | A | A |
| 8518 | rs3667998   | 5 | 36690479 | A | C | C | A | A | A |
| 8519 | rs6364639   | 5 | 36726060 | G | A | A | G | G | G |
| 8520 | rs4225190   | 5 | 37234479 | A | A | A | A | A | A |
| 8521 | rs3702623   | 5 | 37351343 | C | A | A | C | C | C |
| 8522 | rs3685832   | 5 | 38023009 | C | A | A | A | C | C |
| 8523 | rs6377392   | 5 | 37980576 | A | G | G | A | A | A |
| 8524 | rs3716546   | 5 | 38054339 | G | A | A | G | G | G |
| 8525 | rs3703261   | 5 | 38200794 | G | G | G | A | G | G |
| 8526 | rs6367025   | 5 | 38351511 | G | A | A | A | G | G |
| 8527 | rs3673482   | 5 | 38503436 | A | A | A | G | A | A |
| 8528 | mCV22331571 | 5 | 43271643 | A | A | A | C | A | A |
| 8529 | rs3705677   | 5 | 38986924 | G | G | G | A | G | G |
| 8530 | rs6236042   | 5 | 39054617 | G | A | A | A | A | A |
| 8531 | mCV25308685 | 5 | 43719553 | A | A | A | A | A | A |
| 8532 | rs3682652   | 5 | 40017418 | A | G | G | G | G | G |
| 8533 | rs3656789   | 5 | 40014073 | G | A | A | A | A | A |
| 8534 | rs6294270   | 5 | 39879527 | C | A | A | A | C | C |
| 8535 | rs3089654   | 5 | 39823740 | G | G | G | G | G | G |
| 8536 | rs3662682   | 5 | 40160856 | A | A | A | A | C | C |
| 8537 | rs6345266   | 5 | 40569099 | A | A | A | A | A | A |
| 8538 | rs3716195   | 5 | 40684934 | C | C | C | C | A | A |
| 8539 | rs3088905   | 5 | 40757938 | C | C | C | C | C | C |
| 8540 | rs6361711   | 5 | 41263965 | T | T | T | T | A | A |
| 8541 | rs6255687   | 5 | 42117069 | T | T | T | T | A | A |
| 8542 | rs3660047   | 5 | 42530143 | C | C | C | C | G | G |
| 8543 | rs6215373   | 5 | 42914749 | A | A | A | G | A | A |
| 8544 | rs6401836   | 5 | 42950240 | G | G | G | C | G | G |
| 8545 | rs3669254   | 5 | 43347335 | A | A | A | G | A | A |
| 8546 | rs3689331   | 5 | 43368208 | A | A | A | G | A | A |
| 8547 | rs3656439   | 5 | 43476863 | T | T | T | A | T | T |
| 8548 | rs8272268   | 5 | 44113071 | G | G | G | G | G | G |
| 8549 | rs8272540   | 5 | 44126846 | C | C | C | C | C | C |
| 8550 | rs8272620   | 5 | 44129521 | G | G | G | G | G | G |
| 8551 | rs6265196   | 5 | 44018930 | G | G | G | G | G | G |
| 8552 | mCV24168740 | 5 | 48413252 | G | A | A | G | A | A |
| 8553 | rs3663092   | 5 | 43668813 | C | C | C | A | C | C |
| 8554 | rs3694939   | 5 | 44297911 | G | A | A | G | A | A |
| 8555 | rs6315432   | 5 | 44855350 | G | A | A | G | A | A |
| 8556 | rs6325300   | 5 | 45573305 | T | A | A | T | A | A |
| 8557 | rs3722515   | 5 | 46225155 | G | A | A | G | A | A |
| 8558 | rs6352069   | 5 | 46310157 | A | G | G | A | G | G |
| 8559 | rs4140247   | 5 | 46509743 | A | G | G | A | G | G |
| 8560 | rs3672859   | 5 | 46559630 | A | G | G | A | G | G |
| 8561 | rs6192958   | 5 | 47975043 | A | G | G | A | G | A |
| 8562 | rs6370750   | 5 | 48114559 | G | G | G | G | G | A |
| 8563 | rs6388130   | 5 | 48154288 | A | A | A | A | A | A |
| 8564 | rs4225202   | 5 | 48285534 | A | A | A | A | A | A |
| 8565 | rs3681071   | 5 | 48461082 | A | G | G | A | G | G |
| 8566 | rs3692841   | 5 | 48676800 | A | G | G | A | G | A |
| 8567 | mCV23125912 | 5 | 53853311 | G | A | A | G | A | A |
| 8568 | rs3023045   | 5 | 49189073 | A | C | C | C | C | A |
| 8569 | rs3714001   | 5 | 49310150 | G | C | C | C | C | G |
| 8570 | rs3685952   | 5 | 49643969 | C | G | G | G | G | G |
| 8571 | rs6154859   | 5 | 49665481 | A | G | G | G | G | G |
| 8572 | rs3687137   | 5 | 50119081 | G | A | A | A | A | A |
| 8573 | rs3655238   | 5 | 50443296 | A | G | G | G | G | G |
| 8574 | rs6237983   | 5 | 50559438 | A | G | G | G | G | G |
| 8575 | rs4225204   | 5 | 50999407 | G | A | A | A | A | A |
| 8576 | rs6326139   | 5 | 51003702 | G | A | A | A | A | A |
| 8577 | rs3695532   | 5 | 51017093 | A | A | A | A | A | A |
| 8578 | rs3660964   | 5 | 51028268 | A | G | G | G | G | G |
| 8579 | rs4221979   | 5 | 51496599 | G | G | G | G | G | G |
| 8580 | rs6248036   | 5 | 51438288 | A | A | A | A | C | A |
| 8581 | rs4225221   | 5 | 51736500 | A | A | A | A | A | A |

|      |             |   |          |   |   |   |   |      |   |
|------|-------------|---|----------|---|---|---|---|------|---|
| 8582 | rs3089311   | 5 | 52145097 | A | A | A | A | A    | A |
| 8583 | rs3664008   | 5 | 52283097 | A | G | G | A | G    | G |
| 8584 | rs4225223   | 5 | 52283651 | A | A | A | A | A    | A |
| 8585 | rs6242729   | 5 | 52318577 | G | A | A | G | A    | A |
| 8586 | rs3704283   | 5 | 53039874 | G | A | A | G | A    | A |
| 8587 | rs6237838   | 5 | 53462569 | G | C | C | G | C    | C |
| 8588 | mCV22594101 | 5 | 58523211 | A | A | A | A | G    | A |
| 8589 | rs3706294   | 5 | 53362435 | C | A | A | C | A    | A |
| 8590 | rs3690218   | 5 | 53362108 | A | C | C | A | C    | C |
| 8591 | rs3688942   | 5 | 53361927 | G | G | A | G | A    | A |
| 8592 | rs3696973   | 5 | 53786865 | A | A | A | A | A    | A |
| 8593 | mCV24707394 | 5 | 59198398 | G | C | C | G | C    | C |
| 8594 | rs6209928   | 5 | 54178978 | G | A | A | G | A    | A |
| 8595 | rs4229959   | 5 | 54255046 | A | A | A | A | A    | A |
| 8596 | rs3713492   | 5 | 54302408 | G | A | A | G | A    | A |
| 8597 | mCV23375358 | 5 | 59597927 | T | A | A | T | A    | A |
| 8598 | rs3654245   | 5 | 55002903 | A | C | C | A | C    | C |
| 8599 | rs3654975   | 5 | 55003024 | A | G | G | A | G    | G |
| 8600 | rs6403771   | 5 | 55119859 | G | G | G | G | G    | G |
| 8601 | rs3678683   | 5 | 55489937 | A | T | T | A | T    | T |
| 8602 | rs6200992   | 5 | 55391110 | A | G | G | A | G    | G |
| 8603 | rs6339023   | 5 | 56825527 | A | G | G | A | G    | G |
| 8604 | rs3699784   | 5 | 56922657 | A | C | C | A | C    | C |
| 8605 | rs6154545   | 5 | 57020216 | A | G | G | A | G    | G |
| 8606 | mCV23386455 | 5 | 62818443 | A | G | G | A | G    | G |
| 8607 | rs6210120   | 5 | 57763412 | A | A | A | A | A    | A |
| 8608 | rs3713195   | 5 | 57883360 | C | C | A | C | A    | C |
| 8609 | rs6406122   | 5 | 58657704 | A | G | G | A | G    | G |
| 8610 | rs3090667   | 5 | 58891807 | G | A | A | G | G    | A |
| 8611 | rs3704920   | 5 | 59103073 | C | A | A | C | A    | A |
| 8612 | mCV27558149 | 5 | 64412079 | C | G | G | C | G    | G |
| 8613 | rs6338685   | 5 | 59847783 | A | A | A | A | A    | A |
| 8614 | rs3724321   | 5 | 60369206 | A | C | C | A | C    | C |
| 8615 | rs3679606   | 5 | 61255160 | A | A | G | A | G    | A |
| 8616 | rs3692826   | 5 | 61531469 | G | A | A | G | A    | A |
| 8617 | rs3657916   | 5 | 61800901 | A | A | A | A | G    | A |
| 8618 | rs3707026   | 5 | 62014298 | G | G | G | G | G    | G |
| 8619 | rs3088862   | 5 | 62317643 | A | A | A | A | A    | A |
| 8620 | rs3703900   | 5 | 62465563 | A | C | C | A | C    | C |
| 8621 | rs6281588   | 5 | 62586928 | A | G | G | A | G    | G |
| 8622 | rs3715307   | 5 | 62615736 | A | C | C | A | C    | C |
| 8623 | rs3711950   | 5 | 62648600 | C | A | A | C | A    | A |
| 8624 | rs3090421   | 5 | 62726076 | A | A | A | A | A    | A |
| 8625 | rs4225234   | 5 | 62979175 | A | A | A | A | A    | A |
| 8626 | rs6152354   | 5 | 62985378 | A | G | G | A | G    | G |
| 8627 | rs3718814   | 5 | 63308017 | T | A | A | T | A    | A |
| 8628 | rs6265085   | 5 | 63380661 | A | A | G | A | G    | A |
| 8629 | rs6158897   | 5 | 64230914 | G | G | G | G | G    | G |
| 8630 | rs6339313   | 5 | 64343993 | A | G | G | A | G    | A |
| 8631 | rs3656989   | 5 | 64815360 | G | G | G | A | G    | G |
| 8632 | rs6267669   | 5 | 65103231 | G | G | G | A | G    | G |
| 8633 | rs3711269   | 5 | 65501814 | G | G | G | A | G    | A |
| 8634 | mCV24275411 | 5 | 70936994 | C | C | A | C | A    | C |
| 8635 | mCV24275412 | 5 | 70939275 | G | G | G | G | NONE | G |
| 8636 | mCV24275413 | 5 | 70939277 | G | G | G | G | G    | G |
| 8637 | mCV24275414 | 5 | 70942699 | C | C | A | C | A    | C |
| 8638 | mCV24275415 | 5 | 70954573 | G | G | A | G | A    | G |
| 8639 | mCV24275418 | 5 | 70969823 | C | C | C | C | C    | C |
| 8640 | mCV24275419 | 5 | 70977453 | A | A | G | A | G    | A |
| 8641 | mCV24275424 | 5 | 70983954 | A | A | G | A | G    | A |
| 8642 | mCV24275425 | 5 | 70984290 | G | G | G | G | G    | G |
| 8643 | mCV24275430 | 5 | 71010940 | G | G | G | G | G    | G |
| 8644 | mCV24275431 | 5 | 71011056 | A | A | C | A | C    | A |
| 8645 | mCV24275432 | 5 | 71015127 | G | G | A | G | A    | G |
| 8646 | mCV24275438 | 5 | 71063173 | G | G | A | G | A    | G |
| 8647 | mCV24275706 | 5 | 71063271 | A | A | G | A | G    | A |
| 8648 | mCV24275707 | 5 | 71063475 | A | A | G | A | G    | A |
| 8649 | mCV24275708 | 5 | 71063647 | A | A | C | A | C    | A |
| 8650 | mCV24275718 | 5 | 71063688 | A | A | T | A | T    | A |
| 8651 | mCV24275719 | 5 | 71066245 | C | C | C | C | C    | C |
| 8652 | mCV24275720 | 5 | 71076132 | G | G | G | G | G    | G |
| 8653 | mCV24275730 | 5 | 71076134 | C | C | C | C | C    | C |
| 8654 | mCV24275742 | 5 | 66697965 | G | G | A | G | A    | G |
| 8655 | rs4225260   | 5 | 65894761 | C | C | C | C | C    | C |

|      |             |   |          |   |   |   |   |   |   |
|------|-------------|---|----------|---|---|---|---|---|---|
| 8656 | mCV24275743 | 5 | 71081942 | A | A | C | A | C | A |
| 8657 | mCV24275744 | 5 | 71081979 | G | G | A | G | A | G |
| 8658 | mCV24275755 | 5 | 71082277 | C | C | A | C | A | C |
| 8659 | mCV24275767 | 5 | 71083067 | A | A | G | A | G | A |
| 8660 | mCV24275768 | 5 | 71083841 | C | C | A | C | A | C |
| 8661 | mCV24275778 | 5 | 71085211 | A | A | C | A | C | A |
| 8662 | mCV24275779 | 5 | 71086650 | G | G | A | G | A | G |
| 8663 | mCV24275780 | 5 | 71086733 | T | T | A | T | A | T |
| 8664 | mCV24276050 | 5 | 71086745 | A | A | T | A | T | A |
| 8665 | mCV24276051 | 5 | 71088221 | A | A | G | A | G | A |
| 8666 | mCV24276062 | 5 | 71089699 | G | G | A | G | A | G |
| 8667 | mCV24276063 | 5 | 71090703 | G | G | G | G | G | G |
| 8668 | mCV24276064 | 5 | 71091474 | A | A | C | A | C | A |
| 8669 | mCV24276098 | 5 | 71099218 | T | T | A | T | A | T |
| 8670 | mCV24276099 | 5 | 71099511 | C | C | A | C | A | C |
| 8671 | mCV24276111 | 5 | 71099839 | A | A | G | A | G | A |
| 8672 | mCV24276112 | 5 | 71100148 | C | C | A | C | A | C |
| 8673 | mCV24276122 | 5 | 71100307 | A | A | G | A | G | A |
| 8674 | mCV24276123 | 5 | 71100410 | A | A | G | A | G | A |
| 8675 | mCV24276124 | 5 | 71100526 | A | A | C | A | C | A |
| 8676 | mCV24276133 | 5 | 71100556 | G | G | A | G | A | G |
| 8677 | mCV24276134 | 5 | 66718444 | C | C | A | C | A | C |
| 8678 | mCV24276135 | 5 | 71102920 | A | A | T | A | T | A |
| 8679 | mCV24276418 | 5 | 71103133 | G | G | A | G | A | G |
| 8680 | mCV24276419 | 5 | 71103385 | C | C | A | C | A | C |
| 8681 | mCV24276439 | 5 | 71103433 | G | G | A | G | A | G |
| 8682 | mCV24276440 | 5 | 71103709 | A | A | G | A | G | A |
| 8683 | mCV24276450 | 5 | 71104334 | G | G | A | G | A | G |
| 8684 | mCV24276462 | 5 | 71105453 | A | A | G | A | G | A |
| 8685 | mCV24276464 | 5 | 71105556 | A | A | G | A | G | A |
| 8686 | mCV24276479 | 5 | 71105845 | A | A | G | A | G | A |
| 8687 | mCV24276480 | 5 | 71105878 | G | G | A | G | A | G |
| 8688 | mCV24276481 | 5 | 71106944 | C | C | G | C | G | C |
| 8689 | mCV24276748 | 5 | 71107580 | G | G | A | G | A | G |
| 8690 | mCV24276749 | 5 | 71110108 | A | A | G | A | G | A |
| 8691 | mCV24276756 | 5 | 71110222 | A | A | G | A | G | A |
| 8692 | mCV24276757 | 5 | 71110565 | C | C | A | C | A | C |
| 8693 | mCV24276763 | 5 | 71112258 | A | A | G | A | G | A |
| 8694 | mCV24276764 | 5 | 71112285 | G | G | A | G | A | G |
| 8695 | mCV24276768 | 5 | 71112434 | G | G | A | G | A | G |
| 8696 | mCV24276769 | 5 | 71112574 | G | G | A | G | A | G |
| 8697 | mCV24276770 | 5 | 71112672 | A | A | T | A | T | A |
| 8698 | mCV24276775 | 5 | 71113182 | A | A | G | A | G | A |
| 8699 | mCV24276776 | 5 | 71113346 | G | G | A | G | A | G |
| 8700 | mCV24276780 | 5 | 71113472 | A | A | G | A | G | A |
| 8701 | mCV24276781 | 5 | 71113531 | G | G | A | G | A | G |
| 8702 | mCV24276782 | 5 | 71114341 | G | G | A | G | A | G |
| 8703 | mCV24276789 | 5 | 71114359 | A | A | G | A | G | A |
| 8704 | mCV24276790 | 5 | 71115218 | A | A | G | A | G | A |
| 8705 | mCV24276791 | 5 | 71117849 | A | A | G | A | G | A |
| 8706 | mCV24276798 | 5 | 71123568 | T | T | A | T | A | T |
| 8707 | mCV24276799 | 5 | 71123842 | A | A | G | A | G | A |
| 8708 | mCV24276800 | 5 | 71125182 | G | G | A | G | A | G |
| 8709 | mCV24276810 | 5 | 71125190 | G | G | A | G | A | G |
| 8710 | mCV24276811 | 5 | 66745356 | C | C | A | C | A | C |
| 8711 | mCV24276812 | 5 | 71125956 | G | G | A | G | A | G |
| 8712 | mCV24276821 | 5 | 71126094 | G | G | A | G | A | G |
| 8713 | mCV24276822 | 5 | 71129034 | A | A | G | A | G | A |
| 8714 | mCV22918434 | 5 | 71130372 | G | G | A | G | A | G |
| 8715 | mCV22918435 | 5 | 71130569 | A | A | C | A | C | A |
| 8716 | mCV22918441 | 5 | 71130668 | A | A | G | A | G | A |
| 8717 | mCV22918442 | 5 | 71130694 | G | G | A | G | A | G |
| 8718 | mCV22918443 | 5 | 71130827 | A | A | G | A | G | A |
| 8719 | mCV22918450 | 5 | 71130887 | A | A | G | A | G | A |
| 8720 | mCV22918451 | 5 | 71131375 | G | G | C | G | C | G |
| 8721 | mCV22918452 | 5 | 71131386 | G | G | A | G | A | G |
| 8722 | mCV22918459 | 5 | 71131405 | A | A | A | A | G | A |
| 8723 | mCV22918460 | 5 | 71136568 | C | C | A | C | A | C |
| 8724 | mCV22918468 | 5 | 71136740 | G | G | A | G | A | G |
| 8725 | mCV22918469 | 5 | 71136913 | G | G | A | G | A | G |
| 8726 | mCV22918470 | 5 | 71137145 | A | A | G | A | G | A |
| 8727 | mCV22918651 | 5 | 71137168 | C | C | A | C | G | C |
| 8728 | mCV22918652 | 5 | 71137236 | A | A | C | A | C | A |
| 8729 | mCV22918660 | 5 | 71137572 | A | A | G | A | G | A |

|      |             |   |          |      |   |   |   |   |   |
|------|-------------|---|----------|------|---|---|---|---|---|
| 8730 | mCV22918661 | 5 | 71137754 | A    | A | G | A | G | A |
| 8731 | mCV22918671 | 5 | 71138548 | G    | G | A | G | A | G |
| 8732 | rs3684754   | 5 | 65964490 | G    | G | A | A | G | G |
| 8733 | mCV22996091 | 5 | 66852497 | C    | C | G | C | A | C |
| 8734 | rs6170457   | 5 | 66180535 | G    | G | G | G | G | G |
| 8735 | rs3659098   | 5 | 66181856 | G    | G | G | A | G | G |
| 8736 | rs3662462   | 5 | 66209208 | A    | A | A | G | A | A |
| 8737 | rs6227779   | 5 | 66701098 | G    | G | G | G | G | G |
| 8738 | rs3691938   | 5 | 66879354 | G    | G | G | G | G | G |
| 8739 | rs6411304   | 5 | 67249846 | A    | A | A | A | A | A |
| 8740 | rs3088773   | 5 | 67602502 | C    | C | C | C | C | C |
| 8741 | rs3090910   | 5 | 68012404 | A    | A | A | A | A | A |
| 8742 | rs6242879   | 5 | 68506442 | C    | A | A | A | A | A |
| 8743 | rs6168670   | 5 | 68660765 | G    | A | A | A | A | A |
| 8744 | rs3675400   | 5 | 68661347 | G    | A | A | A | A | A |
| 8745 | rs3681370   | 5 | 68768688 | A    | G | G | G | G | G |
| 8746 | rs6158490   | 5 | 68943118 | C    | C | C | C | C | C |
| 8747 | rs3695107   | 5 | 69049778 | A    | G | G | G | G | G |
| 8748 | rs3722869   | 5 | 68998655 | A    | G | A | G | G | G |
| 8749 | rs3088650   | 5 | 69511947 | A    | A | A | A | A | A |
| 8750 | mCV24307017 | 5 | 74853431 | A    | A | G | A | G | A |
| 8751 | rs3678516   | 5 | 69652238 | A    | A | A | A | A | A |
| 8752 | rs6397126   | 5 | 70143718 | A    | A | A | A | A | A |
| 8753 | rs3090696   | 5 | 70605484 | A    | A | A | A | A | A |
| 8754 | rs6308779   | 5 | 70267762 | G    | G | A | G | G | G |
| 8755 | rs3710735   | 5 | 71369230 | C    | C | G | C | G | C |
| 8756 | rs6259856   | 5 | 71398209 | A    | A | G | A | G | A |
| 8757 | rs6409508   | 5 | 71768054 | G    | G | G | A | G | G |
| 8758 | mCV23012415 | 5 | 77071630 | A    | C | A | C | A | A |
| 8759 | rs3669361   | 5 | 71592665 | A    | A | A | A | G | A |
| 8760 | rs3689647   | 5 | 72316977 | A    | A | G | G | G | A |
| 8761 | rs4138743   | 5 | 73109674 | G    | G | A | G | A | G |
| 8762 | rs3670420   | 5 | 73116196 | T    | T | A | T | A | T |
| 8763 | rs3090429   | 5 | 71835734 | G    | G | G | G | G | G |
| 8764 | rs3708666   | 5 | 71983570 | G    | A | G | G | G | A |
| 8765 | mCV22834148 | 5 | 77731523 | G    | A | G | A | G | G |
| 8766 | rs4225267   | 5 | 71950258 | A    | A | C | C | C | A |
| 8767 | rs6161105   | 5 | 73093296 | G    | A | G | A | G | A |
| 8768 | rs6354067   | 5 | 73116738 | A    | G | A | G | A | G |
| 8769 | rs3672514   | 5 | 73156460 | G    | A | G | A | G | A |
| 8770 | rs3700540   | 5 | 73177555 | A    | C | A | C | A | C |
| 8771 | rs3657238   | 5 | 73302032 | NONE | G | A | A | A | G |
| 8772 | rs3684542   | 5 | 74138933 | A    | G | G | G | G | G |
| 8773 | rs3707537   | 5 | 74177041 | C    | A | A | A | A | A |
| 8774 | rs3722245   | 5 | 74543251 | A    | A | G | A | G | A |
| 8775 | rs3665183   | 5 | 74332420 | A    | C | C | C | C | C |
| 8776 | rs6221589   | 5 | 74399064 | G    | G | A | A | A | G |
| 8777 | rs4225284   | 5 | 74655004 | G    | G | G | G | G | G |
| 8778 | rs4225286   | 5 | 74655122 | C    | C | C | C | C | C |
| 8779 | rs4225287   | 5 | 74655225 | C    | C | C | C | C | C |
| 8780 | mCV22996021 | 5 | 75065363 | T    | A | A | T | A | A |
| 8781 | rs6257272   | 5 | 75618342 | A    | G | G | A | G | G |
| 8782 | rs4225300   | 5 | 75645166 | A    | G | G | A | G | G |
| 8783 | rs3090786   | 5 | 75677192 | A    | A | A | A | A | A |
| 8784 | rs3720626   | 5 | 75760098 | G    | A | A | G | A | A |
| 8785 | rs4225316   | 5 | 76018660 | T    | T | T | T | T | T |
| 8786 | rs4225315   | 5 | 76018697 | A    | A | A | A | A | A |
| 8787 | rs6407418   | 5 | 76207606 | G    | G | A | A | A | A |
| 8788 | rs6309185   | 5 | 76387346 | G    | G | G | G | G | G |
| 8789 | rs6252217   | 5 | 76773822 | A    | A | A | A | A | A |
| 8790 | rs3662055   | 5 | 77161759 | A    | A | T | A | T | T |
| 8791 | rs3713970   | 5 | 77194549 | A    | A | C | A | C | C |
| 8792 | rs3678094   | 5 | 77385778 | A    | C | C | C | C | C |
| 8793 | rs4138803   | 5 | 77522470 | A    | A | T | A | T | T |
| 8794 | rs3090419   | 5 | 77538720 | A    | A | A | A | A | A |
| 8795 | rs3704367   | 5 | 77550939 | A    | A | G | A | G | G |
| 8796 | mCV23424074 | 5 | 84156336 | A    | C | C | C | C | C |
| 8797 | rs3658895   | 5 | 78003333 | A    | G | A | G | A | A |
| 8798 | rs3714275   | 5 | 78425503 | A    | C | C | C | C | C |
| 8799 | rs6300728   | 5 | 78452816 | T    | A | T | A | T | T |
| 8800 | rs3658150   | 5 | 78563019 | A    | A | G | A | G | G |
| 8801 | rs2020550   | 5 | 78578727 | C    | C | A | C | A | A |
| 8802 | rs3722733   | 5 | 78641871 | A    | A | G | A | G | G |
| 8803 | mCV23427890 | 5 | 85495374 | C    | G | G | G | G | G |

|      |             |   |           |   |   |   |   |   |   |
|------|-------------|---|-----------|---|---|---|---|---|---|
| 8804 | rs6319876   | 5 | 79250625  | A | G | G | G | G | G |
| 8805 | rs3708749   | 5 | 79591322  | G | A | A | A | A | A |
| 8806 | rs3658818   | 5 | 80314941  | G | A | A | A | A | A |
| 8807 | rs6409842   | 5 | 80552594  | G | A | A | A | A | A |
| 8808 | rs6388786   | 5 | 81124536  | G | G | G | G | G | G |
| 8809 | rs3721607   | 5 | 81282125  | G | A | G | A | G | G |
| 8810 | rs3685079   | 5 | 81316994  | A | C | A | C | A | C |
| 8811 | mCV22572591 | 5 | 102014263 | G | A | A | G | A | A |
| 8812 | rs3667334   | 5 | 81819770  | C | A | C | A | C | A |
| 8813 | rs3662368   | 5 | 81766675  | A | G | A | G | A | A |
| 8814 | rs6264120   | 5 | 81778708  | A | G | A | G | A | A |
| 8815 | rs3725100   | 5 | 81877043  | G | A | G | A | G | G |
| 8816 | rs6400622   | 5 | 82823777  | A | T | A | T | A | T |
| 8817 | rs6154126   | 5 | 82824119  | A | G | A | G | A | G |
| 8818 | rs3659819   | 5 | 82846170  | G | A | G | A | G | A |
| 8819 | rs3678577   | 5 | 83411956  | G | A | G | A | G | A |
| 8820 | rs3699967   | 5 | 83697096  | C | A | A | A | A | A |
| 8821 | rs3719592   | 5 | 84647838  | A | G | A | G | A | G |
| 8822 | rs3670431   | 5 | 84772632  | T | A | T | A | T | A |
| 8823 | rs3090163   | 5 | 84772845  | T | T | T | T | T | T |
| 8824 | rs6301814   | 5 | 84821564  | T | A | T | A | T | A |
| 8825 | rs3090530   | 5 | 84974690  | A | A | A | A | A | A |
| 8826 | rs6318943   | 5 | 85121741  | A | A | G | A | G | A |
| 8827 | rs3688741   | 5 | 85151024  | A | A | A | A | G | A |
| 8828 | rs3657487   | 5 | 86378495  | G | A | A | A | A | A |
| 8829 | rs8265626   | 5 | 86360584  | A | A | A | A | A | A |
| 8830 | rs8274304   | 5 | 86351947  | A | A | A | A | A | A |
| 8831 | rs8274297   | 5 | 86348742  | A | A | A | A | A | A |
| 8832 | rs8259908   | 5 | 86488011  | A | A | A | A | A | A |
| 8833 | rs3089910   | 5 | 86612686  | A | A | A | A | A | A |
| 8834 | rs6304491   | 5 | 86912970  | C | C | C | C | C | C |
| 8835 | rs3687494   | 5 | 86893433  | T | A | T | A | T | A |
| 8836 | rs3669458   | 5 | 77109755  | C | A | C | A | C | C |
| 8837 | rs6343240   | 5 | 87587201  | A | A | A | A | A | A |
| 8838 | rs3656354   | 5 | 87803418  | A | A | T | A | T | A |
| 8839 | rs3701843   | 5 | 87955097  | G | A | G | A | G | A |
| 8840 | rs3685452   | 5 | 87980373  | G | A | G | A | G | A |
| 8841 | rs3724733   | 5 | 88022166  | C | A | C | A | C | A |
| 8842 | rs3089014   | 5 | 88236895  | A | A | A | A | A | A |
| 8843 | rs6404893   | 5 | 88405441  | A | A | A | A | A | A |
| 8844 | rs3673049   | 5 | 88498569  | C | G | C | G | C | C |
| 8845 | mCV23876305 | 5 | 93159592  | G | A | A | A | A | A |
| 8846 | mCV25016380 | 5 | 93385973  | A | G | G | G | G | G |
| 8847 | rs4225366   | 5 | 89038627  | G | G | G | G | G | G |
| 8848 | rs4225367   | 5 | 89038485  | A | A | A | A | A | A |
| 8849 | rs4225368   | 5 | 89306578  | A | A | A | A | G | G |
| 8850 | rs3689962   | 5 | 89358945  | C | G | G | G | G | G |
| 8851 | rs3716445   | 5 | 89461092  | A | T | A | T | A | A |
| 8852 | rs3678132   | 5 | 89876185  | G | G | A | G | A | A |
| 8853 | rs3723202   | 5 | 89956609  | G | A | G | A | G | G |
| 8854 | rs6306077   | 5 | 90114627  | G | G | G | G | G | G |
| 8855 | rs3090680   | 5 | 90305723  | C | C | C | C | C | C |
| 8856 | rs6227466   | 5 | 91117068  | G | A | G | A | G | G |
| 8857 | rs3723011   | 5 | 91459891  | A | G | G | G | G | G |
| 8858 | rs3680521   | 5 | 91663683  | C | C | A | C | A | A |
| 8859 | rs6350541   | 5 | 92110414  | G | G | G | G | G | G |
| 8860 | mCV24608431 | 5 | 92470267  | C | A | C | A | C | C |
| 8861 | rs4225377   | 5 | 91790272  | G | G | G | G | G | G |
| 8862 | rs6163295   | 5 | 91982403  | A | A | A | A | A | A |
| 8863 | rs3695616   | 5 | 93341555  | G | A | A | A | A | A |
| 8864 | rs6348455   | 5 | 93526584  | A | A | A | A | A | A |
| 8865 | rs3090670   | 5 | 93866531  | G | G | A | G | G | G |
| 8866 | rs6249855   | 5 | 94164595  | G | G | G | A | G | G |
| 8867 | rs6216254   | 5 | 94228665  | C | C | C | C | C | C |
| 8868 | rs3697719   | 5 | 94363359  | G | G | G | A | G | G |
| 8869 | rs4225379   | 5 | 94386352  | T | T | T | T | T | T |
| 8870 | rs4225381   | 5 | 94699228  | G | G | G | G | G | G |
| 8871 | rs4225380   | 5 | 94699448  | G | G | G | A | G | G |
| 8872 | rs3707832   | 5 | 94773717  | G | G | G | A | G | G |
| 8873 | rs3706737   | 5 | 94827314  | T | T | T | A | T | T |
| 8874 | rs3699266   | 5 | 94857761  | A | C | A | C | A | A |
| 8875 | rs6344187   | 5 | 95124209  | A | A | A | A | A | A |
| 8876 | rs3712722   | 5 | 95127691  | G | G | G | A | G | G |
| 8877 | rs3661241   | 5 | 95154383  | A | T | A | T | A | A |



|      |             |   |           |   |   |   |   |   |   |
|------|-------------|---|-----------|---|---|---|---|---|---|
| 8878 | rs3696322   | 5 | 95831320  | A | A | A | T | A | A |
| 8879 | rs3705458   | 5 | 96618852  | C | C | C | G | C | C |
| 8880 | rs3683611   | 5 | 97536219  | G | A | A | G | A | A |
| 8881 | rs3726313   | 5 | 97883499  | A | A | A | C | A | A |
| 8882 | mCV24425645 | 5 | 102803377 | A | G | G | A | G | G |
| 8883 | rs6188215   | 5 | 97779115  | G | G | G | G | G | G |
| 8884 | rs3088620   | 5 | 97788599  | G | G | G | G | G | G |
| 8885 | rs4221981   | 5 | 98143573  | G | G | G | G | G | G |
| 8886 | rs3090420   | 5 | 98397874  | A | A | A | A | A | A |
| 8887 | rs3721248   | 5 | 98703608  | G | G | G | A | G | G |
| 8888 | rs6384391   | 5 | 98914657  | G | G | G | G | G | G |
| 8889 | rs3714102   | 5 | 99238408  | A | C | C | C | C | C |
| 8890 | rs6327271   | 5 | 99696517  | A | A | A | A | A | A |
| 8891 | rs3720559   | 5 | 100374400 | C | G | C | G | C | G |
| 8892 | mCV24416913 | 5 | 105506767 | G | A | G | G | A | G |
| 8893 | rs4225383   | 5 | 100960120 | A | A | A | A | A | A |
| 8894 | rs3694887   | 5 | 101097424 | G | A | G | A | G | G |
| 8895 | rs6191112   | 5 | 101315864 | A | A | C | A | A | C |
| 8896 | rs3689574   | 5 | 101327935 | G | G | A | G | G | A |
| 8897 | rs6412966   | 5 | 101621477 | A | A | A | A | A | A |
| 8898 | rs3090525   | 5 | 103450903 | A | A | A | A | G | A |
| 8899 | mCV24413438 | 5 | 106826186 | A | A | G | G | A | G |
| 8900 | rs8256226   | 5 | 101806000 | A | A | A | A | A | A |
| 8901 | rs8256230   | 5 | 101807634 | A | A | A | A | A | G |
| 8902 | rs8256232   | 5 | 101808182 | G | G | G | G | G | A |
| 8903 | rs3663200   | 5 | 101872969 | G | A | A | G | A | A |
| 8904 | rs6218435   | 5 | 102359523 | G | A | A | G | A | A |
| 8905 | rs3722596   | 5 | 102581717 | C | C | A | C | C | A |
| 8906 | rs6191447   | 5 | 102883647 | C | C | A | C | C | A |
| 8907 | rs4225386   | 5 | 103004322 | T | T | A | T | T | A |
| 8908 | rs3654076   | 5 | 103489732 | G | G | A | A | A | A |
| 8909 | rs6350578   | 5 | 103696203 | C | C | A | A | A | A |
| 8910 | rs3680366   | 5 | 104206906 | G | A | A | A | G | A |
| 8911 | rs3677428   | 5 | 104353483 | A | G | G | A | G | G |
| 8912 | rs6236826   | 5 | 104562823 | T | T | T | T | T | T |
| 8913 | rs6202283   | 5 | 104987392 | G | G | G | G | G | G |
| 8914 | rs4225395   | 5 | 105083944 | G | G | G | G | G | G |
| 8915 | rs4225398   | 5 | 105084101 | A | A | A | A | G | A |
| 8916 | rs3663502   | 5 | 105124196 | C | A | C | A | C | C |
| 8917 | rs3669104   | 5 | 105418682 | A | G | A | G | A | A |
| 8918 | rs3726547   | 5 | 105832285 | G | A | A | A | A | G |
| 8919 | rs3682429   | 5 | 106078273 | G | G | A | G | G | A |
| 8920 | rs3665124   | 5 | 107073938 | A | A | A | G | G | A |
| 8921 | rs3725274   | 5 | 107384723 | G | G | G | A | G | G |
| 8922 | rs4225404   | 5 | 107987221 | A | A | A | A | A | A |
| 8923 | rs4225405   | 5 | 107987130 | A | A | A | A | A | A |
| 8924 | rs3708939   | 5 | 107911845 | G | A | A | A | A | A |
| 8925 | rs3677162   | 5 | 107943458 | A | A | A | C | A | A |
| 8926 | rs6314134   | 5 | 108241775 | C | C | C | C | C | C |
| 8927 | rs3710018   | 5 | 108309646 | G | G | A | A | G | G |
| 8928 | rs3725746   | 5 | 108437594 | A | G | G | A | G | G |
| 8929 | rs3653831   | 5 | 108437901 | A | G | G | A | G | G |
| 8930 | mCV23798232 | 5 | 114103101 | A | A | A | A | C | A |
| 8931 | rs3663213   | 5 | 109378856 | G | G | A | G | G | A |
| 8932 | rs6272142   | 5 | 109393681 | A | A | A | A | A | A |
| 8933 | rs6299102   | 5 | 109512907 | G | G | G | G | G | G |
| 8934 | rs3655095   | 5 | 109677144 | A | G | G | G | G | G |
| 8935 | rs4225423   | 5 | 109771038 | G | G | G | G | G | G |
| 8936 | rs4225425   | 5 | 109771341 | A | A | A | A | A | A |
| 8937 | rs3688590   | 5 | 110056163 | A | G | A | G | G | A |
| 8938 | mCV22554962 | 5 | 115013560 | G | G | A | A | G | A |
| 8939 | rs3658755   | 5 | 110117726 | G | G | A | G | G | G |
| 8940 | rs3698363   | 5 | 110305748 | A | A | A | G | A | A |
| 8941 | rs3657810   | 5 | 110760303 | G | G | G | A | G | G |
| 8942 | rs3672354   | 5 | 111189170 | G | G | A | G | G | G |
| 8943 | rs4225426   | 5 | 111134034 | A | A | A | A | A | A |
| 8944 | rs6176561   | 5 | 111373825 | G | G | G | G | G | G |
| 8945 | rs3719351   | 5 | 111382152 | G | A | G | A | A | G |
| 8946 | rs6160086   | 5 | 111402241 | A | A | A | A | A | A |
| 8947 | rs4225432   | 5 | 111872548 | C | C | C | C | C | C |
| 8948 | mCV23397413 | 5 | 116774498 | A | A | G | G | A | G |
| 8949 | mCV25130934 | 5 | 117090128 | C | C | C | A | C | A |
| 8950 | rs6343470   | 5 | 112128132 | A | A | A | A | A | A |
| 8951 | rs4225446   | 5 | 112360279 | A | A | A | A | A | A |

|      |             |   |           |   |   |   |   |   |   |
|------|-------------|---|-----------|---|---|---|---|---|---|
| 8952 | rs4225448   | 5 | 112360414 | A | A | A | A | A | A |
| 8953 | rs3090568   | 5 | 112360539 | C | C | C | C | C | C |
| 8954 | rs3719767   | 5 | 112561293 | G | G | G | A | G | G |
| 8955 | rs3716512   | 5 | 112857770 | A | A | G | G | A | G |
| 8956 | rs6238193   | 5 | 113059073 | A | A | A | A | A | A |
| 8957 | mCV22739565 | 5 | 118393576 | G | G | G | C | C | G |
| 8958 | rs3709746   | 5 | 113367366 | T | T | A | A | T | A |
| 8959 | rs6223587   | 5 | 113701651 | A | A | A | A | A | A |
| 8960 | rs3663141   | 5 | 114196024 | G | G | A | A | G | A |
| 8961 | mCV24888028 | 5 | 119264682 | A | A | G | G | G | G |
| 8962 | rs4225451   | 5 | 114538600 | C | C | C | C | C | C |
| 8963 | rs4225452   | 5 | 114538695 | A | A | A | A | A | A |
| 8964 | rs3023051   | 5 | 114664343 | G | G | A | A | G | A |
| 8965 | rs6158283   | 5 | 114686528 | A | A | A | A | A | A |
| 8966 | rs3680360   | 5 | 114730338 | A | A | C | C | A | C |
| 8967 | rs3662161   | 5 | 114905705 | G | G | G | A | G | G |
| 8968 | rs3693466   | 5 | 114936743 | G | G | A | A | A | A |
| 8969 | rs4225453   | 5 | 115458279 | G | G | G | G | G | G |
| 8970 | rs3662655   | 5 | 115709104 | A | A | A | G | A | G |
| 8971 | rs6284287   | 5 | 115662246 | A | A | A | A | A | A |
| 8972 | rs3656108   | 5 | 115650410 | A | A | A | G | A | G |
| 8973 | rs3655469   | 5 | 115898881 | G | G | A | G | G | G |
| 8974 | rs6332004   | 5 | 116351231 | A | A | C | A | A | C |
| 8975 | rs3723083   | 5 | 116664942 | A | A | C | A | A | A |
| 8976 | rs3707486   | 5 | 116664769 | A | A | C | A | A | A |
| 8977 | rs3653889   | 5 | 116976007 | G | G | G | A | G | A |
| 8978 | mCV23328629 | 5 | 122551746 | G | G | G | A | G | A |
| 8979 | mCV23328630 | 5 | 122551908 | C | C | C | C | C | C |
| 8980 | mCV23328631 | 5 | 122552078 | A | A | G | G | G | G |
| 8981 | mCV23328638 | 5 | 122552371 | G | G | G | A | G | A |
| 8982 | mCV23328639 | 5 | 122552491 | A | A | C | C | C | C |
| 8983 | mCV23328640 | 5 | 122552657 | A | A | G | A | G | A |
| 8984 | mCV23328908 | 5 | 122552680 | A | A | A | G | A | G |
| 8985 | mCV23328909 | 5 | 122553583 | C | C | G | G | G | G |
| 8986 | mCV23328910 | 5 | 122554026 | A | A | A | G | A | G |
| 8987 | mCV23328919 | 5 | 122555734 | A | A | A | G | A | G |
| 8988 | mCV23328938 | 5 | 122555834 | G | G | G | A | G | A |
| 8989 | mCV25274159 | 5 | 122557840 | A | A | A | G | A | G |
| 8990 | mCV25274160 | 5 | 122560450 | A | A | A | G | A | G |
| 8991 | mCV25274170 | 5 | 122560987 | G | G | G | A | G | A |
| 8992 | mCV25274178 | 5 | 122561571 | G | G | G | A | G | A |
| 8993 | mCV25274180 | 5 | 122563098 | T | T | A | A | A | A |
| 8994 | mCV25274187 | 5 | 122563140 | A | A | G | G | G | G |
| 8995 | mCV25274189 | 5 | 122563327 | A | A | G | G | G | G |
| 8996 | mCV25274196 | 5 | 122563970 | C | C | C | A | C | A |
| 8997 | mCV25274197 | 5 | 122565292 | A | A | G | G | G | G |
| 8998 | mCV25274198 | 5 | 122565842 | G | G | G | A | G | A |
| 8999 | mCV25274205 | 5 | 122567226 | A | A | A | G | A | G |
| 9000 | mCV25274214 | 5 | 122568290 | G | G | A | G | A | G |
| 9001 | mCV25274215 | 5 | 122568643 | A | A | A | G | A | G |
| 9002 | mCV25274222 | 5 | 122569080 | A | A | A | A | A | A |
| 9003 | mCV25274223 | 5 | 122570675 | A | A | C | C | C | C |
| 9004 | mCV25274224 | 5 | 122571985 | T | T | A | T | A | T |
| 9005 | mCV25274491 | 5 | 122573732 | G | G | A | A | A | A |
| 9006 | mCV25274492 | 5 | 122574377 | A | A | A | G | A | G |
| 9007 | mCV25274493 | 5 | 122574800 | G | G | A | A | G | A |
| 9008 | mCV25274500 | 5 | 122575011 | A | A | G | G | G | G |
| 9009 | rs4225464   | 5 | 117686202 | G | G | G | G | G | G |
| 9010 | mCV25274501 | 5 | 122575517 | G | G | A | G | A | G |
| 9011 | mCV25274502 | 5 | 122578689 | G | G | G | A | G | A |
| 9012 | mCV25274509 | 5 | 122579755 | A | A | A | T | A | T |
| 9013 | rs6167888   | 5 | 117681273 | G | G | G | G | G | G |
| 9014 | mCV25274510 | 5 | 122580476 | A | A | G | G | G | G |
| 9015 | mCV25274511 | 5 | 122581079 | A | A | A | G | A | G |
| 9016 | mCV25274530 | 5 | 122581084 | A | A | G | G | G | G |
| 9017 | mCV22863581 | 5 | 122581878 | A | A | T | T | T | T |
| 9018 | mCV22863582 | 5 | 122582498 | A | A | A | G | A | G |
| 9019 | mCV22863583 | 5 | 122582518 | C | C | C | A | C | A |
| 9020 | mCV22863587 | 5 | 122582971 | G | G | G | A | G | A |
| 9021 | mCV22863588 | 5 | 122583748 | A | A | G | G | G | G |
| 9022 | mCV22863593 | 5 | 122585221 | A | A | A | G | A | G |
| 9023 | mCV22863594 | 5 | 122585452 | A | A | A | G | A | G |
| 9024 | mCV22863602 | 5 | 122585720 | G | G | A | G | A | G |
| 9025 | mCV22863604 | 5 | 122587549 | G | G | G | A | G | A |

|      |             |   |           |   |      |   |   |   |   |
|------|-------------|---|-----------|---|------|---|---|---|---|
| 9026 | mCV22863614 | 5 | 122587587 | G | G    | G | C | G | C |
| 9027 | mCV22863615 | 5 | 122587687 | G | G    | G | A | G | A |
| 9028 | mCV22863616 | 5 | 122588050 | G | G    | G | A | G | A |
| 9029 | mCV22863626 | 5 | 122588565 | G | G    | G | A | G | A |
| 9030 | mCV22863627 | 5 | 122588596 | G | G    | G | A | G | A |
| 9031 | mCV22863646 | 5 | 122588640 | C | C    | C | G | C | G |
| 9032 | mCV22863647 | 5 | 122589816 | T | T    | A | T | A | T |
| 9033 | mCV22863833 | 5 | 122590750 | A | A    | C | C | C | C |
| 9034 | mCV22863834 | 5 | 122591332 | G | G    | G | A | G | A |
| 9035 | mCV24594284 | 5 | 122594513 | A | A    | A | T | A | T |
| 9036 | mCV24594283 | 5 | 122595458 | A | A    | A | C | A | C |
| 9037 | mCV24594282 | 5 | 122595614 | G | G    | G | A | G | A |
| 9038 | mCV24594275 | 5 | 122595690 | G | G    | C | A | G | A |
| 9039 | mCV24594274 | 5 | 122596103 | A | A    | C | C | C | C |
| 9040 | mCV24594009 | 5 | 122596628 | G | G    | G | A | G | A |
| 9041 | mCV24593993 | 5 | 122599193 | A | A    | G | G | G | G |
| 9042 | mCV24593992 | 5 | 122600338 | G | G    | G | G | G | G |
| 9043 | mCV24593982 | 5 | 122600507 | A | A    | A | G | A | G |
| 9044 | mCV24593980 | 5 | 122603912 | G | G    | G | A | G | A |
| 9045 | mCV24593969 | 5 | 122606202 | G | G    | A | A | A | A |
| 9046 | mCV24593968 | 5 | 122607193 | G | G    | G | A | G | A |
| 9047 | mCV24593958 | 5 | 122607515 | G | G    | A | A | A | A |
| 9048 | mCV24593957 | 5 | 122607543 | A | A    | G | G | G | G |
| 9049 | mCV24593956 | 5 | 122607565 | G | G    | A | A | A | A |
| 9050 | mCV24593945 | 5 | 122610201 | G | G    | A | G | A | G |
| 9051 | mCV24593933 | 5 | 122611250 | G | G    | G | A | G | A |
| 9052 | mCV24593662 | 5 | 122615306 | A | A    | G | A | G | A |
| 9053 | mCV24593660 | 5 | 122617432 | G | G    | G | A | G | A |
| 9054 | mCV24593649 | 5 | 122617625 | G | G    | G | A | G | A |
| 9055 | mCV24593637 | 5 | 122620224 | A | A    | G | G | G | G |
| 9056 | mCV24593636 | 5 | 122620554 | G | G    | G | A | G | A |
| 9057 | mCV24593625 | 5 | 122625304 | A | A    | C | C | C | C |
| 9058 | mCV25181545 | 5 | 122631433 | A | A    | G | A | G | A |
| 9059 | mCV25181536 | 5 | 122631621 | G | G    | A | G | A | G |
| 9060 | mCV25181535 | 5 | 122631985 | A | A    | A | G | A | G |
| 9061 | mCV25181534 | 5 | 122632014 | G | G    | G | A | G | G |
| 9062 | mCV25181262 | 5 | 122632748 | T | T    | T | A | T | A |
| 9063 | mCV24763330 | 5 | 122634899 | A | A    | G | A | G | A |
| 9064 | mCV23328939 | 5 | 122640469 | A | A    | G | G | G | G |
| 9065 | mCV23328949 | 5 | 122641368 | G | G    | A | G | A | G |
| 9066 | mCV23328950 | 5 | 122641517 | A | A    | G | G | G | G |
| 9067 | mCV22863846 | 5 | 122644608 | C | C    | G | C | G | C |
| 9068 | mCV22863856 | 5 | 122645121 | G | G    | G | A | G | A |
| 9069 | mCV22863858 | 5 | 122645489 | A | A    | G | A | G | A |
| 9070 | mCV22863869 | 5 | 122645743 | G | G    | A | G | A | G |
| 9071 | mCV22863881 | 5 | 122646174 | G | G    | A | G | A | G |
| 9072 | mCV22863882 | 5 | 119132739 | G | G    | G | G | G | G |
| 9073 | mCV22863892 | 5 | 119133911 | A | A    | C | A | C | A |
| 9074 | mCV22863893 | 5 | 122650234 | G | G    | A | G | A | G |
| 9075 | mCV22863904 | 5 | 122651178 | C | C    | A | C | A | C |
| 9076 | mCV22863905 | 5 | 122651482 | G | G    | A | G | A | G |
| 9077 | mCV22863906 | 5 | 122651666 | A | A    | G | A | G | A |
| 9078 | mCV22864088 | 5 | 122651870 | G | G    | A | G | A | G |
| 9079 | mCV22864089 | 5 | 122652105 | C | C    | G | C | G | C |
| 9080 | mCV22864090 | 5 | 122652879 | G | G    | C | G | C | G |
| 9081 | mCV22864102 | 5 | 122657207 | C | C    | C | A | C | A |
| 9082 | mCV22864111 | 5 | 122657412 | G | G    | G | A | G | A |
| 9083 | mCV22864112 | 5 | 122657618 | A | A    | A | G | A | G |
| 9084 | mCV22864113 | 5 | 122657799 | G | G    | G | A | G | A |
| 9085 | mCV22864123 | 5 | 122657886 | A | A    | G | G | G | G |
| 9086 | mCV22864125 | 5 | 122658745 | G | G    | A | G | A | G |
| 9087 | mCV22864134 | 5 | 122658840 | A | A    | G | G | G | G |
| 9088 | mCV22864135 | 5 | 122659352 | A | A    | A | G | A | G |
| 9089 | rs4225477   | 5 | 118627667 | A | A    | G | G | G | G |
| 9090 | rs4225478   | 5 | 118627630 | C | NONE | C | C | C | C |
| 9091 | mCV22627574 | 5 | 123355119 | A | A    | T | T | T | T |
| 9092 | rs3710934   | 5 | 119951783 | A | A    | A | G | G | A |
| 9093 | rs6184919   | 5 | 118760361 | A | A    | A | A | A | A |
| 9094 | rs8239889   | 5 | 120442335 | A | A    | G | G | G | G |
| 9095 | rs8239888   | 5 | 119078055 | G | G    | A | A | A | A |
| 9096 | rs3655477   | 5 | 119464666 | A | A    | G | G | G | G |
| 9097 | rs2020514   | 5 | 119759233 | C | C    | C | C | C | C |
| 9098 | mCV25048733 | 5 | 124854429 | A | A    | T | T | T | T |
| 9099 | rs4221990   | 5 | 119838125 | A | A    | A | A | A | A |

|      |             |   |           |   |   |   |   |   |   |
|------|-------------|---|-----------|---|---|---|---|---|---|
| 9100 | rs6303499   | 5 | 120008358 | G | G | G | G | G | G |
| 9101 | rs3710640   | 5 | 120566858 | A | A | G | G | G | G |
| 9102 | rs6164615   | 5 | 120478023 | G | G | G | G | G | G |
| 9103 | rs3713339   | 5 | 121438789 | G | G | A | A | A | A |
| 9104 | rs6283454   | 5 | 121341264 | A | A | A | A | A | A |
| 9105 | rs3662726   | 5 | 121941514 | C | C | A | C | A | C |
| 9106 | rs3671202   | 5 | 122343598 | G | G | G | A | G | A |
| 9107 | rs3668379   | 5 | 122437981 | G | G | G | A | G | A |
| 9108 | rs3023057   | 5 | 123217417 | G | G | G | A | G | A |
| 9109 | rs6204114   | 5 | 123232111 | G | G | G | G | G | G |
| 9110 | rs3711485   | 5 | 123308483 | A | A | G | A | G | A |
| 9111 | rs3667069   | 5 | 123312244 | A | A | G | A | G | A |
| 9112 | mCV25307043 | 5 | 128482872 | A | A | A | A | C | A |
| 9113 | rs3711495   | 5 | 123683739 | G | G | G | A | G | G |
| 9114 | rs3692387   | 5 | 124449911 | A | G | G | G | A | G |
| 9115 | rs3702446   | 5 | 124228851 | A | G | A | G | A | A |
| 9116 | rs3701266   | 5 | 124228641 | G | A | G | A | G | G |
| 9117 | rs3669188   | 5 | 124126610 | A | G | A | G | A | A |
| 9118 | rs6395486   | 5 | 125114574 | G | G | A | G | G | G |
| 9119 | rs3663155   | 5 | 125118491 | A | G | G | G | A | A |
| 9120 | rs6316854   | 5 | 125413911 | A | A | A | A | A | A |
| 9121 | rs3721565   | 5 | 126003798 | G | A | A | G | G | G |
| 9122 | rs3659566   | 5 | 126067363 | C | C | A | A | A | A |
| 9123 | rs6208181   | 5 | 126271620 | G | G | G | G | G | G |
| 9124 | rs3689007   | 5 | 126361150 | A | G | G | A | A | G |
| 9125 | rs6345336   | 5 | 126207424 | A | G | A | G | G | A |
| 9126 | rs6287880   | 5 | 126658077 | G | G | G | G | G | G |
| 9127 | mCV23024548 | 5 | 131997673 | T | A | T | T | T | A |
| 9128 | rs3090425   | 5 | 126802262 | T | T | T | T | T | T |
| 9129 | rs4225489   | 5 | 127064826 | G | G | G | G | G | G |
| 9130 | rs3674594   | 5 | 127669017 | C | A | C | C | C | C |
| 9131 | rs6295048   | 5 | 128982919 | G | G | G | G | G | A |
| 9132 | rs3706272   | 5 | 128208675 | T | A | A | A | A | T |
| 9133 | rs6228589   | 5 | 128437142 | A | A | A | A | A | G |
| 9134 | rs3661159   | 5 | 128187011 | G | C | C | C | C | G |
| 9135 | rs6377710   | 5 | 129964072 | A | G | A | G | A | G |
| 9136 | rs3685067   | 5 | 130174980 | A | G | A | G | A | G |
| 9137 | mCV23223919 | 5 | 135105846 | A | G | G | G | G | G |
| 9138 | rs6346775   | 5 | 130758552 | A | A | A | A | A | A |
| 9139 | rs4225495   | 5 | 130478824 | G | G | G | G | G | G |
| 9140 | rs6374233   | 5 | 132750302 | G | G | G | G | G | G |
| 9141 | mCV25017167 | 5 | 137827134 | A | A | A | C | A | A |
| 9142 | rs8263003   | 5 | 133174378 | G | G | G | G | G | G |
| 9143 | rs8263013   | 5 | 133176473 | G | G | G | G | G | G |
| 9144 | rs8262988   | 5 | 133180237 | A | A | A | A | A | A |
| 9145 | rs3023058   | 5 | 133274564 | A | A | A | A | A | A |
| 9146 | rs3707215   | 5 | 133695486 | G | C | C | G | C | C |
| 9147 | rs6336873   | 5 | 133959558 | A | A | A | A | A | A |
| 9148 | rs3677166   | 5 | 134383323 | A | A | A | G | A | A |
| 9149 | rs3711751   | 5 | 134365541 | A | A | A | G | A | A |
| 9150 | rs8265855   | 5 | 135293146 | G | A | A | G | A | A |
| 9151 | rs8265922   | 5 | 135313619 | G | G | G | G | G | G |
| 9152 | rs8265966   | 5 | 135314940 | G | G | G | G | G | G |
| 9153 | rs8265964   | 5 | 135315091 | A | A | A | A | A | A |
| 9154 | rs8265976   | 5 | 135315942 | G | A | A | G | A | A |
| 9155 | rs3688124   | 5 | 135046440 | A | G | G | G | G | G |
| 9156 | rs6341225   | 5 | 135636416 | T | T | T | T | T | T |
| 9157 | rs4225536   | 5 | 135836567 | G | G | G | A | G | G |
| 9158 | rs8259893   | 5 | 136536377 | A | A | A | A | A | A |
| 9159 | rs8259892   | 5 | 136536515 | A | A | A | A | A | A |
| 9160 | rs3721911   | 5 | 137293980 | A | A | A | T | A | A |
| 9161 | rs3701629   | 5 | 137205181 | A | G | A | G | A | G |
| 9162 | rs4225541   | 5 | 137208924 | A | A | A | A | A | A |
| 9163 | mCV25009162 | 5 | 142004156 | A | G | G | A | G | A |
| 9164 | rs6367076   | 5 | 137484365 | A | A | A | A | A | A |
| 9165 | rs3717290   | 5 | 138470267 | G | A | A | A | A | A |
| 9166 | rs6292362   | 5 | 138598981 | G | G | G | G | G | G |
| 9167 | rs6342577   | 5 | 138679930 | C | C | C | C | C | C |
| 9168 | mCV23270057 | 5 | 140101364 | G | G | G | G | G | G |
| 9169 | rs3706689   | 5 | 138826808 | G | A | A | A | G | A |
| 9170 | rs3656197   | 5 | 139206611 | A | A | A | G | G | A |
| 9171 | rs3700374   | 5 | 139522305 | G | A | A | G | A | A |
| 9172 | rs4225550   | 5 | 139877041 | A | A | A | A | A | A |
| 9173 | rs3701329   | 5 | 139807314 | G | G | G | G | G | G |

|      |             |   |           |   |   |   |   |   |   |
|------|-------------|---|-----------|---|---|---|---|---|---|
| 9174 | rs6332778   | 5 | 139852979 | A | A | A | A | A | A |
| 9175 | mCV22895274 | 5 | 143907789 | A | G | G | A | G | G |
| 9176 | rs3684729   | 5 | 140361179 | G | A | A | A | G | A |
| 9177 | rs6383868   | 5 | 140887180 | A | G | G | G | G | G |
| 9178 | rs6284348   | 5 | 141098146 | C | C | C | A | C | C |
| 9179 | rs3023061   | 5 | 141390786 | A | G | G | G | G | G |
| 9180 | rs4137844   | 5 | 141406333 | G | A | A | A | A | A |
| 9181 | rs3091206   | 5 | 141479460 | A | A | A | A | A | A |
| 9182 | rs3696754   | 5 | 141905670 | G | A | A | G | A | G |
| 9183 | rs3088741   | 5 | 142335567 | A | A | A | A | A | A |
| 9184 | rs6341368   | 5 | 142348442 | A | A | A | A | A | A |
| 9185 | rs3690014   | 5 | 142759003 | A | G | G | G | G | G |
| 9186 | rs4225576   | 5 | 142653102 | A | A | A | A | A | A |
| 9187 | rs6191249   | 5 | 143668186 | G | A | A | G | A | G |
| 9188 | mCV22689215 | 5 | 147293460 | G | A | A | G | G | A |
| 9189 | rs6302473   | 5 | 143608091 | A | A | A | A | A | A |
| 9190 | rs3713156   | 5 | 143519878 | G | A | A | G | A | A |
| 9191 | rs8268085   | 5 | 143206209 | G | G | G | G | G | G |
| 9192 | rs8262798   | 5 | 143204005 | A | A | A | A | A | A |
| 9193 | rs4225605   | 5 | 144279585 | G | G | G | G | G | C |
| 9194 | rs4138683   | 5 | 144672860 | G | G | G | A | A | G |
| 9195 | mCV22936617 | 5 | 149216840 | G | A | A | A | A | A |
| 9196 | rs6229002   | 5 | 145306213 | G | A | A | G | G | A |
| 9197 | rs3686840   | 5 | 145930999 | G | G | G | A | A | A |
| 9198 | rs3687473   | 5 | 145931117 | G | G | G | A | A | A |
| 9199 | rs6336221   | 5 | 145778148 | G | G | G | G | G | G |
| 9200 | rs3668534   | 5 | 145832700 | G | G | G | A | A | A |
| 9201 | rs3681571   | 5 | 145877872 | G | G | G | A | A | A |
| 9202 | rs6239438   | 5 | 145883901 | C | C | C | C | C | C |
| 9203 | rs4225626   | 5 | 145652750 | G | G | G | G | G | G |
| 9204 | rs4225638   | 5 | 145653553 | G | G | G | G | G | G |
| 9205 | rs3666366   | 5 | 146129346 | G | C | C | G | G | C |
| 9206 | rs3710365   | 5 | 146274003 | C | A | A | C | C | A |
| 9207 | rs6189812   | 5 | 146369812 | A | A | A | A | A | A |
| 9208 | rs3681853   | 5 | 146801639 | G | A | A | G | G | A |
| 9209 | rs3718776   | 5 | 147051702 | A | A | A | G | G | A |
| 9210 | rs3090535   | 5 | 147078808 | A | A | A | A | A | A |
| 9211 | rs6221768   | 5 | 147091610 | G | G | G | G | G | G |
| 9212 | rs3692702   | 5 | 147670924 | C | G | G | C | C | G |
| 9213 | rs6198385   | 5 | 147688128 | A | C | C | A | A | C |
| 9214 | rs3722999   | 5 | 148710753 | G | A | A | A | A | A |
| 9215 | rs6306257   | 5 | 148789945 | A | G | G | G | G | G |
| 9216 | rs3161358   | 6 | 17792061  | T | A | A | A | A | A |
| 9217 | rs6338207   | 6 | 60829506  | A | A | A | A | A | A |
| 9218 | rs4225647   | 6 | 3158077   | C | C | C | C | C | C |
| 9219 | rs4225651   | 6 | 3158349   | C | C | C | C | C | C |
| 9220 | rs3661828   | 6 | 3167392   | A | A | A | G | A | A |
| 9221 | rs6312730   | 6 | 3550315   | A | A | A | A | A | A |
| 9222 | mCV25294121 | 6 | 6240972   | A | A | A | C | C | A |
| 9223 | rs6180149   | 6 | 3858687   | T | T | T | A | T | T |
| 9224 | rs3665949   | 6 | 4414308   | A | A | A | T | A | A |
| 9225 | rs6292526   | 6 | 4420740   | C | C | C | G | C | C |
| 9226 | rs6273123   | 6 | 4518414   | C | C | C | G | C | C |
| 9227 | rs6315440   | 6 | 5065696   | G | G | G | A | G | G |
| 9228 | rs6177560   | 6 | 5124386   | G | G | G | G | G | G |
| 9229 | rs6339665   | 6 | 6015044   | G | G | G | G | G | G |
| 9230 | rs3699833   | 6 | 6161470   | G | G | G | A | A | G |
| 9231 | rs6168747   | 6 | 6511310   | G | G | G | G | G | G |
| 9232 | rs3711696   | 6 | 6519830   | A | A | A | G | G | A |
| 9233 | rs3693467   | 6 | 6643542   | C | C | C | A | A | C |
| 9234 | rs3681549   | 6 | 6692081   | A | A | A | G | G | A |
| 9235 | rs6355700   | 6 | 6920517   | G | G | G | A | A | G |
| 9236 | mCV24751450 | 6 | 9790852   | G | G | A | A | G | A |
| 9237 | rs3669958   | 6 | 7448015   | C | C | A | C | C | C |
| 9238 | rs3710142   | 6 | 7795895   | G | G | A | A | G | G |
| 9239 | rs4225663   | 6 | 7969036   | A | A | A | A | A | A |
| 9240 | rs6380716   | 6 | 7992660   | G | G | A | A | G | G |
| 9241 | rs3657898   | 6 | 8295370   | G | A | A | A | A | A |
| 9242 | rs6277253   | 6 | 8687869   | G | G | G | G | G | G |
| 9243 | rs6347164   | 6 | 8959287   | G | G | G | G | G | G |
| 9244 | rs6257091   | 6 | 10028130  | A | A | A | A | A | A |
| 9245 | rs3701161   | 6 | 10110230  | A | A | A | G | A | G |
| 9246 | rs4225672   | 6 | 10747176  | A | A | A | A | A | A |
| 9247 | rs6238110   | 6 | 11794382  | A | A | G | G | A | A |

|      |             |   |          |   |   |   |   |   |   |
|------|-------------|---|----------|---|---|---|---|---|---|
| 9248 | rs3668014   | 6 | 11895693 | G | G | C | C | G | G |
| 9249 | rs3694099   | 6 | 12220868 | G | G | A | A | G | G |
| 9250 | rs6367077   | 6 | 12729411 | G | G | A | G | G | G |
| 9251 | rs6267497   | 6 | 12940301 | A | A | A | A | A | A |
| 9252 | rs3655979   | 6 | 12941155 | A | A | G | A | A | A |
| 9253 | rs3679568   | 6 | 13128025 | G | G | A | G | G | G |
| 9254 | mCV24739681 | 6 | 15983533 | T | A | A | T | A | A |
| 9255 | rs4225673   | 6 | 13381893 | G | G | G | G | G | G |
| 9256 | rs3654490   | 6 | 13936631 | A | A | G | A | A | A |
| 9257 | mCV23259040 | 6 | 16734530 | G | G | G | A | G | G |
| 9258 | rs3678711   | 6 | 14045168 | A | A | G | A | A | A |
| 9259 | rs6180825   | 6 | 14110618 | G | G | A | G | G | G |
| 9260 | rs4137688   | 6 | 14289888 | C | C | A | C | C | A |
| 9261 | rs6410396   | 6 | 14940956 | G | G | G | G | G | G |
| 9262 | rs3090437   | 6 | 15070097 | C | C | C | C | C | C |
| 9263 | rs3658616   | 6 | 15250750 | G | C | C | C | C | C |
| 9264 | mCV24734110 | 6 | 18049601 | A | G | G | A | G | G |
| 9265 | rs6286158   | 6 | 15526132 | A | A | A | A | A | A |
| 9266 | rs3725037   | 6 | 15840490 | A | G | A | A | G | G |
| 9267 | rs3705268   | 6 | 15911762 | G | A | A | G | A | A |
| 9268 | rs3090436   | 6 | 15992443 | A | A | A | A | A | A |
| 9269 | mCV25247470 | 6 | 18949600 | A | G | G | G | G | G |
| 9270 | rs3700771   | 6 | 16385609 | G | A | A | A | A | A |
| 9271 | rs3090905   | 6 | 16396375 | A | A | A | A | A | A |
| 9272 | rs6375936   | 6 | 16450958 | A | A | A | A | A | A |
| 9273 | rs3663703   | 6 | 16958509 | G | A | A | G | A | A |
| 9274 | rs3023064   | 6 | 17466136 | A | A | A | C | A | A |
| 9275 | rs6181626   | 6 | 17517562 | G | A | A | A | A | A |
| 9276 | rs3655269   | 6 | 17715100 | A | G | A | G | A | A |
| 9277 | mCV24714620 | 6 | 20583049 | G | G | A | G | G | G |
| 9278 | rs6182329   | 6 | 18284771 | G | A | A | A | A | A |
| 9279 | rs6212891   | 6 | 18285811 | G | A | A | A | A | A |
| 9280 | rs6205464   | 6 | 18357860 | G | A | A | A | A | A |
| 9281 | rs4225686   | 6 | 18690718 | A | G | G | G | G | G |
| 9282 | rs3663804   | 6 | 19283980 | G | A | A | A | A | A |
| 9283 | rs3669272   | 6 | 19446648 | T | A | A | A | A | A |
| 9284 | rs6161593   | 6 | 19645161 | G | C | C | C | C | C |
| 9285 | rs3666271   | 6 | 20274644 | A | G | G | G | G | G |
| 9286 | rs3682861   | 6 | 20275015 | G | A | A | A | A | A |
| 9287 | rs6351279   | 6 | 20296530 | A | G | A | G | G | G |
| 9288 | rs6235883   | 6 | 20906640 | A | A | A | A | A | A |
| 9289 | rs3089748   | 6 | 21539126 | A | A | A | A | A | A |
| 9290 | rs6200683   | 6 | 21830493 | A | A | A | A | A | A |
| 9291 | rs3088527   | 6 | 22701780 | C | C | A | C | C | A |
| 9292 | rs6361227   | 6 | 22995693 | C | C | C | C | C | C |
| 9293 | rs3710004   | 6 | 23029867 | A | A | A | A | A | G |
| 9294 | rs3684277   | 6 | 23074666 | A | A | G | A | A | G |
| 9295 | rs6381644   | 6 | 23271166 | G | G | G | G | G | G |
| 9296 | rs3677074   | 6 | 23348833 | C | G | C | C | C | C |
| 9297 | rs3090865   | 6 | 23556765 | A | A | A | A | A | A |
| 9298 | rs4225716   | 6 | 23910890 | A | A | A | A | A | A |
| 9299 | rs3684494   | 6 | 24248321 | C | A | C | C | A | C |
| 9300 | rs6276257   | 6 | 24629292 | G | G | G | G | G | G |
| 9301 | rs3091004   | 6 | 24634158 | G | G | G | G | G | G |
| 9302 | rs3665582   | 6 | 24784666 | A | G | A | A | G | A |
| 9303 | rs6248585   | 6 | 24976915 | C | C | C | C | C | C |
| 9304 | rs3671709   | 6 | 25646449 | G | G | A | G | G | A |
| 9305 | mCV25250213 | 6 | 28727285 | G | G | G | G | G | G |
| 9306 | rs6264221   | 6 | 26039475 | G | A | G | A | A | G |
| 9307 | rs3694385   | 6 | 26212381 | A | G | A | G | G | A |
| 9308 | rs3672206   | 6 | 26299368 | A | C | A | C | C | A |
| 9309 | rs3693271   | 6 | 26300455 | G | A | A | A | A | G |
| 9310 | rs3696686   | 6 | 26303836 | G | A | G | A | A | G |
| 9311 | rs6339670   | 6 | 26540280 | A | A | A | A | A | A |
| 9312 | rs6230858   | 6 | 27327707 | C | C | C | C | C | C |
| 9313 | rs4225722   | 6 | 28097157 | A | A | A | A | A | G |
| 9314 | rs3686145   | 6 | 28475570 | G | C | G | C | C | C |
| 9315 | rs6257799   | 6 | 28515187 | A | A | A | A | A | A |
| 9316 | rs3706286   | 6 | 28633657 | G | G | G | G | G | G |
| 9317 | rs6376031   | 6 | 29058140 | C | C | C | C | C | C |
| 9318 | rs4225731   | 6 | 29340324 | A | A | A | A | A | A |
| 9319 | rs6293344   | 6 | 29567327 | G | G | G | A | G | G |
| 9320 | rs6302781   | 6 | 29730847 | G | G | G | G | G | G |
| 9321 | rs3677815   | 6 | 29900346 | G | G | G | A | G | G |

|      |             |   |          |   |   |   |   |   |   |
|------|-------------|---|----------|---|---|---|---|---|---|
| 9322 | rs4225750   | 6 | 30096020 | A | A | A | A | A | A |
| 9323 | rs3701429   | 6 | 30157365 | G | G | G | A | G | G |
| 9324 | rs4225758   | 6 | 30538424 | G | G | G | G | G | G |
| 9325 | rs6171821   | 6 | 30803395 | A | A | A | A | A | A |
| 9326 | rs6314334   | 6 | 31429338 | G | G | G | G | G | G |
| 9327 | rs3660699   | 6 | 31572511 | G | A | A | A | A | G |
| 9328 | rs3661820   | 6 | 31572700 | G | C | C | C | C | G |
| 9329 | rs3678887   | 6 | 32186519 | A | A | A | G | A | A |
| 9330 | rs3670590   | 6 | 32199701 | A | A | A | G | A | A |
| 9331 | rs3676393   | 6 | 32203524 | A | A | A | C | A | A |
| 9332 | rs6333627   | 6 | 32315355 | A | A | A | A | A | A |
| 9333 | rs4225772   | 6 | 32857341 | G | G | G | G | G | G |
| 9334 | rs3710202   | 6 | 33581333 | A | G | G | G | G | A |
| 9335 | rs6162891   | 6 | 33849327 | C | C | C | C | C | C |
| 9336 | rs8239427   | 6 | 34209878 | C | C | C | C | C | C |
| 9337 | rs4225796   | 6 | 34406305 | A | A | A | A | A | A |
| 9338 | rs3674895   | 6 | 34461655 | A | A | A | G | A | A |
| 9339 | rs3090069   | 6 | 34511539 | A | A | A | A | A | A |
| 9340 | mCV24673275 | 6 | 37596404 | C | C | A | C | A | A |
| 9341 | rs6153151   | 6 | 34766278 | A | A | A | A | A | A |
| 9342 | rs4225802   | 6 | 34781650 | G | G | G | G | G | G |
| 9343 | rs3685011   | 6 | 34796976 | C | C | A | C | C | A |
| 9344 | rs3716901   | 6 | 35758467 | G | G | A | G | G | A |
| 9345 | rs6286891   | 6 | 35925623 | A | A | A | A | A | A |
| 9346 | rs3023067   | 6 | 35969149 | T | T | T | A | A | T |
| 9347 | rs3704635   | 6 | 36040358 | A | A | A | G | G | A |
| 9348 | rs3670489   | 6 | 36263207 | C | C | C | A | A | C |
| 9349 | rs6354750   | 6 | 36276256 | G | G | G | G | G | G |
| 9350 | rs3653923   | 6 | 36299590 | A | A | A | G | G | A |
| 9351 | rs8252871   | 6 | 36733866 | G | G | G | G | G | G |
| 9352 | rs3678202   | 6 | 36995978 | G | A | A | A | A | A |
| 9353 | rs6382825   | 6 | 37856916 | A | A | A | A | A | A |
| 9354 | rs6215575   | 6 | 38058604 | A | A | G | A | G | G |
| 9355 | rs6401658   | 6 | 38721547 | A | A | A | A | A | A |
| 9356 | rs6172651   | 6 | 39595547 | T | T | T | T | T | T |
| 9357 | rs6263401   | 6 | 40027509 | G | G | G | G | G | G |
| 9358 | rs6182787   | 6 | 40776801 | A | A | A | A | A | A |
| 9359 | rs6304139   | 6 | 41663383 | A | A | A | A | A | A |
| 9360 | mCV24657328 | 6 | 45316437 | C | G | C | C | C | G |
| 9361 | rs6372754   | 6 | 43234459 | G | G | G | G | G | G |
| 9362 | rs4225857   | 6 | 43242630 | C | C | C | C | C | C |
| 9363 | rs4225856   | 6 | 43242677 | C | C | C | C | C | C |
| 9364 | rs3662661   | 6 | 43917351 | A | A | A | G | A | G |
| 9365 | rs6258667   | 6 | 44094488 | A | A | A | A | A | A |
| 9366 | mCV22897612 | 6 | 47559396 | G | A | A | G | A | A |
| 9367 | rs3666470   | 6 | 45021385 | G | A | A | A | G | A |
| 9368 | rs3668229   | 6 | 45021639 | C | A | C | A | C | A |
| 9369 | rs6319193   | 6 | 45081840 | G | A | G | A | G | A |
| 9370 | mCV22323972 | 6 | 48305626 | A | A | A | T | A | A |
| 9371 | rs6156701   | 6 | 45744539 | G | G | G | G | G | G |
| 9372 | rs6390612   | 6 | 46436601 | G | C | G | G | G | C |
| 9373 | rs6198015   | 6 | 47430301 | C | C | C | C | C | C |
| 9374 | rs3686723   | 6 | 47632856 | A | G | G | A | G | G |
| 9375 | rs4225865   | 6 | 47712247 | C | C | C | C | C | C |
| 9376 | rs6179500   | 6 | 47812230 | C | C | C | C | C | C |
| 9377 | rs3089355   | 6 | 47853523 | A | A | A | A | A | A |
| 9378 | rs6290329   | 6 | 48462557 | A | G | G | A | G | G |
| 9379 | rs4225870   | 6 | 48510702 | A | G | A | A | A | A |
| 9380 | rs4225874   | 6 | 48510932 | G | G | G | G | G | G |
| 9381 | rs3684860   | 6 | 48907491 | G | G | C | G | C | C |
| 9382 | rs3669453   | 6 | 48900760 | G | G | G | A | G | G |
| 9383 | rs4225890   | 6 | 49051395 | A | A | G | A | G | G |
| 9384 | rs4225897   | 6 | 49267523 | A | A | A | A | A | A |
| 9385 | rs3698072   | 6 | 49369832 | C | A | A | C | A | A |
| 9386 | rs6155681   | 6 | 49599767 | A | G | G | A | G | G |
| 9387 | rs4139698   | 6 | 49813889 | G | A | A | A | A | A |
| 9388 | rs3088971   | 6 | 50071521 | G | G | G | G | G | G |
| 9389 | rs3708108   | 6 | 50169071 | G | G | G | A | G | G |
| 9390 | rs3664026   | 6 | 50179748 | G | A | A | A | A | A |
| 9391 | rs3718512   | 6 | 50309925 | G | G | G | A | G | G |
| 9392 | rs6302586   | 6 | 50314167 | G | A | A | A | A | A |
| 9393 | rs6239043   | 6 | 50948126 | A | A | A | G | A | A |
| 9394 | rs6320475   | 6 | 10765644 | C | A | A | C | A | A |
| 9395 | rs3710220   | 6 | 51145866 | G | A | A | A | A | A |

|      |             |   |          |   |   |   |   |   |   |
|------|-------------|---|----------|---|---|---|---|---|---|
| 9396 | rs3716680   | 6 | 51742743 | A | A | A | G | A | A |
| 9397 | rs3704207   | 6 | 51785906 | A | A | A | G | A | A |
| 9398 | rs6228043   | 6 | 51842843 | C | C | C | C | C | C |
| 9399 | rs3089234   | 6 | 51960028 | A | A | A | A | A | A |
| 9400 | rs3023069   | 6 | 52190471 | C | A | C | A | C | A |
| 9401 | rs4225899   | 6 | 52715551 | C | C | C | C | C | C |
| 9402 | rs6207831   | 6 | 52760601 | A | A | A | A | A | A |
| 9403 | rs3722786   | 6 | 52861881 | A | T | A | T | A | T |
| 9404 | rs3688920   | 6 | 53559932 | G | G | G | A | G | G |
| 9405 | rs3706868   | 6 | 53593969 | G | G | G | A | G | G |
| 9406 | rs6219138   | 6 | 53595273 | C | C | C | A | C | C |
| 9407 | rs3653600   | 6 | 53715471 | G | A | G | G | G | G |
| 9408 | rs6272774   | 6 | 54131745 | G | G | G | A | G | G |
| 9409 | rs6372575   | 6 | 54221556 | G | G | G | A | G | G |
| 9410 | rs4225919   | 6 | 54457424 | C | C | C | C | C | C |
| 9411 | rs4225914   | 6 | 54969688 | G | G | G | G | G | G |
| 9412 | rs3655236   | 6 | 54501546 | A | A | A | G | A | A |
| 9413 | mCV23230863 | 6 | 57474918 | G | C | C | C | C | C |
| 9414 | rs6199040   | 6 | 54764534 | C | C | C | A | C | C |
| 9415 | rs3714727   | 6 | 54950032 | C | C | C | A | C | C |
| 9416 | rs6308025   | 6 | 55132441 | G | G | G | A | G | G |
| 9417 | rs4225924   | 6 | 55298555 | G | G | G | G | G | G |
| 9418 | rs3023071   | 6 | 55410751 | G | G | G | A | G | G |
| 9419 | rs3687179   | 6 | 55479778 | G | A | A | G | A | A |
| 9420 | rs3664475   | 6 | 55518347 | T | A | A | T | A | A |
| 9421 | rs4138262   | 6 | 55980402 | A | G | G | G | G | G |
| 9422 | rs6291482   | 6 | 55993216 | G | A | A | A | A | A |
| 9423 | rs4225937   | 6 | 56090907 | G | G | G | G | G | G |
| 9424 | rs6351606   | 6 | 56838795 | A | C | C | C | C | C |
| 9425 | rs3680689   | 6 | 56849758 | T | A | A | A | A | A |
| 9426 | rs6299256   | 6 | 57600793 | A | C | C | C | C | C |
| 9427 | rs3657885   | 6 | 57639538 | G | A | A | A | A | A |
| 9428 | rs6172269   | 6 | 58003691 | A | A | A | A | A | A |
| 9429 | rs4225947   | 6 | 58696969 | G | G | G | G | G | G |
| 9430 | rs4225950   | 6 | 58939188 | A | A | A | A | A | A |
| 9431 | rs6251021   | 6 | 59454182 | G | G | G | G | G | G |
| 9432 | rs3089524   | 6 | 60080963 | A | A | A | A | A | A |
| 9433 | mCV22357717 | 6 | 61526265 | G | A | A | A | A | A |
| 9434 | rs6212857   | 6 | 61065869 | A | A | A | A | A | A |
| 9435 | rs3672806   | 6 | 61306235 | A | G | G | G | G | G |
| 9436 | rs6393315   | 6 | 61408211 | G | A | A | A | A | A |
| 9437 | rs6154559   | 6 | 62092666 | G | A | A | A | A | A |
| 9438 | rs3705231   | 6 | 62157950 | A | A | A | A | A | A |
| 9439 | mCV24558382 | 6 | 64479451 | A | A | G | A | G | A |
| 9440 | rs6203413   | 6 | 63274630 | T | A | A | A | A | A |
| 9441 | rs3721391   | 6 | 63320432 | A | C | C | C | C | C |
| 9442 | rs3724916   | 6 | 63434326 | G | A | A | A | A | A |
| 9443 | mCV22576656 | 6 | 65132955 | G | G | A | G | A | G |
| 9444 | rs6152576   | 6 | 63684569 | G | A | A | A | A | A |
| 9445 | rs3686305   | 6 | 63830085 | A | G | G | G | G | G |
| 9446 | rs3089540   | 6 | 64222243 | A | A | A | A | G | A |
| 9447 | rs3089541   | 6 | 64222303 | G | G | G | G | G | G |
| 9448 | rs3697325   | 6 | 64279555 | A | A | C | A | C | A |
| 9449 | rs4136902   | 6 | 64299739 | A | A | G | A | G | A |
| 9450 | rs6160457   | 6 | 64368321 | A | A | G | A | G | A |
| 9451 | rs6160989   | 6 | 65213559 | G | G | G | G | G | G |
| 9452 | rs8270116   | 6 | 65221128 | T | T | A | T | A | T |
| 9453 | rs8270121   | 6 | 65223957 | C | C | C | C | C | C |
| 9454 | rs4225954   | 6 | 65941419 | G | G | G | G | G | G |
| 9455 | rs3089195   | 6 | 66539144 | C | C | C | C | C | C |
| 9456 | rs6320818   | 6 | 66619473 | T | T | T | T | T | T |
| 9457 | rs3090935   | 6 | 67147970 | C | C | C | C | C | C |
| 9458 | rs6157367   | 6 | 67399954 | A | A | A | T | A | A |
| 9459 | rs4225970   | 6 | 67407049 | A | A | A | A | A | A |
| 9460 | rs4225973   | 6 | 67407161 | A | A | A | A | A | A |
| 9461 | mCV24561783 | 6 | 68077964 | A | A | A | A | A | A |
| 9462 | mCV27563186 | 6 | 71079194 | A | G | A | G | G | G |
| 9463 | mCV24929761 | 6 | 71823606 | A | A | C | A | C | A |
| 9464 | rs6177126   | 6 | 70336034 | C | C | C | C | C | C |
| 9465 | mCV23348277 | 6 | 72456837 | A | A | G | A | G | A |
| 9466 | rs6323214   | 6 | 71148204 | C | C | C | C | C | C |
| 9467 | rs4225976   | 6 | 71408170 | G | G | G | G | G | G |
| 9468 | rs4225979   | 6 | 71580466 | G | G | G | G | G | G |
| 9469 | rs3723437   | 6 | 71596090 | T | T | A | T | A | T |



|      |             |   |          |   |   |   |   |   |   |
|------|-------------|---|----------|---|---|---|---|---|---|
| 9470 | rs3665567   | 6 | 71596382 | A | A | G | A | G | A |
| 9471 | rs6246241   | 6 | 71998176 | A | A | G | A | G | A |
| 9472 | rs6243983   | 6 | 72069405 | A | A | T | A | T | A |
| 9473 | rs4225996   | 6 | 72109892 | A | A | G | A | G | A |
| 9474 | rs4225998   | 6 | 72110069 | G | G | C | G | C | G |
| 9475 | rs3673305   | 6 | 72148155 | C | C | A | C | A | C |
| 9476 | mCV24572596 | 6 | 75426013 | G | G | G | A | G | G |
| 9477 | rs3717302   | 6 | 73401556 | C | C | C | G | C | C |
| 9478 | rs6191521   | 6 | 73554469 | T | T | T | A | T | T |
| 9479 | rs6382785   | 6 | 73881876 | C | C | C | C | C | C |
| 9480 | rs3725176   | 6 | 73929048 | A | A | G | G | G | A |
| 9481 | rs3719988   | 6 | 73958293 | A | A | A | G | A | A |
| 9482 | rs3663417   | 6 | 74802824 | G | G | G | A | G | G |
| 9483 | rs6309736   | 6 | 74829036 | A | A | A | C | A | A |
| 9484 | rs3659285   | 6 | 74962608 | G | G | G | A | G | G |
| 9485 | rs3712284   | 6 | 74995203 | C | C | C | A | C | C |
| 9486 | rs3672029   | 6 | 75631345 | A | A | A | C | A | A |
| 9487 | rs6411497   | 6 | 75750645 | G | G | A | A | A | G |
| 9488 | rs3710429   | 6 | 75776014 | G | G | A | A | A | G |
| 9489 | rs3659315   | 6 | 75777359 | A | A | A | G | G | A |
| 9490 | mCV25007388 | 6 | 78038399 | A | G | G | G | G | G |
| 9491 | rs3686586   | 6 | 76026695 | A | A | G | G | G | A |
| 9492 | rs6234428   | 6 | 76036137 | G | G | A | A | A | G |
| 9493 | rs3699863   | 6 | 76063904 | G | G | A | A | A | G |
| 9494 | rs4226002   | 6 | 76217717 | C | C | C | C | C | C |
| 9495 | rs3699367   | 6 | 76679118 | A | C | C | A | C | C |
| 9496 | rs4136200   | 6 | 77033114 | A | A | G | G | G | G |
| 9497 | rs6344545   | 6 | 77072638 | A | A | G | G | G | G |
| 9498 | rs3724558   | 6 | 77098302 | G | G | A | A | A | A |
| 9499 | rs3706039   | 6 | 77343585 | G | G | A | G | A | A |
| 9500 | rs3663024   | 6 | 77763528 | G | G | G | A | G | G |
| 9501 | rs6412632   | 6 | 77876232 | C | C | C | C | C | C |
| 9502 | rs4226013   | 6 | 78704205 | G | G | G | G | G | G |
| 9503 | rs6259164   | 6 | 78776040 | G | G | A | A | A | A |
| 9504 | mCV23923871 | 6 | 81736483 | C | A | C | C | C | A |
| 9505 | rs3717633   | 6 | 79653940 | A | G | G | G | G | G |
| 9506 | rs6302422   | 6 | 79825735 | A | A | A | A | A | A |
| 9507 | rs3694069   | 6 | 79826449 | G | A | A | A | A | A |
| 9508 | rs6377140   | 6 | 80032286 | G | G | A | A | A | G |
| 9509 | rs6331100   | 6 | 81084801 | T | T | A | A | A | T |
| 9510 | rs3698364   | 6 | 81140583 | A | G | A | G | G | G |
| 9511 | rs6181382   | 6 | 81674296 | A | G | A | A | A | G |
| 9512 | rs4226026   | 6 | 82185657 | A | A | A | A | A | A |
| 9513 | rs4226027   | 6 | 82185782 | A | A | G | G | G | A |
| 9514 | rs3691925   | 6 | 82188051 | A | A | C | C | C | A |
| 9515 | rs6308628   | 6 | 82758911 | G | A | A | A | A | A |
| 9516 | rs3152159   | 6 | 82980113 | C | C | A | A | A | C |
| 9517 | mCV24996788 | 6 | 84667724 | A | A | A | A | A | A |
| 9518 | rs4226028   | 6 | 83825455 | A | G | G | G | G | G |
| 9519 | rs4226036   | 6 | 84714866 | A | A | A | A | A | A |
| 9520 | rs6280381   | 6 | 83902721 | A | A | G | G | G | A |
| 9521 | rs4226046   | 6 | 84006793 | C | C | C | C | C | C |
| 9522 | rs4226048   | 6 | 84007106 | G | G | A | A | A | G |
| 9523 | rs6384008   | 6 | 84260732 | A | A | A | A | A | A |
| 9524 | mCV24609370 | 6 | 87070705 | G | G | G | A | G | G |
| 9525 | mCV24609371 | 6 | 87070848 | G | G | G | A | G | G |
| 9526 | mCV24609372 | 6 | 87070902 | G | G | G | A | G | G |
| 9527 | mCV24609382 | 6 | 87071701 | G | G | G | A | G | G |
| 9528 | mCV24609384 | 6 | 87072455 | A | A | A | G | A | A |
| 9529 | mCV24609655 | 6 | 87072551 | G | G | G | A | G | G |
| 9530 | mCV24609657 | 6 | 87074787 | A | A | A | G | A | A |
| 9531 | mCV24609668 | 6 | 87075045 | G | G | G | A | G | G |
| 9532 | mCV24609678 | 6 | 87075229 | C | C | C | G | C | C |
| 9533 | mCV24609690 | 6 | 87076117 | G | G | G | A | G | G |
| 9534 | mCV24609692 | 6 | 87076262 | G | G | G | A | G | G |
| 9535 | mCV24609702 | 6 | 87076454 | A | A | A | G | A | A |
| 9536 | mCV24609704 | 6 | 87076774 | G | G | G | A | G | G |
| 9537 | mCV24609711 | 6 | 87076825 | G | G | G | A | G | G |
| 9538 | mCV24609712 | 6 | 87077363 | A | A | A | G | A | A |
| 9539 | mCV24609713 | 6 | 87077471 | C | C | C | A | C | C |
| 9540 | mCV24609730 | 6 | 87077947 | A | A | A | A | A | A |
| 9541 | mCV23945442 | 6 | 87079291 | T | T | T | A | T | T |
| 9542 | mCV23945452 | 6 | 87080589 | G | G | G | G | G | G |
| 9543 | mCV23945453 | 6 | 87089469 | A | A | A | G | A | A |

|      |             |   |          |   |   |   |   |   |   |
|------|-------------|---|----------|---|---|---|---|---|---|
| 9544 | mCV23945465 | 6 | 87093506 | A | A | A | G | A | A |
| 9545 | mCV23945466 | 6 | 87093939 | G | G | G | A | G | G |
| 9546 | mCV23945476 | 6 | 87097235 | T | A | T | T | T | T |
| 9547 | mCV23945478 | 6 | 87103512 | A | A | A | C | A | A |
| 9548 | mCV23945488 | 6 | 87103524 | G | G | G | A | G | G |
| 9549 | mCV23945762 | 6 | 87103992 | G | G | G | A | G | G |
| 9550 | mCV23945772 | 6 | 87104462 | G | G | G | A | G | G |
| 9551 | mCV23945773 | 6 | 87104562 | G | G | G | A | G | G |
| 9552 | mCV23945783 | 6 | 87104999 | A | A | A | G | A | A |
| 9553 | mCV23945785 | 6 | 87105082 | A | A | A | G | A | A |
| 9554 | mCV23945795 | 6 | 87105189 | G | G | G | A | G | G |
| 9555 | mCV23945796 | 6 | 87105223 | A | A | A | G | A | A |
| 9556 | mCV23945808 | 6 | 87105538 | A | A | A | G | A | A |
| 9557 | mCV23945819 | 6 | 87105596 | G | G | G | A | G | G |
| 9558 | mCV23945820 | 6 | 87105620 | G | G | G | A | G | G |
| 9559 | mCV23945830 | 6 | 87105769 | A | A | A | G | A | A |
| 9560 | mCV23945832 | 6 | 87106474 | C | C | C | A | C | C |
| 9561 | mCV23946102 | 6 | 87107046 | G | G | G | A | G | G |
| 9562 | mCV23946108 | 6 | 87107098 | A | A | A | G | A | A |
| 9563 | mCV23946117 | 6 | 87110285 | A | A | A | G | A | A |
| 9564 | mCV23946126 | 6 | 87111446 | A | A | A | G | A | A |
| 9565 | mCV23946127 | 6 | 87112300 | T | T | T | A | T | T |
| 9566 | mCV23946128 | 6 | 87112839 | C | C | C | A | C | C |
| 9567 | mCV23946135 | 6 | 87112916 | C | C | C | A | C | C |
| 9568 | mCV23946136 | 6 | 87113000 | A | A | A | G | A | A |
| 9569 | mCV23946137 | 6 | 87113554 | G | G | G | A | G | G |
| 9570 | mCV23946144 | 6 | 87113559 | G | G | G | A | G | G |
| 9571 | mCV23946145 | 6 | 87113600 | C | C | C | A | C | C |
| 9572 | mCV23946153 | 6 | 87113855 | C | C | C | A | C | C |
| 9573 | mCV23946155 | 6 | 87114407 | A | A | A | T | A | A |
| 9574 | mCV23946169 | 6 | 87114686 | A | A | A | G | A | A |
| 9575 | rs6325249   | 6 | 84816591 | A | A | A | A | A | A |
| 9576 | mCV23946174 | 6 | 87114958 | G | G | G | A | G | G |
| 9577 | mCV23946175 | 6 | 87115002 | A | A | A | G | A | A |
| 9578 | mCV25186131 | 6 | 87116062 | A | A | A | G | A | A |
| 9579 | mCV25186132 | 6 | 87116396 | A | A | A | G | A | A |
| 9580 | mCV25186133 | 6 | 87116906 | A | A | A | G | A | A |
| 9581 | mCV25186663 | 6 | 87117993 | G | G | G | A | G | G |
| 9582 | mCV22847896 | 6 | 87119116 | G | G | G | A | G | G |
| 9583 | mCV22847897 | 6 | 87119156 | A | A | A | C | A | A |
| 9584 | mCV22847898 | 6 | 87120681 | G | G | G | A | G | G |
| 9585 | mCV22847909 | 6 | 87121306 | G | G | G | G | G | G |
| 9586 | mCV22847922 | 6 | 87122442 | C | C | C | A | C | C |
| 9587 | mCV22847923 | 6 | 87122456 | A | A | A | G | A | A |
| 9588 | mCV22848107 | 6 | 87123074 | A | A | A | G | A | A |
| 9589 | mCV22848108 | 6 | 87123125 | A | A | A | G | A | A |
| 9590 | mCV22848109 | 6 | 87125088 | A | A | A | G | A | A |
| 9591 | mCV22848121 | 6 | 87125918 | G | G | G | A | G | G |
| 9592 | mCV22848131 | 6 | 87126780 | A | A | A | C | A | A |
| 9593 | rs3662130   | 6 | 85043367 | A | C | C | C | C | C |
| 9594 | rs6317737   | 6 | 85659308 | A | A | A | A | A | A |
| 9595 | rs6268328   | 6 | 86736209 | C | C | C | A | C | C |
| 9596 | rs4221991   | 6 | 86745667 | A | A | A | A | A | A |
| 9597 | rs4221995   | 6 | 86745902 | T | T | T | A | T | T |
| 9598 | rs4226061   | 6 | 86963614 | A | A | A | G | A | A |
| 9599 | rs4226063   | 6 | 86963688 | A | A | A | G | A | A |
| 9600 | rs6209558   | 6 | 86988811 | A | A | A | G | A | A |
| 9601 | rs4226074   | 6 | 87070336 | G | G | G | G | G | G |
| 9602 | rs6268125   | 6 | 87214811 | C | C | C | A | C | C |
| 9603 | rs3677567   | 6 | 87604055 | G | G | G | G | G | G |
| 9604 | rs3712958   | 6 | 87831455 | G | G | G | G | G | G |
| 9605 | rs3676646   | 6 | 87902736 | A | G | G | G | G | G |
| 9606 | mCV24614895 | 6 | 89046445 | G | A | G | G | G | G |
| 9607 | rs6314354   | 6 | 88014594 | G | G | G | G | G | G |
| 9608 | rs3089307   | 6 | 88688843 | C | C | C | C | C | C |
| 9609 | rs4135401   | 6 | 88714929 | A | A | A | A | A | A |
| 9610 | rs3668979   | 6 | 88984171 | G | A | G | A | G | G |
| 9611 | rs6195822   | 6 | 89025012 | C | A | C | A | C | C |
| 9612 | rs3671004   | 6 | 89036720 | G | C | G | C | G | G |
| 9613 | rs3713705   | 6 | 89055087 | A | A | A | C | A | A |
| 9614 | mCV23257111 | 6 | 91707639 | G | A | G | G | G | G |
| 9615 | rs4226089   | 6 | 89485781 | G | A | G | A | G | G |
| 9616 | rs6190582   | 6 | 89642953 | A | G | A | A | A | A |
| 9617 | rs3701169   | 6 | 89686517 | A | A | A | C | A | A |

|      |             |   |           |   |     |   |   |   |   |
|------|-------------|---|-----------|---|-----|---|---|---|---|
| 9618 | rs6330399   | 6 | 90413491  | A | T   | A | A | A | A |
| 9619 | rs3661039   | 6 | 90696160  | A | A   | A | C | A | A |
| 9620 | rs4226131   | 6 | 90742264  | G | G   | G | G | G | G |
| 9621 | rs4226133   | 6 | 90816023  | A | A   | A | A | A | A |
| 9622 | rs6156752   | 6 | 91115486  | A | A   | A | G | A | A |
| 9623 | rs3680743   | 6 | 91514685  | A | G   | G | G | A | G |
| 9624 | rs3683775   | 6 | 91591146  | G | A   | A | A | G | A |
| 9625 | rs4226134   | 6 | 92155618  | G | G   | G | G | G | G |
| 9626 | rs3704682   | 6 | 92377910  | A | A   | C | C | A | C |
| 9627 | rs3091092   | 6 | 92594013  | G | G   | G | G | G | G |
| 9628 | rs3691686   | 6 | 92952138  | G | G   | A | A | G | A |
| 9629 | rs6223362   | 6 | 92975843  | A | A   | A | G | A | A |
| 9630 | rs3723136   | 6 | 93022028  | G | G   | A | G | G | G |
| 9631 | rs3716206   | 6 | 93247281  | C | A/C | C | A | C | C |
| 9632 | mCV24791247 | 6 | 95949403  | A | A   | A | A | G | G |
| 9633 | rs6285738   | 6 | 93892091  | G | G   | A | G | G | G |
| 9634 | rs6239023   | 6 | 94413050  | A | A   | G | G | G | A |
| 9635 | rs6193006   | 6 | 94643264  | G | G   | A | G | G | G |
| 9636 | rs3718968   | 6 | 94883844  | G | G   | A | G | G | G |
| 9637 | rs3720133   | 6 | 94884022  | G | G   | A | G | G | G |
| 9638 | rs3659436   | 6 | 95011700  | G | G   | G | A | G | G |
| 9639 | rs6226609   | 6 | 95048665  | G | G   | G | A | G | G |
| 9640 | rs4226142   | 6 | 95615475  | C | C   | C | C | C | C |
| 9641 | rs6344085   | 6 | 95870755  | A | A   | A | A | G | A |
| 9642 | rs3090144   | 6 | 96569906  | C | C   | C | C | C | C |
| 9643 | rs6308758   | 6 | 96962182  | A | A   | A | A | G | A |
| 9644 | rs6349084   | 6 | 97121415  | G | A   | G | G | A | A |
| 9645 | rs3090740   | 6 | 97360646  | A | A   | A | A | A | A |
| 9646 | rs3023081   | 6 | 97661458  | G | A   | G | G | G | A |
| 9647 | rs4226156   | 6 | 97665288  | G | G   | G | G | G | G |
| 9648 | rs4226157   | 6 | 97665320  | C | C   | C | C | C | C |
| 9649 | rs6234973   | 6 | 98059474  | A | G   | A | A | G | G |
| 9650 | rs3702663   | 6 | 98686528  | G | A   | A | G | A | A |
| 9651 | rs4138572   | 6 | 98790763  | A | G   | G | A | G | G |
| 9652 | rs6294376   | 6 | 98962961  | G | G   | G | G | G | G |
| 9653 | rs6243885   | 6 | 99754807  | C | C   | C | C | C | C |
| 9654 | rs4226159   | 6 | 100006710 | G | G   | G | G | G | G |
| 9655 | mCV23117732 | 6 | 103251269 | T | A   | T | T | T | T |
| 9656 | rs6326610   | 6 | 101030119 | A | A   | A | A | A | A |
| 9657 | rs3718735   | 6 | 101508462 | G | G   | G | A | G | A |
| 9658 | rs3663448   | 6 | 101542613 | A | A   | A | G | A | G |
| 9659 | rs6396159   | 6 | 101801742 | T | T   | T | A | T | T |
| 9660 | rs3694444   | 6 | 101838023 | G | G   | G | A | G | G |
| 9661 | rs3678079   | 6 | 101868513 | G | G   | G | C | G | G |
| 9662 | rs6323483   | 6 | 102626389 | G | G   | G | A | G | A |
| 9663 | rs3672073   | 6 | 102863317 | A | A   | A | G | A | G |
| 9664 | rs6303579   | 6 | 102971130 | G | G   | G | G | G | G |
| 9665 | rs3692519   | 6 | 103850659 | C | A   | A | A | A | A |
| 9666 | rs4226164   | 6 | 104111155 | T | T   | T | T | T | T |
| 9667 | rs4226162   | 6 | 104111424 | G | G   | G | G | G | G |
| 9668 | rs6221826   | 6 | 104277893 | G | G   | G | G | G | G |
| 9669 | rs3691330   | 6 | 104559313 | A | C   | C | A | A | A |
| 9670 | rs6202661   | 6 | 104733791 | A | G   | G | A | A | G |
| 9671 | mCV24647857 | 6 | 107658117 | T | A   | A | A | A | T |
| 9672 | rs6292642   | 6 | 104934072 | C | C   | C | A | A | C |
| 9673 | rs3677553   | 6 | 104960377 | G | G   | G | A | A | G |
| 9674 | rs3671969   | 6 | 105115728 | A | A   | A | G | G | A |
| 9675 | rs3722170   | 6 | 105265106 | A | A   | A | G | G | A |
| 9676 | rs3676140   | 6 | 105268876 | T | A   | A | T | T | T |
| 9677 | rs6208251   | 6 | 105270851 | G | A   | A | G | G | A |
| 9678 | rs3667187   | 6 | 105606247 | A | A   | A | G | G | G |
| 9679 | rs3718253   | 6 | 106356052 | G | A   | A | G | G | G |
| 9680 | rs6344812   | 6 | 106399804 | A | A   | A | G | A | A |
| 9681 | rs3688307   | 6 | 106450850 | A | A   | A | G | A | A |
| 9682 | rs3725108   | 6 | 106507018 | T | T   | T | A | T | T |
| 9683 | rs6314022   | 6 | 106779555 | A | C   | C | A | C | A |
| 9684 | rs6216848   | 6 | 106912146 | G | G   | G | A | G | G |
| 9685 | rs3703994   | 6 | 106917378 | A | A   | A | C | A | A |
| 9686 | rs3691050   | 6 | 106920335 | A | T   | T | A | T | A |
| 9687 | rs3657731   | 6 | 107019973 | A | A   | A | G | A | A |
| 9688 | rs4226166   | 6 | 107173366 | G | G   | G | G | G | G |
| 9689 | rs4226167   | 6 | 107173546 | A | A   | A | A | A | A |
| 9690 | rs3703026   | 6 | 108133583 | A | A   | A | G | G | G |
| 9691 | rs6221865   | 6 | 108176275 | C | C   | C | C | A | C |

|      |             |   |           |   |   |      |      |      |   |
|------|-------------|---|-----------|---|---|------|------|------|---|
| 9692 | rs3655148   | 6 | 108183645 | A | A | A    | G    | G    | A |
| 9693 | rs3702255   | 6 | 108358015 | C | C | C    | A    | NONE | C |
| 9694 | rs3023084   | 6 | 108852931 | G | G | G    | G    | A    | G |
| 9695 | rs3089219   | 6 | 108852953 | C | C | NONE | C    | C    | C |
| 9696 | rs6239446   | 6 | 108926981 | G | G | G    | A    | G    | G |
| 9697 | rs6233194   | 6 | 109044672 | A | G | G    | G    | A    | A |
| 9698 | rs3722224   | 6 | 109099435 | A | A | A    | C    | C    | A |
| 9699 | rs3723422   | 6 | 109099648 | A | G | G    | A    | G    | A |
| 9700 | rs4226177   | 6 | 109238569 | G | G | G    | G    | G    | G |
| 9701 | rs3688610   | 6 | 109248452 | G | G | G    | A    | A    | G |
| 9702 | mCV24107884 | 6 | 110746472 | A | G | A    | A    | G    | A |
| 9703 | rs6270048   | 6 | 109694094 | A | A | G    | A    | G    | A |
| 9704 | rs4138146   | 6 | 109912067 | A | G | G    | G    | G    | A |
| 9705 | rs6256236   | 6 | 110228065 | A | A | A    | G    | A    | A |
| 9706 | mCV24788350 | 6 | 113337615 | A | A | G    | A    | G    | G |
| 9707 | rs3668709   | 6 | 110396763 | G | G | G    | A    | G    | G |
| 9708 | rs3670475   | 6 | 110397055 | A | A | C    | A    | C    | A |
| 9709 | rs3716629   | 6 | 110710569 | G | A | G    | G    | A    | G |
| 9710 | rs6250128   | 6 | 110791152 | A | A | A    | A    | A    | A |
| 9711 | rs6386722   | 6 | 111079059 | G | G | G    | G    | G    | G |
| 9712 | rs3690473   | 6 | 111262564 | G | C | G    | C    | C    | C |
| 9713 | rs3722772   | 6 | 111802735 | G | G | G    | A    | G    | G |
| 9714 | rs3723911   | 6 | 111802901 | C | C | C    | A    | C    | C |
| 9715 | rs3698226   | 6 | 111944017 | C | C | C    | NONE | C    | C |
| 9716 | rs6290844   | 6 | 111979111 | A | A | G    | G    | A    | G |
| 9717 | rs6331868   | 6 | 112020795 | G | A | A    | A    | A    | G |
| 9718 | mCV24115224 | 6 | 115030499 | G | A | G    | A    | G    | G |
| 9719 | rs4138136   | 6 | 112574689 | A | G | A    | A    | G    | A |
| 9720 | rs3089440   | 6 | 113258243 | A | A | A    | A    | A    | A |
| 9721 | rs2228903   | 6 | 113742528 | A | A | A    | A    | A    | A |
| 9722 | rs6155326   | 6 | 115072187 | A | A | G    | A    | G    | G |
| 9723 | rs3693392   | 6 | 113842151 | G | G | A    | G    | G    | A |
| 9724 | rs4226201   | 6 | 113909952 | C | C | C    | C    | C    | C |
| 9725 | rs4226202   | 6 | 113990801 | A | A | A    | A    | A    | A |
| 9726 | mCV23042866 | 6 | 117147180 | C | A | C    | A    | C    | A |
| 9727 | rs3680164   | 6 | 114380213 | C | C | C    | C    | A    | A |
| 9728 | rs2228931   | 6 | 115638568 | G | G | G    | G    | G    | G |
| 9729 | rs6241276   | 6 | 114406699 | A | A | G    | A    | G    | G |
| 9730 | rs8259195   | 6 | 114823368 | A | A | A    | A    | A    | A |
| 9731 | rs8259354   | 6 | 114835146 | C | C | C    | C    | C    | C |
| 9732 | rs3709206   | 6 | 114870193 | A | G | G    | G    | A    | A |
| 9733 | rs6393943   | 6 | 114932370 | A | G | G    | G    | A    | A |
| 9734 | rs3720842   | 6 | 114972506 | A | G | A    | G    | A    | A |
| 9735 | rs8243438   | 6 | 115005944 | G | G | A    | G    | G    | G |
| 9736 | rs3023088   | 6 | 115557643 | A | A | G    | A    | A    | A |
| 9737 | rs4226207   | 6 | 115669743 | G | G | G    | G    | G    | G |
| 9738 | rs8254778   | 6 | 115749258 | A | A | G    | A    | A    | A |
| 9739 | rs8254782   | 6 | 115878764 | A | A | G    | A    | A    | A |
| 9740 | rs3705972   | 6 | 116177465 | A | A | C    | A    | A    | A |
| 9741 | rs3722915   | 6 | 116251732 | T | T | A    | T    | T    | T |
| 9742 | rs6204829   | 6 | 116303467 | A | G | A    | G    | A    | A |
| 9743 | rs3668689   | 6 | 116318240 | A | G | G    | G    | A    | G |
| 9744 | rs4226214   | 6 | 116330113 | G | G | A    | G    | G    | G |
| 9745 | rs3722084   | 6 | 116376059 | C | G | G    | G    | C    | G |
| 9746 | rs6401637   | 6 | 116477552 | G | A | G    | A    | G    | G |
| 9747 | rs3717778   | 6 | 116777385 | C | A | C    | A    | C    | A |
| 9748 | rs4226224   | 6 | 116800560 | G | G | G    | G    | G    | G |
| 9749 | rs4226225   | 6 | 116800621 | A | G | G    | G    | A    | G |
| 9750 | rs8245876   | 6 | 117562025 | G | G | G    | G    | G    | C |
| 9751 | rs8245877   | 6 | 117562115 | G | G | G    | G    | G    | G |
| 9752 | rs6380803   | 6 | 117672619 | A | A | A    | A    | A    | C |
| 9753 | rs3716551   | 6 | 118860281 | A | C | C    | C    | A    | C |
| 9754 | mCV24892629 | 6 | 121702158 | G | G | G    | A    | A    | A |
| 9755 | rs6309473   | 6 | 119087694 | G | A | A    | A    | G    | G |
| 9756 | rs3707602   | 6 | 119356834 | G | G | G    | A    | G    | G |
| 9757 | rs4137862   | 6 | 119576264 | C | A | A    | C    | C    | C |
| 9758 | rs6306957   | 6 | 119802898 | C | G | G    | G    | C    | C |
| 9759 | rs4226235   | 6 | 119824419 | A | G | G    | G    | A    | A |
| 9760 | rs4226241   | 6 | 119824591 | G | G | G    | G    | G    | G |
| 9761 | rs3718884   | 6 | 120148978 | A | A | A    | G    | A    | G |
| 9762 | rs3721974   | 6 | 120197698 | G | A | A    | A    | G    | A |
| 9763 | rs6257337   | 6 | 120358766 | C | C | C    | C    | C    | C |
| 9764 | rs3695724   | 6 | 120403722 | T | T | T    | A    | T    | A |
| 9765 | rs2020691   | 6 | 120436078 | A | A | A    | A    | A    | A |

|      |             |   |           |   |   |   |   |   |   |
|------|-------------|---|-----------|---|---|---|---|---|---|
| 9766 | rs6211640   | 6 | 121490896 | G | G | G | A | A | A |
| 9767 | rs3723821   | 6 | 121529823 | G | G | G | A | A | A |
| 9768 | rs6342020   | 6 | 121825584 | A | A | A | A | A | A |
| 9769 | rs6303910   | 6 | 122025275 | A | A | A | A | A | A |
| 9770 | rs3709324   | 6 | 122048530 | A | A | A | T | T | T |
| 9771 | rs3727110   | 6 | 122527688 | A | A | A | T | A | A |
| 9772 | rs8258829   | 6 | 122941147 | C | C | C | C | C | C |
| 9773 | rs3023093   | 6 | 122941218 | C | C | C | A | C | C |
| 9774 | rs6308350   | 6 | 122944401 | A | A | A | A | A | A |
| 9775 | rs3722157   | 6 | 123050511 | C | C | C | G | G | G |
| 9776 | rs6365235   | 6 | 124740027 | G | G | G | G | G | G |
| 9777 | rs3714944   | 6 | 125731325 | G | A | A | G | A | A |
| 9778 | rs3716297   | 6 | 125731562 | T | A | A | T | A | A |
| 9779 | rs6276451   | 6 | 125873555 | G | G | G | G | G | G |
| 9780 | rs3684245   | 6 | 125990135 | A | G | G | A | G | G |
| 9781 | rs6200835   | 6 | 126340874 | G | A | A | A | A | A |
| 9782 | rs6201882   | 6 | 126530929 | G | A | A | A | A | A |
| 9783 | rs6189836   | 6 | 127188740 | A | G | G | G | G | G |
| 9784 | rs6389420   | 6 | 127676012 | A | G | G | A | G | G |
| 9785 | rs4226273   | 6 | 127716362 | A | A | A | A | A | A |
| 9786 | rs4226280   | 6 | 127716606 | A | G | G | A | G | G |
| 9787 | rs3708837   | 6 | 127800257 | G | A | A | G | A | A |
| 9788 | mCV24646413 | 6 | 129352951 | A | G | G | A | G | G |
| 9789 | rs3673730   | 6 | 128402950 | A | A | A | C | A | A |
| 9790 | rs3698224   | 6 | 128484855 | G | G | G | A | G | G |
| 9791 | rs6390151   | 6 | 128541601 | G | G | G | A | G | A |
| 9792 | mCV22521691 | 6 | 132934802 | T | A | A | T | A | T |
| 9793 | rs3681620   | 6 | 128654310 | G | G | G | A | G | G |
| 9794 | rs3654472   | 6 | 128992745 | G | G | G | A | G | G |
| 9795 | rs3670851   | 6 | 129225234 | G | G | G | A | G | G |
| 9796 | rs6354131   | 6 | 129234018 | A | A | A | G | A | A |
| 9797 | rs3709615   | 6 | 129512920 | G | G | G | A | G | A |
| 9798 | rs4226301   | 6 | 129541739 | A | A | A | C | A | C |
| 9799 | rs6338676   | 6 | 129811183 | G | G | G | A | G | A |
| 9800 | rs3696743   | 6 | 130182816 | G | A | A | G | A | A |
| 9801 | rs4226310   | 6 | 130203071 | A | A | A | A | A | A |
| 9802 | rs3662241   | 6 | 130271567 | A | G | G | A | G | A |
| 9803 | rs6375880   | 6 | 130282498 | G | A | A | G | A | A |
| 9804 | rs6169509   | 6 | 131152582 | T | A | A | A | A | T |
| 9805 | rs6307910   | 6 | 131203637 | A | A | A | G | A | A |
| 9806 | rs3654483   | 6 | 131216000 | A | G | G | A | G | A |
| 9807 | mCV23007537 | 6 | 145567593 | A | A | G | G | G | A |
| 9808 | rs3722480   | 6 | 131616421 | G | A | A | G | A | A |
| 9809 | rs3699247   | 6 | 131621532 | A | C | C | A | C | A |
| 9810 | rs6290696   | 6 | 131622994 | A | G | G | A | G | A |
| 9811 | rs3677485   | 6 | 131740498 | A | A | A | G | A | A |
| 9812 | mCV23509699 | 6 | 133078488 | A | C | C | A | C | C |
| 9813 | rs3688358   | 6 | 131958443 | A | A | A | T | A | A |
| 9814 | rs3704289   | 6 | 132322704 | G | C | C | G | C | G |
| 9815 | rs3695948   | 6 | 132331850 | A | A | A | C | A | C |
| 9816 | rs6312743   | 6 | 132975892 | A | G | G | A | G | A |
| 9817 | rs4226321   | 6 | 133171895 | G | A | A | G | A | G |
| 9818 | rs3655878   | 6 | 133684195 | A | G | G | A | G | A |
| 9819 | rs3670215   | 6 | 133742547 | A | C | C | A | C | A |
| 9820 | rs3664937   | 6 | 133765572 | C | G | G | C | G | C |
| 9821 | rs6339546   | 6 | 134019679 | A | G | G | A | G | G |
| 9822 | rs3665786   | 6 | 134069741 | G | A | A | G | A | G |
| 9823 | rs3655188   | 6 | 134153594 | G | G | G | A | G | G |
| 9824 | rs3721792   | 6 | 134232590 | G | A | A | A | A | A |
| 9825 | rs3678980   | 6 | 134521641 | G | A | A | G | A | G |
| 9826 | rs6334723   | 6 | 134753250 | G | G | G | A | G | G |
| 9827 | rs3671932   | 6 | 134909143 | C | C | C | G | C | C |
| 9828 | rs3700264   | 6 | 134926240 | A | A | A | G | A | G |
| 9829 | rs3699650   | 6 | 135135979 | C | C | C | A | C | C |
| 9830 | rs6215934   | 6 | 135786603 | A | A | A | G | A | A |
| 9831 | rs3693762   | 6 | 135850098 | G | G | G | A | G | G |
| 9832 | rs3711652   | 6 | 136037310 | A | A | A | G | A | A |
| 9833 | rs3657332   | 6 | 136038097 | A | A | A | C | A | A |
| 9834 | rs3704502   | 6 | 136317219 | G | G | G | A | G | G |
| 9835 | rs4226339   | 6 | 136461837 | G | G | G | A | G | G |
| 9836 | rs3673059   | 6 | 136491989 | A | A | A | G | A | G |
| 9837 | rs6340756   | 6 | 136674146 | A | A | A | A | A | A |
| 9838 | rs3687201   | 6 | 137063948 | G | G | G | A | G | G |
| 9839 | rs4137105   | 6 | 137063994 | A | A | A | A | A | A |

|      |             |   |           |   |   |      |   |   |   |
|------|-------------|---|-----------|---|---|------|---|---|---|
| 9840 | rs6317763   | 6 | 137465427 | G | G | G    | G | G | G |
| 9841 | rs3725987   | 6 | 137657411 | G | G | G    | A | G | G |
| 9842 | rs4226344   | 6 | 137848932 | T | A | A    | A | A | A |
| 9843 | rs8261311   | 6 | 138254620 | G | G | G    | G | G | A |
| 9844 | rs8261333   | 6 | 138261225 | A | A | A    | A | A | A |
| 9845 | rs3682699   | 6 | 138541364 | G | A | A    | G | A | G |
| 9846 | rs3675155   | 6 | 138637212 | A | C | NONE | A | C | A |
| 9847 | rs3712962   | 6 | 138670785 | G | A | A    | G | A | G |
| 9848 | rs6261913   | 6 | 138754751 | G | A | A    | G | A | G |
| 9849 | rs3658123   | 6 | 138953974 | A | G | G    | A | G | G |
| 9850 | rs3690783   | 6 | 139110749 | G | C | C    | C | C | C |
| 9851 | rs6255954   | 6 | 139167397 | A | G | G    | A | G | A |
| 9852 | rs6198929   | 6 | 139269336 | A | C | C    | A | C | A |
| 9853 | rs3715443   | 6 | 139563765 | A | G | G    | G | G | G |
| 9854 | rs6288584   | 6 | 139627353 | A | G | G    | A | G | G |
| 9855 | rs3679077   | 6 | 139637531 | G | A | A    | G | A | G |
| 9856 | rs3672808   | 6 | 139965472 | G | A | A    | G | A | A |
| 9857 | rs3664540   | 6 | 140232726 | A | A | A    | G | A | G |
| 9858 | rs3676517   | 6 | 140276377 | A | A | A    | C | A | A |
| 9859 | rs6335021   | 6 | 140415198 | A | A | A    | A | A | G |
| 9860 | rs4226345   | 6 | 140776739 | A | A | A    | A | A | A |
| 9861 | rs6396986   | 6 | 141296758 | G | G | G    | G | G | G |
| 9862 | rs8268650   | 6 | 141660661 | G | G | G    | G | G | A |
| 9863 | rs8262225   | 6 | 141661043 | G | G | G    | G | G | G |
| 9864 | rs8255572   | 6 | 141675921 | T | T | T    | T | T | T |
| 9865 | rs8262499   | 6 | 141694583 | G | G | G    | G | G | A |
| 9866 | rs8262468   | 6 | 141695864 | A | A | A    | A | A | G |
| 9867 | rs4226351   | 6 | 142734106 | A | A | A    | A | A | A |
| 9868 | rs6345000   | 6 | 143108355 | G | G | G    | G | G | G |
| 9869 | rs4226359   | 6 | 143447035 | C | C | C    | C | C | A |
| 9870 | rs6152631   | 6 | 144204769 | G | G | A    | G | A | G |
| 9871 | rs6272420   | 6 | 144223974 | A | A | C    | A | C | C |
| 9872 | rs3671022   | 6 | 144245274 | A | A | G    | G | G | A |
| 9873 | rs3705112   | 6 | 144266213 | C | C | G    | G | G | C |
| 9874 | rs6386657   | 6 | 144464865 | G | G | A    | G | A | G |
| 9875 | rs3658783   | 6 | 144465978 | G | G | G    | A | G | G |
| 9876 | rs3716907   | 6 | 144568344 | A | A | G    | A | G | A |
| 9877 | rs3705745   | 6 | 144833783 | A | A | G    | A | G | A |
| 9878 | rs3677570   | 6 | 144838062 | C | C | A    | C | A | C |
| 9879 | rs3694396   | 4 | 112812399 | A | A | G    | A | A | A |
| 9880 | mCV23060344 | 6 | 146411748 | C | C | G    | G | G | G |
| 9881 | rs4140069   | 6 | 145027219 | A | A | G    | A | G | A |
| 9882 | rs6195302   | 6 | 145124564 | A | A | G    | G | G | A |
| 9883 | rs3671011   | 6 | 145136382 | C | C | A    | A | A | C |
| 9884 | rs3721559   | 6 | 145343140 | A | A | G    | G | G | A |
| 9885 | rs4226363   | 6 | 145375378 | G | G | G    | G | G | G |
| 9886 | rs3089737   | 6 | 145624262 | G | G | G    | A | G | G |
| 9887 | rs6169153   | 6 | 145732310 | G | G | A    | G | A | G |
| 9888 | rs6387265   | 6 | 145879903 | G | G | G    | A | G | G |
| 9889 | rs6329917   | 6 | 145944662 | G | G | A    | G | A | G |
| 9890 | rs3721620   | 6 | 145951335 | A | A | T    | A | T | A |
| 9891 | rs3654777   | 6 | 145957856 | G | G | G    | A | G | G |
| 9892 | rs3023100   | 6 | 146208358 | C | C | A    | C | A | C |
| 9893 | rs3023105   | 6 | 146597312 | G | G | G    | A | G | G |
| 9894 | rs3090435   | 6 | 146754186 | A | A | A    | G | A | A |
| 9895 | rs4226371   | 6 | 146770974 | G | G | G    | A | G | G |
| 9896 | rs3725661   | 6 | 146788550 | G | G | G    | A | G | G |
| 9897 | rs3684551   | 6 | 146803819 | A | A | A    | G | A | A |
| 9898 | rs3712253   | 6 | 146863715 | G | G | G    | A | G | G |
| 9899 | rs4226375   | 6 | 147158309 | A | A | A    | A | A | A |
| 9900 | rs4226380   | 6 | 147158529 | G | G | G    | G | G | G |
| 9901 | rs6265387   | 6 | 147380171 | G | G | A    | A | A | G |
| 9902 | rs3686286   | 6 | 147668759 | A | A | G    | G | G | A |
| 9903 | rs3655959   | 6 | 147857079 | G | G | C    | C | C | C |
| 9904 | rs3695746   | 6 | 147858955 | A | A | G    | A | G | A |
| 9905 | rs6293645   | 6 | 148187893 | G | G | G    | G | G | G |
| 9906 | mCV23338838 | 6 | 149618644 | A | A | G    | G | G | G |
| 9907 | rs6281356   | 6 | 148403426 | A | A | A    | A | A | A |
| 9908 | rs3711088   | 6 | 148456534 | G | G | G    | C | G | C |
| 9909 | rs3677539   | 6 | 148742850 | A | A | G    | A | G | G |
| 9910 | rs3659280   | 6 | 148890307 | G | G | A    | G | A | G |
| 9911 | mCV23069133 | 6 | 147328303 | A | A | C    | C | C | A |
| 9912 | rs6392070   | 6 | 149072242 | G | G | G    | G | G | G |
| 9913 | rs3688686   | 7 | 2589779   | A | A | A    | G | A | G |

|      |             |   |           |   |   |   |   |      |   |
|------|-------------|---|-----------|---|---|---|---|------|---|
| 9914 | rs8259626   | 7 | 114261276 | C | G | C | C | C    | C |
| 9915 | rs8259625   | 7 | 114261271 | G | G | G | G | G    | G |
| 9916 | rs8259618   | 7 | 114259599 | A | G | A | A | A    | A |
| 9917 | rs3724540   | 7 | 94665666  | G | A | G | A | G    | A |
| 9918 | rs3658777   | 7 | 76791012  | A | A | A | G | A    | A |
| 9919 | rs3671943   | 7 | 90328805  | C | C | C | A | C    | C |
| 9920 | rs8269316   | 7 | 45411815  | G | A | G | A | G    | A |
| 9921 | rs3685570   | 7 | 106597989 | A | G | G | A | G    | A |
| 9922 | rs8269265   | 7 | 45392760  | G | A | G | A | G    | A |
| 9923 | rs3023159   | 7 | 106579694 | A | G | G | A | G    | A |
| 9924 | rs3696018   | 7 | 44701332  | C | C | C | A | C    | C |
| 9925 | rs3662508   | 7 | 16157466  | A | G | G | A | A    | G |
| 9926 | mCV24206490 | 7 | 128075    | G | A | G | A | G    | A |
| 9927 | rs3726290   | 7 | 100623211 | G | G | A | G | A    | G |
| 9928 | mCV24212075 | 7 | 10471645  | A | T | T | A | NONE | T |
| 9929 | rs4232318   | 7 | 3334313   | A | A | T | T | T    | A |
| 9930 | rs4232319   | 7 | 3334454   | A | A | A | A | A    | A |
| 9931 | rs6292076   | 7 | 31782869  | G | G | G | A | G    | G |
| 9932 | rs8252653   | 7 | 26778269  | A | A | A | A | A    | A |
| 9933 | rs8252588   | 7 | 26778359  | A | A | A | G | A    | A |
| 9934 | rs8252567   | 7 | 26780733  | A | A | A | C | A    | A |
| 9935 | rs4226385   | 7 | 14972886  | A | A | A | A | A    | A |
| 9936 | rs6376323   | 7 | 43847133  | G | G | G | G | G    | G |
| 9937 | rs3700068   | 7 | 38982521  | G | G | G | A | G    | G |
| 9938 | rs3714915   | 7 | 12206182  | C | C | C | A | C    | C |
| 9939 | rs3714976   | 7 | 12206215  | G | G | G | C | G    | G |
| 9940 | rs8269138   | 7 | 11684039  | G | G | G | G | G    | G |
| 9941 | rs8269404   | 7 | 11735279  | A | A | A | A | A    | A |
| 9942 | mCV23733213 | 7 | 5115174   | A | G | A | A | A    | A |
| 9943 | mCV23738426 | 7 | 4906617   | A | A | A | G | G    | G |
| 9944 | rs3659033   | 7 | 10565513  | G | G | G | A | G    | G |
| 9945 | rs6384973   | 7 | 12916620  | G | G | G | C | G    | G |
| 9946 | rs6377546   | 7 | 43266814  | G | G | G | G | G    | G |
| 9947 | rs6369575   | 7 | 20865015  | G | G | G | G | G    | G |
| 9948 | rs3701600   | 7 | 25329604  | A | A | G | G | G    | G |
| 9949 | rs3659551   | 7 | 25331884  | A | A | G | G | G    | G |
| 9950 | mCV23738042 | 7 | 4919303   | T | T | A | A | A    | A |
| 9951 | mCV23044771 | 7 | 8573197   | C | C | C | C | C    | C |
| 9952 | rs6316571   | 7 | 5715334   | A | A | A | A | A    | A |
| 9953 | rs3658362   | 7 | 37176366  | C | C | C | A | C    | C |
| 9954 | rs6261745   | 7 | 42789176  | G | G | G | G | G    | G |
| 9955 | rs4226402   | 7 | 43063853  | A | A | A | A | A    | A |
| 9956 | rs6262171   | 7 | 24049333  | G | G | G | G | G    | G |
| 9957 | mCV22975338 | 7 | 7874146   | A | A | A | C | A    | A |
| 9958 | rs6377837   | 7 | 7208796   | C | C | C | C | C    | C |
| 9959 | rs6330715   | 7 | 7580376   | C | C | C | A | C    | C |
| 9960 | rs3675839   | 7 | 7713719   | A | A | A | G | A    | G |
| 9961 | rs3724197   | 7 | 7950972   | A | G | A | G | A    | A |
| 9962 | rs3711159   | 7 | 7979467   | A | G | A | G | A    | G |
| 9963 | rs3711200   | 7 | 7979500   | C | A | C | A | C    | A |
| 9964 | rs6295100   | 7 | 8141383   | G | C | G | C | G    | C |
| 9965 | rs3724594   | 7 | 8251928   | G | A | G | A | G    | A |
| 9966 | rs3709711   | 7 | 8286687   | C | A | C | A | C    | A |
| 9967 | rs4226418   | 7 | 13709013  | C | C | C | C | A    | C |
| 9968 | rs6365609   | 7 | 8618040   | G | A | G | A | A    | A |
| 9969 | rs6361247   | 7 | 9296488   | C | A | C | A | C    | A |
| 9970 | rs3705671   | 7 | 9631451   | A | G | A | G | G    | G |
| 9971 | rs3658600   | 7 | 9747120   | G | A | G | A | A    | A |
| 9972 | rs6309378   | 7 | 10517932  | T | A | T | A | A    | A |
| 9973 | rs3689218   | 7 | 10546409  | G | A | G | G | A    | A |
| 9974 | rs3726684   | 7 | 10554470  | G | G | G | A | G    | G |
| 9975 | rs8253990   | 7 | 10610894  | C | C | C | C | C    | C |
| 9976 | rs8254016   | 7 | 10614066  | A | A | A | A | A    | A |
| 9977 | rs8254031   | 7 | 10615404  | A | A | A | A | A    | A |
| 9978 | rs8254032   | 7 | 10615533  | A | G | A | G | G    | G |
| 9979 | mCV25415374 | 7 | 13168023  | A | G | A | G | G    | G |
| 9980 | rs3672220   | 7 | 10731932  | G | A | G | G | A    | G |
| 9981 | rs6162720   | 7 | 10883183  | G | G | G | C | C    | C |
| 9982 | rs4226441   | 7 | 43133188  | A | G | A | G | G    | G |
| 9983 | rs8252878   | 7 | 41145059  | G | A | G | A | A    | A |
| 9984 | rs3680778   | 7 | 7778948   | G | A | G | A | A    | A |
| 9985 | rs6188308   | 7 | 8134358   | C | C | C | C | C    | C |
| 9986 | rs6201966   | 7 | 8134650   | C | A | C | A | A    | A |
| 9987 | rs3724657   | 7 | 42376007  | G | A | G | A | A    | A |

|       |             |   |          |   |      |   |   |      |   |
|-------|-------------|---|----------|---|------|---|---|------|---|
| 9988  | rs3713852   | 7 | 42378081 | A | G    | A | G | G    | G |
| 9989  | mCV25413535 | 7 | 14294911 | G | A    | A | A | A    | A |
| 9990  | rs3692711   | 7 | 8431933  | C | C    | C | A | C    | A |
| 9991  | mCV22517300 | 7 | 15336482 | A | C    | A | A | A    | A |
| 9992  | mCV23045369 | 7 | 16001150 | G | A    | A | A | G    | A |
| 9993  | rs6364065   | 7 | 24450985 | G | A    | G | A | A    | A |
| 9994  | rs3697089   | 7 | 5489001  | A | G    | A | G | G    | G |
| 9995  | rs3724397   | 7 | 12934995 | G | A    | G | A | A    | A |
| 9996  | rs4226453   | 7 | 12878775 | C | A    | C | A | A    | A |
| 9997  | mCV25406219 | 7 | 16848232 | G | A    | A | A | A    | A |
| 9998  | rs3708913   | 7 | 13894574 | A | C    | C | C | C    | C |
| 9999  | rs8258834   | 7 | 19867051 | G | G    | G | G | G    | G |
| 10000 | rs8236562   | 7 | 14623274 | G | G    | G | G | G    | G |
| 10001 | rs8257222   | 7 | 14620068 | T | A    | A | A | A    | A |
| 10002 | rs6209066   | 7 | 14558752 | G | G    | G | G | G    | G |
| 10003 | rs3671222   | 7 | 14641958 | G | A    | A | A | NONE | A |
| 10004 | rs8236590   | 7 | 14636260 | A | A    | A | A | A    | A |
| 10005 | rs8236380   | 7 | 14484936 | G | G    | G | G | G    | G |
| 10006 | mCV25220583 | 7 | 17994561 | A | A    | A | G | G    | A |
| 10007 | rs8265514   | 7 | 15674000 | C | C    | C | C | C    | C |
| 10008 | rs8236604   | 7 | 15683935 | G | G    | G | G | G    | G |
| 10009 | rs8265547   | 7 | 15683992 | A | A    | A | A | A    | A |
| 10010 | rs8265554   | 7 | 15687800 | G | G    | G | G | G    | G |
| 10011 | rs6171548   | 7 | 16642471 | G | G    | G | G | G    | G |
| 10012 | rs6164551   | 7 | 17546872 | G | G    | G | G | G    | G |
| 10013 | rs4226499   | 7 | 17800749 | G | G    | A | G | G    | G |
| 10014 | rs6288041   | 7 | 17718981 | G | A    | A | A | A    | G |
| 10015 | rs3712359   | 7 | 17855508 | G | G    | C | G | G    | G |
| 10016 | rs4226514   | 7 | 18196287 | A | A    | A | A | A    | A |
| 10017 | rs4226520   | 7 | 18758740 | A | A    | A | G | A    | G |
| 10018 | rs3688693   | 7 | 18305753 | G | A    | A | A | A    | A |
| 10019 | rs6208019   | 7 | 18884852 | G | A    | G | G | A    | G |
| 10020 | rs8261820   | 7 | 19399656 | A | G    | A | A | G    | A |
| 10021 | rs3718762   | 7 | 19401297 | G | A    | G | G | A    | G |
| 10022 | rs6388890   | 7 | 19436754 | G | G    | A | A | G    | A |
| 10023 | rs3147878   | 7 | 19483951 | G | G    | A | A | G    | A |
| 10024 | rs3147860   | 7 | 19496283 | C | A    | A | A | A    | A |
| 10025 | rs8251849   | 7 | 19694692 | C | C    | C | C | G    | C |
| 10026 | rs3662961   | 7 | 19697390 | A | A    | G | G | A    | G |
| 10027 | rs8236618   | 7 | 19698519 | A | A    | A | A | C    | A |
| 10028 | mCV23114039 | 7 | 24694450 | G | G    | A | G | A    | G |
| 10029 | rs8240950   | 7 | 19856201 | A | A    | A | A | G    | A |
| 10030 | rs8240966   | 7 | 19854223 | T | T    | T | T | A    | T |
| 10031 | rs8240976   | 7 | 19843026 | G | G    | G | G | A    | G |
| 10032 | rs6241757   | 7 | 20033189 | G | G    | G | G | G    | G |
| 10033 | rs3725610   | 7 | 20070708 | A | G    | G | G | NONE | G |
| 10034 | mCV25384765 | 7 | 19820991 | A | T    | T | T | T    | T |
| 10035 | mCV23212922 | 7 | 26160748 | T | T    | T | T | A    | T |
| 10036 | mCV23088150 | 7 | 23070928 | A | A    | C | C | C    | A |
| 10037 | rs6363390   | 7 | 21890869 | G | G    | A | A | G    | A |
| 10038 | rs6389011   | 7 | 14122794 | G | G    | A | G | G    | G |
| 10039 | rs3719311   | 7 | 22647606 | A | A    | T | T | T    | T |
| 10040 | rs6248554   | 7 | 22937979 | G | G    | G | G | G    | G |
| 10041 | rs3023117   | 7 | 22966455 | G | A    | A | A | A    | G |
| 10042 | rs3722149   | 7 | 23171241 | C | A    | C | C | C    | C |
| 10043 | rs3694031   | 7 | 23329413 | G | A    | A | A | G    | A |
| 10044 | rs4226535   | 7 | 23818358 | G | G    | A | G | G    | G |
| 10045 | rs4226545   | 7 | 23818922 | G | G    | G | G | G    | G |
| 10046 | rs3091038   | 7 | 23460710 | G | G    | G | G | G    | G |
| 10047 | rs3699705   | 7 | 23486681 | G | A    | A | A | A    | A |
| 10048 | rs6293181   | 7 | 23658370 | G | NONE | G | G | G    | G |
| 10049 | rs3663763   | 7 | 23954426 | A | T    | A | A | A    | A |
| 10050 | rs4226547   | 7 | 24197894 | G | A    | G | G | G    | G |
| 10051 | rs6257814   | 7 | 24457426 | G | A    | G | G | A    | G |
| 10052 | mCV23663629 | 7 | 26432125 | A | A    | A | C | C    | A |
| 10053 | rs4136084   | 7 | 24771509 | G | A    | A | G | A    | A |
| 10054 | rs6217275   | 7 | 24859883 | C | C    | C | G | G    | C |
| 10055 | rs3724638   | 7 | 24907837 | G | G    | G | A | A    | G |
| 10056 | rs3720735   | 7 | 25217824 | G | G    | G | A | G    | G |
| 10057 | rs6300275   | 7 | 25290406 | A | A    | A | G | NONE | A |
| 10058 | rs3666900   | 7 | 25588748 | A | A    | A | G | G    | A |
| 10059 | rs3665855   | 7 | 25731783 | G | G    | G | A | A    | G |
| 10060 | rs3716814   | 7 | 25851129 | G | G    | G | A | A    | G |
| 10061 | rs6176786   | 7 | 25920266 | G | G    | G | G | G    | G |



|       |             |   |          |   |   |   |   |      |   |
|-------|-------------|---|----------|---|---|---|---|------|---|
| 10062 | mCV23658052 | 7 | 27361308 | C | C | C | A | A    | C |
| 10063 | rs6230901   | 7 | 26715575 | A | A | A | G | G    | A |
| 10064 | mCV25420884 | 7 | 27578282 | G | G | G | A | A    | G |
| 10065 | rs3663724   | 7 | 27093819 | G | G | G | A | A    | G |
| 10066 | rs3658393   | 7 | 27171690 | G | G | G | A | A    | G |
| 10067 | rs3670807   | 7 | 27871533 | A | C | A | C | NONE | A |
| 10068 | rs3675080   | 7 | 27770401 | A | G | A | G | G    | G |
| 10069 | rs3668040   | 7 | 27737655 | G | A | G | A | G    | A |
| 10070 | rs3676967   | 7 | 28061226 | G | A | G | G | A    | A |
| 10071 | mCV23516314 | 7 | 33348088 | G | G | G | G | A    | G |
| 10072 | rs6381706   | 7 | 28315909 | A | G | A | A | G    | G |
| 10073 | rs6355384   | 7 | 28828489 | A | A | A | A | T    | A |
| 10074 | rs4232449   | 7 | 28755779 | A | A | A | A | G    | A |
| 10075 | rs4226555   | 7 | 29081555 | A | A | A | A | A    | A |
| 10076 | rs6226457   | 7 | 29974905 | G | G | G | G | A    | G |
| 10077 | rs4226558   | 7 | 30453904 | G | G | G | G | G    | G |
| 10078 | rs6316536   | 7 | 30898583 | A | A | A | A | G    | A |
| 10079 | rs8271756   | 7 | 31209052 | G | G | G | G | A    | G |
| 10080 | rs8271753   | 7 | 31207812 | G | G | G | G | A    | G |
| 10081 | rs8271728   | 7 | 31205367 | G | G | G | G | A    | G |
| 10082 | rs3682321   | 7 | 31203269 | G | A | G | G | G    | G |
| 10083 | mCV25286555 | 7 | 31890677 | A | C | A | C | C    | A |
| 10084 | mCV25286826 | 7 | 31891068 | A | G | A | G | G    | A |
| 10085 | mCV25287219 | 7 | 31891905 | G | A | G | A | G    | G |
| 10086 | mCV25287231 | 7 | 31893534 | G | A | G | A | G    | G |
| 10087 | mCV25287232 | 7 | 31894305 | A | G | A | G | A    | A |
| 10088 | mCV25287243 | 7 | 31894493 | G | A | G | A | G    | G |
| 10089 | mCV25287244 | 7 | 31894499 | A | G | A | G | G    | A |
| 10090 | mCV25287517 | 7 | 31895154 | A | A | A | A | G    | A |
| 10091 | mCV25287527 | 7 | 31895269 | G | A | A | A | G    | G |
| 10092 | mCV25287528 | 7 | 31895354 | A | G | A | G | G    | A |
| 10093 | mCV25287529 | 7 | 31895424 | A | G | A | G | G    | A |
| 10094 | mCV25287539 | 7 | 31895752 | G | A | G | A | G    | G |
| 10095 | mCV25287540 | 7 | 31895772 | A | A | A | A | G    | A |
| 10096 | mCV25287541 | 7 | 31895797 | G | G | G | G | A    | G |
| 10097 | mCV25287551 | 7 | 31895932 | C | C | C | C | G    | C |
| 10098 | mCV25287552 | 7 | 31895953 | A | G | A | G | G    | A |
| 10099 | mCV25287553 | 7 | 31896092 | G | G | G | G | A    | G |
| 10100 | mCV25287563 | 7 | 31896125 | A | G | A | G | G    | A |
| 10101 | mCV25287564 | 7 | 31896161 | G | A | A | A | G    | G |
| 10102 | rs4226572   | 7 | 31698029 | A | C | A | A | A    | A |
| 10103 | rs6201929   | 7 | 31937382 | G | A | G | A | G    | G |
| 10104 | rs3719256   | 7 | 31933809 | G | A | G | A | G    | G |
| 10105 | rs3689879   | 7 | 31923072 | A | G | A | G | NONE | A |
| 10106 | rs8260952   | 7 | 31986114 | A | A | A | A | G    | A |
| 10107 | rs4226575   | 7 | 32223846 | A | A | A | A | A    | A |
| 10108 | rs6228386   | 7 | 32285087 | C | C | C | A | C    | A |
| 10109 | rs6313526   | 7 | 32302462 | G | G | G | A | G    | A |
| 10110 | rs3689409   | 7 | 32401134 | A | A | A | G | A    | G |
| 10111 | rs8269037   | 7 | 32805221 | A | A | A | A | A    | A |
| 10112 | rs8269035   | 7 | 32805005 | G | G | G | G | G    | G |
| 10113 | rs8269023   | 7 | 32801804 | A | A | A | A | A    | A |
| 10114 | rs3721550   | 7 | 33484199 | G | A | G | A | G    | A |
| 10115 | rs3703247   | 7 | 33404727 | G | G | G | A | G    | A |
| 10116 | rs3722844   | 7 | 33353344 | C | C | C | A | C    | A |
| 10117 | rs8255275   | 7 | 33574760 | A | A | A | G | A    | G |
| 10118 | rs6296138   | 7 | 33671479 | T | T | T | A | T    | A |
| 10119 | rs8260975   | 7 | 33835314 | C | A | C | A | C    | A |
| 10120 | rs8260982   | 7 | 33836281 | G | G | G | G | G    | G |
| 10121 | rs3659049   | 7 | 33842276 | G | A | G | A | G    | A |
| 10122 | rs6200877   | 7 | 33995268 | G | G | G | G | G    | G |
| 10123 | rs3024224   | 7 | 34137225 | A | A | A | A | A    | A |
| 10124 | rs3023119   | 7 | 34159147 | A | A | A | A | A    | A |
| 10125 | rs8266426   | 7 | 34160446 | A | A | A | A | A    | A |
| 10126 | rs6324063   | 7 | 34578745 | G | G | G | G | G    | G |
| 10127 | mCV24991351 | 7 | 35506119 | C | C | C | C | NONE | G |
| 10128 | rs6226757   | 7 | 36239627 | G | G | G | G | A    | G |
| 10129 | rs3023125   | 7 | 36795665 | A | A | A | A | A    | A |
| 10130 | rs3680765   | 7 | 36839834 | C | A | C | A | C    | A |
| 10131 | rs3673884   | 7 | 36912381 | A | G | A | G | A    | A |
| 10132 | rs6222964   | 7 | 36970470 | G | A | G | A | G    | G |
| 10133 | rs3679637   | 7 | 37013786 | G | A | G | A | G    | G |
| 10134 | rs4226605   | 7 | 37074347 | G | G | G | G | G    | G |
| 10135 | rs4226609   | 7 | 37074460 | A | A | A | A | A    | A |

|       |             |   |          |   |   |   |   |   |   |
|-------|-------------|---|----------|---|---|---|---|---|---|
| 10136 | rs3676147   | 7 | 37235801 | G | A | G | A | G | A |
| 10137 | rs3692261   | 7 | 37285251 | A | G | A | G | A | G |
| 10138 | rs3687031   | 7 | 37354238 | G | G | G | A | G | A |
| 10139 | rs6371491   | 7 | 37474244 | G | G | G | G | G | G |
| 10140 | rs6158386   | 7 | 37488740 | G | G | G | G | G | G |
| 10141 | rs3090660   | 7 | 37795990 | C | C | C | A | C | C |
| 10142 | rs6273712   | 7 | 38022969 | A | A | A | A | A | A |
| 10143 | rs3699938   | 7 | 38476481 | G | A | G | G | G | A |
| 10144 | rs6222568   | 7 | 38661925 | G | G | G | A | G | G |
| 10145 | rs3725186   | 7 | 38807273 | A | A | A | G | A | A |
| 10146 | rs3703728   | 7 | 38867055 | A | A | A | T | A | A |
| 10147 | rs3720603   | 7 | 38867495 | A | A | A | G | A | A |
| 10148 | rs6221808   | 7 | 39051518 | G | G | G | G | G | G |
| 10149 | rs6233515   | 7 | 39124686 | G | G | G | G | G | G |
| 10150 | rs8266533   | 7 | 39319866 | A | A | A | A | A | A |
| 10151 | rs8266566   | 7 | 39383361 | T | T | T | T | T | T |
| 10152 | rs8266585   | 7 | 39401066 | A | A | A | A | A | A |
| 10153 | rs3089213   | 7 | 39556820 | G | G | G | G | G | G |
| 10154 | rs6200784   | 7 | 39727826 | A | A | A | A | A | A |
| 10155 | rs3663846   | 7 | 39891494 | A | A | A | G | A | A |
| 10156 | rs3672699   | 7 | 40657260 | G | A | G | G | G | A |
| 10157 | rs3718641   | 7 | 41170581 | G | A | G | A | G | A |
| 10158 | rs6178483   | 7 | 41300381 | C | C | C | C | C | C |
| 10159 | rs3688876   | 7 | 41376403 | A | A | A | C | A | A |
| 10160 | rs3713297   | 7 | 47634249 | A | C | A | C | A | C |
| 10161 | rs3688386   | 7 | 42673653 | A | G | A | G | A | G |
| 10162 | rs6209038   | 7 | 42765839 | G | G | G | G | G | G |
| 10163 | rs6260795   | 7 | 42835290 | C | C | C | C | C | C |
| 10164 | rs3688093   | 7 | 42836704 | T | A | T | A | T | A |
| 10165 | rs4137599   | 7 | 43005593 | G | G | A | A | G | G |
| 10166 | rs3717293   | 7 | 43537055 | A | A | A | A | G | A |
| 10167 | rs6404048   | 7 | 43504831 | A | A | A | A | A | A |
| 10168 | rs3663313   | 7 | 43718739 | C | C | C | G | G | C |
| 10169 | rs6326195   | 7 | 44368276 | G | G | G | G | G | G |
| 10170 | rs4136662   | 7 | 44384942 | G | G | G | G | G | G |
| 10171 | rs3657400   | 7 | 44453486 | A | A | A | A | G | A |
| 10172 | rs8260772   | 7 | 50196588 | G | G | G | G | G | G |
| 10173 | rs3668134   | 7 | 44972563 | A | A | A | A | A | A |
| 10174 | rs6323139   | 7 | 44930293 | G | A | G | A | A | A |
| 10175 | rs8260829   | 7 | 44920691 | G | G | G | G | G | G |
| 10176 | rs8260943   | 7 | 45323239 | A | A | A | A | A | A |
| 10177 | rs8260944   | 7 | 45323186 | G | G | G | G | G | G |
| 10178 | rs3693038   | 7 | 45306964 | A | C | A | C | A | C |
| 10179 | rs3023132   | 7 | 45240565 | C | C | C | C | A | C |
| 10180 | rs8269185   | 7 | 45191436 | A | A | A | A | A | A |
| 10181 | rs6312804   | 7 | 45090611 | A | A | A | A | A | A |
| 10182 | rs8260906   | 7 | 45332817 | G | G | G | G | G | G |
| 10183 | rs3090914   | 7 | 45962289 | A | A | A | A | A | A |
| 10184 | rs6410460   | 7 | 45968201 | A | A | A | A | A | A |
| 10185 | rs3705089   | 7 | 46323059 | C | G | C | G | C | G |
| 10186 | rs3664823   | 7 | 46418664 | A | G | A | G | G | G |
| 10187 | mCV23672419 | 7 | 45173762 | A | C | A | A | A | C |
| 10188 | rs6217158   | 7 | 46552979 | C | C | C | C | C | C |
| 10189 | rs3715948   | 7 | 47451904 | A | A | A | A | A | A |
| 10190 | rs6361518   | 7 | 47891718 | C | C | C | C | A | C |
| 10191 | rs3672223   | 7 | 47999587 | A | G | A | G | A | G |
| 10192 | rs6301305   | 7 | 48038664 | A | A | A | A | T | A |
| 10193 | mCV23423763 | 7 | 47949709 | C | A | C | A | C | A |
| 10194 | rs3697532   | 7 | 48569362 | A | A | A | A | A | A |
| 10195 | rs6204175   | 7 | 48906853 | G | G | G | G | A | G |
| 10196 | rs3723625   | 7 | 49769236 | A | A | A | A | G | A |
| 10197 | rs6166250   | 7 | 50295092 | A | A | A | A | G | A |
| 10198 | mCV24979486 | 7 | 56117427 | T | T | T | T | A | T |
| 10199 | rs6345670   | 7 | 50681480 | A | A | A | A | G | A |
| 10200 | rs3679779   | 7 | 51392430 | G | A | G | A | A | A |
| 10201 | rs3719301   | 7 | 51394274 | C | A | C | A | C | A |
| 10202 | rs3717935   | 7 | 51547846 | G | G | G | A | G | G |
| 10203 | rs3717846   | 7 | 51547793 | C | C | C | A | C | C |
| 10204 | rs3714908   | 7 | 51544526 | A | A | A | G | G | A |
| 10205 | rs3726993   | 7 | 51700275 | G | G | G | A | G | G |
| 10206 | rs4226632   | 7 | 51787025 | G | G | G | G | G | G |
| 10207 | mCV23752700 | 7 | 49919613 | G | G | G | G | A | G |
| 10208 | rs6336159   | 7 | 52270784 | G | G | G | G | G | G |
| 10209 | rs4226649   | 7 | 53081232 | A | A | A | A | G | A |

|       |             |   |          |   |   |   |   |   |   |
|-------|-------------|---|----------|---|---|---|---|---|---|
| 10210 | rs4226655   | 7 | 53120682 | A | A | A | A | G | A |
| 10211 | rs3088794   | 7 | 53227218 | A | A | A | G | G | A |
| 10212 | rs3667815   | 7 | 53257383 | A | A | A | G | G | A |
| 10213 | rs6160140   | 7 | 53312532 | A | A | A | G | A | G |
| 10214 | rs3090723   | 7 | 53541409 | C | C | C | C | C | C |
| 10215 | rs3713031   | 7 | 59065999 | A | A | A | G | G | G |
| 10216 | rs4226680   | 7 | 53745747 | A | A | A | A | A | A |
| 10217 | rs3706446   | 7 | 54666576 | G | G | G | A | A | G |
| 10218 | rs3667441   | 7 | 54664806 | G | G | G | A | A | G |
| 10219 | rs3675028   | 7 | 54549581 | G | G | G | A | A | G |
| 10220 | rs6287797   | 7 | 54500474 | G | G | G | A | A | G |
| 10221 | rs3698065   | 7 | 55148835 | A | A | A | G | A | A |
| 10222 | rs6193753   | 7 | 55192242 | G | G | G | G | G | G |
| 10223 | rs3023145   | 7 | 55565910 | C | C | C | C | A | A |
| 10224 | rs3705155   | 7 | 55557090 | A | A | A | C | C | C |
| 10225 | rs3667208   | 7 | 55522049 | G | G | G | A | A | G |
| 10226 | rs8239069   | 7 | 55772977 | A | A | A | A | A | A |
| 10227 | rs6266745   | 7 | 55890385 | A | A | A | A | A | A |
| 10228 | rs3707769   | 7 | 55944997 | G | G | A | A | G | G |
| 10229 | rs3706258   | 7 | 56190774 | A | A | A | T | T | T |
| 10230 | rs3695904   | 7 | 56434818 | G | G | G | A | G | G |
| 10231 | mCV23318496 | 7 | 55001384 | T | T | T | T | T | T |
| 10232 | rs3657147   | 7 | 57152088 | G | G | G | A | A | A |
| 10233 | rs3723790   | 7 | 57204266 | G | G | G | A | G | G |
| 10234 | rs6167203   | 7 | 57205349 | A | A | A | A | A | A |
| 10235 | rs3683475   | 7 | 57615070 | A | A | A | G | A | A |
| 10236 | rs3710183   | 7 | 57749690 | A | A | A | G | A | A |
| 10237 | rs3707330   | 7 | 57739844 | G | G | G | A | G | G |
| 10238 | rs6224381   | 7 | 58264944 | A | A | A | A | A | A |
| 10239 | rs3661581   | 7 | 58409321 | G | G | A | A | A | G |
| 10240 | rs3088592   | 7 | 58628840 | A | A | A | A | A | A |
| 10241 | rs3660824   | 7 | 58609412 | A | A | A | G | G | G |
| 10242 | rs3691291   | 7 | 58916534 | G | G | G | A | A | G |
| 10243 | rs3691975   | 7 | 58916652 | G | G | G | A | A | G |
| 10244 | rs6327571   | 7 | 59006294 | A | A | A | G | G | G |
| 10245 | mCV23006400 | 7 | 57525735 | A | A | A | G | G | G |
| 10246 | rs6236572   | 7 | 59624234 | G | G | G | G | G | G |
| 10247 | rs3676254   | 7 | 59722158 | A | A | A | G | A | A |
| 10248 | rs3686406   | 7 | 59735970 | T | T | T | A | T | T |
| 10249 | rs3668546   | 7 | 59744844 | G | G | G | A | G | G |
| 10250 | rs4226685   | 7 | 60351780 | A | A | A | A | A | G |
| 10251 | rs6405925   | 7 | 60564586 | A | A | A | A | A | A |
| 10252 | rs3716002   | 7 | 61171781 | A | A | A | G | G | G |
| 10253 | mCV25443682 | 7 | 59448296 | G | G | G | G | A | G |
| 10254 | rs8268371   | 7 | 61353940 | G | C | G | C | G | C |
| 10255 | rs8268494   | 7 | 61400766 | A | T | A | T | A | A |
| 10256 | rs8268322   | 7 | 61408291 | A | A | A | C | A | A |
| 10257 | rs3677657   | 7 | 61680107 | A | G | A | G | A | A |
| 10258 | rs3687109   | 7 | 61862304 | T | A | T | A | T | T |
| 10259 | rs6337903   | 7 | 62344833 | G | G | G | G | G | G |
| 10260 | rs3718836   | 7 | 62508432 | A | A | A | G | A | G |
| 10261 | mCV25303361 | 7 | 60653332 | A | A | A | C | C | C |
| 10262 | rs6224142   | 7 | 62625901 | A | A | A | A | A | A |
| 10263 | rs3684797   | 7 | 62813289 | A | G | A | G | A | G |
| 10264 | rs3671471   | 7 | 63497493 | T | T | T | A | T | T |
| 10265 | rs6371577   | 7 | 63837740 | G | G | G | G | G | G |
| 10266 | rs6251120   | 7 | 64691089 | A | A | A | A | A | A |
| 10267 | rs3720746   | 7 | 65283918 | A | C | A | C | A | C |
| 10268 | rs6394640   | 7 | 65357595 | G | G | G | G | G | G |
| 10269 | rs6297524   | 7 | 66135318 | A | A | A | A | A | A |
| 10270 | rs8247788   | 7 | 66215986 | G | G | G | A | G | G |
| 10271 | rs8247796   | 7 | 66215809 | A | A | A | A | A | A |
| 10272 | rs8247827   | 7 | 66208872 | C | C | C | C | C | C |
| 10273 | rs8247824   | 7 | 66208579 | G | G | G | A | G | G |
| 10274 | rs8279749   | 7 | 66906419 | A | A | A | A | A | A |
| 10275 | rs4226715   | 7 | 67346534 | A | A | A | G | A | A |
| 10276 | rs6209569   | 7 | 67191920 | A | A | A | A | A | A |
| 10277 | rs4226716   | 7 | 72742235 | G | G | G | G | G | G |
| 10278 | rs4226722   | 7 | 72763296 | A | C | A | C | A | C |
| 10279 | rs8236681   | 7 | 67465555 | G | G | G | G | G | G |
| 10280 | rs8250183   | 7 | 67465864 | G | G | G | G | G | G |
| 10281 | rs8248617   | 7 | 67468317 | A | G | A | A | A | G |
| 10282 | rs8248576   | 7 | 67546520 | C | C | C | A | C | C |
| 10283 | rs8248449   | 7 | 67583104 | G | G | G | G | G | G |

|       |             |   |          |   |   |   |   |     |   |
|-------|-------------|---|----------|---|---|---|---|-----|---|
| 10284 | rs8248433   | 7 | 67585590 | G | A | G | G | G   | A |
| 10285 | rs3700384   | 7 | 67715592 | A | G | A | G | A   | G |
| 10286 | rs3663343   | 7 | 68631303 | G | G | A | A | G   | G |
| 10287 | rs4139879   | 7 | 68687219 | A | A | A | T | A   | A |
| 10288 | rs3660529   | 7 | 69074604 | G | G | G | A | G   | G |
| 10289 | rs3718695   | 7 | 69074357 | A | A | A | G | A   | A |
| 10290 | rs4226744   | 7 | 69059985 | G | G | G | G | G   | G |
| 10291 | rs6360431   | 7 | 69166832 | A | A | A | G | A   | A |
| 10292 | mCV23906089 | 7 | 67307193 | G | A | A | A | G   | A |
| 10293 | mCV23906088 | 7 | 67307750 | A | A | A | G | A   | A |
| 10294 | mCV23906087 | 7 | 67309012 | A | C | A | C | A   | C |
| 10295 | mCV23906080 | 7 | 67309511 | A | G | A | G | A   | G |
| 10296 | mCV23906079 | 7 | 74630576 | G | C | G | C | G   | C |
| 10297 | mCV23906071 | 7 | 67310756 | A | G | A | G | A   | G |
| 10298 | mCV23906070 | 7 | 67311154 | C | C | C | C | C   | C |
| 10299 | mCV23906062 | 7 | 67311645 | C | A | C | A | C   | A |
| 10300 | mCV23906061 | 7 | 67311825 | G | A | G | G | G   | A |
| 10301 | mCV23906060 | 7 | 67312113 | A | G | A | A | A   | G |
| 10302 | mCV23906049 | 7 | 67312740 | A | G | A | G | A   | G |
| 10303 | rs3684222   | 7 | 69621504 | A | A | A | G | A/G | A |
| 10304 | rs3690268   | 7 | 69625363 | A | A | A | G | A   | A |
| 10305 | mCV25289592 | 7 | 67863784 | A | G | A | A | A   | G |
| 10306 | rs3688593   | 7 | 70183689 | G | G | G | C | G   | G |
| 10307 | rs6285160   | 7 | 70258168 | A | A | A | A | A   | A |
| 10308 | rs3686742   | 7 | 70288715 | A | G | A | G | A   | G |
| 10309 | rs3090916   | 7 | 70433880 | A | A | A | A | A   | A |
| 10310 | rs3712640   | 7 | 70508689 | G | A | G | G | G   | A |
| 10311 | rs6317673   | 7 | 70922273 | A | A | A | A | A   | A |
| 10312 | rs3663050   | 7 | 71419890 | A | C | A | C | A   | C |
| 10313 | rs3664330   | 7 | 71420141 | A | G | A | G | A   | G |
| 10314 | rs4226752   | 7 | 71715908 | A | A | A | A | A   | A |
| 10315 | rs3656832   | 7 | 72176553 | A | A | A | T | A   | A |
| 10316 | rs6327115   | 7 | 72178197 | C | C | C | A | C   | C |
| 10317 | rs6272937   | 7 | 72466085 | A | A | A | A | A   | A |
| 10318 | rs3696768   | 7 | 72703334 | G | A | A | A | G   | A |
| 10319 | rs3672290   | 7 | 73483259 | C | G | C | G | C   | G |
| 10320 | rs6391093   | 7 | 73788835 | A | A | A | A | A   | A |
| 10321 | rs3664145   | 7 | 73737208 | T | A | T | A | T   | A |
| 10322 | rs6394492   | 7 | 74390340 | C | C | C | A | C   | C |
| 10323 | rs4226759   | 7 | 74555364 | A | A | A | A | A   | A |
| 10324 | rs6277853   | 7 | 75060063 | G | G | G | G | G   | G |
| 10325 | rs3663323   | 7 | 75481063 | C | C | C | G | C   | C |
| 10326 | mCV23442976 | 7 | 73239811 | A | G | A | A | A   | G |
| 10327 | rs6276442   | 7 | 75757289 | A | A | A | A | A   | A |
| 10328 | rs3671486   | 7 | 76142320 | T | A | T | A | T   | A |
| 10329 | rs3654681   | 7 | 76327531 | C | A | C | A | C   | A |
| 10330 | mCV22985833 | 7 | 74279063 | A | C | A | C | A   | C |
| 10331 | rs3711806   | 7 | 76616362 | A | A | A | G | A   | A |
| 10332 | mCV23669669 | 7 | 74768852 | A | C | A | A | A   | C |
| 10333 | rs6216414   | 7 | 76990382 | A | A | A | A | A   | A |
| 10334 | rs3676511   | 7 | 77017488 | G | G | A | A | G   | G |
| 10335 | rs4226768   | 7 | 77680859 | A | A | A | A | A   | A |
| 10336 | rs3715742   | 7 | 77450062 | A | G | G | A | G   | G |
| 10337 | rs3089116   | 7 | 77985485 | G | A | A | A | A   | A |
| 10338 | rs6212025   | 7 | 78027228 | A | A | A | A | A   | A |
| 10339 | rs3088819   | 7 | 78387137 | A | A | A | A | A   | A |
| 10340 | rs6353096   | 7 | 78659108 | G | G | G | G | G   | G |
| 10341 | rs3663374   | 7 | 78686554 | T | T | T | A | T   | T |
| 10342 | rs3670309   | 7 | 78761356 | C | C | A | C | C   | C |
| 10343 | rs3703127   | 7 | 79213917 | G | A | A | A | A   | A |
| 10344 | rs3672893   | 7 | 79408640 | G | G | A | A | G   | G |
| 10345 | rs3680261   | 7 | 83452910 | G | G | G | G | A   | G |
| 10346 | rs6297335   | 7 | 79592928 | A | A | A | A | A   | A |
| 10347 | rs4139557   | 7 | 79642492 | A | G | G | A | G   | G |
| 10348 | rs6346458   | 7 | 79836880 | A | A | A | A | A   | A |
| 10349 | rs4226772   | 7 | 79964718 | G | G | G | G | G   | G |
| 10350 | rs4226771   | 7 | 79964860 | A | A | A | A | A   | A |
| 10351 | rs3720958   | 7 | 80403000 | G | A | A | G | A   | G |
| 10352 | rs3683030   | 7 | 80319797 | C | G | G | C | G   | C |
| 10353 | rs3719097   | 7 | 80623111 | A | C | C | C | C   | C |
| 10354 | rs6321517   | 7 | 80887455 | A | G | G | A | G   | G |
| 10355 | rs3714287   | 7 | 81068640 | C | G | G | C | G   | G |
| 10356 | rs3691805   | 7 | 81500798 | C | C | C | A | C   | C |
| 10357 | rs6293103   | 7 | 82058809 | A | A | A | G | A   | A |

|       |             |   |          |   |   |      |   |     |   |
|-------|-------------|---|----------|---|---|------|---|-----|---|
| 10358 | rs6182508   | 7 | 82204546 | A | A | A    | A | A   | A |
| 10359 | rs3704458   | 7 | 83064152 | A | A | A    | G | A   | A |
| 10360 | rs6202435   | 7 | 83149511 | G | G | G    | G | G   | G |
| 10361 | rs3726013   | 7 | 83212590 | G | A | A    | A | A   | A |
| 10362 | rs3717689   | 7 | 83214984 | A | G | G    | A | G   | G |
| 10363 | rs3699086   | 7 | 83322675 | C | C | A    | C | A   | C |
| 10364 | rs6385816   | 7 | 83795009 | G | A | A    | G | A   | A |
| 10365 | rs3023151   | 7 | 83894345 | G | G | A    | G | A   | G |
| 10366 | rs6394612   | 7 | 83973375 | A | A | A    | G | A   | A |
| 10367 | rs3692018   | 7 | 84013500 | A | A | A    | G | A   | A |
| 10368 | rs3675638   | 7 | 84056040 | G | G | C    | G | C   | G |
| 10369 | rs3657451   | 7 | 84225112 | T | T | T    | A | T   | T |
| 10370 | rs4226786   | 7 | 84282400 | C | C | C    | C | C   | C |
| 10371 | rs4226793   | 7 | 84282551 | A | A | A    | A | A   | A |
| 10372 | rs4226794   | 7 | 84282609 | C | C | A    | C | A   | C |
| 10373 | rs4226797   | 7 | 84766938 | G | G | G    | G | G   | G |
| 10374 | rs4226798   | 7 | 84766944 | G | G | G    | G | G   | G |
| 10375 | rs3654376   | 7 | 85138024 | T | T | A    | A | A   | T |
| 10376 | rs6276149   | 7 | 85669930 | G | G | A    | G | A   | G |
| 10377 | rs8281437   | 7 | 85350939 | G | G | A    | G | A   | G |
| 10378 | rs3660677   | 7 | 85370237 | A | A | G    | G | G   | A |
| 10379 | mCV27585803 | 7 | 83376279 | A | A | G    | A | G   | A |
| 10380 | rs8281442   | 7 | 85351767 | A | A | C    | A | C   | A |
| 10381 | rs8281458   | 7 | 85355566 | G | G | A    | A | A   | G |
| 10382 | rs4226811   | 7 | 85443076 | C | C | C    | C | C   | C |
| 10383 | rs4226812   | 7 | 85443106 | A | A | C    | A | C   | A |
| 10384 | rs3707067   | 7 | 85992410 | A | A | C    | C | C   | A |
| 10385 | rs6405344   | 7 | 86185334 | G | G | G    | A | G   | G |
| 10386 | rs6227780   | 7 | 86699867 | G | G | A    | G | A   | G |
| 10387 | rs3679473   | 7 | 87088848 | A | A | A    | G | G   | A |
| 10388 | rs3713440   | 7 | 87022719 | G | G | G    | G | A   | G |
| 10389 | rs6245036   | 7 | 86994794 | G | G | G    | A | G   | G |
| 10390 | rs3709784   | 7 | 86924505 | T | T | A    | T | A   | T |
| 10391 | rs3708313   | 7 | 87777594 | G | G | A    | A | A   | G |
| 10392 | rs4226829   | 7 | 87825318 | C | C | A    | C | A   | C |
| 10393 | rs4226832   | 7 | 87825502 | G | G | A    | G | A   | G |
| 10394 | rs3714598   | 7 | 87990927 | A | A | G    | A | G   | A |
| 10395 | rs3656411   | 7 | 88568797 | G | G | A    | G | A   | G |
| 10396 | rs6279641   | 7 | 88999444 | A | A | G    | G | G   | A |
| 10397 | rs3713052   | 7 | 89115174 | C | C | C    | A | C   | C |
| 10398 | rs3091124   | 7 | 89167841 | A | A | A    | A | A   | A |
| 10399 | rs6213885   | 7 | 89217257 | G | G | A    | G | A   | G |
| 10400 | rs6347862   | 7 | 94336605 | G | G | G    | A | G   | G |
| 10401 | rs3684618   | 7 | 89758909 | A | A | A    | G | A   | A |
| 10402 | rs3667300   | 7 | 89790549 | A | A | A    | G | A   | A |
| 10403 | mCV24825272 | 7 | 84922277 | G | G | A    | G | A   | G |
| 10404 | mCV24825279 | 7 | 84922330 | G | G | A    | G | A   | G |
| 10405 | mCV24825281 | 7 | 84922660 | A | A | G    | G | G   | A |
| 10406 | mCV24825288 | 7 | 84922975 | A | A | G    | G | G   | A |
| 10407 | mCV24825289 | 7 | 84924084 | G | G | A    | G | A   | G |
| 10408 | mCV24825290 | 7 | 84924311 | C | C | G    | C | G   | C |
| 10409 | mCV24825297 | 7 | 84924474 | A | A | C    | A | C   | A |
| 10410 | mCV24825310 | 7 | 84925602 | G | G | C    | G | C   | G |
| 10411 | mCV24825311 | 7 | 84925623 | G | G | A    | G | A   | G |
| 10412 | mCV24825321 | 7 | 84925751 | G | G | A    | G | A   | G |
| 10413 | mCV24825322 | 7 | 84925793 | A | A | C    | A | A/C | A |
| 10414 | mCV24825323 | 7 | 84926399 | G | G | A    | G | A   | G |
| 10415 | mCV24825333 | 7 | 84926478 | A | A | G    | G | G   | A |
| 10416 | mCV24825334 | 7 | 84927993 | A | A | A    | G | A   | A |
| 10417 | mCV24825335 | 7 | 84928043 | A | A | NONE | A | G   | A |
| 10418 | mCV24825606 | 7 | 84928048 | G | G | A    | G | A   | G |
| 10419 | mCV24825629 | 7 | 84932111 | A | A | A    | G | A   | A |
| 10420 | mCV24825630 | 7 | 84932171 | A | A | C    | C | C   | A |
| 10421 | mCV24825631 | 7 | 84932211 | T | T | A    | T | A   | T |
| 10422 | mCV24825642 | 7 | 84932432 | G | G | A    | A | A   | G |
| 10423 | mCV24825652 | 7 | 84932564 | G | G | A    | G | A   | G |
| 10424 | mCV24825665 | 7 | 84933676 | G | G | A    | G | A   | G |
| 10425 | mCV24825666 | 7 | 84934197 | G | G | A    | G | A   | G |
| 10426 | mCV24825676 | 7 | 84934640 | A | A | G    | A | G   | A |
| 10427 | mCV24825677 | 7 | 84934673 | A | A | G    | G | G   | A |
| 10428 | mCV24825689 | 7 | 84935032 | G | G | A    | G | A   | G |
| 10429 | mCV24825950 | 7 | 84935306 | G | G | A    | G | A   | G |
| 10430 | mCV24825962 | 7 | 84935416 | G | G | A    | G | A   | G |
| 10431 | mCV24825973 | 7 | 84935644 | A | A | G    | G | G   | A |

|       |             |   |          |   |   |     |   |     |   |
|-------|-------------|---|----------|---|---|-----|---|-----|---|
| 10432 | mCV24825985 | 7 | 84937818 | G | G | A   | G | A   | G |
| 10433 | mCV24825986 | 7 | 84937960 | G | G | A   | G | A   | G |
| 10434 | mCV24825996 | 7 | 84938091 | G | G | A   | G | A   | G |
| 10435 | mCV24825997 | 7 | 84938175 | A | A | C   | A | C   | A |
| 10436 | mCV24826010 | 7 | 84939101 | A | A | A/G | A | A/G | A |
| 10437 | mCV24826017 | 7 | 84939447 | A | A | C   | A | C   | A |
| 10438 | mCV24826018 | 7 | 84939574 | A | A | G   | A | G   | A |
| 10439 | mCV24826026 | 7 | 84939800 | C | C | A   | C | A   | C |
| 10440 | mCV24826034 | 7 | 84939973 | A | A | A   | G | G   | A |
| 10441 | mCV24826035 | 7 | 84940077 | G | G | A   | A | A   | G |
| 10442 | mCV24826036 | 7 | 84940787 | A | A | A   | T | A   | A |
| 10443 | mCV24165697 | 7 | 95036671 | G | A | G   | A | G   | A |
| 10444 | mCV22563662 | 7 | 84944200 | G | G | A   | G | A   | G |
| 10445 | mCV22563661 | 7 | 84944247 | G | G | A   | G | A   | G |
| 10446 | mCV22563660 | 7 | 84944292 | T | T | A   | T | A   | T |
| 10447 | mCV22563659 | 7 | 84944294 | A | A | A   | G | A   | A |
| 10448 | mCV22563649 | 7 | 95039100 | A | A | G   | A | G   | A |
| 10449 | mCV22563647 | 7 | 84945510 | A | A | T   | A | T   | A |
| 10450 | mCV22563635 | 7 | 84945692 | C | C | A   | C | A   | C |
| 10451 | mCV22563625 | 7 | 84945725 | A | A | A   | A | C   | A |
| 10452 | mCV22563624 | 7 | 95039608 | G | G | A   | G | A   | G |
| 10453 | mCV23132683 | 7 | 85277658 | G | G | A   | A | A   | G |
| 10454 | mCV23539175 | 7 | 85278118 | A | A | C   | C | C   | A |
| 10455 | mCV23539176 | 7 | 85278156 | A | A | A   | G | G   | A |
| 10456 | mCV23539187 | 7 | 85278517 | A | A | A   | G | G   | A |
| 10457 | mCV23539188 | 7 | 85278547 | A | A | C   | C | C   | A |
| 10458 | mCV23539189 | 7 | 85278600 | G | G | G   | A | G   | G |
| 10459 | mCV23539199 | 7 | 85281373 | A | A | G   | G | G   | A |
| 10460 | mCV23539208 | 7 | 85284658 | G | G | A   | G | A   | G |
| 10461 | mCV23539227 | 7 | 85286994 | A | A | A   | G | G   | A |
| 10462 | mCV23539496 | 7 | 85287160 | C | C | C   | A | C   | C |
| 10463 | mCV23539497 | 7 | 85287214 | G | G | A   | G | A   | G |
| 10464 | mCV23539498 | 7 | 85287321 | G | G | A   | G | A   | G |
| 10465 | mCV23539505 | 7 | 85287780 | A | A | C   | C | C   | A |
| 10466 | mCV23539514 | 7 | 85288260 | A | A | G   | G | G   | A |
| 10467 | mCV23539515 | 7 | 85288409 | A | A | A   | A | G   | A |
| 10468 | mCV23539516 | 7 | 85288504 | T | T | T   | A | T   | T |
| 10469 | mCV23539523 | 7 | 85288611 | A | A | G   | A | G   | A |
| 10470 | mCV23539524 | 7 | 85288759 | C | C | A   | C | A   | C |
| 10471 | mCV23539532 | 7 | 85289261 | A | A | A   | G | G   | A |
| 10472 | mCV23539533 | 7 | 85289511 | A | A | A   | G | G   | A |
| 10473 | mCV23539534 | 7 | 85296104 | A | A | G   | G | G   | A |
| 10474 | mCV23539541 | 7 | 85296232 | A | A | G   | G | G   | A |
| 10475 | mCV23539542 | 7 | 85296293 | G | G | A   | A | A   | G |
| 10476 | mCV23539543 | 7 | 85296365 | G | G | A   | A | A   | G |
| 10477 | mCV23539550 | 7 | 85296411 | A | A | A   | G | G   | A |
| 10478 | mCV23539551 | 7 | 85296597 | T | T | T   | A | T   | T |
| 10479 | mCV23539559 | 7 | 85297131 | G | G | A   | A | A   | G |
| 10480 | mCV23539560 | 7 | 85298005 | G | G | G   | A | G   | G |
| 10481 | mCV23539561 | 7 | 85298257 | G | G | A   | G | A   | G |
| 10482 | mCV23539571 | 7 | 85300125 | G | G | A   | A | A   | G |
| 10483 | mCV23539844 | 7 | 85300312 | G | G | A   | A | A   | G |
| 10484 | mCV23539845 | 7 | 85300614 | G | G | A   | A | A   | G |
| 10485 | mCV23539863 | 7 | 85304106 | G | G | A   | A | A   | G |
| 10486 | mCV23539864 | 7 | 85304238 | G | G | A   | G | A   | G |
| 10487 | mCV23539872 | 7 | 85304542 | A | A | C   | A | C   | A |
| 10488 | mCV23539873 | 7 | 85305872 | A | A | G   | G | G   | A |
| 10489 | mCV23539881 | 7 | 85307021 | G | G | A   | G | A   | G |
| 10490 | mCV23539882 | 7 | 85307552 | G | G | A   | G | A   | G |
| 10491 | mCV23539898 | 7 | 85308219 | A | A | A   | G | A   | A |
| 10492 | mCV23539916 | 7 | 85308893 | A | A | G   | G | G   | A |
| 10493 | mCV23539917 | 7 | 85309085 | A | A | A   | G | G   | A |
| 10494 | mCV23540186 | 7 | 85311738 | A | A | G   | G | G   | A |
| 10495 | mCV23540188 | 7 | 85315477 | G | G | A   | A | A   | G |
| 10496 | mCV23540195 | 7 | 85315603 | A | A | G   | G | G   | A |
| 10497 | mCV23540206 | 7 | 85316087 | G | G | A   | A | A   | G |
| 10498 | mCV23540214 | 7 | 85316411 | A | A | A   | G | G   | A |
| 10499 | mCV23540215 | 7 | 85318856 | A | A | G   | G | G   | A |
| 10500 | mCV23540216 | 7 | 85319010 | G | G | G   | A | G   | G |
| 10501 | mCV23540223 | 7 | 85319189 | G | G | A   | A | A   | G |
| 10502 | mCV23540224 | 7 | 85319223 | A | A | G   | G | G   | A |
| 10503 | mCV24168434 | 7 | 85320087 | A | A | G   | G | G   | A |
| 10504 | mCV24168441 | 7 | 85320112 | G | G | A   | G | A   | G |
| 10505 | mCV24168442 | 7 | 85320113 | A | A | G   | A | G   | A |

|       |             |   |          |   |   |   |      |   |   |
|-------|-------------|---|----------|---|---|---|------|---|---|
| 10506 | mCV24168443 | 7 | 85320568 | C | C | A | C    | A | C |
| 10507 | mCV24168450 | 7 | 85320645 | A | A | G | A    | G | A |
| 10508 | mCV24168451 | 7 | 85320758 | C | C | A | C    | A | C |
| 10509 | mCV24168452 | 7 | 85320916 | T | T | A | T    | A | T |
| 10510 | mCV24168459 | 7 | 85320984 | G | G | A | G    | A | G |
| 10511 | mCV24168468 | 7 | 85321131 | C | C | A | C    | A | C |
| 10512 | mCV24168470 | 7 | 85321396 | A | A | G | A    | G | A |
| 10513 | mCV24168478 | 7 | 85322344 | A | A | G | A    | G | A |
| 10514 | mCV24168479 | 7 | 85322662 | A | A | C | A    | C | A |
| 10515 | mCV24168486 | 7 | 85322705 | A | A | G | G    | G | A |
| 10516 | mCV24168799 | 7 | 85325167 | C | C | C | C    | C | C |
| 10517 | mCV24168800 | 7 | 85325204 | A | A | A | G    | A | A |
| 10518 | mCV24168812 | 7 | 85325578 | G | G | A | G    | A | G |
| 10519 | mCV24168822 | 7 | 85325602 | A | A | G | A    | G | A |
| 10520 | mCV24168823 | 7 | 85325675 | G | G | G | A    | G | G |
| 10521 | mCV24168824 | 7 | 85325848 | A | A | A | C    | A | A |
| 10522 | mCV24168832 | 7 | 85327381 | G | G | A | A    | A | G |
| 10523 | mCV24168837 | 7 | 85327738 | G | G | A | G    | A | G |
| 10524 | mCV24168838 | 7 | 85328672 | A | A | A | A    | G | A |
| 10525 | mCV24168839 | 7 | 85329200 | A | A | G | G    | G | A |
| 10526 | rs3691784   | 7 | 91117567 | A | A | A | T    | A | A |
| 10527 | rs3703889   | 7 | 91141265 | G | G | G | C    | G | G |
| 10528 | rs6156210   | 7 | 91148882 | C | C | C | C    | C | C |
| 10529 | rs3716529   | 7 | 91226327 | G | G | G | A    | G | G |
| 10530 | rs3717789   | 7 | 91226499 | G | G | G | A    | G | G |
| 10531 | rs3673390   | 7 | 91243830 | G | G | G | C    | G | G |
| 10532 | rs3717027   | 7 | 91403573 | G | G | G | A    | G | G |
| 10533 | rs3662937   | 7 | 91751530 | G | G | G | A    | G | G |
| 10534 | rs6340833   | 7 | 91928124 | G | G | G | A    | G | G |
| 10535 | rs3699690   | 7 | 91917846 | A | A | A | G    | A | A |
| 10536 | rs3659348   | 7 | 91909237 | A | A | A | G    | A | A |
| 10537 | mCV23558673 | 7 | 87087133 | A | A | G | A    | G | A |
| 10538 | mCV23558677 | 7 | 87087210 | G | G | G | A    | G | G |
| 10539 | mCV23558678 | 7 | 87087278 | A | A | A | G    | A | A |
| 10540 | mCV23558679 | 7 | 87087308 | T | T | A | T    | A | T |
| 10541 | mCV23558684 | 7 | 87087869 | A | A | C | A    | C | A |
| 10542 | mCV23558950 | 7 | 87087940 | G | G | A | G    | A | G |
| 10543 | mCV23558951 | 7 | 87088172 | A | A | G | A    | G | A |
| 10544 | mCV23558952 | 7 | 87088220 | A | A | G | A    | G | A |
| 10545 | mCV23558956 | 7 | 87088276 | C | C | G | C    | G | C |
| 10546 | mCV23558957 | 7 | 87088644 | G | G | A | G    | A | G |
| 10547 | mCV23558958 | 7 | 87088745 | A | A | G | G    | G | A |
| 10548 | mCV23558968 | 7 | 87089503 | G | G | A | G    | A | G |
| 10549 | mCV23558969 | 7 | 87089859 | G | G | A | G    | A | G |
| 10550 | mCV23558970 | 7 | 87090707 | G | G | A | G    | A | G |
| 10551 | mCV23558974 | 7 | 87090730 | A | A | G | A    | G | A |
| 10552 | mCV23558975 | 7 | 87090875 | T | T | A | T    | A | T |
| 10553 | mCV23558976 | 7 | 87090973 | G | G | C | G    | C | G |
| 10554 | mCV23558980 | 7 | 87091032 | A | A | G | NONE | G | A |
| 10555 | mCV23559034 | 7 | 87098130 | A | A | G | A    | G | A |
| 10556 | mCV23559035 | 7 | 87098261 | A | A | G | A    | G | A |
| 10557 | mCV24183719 | 7 | 87102837 | G | G | G | A    | G | G |
| 10558 | mCV24183720 | 7 | 87102980 | A | A | G | G    | G | A |
| 10559 | mCV24183721 | 7 | 87103326 | G | G | A | G    | A | G |
| 10560 | mCV24183723 | 7 | 87103467 | G | G | A | G    | A | G |
| 10561 | mCV24183724 | 7 | 87103719 | A | A | C | A    | C | A |
| 10562 | mCV24183725 | 7 | 87103964 | T | T | A | T    | A | T |
| 10563 | mCV24184116 | 7 | 87104337 | G | G | A | A    | A | G |
| 10564 | mCV24184399 | 7 | 87105118 | A | A | G | G    | G | A |
| 10565 | rs3090793   | 7 | 92868435 | A | A | A | A    | A | A |
| 10566 | rs6199622   | 7 | 93011140 | A | A | A | A    | A | A |
| 10567 | rs3719495   | 7 | 93674602 | G | G | A | A    | G | A |
| 10568 | mCV23569777 | 7 | 88604052 | A | A | G | A    | G | A |
| 10569 | rs6229068   | 7 | 93784113 | A | A | A | G    | A | G |
| 10570 | rs3673653   | 7 | 94344049 | G | G | G | A    | G | A |
| 10571 | rs3711721   | 7 | 94492631 | G | G | G | A    | G | A |
| 10572 | rs3657164   | 7 | 94495926 | G | G | G | A    | G | A |
| 10573 | rs4137246   | 7 | 94502140 | A | A | A | G    | A | G |
| 10574 | rs6386601   | 7 | 94870318 | A | C | A | C    | A | C |
| 10575 | rs3718785   | 7 | 94910264 | A | G | A | G    | A | G |
| 10576 | rs6381106   | 7 | 95730393 | A | A | A | A    | A | A |
| 10577 | rs6318508   | 7 | 96484614 | C | C | C | C    | C | C |
| 10578 | rs6289536   | 7 | 97189861 | G | G | G | G    | G | G |
| 10579 | rs3686975   | 7 | 97250105 | A | A | A | G    | A | A |

|       |             |   |           |   |   |   |   |      |   |
|-------|-------------|---|-----------|---|---|---|---|------|---|
| 10580 | rs6349890   | 7 | 98034092  | A | C | A | A | A    | A |
| 10581 | rs3089162   | 7 | 98208847  | G | G | G | G | G    | G |
| 10582 | mCV24704879 | 7 | 103332415 | A | A | A | T | A    | T |
| 10583 | rs6319753   | 7 | 98979613  | A | A | A | A | A    | A |
| 10584 | rs3726501   | 7 | 99098855  | A | A | A | G | A    | A |
| 10585 | rs3670388   | 7 | 99099446  | A | A | A | C | A    | A |
| 10586 | rs3670446   | 7 | 99222217  | A | A | A | G | A    | A |
| 10587 | rs3708100   | 7 | 99278326  | A | A | A | G | A    | A |
| 10588 | rs3711843   | 7 | 99278945  | G | G | G | C | G    | G |
| 10589 | rs6325331   | 7 | 99485551  | G | G | G | G | G    | G |
| 10590 | rs3679005   | 7 | 99595293  | A | A | A | G | A    | A |
| 10591 | mCV24718258 | 7 | 94833948  | G | A | G | A | G    | A |
| 10592 | mCV24718259 | 7 | 94834198  | G | C | G | C | G    | C |
| 10593 | mCV24718282 | 7 | 94837101  | T | A | T | A | T    | A |
| 10594 | mCV24718283 | 7 | 94837294  | A | T | A | T | A    | T |
| 10595 | mCV24718294 | 7 | 94837572  | G | A | G | A | G    | A |
| 10596 | mCV24718295 | 7 | 94837713  | C | G | C | G | C    | G |
| 10597 | mCV24718306 | 7 | 94839634  | A | T | A | T | A    | T |
| 10598 | mCV24718307 | 7 | 94839720  | G | A | G | A | G    | A |
| 10599 | mCV24718491 | 7 | 94841921  | G | A | G | A | G    | A |
| 10600 | mCV24718492 | 7 | 94844400  | A | G | A | G | A    | G |
| 10601 | mCV24718493 | 7 | 94844406  | A | C | A | C | A    | C |
| 10602 | mCV24718516 | 7 | 94844959  | C | A | C | A | C    | A |
| 10603 | mCV24718527 | 7 | 94845074  | A | G | A | G | A    | G |
| 10604 | mCV24718528 | 7 | 94845099  | A | G | A | G | A    | G |
| 10605 | mCV24718538 | 7 | 94845231  | G | A | G | A | G    | A |
| 10606 | mCV24718539 | 7 | 94848734  | G | A | G | A | G    | A |
| 10607 | mCV24718540 | 7 | 94849280  | T | A | T | A | T    | A |
| 10608 | mCV24718551 | 7 | 104560280 | C | A | C | A | C    | A |
| 10609 | mCV24718552 | 7 | 94852300  | C | G | C | G | C    | G |
| 10610 | mCV24718562 | 7 | 94852551  | G | C | G | C | G    | C |
| 10611 | mCV24718564 | 7 | 94855883  | C | A | C | A | C    | A |
| 10612 | mCV24718835 | 7 | 94856305  | A | G | A | G | A    | G |
| 10613 | mCV24718837 | 7 | 94857218  | A | G | A | G | A    | G |
| 10614 | mCV24718847 | 7 | 94857478  | A | G | A | G | A    | G |
| 10615 | mCV24718848 | 7 | 94857545  | A | G | A | G | A    | G |
| 10616 | mCV24718849 | 7 | 94858207  | G | A | G | A | NONE | A |
| 10617 | rs3674465   | 7 | 100006800 | A | A | A | G | A    | G |
| 10618 | mCV23009137 | 7 | 95354456  | A | A | A | A | T    | A |
| 10619 | rs6280792   | 7 | 100322193 | A | A | A | G | A    | G |
| 10620 | rs3698711   | 7 | 100246522 | A | A | A | G | G    | G |
| 10621 | rs4226867   | 7 | 100841896 | G | G | G | G | G    | G |
| 10622 | rs4226866   | 7 | 100841770 | C | C | A | C | A    | C |
| 10623 | rs3691339   | 7 | 100823708 | G | G | A | G | A    | G |
| 10624 | rs3724711   | 7 | 101325771 | A | A | A | G | G    | G |
| 10625 | rs3657482   | 7 | 101345671 | C | C | A | C | A    | C |
| 10626 | rs3023155   | 7 | 101359397 | A | A | G | A | G    | A |
| 10627 | mCV27572454 | 7 | 96546544  | G | A | G | G | G    | G |
| 10628 | rs6194926   | 7 | 101647757 | G | A | A | G | A    | G |
| 10629 | rs3675993   | 7 | 102430244 | A | G | A | G | A    | A |
| 10630 | rs3658524   | 7 | 102429588 | G | A | A | A | G    | G |
| 10631 | rs6160824   | 7 | 102478563 | A | G | A | G | A    | G |
| 10632 | rs3705945   | 7 | 102839081 | G | C | G | C | G    | C |
| 10633 | rs3691303   | 7 | 102929987 | A | G | A | G | A    | G |
| 10634 | rs6372710   | 7 | 103158168 | A | G | A | G | A    | G |
| 10635 | rs3667146   | 7 | 103291992 | A | G | A | G | A    | G |
| 10636 | rs3669014   | 7 | 103292309 | G | A | A | A | G    | A |
| 10637 | rs4139261   | 7 | 103315827 | G | A | G | A | G    | A |
| 10638 | rs4226868   | 7 | 103406388 | C | C | C | C | C    | C |
| 10639 | rs3656074   | 7 | 103416924 | G | A | G | A | G    | A |
| 10640 | mCV24724415 | 7 | 98451431  | G | G | G | G | G    | G |
| 10641 | rs3089475   | 7 | 103711221 | A | G | G | G | G    | G |
| 10642 | rs6382230   | 7 | 103730679 | G | C | C | C | C    | C |
| 10643 | rs3690155   | 7 | 103972292 | G | A | G | A | G    | A |
| 10644 | rs3676820   | 7 | 104478024 | A | G | G | G | G    | G |
| 10645 | rs6200962   | 7 | 104427524 | A | G | A | G | G    | G |
| 10646 | rs3090098   | 7 | 104568134 | C | A | A | A | A    | A |
| 10647 | rs3721457   | 7 | 104981763 | A | G | G | G | G    | G |
| 10648 | rs3725542   | 7 | 105166893 | G | A | G | A | G    | A |
| 10649 | rs4226870   | 7 | 105414280 | G | A | G | A | G    | A |
| 10650 | mCV24766407 | 7 | 100596619 | T | T | A | A | A    | A |
| 10651 | rs6277857   | 7 | 105648788 | G | A | A | A | G    | A |
| 10652 | rs6305308   | 7 | 105951762 | G | A | G | A | G    | A |
| 10653 | rs4226872   | 7 | 106033606 | C | C | C | C | C    | C |



|       |             |   |           |   |   |   |   |   |   |
|-------|-------------|---|-----------|---|---|---|---|---|---|
| 10654 | rs3693791   | 7 | 106277306 | A | G | A | G | A | G |
| 10655 | rs3665698   | 7 | 106540390 | G | A | G | G | G | G |
| 10656 | rs6241342   | 7 | 106479164 | A | G | G | A | G | A |
| 10657 | rs6193654   | 7 | 106470742 | G | A | G | A | G | A |
| 10658 | rs3722112   | 7 | 106465439 | A | C | A | C | A | C |
| 10659 | rs6366212   | 7 | 106414059 | A | G | A | G | A | G |
| 10660 | rs3671145   | 7 | 106768482 | G | A | G | G | G | G |
| 10661 | rs2020676   | 7 | 107083294 | G | G | A | G | G | G |
| 10662 | rs3709679   | 7 | 107424656 | C | A | G | C | A | C |
| 10663 | mCV24779699 | 7 | 102696760 | A | G | A | G | A | G |
| 10664 | rs6322316   | 7 | 107988664 | G | G | G | A | G | G |
| 10665 | rs6258892   | 7 | 108969067 | A | T | A | A | A | A |
| 10666 | rs3666152   | 7 | 109411567 | G | A | A | A | A | A |
| 10667 | rs3666823   | 7 | 109411717 | G | A | A | A | A | A |
| 10668 | rs3089537   | 7 | 109861519 | T | T | T | T | T | T |
| 10669 | rs3682921   | 7 | 109867352 | G | G | A | A | A | G |
| 10670 | rs6275579   | 7 | 111285662 | G | A | G | G | G | A |
| 10671 | mCV24823383 | 7 | 106783744 | A | G | G | A | G | A |
| 10672 | mCV24823391 | 7 | 106784111 | G | G | A | G | A | G |
| 10673 | mCV24823392 | 7 | 106784312 | G | G | A | G | A | G |
| 10674 | mCV24823393 | 7 | 106784440 | A | A | G | A | G | A |
| 10675 | mCV24823403 | 7 | 106784539 | G | G | A | G | A | G |
| 10676 | mCV24823404 | 7 | 106784642 | A | A | G | A | G | A |
| 10677 | mCV24823415 | 7 | 106784744 | A | A | G | A | G | A |
| 10678 | mCV24823416 | 7 | 106786834 | A | G | G | A | G | A |
| 10679 | mCV24823427 | 7 | 106786947 | A | A | C | A | C | A |
| 10680 | mCV24823428 | 7 | 106787047 | A | A | G | A | G | A |
| 10681 | mCV24823429 | 7 | 106787204 | A | A | C | A | C | A |
| 10682 | mCV24823712 | 7 | 106787546 | G | G | C | G | C | G |
| 10683 | mCV24823713 | 7 | 106787547 | G | G | A | G | A | G |
| 10684 | mCV24823735 | 7 | 106788936 | A | G | G | A | G | A |
| 10685 | mCV24823736 | 7 | 106788956 | A | A | G | A | G | A |
| 10686 | mCV24823747 | 7 | 106789457 | A | A | G | A | G | A |
| 10687 | mCV24823748 | 7 | 106789501 | G | G | A | G | A | G |
| 10688 | mCV24823749 | 7 | 106789757 | A | A | G | A | G | A |
| 10689 | mCV24823759 | 7 | 106789827 | G | G | A | G | A | G |
| 10690 | mCV24823760 | 7 | 106790034 | G | G | A | G | A | G |
| 10691 | mCV24823761 | 7 | 106790084 | A | A | G | A | G | A |
| 10692 | mCV24823772 | 7 | 106792624 | A | C | C | A | C | A |
| 10693 | mCV24824044 | 7 | 106792920 | A | G | G | A | G | A |
| 10694 | mCV24824045 | 7 | 106793340 | C | C | A | C | A | C |
| 10695 | mCV24824046 | 7 | 106793487 | G | G | A | G | A | G |
| 10696 | mCV24824070 | 7 | 106794019 | G | G | A | G | A | G |
| 10697 | mCV24824080 | 7 | 106794027 | G | G | A | G | A | G |
| 10698 | mCV24824081 | 7 | 106794441 | A | A | G | A | G | A |
| 10699 | mCV24824082 | 7 | 106794674 | G | G | A | G | A | G |
| 10700 | mCV24824092 | 7 | 106794720 | G | G | C | G | C | G |
| 10701 | mCV24824093 | 7 | 106795098 | G | G | C | G | C | G |
| 10702 | mCV24824094 | 7 | 106795174 | A | G | A | A | A | A |
| 10703 | mCV24824104 | 7 | 106795176 | C | C | A | C | A | C |
| 10704 | mCV24824400 | 7 | 106797003 | G | G | A | G | A | G |
| 10705 | mCV24824401 | 7 | 106797593 | A | A | G | A | G | A |
| 10706 | mCV24824402 | 7 | 106797929 | G | G | A | G | A | G |
| 10707 | mCV24824412 | 7 | 106798637 | A | A | G | A | G | A |
| 10708 | mCV24824413 | 7 | 106798841 | A | A | C | A | C | A |
| 10709 | mCV24824414 | 7 | 106798942 | G | A | A | G | A | G |
| 10710 | mCV24824424 | 7 | 106799248 | A | A | G | A | G | A |
| 10711 | mCV24824425 | 7 | 106799373 | G | G | A | G | A | G |
| 10712 | mCV24824448 | 7 | 106800225 | A | G | G | A | G | A |
| 10713 | mCV24824449 | 7 | 106800333 | A | A | G | A | G | A |
| 10714 | mCV24824450 | 7 | 116427685 | G | G | C | G | C | G |
| 10715 | mCV24824460 | 7 | 106800594 | G | A | A | G | A | G |
| 10716 | mCV24824461 | 7 | 106800870 | A | G | G | A | G | A |
| 10717 | mCV24824462 | 7 | 106801071 | G | A | G | G | G | G |
| 10718 | mCV24825103 | 7 | 106801200 | A | A | G | A | G | A |
| 10719 | mCV24825104 | 7 | 106810050 | A | A | A | A | G | A |
| 10720 | mCV24825105 | 7 | 106810099 | G | G | A | G | A | G |
| 10721 | mCV24269205 | 7 | 107060853 | A | C | C | A | C | A |
| 10722 | mCV24269206 | 7 | 107061372 | A | G | G | A | G | A |
| 10723 | mCV23658450 | 7 | 107063710 | A | G | G | A | G | A |
| 10724 | mCV23658451 | 7 | 107064246 | A | C | C | A | C | A |
| 10725 | mCV23658452 | 7 | 107065603 | C | A | A | C | A | C |
| 10726 | mCV23658722 | 7 | 107070757 | G | A | A | G | A | G |
| 10727 | mCV23658723 | 7 | 107071013 | C | A | A | C | A | C |

|       |             |   |           |   |   |   |   |      |   |
|-------|-------------|---|-----------|---|---|---|---|------|---|
| 10728 | mCV23658724 | 7 | 107071123 | A | T | T | A | T    | A |
| 10729 | mCV23658734 | 7 | 107071288 | G | A | A | G | A    | G |
| 10730 | mCV23658735 | 7 | 107073039 | G | A | A | G | A    | G |
| 10731 | mCV23658736 | 7 | 107073138 | G | A | A | G | A    | G |
| 10732 | mCV23658746 | 7 | 107073915 | C | A | A | C | A    | C |
| 10733 | mCV23658771 | 7 | 116700730 | A | G | G | A | G    | A |
| 10734 | mCV23658772 | 7 | 107079833 | A | G | G | A | G    | A |
| 10735 | mCV23658784 | 7 | 107080719 | G | A | A | G | A    | G |
| 10736 | mCV23658796 | 7 | 107080809 | G | A | A | G | A    | G |
| 10737 | mCV23659065 | 7 | 107081189 | A | G | G | A | G    | A |
| 10738 | mCV23659067 | 7 | 107082369 | A | G | G | A | G    | A |
| 10739 | rs3674165   | 7 | 112197433 | G | G | A | A | A    | G |
| 10740 | mCV24269234 | 7 | 107252093 | G | A | A | G | A    | G |
| 10741 | rs6163967   | 7 | 112276217 | G | G | A | G | G    | G |
| 10742 | rs3665969   | 7 | 112378938 | A | C | C | C | C    | A |
| 10743 | rs8259860   | 7 | 113024642 | C | C | C | C | C    | C |
| 10744 | rs4226888   | 7 | 113114338 | G | G | G | G | G    | G |
| 10745 | rs4226889   | 7 | 113114379 | G | G | G | G | G    | G |
| 10746 | rs3666076   | 7 | 113129199 | C | C | C | C | C    | C |
| 10747 | rs6317057   | 7 | 113366854 | G | G | A | A | A    | G |
| 10748 | rs3691633   | 7 | 113593665 | G | A | A | A | A    | G |
| 10749 | rs3682038   | 7 | 113814867 | A | A | G | G | G    | A |
| 10750 | rs4226893   | 7 | 113920280 | G | G | G | G | G    | G |
| 10751 | rs8258004   | 7 | 114147403 | G | A | A | G | G    | G |
| 10752 | rs8258009   | 7 | 114149744 | A | G | G | A | A    | A |
| 10753 | rs3090575   | 7 | 113883831 | A | A | A | A | A    | A |
| 10754 | rs6177431   | 7 | 114442529 | G | A | G | G | G    | G |
| 10755 | mCV24278240 | 7 | 110114632 | G | A | G | G | G    | A |
| 10756 | rs3687061   | 7 | 115134183 | G | G | A | G | NONE | G |
| 10757 | rs3697227   | 7 | 115138631 | G | G | A | G | G    | G |
| 10758 | rs4226901   | 7 | 115274716 | A | A | A | A | A    | A |
| 10759 | rs6278159   | 7 | 115403696 | G | G | G | G | G    | G |
| 10760 | rs6258497   | 7 | 115551297 | A | G | G | G | G    | G |
| 10761 | rs4226910   | 7 | 115677022 | A | C | C | C | C    | A |
| 10762 | rs6169594   | 7 | 115837321 | G | G | G | G | G    | G |
| 10763 | rs4226914   | 7 | 116173064 | C | C | C | C | C    | C |
| 10764 | rs3023161   | 7 | 116799239 | A | G | G | G | G    | G |
| 10765 | mCV23674762 | 7 | 111918521 | C | A | C | C | C    | C |
| 10766 | rs6198199   | 7 | 116945922 | G | A | A | A | A    | A |
| 10767 | rs3690404   | 7 | 117141022 | G | A | A | A | A    | A |
| 10768 | rs4226920   | 7 | 117141391 | G | G | A | G | G    | G |
| 10769 | rs3706605   | 7 | 117141430 | C | A | A | A | A    | A |
| 10770 | rs6386671   | 7 | 117314860 | A | G | G | G | G    | G |
| 10771 | rs3682424   | 7 | 117428333 | G | A | A | A | A    | A |
| 10772 | rs6178830   | 7 | 118392269 | G | G | G | G | G    | G |
| 10773 | rs4226927   | 7 | 118553289 | G | G | G | G | G    | G |
| 10774 | rs8236684   | 7 | 118599350 | G | A | G | G | G    | G |
| 10775 | rs8236688   | 7 | 118600522 | G | A | G | G | G    | G |
| 10776 | rs8265215   | 7 | 118877622 | G | G | G | G | G    | G |
| 10777 | rs8265232   | 7 | 118879650 | G | G | G | G | G    | G |
| 10778 | rs6391421   | 7 | 119396732 | C | A | C | C | C    | C |
| 10779 | rs4226941   | 7 | 120193334 | A | A | A | A | A    | A |
| 10780 | rs6245165   | 7 | 120355402 | A | A | A | A | A    | A |
| 10781 | rs3700735   | 7 | 120509370 | G | A | G | A | G    | A |
| 10782 | rs3716088   | 7 | 120621563 | C | C | C | A | C    | C |
| 10783 | rs6389165   | 7 | 121281233 | A | A | A | A | A    | A |
| 10784 | rs8236382   | 7 | 121315434 | A | A | A | A | A    | A |
| 10785 | rs8265338   | 7 | 121333063 | A | A | A | A | A    | A |
| 10786 | rs8257783   | 7 | 121337404 | A | A | A | A | A    | A |
| 10787 | rs8257806   | 7 | 121340014 | G | G | G | G | G    | G |
| 10788 | rs8257815   | 7 | 121342157 | G | G | G | G | G    | G |
| 10789 | mCV24295271 | 7 | 116532669 | C | A | A | A | A    | A |
| 10790 | rs3715149   | 7 | 121639861 | A | A | A | A | A    | A |
| 10791 | rs3711674   | 7 | 121752018 | C | C | C | A | A    | A |
| 10792 | rs6181921   | 7 | 122045918 | C | C | C | A | A    | C |
| 10793 | rs4228413   | 7 | 122285966 | A | A | A | A | A    | A |
| 10794 | rs3719258   | 7 | 122310587 | A | A | A | G | G    | A |
| 10795 | rs3691256   | 7 | 122316285 | G | G | G | A | A    | G |
| 10796 | rs6162937   | 7 | 123362744 | A | A | A | A | A    | A |
| 10797 | rs4226949   | 7 | 123900001 | A | A | A | A | A    | A |
| 10798 | rs6361727   | 7 | 124106225 | C | C | C | C | G    | C |
| 10799 | mCV24302212 | 7 | 119197674 | A | A | A | G | G    | G |
| 10800 | rs6210610   | 7 | 125244618 | A | A | A | A | G    | A |
| 10801 | rs6392543   | 7 | 125772315 | G | G | G | G | A    | G |

|       |             |    |           |      |   |     |   |     |   |
|-------|-------------|----|-----------|------|---|-----|---|-----|---|
| 10802 | rs3680633   | 7  | 130790118 | G    | G | G   | G | G   | G |
| 10803 | rs6387891   | 7  | 126918848 | G    | G | G   | A | G   | G |
| 10804 | rs3663988   | 7  | 126965988 | A    | A | A   | G | A   | A |
| 10805 | rs6303477   | 7  | 127209009 | G    | G | G   | A | G   | G |
| 10806 | rs3660122   | 7  | 127227445 | A    | A | A   | G | A   | A |
| 10807 | rs3659292   | 7  | 127330792 | A    | A | A   | G | A   | A |
| 10808 | rs3710520   | 7  | 127435326 | G    | G | G   | A | A   | G |
| 10809 | rs3702235   | 7  | 127580455 | A    | A | A   | G | G   | A |
| 10810 | rs6299045   | 7  | 127811588 | A    | A | A   | A | A   | G |
| 10811 | rs8268006   | 7  | 128458425 | A    | A | A   | A | A   | A |
| 10812 | rs8268010   | 7  | 128462367 | G    | G | G   | G | G   | G |
| 10813 | rs8268014   | 7  | 128463197 | A    | A | A   | A | A   | A |
| 10814 | rs4226966   | 7  | 128552828 | G    | G | G   | G | G   | G |
| 10815 | rs6398876   | 7  | 128756845 | A    | A | A   | A | A   | A |
| 10816 | rs6164802   | 7  | 129071169 | G    | G | G   | G | G   | G |
| 10817 | rs8248857   | 7  | 129129838 | A    | A | A   | A | A   | A |
| 10818 | rs8240223   | 7  | 129160048 | A    | A | A   | A | A   | A |
| 10819 | rs3720654   | 7  | 129185119 | A    | A | A   | A | A   | A |
| 10820 | rs6366172   | 7  | 129251519 | G    | G | G   | G | G   | G |
| 10821 | rs8257967   | 7  | 129572235 | A    | A | A   | A | A   | A |
| 10822 | rs4226975   | 7  | 129577442 | A    | A | A   | A | A   | A |
| 10823 | mCV22291963 | 7  | 125007357 | G    | G | G   | G | A   | G |
| 10824 | rs3702894   | 7  | 130056639 | A    | A | A   | A | A   | A |
| 10825 | rs6254434   | 7  | 130220537 | A    | A | A   | A | A   | A |
| 10826 | mCV24846744 | 7  | 125526299 | A    | A | A   | A | G   | A |
| 10827 | rs8246090   | 7  | 130366433 | A    | A | A   | A | A   | A |
| 10828 | rs8246158   | 7  | 130371713 | A    | A | A   | A | A   | A |
| 10829 | rs8246189   | 7  | 130376582 | G    | G | G   | G | G   | G |
| 10830 | rs8246191   | 7  | 130376730 | G    | G | G   | G | G   | G |
| 10831 | rs3675981   | 7  | 131717874 | NONE | A | A   | A | A   | A |
| 10832 | rs6318605   | 7  | 131542341 | G    | G | G   | G | G   | G |
| 10833 | rs4226995   | 7  | 131554187 | G    | G | G   | G | G   | G |
| 10834 | rs3710198   | 7  | 131575886 | A    | A | A   | A | A   | A |
| 10835 | rs3686436   | 7  | 132152308 | A/G  | A | A/G | G | A/G | G |
| 10836 | rs6212186   | 7  | 132173375 | G    | G | G   | A | G   | A |
| 10837 | rs8243991   | 7  | 132610320 | A    | A | A   | C | A   | A |
| 10838 | rs8244014   | 7  | 132610023 | G    | G | G   | G | G   | G |
| 10839 | rs8248881   | 7  | 132609406 | G    | G | G   | G | G   | G |
| 10840 | rs8248872   | 7  | 132607280 | C    | C | C   | C | C   | C |
| 10841 | rs4226997   | 7  | 132606551 | G    | G | G   | A | G   | G |
| 10842 | rs3666160   | 7  | 132546916 | A    | A | A   | G | A   | G |
| 10843 | rs3725972   | 7  | 132751185 | G    | G | G   | A | G   | G |
| 10844 | rs3709741   | 7  | 132750908 | A    | A | A   | G | A   | A |
| 10845 | rs3694146   | 7  | 132710913 | G    | G | G   | A | G   | G |
| 10846 | rs3714636   | 7  | 132657269 | A    | A | A   | C | A   | A |
| 10847 | rs6216320   | 7  | 132894685 | A    | A | A   | G | A   | A |
| 10848 | mCV25263465 | 7  | 131854482 | T    | A | A   | A | A   | A |
| 10849 | mCV23816735 | 17 | 20171689  | G    | G | A   | A | G   | A |
| 10850 | mCV23496932 | 17 | 20196932  | A    | A | G   | G | A   | G |
| 10851 | mCV23822994 | 17 | 21580353  | G    | G | A   | A | G   | A |
| 10852 | mCV25175177 | 8  | 4965824   | G    | A | A   | A | A   | A |
| 10853 | rs6297682   | 8  | 3090708   | A    | G | G   | G | G   | G |
| 10854 | rs3662707   | 8  | 3185643   | C    | A | A   | A | A   | A |
| 10855 | rs3694261   | 8  | 3222134   | A    | G | G   | G | G   | G |
| 10856 | rs6343953   | 8  | 3348981   | A    | G | G   | G | G   | G |
| 10857 | rs3683766   | 8  | 3454208   | G    | C | C   | C | C   | C |
| 10858 | rs3711570   | 8  | 4193008   | C    | A | A   | A | A   | A |
| 10859 | rs6407785   | 8  | 4258532   | A    | C | C   | C | C   | C |
| 10860 | rs3691770   | 8  | 4280007   | A    | G | G   | G | G   | G |
| 10861 | rs4227016   | 8  | 4280044   | G    | G | G   | G | G   | G |
| 10862 | rs3692453   | 8  | 4280149   | A    | G | G   | G | G   | G |
| 10863 | rs3711928   | 8  | 4670120   | G    | A | A   | A | A   | A |
| 10864 | rs6267431   | 8  | 5299732   | A    | G | G   | G | G   | G |
| 10865 | rs3695650   | 8  | 5400235   | C    | A | A   | A | A   | A |
| 10866 | rs3685615   | 8  | 5614128   | G    | A | A   | A | A   | A |
| 10867 | rs3714139   | 8  | 5780286   | G    | G | G   | G | G   | G |
| 10868 | rs3683955   | 8  | 6072916   | T    | A | A   | A | A   | A |
| 10869 | rs3687825   | 8  | 6074974   | G    | A | A   | A | A   | A |
| 10870 | rs6378648   | 8  | 6190746   | A    | G | G   | G | G   | G |
| 10871 | rs3688544   | 8  | 6763317   | G    | A | A   | A | A   | A |
| 10872 | rs6360601   | 8  | 6795642   | A    | C | C   | C | C   | C |
| 10873 | rs3681707   | 8  | 6874349   | G    | A | A   | A | A   | A |
| 10874 | rs3681890   | 8  | 6874427   | A    | G | G   | G | G   | G |
| 10875 | rs3664009   | 8  | 7286424   | A    | T | T   | T | T   | T |

|       |             |   |          |   |   |   |   |      |   |
|-------|-------------|---|----------|---|---|---|---|------|---|
| 10876 | rs6273176   | 8 | 7842210  | G | A | A | A | A    | G |
| 10877 | rs6153168   | 8 | 8294541  | G | A | A | A | A    | G |
| 10878 | rs3725303   | 8 | 8442439  | A | G | G | G | G    | A |
| 10879 | mCV23753467 | 8 | 11544017 | G | A | A | A | A    | A |
| 10880 | rs4227020   | 8 | 9202641  | T | T | T | T | T    | T |
| 10881 | rs6258365   | 8 | 9285636  | A | A | A | A | A    | A |
| 10882 | rs6323083   | 8 | 9850819  | A | A | A | A | A    | A |
| 10883 | rs4227021   | 8 | 9990921  | A | A | A | A | A    | A |
| 10884 | rs4227024   | 8 | 9992386  | A | A | A | A | A    | A |
| 10885 | rs6380983   | 8 | 10200537 | G | G | G | G | G    | G |
| 10886 | rs3090043   | 8 | 10521711 | G | G | G | G | G    | G |
| 10887 | rs3667295   | 8 | 11144090 | G | A | A | A | A    | A |
| 10888 | rs3658335   | 8 | 11342753 | G | A | A | A | A    | A |
| 10889 | rs6190217   | 8 | 11448141 | A | A | A | A | A    | A |
| 10890 | rs6256565   | 8 | 12153575 | G | G | G | G | NONE | G |
| 10891 | rs6288205   | 8 | 12260500 | C | C | C | C | C    | C |
| 10892 | rs4227033   | 8 | 12884853 | A | G | G | G | G    | G |
| 10893 | rs6359406   | 8 | 13190527 | G | G | G | G | G    | G |
| 10894 | rs4227035   | 8 | 13274389 | A | A | A | A | A    | A |
| 10895 | rs4227049   | 8 | 13911274 | A | A | A | A | A    | A |
| 10896 | rs4227053   | 8 | 13911495 | G | G | G | G | G    | G |
| 10897 | rs6410533   | 8 | 14327885 | G | G | G | G | G    | G |
| 10898 | rs6343961   | 8 | 14514674 | A | A | A | C | A    | A |
| 10899 | rs3670924   | 8 | 14515925 | A | A | A | G | A    | A |
| 10900 | rs3694208   | 8 | 14730616 | T | T | T | A | T    | T |
| 10901 | rs3717752   | 8 | 14812378 | A | A | A | C | A    | A |
| 10902 | rs3655271   | 8 | 14819873 | G | G | G | A | G    | G |
| 10903 | rs6226916   | 8 | 15192313 | C | A | A | A | A    | A |
| 10904 | rs3660469   | 8 | 15395212 | G | G | G | C | G    | G |
| 10905 | rs6281247   | 8 | 15731163 | A | G | G | G | G    | G |
| 10906 | mCV25230888 | 8 | 16550585 | A | A | A | G | A    | A |
| 10907 | rs3678678   | 8 | 16274597 | A | A | A | G | A    | A |
| 10908 | rs6208963   | 8 | 16298914 | A | C | C | C | C    | C |
| 10909 | mCV25352402 | 8 | 12215023 | A | G | G | G | G    | G |
| 10910 | rs3657963   | 8 | 16576750 | A | A | A | C | A    | A |
| 10911 | rs3725437   | 8 | 16609149 | A | G | G | G | G    | G |
| 10912 | rs3699325   | 8 | 17919280 | G | G | G | A | G    | G |
| 10913 | rs3665513   | 8 | 17966616 | A | A | A | G | A    | A |
| 10914 | rs3705131   | 8 | 18165998 | G | G | G | C | G    | G |
| 10915 | rs6410820   | 8 | 18261727 | A | A | A | A | A    | A |
| 10916 | rs3090143   | 8 | 18394567 | C | C | C | C | C    | C |
| 10917 | mCV24845756 | 8 | 19147703 | C | C | C | A | C    | C |
| 10918 | mCV24847817 | 8 | 19206695 | A | A | A | C | A    | A |
| 10919 | rs3699118   | 8 | 19119911 | A | A | A | G | A    | A |
| 10920 | rs3695658   | 8 | 19125950 | G | G | G | A | G    | G |
| 10921 | rs6221216   | 8 | 19594472 | G | G | G | G | G    | G |
| 10922 | rs3686014   | 8 | 19828245 | C | C | C | G | C    | C |
| 10923 | rs4227054   | 8 | 20547790 | G | G | G | G | G    | G |
| 10924 | rs4227066   | 8 | 20548027 | G | G | G | A | G    | G |
| 10925 | rs6228462   | 8 | 21136552 | A | A | A | A | A    | A |
| 10926 | rs4140004   | 8 | 21285113 | A | A | A | G | A    | A |
| 10927 | rs3705229   | 8 | 21315339 | G | G | G | A | G    | G |
| 10928 | rs4227071   | 8 | 21414789 | G | G | G | G | G    | G |
| 10929 | rs3711691   | 8 | 21468709 | A | A | G | A | G    | A |
| 10930 | rs8269665   | 8 | 21536767 | A | A | A | A | A    | A |
| 10931 | rs6287735   | 8 | 21566544 | A | A | A | A | A    | A |
| 10932 | rs3655346   | 8 | 21723470 | G | G | C | G | C    | G |
| 10933 | rs3696265   | 8 | 21758920 | G | G | G | A | G    | G |
| 10934 | rs3666112   | 8 | 21796002 | A | A | G | A | G    | A |
| 10935 | mCV22755363 | 8 | 22618416 | A | G | A | A | A    | G |
| 10936 | rs3661760   | 8 | 22251497 | A | A | A | C | A    | A |
| 10937 | rs4227074   | 8 | 22253086 | A | A | A | A | A    | A |
| 10938 | rs4227075   | 8 | 22253184 | G | G | G | G | G    | G |
| 10939 | rs6366256   | 8 | 22550095 | G | G | G | G | G    | G |
| 10940 | rs2020607   | 8 | 22557353 | G | G | G | G | G    | G |
| 10941 | rs3721201   | 8 | 22661058 | T | T | A | T | A    | T |
| 10942 | rs4227086   | 8 | 23391812 | G | G | G | G | G    | G |
| 10943 | rs4227087   | 8 | 23391937 | A | A | A | A | A    | A |
| 10944 | rs3661957   | 8 | 23641399 | A | G | G | A | G    | G |
| 10945 | rs6391404   | 8 | 23725118 | A | A | A | A | A    | A |
| 10946 | rs4227089   | 8 | 24351832 | A | A | A | A | A    | A |
| 10947 | rs4227090   | 8 | 24351855 | G | G | G | G | G    | G |
| 10948 | rs6348177   | 8 | 24528778 | G | G | G | G | G    | G |
| 10949 | rs4227093   | 8 | 24942242 | G | G | G | G | G    | G |

|       |             |   |          |   |   |   |   |   |   |
|-------|-------------|---|----------|---|---|---|---|---|---|
| 10950 | rs6378439   | 8 | 24988208 | C | C | C | C | C | C |
| 10951 | rs3704385   | 8 | 25083165 | G | G | G | C | G | G |
| 10952 | rs3702973   | 8 | 25220557 | A | A | A | G | A | A |
| 10953 | rs3684644   | 8 | 25367055 | A | A | A | G | A | A |
| 10954 | rs6346909   | 8 | 25702077 | A | A | A | A | A | A |
| 10955 | rs6198867   | 8 | 26599226 | A | A | A | A | A | A |
| 10956 | rs3709090   | 8 | 27016024 | A | A | G | A | G | A |
| 10957 | rs3679832   | 8 | 27020091 | A | A | T | A | T | A |
| 10958 | rs6194373   | 8 | 27730214 | A | A | A | A | A | A |
| 10959 | rs6403485   | 8 | 27994883 | G | G | G | G | G | G |
| 10960 | rs6187823   | 8 | 28671621 | G | G | G | A | G | G |
| 10961 | rs3724636   | 8 | 28824777 | G | G | G | A | G | G |
| 10962 | rs3691295   | 8 | 28971300 | A | A | A | G | A | A |
| 10963 | mCV24506226 | 8 | 29576238 | A | A | A | G | A | A |
| 10964 | rs6339455   | 8 | 29428902 | C | C | C | A | C | C |
| 10965 | rs3658700   | 8 | 29792667 | A | A | A | T | A | A |
| 10966 | rs3672582   | 8 | 29823248 | C | C | C | A | C | C |
| 10967 | rs4227097   | 8 | 30204777 | G | G | G | G | G | G |
| 10968 | rs4227096   | 8 | 30204827 | C | C | C | A | C | C |
| 10969 | rs6156151   | 8 | 30259771 | G | G | G | A | G | G |
| 10970 | mCV24495398 | 8 | 31061779 | A | G | G | A | G | G |
| 10971 | rs6391183   | 8 | 30604724 | G | G | A | A | A | G |
| 10972 | rs3668545   | 8 | 30639980 | A | A | A | T | A | A |
| 10973 | rs3706948   | 8 | 30816540 | A | A | A | G | A | A |
| 10974 | rs3684114   | 8 | 30877798 | G | G | A | G | A | G |
| 10975 | rs6166471   | 8 | 31477644 | G | A | A | G | A | A |
| 10976 | rs6183691   | 8 | 31711608 | G | G | G | G | G | G |
| 10977 | rs3680402   | 8 | 31779641 | G | G | G | A | G | G |
| 10978 | rs3670299   | 8 | 31783103 | A | G | G | G | G | G |
| 10979 | rs6276917   | 8 | 32071364 | G | A | A | A | A | A |
| 10980 | rs3677050   | 8 | 32350946 | A | A | A | G | A | A |
| 10981 | rs3697344   | 8 | 32482925 | A | A | A | G | A | A |
| 10982 | rs3669323   | 8 | 32373639 | A | G | G | A | G | G |
| 10983 | rs4227112   | 8 | 32537499 | G | G | G | A | G | G |
| 10984 | rs3725269   | 8 | 32785897 | G | G | G | A | G | A |
| 10985 | rs3678769   | 8 | 33055927 | A | A | A | G | A | G |
| 10986 | rs3665640   | 8 | 33212528 | A | A | A | G | A | G |
| 10987 | rs6182243   | 8 | 33268537 | A | A | A | G | A | G |
| 10988 | rs3023184   | 8 | 33387296 | G | G | G | A | G | A |
| 10989 | rs3088855   | 8 | 33387325 | G | G | G | G | G | G |
| 10990 | rs3694068   | 8 | 33507144 | A | T | T | A | T | A |
| 10991 | rs6361982   | 8 | 33545878 | G | G | G | G | G | G |
| 10992 | rs3726395   | 8 | 34047097 | C | C | C | G | C | G |
| 10993 | rs3679748   | 8 | 34085485 | G | G | G | A | G | A |
| 10994 | rs3675407   | 8 | 34294637 | C | C | C | G | C | G |
| 10995 | rs3726003   | 8 | 34309104 | A | A | A | G | A | G |
| 10996 | rs6412537   | 8 | 34355884 | C | C | C | C | C | C |
| 10997 | rs3689728   | 8 | 34422795 | A | A | A | G | A | A |
| 10998 | rs3714217   | 8 | 34774983 | G | G | G | A | G | G |
| 10999 | rs3665028   | 8 | 35164032 | G | G | G | A | G | G |
| 11000 | rs6298769   | 8 | 35257726 | G | G | G | A | G | G |
| 11001 | rs3725424   | 8 | 35299440 | C | C | C | A | C | C |
| 11002 | rs3678454   | 8 | 35434074 | A | A | A | G | A | A |
| 11003 | rs3657597   | 8 | 35479629 | A | A | A | G | A | A |
| 11004 | rs3697917   | 8 | 35497666 | A | A | A | G | A | A |
| 11005 | rs3672158   | 8 | 35519801 | G | G | G | A | G | G |
| 11006 | rs3654540   | 8 | 35567409 | A | A | A | C | A | A |
| 11007 | rs3709888   | 8 | 35752542 | A | A | A | G | A | A |
| 11008 | rs3697360   | 8 | 36452744 | G | G | G | A | G | G |
| 11009 | rs3671902   | 8 | 36561898 | G | G | G | A | G | G |
| 11010 | rs6347708   | 8 | 36602239 | G | G | G | A | G | G |
| 11011 | rs3672173   | 8 | 36943681 | G | G | G | A | G | G |
| 11012 | rs6232107   | 8 | 37264576 | C | C | C | G | C | C |
| 11013 | rs3724402   | 8 | 37307650 | A | A | A | G | A | A |
| 11014 | rs3667738   | 8 | 37536463 | A | A | A | T | A | A |
| 11015 | rs6305076   | 8 | 37605157 | A | A | A | G | A | A |
| 11016 | rs4139770   | 8 | 37776134 | G | G | G | A | G | G |
| 11017 | rs3670150   | 8 | 38146422 | G | G | G | A | G | G |
| 11018 | rs3716806   | 8 | 38325760 | G | G | G | A | G | G |
| 11019 | rs3657016   | 8 | 38395086 | A | A | A | G | A | A |
| 11020 | rs6217381   | 8 | 38694587 | A | A | A | G | A | A |
| 11021 | rs4227117   | 8 | 38690693 | A | A | A | G | A | A |
| 11022 | rs4227123   | 8 | 38690516 | A | A | A | A | A | A |
| 11023 | rs3089412   | 8 | 38716730 | G | G | G | G | G | G |

|       |             |   |          |   |   |   |   |   |   |
|-------|-------------|---|----------|---|---|---|---|---|---|
| 11024 | rs6398885   | 8 | 38906934 | A | A | A | G | A | A |
| 11025 | rs3720486   | 8 | 39226053 | A | A | A | G | A | A |
| 11026 | rs3698365   | 8 | 39339806 | G | G | G | C | G | G |
| 11027 | rs3674647   | 8 | 39442455 | A | A | A | C | A | A |
| 11028 | rs4227127   | 8 | 39662970 | G | G | G | A | G | G |
| 11029 | rs3703811   | 8 | 39770568 | A | A | A | G | A | A |
| 11030 | rs4227131   | 8 | 40028723 | A | A | A | A | A | A |
| 11031 | rs4227132   | 8 | 40028790 | C | C | C | A | C | C |
| 11032 | rs3715224   | 8 | 40179673 | A | A | A | G | A | A |
| 11033 | rs3692809   | 8 | 40290463 | G | G | G | A | G | G |
| 11034 | rs3696853   | 8 | 40364763 | A | A | A | G | A | A |
| 11035 | rs3685490   | 8 | 40368042 | A | A | A | G | A | A |
| 11036 | rs3663650   | 8 | 40997867 | G | G | A | A | A | G |
| 11037 | rs3706426   | 8 | 41123342 | G | G | A | A | A | G |
| 11038 | rs3711035   | 8 | 41215138 | C | C | A | A | A | C |
| 11039 | rs6270271   | 8 | 41732262 | G | G | G | G | G | G |
| 11040 | rs3672546   | 8 | 41899636 | G | G | A | A | A | G |
| 11041 | rs6298886   | 8 | 42076089 | G | G | G | G | G | G |
| 11042 | rs3666140   | 8 | 42081791 | G | G | A | A | A | G |
| 11043 | rs6393796   | 8 | 42139626 | A | A | C | C | C | A |
| 11044 | mCV24436061 | 8 | 42479218 | A | A | G | G | G | A |
| 11045 | rs3725540   | 8 | 42498907 | T | T | T | A | T | T |
| 11046 | mCV24778752 | 8 | 42731622 | G | G | G | G | G | G |
| 11047 | rs6221022   | 8 | 43227116 | A | A | A | A | A | A |
| 11048 | rs6332019   | 8 | 43967468 | A | A | A | A | A | A |
| 11049 | rs6164599   | 8 | 44397128 | G | G | G | G | G | G |
| 11050 | rs8272033   | 8 | 44406052 | A | A | A | A | A | A |
| 11051 | rs8272116   | 8 | 44420853 | A | A | A | A | A | A |
| 11052 | rs8271871   | 8 | 44437204 | C | C | C | C | C | C |
| 11053 | rs6403404   | 8 | 44573120 | G | G | G | G | G | G |
| 11054 | rs4227148   | 8 | 45042177 | A | A | A | A | A | A |
| 11055 | rs4227149   | 8 | 45042248 | A | A | A | A | A | A |
| 11056 | rs6341458   | 8 | 45074802 | G | A | A | A | A | A |
| 11057 | rs3691123   | 8 | 45421242 | A | G | G | G | G | G |
| 11058 | rs3662336   | 8 | 45458816 | G | A | A | A | A | A |
| 11059 | rs6327437   | 8 | 45931707 | A | G | G | G | G | G |
| 11060 | rs3673554   | 8 | 46328232 | G | A | A | A | A | A |
| 11061 | rs3725083   | 8 | 46788083 | A | T | T | T | T | A |
| 11062 | rs3694071   | 8 | 47033579 | A | G | G | G | G | G |
| 11063 | rs6218480   | 8 | 47853957 | A | T | T | T | T | A |
| 11064 | rs3724820   | 8 | 47920080 | T | A | A | A | A | T |
| 11065 | rs3720150   | 8 | 48154076 | C | A | A | A | A | C |
| 11066 | rs6285908   | 8 | 48354052 | G | A | A | A | A | G |
| 11067 | rs6322353   | 8 | 48356168 | G | G | G | G | G | G |
| 11068 | rs3719401   | 8 | 48804736 | A | G | G | G | G | A |
| 11069 | rs4136613   | 8 | 48958389 | G | G | A | A | A | G |
| 11070 | rs6409915   | 8 | 49016433 | G | G | A | A | A | G |
| 11071 | rs6360429   | 8 | 49945882 | A | A | A | A | A | A |
| 11072 | rs3697959   | 8 | 50000714 | G | G | A | A | A | G |
| 11073 | rs3088450   | 8 | 50650209 | A | A | C | C | C | A |
| 11074 | rs6268002   | 8 | 50835330 | G | G | G | G | G | G |
| 11075 | rs6269038   | 8 | 50835524 | C | C | C | C | C | C |
| 11076 | rs6228197   | 8 | 51706476 | G | G | G | G | G | G |
| 11077 | rs6231930   | 8 | 52166690 | G | G | A | A | A | A |
| 11078 | rs4227159   | 8 | 52696704 | A | A | A | A | A | A |
| 11079 | mCV24479810 | 8 | 53447892 | A | A | G | G | G | A |
| 11080 | rs3661488   | 8 | 53330452 | A | A | G | G | G | A |
| 11081 | rs3687648   | 8 | 53997362 | A | A | G | G | G | G |
| 11082 | rs6282113   | 8 | 54257227 | G | G | G | G | G | G |
| 11083 | rs3712458   | 8 | 54497079 | A | A | G | G | G | A |
| 11084 | rs3659789   | 8 | 54813320 | G | G | G | A | G | G |
| 11085 | rs6260693   | 8 | 54903858 | G | G | G | G | G | G |
| 11086 | rs6168647   | 8 | 54965220 | G | G | A | G | A | A |
| 11087 | rs6292169   | 8 | 55245979 | G | G | C | C | C | C |
| 11088 | rs3663761   | 8 | 55465097 | A | A | C | A | C | C |
| 11089 | rs3677675   | 8 | 55473057 | A | A | G | A | G | G |
| 11090 | rs3659366   | 8 | 55477724 | A | A | G | G | G | G |
| 11091 | mCV23056731 | 8 | 55932578 | G | G | A | G | A | A |
| 11092 | mCV22562218 | 8 | 55939656 | A | A | G | G | G | G |
| 11093 | rs3657344   | 8 | 56115378 | A | A | A | G | A | A |
| 11094 | rs3725286   | 8 | 56141367 | A | A | G | G | G | G |
| 11095 | rs6399377   | 8 | 56487610 | A | A | A | G | A | A |
| 11096 | rs3685424   | 8 | 56548348 | G | G | A | G | A | A |
| 11097 | rs6213025   | 8 | 56852761 | A | A | A | T | A | A |

|       |             |   |           |   |   |   |   |   |   |
|-------|-------------|---|-----------|---|---|---|---|---|---|
| 11098 | rs6213640   | 8 | 56852914  | G | G | A | A | A | A |
| 11099 | rs3726882   | 8 | 57042211  | A | A | G | A | G | G |
| 11100 | rs3679638   | 8 | 57141863  | G | G | G | A | G | G |
| 11101 | rs3088776   | 8 | 57456830  | G | G | G | G | G | G |
| 11102 | rs3719788   | 8 | 57542263  | G | G | A | G | A | A |
| 11103 | rs3707439   | 8 | 57724335  | G | G | A | G | A | A |
| 11104 | rs6351975   | 8 | 57941116  | G | G | A | G | A | A |
| 11105 | rs3726906   | 8 | 58201849  | G | G | A | G | A | A |
| 11106 | rs6398181   | 8 | 59013332  | A | G | A | A | G | G |
| 11107 | rs3088732   | 8 | 59026354  | T | T | T | T | T | T |
| 11108 | rs3704301   | 8 | 59074714  | C | C | A | A | A | A |
| 11109 | rs6173355   | 8 | 59086266  | A | A | G | G | G | G |
| 11110 | rs3672639   | 8 | 60120308  | G | A | A | G | A | A |
| 11111 | rs6370413   | 8 | 60430582  | C | A | C | C | C | C |
| 11112 | rs3717251   | 8 | 60527867  | A | A | G | A | G | G |
| 11113 | rs3657679   | 8 | 60737399  | G | G | C | G | C | C |
| 11114 | rs3693121   | 8 | 60745152  | T | T | A | T | A | A |
| 11115 | mCV24047460 | 8 | 61454022  | G | C | C | G | C | C |
| 11116 | rs6394046   | 8 | 61422061  | G | A | A | G | A | A |
| 11117 | rs3680085   | 8 | 61676838  | A | G | G | A | G | G |
| 11118 | mCV22586111 | 8 | 62269806  | T | A | A | T | A | T |
| 11119 | rs3659852   | 8 | 62164881  | A | A | T | A | T | A |
| 11120 | rs6297611   | 8 | 62194889  | A | A | G | A | G | A |
| 11121 | rs3720114   | 8 | 62369674  | A | A | T | A | T | A |
| 11122 | rs3667255   | 8 | 62920755  | A | A | A | A | G | A |
| 11123 | rs3674032   | 8 | 63286008  | G | A | A | G | A | G |
| 11124 | rs4227189   | 8 | 63518254  | T | A | A | T | A | T |
| 11125 | rs4227185   | 8 | 63518415  | G | G | G | G | G | G |
| 11126 | rs3700097   | 8 | 63977744  | T | T | A | T | A | T |
| 11127 | mCV23853440 | 8 | 64520889  | A | G | G | A | G | A |
| 11128 | rs3697988   | 8 | 64390408  | A | A | G | A | G | A |
| 11129 | rs3703096   | 8 | 64394119  | A | G | G | A | G | A |
| 11130 | rs6314247   | 8 | 65135750  | G | A | G | G | G | G |
| 11131 | rs3712611   | 8 | 65261034  | A | G | G | A | G | G |
| 11132 | rs6182473   | 8 | 65599937  | T | A | T | T | T | T |
| 11133 | rs8238643   | 8 | 65662099  | A | A | A | A | A | A |
| 11134 | rs8238642   | 8 | 65662571  | A | A | A | A | A | A |
| 11135 | mCV24841004 | 8 | 66689813  | A | G | A | A | A | A |
| 11136 | rs8236724   | 8 | 66478381  | A | A | A | A | A | A |
| 11137 | rs8254797   | 8 | 66485171  | A | A | A | A | A | A |
| 11138 | rs8254800   | 8 | 66485350  | T | A | T | T | T | T |
| 11139 | mCV23008156 | 8 | 67317447  | A | G | G | G | G | A |
| 11140 | mCV23008166 | 8 | 67321458  | A | G | G | A | G | A |
| 11141 | mCV23008211 | 8 | 67323221  | A | T | T | T | T | A |
| 11142 | mCV23008401 | 8 | 67323949  | A | G | G | G | G | A |
| 11143 | mCV23008402 | 8 | 67324026  | G | A | A | A | A | G |
| 11144 | mCV22725457 | 6 | 109145289 | T | T | T | T | A | T |
| 11145 | mCV22725447 | 6 | 109145141 | G | G | G | G | A | G |
| 11146 | mCV24403642 | 8 | 67331933  | G | G | G | A | G | G |
| 11147 | mCV24403652 | 8 | 67332220  | A | A | A | C | A | A |
| 11148 | mCV24403653 | 8 | 67332378  | G | G | G | A | G | G |
| 11149 | mCV24403664 | 8 | 67332960  | A | A | A | G | A | A |
| 11150 | mCV24403665 | 8 | 67333222  | T | A | A | T | A | T |
| 11151 | mCV24403666 | 8 | 67333685  | A | G | G | A | G | A |
| 11152 | mCV24403936 | 8 | 67333735  | G | A | A | G | A | G |
| 11153 | mCV24403950 | 8 | 67334009  | A | G | G | A | G | A |
| 11154 | mCV24403961 | 8 | 67334658  | G | G | G | A | G | G |
| 11155 | mCV24403972 | 8 | 67335227  | A | C | C | C | C | A |
| 11156 | mCV24403973 | 8 | 67335269  | A | A | A | G | A | A |
| 11157 | mCV24403974 | 8 | 67335419  | G | A | A | G | A | G |
| 11158 | mCV24403984 | 8 | 67856331  | A | G | G | A | G | A |
| 11159 | mCV24403986 | 8 | 67337807  | C | A | A | A | A | C |
| 11160 | mCV24403995 | 8 | 67338007  | C | C | C | A | C | C |
| 11161 | mCV24403996 | 8 | 67338342  | A | G | G | G | G | A |
| 11162 | mCV24404008 | 8 | 67338897  | A | A | A | C | A | A |
| 11163 | mCV24404280 | 8 | 67339468  | A | A | A | G | A | A |
| 11164 | mCV24404294 | 8 | 67863486  | G | G | G | A | G | G |
| 11165 | mCV24404306 | 8 | 67347408  | A | G | G | A | G | A |
| 11166 | mCV24404316 | 8 | 67347492  | C | C | C | A | C | C |
| 11167 | mCV24404317 | 8 | 67347861  | A | G | G | A | G | A |
| 11168 | mCV24404318 | 8 | 67348088  | G | G | G | A | G | G |
| 11169 | mCV24404329 | 8 | 67348864  | A | G | G | A | G | A |
| 11170 | mCV24404339 | 8 | 67351946  | G | A | A | A | A | G |
| 11171 | mCV24404340 | 8 | 67351968  | A | G | G | G | G | A |

|       |             |   |          |   |   |   |   |   |   |
|-------|-------------|---|----------|---|---|---|---|---|---|
| 11172 | mCV24793580 | 8 | 67354429 | A | G | G | A | G | A |
| 11173 | mCV22531912 | 8 | 67358786 | A | C | C | C | C | A |
| 11174 | mCV22531922 | 8 | 67358939 | A | G | G | G | G | A |
| 11175 | mCV22531923 | 8 | 67359074 | G | A | A | A | A | G |
| 11176 | mCV22531946 | 8 | 67359331 | A | G | G | G | G | A |
| 11177 | mCV22532220 | 8 | 67878817 | A | T | T | T | T | A |
| 11178 | mCV22532221 | 8 | 67878822 | A | G | G | G | G | A |
| 11179 | mCV25342743 | 8 | 67361740 | C | G | G | C | G | C |
| 11180 | mCV25342756 | 8 | 67361826 | C | G | G | G | G | C |
| 11181 | mCV25342767 | 8 | 67362308 | G | G | G | A | G | G |
| 11182 | mCV25342768 | 8 | 67363264 | A | G | G | G | G | A |
| 11183 | mCV25342954 | 8 | 67883462 | G | A | A | A | A | G |
| 11184 | mCV25342955 | 8 | 67364446 | G | A | A | A | A | G |
| 11185 | mCV25342967 | 8 | 67365021 | C | A | A | A | A | C |
| 11186 | mCV25342977 | 8 | 67365121 | G | A | A | A | A | G |
| 11187 | mCV25342978 | 8 | 67365287 | A | G | G | G | G | A |
| 11188 | mCV25342979 | 8 | 67365729 | G | A | A | G | A | G |
| 11189 | mCV25342990 | 8 | 67366088 | A | G | G | G | G | A |
| 11190 | mCV25342991 | 8 | 67366360 | A | G | G | A | G | A |
| 11191 | mCV25343003 | 8 | 67366446 | G | A | A | A | A | G |
| 11192 | mCV25343014 | 8 | 67366638 | C | A | A | C | A | C |
| 11193 | mCV25343211 | 8 | 67368070 | A | C | C | A | C | A |
| 11194 | mCV25343212 | 8 | 67368177 | A | G | G | A | G | A |
| 11195 | mCV25343223 | 8 | 67887718 | A | C | C | A | C | A |
| 11196 | mCV25343225 | 8 | 67369350 | A | A | A | G | A | A |
| 11197 | mCV25343236 | 8 | 67372492 | G | G | G | A | G | G |
| 11198 | mCV25343247 | 8 | 67372625 | A | G | G | A | G | A |
| 11199 | mCV25343248 | 8 | 67372798 | G | A | A | G | A | G |
| 11200 | mCV25343249 | 8 | 67373869 | A | G | G | A | G | A |
| 11201 | mCV25343256 | 8 | 67373925 | A | G | G | A | G | A |
| 11202 | mCV25343258 | 8 | 67374260 | G | A | A | G | A | G |
| 11203 | rs6259892   | 8 | 66925554 | G | G | G | G | G | G |
| 11204 | rs3702472   | 8 | 67113287 | A | A | A | G | A | A |
| 11205 | rs3089890   | 8 | 67188718 | G | G | G | G | G | G |
| 11206 | rs3656875   | 8 | 67222604 | G | G | G | A | G | G |
| 11207 | rs3658748   | 8 | 67237674 | C | C | C | G | C | C |
| 11208 | rs3720418   | 8 | 67240740 | A | A | A | G | A | A |
| 11209 | rs6402928   | 8 | 67246476 | T | T | T | A | T | T |
| 11210 | rs6155902   | 8 | 67321031 | C | C | C | C | C | C |
| 11211 | rs6156473   | 8 | 67321145 | G | G | G | G | G | G |
| 11212 | rs6156951   | 8 | 67321208 | A | A | A | A | A | A |
| 11213 | rs6310665   | 8 | 67335470 | G | G | G | G | G | G |
| 11214 | rs6311211   | 8 | 67335572 | A | A | A | A | A | A |
| 11215 | rs6312291   | 8 | 67335784 | A | A | A | G | A | A |
| 11216 | rs6228248   | 8 | 67363511 | G | G | G | G | G | G |
| 11217 | rs6361420   | 8 | 67382884 | G | G | G | A | G | G |
| 11218 | rs3089636   | 8 | 67756889 | G | G | G | A | G | G |
| 11219 | rs8253516   | 8 | 67908410 | A | A | A | G | A | A |
| 11220 | rs6268167   | 8 | 67908683 | A | A | A | T | A | A |
| 11221 | rs3681089   | 8 | 67920720 | G | G | G | A | G | G |
| 11222 | mCV24409492 | 8 | 68381512 | A | C | A | C | A | A |
| 11223 | mCV24421661 | 8 | 68865520 | G | A | G | A | G | G |
| 11224 | mCV24421662 | 8 | 68865600 | A | G | A | G | A | A |
| 11225 | mCV24421673 | 8 | 68866239 | G | A | G | A | G | G |
| 11226 | mCV24421685 | 8 | 68868940 | A | C | A | C | A | A |
| 11227 | mCV24421686 | 8 | 68868948 | A | A | A | G | A | A |
| 11228 | mCV24421698 | 8 | 68872092 | G | G | G | A | G | G |
| 11229 | mCV24421699 | 8 | 68872162 | G | A | G | A | G | G |
| 11230 | mCV24421735 | 8 | 68874838 | A | G | A | G | A | A |
| 11231 | mCV24422006 | 8 | 69390645 | A | G | A | G | A | A |
| 11232 | mCV24422007 | 8 | 68875365 | C | G | C | G | C | C |
| 11233 | mCV24422017 | 8 | 68875533 | A | G | A | G | A | A |
| 11234 | mCV24657217 | 8 | 68876395 | G | A | G | A | G | G |
| 11235 | mCV24657226 | 8 | 68876496 | A | C | A | C | A | A |
| 11236 | mCV22527651 | 8 | 68869236 | A | G | A | G | A | A |
| 11237 | mCV22527661 | 8 | 68869262 | G | A | G | A | G | G |
| 11238 | mCV22619744 | 8 | 68877647 | A | G | A | G | A | A |
| 11239 | mCV22619745 | 8 | 68877882 | C | A | C | A | C | C |
| 11240 | mCV22619752 | 8 | 68878266 | G | A | G | A | G | G |
| 11241 | mCV22619754 | 8 | 68878699 | A | G | A | G | A | A |
| 11242 | mCV22619781 | 8 | 68880128 | A | G | A | G | A | A |
| 11243 | mCV22619789 | 8 | 68880168 | G | A | G | A | G | G |
| 11244 | mCV22620057 | 8 | 68880316 | A | G | A | G | A | A |
| 11245 | mCV22620059 | 8 | 68881115 | C | G | C | G | C | C |



|       |             |   |          |   |     |   |   |   |   |
|-------|-------------|---|----------|---|-----|---|---|---|---|
| 11246 | mCV22620066 | 8 | 68881254 | C | G   | C | G | C | C |
| 11247 | mCV22620067 | 8 | 68881604 | G | A   | G | A | G | G |
| 11248 | mCV22620068 | 8 | 68881785 | G | A   | G | A | G | G |
| 11249 | mCV22620075 | 8 | 68882508 | G | A   | G | A | G | G |
| 11250 | mCV22620077 | 8 | 68882809 | A | C   | A | C | A | A |
| 11251 | mCV22620084 | 8 | 68882872 | A | G   | A | G | A | A |
| 11252 | mCV22620086 | 8 | 68884264 | A | A/C | A | C | A | A |
| 11253 | mCV22620093 | 8 | 68884711 | T | A   | T | A | T | T |
| 11254 | mCV22620103 | 8 | 69410452 | A | G   | A | G | A | A |
| 11255 | mCV22620104 | 8 | 68886159 | A | G   | A | G | A | A |
| 11256 | mCV22620111 | 8 | 68886420 | G | A   | G | A | G | G |
| 11257 | mCV22620112 | 8 | 68886589 | A | G   | A | G | A | A |
| 11258 | mCV22620129 | 8 | 68887137 | A | G   | A | G | A | A |
| 11259 | mCV22620130 | 8 | 68887192 | G | A   | G | A | G | G |
| 11260 | mCV22620131 | 8 | 68887219 | A | G   | A | G | A | A |
| 11261 | mCV22620138 | 8 | 68887315 | G | A   | G | A | G | G |
| 11262 | mCV22675711 | 8 | 68889566 | G | A   | G | A | G | G |
| 11263 | mCV22675710 | 8 | 68889567 | A | G   | A | G | A | A |
| 11264 | mCV22675700 | 8 | 68889669 | G | A   | G | A | G | G |
| 11265 | mCV22675676 | 8 | 68890206 | G | A   | G | A | G | G |
| 11266 | mCV22675666 | 8 | 68890603 | G | A   | G | A | G | G |
| 11267 | mCV22675665 | 8 | 68890873 | A | G   | A | G | A | A |
| 11268 | mCV22675664 | 8 | 68890970 | A | G   | A | G | A | A |
| 11269 | mCV22675478 | 8 | 68891100 | G | A   | G | A | G | G |
| 11270 | mCV22675468 | 8 | 68891268 | G | A   | G | A | G | G |
| 11271 | mCV22675467 | 8 | 68891301 | G | A   | G | A | G | G |
| 11272 | mCV22675443 | 8 | 68894298 | A | G   | A | G | A | A |
| 11273 | mCV22675433 | 8 | 68895325 | C | G   | C | G | C | C |
| 11274 | mCV22675431 | 8 | 68895614 | A | G   | A | G | A | A |
| 11275 | mCV22675420 | 8 | 68895780 | A | G   | A | G | A | A |
| 11276 | mCV22675211 | 8 | 68899558 | A | G   | A | G | A | A |
| 11277 | mCV22675210 | 8 | 68899690 | A | T   | A | T | A | A |
| 11278 | mCV22675200 | 8 | 68900079 | C | A   | C | A | C | C |
| 11279 | mCV22675176 | 8 | 68901194 | C | G   | C | G | C | C |
| 11280 | mCV22675175 | 8 | 69428179 | A | C   | A | C | A | A |
| 11281 | mCV22675140 | 8 | 68902907 | A | C   | A | C | A | A |
| 11282 | mCV22675139 | 8 | 68902924 | G | G   | G | G | G | G |
| 11283 | mCV22674941 | 8 | 68903379 | G | A   | G | A | G | G |
| 11284 | mCV22674940 | 8 | 68904093 | A | G   | A | G | A | A |
| 11285 | mCV22674930 | 8 | 68904288 | A | G   | A | G | A | A |
| 11286 | mCV22674929 | 8 | 68904587 | A | G   | A | G | A | A |
| 11287 | mCV22674916 | 8 | 68905002 | A | G   | A | G | A | A |
| 11288 | mCV22674905 | 8 | 68905545 | C | G   | C | G | C | C |
| 11289 | mCV22674894 | 8 | 68906132 | A | G   | A | G | A | A |
| 11290 | mCV22674893 | 8 | 68906223 | G | A   | G | A | G | G |
| 11291 | mCV22674884 | 8 | 69432014 | A | G   | A | G | A | A |
| 11292 | mCV22674883 | 8 | 68906703 | A | G   | A | G | A | A |
| 11293 | mCV27580773 | 8 | 69449677 | G | A   | G | A | G | G |
| 11294 | rs3699406   | 8 | 68996069 | A | G   | A | G | A | A |
| 11295 | rs3676851   | 8 | 69021497 | A | G   | A | G | A | A |
| 11296 | rs8237356   | 8 | 69175297 | G | A   | G | A | G | G |
| 11297 | rs4227221   | 8 | 69184037 | G | C   | G | C | G | G |
| 11298 | rs8254473   | 8 | 69202237 | A | A   | A | A | A | A |
| 11299 | rs6340562   | 8 | 69216156 | G | A   | G | A | G | G |
| 11300 | rs4227232   | 8 | 69217058 | A | A   | A | A | A | A |
| 11301 | rs3703501   | 8 | 69598472 | G | A   | G | A | G | G |
| 11302 | rs3711099   | 8 | 69821100 | G | A   | G | A | G | G |
| 11303 | mCV22907805 | 8 | 70043222 | A | C   | A | C | A | A |
| 11304 | rs8236355   | 8 | 70602288 | G | G   | G | G | G | G |
| 11305 | rs8262736   | 8 | 70618545 | G | A   | G | A | G | G |
| 11306 | rs8262738   | 8 | 70618891 | A | C   | A | C | A | A |
| 11307 | rs8262739   | 8 | 70619123 | C | G   | C | G | C | C |
| 11308 | rs3667475   | 8 | 70497527 | A | G   | A | G | A | A |
| 11309 | rs3685305   | 8 | 70778450 | C | A   | C | A | C | C |
| 11310 | mCV22939086 | 8 | 82437274 | A | A   | A | G | A | G |
| 11311 | rs3718046   | 8 | 71471329 | A | T   | A | T | A | A |
| 11312 | rs3722665   | 8 | 71579125 | A | C   | A | C | A | A |
| 11313 | rs6296189   | 8 | 71681119 | C | A   | C | A | C | C |
| 11314 | rs4227251   | 8 | 71872034 | G | G   | G | G | G | G |
| 11315 | rs3160730   | 8 | 72212224 | G | A   | G | A | G | G |
| 11316 | rs3683363   | 8 | 72604785 | A | C   | A | C | A | A |
| 11317 | rs3688799   | 8 | 73488340 | G | A   | G | A | G | G |
| 11318 | rs3694714   | 8 | 73492080 | A | G   | A | G | A | A |
| 11319 | rs3722188   | 8 | 73606592 | C | G   | C | G | C | C |

|       |             |   |          |   |   |   |   |   |   |
|-------|-------------|---|----------|---|---|---|---|---|---|
| 11320 | rs3691327   | 8 | 73743983 | G | A | G | A | G | G |
| 11321 | rs3089702   | 8 | 73894659 | A | A | A | A | A | A |
| 11322 | rs4227253   | 8 | 74193741 | G | A | G | A | G | A |
| 11323 | rs4227254   | 8 | 74193772 | C | C | C | C | C | C |
| 11324 | rs4227259   | 8 | 74194025 | C | C | C | C | C | C |
| 11325 | rs6251877   | 8 | 74345571 | A | C | C | C | A | A |
| 11326 | mCV24026034 | 8 | 73802705 | C | G | C | G | C | C |
| 11327 | rs3696502   | 8 | 74806749 | A | G | G | G | A | G |
| 11328 | rs6300672   | 8 | 74926925 | G | G | G | G | G | G |
| 11329 | rs3722655   | 8 | 75561792 | A | G | G | G | A | G |
| 11330 | rs3658934   | 8 | 75747842 | A | T | T | A | A | T |
| 11331 | rs3676644   | 8 | 75949930 | G | A | A | G | G | G |
| 11332 | rs6284963   | 8 | 75962184 | A | T | T | A | A | A |
| 11333 | rs3690549   | 8 | 76126530 | C | A | A | C | C | A |
| 11334 | rs4136401   | 8 | 76711806 | A | T | T | A | A | A |
| 11335 | rs3698093   | 8 | 77144203 | A | A | G | A | A | A |
| 11336 | rs6228528   | 8 | 77354995 | G | G | G | G | G | G |
| 11337 | rs6266968   | 8 | 77547523 | A | A | A | A | A | A |
| 11338 | rs3090466   | 8 | 77856643 | G | G | G | G | G | G |
| 11339 | rs6174248   | 8 | 77879581 | G | G | G | G | G | G |
| 11340 | rs4227270   | 8 | 78836461 | A | A | A | A | A | A |
| 11341 | rs6356701   | 8 | 79089379 | A | A | A | A | A | G |
| 11342 | rs6296891   | 8 | 79152010 | C | C | G | C | C | G |
| 11343 | rs6352185   | 8 | 79350831 | A | A | A | A | A | G |
| 11344 | rs3088545   | 8 | 79613809 | A | A | A | A | A | A |
| 11345 | rs3719174   | 8 | 80049591 | G | G | G | A | G | A |
| 11346 | rs4227272   | 8 | 80165642 | C | C | C | C | C | C |
| 11347 | rs3696786   | 8 | 80182161 | G | G | G | A | G | A |
| 11348 | rs6342663   | 8 | 80713272 | G | G | G | A | G | A |
| 11349 | rs3662744   | 8 | 81054294 | G | G | G | A | G | A |
| 11350 | mCV24159008 | 8 | 80854257 | T | A | A | T | A | T |
| 11351 | rs3679284   | 8 | 81362136 | A | A | A | C | A | C |
| 11352 | rs3685476   | 8 | 81508980 | G | G | G | A | G | A |
| 11353 | rs8238240   | 8 | 81586346 | A | A | A | A | A | A |
| 11354 | rs6282422   | 8 | 81613742 | G | G | G | A | G | A |
| 11355 | rs3666835   | 8 | 81707985 | A | A | A | T | A | T |
| 11356 | rs3690145   | 8 | 81773963 | A | A | A | C | A | C |
| 11357 | rs6339346   | 8 | 81778963 | A | A | A | T | A | T |
| 11358 | rs6185205   | 8 | 81947929 | A | A | A | C | A | C |
| 11359 | rs3713940   | 8 | 82154722 | G | G | G | A | G | A |
| 11360 | rs3681482   | 8 | 82548171 | G | G | G | A | G | A |
| 11361 | rs3680975   | 8 | 82555372 | G | G | G | A | G | A |
| 11362 | rs3667484   | 8 | 82690124 | G | G | G | A | G | A |
| 11363 | rs3698182   | 8 | 82852106 | A | A | A | G | A | G |
| 11364 | rs8253610   | 8 | 82933517 | G | G | G | G | G | G |
| 11365 | rs8236751   | 8 | 82934737 | G | G | G | G | G | G |
| 11366 | rs8236770   | 8 | 82939075 | A | A | A | G | A | G |
| 11367 | rs3678433   | 8 | 83216284 | C | C | C | A | C | C |
| 11368 | rs3662136   | 8 | 83412560 | G | G | G | A | G | A |
| 11369 | rs3023193   | 8 | 83995333 | A | A | A | G | A | A |
| 11370 | rs3667288   | 8 | 84028638 | G | G | G | A | G | G |
| 11371 | rs3703660   | 8 | 84540685 | G | G | G | A | G | G |
| 11372 | rs6289238   | 8 | 84599477 | G | G | G | A | G | G |
| 11373 | rs3088578   | 8 | 86361081 | A | A | A | A | A | A |
| 11374 | mCV24195013 | 8 | 84373885 | A | G | G | A | G | G |
| 11375 | rs3700000   | 8 | 86427528 | A | G | G | A | G | G |
| 11376 | rs6257357   | 8 | 84826788 | G | G | G | A | G | G |
| 11377 | rs4227308   | 8 | 84916769 | A | A | A | A | A | A |
| 11378 | rs3700630   | 8 | 84958180 | A | A | A | G | A | A |
| 11379 | rs6364023   | 8 | 85133998 | G | G | G | A | G | G |
| 11380 | rs3669548   | 8 | 85303225 | A | G | G | A | G | G |
| 11381 | rs3023190   | 8 | 86018148 | G | G | G | G | G | G |
| 11382 | rs6257448   | 8 | 86304226 | A | A | A | G | A | A |
| 11383 | rs6258517   | 8 | 86304446 | A | A | A | G | A | A |
| 11384 | rs3724725   | 8 | 86307668 | G | G | G | A | G | G |
| 11385 | rs3702520   | 8 | 86395958 | G | G | G | A | G | G |
| 11386 | rs3700628   | 8 | 86427657 | A | G | G | A | G | G |
| 11387 | rs3682243   | 8 | 86628559 | G | A | A | A | A | A |
| 11388 | rs6186316   | 8 | 86786719 | A | C | C | A | A | A |
| 11389 | rs3724111   | 8 | 87188052 | G | G | G | A | G | G |
| 11390 | mCV24216915 | 8 | 86879639 | A | G | G | G | G | G |
| 11391 | rs6235292   | 8 | 87407229 | A | G | G | A | A | A |
| 11392 | rs6210223   | 8 | 87508784 | A | T | T | A | A | A |
| 11393 | rs3023196   | 8 | 87635378 | G | G | G | G | A | A |

|       |             |   |           |   |   |   |   |   |      |
|-------|-------------|---|-----------|---|---|---|---|---|------|
| 11394 | rs3692662   | 8 | 87665852  | G | A | A | A | G | G    |
| 11395 | rs3023195   | 8 | 87931962  | A | G | G | G | A | A    |
| 11396 | rs3023194   | 8 | 87931984  | A | G | G | G | A | A    |
| 11397 | rs3671185   | 8 | 88256377  | T | A | A | A | T | T    |
| 11398 | rs6296403   | 8 | 88390960  | G | A | A | A | G | G    |
| 11399 | mCV23424980 | 8 | 88630036  | G | C | C | C | G | G    |
| 11400 | rs3675233   | 8 | 89067207  | G | A | A | A | G | G    |
| 11401 | rs3662700   | 8 | 89109076  | G | A | A | A | G | G    |
| 11402 | rs6391152   | 8 | 89169668  | C | A | A | A | C | C    |
| 11403 | rs6228937   | 8 | 89335906  | G | G | G | G | G | G    |
| 11404 | rs3654658   | 8 | 89662188  | A | G | G | G | A | A    |
| 11405 | rs3672711   | 8 | 89802934  | A | G | G | G | A | A    |
| 11406 | rs6403541   | 8 | 89986060  | G | C | C | C | G | G    |
| 11407 | rs3702969   | 8 | 89987673  | A | G | G | G | A | A    |
| 11408 | rs4227313   | 8 | 90433691  | G | A | A | A | G | G    |
| 11409 | rs4227318   | 8 | 90433975  | G | G | G | G | G | G    |
| 11410 | rs3677073   | 8 | 90989055  | A | T | T | T | A | A    |
| 11411 | rs6316991   | 8 | 91265861  | G | A | A | A | G | G    |
| 11412 | rs3655980   | 8 | 91662852  | A | G | G | G | A | A    |
| 11413 | rs6334722   | 8 | 91998007  | C | A | A | A | C | C    |
| 11414 | rs3704645   | 8 | 92253968  | C | C | C | A | C | C    |
| 11415 | rs3023197   | 8 | 92291928  | C | C | C | G | C | C    |
| 11416 | rs8278860   | 8 | 92307242  | G | G | G | G | G | G    |
| 11417 | mCV24938952 | 8 | 92483578  | G | G | G | A | G | G    |
| 11418 | rs4227326   | 8 | 92603173  | A | A | A | A | A | A    |
| 11419 | rs3726239   | 8 | 93016248  | G | A | A | A | A | A    |
| 11420 | rs6357819   | 8 | 93144202  | G | G | G | G | G | NONE |
| 11421 | rs6240783   | 8 | 93690224  | G | G | G | G | G | G    |
| 11422 | rs6373291   | 8 | 93750358  | A | A | A | G | A | A    |
| 11423 | rs4227341   | 8 | 93875013  | T | T | T | T | T | T    |
| 11424 | rs4137596   | 8 | 94037444  | A | G | G | A | G | G    |
| 11425 | rs3696582   | 8 | 94412871  | C | C | C | C | C | C    |
| 11426 | rs3705695   | 8 | 94705690  | A | A | A | G | A | A    |
| 11427 | rs6356426   | 8 | 94792921  | G | G | G | A | G | G    |
| 11428 | rs4227346   | 8 | 94988717  | G | G | G | G | G | G    |
| 11429 | rs4227350   | 8 | 94988972  | G | G | A | G | A | G    |
| 11430 | rs3666069   | 8 | 95051427  | G | G | G | A | G | G    |
| 11431 | rs6285803   | 8 | 95323284  | G | G | A | A | A | G    |
| 11432 | rs3685072   | 8 | 95515302  | A | A | T | T | T | A    |
| 11433 | rs3661882   | 8 | 95633139  | A | G | A | G | A | G    |
| 11434 | rs3696312   | 8 | 95820753  | C | C | A | C | A | C    |
| 11435 | rs3089755   | 8 | 95862495  | A | A | A | A | A | C    |
| 11436 | rs6290035   | 8 | 96081430  | C | C | C | A | C | C    |
| 11437 | rs3664869   | 8 | 96228920  | A | G | G | G | G | G    |
| 11438 | rs3684459   | 8 | 96365192  | G | G | G | A | G | G    |
| 11439 | rs3679439   | 8 | 96471408  | A | C | C | C | C | A    |
| 11440 | rs2020707   | 8 | 96683637  | C | C | C | C | C | C    |
| 11441 | rs6287320   | 8 | 96735663  | G | G | G | A | G | G    |
| 11442 | rs3672391   | 8 | 96746212  | G | A | G | A | G | G    |
| 11443 | rs3663506   | 8 | 97051415  | A | G | G | G | G | A    |
| 11444 | rs3088737   | 8 | 97439139  | T | T | T | T | T | T    |
| 11445 | rs3691353   | 8 | 97606956  | G | G | G | G | G | NONE |
| 11446 | rs6371774   | 8 | 97626358  | A | A | A | A | A | A    |
| 11447 | mCV23909575 | 8 | 97810205  | C | A | C | A | C | C    |
| 11448 | rs3660197   | 8 | 97926146  | G | G | A | G | A | G    |
| 11449 | rs6409725   | 8 | 97995175  | C | C | C | A | C | C    |
| 11450 | rs3685310   | 8 | 98445448  | G | G | G | A | G | G    |
| 11451 | mCV25155100 | 8 | 99491355  | A | A | G | G | G | G    |
| 11452 | rs3687643   | 8 | 99357148  | G | G | A | A | A | A    |
| 11453 | rs6302053   | 8 | 99376344  | G | G | A | A | A | A    |
| 11454 | rs6299827   | 8 | 99742911  | A | A | A | G | A | A    |
| 11455 | rs3721390   | 8 | 99781130  | G | A | A | A | A | A    |
| 11456 | rs3683922   | 8 | 99806477  | A | A | A | G | A | A    |
| 11457 | rs3670293   | 8 | 100121767 | G | A | A | G | A | A    |
| 11458 | rs3706149   | 8 | 100766333 | A | C | A | C | A | A    |
| 11459 | rs3703566   | 8 | 100815188 | T | A | T | A | T | T    |
| 11460 | rs6184991   | 8 | 101043753 | A | G | G | A | G | G    |
| 11461 | rs6398478   | 8 | 101199871 | G | A | A | A | A | A    |
| 11462 | rs3655905   | 8 | 101210080 | G | A | A | G | A | A    |
| 11463 | rs3669235   | 8 | 101399186 | A | G | G | A | G | G    |
| 11464 | rs3088611   | 8 | 101552864 | A | A | A | A | A | A    |
| 11465 | rs3725510   | 8 | 101587237 | G | A | A | A | A | A    |
| 11466 | mCV23424042 | 8 | 101888552 | T | A | T | A | T | T    |
| 11467 | rs6343029   | 8 | 101690853 | G | G | G | A | G | G    |

|       |             |   |           |   |   |   |   |   |   |
|-------|-------------|---|-----------|---|---|---|---|---|---|
| 11468 | rs6277144   | 8 | 101939750 | G | G | A | G | A | A |
| 11469 | rs3675894   | 8 | 101988104 | A | A | A | C | A | A |
| 11470 | rs3705275   | 8 | 102686478 | G | G | A | A | G | A |
| 11471 | rs3693083   | 8 | 102726995 | A | A | A | C | A | C |
| 11472 | rs6259355   | 8 | 102731137 | G | G | G | A | G | A |
| 11473 | rs6266614   | 8 | 103935312 | A | A | A | A | A | A |
| 11474 | rs3677807   | 8 | 106003031 | T | T | T | A | T | A |
| 11475 | rs6322354   | 8 | 104555441 | A | A | A | A | A | A |
| 11476 | rs8237135   | 8 | 104835786 | A | A | A | A | A | A |
| 11477 | rs8278915   | 8 | 104835954 | G | G | G | G | G | G |
| 11478 | rs8238610   | 8 | 104836347 | G | G | G | G | G | G |
| 11479 | rs8279106   | 8 | 105247164 | A | A | A | A | A | A |
| 11480 | rs8278979   | 8 | 105274413 | A | A | A | A | A | A |
| 11481 | rs8237141   | 8 | 105275795 | T | T | T | T | T | T |
| 11482 | rs3672761   | 8 | 106133227 | G | G | G | A | G | A |
| 11483 | rs6182338   | 8 | 106291302 | A | A | A | G | A | A |
| 11484 | rs3090934   | 8 | 106322625 | A | A | A | A | A | A |
| 11485 | rs6200325   | 8 | 106776000 | G | G | G | G | G | G |
| 11486 | rs4227362   | 8 | 106892879 | A | A | A | A | A | A |
| 11487 | rs4227361   | 8 | 106893247 | G | G | G | G | G | G |
| 11488 | rs3666037   | 8 | 107255801 | C | C | C | A | C | C |
| 11489 | rs3715791   | 8 | 107455154 | A | A | A | G | A | A |
| 11490 | rs3716360   | 8 | 107455220 | A | A | A | G | A | A |
| 11491 | rs6184273   | 8 | 107477850 | G | G | G | G | G | G |
| 11492 | rs3681151   | 8 | 107923763 | G | G | G | G | G | G |
| 11493 | rs6200314   | 8 | 108113736 | G | G | G | G | G | G |
| 11494 | rs4138940   | 8 | 108402238 | A | A | A | G | A | A |
| 11495 | mCV24836362 | 8 | 108850021 | A | A | A | A | A | A |
| 11496 | rs4227364   | 8 | 108496466 | A | A | A | A | A | A |
| 11497 | rs3662808   | 8 | 108727362 | G | G | G | A | G | G |
| 11498 | rs3691375   | 8 | 108731233 | G | G | G | A | G | G |
| 11499 | rs3090468   | 8 | 109170284 | G | G | G | G | G | G |
| 11500 | rs6154497   | 8 | 109244358 | A | A | A | A | A | A |
| 11501 | rs6237645   | 8 | 109333466 | G | G | G | A | G | G |
| 11502 | rs6341444   | 8 | 109636176 | A | A | A | A | A | A |
| 11503 | rs6328195   | 8 | 109864758 | G | G | G | G | G | G |
| 11504 | rs4232695   | 8 | 110066120 | A | A | A | A | A | A |
| 11505 | rs6297414   | 8 | 110619806 | G | G | G | G | G | G |
| 11506 | rs8238613   | 8 | 111005936 | G | G | G | G | G | G |
| 11507 | rs8238614   | 8 | 111006002 | A | A | A | A | A | A |
| 11508 | rs3663135   | 8 | 111029384 | A | A | A | A | A | A |
| 11509 | rs3689933   | 8 | 111816074 | A | A | A | A | A | A |
| 11510 | rs6350174   | 8 | 112677037 | G | G | G | G | G | G |
| 11511 | rs6389434   | 8 | 112908379 | G | G | G | G | G | G |
| 11512 | rs3666593   | 8 | 113096129 | G | G | G | G | G | G |
| 11513 | rs3693520   | 8 | 113155823 | A | G | G | G | G | G |
| 11514 | rs3700124   | 8 | 113595205 | G | A | A | G | A | G |
| 11515 | rs4227398   | 8 | 113744792 | A | C | C | C | C | C |
| 11516 | rs4227396   | 8 | 113744959 | C | C | C | C | C | C |
| 11517 | rs6379589   | 8 | 114100638 | G | G | G | G | G | G |
| 11518 | rs6282843   | 8 | 114509632 | G | G | G | G | G | G |
| 11519 | rs3691294   | 8 | 114511091 | A | G | G | G | G | G |
| 11520 | rs4227407   | 8 | 114583691 | A | A | A | A | A | A |
| 11521 | rs4227399   | 8 | 114584003 | G | G | G | G | G | G |
| 11522 | rs3671292   | 8 | 114851035 | A | A | G | A | A | A |
| 11523 | rs3709966   | 8 | 115085512 | A | A | G | A | G | G |
| 11524 | rs6175006   | 8 | 115169489 | T | T | T | T | T | T |
| 11525 | rs3656840   | 8 | 115618395 | A | A | C | A | C | C |
| 11526 | rs6347490   | 8 | 115958589 | C | C | C | C | A | C |
| 11527 | rs6188329   | 8 | 116277529 | T | T | T | T | T | T |
| 11528 | rs3665212   | 8 | 116281751 | A | A | A | A | A | G |
| 11529 | rs4227408   | 8 | 117154433 | A | A | A | A | A | A |
| 11530 | rs6210613   | 8 | 117450205 | C | C | C | C | C | C |
| 11531 | rs6213878   | 8 | 118208362 | G | G | G | G | G | G |
| 11532 | rs3691647   | 8 | 118756738 | G | G | G | G | G | G |
| 11533 | rs6216508   | 8 | 119493663 | A | A | A | A | A | A |
| 11534 | rs8238617   | 8 | 120122308 | A | A | A | A | A | A |
| 11535 | rs4227416   | 8 | 120553054 | G | G | G | G | G | G |
| 11536 | rs4227417   | 8 | 120553211 | G | G | G | G | G | G |
| 11537 | rs6276423   | 8 | 120745248 | C | C | C | C | C | C |
| 11538 | rs3657839   | 8 | 120997427 | A | G | G | A | A | A |
| 11539 | rs3708073   | 8 | 121235325 | T | T | T | A | A | T |
| 11540 | rs4227424   | 8 | 121271580 | G | G | G | G | G | G |
| 11541 | rs6392868   | 8 | 121484953 | T | T | T | A | A | T |

|       |             |   |           |      |   |   |   |   |   |
|-------|-------------|---|-----------|------|---|---|---|---|---|
| 11542 | rs3708550   | 8 | 121508436 | A    | A | A | C | C | A |
| 11543 | rs3711782   | 8 | 121665420 | G    | G | G | A | A | G |
| 11544 | rs3675125   | 8 | 121724573 | G    | A | A | G | G | G |
| 11545 | rs6377872   | 8 | 121825605 | A    | A | A | T | T | A |
| 11546 | rs3667780   | 8 | 122022305 | A    | G | G | A | A | A |
| 11547 | rs3705615   | 8 | 122040166 | G    | A | A | G | G | G |
| 11548 | rs4227427   | 8 | 122405138 | G    | G | G | G | G | G |
| 11549 | rs3693295   | 8 | 122421153 | G    | G | G | A | A | A |
| 11550 | rs3723089   | 8 | 122426582 | G    | G | G | A | A | A |
| 11551 | mCV23469459 | 8 | 123010722 | G    | G | G | A | G | G |
| 11552 | rs4227429   | 8 | 122735839 | A    | G | A | G | G | G |
| 11553 | rs4227438   | 8 | 122874601 | A    | A | A | A | A | A |
| 11554 | rs4227433   | 8 | 122874883 | A    | A | A | A | A | A |
| 11555 | rs6153000   | 8 | 123141956 | A    | A | A | A | A | A |
| 11556 | rs8242265   | 8 | 123337127 | A    | G | A | A | A | A |
| 11557 | rs3705725   | 8 | 123350039 | NONE | G | G | A | A | G |
| 11558 | rs8249856   | 8 | 123351527 | A    | G | G | A | A | G |
| 11559 | rs6221454   | 8 | 123380261 | G    | A | G | G | G | G |
| 11560 | rs3689358   | 8 | 123456483 | G    | G | A | G | G | A |
| 11561 | rs8238636   | 8 | 123939602 | A    | G | A | A | A | A |
| 11562 | rs4227456   | 8 | 124053484 | G    | G | G | A | A | G |
| 11563 | rs4227466   | 8 | 124219494 | G    | G | G | G | G | G |
| 11564 | rs4227467   | 8 | 124219529 | C    | A | C | C | C | C |
| 11565 | rs4227469   | 8 | 124219626 | G    | A | A | G | G | G |
| 11566 | mCV23966377 | 8 | 124969611 | G    | A | G | G | G | G |
| 11567 | rs3685264   | 8 | 124496252 | A    | C | C | A | A | A |
| 11568 | rs6310608   | 8 | 124710759 | G    | A | A | G | G | G |
| 11569 | rs6311774   | 8 | 124868636 | C    | A | A | C | C | C |
| 11570 | rs4227470   | 8 | 125410202 | C    | G | G | C | C | C |
| 11571 | rs4227473   | 8 | 125410358 | A    | T | T | A | A | A |
| 11572 | rs3709567   | 8 | 125589380 | A    | G | G | A | A | A |
| 11573 | rs6163187   | 8 | 125594720 | G    | A | A | G | G | G |
| 11574 | rs6400423   | 8 | 125966003 | G    | G | G | A | G | A |
| 11575 | rs3691086   | 8 | 126818362 | G    | A | A | G | G | G |
| 11576 | rs6249615   | 8 | 126966423 | A    | G | G | A | A | A |
| 11577 | rs3668216   | 8 | 126970686 | G    | G | G | A | A | A |
| 11578 | rs4227489   | 8 | 127016412 | A    | A | A | A | A | A |
| 11579 | rs3697596   | 8 | 127236890 | G    | G | G | A | G | A |
| 11580 | rs3699035   | 8 | 127485505 | A    | T | T | A | T | A |
| 11581 | rs3703356   | 8 | 127609301 | C    | C | C | A | A | A |
| 11582 | rs3703161   | 8 | 127779058 | G    | G | G | A | A | A |
| 11583 | rs3667341   | 8 | 127990433 | G    | G | G | A | A | A |
| 11584 | rs3716715   | 8 | 128006168 | G    | G | G | A | G | G |
| 11585 | mCV23489377 | 8 | 130602738 | G    | A | A | A | G | A |
| 11586 | rs6250817   | 8 | 128230076 | G    | G | G | G | G | G |
| 11587 | rs3695597   | 8 | 128355283 | T    | A | A | A | T | A |
| 11588 | rs4227297   | 8 | 84374585  | G    | G | G | G | G | G |
| 11589 | mCV23053483 | 9 | 6793269   | A    | T | T | T | T | T |
| 11590 | mCV22542369 | 9 | 7669249   | G    | A | A | A | A | A |
| 11591 | mCV24989119 | 9 | 7739786   | C    | A | A | A | A | A |
| 11592 | mCV23955099 | 9 | 8534239   | C    | A | A | A | A | A |
| 11593 | rs6242233   | 9 | 3355872   | A    | A | A | A | A | A |
| 11594 | rs6411297   | 9 | 4481459   | A    | A | A | A | A | A |
| 11595 | rs3678028   | 9 | 4678652   | C    | G | G | G | G | G |
| 11596 | rs3726620   | 9 | 5185456   | A    | G | G | G | G | G |
| 11597 | rs6269094   | 9 | 5305232   | A    | A | A | A | A | A |
| 11598 | rs3692968   | 9 | 5921068   | A    | G | G | G | G | G |
| 11599 | mCV24464880 | 9 | 11994842  | G    | G | G | G | G | G |
| 11600 | rs6379269   | 9 | 6306706   | A    | A | A | A | A | A |
| 11601 | rs6167568   | 9 | 6577471   | G    | A | A | A | A | A |
| 11602 | mCV24465575 | 9 | 12387092  | G    | A | A | G | A | G |
| 11603 | rs4227540   | 9 | 6874936   | A    | A | A | A | A | A |
| 11604 | rs6235778   | 9 | 7428167   | T    | T | T | T | T | T |
| 11605 | mCV24996175 | 9 | 7670190   | G    | A | A | G | A | G |
| 11606 | mCV24996176 | 9 | 7670488   | G    | A | A | G | A | G |
| 11607 | mCV23201775 | 9 | 13255595  | G    | A | A | G | A | G |
| 11608 | mCV23201786 | 9 | 13256439  | A    | C | C | A | C | A |
| 11609 | mCV23202095 | 9 | 13260761  | A    | G | G | A | G | A |
| 11610 | rs3661469   | 9 | 7740845   | T    | A | A | A | A | A |
| 11611 | mCV23202466 | 9 | 13321398  | G    | C | C | G | C | G |
| 11612 | mCV23202474 | 9 | 13321426  | A    | T | T | A | T | A |
| 11613 | mCV24962297 | 9 | 13425598  | A    | G | G | A | G | A |
| 11614 | rs3727132   | 9 | 8116085   | A    | G | G | G | G | G |
| 11615 | rs3661373   | 9 | 8120246   | G    | A | A | A | A | A |

|       |             |   |          |   |   |   |   |   |   |
|-------|-------------|---|----------|---|---|---|---|---|---|
| 11616 | rs6155297   | 9 | 8299999  | G | A | A | A | A | A |
| 11617 | rs3701093   | 9 | 9004816  | T | A | A | A | A | A |
| 11618 | rs6351660   | 9 | 9365743  | G | A | A | A | A | A |
| 11619 | rs3695693   | 9 | 9632007  | C | G | G | G | G | G |
| 11620 | mCV24995380 | 9 | 9657199  | G | A | A | A | A | A |
| 11621 | mCV23237360 | 9 | 9666027  | G | A | A | A | A | A |
| 11622 | mCV25073238 | 9 | 10587580 | A | G | G | A | G | A |
| 11623 | rs6196252   | 9 | 10778066 | A | A | A | A | A | A |
| 11624 | rs6324914   | 9 | 11665259 | C | C | C | C | C | C |
| 11625 | rs6285155   | 9 | 13034415 | A | A | A | A | A | A |
| 11626 | rs3023202   | 9 | 13263667 | A | G | G | A | G | A |
| 11627 | rs3718464   | 9 | 13295532 | T | A | A | T | A | T |
| 11628 | rs6180788   | 9 | 13507391 | C | C | C | C | C | C |
| 11629 | rs6240706   | 9 | 14322913 | A | A | A | A | A | A |
| 11630 | rs8239692   | 9 | 14586513 | A | A | A | A | A | A |
| 11631 | rs6290681   | 9 | 14868879 | G | G | G | G | G | G |
| 11632 | rs4227548   | 9 | 14897728 | G | G | G | G | G | G |
| 11633 | rs3089697   | 9 | 15387348 | A | A | A | A | A | A |
| 11634 | rs3716850   | 9 | 16191378 | A | G | G | G | G | A |
| 11635 | rs6394008   | 9 | 16282893 | G | G | G | G | G | G |
| 11636 | rs6275116   | 9 | 16732952 | G | G | G | G | G | G |
| 11637 | rs3721992   | 9 | 17245414 | G | A | A | A | A | G |
| 11638 | rs4227551   | 9 | 17355435 | A | A | A | A | A | A |
| 11639 | rs4227553   | 9 | 17355553 | A | A | A | A | A | A |
| 11640 | rs6277772   | 9 | 17520764 | C | C | C | C | C | C |
| 11641 | rs3700279   | 9 | 17641681 | G | A | A | A | A | G |
| 11642 | rs6402130   | 9 | 18122743 | A | A | A | A | A | A |
| 11643 | rs8274490   | 9 | 18181566 | C | C | C | C | C | C |
| 11644 | rs8274473   | 9 | 18183224 | G | G | G | G | G | G |
| 11645 | rs8274442   | 9 | 18197597 | A | A | A | A | A | A |
| 11646 | rs8274446   | 9 | 18197810 | A | A | A | A | A | A |
| 11647 | rs3722569   | 9 | 18820769 | A | C | C | C | C | A |
| 11648 | rs6331746   | 9 | 18943675 | G | G | G | G | G | G |
| 11649 | rs6297821   | 9 | 19810815 | A | A | A | A | A | A |
| 11650 | rs3683132   | 9 | 20140587 | G | A | A | A | A | A |
| 11651 | rs3665597   | 9 | 20424801 | G | A | A | A | A | G |
| 11652 | rs3656141   | 9 | 20453835 | G | A | A | A | A | G |
| 11653 | rs8266443   | 9 | 20576536 | A | G | G | G | G | A |
| 11654 | rs8266450   | 9 | 20584236 | G | G | G | G | G | G |
| 11655 | rs3666413   | 9 | 20620188 | G | A | A | A | A | G |
| 11656 | rs8243217   | 9 | 20960384 | A | A | A | A | A | A |
| 11657 | rs6167265   | 9 | 21059073 | G | A | A | A | A | G |
| 11658 | rs8270115   | 9 | 21900659 | G | G | G | G | G | A |
| 11659 | rs8236775   | 9 | 21901138 | C | C | C | C | C | A |
| 11660 | rs8236776   | 9 | 21902397 | G | G | G | G | G | G |
| 11661 | rs6266909   | 9 | 22219987 | C | C | C | C | C | C |
| 11662 | rs4227556   | 9 | 22273214 | A | A | A | A | A | A |
| 11663 | rs3713696   | 9 | 23438112 | C | A | A | A | A | C |
| 11664 | rs6382323   | 9 | 23640125 | G | A | A | A | A | G |
| 11665 | rs3691360   | 9 | 24033823 | A | G | G | G | G | A |
| 11666 | rs6183014   | 9 | 24567282 | G | G | G | A | G | G |
| 11667 | rs4227562   | 9 | 24675552 | A | A | A | A | A | G |
| 11668 | rs3088801   | 9 | 24949186 | A | A | A | A | A | G |
| 11669 | rs6217232   | 9 | 25098554 | T | T | T | T | T | T |
| 11670 | rs6306091   | 9 | 26029136 | T | T | T | T | T | T |
| 11671 | rs3686936   | 9 | 26774587 | G | A | A | A | A | G |
| 11672 | rs3662999   | 9 | 26948960 | A | C | C | C | C | A |
| 11673 | rs3702035   | 9 | 26950741 | A | G | G | G | G | A |
| 11674 | rs6347341   | 9 | 27254683 | A | A | A | A | A | A |
| 11675 | rs4227571   | 9 | 27307904 | A | A | A | A | A | A |
| 11676 | rs6227937   | 9 | 28072195 | T | T | T | T | T | T |
| 11677 | rs4227572   | 9 | 28950551 | A | A | A | A | A | A |
| 11678 | rs3023203   | 9 | 29090669 | A | A | A | A | A | G |
| 11679 | rs6385855   | 9 | 29608871 | A | A | A | A | A | G |
| 11680 | mCV25302097 | 9 | 36463035 | G | G | G | A | A | G |
| 11681 | rs6371905   | 9 | 30434840 | A | A | A | A | A | A |
| 11682 | rs4227577   | 9 | 30439665 | A | A | A | A | A | A |
| 11683 | rs4227580   | 9 | 30439860 | A | A | A | A | A | A |
| 11684 | rs3685626   | 9 | 31189234 | G | G | G | G | G | G |
| 11685 | rs6243527   | 9 | 31593862 | A | A | A | A | G | A |
| 11686 | rs4227587   | 9 | 32741886 | A | A | A | A | G | A |
| 11687 | rs3665206   | 9 | 32825296 | A | A | A | G | G | G |
| 11688 | mCV24912785 | 9 | 39336987 | T | T | T | T | A | A |
| 11689 | rs3704185   | 9 | 33290307 | A | A | A | C | C | A |

|       |             |   |          |   |   |   |   |      |   |
|-------|-------------|---|----------|---|---|---|---|------|---|
| 11690 | rs3713675   | 9 | 33294662 | G | G | G | A | G    | G |
| 11691 | rs6406454   | 9 | 33369216 | G | G | G | A | G    | G |
| 11692 | rs3655898   | 9 | 33657166 | G | G | G | A | G    | G |
| 11693 | rs3686563   | 9 | 33776333 | G | G | G | A | A    | G |
| 11694 | rs6284286   | 9 | 34183554 | C | C | C | A | C    | C |
| 11695 | rs3711756   | 9 | 34437206 | G | G | G | A | G    | A |
| 11696 | rs6258765   | 9 | 34555460 | C | C | C | A | C    | C |
| 11697 | rs4139403   | 9 | 34622296 | A | A | A | C | A    | A |
| 11698 | rs3686022   | 9 | 35298490 | G | G | G | A | G    | G |
| 11699 | rs3090475   | 9 | 35340389 | G | G | G | G | G    | G |
| 11700 | rs3665911   | 9 | 35973861 | A | A | A | G | A    | A |
| 11701 | rs6186560   | 9 | 36098858 | A | A | A | A | A    | A |
| 11702 | rs3687584   | 9 | 36334827 | G | G | G | A | G    | G |
| 11703 | mCV22570522 | 9 | 43148138 | A | A | A | G | A    | G |
| 11704 | rs6309058   | 9 | 36752515 | A | A | A | G | G    | A |
| 11705 | rs3669224   | 9 | 37029046 | G | G | G | A | G    | G |
| 11706 | rs6207781   | 9 | 37083126 | G | G | G | A | G    | A |
| 11707 | mCV22343725 | 9 | 43675889 | A | G | G | A | G    | A |
| 11708 | rs3719607   | 9 | 37214680 | C | C | C | A | C    | A |
| 11709 | rs4227601   | 9 | 37237681 | G | G | G | G | G    | G |
| 11710 | rs3711100   | 9 | 37679640 | C | C | C | G | G    | C |
| 11711 | rs6413270   | 9 | 38721575 | C | C | C | C | A    | A |
| 11712 | rs8254842   | 9 | 38270131 | C | C | C | C | C    | C |
| 11713 | rs8254841   | 9 | 38270194 | T | T | T | A | T    | A |
| 11714 | rs3678183   | 9 | 38346628 | A | A | A | G | A    | G |
| 11715 | rs3688291   | 9 | 38393208 | A | A | A | G | A    | G |
| 11716 | rs3694949   | 9 | 38471539 | G | G | G | A | G    | A |
| 11717 | rs6198455   | 9 | 39010413 | G | G | G | G | G    | G |
| 11718 | rs6186807   | 9 | 39501003 | A | A | A | A | G    | G |
| 11719 | rs3675289   | 9 | 39726307 | A | A | A | C | C    | C |
| 11720 | rs6240566   | 9 | 40486634 | A | A | A | G | A    | G |
| 11721 | rs6373035   | 9 | 40512405 | G | G | G | A | G    | G |
| 11722 | rs3718089   | 9 | 40533954 | A | A | A | G | A    | G |
| 11723 | rs6266353   | 9 | 40676863 | T | T | T | A | T    | T |
| 11724 | rs3714664   | 9 | 40768895 | A | A | A | G | A    | G |
| 11725 | rs8239740   | 9 | 40868616 | G | G | G | G | G    | G |
| 11726 | rs8239688   | 9 | 40868764 | A | A | A | A | A    | A |
| 11727 | rs3023208   | 9 | 41188295 | G | G | G | A | G    | G |
| 11728 | rs3671538   | 9 | 41225623 | G | G | G | C | G    | G |
| 11729 | rs3707491   | 9 | 41233382 | G | G | G | A | G    | G |
| 11730 | rs6316763   | 9 | 41336433 | G | G | G | C | G    | G |
| 11731 | rs3722927   | 9 | 41741220 | A | A | A | G | A    | A |
| 11732 | rs3668547   | 9 | 41823689 | A | A | A | G | A    | A |
| 11733 | rs4227602   | 9 | 42067272 | A | A | A | A | A    | A |
| 11734 | rs4227605   | 9 | 42067448 | T | T | T | T | T    | T |
| 11735 | mCV25072221 | 9 | 49588552 | A | G | G | A | G    | A |
| 11736 | rs3702448   | 9 | 42134462 | A | A | A | G | A    | A |
| 11737 | rs3674874   | 9 | 42138499 | C | A | A | C | C    | A |
| 11738 | rs6388711   | 9 | 42335082 | G | G | G | A | G    | G |
| 11739 | rs3676086   | 9 | 42913532 | A | G | G | G | A    | G |
| 11740 | rs4135590   | 9 | 43060131 | G | G | G | A | G    | A |
| 11741 | rs6399406   | 9 | 43318395 | G | A | A | G | A    | G |
| 11742 | rs4135836   | 9 | 43354554 | G | A | A | G | A    | A |
| 11743 | rs3676087   | 9 | 43594065 | A | G | G | G | G    | G |
| 11744 | rs3653389   | 9 | 43942674 | A | G | G | G | G    | A |
| 11745 | rs8236788   | 9 | 44148217 | G | G | G | G | G    | G |
| 11746 | rs6400838   | 9 | 44302276 | A | C | C | C | C    | C |
| 11747 | mCV23098764 | 9 | 51873443 | G | G | G | A | G    | G |
| 11748 | rs8254820   | 9 | 44438572 | A | A | A | A | A    | A |
| 11749 | rs3696264   | 9 | 44630289 | G | G | G | A | G    | A |
| 11750 | rs3700385   | 9 | 45063906 | G | G | G | A | G    | G |
| 11751 | rs8259427   | 9 | 46778141 | G | G | G | C | NONE | G |
| 11752 | rs6338678   | 9 | 45237003 | A | T | T | T | T    | T |
| 11753 | rs8275141   | 9 | 45278211 | G | A | A | A | A    | A |
| 11754 | rs8274947   | 9 | 45286427 | G | G | G | G | G    | G |
| 11755 | rs8274958   | 9 | 45286612 | A | G | G | G | G    | G |
| 11756 | rs6329880   | 9 | 45698924 | G | A | A | A | A    | A |
| 11757 | rs8254904   | 9 | 46333019 | G | A | A | A | A    | A |
| 11758 | rs8254905   | 9 | 46333043 | G | A | A | A | A    | A |
| 11759 | rs8254906   | 9 | 46333141 | G | G | G | G | G    | G |
| 11760 | rs8254929   | 9 | 46335107 | G | A | A | A | A    | A |
| 11761 | rs3693115   | 9 | 46665767 | A | A | A | G | A    | A |
| 11762 | rs6348780   | 9 | 46880329 | G | A | A | G | A    | A |
| 11763 | rs3673816   | 9 | 47336242 | A | G | G | A | G    | G |

|       |             |   |          |   |   |   |   |     |      |
|-------|-------------|---|----------|---|---|---|---|-----|------|
| 11764 | rs6395817   | 9 | 47519917 | A | G | G | A | G   | G    |
| 11765 | rs3710199   | 9 | 47719578 | G | G | G | C | G   | G    |
| 11766 | rs6165968   | 9 | 47739976 | G | G | G | A | G   | G    |
| 11767 | rs3661445   | 9 | 47889231 | A | A | A | G | A   | A    |
| 11768 | rs3665709   | 9 | 48720327 | G | G | G | A | G   | G    |
| 11769 | rs3684930   | 9 | 48879953 | G | G | G | A | G   | G    |
| 11770 | rs3709825   | 9 | 49384481 | A | G | G | A | G   | A    |
| 11771 | rs6186629   | 9 | 49983607 | A | A | A | A | A   | A    |
| 11772 | rs3659951   | 9 | 50241775 | A | G | G | A | G   | NONE |
| 11773 | rs3710982   | 9 | 50720207 | A | G | G | G | G   | G    |
| 11774 | rs4227637   | 9 | 50757239 | G | G | G | G | G   | G    |
| 11775 | rs3693234   | 9 | 50942491 | A | G | G | A | G   | A    |
| 11776 | rs6160923   | 9 | 51490019 | G | A | A | A | A   | A    |
| 11777 | mCV25237837 | 9 | 59540846 | A | A | A | G | A   | A    |
| 11778 | rs4138776   | 9 | 52212448 | G | G | G | A | G   | A    |
| 11779 | rs3656996   | 9 | 52352560 | G | G | G | A | G   | A    |
| 11780 | rs3723670   | 9 | 52682809 | C | C | C | A | A   | C    |
| 11781 | rs6345786   | 9 | 52692404 | C | C | C | A | A   | C    |
| 11782 | rs3654569   | 9 | 52718460 | A | C | C | C | C   | A    |
| 11783 | rs4227649   | 9 | 52844633 | G | G | G | G | G   | G    |
| 11784 | rs3659196   | 9 | 53433294 | G | A | A | G | G   | G    |
| 11785 | rs6248743   | 9 | 53601731 | A | A | A | A | A   | A    |
| 11786 | rs3658802   | 9 | 53613660 | G | A | A | A | A   | A    |
| 11787 | rs3689326   | 9 | 54114690 | A | A | A | G | A   | A    |
| 11788 | rs6379062   | 9 | 54349888 | A | A | A | G | G   | G    |
| 11789 | rs8240045   | 9 | 54359512 | G | G | G | G | G   | G    |
| 11790 | rs8259445   | 9 | 54360101 | A | A | A | A | A   | A    |
| 11791 | rs8259447   | 9 | 54360105 | G | G | G | A | A   | A    |
| 11792 | rs8259443   | 9 | 54360717 | A | A | A | C | C   | C    |
| 11793 | rs3688570   | 9 | 54868302 | A | G | G | G | A   | G    |
| 11794 | rs6206488   | 9 | 55121701 | G | A | A | A | G   | A    |
| 11795 | rs3660104   | 9 | 55194665 | G | A | A | A | G   | A    |
| 11796 | rs3089391   | 9 | 55507137 | A | G | G | G | A/G | G    |
| 11797 | rs4227674   | 9 | 55642459 | A | A | A | A | A   | A    |
| 11798 | rs6206353   | 9 | 56118889 | A | A | A | G | A   | G    |
| 11799 | mCV23531990 | 9 | 64058432 | A | A | A | G | G   | A    |
| 11800 | rs3669687   | 9 | 56139893 | G | G | G | A | G   | G    |
| 11801 | rs3653677   | 9 | 56142404 | G | G | G | C | G   | G    |
| 11802 | rs6334600   | 9 | 56740468 | G | G | G | C | G   | G    |
| 11803 | rs4135891   | 9 | 56899794 | C | C | C | C | C   | C    |
| 11804 | rs3677551   | 9 | 56909480 | C | C | C | A | C   | A    |
| 11805 | rs4136521   | 9 | 57468932 | G | G | G | A | G   | G    |
| 11806 | mCV24747902 | 9 | 65674795 | G | G | G | A | G   | G    |
| 11807 | mCV24747892 | 9 | 65674956 | C | C | C | G | C   | C    |
| 11808 | mCV24747891 | 9 | 65674981 | A | A | A | G | A   | A    |
| 11809 | mCV24747878 | 9 | 65676763 | A | A | A | C | A   | C    |
| 11810 | mCV23286597 | 9 | 65680678 | G | G | G | A | G   | G    |
| 11811 | mCV23286598 | 9 | 65685669 | G | G | G | A | G   | A    |
| 11812 | mCV23286602 | 9 | 65686179 | A | A | A | A | A   | A    |
| 11813 | mCV23286604 | 9 | 65686368 | A | A | A | C | A   | C    |
| 11814 | mCV23286607 | 9 | 65686399 | A | A | A | G | A   | NONE |
| 11815 | mCV23286608 | 9 | 65687668 | C | C | C | A | C   | C    |
| 11816 | mCV23286609 | 9 | 65688219 | A | T | T | A | T   | NONE |
| 11817 | mCV23286614 | 9 | 65688458 | C | C | C | G | C   | C    |
| 11818 | mCV23286627 | 9 | 65689102 | A | A | A | G | A   | A    |
| 11819 | mCV25157255 | 9 | 65692431 | G | A | A | G | A   | G    |
| 11820 | mCV25157256 | 9 | 65693054 | G | G | G | A | G   | G    |
| 11821 | mCV25157266 | 9 | 65693084 | A | A | A | C | A   | A    |
| 11822 | rs3708863   | 9 | 57775693 | A | A | A | G | A   | A    |
| 11823 | mCV22595554 | 9 | 65952568 | T | A | A | A | T   | A    |
| 11824 | rs8236802   | 9 | 57886350 | G | G | G | G | G   | G    |
| 11825 | rs8252951   | 9 | 57887915 | A | A | A | A | A   | A    |
| 11826 | rs3696800   | 9 | 58145060 | G | A | A | A | A   | A    |
| 11827 | rs3089971   | 9 | 58451224 | A | A | A | A | A   | A    |
| 11828 | rs4227694   | 9 | 58470024 | A | A | A | G | A   | A    |
| 11829 | rs4227700   | 9 | 59087089 | A | A | A | G | A   | A    |
| 11830 | rs3668603   | 9 | 59119964 | G | G | G | A | G   | G    |
| 11831 | rs3676114   | 9 | 59239123 | G | G | G | A | G   | A    |
| 11832 | rs6154433   | 9 | 59398507 | G | G | G | A | G   | G    |
| 11833 | rs3685575   | 9 | 59598759 | A | A | A | G | A   | A    |
| 11834 | rs3671494   | 9 | 59871675 | A | G | G | G | G   | G    |
| 11835 | rs6224703   | 9 | 60196412 | G | G | G | A | G   | G    |
| 11836 | rs3664495   | 9 | 60295817 | C | C | C | A | C   | C    |
| 11837 | rs3680060   | 9 | 60460530 | A | A | A | C | C   | A    |



|       |             |   |          |   |   |   |   |   |      |
|-------|-------------|---|----------|---|---|---|---|---|------|
| 11838 | rs6358810   | 9 | 60714546 | G | G | G | A | A | G    |
| 11839 | rs3699230   | 9 | 61357334 | A | A | A | G | G | A    |
| 11840 | rs3714012   | 9 | 61377354 | A | A | A | G | G | A    |
| 11841 | rs6306396   | 9 | 61733262 | G | G | G | A | A | G    |
| 11842 | rs6249574   | 9 | 61940796 | G | A | A | G | G | A    |
| 11843 | rs3696688   | 9 | 62071779 | A | A | A | G | G | A    |
| 11844 | rs4227704   | 9 | 62605923 | G | A | A | G | G | A    |
| 11845 | rs4227706   | 9 | 62605978 | G | G | G | A | G | G    |
| 11846 | rs6172647   | 9 | 62742880 | A | G | G | A | A | G    |
| 11847 | rs3703593   | 9 | 62747939 | G | G | G | C | C | G    |
| 11848 | rs6359506   | 9 | 62882917 | A | G | G | A | A | G    |
| 11849 | rs4227717   | 9 | 63400816 | G | G | G | G | G | G    |
| 11850 | rs4227711   | 9 | 63401085 | A | A | A | A | A | A    |
| 11851 | rs6276212   | 9 | 63500929 | G | A | A | G | G | A    |
| 11852 | rs3656848   | 9 | 63587593 | G | A | A | G | G | A    |
| 11853 | rs3692389   | 9 | 63902859 | G | G | G | A | A | G    |
| 11854 | rs3090473   | 9 | 64225262 | A | A | A | A | A | A    |
| 11855 | rs3685822   | 9 | 64331117 | A | A | A | C | A | A    |
| 11856 | rs6305469   | 9 | 64578897 | A | G | G | A | G | G    |
| 11857 | rs3664300   | 9 | 64692206 | A | G | G | A | G | G    |
| 11858 | rs6195628   | 9 | 65200985 | A | A | A | A | A | C    |
| 11859 | rs4227726   | 9 | 65599173 | C | C | C | C | C | C    |
| 11860 | rs6361767   | 9 | 65686074 | G | G | G | G | G | G    |
| 11861 | rs3655717   | 9 | 65704935 | G | G | G | A | G | G    |
| 11862 | rs3658020   | 9 | 65748136 | G | G | G | A | G | A    |
| 11863 | rs3672857   | 9 | 65761685 | G | G | G | A | G | G    |
| 11864 | rs6374858   | 9 | 65789500 | G | C | C | G | G | C    |
| 11865 | rs3682157   | 9 | 66030736 | T | A | A | A | T | NONE |
| 11866 | rs3664533   | 9 | 66052926 | G | G | G | A | G | G    |
| 11867 | rs3694989   | 9 | 66399440 | G | G | G | A | G | G    |
| 11868 | mCV25319520 | 9 | 74796462 | G | G | G | G | G | G    |
| 11869 | rs3714882   | 9 | 66443388 | A | A | A | T | A | A    |
| 11870 | rs4139637   | 9 | 66521461 | A | G | G | A | G | G    |
| 11871 | rs6247360   | 9 | 66958874 | T | T | T | A | T | T    |
| 11872 | rs3670579   | 9 | 67147243 | G | C | C | C | C | C    |
| 11873 | rs4227730   | 9 | 67268286 | A | A | A | A | A | A    |
| 11874 | rs4227736   | 9 | 67268694 | A | A | A | A | A | G    |
| 11875 | rs3089092   | 9 | 67308733 | G | G | G | G | G | NONE |
| 11876 | rs3697853   | 9 | 67355255 | A | G | G | A | G | G    |
| 11877 | rs3658496   | 9 | 67860912 | A | A | A | G | G | G    |
| 11878 | rs6317714   | 9 | 67956830 | G | A | A | A | A | G    |
| 11879 | mCV25328470 | 9 | 76379295 | G | A | A | A | A | A    |
| 11880 | rs3716689   | 9 | 68356831 | A | G | G | G | G | G    |
| 11881 | rs6174757   | 9 | 68381485 | A | A | A | C | C | A    |
| 11882 | rs3703662   | 9 | 68586184 | G | G | G | A | G | G    |
| 11883 | rs3655098   | 9 | 68887196 | G | C | C | G | C | C    |
| 11884 | rs6395899   | 9 | 69143535 | G | C | C | G | C | C    |
| 11885 | rs130238    | 9 | 69144399 | A | A | A | A | A | A    |
| 11886 | rs3682714   | 9 | 69301407 | A | A | A | T | A | A    |
| 11887 | rs6212715   | 9 | 69375366 | G | G | G | A | G | G    |
| 11888 | rs3663861   | 9 | 69901619 | G | A | A | A | A | A    |
| 11889 | rs6355445   | 9 | 70209362 | A | G | G | A | G | G    |
| 11890 | rs4227744   | 9 | 70272017 | A | A | A | A | A | A    |
| 11891 | rs4227743   | 9 | 70272179 | A | A | A | A | A | A    |
| 11892 | rs3089222   | 9 | 70540782 | A | A | A | A | A | A    |
| 11893 | mCV22794972 | 9 | 79014269 | C | A | A | C | A | A    |
| 11894 | rs3703045   | 9 | 70566672 | C | A | A | C | A | A    |
| 11895 | mCV22793119 | 9 | 79178869 | G | A | A | A | A | A    |
| 11896 | rs6186431   | 9 | 70803602 | A | A | A | A | A | A    |
| 11897 | rs3721056   | 9 | 71328971 | A | A | A | G | A | A    |
| 11898 | rs3023216   | 9 | 71625312 | G | A | A | A | A | A    |
| 11899 | rs4227754   | 9 | 71824351 | A | A | A | A | A | A    |
| 11900 | rs6239320   | 9 | 71878535 | T | T | T | A | T | T    |
| 11901 | rs3707578   | 9 | 71895758 | G | G | G | A | G | G    |
| 11902 | rs3679620   | 9 | 71917482 | A | A | A | G | A | A    |
| 11903 | rs3693209   | 9 | 71973325 | G | G | G | A | G | G    |
| 11904 | rs3720204   | 9 | 72095202 | G | A | A | G | A | A    |
| 11905 | rs6283705   | 9 | 72271784 | C | A | A | C | A | A    |
| 11906 | rs3698342   | 9 | 72597929 | G | A | A | G | A | A    |
| 11907 | rs3711813   | 9 | 72680673 | G | G | G | A | G | G    |
| 11908 | rs3719772   | 9 | 72719122 | G | G | G | A | G | G    |
| 11909 | rs3724658   | 9 | 73062303 | G | A | A | G | A | A    |
| 11910 | rs3703712   | 9 | 73083979 | G | A | A | G | A | A    |
| 11911 | rs3665549   | 9 | 73383170 | A | G | G | A | G | G    |

|       |             |   |          |   |   |   |   |   |   |
|-------|-------------|---|----------|---|---|---|---|---|---|
| 11912 | rs6367765   | 9 | 73421223 | G | G | G | G | G | G |
| 11913 | rs6167970   | 9 | 73839572 | A | C | C | A | C | C |
| 11914 | rs3676158   | 9 | 73859220 | C | G | G | C | G | G |
| 11915 | rs3670437   | 9 | 74428342 | A | A | A | C | A | A |
| 11916 | rs4227780   | 9 | 74604963 | A | A | A | A | A | A |
| 11917 | rs6314302   | 9 | 74938295 | A | G | G | G | G | G |
| 11918 | rs3724833   | 9 | 75221496 | A | A | A | G | A | A |
| 11919 | rs3700733   | 9 | 75334924 | A | C | C | C | C | C |
| 11920 | rs6369641   | 9 | 75500918 | G | A | A | A | A | A |
| 11921 | rs8240602   | 9 | 75516091 | A | A | A | A | A | A |
| 11922 | rs4227782   | 9 | 75555536 | G | G | G | G | G | G |
| 11923 | rs6292345   | 9 | 75634870 | A | A | A | G | A | A |
| 11924 | rs3090482   | 9 | 75689615 | A | A | A | A | A | A |
| 11925 | rs6192289   | 9 | 76006820 | G | G | G | A | G | G |
| 11926 | rs4227795   | 9 | 76234862 | G | G | G | G | G | G |
| 11927 | rs4227791   | 9 | 76235022 | G | G | G | G | G | G |
| 11928 | rs6191894   | 9 | 76344735 | C | C | C | A | C | C |
| 11929 | rs3089007   | 9 | 76514916 | A | A | A | A | A | A |
| 11930 | rs3685573   | 9 | 76589717 | A | A | A | G | A | A |
| 11931 | mCV25075527 | 9 | 85263991 | A | A | A | A | G | A |
| 11932 | rs3675604   | 9 | 76824700 | C | A | A | A | A | A |
| 11933 | rs6304125   | 9 | 76933084 | A | A | A | A | A | A |
| 11934 | rs3089461   | 9 | 77270643 | G | G | G | G | G | G |
| 11935 | rs3725904   | 9 | 77471557 | G | G | G | A | G | G |
| 11936 | rs3674482   | 9 | 77705315 | G | G | G | A | G | G |
| 11937 | rs6369096   | 9 | 77780769 | C | C | C | A | C | C |
| 11938 | rs3693875   | 9 | 78291825 | A | T | T | T | T | T |
| 11939 | rs6217039   | 9 | 78563841 | G | A | A | G | A | A |
| 11940 | rs8261605   | 9 | 78564168 | A | G | G | A | G | G |
| 11941 | rs8261641   | 9 | 78570042 | A | A | A | A | A | A |
| 11942 | rs8261681   | 9 | 78574601 | G | A | A | G | A | A |
| 11943 | rs6172659   | 9 | 78582684 | A | G | G | A | G | G |
| 11944 | rs8257510   | 9 | 78717862 | A | A | A | A | A | A |
| 11945 | rs6257131   | 9 | 79059621 | G | A | A | A | A | A |
| 11946 | rs6210538   | 9 | 79240002 | A | G | G | G | G | G |
| 11947 | rs3712939   | 9 | 79541430 | T | A | A | A | A | A |
| 11948 | rs6302459   | 9 | 79977694 | G | G | G | A | G | G |
| 11949 | rs6213724   | 9 | 79999697 | A | G | G | A | G | G |
| 11950 | rs4222033   | 9 | 80172471 | C | C | C | C | C | C |
| 11951 | rs3686004   | 9 | 80122666 | A | A | A | C | A | A |
| 11952 | rs3654196   | 9 | 80569536 | A | A | A | G | A | A |
| 11953 | rs6284095   | 9 | 80606017 | A | G | G | A | G | G |
| 11954 | rs3679442   | 9 | 80623654 | A | A | A | G | A | A |
| 11955 | rs3658458   | 9 | 80709081 | A | A | A | G | A | A |
| 11956 | rs3023217   | 9 | 80713708 | G | G | G | G | G | G |
| 11957 | rs6393229   | 9 | 81058179 | G | G | G | G | G | G |
| 11958 | rs3700389   | 9 | 81179058 | A | A | A | T | A | A |
| 11959 | rs3697374   | 9 | 81444528 | T | T | T | A | T | T |
| 11960 | rs6165929   | 9 | 81635126 | G | G | G | G | G | G |
| 11961 | rs3670195   | 9 | 81690623 | A | A | A | G | A | A |
| 11962 | rs6223687   | 9 | 82203633 | G | G | G | G | G | G |
| 11963 | rs3673457   | 9 | 82283038 | A | A | A | G | A | A |
| 11964 | mCV23571381 | 9 | 85117045 | A | A | A | A | A | A |
| 11965 | rs6293292   | 9 | 83174343 | C | C | C | C | C | C |
| 11966 | rs4227805   | 9 | 83275045 | T | T | T | T | T | T |
| 11967 | rs3676124   | 9 | 83548399 | A | A | A | G | A | A |
| 11968 | rs3677217   | 9 | 83981176 | G | G | G | A | G | G |
| 11969 | rs3672897   | 9 | 84122591 | A | A | A | T | A | A |
| 11970 | rs3714992   | 9 | 84686121 | A | A | A | C | C | C |
| 11971 | rs6256462   | 9 | 84805949 | A | A | A | G | A | A |
| 11972 | rs6251253   | 9 | 84917229 | A | A | A | C | A | A |
| 11973 | rs3677629   | 9 | 85083677 | A | A | A | G | G | G |
| 11974 | mCV22800726 | 9 | 90628091 | A | A | A | G | G | A |
| 11975 | rs3726941   | 9 | 85101889 | A | A | A | G | G | G |
| 11976 | rs3673117   | 9 | 85508520 | C | C | C | A | C | A |
| 11977 | rs3695050   | 9 | 85584599 | G | A | A | G | G | A |
| 11978 | rs3674339   | 9 | 85923211 | A | G | G | A | G | G |
| 11979 | rs3675152   | 9 | 86169729 | G | A | A | A | A | G |
| 11980 | rs6226628   | 9 | 86286594 | A | A | A | G | A | A |
| 11981 | rs3700596   | 9 | 86745093 | G | G | G | A | G | G |
| 11982 | rs3720276   | 9 | 86752560 | G | G | G | A | G | G |
| 11983 | rs3666862   | 9 | 87310147 | G | G | G | A | A | A |
| 11984 | rs3698443   | 9 | 87500014 | G | G | G | A | A | G |
| 11985 | rs6280990   | 9 | 87514406 | G | G | G | A | G | G |

|       |             |   |           |   |   |   |   |   |      |
|-------|-------------|---|-----------|---|---|---|---|---|------|
| 11986 | rs6182207   | 9 | 87881245  | A | G | G | A | A | G    |
| 11987 | mCV24311071 | 9 | 93538851  | G | G | G | G | G | G    |
| 11988 | rs3725046   | 9 | 88164692  | G | A | A | G | G | A    |
| 11989 | rs3088739   | 9 | 88312295  | C | C | C | C | C | C    |
| 11990 | rs3669564   | 9 | 88325825  | C | C | C | A | C | C    |
| 11991 | rs3705632   | 9 | 88415320  | C | C | C | A | A | C    |
| 11992 | rs6277880   | 9 | 88646923  | A | A | A | G | A | A    |
| 11993 | rs3718318   | 9 | 89140953  | A | A | A | G | G | G    |
| 11994 | rs6308983   | 9 | 89142606  | A | A | A | G | G | G    |
| 11995 | rs4227830   | 9 | 89904872  | G | G | G | G | G | G    |
| 11996 | rs4227835   | 9 | 89905068  | G | G | G | G | G | G    |
| 11997 | rs3693091   | 9 | 90235325  | A | A | A | G | A | A    |
| 11998 | rs6352812   | 9 | 90239768  | A | A | A | A | G | A    |
| 11999 | rs6289295   | 9 | 90877586  | G | A | A | A | G | G    |
| 12000 | mCV25074968 | 9 | 96790891  | A | A | A | G | A | A    |
| 12001 | rs6320356   | 9 | 90957478  | A | A | A | A | G | G    |
| 12002 | rs6333444   | 9 | 91230897  | A | G | G | A | G | G    |
| 12003 | rs6309331   | 9 | 92107776  | A | T | T | A | A | A    |
| 12004 | rs6292067   | 9 | 92933158  | A | A | A | A | C | C    |
| 12005 | mCV25152676 | 9 | 98797502  | A | G | G | A | A | G    |
| 12006 | rs6241554   | 9 | 93604175  | G | G | G | G | G | G    |
| 12007 | rs4138352   | 9 | 94154288  | A | A | A | G | A | A    |
| 12008 | rs3712946   | 9 | 94330869  | A | A | A | G | A | A    |
| 12009 | rs2020612   | 9 | 94702937  | A | A | A | A | A | A    |
| 12010 | rs3725272   | 9 | 95000478  | C | A | A | C | A | C    |
| 12011 | rs3690580   | 9 | 95205462  | A | G | G | A | G | A    |
| 12012 | rs3023143   | 9 | 95220853  | C | A | A | C | A | C    |
| 12013 | rs6286096   | 9 | 95314164  | G | A | A | G | A | G    |
| 12014 | rs3706741   | 9 | 95665360  | G | A | A | A | A | A    |
| 12015 | rs3673055   | 9 | 96176970  | A | G | G | A | G | G    |
| 12016 | rs3689336   | 9 | 96256381  | G | G | G | A | G | G    |
| 12017 | rs3703831   | 9 | 96256474  | A | A | A | T | A | A    |
| 12018 | mCV25070728 | 9 | 102264793 | A | G | G | G | G | G    |
| 12019 | rs3712719   | 9 | 96380935  | A | C | C | C | C | C    |
| 12020 | rs6244819   | 9 | 96752986  | G | G | G | A | G | G    |
| 12021 | rs3705403   | 9 | 97197984  | C | C | C | A | C | C    |
| 12022 | rs2020556   | 9 | 97236852  | A | A | A | A | A | A    |
| 12023 | rs3689043   | 9 | 99904554  | A | A | A | G | A | A    |
| 12024 | rs6353709   | 9 | 100011170 | A | A | A | A | A | A    |
| 12025 | rs3699740   | 9 | 98339365  | A | A | A | G | A | A    |
| 12026 | rs4227862   | 9 | 98426970  | G | G | G | G | G | G    |
| 12027 | rs3720103   | 9 | 98576264  | A | G | G | A | G | G    |
| 12028 | mCV22558129 | 9 | 104516123 | A | A | A | G | A | A    |
| 12029 | rs6385971   | 9 | 99710289  | A | G | G | A | G | A    |
| 12030 | rs3708760   | 9 | 99867547  | A | G | G | A | A | A    |
| 12031 | rs4227879   | 9 | 100304693 | A | A | A | A | A | A    |
| 12032 | rs4227882   | 9 | 100304772 | G | G | G | G | G | G    |
| 12033 | rs3722432   | 9 | 100525842 | G | A | A | G | A | A    |
| 12034 | rs6235582   | 9 | 100554543 | A | G | G | A | G | G    |
| 12035 | rs4227886   | 9 | 100640253 | G | G | G | G | G | G    |
| 12036 | rs3657562   | 9 | 100677183 | A | C | C | A | C | C    |
| 12037 | rs6377847   | 9 | 100692014 | A | G | G | A | G | A    |
| 12038 | rs3688878   | 9 | 101330986 | A | A | A | G | A | A    |
| 12039 | rs6190068   | 9 | 101511411 | C | C | C | A | C | C    |
| 12040 | rs3089531   | 9 | 101778520 | A | A | A | G | A | A    |
| 12041 | rs3717654   | 9 | 101878542 | G | G | G | A | G | G    |
| 12042 | rs3672865   | 9 | 101882437 | A | A | A | G | A | G    |
| 12043 | rs3717183   | 9 | 101885081 | T | T | T | A | T | NONE |
| 12044 | rs6286924   | 9 | 101934650 | A | A | A | G | A | G    |
| 12045 | rs3706728   | 9 | 102349284 | A | G | G | A | G | A    |
| 12046 | rs3713420   | 9 | 102425391 | C | A | A | A | A | A    |
| 12047 | rs3707740   | 9 | 102618317 | G | G | G | A | G | G    |
| 12048 | rs3023229   | 9 | 102924025 | C | C | C | C | C | C    |
| 12049 | rs3657346   | 9 | 103089061 | A | A | A | C | C | A    |
| 12050 | rs4227888   | 9 | 103282438 | T | T | T | T | T | T    |
| 12051 | rs3690330   | 9 | 103410092 | T | T | T | T | T | T    |
| 12052 | rs3088463   | 9 | 103527865 | A | G | G | A | A | A    |
| 12053 | rs6267252   | 9 | 103599442 | C | A | A | C | C | C    |
| 12054 | rs6363194   | 9 | 103623096 | A | G | G | A | A | A    |
| 12055 | mCV24631499 | 9 | 109787632 | G | A | A | G | A | G    |
| 12056 | rs3718278   | 9 | 104040283 | G | G | G | A | G | G    |
| 12057 | rs4227892   | 9 | 104049462 | A | A | A | A | A | A    |
| 12058 | rs3727071   | 9 | 104254613 | A | A | A | G | A | A    |
| 12059 | rs3700120   | 9 | 104421801 | A | A | A | G | A | A    |

|       |             |   |           |   |   |   |   |   |   |
|-------|-------------|---|-----------|---|---|---|---|---|---|
| 12060 | rs6231434   | 9 | 104964701 | C | C | C | A | C | C |
| 12061 | rs3653967   | 9 | 104989749 | G | G | G | A | G | G |
| 12062 | rs4227908   | 9 | 105069124 | G | G | G | G | G | G |
| 12063 | rs3657881   | 9 | 105158595 | T | T | T | A | T | T |
| 12064 | rs3671600   | 9 | 105198590 | C | C | C | A | C | C |
| 12065 | rs4138027   | 9 | 105202621 | G | G | G | A | G | G |
| 12066 | rs3711089   | 9 | 105418025 | C | C | C | A | C | A |
| 12067 | rs6205631   | 9 | 105565710 | G | G | G | A | G | G |
| 12068 | rs3669408   | 9 | 105603036 | C | C | C | A | C | C |
| 12069 | rs6299717   | 9 | 105701193 | G | G | G | A | G | G |
| 12070 | mCV22843303 | 9 | 111662570 | C | C | C | A | C | C |
| 12071 | rs6340679   | 9 | 106384935 | A | A | A | G | A | A |
| 12072 | rs3655712   | 9 | 106689165 | G | G | G | A | A | G |
| 12073 | rs3665190   | 9 | 106799213 | A | A | A | G | G | A |
| 12074 | rs3691204   | 9 | 106908224 | G | G | G | A | A | G |
| 12075 | rs6261192   | 9 | 107298613 | A | A | A | G | G | A |
| 12076 | rs3668362   | 9 | 107307044 | A | A | A | T | T | A |
| 12077 | rs4227914   | 9 | 107320673 | A | A | A | A | A | A |
| 12078 | rs3681245   | 9 | 107346437 | G | G | G | A | A | G |
| 12079 | rs3708144   | 9 | 107502860 | G | G | G | A | A | G |
| 12080 | rs3671576   | 9 | 107527677 | C | C | C | A | A | C |
| 12081 | rs8259500   | 9 | 107590813 | G | G | G | A | A | G |
| 12082 | rs8259503   | 9 | 107590963 | A | A | A | G | G | A |
| 12083 | rs3661532   | 9 | 107725331 | G | G | G | A | A | G |
| 12084 | rs3676408   | 9 | 107853273 | T | T | T | A | T | T |
| 12085 | rs6366991   | 9 | 108037887 | A | G | G | G | A | G |
| 12086 | rs6389763   | 9 | 108072043 | A | G | G | G | A | G |
| 12087 | rs8240622   | 9 | 108105904 | C | A | A | A | A | A |
| 12088 | mCV23771355 | 9 | 110866653 | C | A | A | C | C | A |
| 12089 | rs6253244   | 9 | 108807147 | A | G | G | A | G | G |
| 12090 | rs3685576   | 9 | 109064188 | G | G | G | A | G | A |
| 12091 | rs3702106   | 9 | 109071202 | C | C | C | A | C | A |
| 12092 | mCV23375261 | 9 | 111709568 | G | A | A | G | G | A |
| 12093 | rs3655948   | 9 | 109708632 | C | C | C | A | C | C |
| 12094 | rs4227919   | 9 | 110468650 | G | G | G | G | G | G |
| 12095 | rs4227917   | 9 | 110468739 | A | A | A | A | A | A |
| 12096 | rs6285142   | 9 | 110973008 | C | C | C | A | C | C |
| 12097 | rs8240355   | 9 | 111022020 | G | G | G | G | G | G |
| 12098 | rs8240419   | 9 | 111032474 | A | A | A | G | A | A |
| 12099 | rs3723953   | 9 | 111041625 | A | A | A | G | A | A |
| 12100 | rs8254352   | 9 | 111275889 | A | G | G | G | G | G |
| 12101 | rs3703121   | 9 | 111357982 | A | G | G | G | G | G |
| 12102 | rs6405284   | 9 | 111404794 | A | T | T | T | T | T |
| 12103 | rs6248694   | 9 | 111966801 | G | G | G | A | G | G |
| 12104 | rs3720785   | 9 | 111972599 | C | C | C | A | C | C |
| 12105 | rs6242686   | 9 | 112149591 | A | A | A | A | A | A |
| 12106 | rs3665498   | 9 | 112450191 | G | G | G | A | A | G |
| 12107 | rs3672262   | 9 | 112664623 | G | A | A | A | A | A |
| 12108 | rs6380928   | 9 | 113191768 | G | G | G | G | G | G |
| 12109 | rs3690992   | 9 | 113881939 | G | G | G | A | G | G |
| 12110 | rs4227931   | 9 | 113916659 | A | A | A | A | A | A |
| 12111 | rs4227928   | 9 | 113916734 | G | G | G | G | G | G |
| 12112 | rs3721068   | 9 | 113930964 | A | A | A | G | G | A |
| 12113 | rs3694903   | 9 | 114041353 | G | G | G | C | G | G |
| 12114 | rs6346740   | 9 | 114336882 | G | G | G | G | G | G |
| 12115 | rs6328098   | 9 | 114441364 | G | G | G | G | G | G |
| 12116 | rs4227954   | 9 | 114685409 | G | G | G | G | G | G |
| 12117 | rs3711381   | 9 | 115080908 | G | A | A | A | A | A |
| 12118 | rs6320810   | 9 | 115090216 | G | G | G | A | A | G |
| 12119 | rs4227969   | 9 | 115179605 | A | A | A | G | G | G |
| 12120 | rs3678712   | 9 | 115540344 | A | A | A | T | T | A |
| 12121 | rs6298993   | 9 | 115696696 | G | G | G | G | G | G |
| 12122 | mCV23808189 | 9 | 120804310 | A | G | G | A | G | G |
| 12123 | rs3681899   | 9 | 115918856 | A | G | G | G | G | G |
| 12124 | rs4227976   | 9 | 116046157 | G | G | G | G | G | G |
| 12125 | rs3720706   | 9 | 116054148 | G | A | A | G | G | A |
| 12126 | rs6215614   | 9 | 116335300 | A | A | A | A | A | A |
| 12127 | rs3680245   | 9 | 116463718 | G | A | A | A | A | A |
| 12128 | rs3658244   | 9 | 116543959 | A | G | G | A | A | G |
| 12129 | rs3693201   | 9 | 116798643 | A | C | C | A | A | C |
| 12130 | rs3671909   | 9 | 116957934 | A | G | G | G | G | G |
| 12131 | rs3696476   | 9 | 117081293 | G | A | A | G | G | A |
| 12132 | mCV24683863 | 9 | 122369372 | G | G | G | G | G | G |
| 12133 | rs6249627   | 9 | 117535031 | A | A | A | A | A | A |

|       |           |    |           |     |   |   |   |   |     |
|-------|-----------|----|-----------|-----|---|---|---|---|-----|
| 12134 | rs3678853 | 9  | 117710979 | A   | C | C | C | C | C   |
| 12135 | rs3677250 | 9  | 117806172 | A   | G | G | A | A | G   |
| 12136 | rs3669563 | 9  | 117891342 | A   | A | A | G | G | A   |
| 12137 | rs6274904 | 9  | 118154725 | G   | G | G | G | G | G   |
| 12138 | rs3680940 | 9  | 118666767 | A   | G | G | A | A | G   |
| 12139 | rs6237606 | 9  | 118750611 | A   | A | A | A | A | A   |
| 12140 | rs6285865 | 9  | 118792737 | A   | A | A | C | C | A   |
| 12141 | rs6316481 | 9  | 118944837 | T   | T | T | A | A | T   |
| 12142 | rs4227998 | 9  | 119163545 | G   | G | G | G | G | G   |
| 12143 | rs8254361 | 9  | 119308274 | A   | C | C | A | C | C   |
| 12144 | rs8254358 | 9  | 119308443 | G   | A | A | G | A | A   |
| 12145 | rs8254357 | 9  | 119309441 | G   | G | G | G | G | G   |
| 12146 | rs3700085 | 9  | 119643381 | A/C | C | C | C | C | C   |
| 12147 | rs4228038 | 9  | 119789950 | G   | G | G | G | G | G   |
| 12148 | rs6180694 | 9  | 120895707 | C   | C | C | C | C | C   |
| 12149 | rs3687724 | 9  | 120914957 | A   | G | G | A | A | G   |
| 12150 | rs6276199 | 9  | 121648735 | A   | A | A | A | A | A   |
| 12151 | rs6292645 | 9  | 121676387 | G   | A | A | G | G | A   |
| 12152 | rs4228060 | 9  | 121753114 | G   | G | G | G | G | G   |
| 12153 | rs6241431 | 9  | 122806811 | C   | C | C | C | C | C   |
| 12154 | rs4228067 | 9  | 123028091 | A   | A | A | A | A | A   |
| 12155 | rs3088537 | 9  | 123127141 | A   | A | A | A | A | A   |
| 12156 | rs3687856 | 9  | 123188943 | A   | A | A | G | G | A   |
| 12157 | rs3664397 | 9  | 123220498 | A   | A | A | G | G | A   |
| 12158 | rs3665591 | 9  | 123220710 | G   | G | G | A | A | G   |
| 12159 | rs3692532 | 9  | 123225657 | G   | G | G | A | A | G   |
| 12160 | rs3089651 | 9  | 123342714 | G   | G | G | G | G | G   |
| 12161 | rs8241505 | 9  | 123806729 | G   | A | A | A | A | A   |
| 12162 | rs6365534 | 9  | 123812730 | G   | A | A | A | A | A   |
| 12163 | rs8254393 | 9  | 123978813 | G   | A | A | A | G | A   |
| 12164 | rs8254392 | 9  | 123979445 | G   | A | A | A | G | A   |
| 12165 | rs6227097 | 9  | 124046609 | T   | A | A | A | T | A   |
| 12166 | rs8254378 | 9  | 124140321 | A/G | G | G | G | A | A/G |
| 12167 | rs3659525 | X  | 323512    | A   | G | G | A | A | A   |
| 12168 | rs3655710 | X  | 3026      | A   | A | A | G | A | A   |
| 12169 | rs6322925 | X  | 45764783  | G   | C | C | G | C | G   |
| 12170 | rs3725526 | X  | 4019653   | G   | G | A | A | A | A   |
| 12171 | rs6305735 | X  | 4121494   | A   | A | A | A | A | A   |
| 12172 | rs4232460 | X  | 4602733   | T   | T | T | T | T | T   |
| 12173 | rs6209973 | X  | 5164816   | G   | G | G | G | G | G   |
| 12174 | rs3698666 | X  | 5556366   | A   | A | A | A | A | A   |
| 12175 | rs6268289 | X  | 5580451   | G   | G | G | G | G | G   |
| 12176 | rs6410628 | X  | 6287945   | A   | A | A | A | A | A   |
| 12177 | rs3684547 | X  | 7768932   | A   | G | A | G | A | G   |
| 12178 | rs4232464 | X  | 7770032   | G   | G | G | G | G | G   |
| 12179 | rs4232466 | X  | 7987141   | A   | A | A | A | A | A   |
| 12180 | rs4232467 | X  | 7987243   | G   | G | G | G | G | G   |
| 12181 | rs6160438 | X  | 8094879   | G   | G | G | G | G | G   |
| 12182 | rs3722225 | X  | 8183309   | G   | A | G | A | G | A   |
| 12183 | rs3724552 | X  | 8183646   | G   | A | G | A | G | A   |
| 12184 | rs6256688 | X  | 8927969   | G   | G | G | G | G | G   |
| 12185 | rs4232475 | X  | 8928150   | T   | T | T | T | T | T   |
| 12186 | rs6303814 | X  | 10034187  | A   | A | A | A | A | A   |
| 12187 | rs6181710 | X  | 10550753  | G   | G | G | G | G | G   |
| 12188 | rs4223180 | X  | 10984313  | C   | C | C | C | C | C   |
| 12189 | rs6360192 | X  | 11041276  | A   | A | A | A | A | A   |
| 12190 | rs6244254 | X  | 12446718  | A   | A | A | A | A | A   |
| 12191 | rs6366883 | X  | 12885128  | A   | A | A | A | A | A   |
| 12192 | rs3694204 | 13 | 96162947  | C   | A | A | C | A | A   |
| 12193 | rs3088943 | X  | 13668644  | A   | A | A | A | A | A   |
| 12194 | rs3088942 | X  | 13668704  | C   | C | C | C | C | C   |
| 12195 | rs6247454 | X  | 14097107  | A   | A | A | A | A | A   |
| 12196 | rs6261700 | X  | 14749753  | A   | A | A | A | A | A   |
| 12197 | rs6176724 | X  | 15038264  | G   | G | G | G | G | G   |
| 12198 | rs6278020 | X  | 15967319  | C   | C | C | C | C | C   |
| 12199 | rs6235400 | X  | 17376770  | G   | G | G | G | G | G   |
| 12200 | rs6285009 | X  | 18149217  | A   | A | A | A | A | A   |
| 12201 | rs6237014 | X  | 18694367  | G   | G | G | G | G | G   |
| 12202 | rs4232480 | X  | 18851169  | G   | G | G | G | G | G   |
| 12203 | rs4232479 | X  | 18851326  | A   | A | A | A | A | A   |
| 12204 | rs6412008 | X  | 19669478  | G   | G | G | G | G | G   |
| 12205 | rs4232488 | X  | 19819966  | T   | T | T | T | T | T   |
| 12206 | rs6249754 | X  | 20250694  | A   | A | A | A | A | A   |
| 12207 | rs6366200 | X  | 20527383  | G   | G | G | G | G | G   |

|       |           |   |          |   |   |   |   |   |   |
|-------|-----------|---|----------|---|---|---|---|---|---|
| 12208 | rs2020849 | X | 21163322 | G | G | G | G | G | G |
| 12209 | rs6264998 | X | 22051500 | A | A | A | A | A | A |
| 12210 | rs6259015 | X | 28890781 | A | A | A | A | A | A |
| 12211 | rs8237641 | X | 29329656 | A | A | A | A | A | A |
| 12212 | rs8254500 | X | 29340834 | A | A | A | A | A | A |
| 12213 | rs8245805 | X | 29346067 | C | C | C | C | C | C |
| 12214 | rs8245806 | X | 29346131 | G | G | G | G | G | G |
| 12215 | rs8245822 | X | 29349855 | G | G | G | G | G | G |
| 12216 | rs6203233 | X | 29711369 | G | G | G | G | G | G |
| 12217 | rs6319168 | X | 30574121 | A | A | A | A | A | A |
| 12218 | rs6238662 | X | 30872802 | A | A | A | A | A | A |
| 12219 | rs6394815 | X | 31835251 | G | G | G | G | G | G |
| 12220 | rs6224144 | X | 33417227 | G | G | G | G | G | G |
| 12221 | rs6208314 | X | 33915030 | G | G | G | G | G | G |
| 12222 | rs6202387 | X | 34635795 | A | A | A | A | A | A |
| 12223 | rs6185184 | X | 35688896 | A | A | A | A | A | A |
| 12224 | rs6372074 | X | 36481053 | C | C | C | C | C | C |
| 12225 | rs6282846 | X | 37138460 | C | C | C | C | C | C |
| 12226 | rs6210474 | X | 38984640 | T | T | T | T | T | T |
| 12227 | rs6311930 | X | 39669061 | A | A | A | A | A | A |
| 12228 | rs6168118 | X | 40446247 | G | G | A | A | A | G |
| 12229 | rs3089430 | X | 39426983 | A | A | A | A | A | A |
| 12230 | rs8276250 | X | 40459215 | G | G | G | G | G | G |
| 12231 | rs8276255 | X | 40460372 | A | A | A | G | A | A |
| 12232 | rs8276067 | X | 40461839 | G | G | A | A | A | G |
| 12233 | rs8276411 | X | 40484117 | A | A | A | A | A | A |
| 12234 | rs6304294 | X | 41333663 | G | G | G | G | G | G |
| 12235 | rs3699591 | X | 42140821 | G | G | G | A | G | G |
| 12236 | rs6299349 | X | 42234387 | A | A | A | A | A | A |
| 12237 | rs6251933 | X | 43423297 | A | A | A | A | A | A |
| 12238 | rs6373566 | X | 43897207 | A | A | A | A | A | A |
| 12239 | rs3682875 | X | 44211705 | G | G | G | A | G | G |
| 12240 | rs3720681 | X | 44249136 | A | G | G | A | G | A |
| 12241 | rs6243929 | X | 44644574 | G | G | G | G | G | G |
| 12242 | rs3691506 | X | 44833514 | G | A | A | A | A | A |
| 12243 | rs6205800 | X | 45100789 | G | A | A | G | A | A |
| 12244 | rs6270558 | X | 48137806 | A | A | A | A | A | A |
| 12245 | rs6251042 | X | 48436858 | G | G | G | G | G | G |
| 12246 | rs6368704 | X | 49520093 | G | G | G | A | G | G |
| 12247 | rs6410633 | X | 50110770 | A | A | A | A | A | A |
| 12248 | rs6214689 | X | 50896519 | G | G | G | G | G | G |
| 12249 | rs6412756 | X | 51804986 | C | C | C | C | C | C |
| 12250 | rs6349431 | X | 52466625 | A | A | A | A | A | A |
| 12251 | rs6357136 | X | 53852462 | G | G | G | G | G | G |
| 12252 | rs6332369 | X | 55095760 | G | G | G | G | G | G |
| 12253 | rs6356494 | X | 55624743 | G | G | G | G | G | G |
| 12254 | rs3695410 | X | 57115208 | G | A | A | G | G | G |
| 12255 | rs6193526 | X | 57118796 | A | A | A | A | A | A |
| 12256 | rs6153159 | X | 57758758 | T | T | T | T | T | T |
| 12257 | rs6179494 | X | 58243988 | A | A | A | A | A | A |
| 12258 | rs3689473 | X | 58540368 | G | A | A | G | G | G |
| 12259 | rs4138351 | X | 59220713 | G | A | A | G | G | G |
| 12260 | rs6247207 | X | 59416019 | G | G | G | G | G | G |
| 12261 | rs6378383 | X | 60032081 | G | G | G | G | G | G |
| 12262 | rs6243951 | X | 60955670 | A | A | A | A | A | A |
| 12263 | rs3708247 | X | 61074448 | A | T | T | T | A | A |
| 12264 | rs3700359 | X | 61078223 | A | G | G | G | A | A |
| 12265 | rs6211695 | X | 62622256 | G | G | G | G | G | G |
| 12266 | rs3157124 | X | 63007260 | G | G | G | A | G | G |
| 12267 | rs6404038 | X | 63043697 | C | C | C | A | C | C |
| 12268 | rs6312087 | X | 63487587 | C | C | C | C | C | C |
| 12269 | rs6185692 | X | 64346530 | G | G | G | G | G | G |
| 12270 | rs6369810 | X | 64381578 | G | G | G | G | G | G |
| 12271 | rs3683005 | X | 64457236 | A | A | A | A | A | A |
| 12272 | rs4232509 | X | 64471965 | G | G | G | G | G | G |
| 12273 | rs8238970 | X | 64473794 | A | A | A | A | A | A |
| 12274 | rs8251007 | X | 64477468 | G | A | A | G | A | A |
| 12275 | rs4232517 | X | 65052810 | A | A | A | A | A | A |
| 12276 | rs6231337 | X | 65954887 | A | A | A | A | A | A |
| 12277 | rs6218005 | X | 66032641 | G | G | G | G | G | G |
| 12278 | rs6249264 | X | 67333091 | G | G | G | G | G | G |
| 12279 | rs6265042 | X | 67439004 | C | A | A | A | A | C |
| 12280 | rs6344525 | X | 67564830 | A | A | A | A | A | A |
| 12281 | rs4232527 | X | 68382081 | G | G | G | G | G | G |

|       |           |   |           |   |   |   |   |   |   |
|-------|-----------|---|-----------|---|---|---|---|---|---|
| 12282 | rs6400779 | X | 68522167  | G | G | G | G | G | G |
| 12283 | rs3663719 | X | 69021574  | A | A | A | T | A | A |
| 12284 | rs6279227 | X | 69613227  | A | A | A | A | A | A |
| 12285 | rs6212751 | X | 70156558  | A | A | A | A | A | A |
| 12286 | rs6399914 | X | 70953585  | G | G | G | G | G | G |
| 12287 | rs6208405 | X | 71331368  | G | G | G | G | G | G |
| 12288 | rs6268105 | X | 72219902  | G | G | G | G | G | G |
| 12289 | rs6271217 | X | 72886989  | A | A | A | A | A | A |
| 12290 | rs3676526 | X | 73048650  | G | A | A | G | A | G |
| 12291 | rs6291695 | X | 74274957  | G | G | G | G | G | G |
| 12292 | rs6389792 | X | 75325806  | G | G | G | G | G | G |
| 12293 | rs6323789 | X | 75999142  | A | A | A | A | A | A |
| 12294 | rs6311059 | X | 76222069  | G | G | G | G | G | G |
| 12295 | rs3675552 | X | 76437616  | A | C | C | A | C | A |
| 12296 | rs3716132 | X | 76872187  | A | A | A | G | A | G |
| 12297 | rs3664154 | X | 77052880  | A | A | A | G | A | G |
| 12298 | rs6199233 | X | 77419608  | G | G | G | G | G | G |
| 12299 | rs6214040 | X | 77911482  | G | G | G | G | G | G |
| 12300 | rs3696812 | X | 78059793  | G | G | G | A | G | A |
| 12301 | rs6227787 | X | 78650357  | A | A | A | A | A | A |
| 12302 | rs6340046 | X | 79946815  | A | A | A | A | A | A |
| 12303 | rs6315877 | X | 81805810  | A | A | A | A | A | A |
| 12304 | rs3090929 | X | 82281249  | A | A | A | A | A | A |
| 12305 | rs6293628 | X | 82599410  | C | C | C | C | C | C |
| 12306 | rs6403206 | X | 82804409  | A | A | A | A | A | A |
| 12307 | rs6190600 | X | 84111138  | A | A | A | A | A | A |
| 12308 | rs3702254 | X | 84621713  | A | G | G | G | A | G |
| 12309 | rs8266078 | X | 84857768  | A | A | A | A | A | A |
| 12310 | rs8266131 | X | 84927623  | G | G | G | G | G | G |
| 12311 | rs8277807 | X | 85079616  | A | A | A | A | A | A |
| 12312 | rs8277708 | X | 85125811  | G | G | G | G | G | G |
| 12313 | rs8277723 | X | 85135895  | A | G | G | A | A | G |
| 12314 | rs8277725 | X | 85150347  | A | A | A | A | A | A |
| 12315 | rs6274287 | X | 85251266  | A | A | A | A | A | A |
| 12316 | rs3669459 | X | 85285266  | A | G | G | A | A | G |
| 12317 | rs3676174 | X | 86083993  | A | G | G | A | A | G |
| 12318 | rs3712243 | X | 86175046  | T | A | A | T | T | A |
| 12319 | rs6407378 | X | 86188534  | A | A | A | A | A | A |
| 12320 | rs6173395 | X | 86598828  | A | A | A | A | A | A |
| 12321 | rs6380171 | X | 87436208  | G | G | G | G | G | G |
| 12322 | rs3687491 | X | 87673077  | G | G | G | G | G | G |
| 12323 | rs6367841 | X | 88740343  | A | A | A | A | A | A |
| 12324 | rs6282046 | X | 89056545  | G | G | G | G | G | G |
| 12325 | rs6344199 | X | 89607388  | A | A | A | A | A | A |
| 12326 | rs3672400 | X | 89680695  | A | G | G | A | A | G |
| 12327 | rs3680829 | X | 90298561  | A | T | T | A | A | T |
| 12328 | rs6287259 | X | 90765647  | A | A | A | A | A | A |
| 12329 | rs8278084 | X | 90871590  | G | G | G | G | G | G |
| 12330 | rs8278085 | X | 90872000  | A | A | A | A | A | A |
| 12331 | rs6272170 | X | 91795980  | T | T | T | T | T | T |
| 12332 | rs8278385 | X | 92090492  | G | A | A | G | G | A |
| 12333 | rs8278486 | X | 92094330  | C | A | A | C | C | A |
| 12334 | rs8278502 | X | 92095730  | G | A | A | G | G | A |
| 12335 | rs6217048 | X | 92193500  | G | G | G | G | G | G |
| 12336 | rs3090974 | X | 92668315  | G | G | G | G | G | G |
| 12337 | rs4232609 | X | 92671509  | G | G | G | G | G | G |
| 12338 | rs8238299 | X | 92788031  | A | A | A | A | A | A |
| 12339 | rs8238300 | X | 92788590  | G | G | G | G | G | G |
| 12340 | rs6180194 | X | 93306912  | G | G | G | G | G | G |
| 12341 | rs3090486 | X | 95040886  | G | G | G | G | G | G |
| 12342 | rs6213730 | X | 95097387  | G | G | G | A | A | G |
| 12343 | rs4232613 | X | 95102882  | A | A | A | A | A | A |
| 12344 | rs8268113 | X | 95693015  | A | A | A | A | A | A |
| 12345 | rs8268133 | X | 95694824  | C | C | C | C | C | C |
| 12346 | rs8260035 | X | 95741889  | G | G | G | G | G | G |
| 12347 | rs6207541 | X | 97281222  | G | G | G | G | G | G |
| 12348 | rs4232616 | X | 97426331  | A | A | A | A | A | A |
| 12349 | rs8239020 | X | 97431378  | A | A | A | A | A | A |
| 12350 | rs3700575 | X | 97504542  | A | A | A | G | G | A |
| 12351 | rs6245485 | X | 97949296  | A | A | A | A | A | A |
| 12352 | rs6261315 | X | 98329232  | G | G | G | G | G | G |
| 12353 | rs6303914 | X | 99129228  | A | A | A | A | A | A |
| 12354 | rs3654491 | X | 99937059  | G | A | A | A | G | A |
| 12355 | rs6235879 | X | 100138255 | G | G | G | G | G | G |

|       |           |   |           |   |   |   |   |   |   |
|-------|-----------|---|-----------|---|---|---|---|---|---|
| 12356 | rs6364201 | X | 101040049 | G | G | G | G | G | G |
| 12357 | rs6251964 | X | 101963612 | A | A | A | A | A | A |
| 12358 | rs6227618 | X | 102185100 | G | G | G | G | G | G |
| 12359 | rs3722609 | X | 103044021 | C | C | C | C | C | C |
| 12360 | rs3698779 | X | 103921813 | G | A | A | G | G | G |
| 12361 | rs3702093 | X | 103983957 | A | G | G | A | A | A |
| 12362 | rs3719513 | X | 105267232 | G | A | A | G | G | G |
| 12363 | rs6209136 | X | 105322979 | G | A | A | G | G | G |
| 12364 | rs3674730 | X | 105690084 | A | G | G | A | A | A |
| 12365 | rs6231649 | X | 105888859 | G | A | A | G | G | G |
| 12366 | rs3704435 | X | 105967256 | A | G | G | A | A | A |
| 12367 | rs3667940 | X | 106877781 | G | A | A | G | G | G |
| 12368 | rs6413032 | X | 107019102 | A | G | G | A | A | A |
| 12369 | rs3665909 | X | 107631092 | A | G | G | A | A | A |
| 12370 | rs6166961 | X | 107707479 | A | C | C | A | A | A |
| 12371 | rs3690372 | X | 108243347 | A | A | A | G | A | A |
| 12372 | rs6356774 | X | 108350171 | C | A | A | C | C | C |
| 12373 | rs3681080 | X | 108372419 | A | C | C | A | A | A |
| 12374 | rs3686168 | X | 108583426 | A | G | G | A | A | A |
| 12375 | rs3692970 | X | 108588883 | A | G | G | A | A | A |
| 12376 | rs6332633 | X | 109372295 | T | A | A | T | T | T |
| 12377 | rs3718567 | X | 109934187 | G | A | A | G | G | G |
| 12378 | rs6217100 | X | 110493947 | A | A | A | A | A | A |
| 12379 | rs3669031 | X | 111629265 | A | T | T | A | A | A |
| 12380 | rs6196188 | X | 111727814 | G | A | A | G | G | G |
| 12381 | rs6327834 | X | 112407503 | A | G | G | A | A | A |
| 12382 | rs3658628 | X | 112763067 | C | G | G | C | C | C |
| 12383 | rs6263351 | X | 113018181 | A | G | G | A | A | A |
| 12384 | rs6172859 | X | 113940128 | A | G | G | A | A | A |
| 12385 | rs3713761 | X | 117241451 | A | C | C | A | A | A |
| 12386 | rs6314203 | X | 117288552 | A | C | C | A | A | A |
| 12387 | rs6284340 | X | 117403686 | G | A | A | G | G | G |
| 12388 | rs3709341 | X | 117667890 | A | T | T | A | A | A |
| 12389 | rs3670542 | X | 118051351 | G | A | A | G | G | G |
| 12390 | rs6210352 | X | 118105347 | A | G | G | A | A | A |
| 12391 | rs6211820 | X | 119191784 | A | A | A | A | A | A |
| 12392 | rs6202386 | X | 120299930 | A | A | A | A | A | A |
| 12393 | rs6401675 | X | 120479693 | G | G | G | A | G | G |
| 12394 | rs6339460 | X | 121368058 | A | A | A | A | A | A |
| 12395 | rs3666174 | X | 122115392 | A | A | A | C | C | A |
| 12396 | rs6195283 | X | 122179567 | A | A | A | A | A | A |
| 12397 | rs6173173 | X | 123293483 | A | A | A | A | A | A |
| 12398 | rs3661602 | X | 123615734 | A | A | A | G | A | A |
| 12399 | rs6245373 | X | 123718692 | A | A | A | A | A | A |
| 12400 | rs6299904 | X | 124020890 | A | A | A | A | A | A |
| 12401 | rs8237197 | X | 124598445 | C | C | C | C | C | C |
| 12402 | rs8237208 | X | 124602712 | A | A | A | C | A | C |
| 12403 | rs6302291 | X | 124752720 | G | G | G | G | G | G |
| 12404 | rs3702256 | X | 124956381 | G | G | G | A | G | A |
| 12405 | rs3718396 | X | 125967038 | G | G | G | G | G | G |
| 12406 | rs4232640 | X | 126051157 | G | G | G | G | G | G |
| 12407 | rs4151956 | X | 126221781 | G | A | G | A | G | A |
| 12408 | rs6393507 | X | 126654152 | A | A | A | A | A | A |
| 12409 | rs8238559 | X | 126843634 | G | G | G | G | G | G |
| 12410 | rs6268212 | X | 127461421 | G | G | G | G | G | G |
| 12411 | rs6365530 | X | 128389653 | C | C | C | C | C | C |
| 12412 | rs6254399 | X | 129576454 | A | A | A | A | A | A |
| 12413 | rs6271124 | X | 129703240 | G | G | G | G | G | G |
| 12414 | rs6253377 | X | 130971147 | A | A | A | A | A | A |
| 12415 | rs8255331 | X | 131613260 | G | G | G | G | G | G |
| 12416 | rs3719765 | X | 132305239 | A | G | G | G | G | A |
| 12417 | rs6372196 | X | 132644145 | A | A | A | A | A | A |
| 12418 | rs6392118 | X | 132999972 | C | C | C | C | C | C |
| 12419 | rs6344174 | X | 134017418 | G | G | G | G | G | G |
| 12420 | rs6365160 | X | 134443677 | A | A | A | A | A | A |
| 12421 | rs3702041 | X | 135149039 | A | G | G | G | G | G |
| 12422 | rs6379275 | X | 136013589 | A | A | A | A | A | A |
| 12423 | rs6366047 | X | 136273470 | C | C | C | C | C | C |
| 12424 | rs6397905 | X | 136818200 | A | A | A | A | A | A |
| 12425 | rs2020694 | X | 136963817 | A | A | A | A | A | A |
| 12426 | rs6313974 | X | 137455738 | A | A | A | A | A | A |
| 12427 | rs6269954 | X | 140307480 | C | C | C | C | C | C |
| 12428 | rs3662037 | X | 140716207 | A | G | A | A | A | G |
| 12429 | rs4232650 | X | 140790711 | G | G | G | G | G | G |



|       |           |   |           |   |   |   |   |   |   |
|-------|-----------|---|-----------|---|---|---|---|---|---|
| 12430 | rs6160268 | X | 141360024 | G | G | G | G | G | G |
| 12431 | rs6172731 | X | 141807892 | A | A | A | A | A | A |
| 12432 | rs3685112 | X | 143539941 | A | A | A | G | A | A |
| 12433 | rs6291762 | X | 144704684 | G | G | G | G | G | G |
| 12434 | rs8255346 | X | 145129965 | A | A | A | A | A | A |
| 12435 | rs8255343 | X | 145131075 | G | G | G | G | G | G |
| 12436 | rs3705296 | X | 145632182 | T | A | T | T | T | T |
| 12437 | rs6219654 | X | 145708456 | G | G | G | G | G | G |
| 12438 | rs6339238 | X | 146512632 | G | G | G | G | G | G |
| 12439 | rs8255374 | X | 147416073 | G | A | G | G | G | G |
| 12440 | rs8255372 | X | 147416448 | A | C | A | A | A | A |
| 12441 | rs8255364 | X | 147416946 | G | G | G | G | G | G |
| 12442 | rs8255428 | X | 145493676 | A | A | A | A | A | A |
| 12443 | rs6213362 | X | 147525211 | A | A | A | A | A | A |
| 12444 | rs3716904 | X | 147688794 | G | G | G | G | G | G |
| 12445 | rs6225166 | X | 147791915 | G | G | G | G | G | G |
| 12446 | rs4135560 | X | 148598549 | G | G | G | G | G | G |
| 12447 | rs3722862 | X | 148598629 | A | A | A | A | A | A |
| 12448 | rs6280000 | X | 148820241 | A | A | A | A | A | A |
| 12449 | rs6292190 | X | 149281267 | G | G | G | G | G | G |
| 12450 | rs3667080 | X | 149912282 | C | C | C | C | C | C |
| 12451 | rs6154628 | X | 150498545 | G | G | G | G | G | G |
| 12452 | rs6156461 | X | 151286979 | A | A | A | A | A | A |
| 12453 | rs3719291 | X | 151342239 | G | G | G | G | G | G |
| 12454 | rs3719368 | X | 151342278 | A | A | A | A | A | A |
| 12455 | rs6410946 | X | 151695941 | C | C | C | C | C | C |
| 12456 | rs3725586 | X | 152064890 | C | C | C | C | C | C |
| 12457 | rs6380375 | X | 152603815 | A | A | A | A | A | A |
| 12458 | rs6159029 | X | 153185456 | C | C | C | C | C | C |
| 12459 | rs3090488 | X | 153519220 | G | G | G | G | G | G |
| 12460 | rs2020547 | X | 154096126 | C | C | C | C | C | C |
| 12461 | rs6404010 | X | 154136916 | A | A | A | A | A | A |
| 12462 | rs4136868 | X | 154483405 | G | G | G | A | G | G |
| 12463 | rs3721473 | X | 154515779 | A | A | A | G | A | A |
| 12464 | rs6362954 | X | 154541294 | A | A | A | G | A | A |
| 12465 | rs6229527 | X | 154972568 | A | A | A | A | A | A |
| 12466 | rs8255442 | X | 155223720 | A | A | A | A | A | A |
| 12467 | rs3715986 | X | 155494737 | C | C | C | A | C | C |
| 12468 | rs6181649 | X | 156091461 | G | G | G | G | G | G |
| 12469 | rs6237998 | X | 156523757 | C | C | C | C | C | C |
| 12470 | rs3693969 | X | 157230117 | G | G | G | A | G | G |
| 12471 | rs6299123 | X | 157710332 | G | G | G | G | G | G |
| 12472 | rs6216139 | X | 158229294 | G | G | G | G | G | G |
| 12473 | rs6272251 | X | 159085629 | A | A | A | A | A | A |
