# Supplementary material for: DNA variation and brain region-specific expression profiles exhibit different relationships between inbred mouse strains: implications for eQTL mapping studies
Source: PubMed Central journal article supplement (PMC1852412; doi:10.1186/gb-2007-8-2-r25), 2007-02-26
Supplement: gb-2007-8-2-r25-S5.pdf [file gb-2007-8-2-r25-S5.pdf]

**Additional data file 5.** Genomic start and end positions of genes used in the eQTL analysis.

| Gene # | ProbeSet     | Category | Gene Symbol    | EntrezID | Chromosome | Start     | End       | Orientation |
|--------|--------------|----------|----------------|----------|------------|-----------|-----------|-------------|
| 1      | 1436066_at   | Region   | Kalrn          | 545156   | 16         | 32822253  | 32909981  | -           |
| 2      | 1450996_at   | Region   | Fshb           | 14308    | 2          | 106679927 | 106683438 | -           |
| 3      | 1438968_x_at | Region   | Spint2         | 20733    | 7          | 24665189  | 24693522  | -           |
| 4      | 1448647_at   | Region   | Man2a1         | 17158    | 17         | 62303281  | 62457082  | +           |
| 5      | 1418301_at   | Region   | Irf6           | 54139    | 1          | 192891918 | 192910770 | +           |
| 6      | 1434665_at   | Region   | Aga            | 11593    | 8          | 52476596  | 52488292  | +           |
| 7      | 1421812_at   | Region   | None           | None     | 17         | 31623289  | 31633036  | +           |
| 8      | 1426972_at   | Region   | Sec24d         | 69608    | 3          | 122059142 | 122157282 | +           |
| 9      | 1425974_a_at | Region   | Trim25         | 217069   | 11         | 88820567  | 88841380  | +           |
| 10     | 1440371_at   | Region   | None           | None     | X          | 151414698 | 151415426 | -           |
| 11     | 1442113_at   | Region   | 5330417C22Rik  | 229722   | 3          | 108251436 | 108332283 | -           |
| 12     | 1426602_at   | Region   | Araf           | 11836    | X          | 19087538  | 19099458  | +           |
| 13     | 1452861_at   | Region   | 2010300C02Rik  | 72097    | 1          | 37906151  | 38014285  | -           |
| 14     | 1434745_at   | Region   | Ccnd2          | 12444    | 6          | 127802641 | 127824339 | -           |
| 15     | 1448188_at   | Region   | Ucp2           | 22228    | 7          | 94600035  | 94608691  | +           |
| 16     | 1424797_a_at | Region   | Pitx2          | 18741    | 3          | 128131958 | 128151601 | +           |
| 17     | 1435198_at   | Region   | LOC545228      | 545228   | 17         | 83993299  | 83995933  | -           |
| 18     | 1460351_at   | Region   | S100a11        | 20195    | 3          | 93237660  | 93243431  | +           |
| 19     | 1427178_at   | Region   | Tmc4           | 353499   | 7          | 352       | 3277      | -           |
| 20     | 1417010_at   | Region   | Zfp238         | 30928    | 1          | 177382318 | 177388421 | +           |
| 21     | 1433652_at   | Region   | Igsf1          | 209268   | X          | 44303340  | 44318535  | -           |
| 22     | 1434653_at   | Region   | Ptk2b          | 19229    | 14         | 60680682  | 60808472  | -           |
| 23     | 1428116_a_at | Region   | Tctex1         | 21648    | 6          | 136109838 | 136110544 | -           |
| 24     | 1437046_x_at | Region   | 4930504E06Rik  | 75007    | 3          | 94770775  | 94783992  | +           |
| 25     | 1450468_at   | Region   | Myoc           | 17926    | 1          | 162548600 | 162559126 | +           |
| 26     | 1430127_a_at | Region   | Ccnd2          | 12444    | 6          | 127802641 | 127824339 | -           |
| 27     | 1460569_x_at | Region   | Cldn3          | 12739    | 5          | 133999706 | 134000964 | +           |
| 28     | 1423909_at   | Region   | 0610011I04Rik  | 66058    | 6          | 48974286  | 48979812  | +           |
| 29     | 1416122_at   | Region   | Ccnd2          | 12444    | 6          | 127802641 | 127824339 | -           |
| 30     | 1430133_at   | Region   | 4921505D17Rik  | 245638   | X          | 133264640 | 133329485 | +           |
| 31     | 1460591_at   | Region   | Esr1           | 13982    | 10         | 5503826   | 5892641   | -           |
| 32     | 1416210_at   | Region   | Imp3           | 102462   | 9          | 57050989  | 57051887  | +           |
| 33     | 1423948_at   | Region   | Bag2           | 213539   | 1          | 34014433  | 34026712  | -           |
| 34     | 1424650_at   | Region   | Pdia5          | 72599    | 16         | 34186826  | 34272549  | -           |
| 35     | 1452381_at   | Region   | Creb3l2        | 208647   | 6          | 37465296  | 37576712  | -           |
| 36     | 1421088_at   | Region   | Gpc4           | 14735    | X          | 46573716  | 46686048  | -           |
| 37     | 1416687_at   | Region   | Plod2          | 26432    | 9          | 92437061  | 92503040  | +           |
| 38     | 1429175_at   | Region   | 2810417M05Rik  | 68027    | 17         | 78777250  | 78834122  | +           |
| 39     | 1436408_at   | Region   | None           | None     | 11         | 103470663 | 103471671 | +           |
| 40     | 1427005_at   | Region   | Plk2           | 20620    | 13         | 106643742 | 106649524 | +           |
| 41     | 1436796_at   | Region   | 1110061A14Rik  | 68827    | 18         | 35777080  | 35781982  | +           |
| 42     | 1419608_a_at | Region   | Mia1           | 12587    | 7          | 22553265  | 22554674  | -           |
| 43     | 1448698_at   | Region   | Ccnd1          | 12443    | 7          | 139319781 | 139352397 | -           |
| 44     | 1449159_at   | Region   | Gnb3           | 14695    | 6          | 125491008 | 125497043 | -           |
| 45     | 1416579_a_at | Region   | Tacstd1        | 17075    | 17         | 85492970  | 85507589  | +           |
| 46     | 1424089_a_at | Region   | Tcf4           | 21413    | 18         | 69575005  | 69915006  | +           |
| 47     | 1449555_a_at | Region   | Fetub          | 59083    | 16         | 21703696  | 21724542  | +           |
|        |              |          | Hist2h2aa1 /// |          |            |           |           |             |
|        |              |          | Hist1h2ad ///  |          |            |           |           |             |
|        |              |          | Hist1h2an ///  |          |            |           |           |             |
|        |              |          | Hist2h2ab ///  |          |            |           |           |             |
|        |              |          | Hist2h2ac ///  |          |            |           |           |             |
| 48     | 1418367_x_at | Region   | Hist2h2aa2     | 15267    | 3          | 95727548  | 95728125  | -           |
| 49     | 1440418_at   | Region   | None           | None     | 16         | 74494174  | 74494867  | -           |
| 50     | 1433602_at   | Region   | Gabra5         | 110886   | 7          | 51680057  | 51782608  | -           |
| 51     | 1420907_at   | Region   | Cd2ap          | 12488    | 17         | 40292779  | 40376218  | -           |
| 52     | 1455819_at   | Region   | Rod1           | 230257   | 4          | 59418515  | 59492735  | -           |
| 53     | 1416686_at   | Region   | Plod2          | 26432    | 9          | 92437061  | 92503040  | +           |
| 54     | 1434800_at   | Region   | Sv2b           | 64176    | 7          | 69011039  | 69108389  | -           |
| 55     | 1418223_at   | Region   | Sec11l1        | 56529    | 7          | 74718079  | 74750250  | -           |
| 56     | 1425284_a_at | Region   | Rab27a         | 11891    | 9          | 73177546  | 73230218  | +           |
| 57     | 1448255_a_at | Region   | Surf4          | 20932    | 2          | 26852201  | 26866090  | -           |

|     |              |        |               |        |    |           |           |   |
|-----|--------------|--------|---------------|--------|----|-----------|-----------|---|
| 58  | 1419221_a_at | Region | Rgs14         | 51791  | 13 | 53979045  | 53993961  | + |
| 59  | 1449123_at   | Region | Itih3         | 16426  | 14 | 29040621  | 29055592  | - |
| 60  | 1418549_at   | Region | Cga           | 12640  | 4  | 35032846  | 35046441  | + |
| 61  | 1417189_at   | Region | Psme2         | 19188  | 14 | 50105458  | 50109026  | - |
| 62  | 1448372_a_at | Region | Tmem4         | 56530  | 10 | 128059278 | 128064006 | + |
| 63  | 1417083_at   | Region | Sec61b        | 66212  | 4  | 47390583  | 47399155  | + |
| 64  | 1435468_at   | Region | C76566        | 97440  | 8  | 104548267 | 104550781 | - |
| 65  | 1416968_a_at | Region | Hsd3b7        | 101502 | 7  | 121850479 | 121853610 | + |
| 66  | 1426440_at   | Region | Dhrs7         | 66375  | 12 | 69493291  | 69509468  | - |
| 67  | 1433987_at   | Region | Hpcal4        | 170638 | 4  | 122210616 | 122221811 | + |
| 68  | 1418455_at   | Region | Copz2         | 56358  | 11 | 96670963  | 96682290  | + |
| 69  | 1415827_a_at | Region | D3Ucla1       | 28146  | 3  | 58166332  | 58170108  | - |
| 70  | 1436739_at   | Region | Agtr1         | 11607  | 13 | 29816079  | 29862489  | + |
| 71  | 1429058_at   | Region | 1110004B13Rik | 66910  | 11 | 68796467  | 68798950  | + |
| 72  | 1449468_at   | Region | St6galnac5    | 26938  | 3  | 151822396 | 151984720 | - |
| 73  | 1417204_at   | Region | Kdelr2        | 66913  | 5  | 142462591 | 142480033 | + |
| 74  | 1417291_at   | Region | Tnfrsf1a      | 21937  | 6  | 126006435 | 126019164 | + |
| 75  | 1421446_at   | Region | Prkcc         | 18752  | 7  | 3801      | 13486     | - |
| 76  | 1454673_at   | Region | Wasf2         | 242687 | 4  | 132091532 | 132159229 | + |
| 77  | 1448972_at   | Region | Gria1         | 14799  | 11 | 56764801  | 57055873  | + |
| 78  | 1436461_at   | Region | G3bp          | 27041  | 11 | 55238464  | 55253728  | + |
| 79  | 1423294_at   | Region | Mest          | 17294  | 6  | 30786136  | 30794399  | + |
| 80  | 1428184_at   | Region | 3110035E14Rik | 76982  | 1  | 9706059   | 9731934   | + |
| 81  | 1418128_at   | Region | Adcy6         | 11512  | 15 | 98648223  | 98663099  | - |
| 82  | 1449147_at   | Region | Chst1         | 76969  | 2  | 92316460  | 92319933  | + |
| 83  | 1422032_a_at | Region | Za20d3        | 65098  | 7  | 78468968  | 78533265  | - |
| 84  | 1422439_a_at | Region | Cdk4          | 12567  | 10 | 126796334 | 126800114 | + |
| 85  | 1448165_at   | Region | Casp2         | 12366  | 6  | 42408919  | 42426376  | + |
| 86  | 1453473_a_at | Region | Tctex1        | 21648  | 6  | 136109838 | 136110544 | - |
| 87  | 1433696_at   | Region | D17Ert441e    | 52009  | 17 | 22748379  | 22766532  | - |
| 88  | 1432556_a_at | Region | 3100002J23Rik | 75429  | 11 | 58518440  | 58527590  | - |
| 89  | 1448524_s_at | Region | Ssr4          | 20832  | X  | 68447717  | 68451477  | + |
| 90  | 1456241_a_at | Region | 1810073N04Rik | 72055  | 11 | 119925064 | 119972367 | - |
| 91  | 1448989_a_at | Region | Myo1b         | 17912  | 1  | 52050933  | 52208258  | - |
| 92  | 1433795_at   | Region | Tgfb3         | 21814  | 5  | 106170128 | 106359608 | - |
| 93  | 1435748_at   | Region | Gda           | 14544  | 19 | 20622929  | 20710514  | - |
| 94  | 1423422_at   | Region | Asb4          | 65255  | 6  | 5363349   | 5405778   | + |
| 95  | 1448508_at   | Region | Traf3ip2      | 103213 | 10 | 39682835  | 39725209  | + |
| 96  | 1435239_at   | Region | Gria1         | 14799  | 11 | 56764801  | 57055873  | + |
| 97  | 1437687_x_at | Region | Fkbp9         | 27055  | 6  | 56976402  | 57023417  | + |
| 98  | 1451620_at   | Region | C1ql3         | 227580 | 2  | 12919466  | 12927756  | - |
| 99  | 1423537_at   | Region | Gap43         | 14432  | 16 | 41113620  | 41205719  | - |
| 100 | 1424146_at   | Region | Gpr37l1       | 171469 | 1  | 135010513 | 135017687 | - |
| 101 | 1450061_at   | Region | Enc1          | 13803  | 13 | 93429732  | 93441676  | + |
| 102 | 1424037_at   | Region | Itpka         | 228550 | 2  | 119256186 | 119265102 | + |
| 103 | 1419441_at   | Region | Arbp          | 11837  | 5  | 114672398 | 114676611 | + |
|     |              |        | LOC432995 /// |        |    |           |           |   |
| 104 | 1439560_x_at | Region | LOC436333     | 432995 | 16 | 4677092   | 4678091   | + |
| 105 | 1419417_at   | Region | Vegfc         | 22341  | 8  | 53042643  | 53151107  | + |
| 106 | 1422068_at   | Region | Pou3f1        | 18991  | 4  | 123684765 | 123686282 | + |
| 107 | 1435008_at   | Region | Slc9a6        | 236794 | X  | 51364568  | 51416607  | + |
| 108 | 1416723_at   | Region | Tcf4          | 21413  | 18 | 69575005  | 69915006  | + |
| 109 | 1416111_at   | Region | Cd83          | 12522  | 13 | 43347736  | 43365665  | + |
| 110 | 1438478_a_at | Region | Ppp3ca        | 19055  | 3  | 135555655 | 135820664 | + |
| 111 | 1426353_at   | Region | Stat6         | 20852  | 10 | 127343744 | 127397113 | + |
| 112 | 1420928_at   | Region | St6gal1       | 20440  | 16 | 22008076  | 22143979  | + |
| 113 | 1452269_at   | Region | Spnb3         | 20743  | 19 | 4500013   | 4541142   | + |
| 114 | 1429065_at   | Region | 1200009F10Rik | 67454  | 10 | 91054397  | 91073933  | + |
| 115 | 1434436_at   | Region | Morc4         | 75746  | X  | 133366574 | 133416593 | - |
| 116 | 1435807_at   | Region | Cdc42         | 12540  | 4  | 136200964 | 136217395 | - |
| 117 | 1452142_at   | Region | Slc6a1        | 232333 | 6  | 114853331 | 114888000 | + |
| 118 | 1440254_at   | Region | None          | None   | 11 | 106322016 | 106322301 | + |
| 119 | 1436459_at   | Region | Gm208Gpr      | 240888 | 1  | 165217876 | 165243810 | + |
| 120 | 1456175_a_at | Region | Copb2         | 50797  | 9  | 98463089  | 98487733  | + |
| 121 | 1418891_a_at | Region | Rab3d         | 19340  | 9  | 21797512  | 21808123  | - |

|     |              |        |                 |        |    |           |           |   |
|-----|--------------|--------|-----------------|--------|----|-----------|-----------|---|
| 122 | 1418257_at   | Region | Slc12a7         | 20499  | 13 | 69823556  | 69876719  | + |
| 123 | 1451701_x_at | Region | Cldn3           | 12739  | 5  | 133999706 | 134000964 | + |
| 124 | 1433668_at   | Region | Pnrc1           | 108767 | 4  | 33524225  | 33527303  | - |
| 125 | 1436455_at   | Region | Asph            | 65973  | 4  | 9376231   | 9595958   | - |
| 126 | 1435687_at   | Region | Sv2b            | 64176  | 7  | 69011039  | 69108389  | - |
| 127 | 1428808_at   | Region | Prickle2        | 243548 | 6  | 92828179  | 92934188  | - |
| 128 | 1434589_x_at | Region | Surf4           | 20932  | 2  | 26852201  | 26866090  | - |
| 129 | 1455314_at   | Region | Lpp             | 210126 | 16 | 23179019  | 23766559  | + |
| 130 | 1448952_at   | Region | A030009H04Rik   | 80515  | 11 | 69066475  | 69068299  | + |
| 131 | 1417081_a_at | Region | Syngr2          | 20973  | 11 | 117630759 | 117635374 | + |
| 132 | 1450857_a_at | Region | Col1a2          | 12843  | 6  | 4458646   | 4493615   | + |
| 133 | 1417988_at   | Region | Resp18          | 19711  | 1  | 75562843  | 75569393  | - |
| 134 | 1426555_at   | Region | Scpep1          | 74617  | 11 | 88745107  | 88776519  | - |
| 135 | 1415996_at   | Region | Txnip           | 56338  | 3  | 96045794  | 96049702  | + |
| 136 | 1431036_a_at | Region | 1110032D12Rik   | 56334  | 5  | 123712134 | 123721846 | + |
| 137 | 1435577_at   | Region | Dab1            | 13131  | 4  | 103326495 | 103639279 | + |
| 138 | 1421928_at   | Region | Epha4           | 13838  | 1  | 77656420  | 77802175  | - |
| 139 | 1451935_a_at | Region | Spint2          | 20733  | 7  | 24665189  | 24693522  | - |
| 140 | 1419420_at   | Region | St6galnac5      | 26938  | 3  | 151822396 | 151984720 | - |
| 141 | 1447854_s_at | Region | Hist2h2be       | 319190 | 3  | 95756526  | 95756936  | + |
| 142 | 1454672_at   | Region | None            | None   | 14 | 62616664  | 62617535  | + |
| 143 | 1428645_at   | Region | Gnai3           | 14679  | 3  | 107903041 | 107941856 | - |
| 144 | 1442226_at   | Region | 6430702L12      | 330043 | 5  | 13709045  | 13709820  | + |
| 145 | 1453572_a_at | Region | Plp2            | 18824  | X  | 5906886   | 5910272   | - |
| 146 | 1454821_at   | Region | B3gat1          | 76898  | 9  | 26645461  | 26655237  | + |
| 147 | 1428473_at   | Region | Ppp3cb          | 19056  | 14 | 18861352  | 18907856  | - |
| 148 | 1419493_a_at | Region | Tpd52           | 21985  | 3  | 78893581  | 78895590  | - |
| 149 | 1423025_a_at | Region | Schip1          | 30953  | 3  | 68244719  | 68298773  | + |
| 150 | 1435524_at   | Region | 2010109N14Rik   | 69895  | 3  | 122299262 | 122300033 | - |
| 151 | 1452969_at   | Region | Atp2b1          | 67972  | 10 | 98895589  | 99006572  | + |
|     |              |        | Krt2-8 ///      |        |    |           |           |   |
| 152 | 1420647_a_at | Region | LOC434261       | 16691  | 15 | 102056071 | 102063643 | - |
| 153 | 1436383_at   | Region | Cplx2           | 12890  | 13 | 52985707  | 52986681  | + |
| 154 | 1452031_at   | Region | Slc1a3          | 20512  | 15 | 8424368   | 8500974   | - |
| 155 | 1449278_at   | Region | Eif2ak3         | 13666  | 6  | 71164646  | 71236239  | + |
| 156 | 1417797_a_at | Region | 1810019J16Rik   | 69073  | 4  | 132488828 | 132491689 | + |
| 157 | 1448154_at   | Region | Ndrg2           | 29811  | 14 | 46999704  | 47007774  | - |
| 158 | 1441165_s_at | Region | Clstn2          | 64085  | 9  | 97343753  | 97483061  | - |
| 159 | 1439662_at   | Region | Homer1          | 26556  | 13 | 89489518  | 89588558  | + |
| 160 | 1424594_at   | Region | None            | None   | 14 | 42185149  | 42186364  | + |
| 161 | 1418447_at   | Region | Golga5          | 27277  | 12 | 97914676  | 97942915  | + |
| 162 | 1434877_at   | Region | Nptx1           | 18164  | 11 | 119360465 | 119368918 | - |
| 163 | 1435717_at   | Region | 4833428C12Rik   | 399589 | 3  | 114709474 | 114710958 | - |
| 164 | 1418317_at   | Region | Lhx2            | 16870  | 2  | 38283470  | 38301890  | + |
| 165 | 1455111_at   | Region | A430107J06Rik   | 77929  | X  | 93539141  | 93548434  | + |
| 166 | 1439489_at   | Region | Gpr120          | 107221 | 19 | 37440882  | 37458066  | + |
| 167 | 1418171_at   | Region | Tceal8          | 66684  | X  | 129715020 | 129717144 | - |
| 168 | 1452754_at   | Region | 5730592L21Rik   | 76737  | 15 | 88871575  | 88878610  | + |
| 169 | 1417799_at   | Region | Atp6v1g2        | 66237  | 17 | 32939454  | 32942611  | + |
| 170 | 1428715_at   | Region | 2810423A18Rik   | 72178  | 6  | 87523695  | 87526542  | + |
| 171 | 1452841_at   | Region | Pgm211          | 70974  | 7  | 94334296  | 94382030  | + |
| 172 | 1418497_at   | Region | Fgf13           | 14168  | X  | 53816864  | 53889150  | - |
| 173 | 1418357_at   | Region | Foxg1           | 15228  | 12 | 46129076  | 46132757  | + |
| 174 | 1434638_at   | Region | None            | None   | 16 | 9241510   | 9242025   | - |
| 175 | 1435227_at   | Region | None            | None   | 12 | 103383814 | 103385237 | - |
| 176 | 1424176_a_at | Region | Anxa4           | 11746  | 6  | 87171158  | 87227870  | - |
| 177 | 1428130_at   | Region | Lman1           | 70361  | 18 | 66213875  | 66235740  | - |
| 178 | 1434672_at   | Region | Gpr22           | 73010  | 12 | 28281559  | 28288571  | - |
| 179 | 1435429_x_at | Region | Rps27l          | 67941  | 9  | 67073432  | 67076878  | + |
| 180 | 1453317_a_at | Region | Khdrbs3         | 13992  | 15 | 68952956  | 69118055  | + |
| 181 | 1449930_a_at | Region | Ssr2            | 66256  | 3  | 88323535  | 88332277  | + |
| 182 | 1416695_at   | Region | Bzrp            | 12257  | 15 | 83612210  | 83636054  | + |
| 183 | 1416772_at   | Region | Cpt2            | 12896  | 4  | 106862887 | 106882439 | - |
| 184 | 1428335_a_at | Region | Scfd1           | 76983  | 12 | 48128993  | 48201414  | + |
| 185 | 1452357_at   | Region | Gp1bb /// Sept5 | 14724  | 16 | 17391369  | 17393453  | - |

|     |              |        |               |        |    |           |           |   |
|-----|--------------|--------|---------------|--------|----|-----------|-----------|---|
| 186 | 1425176_at   | Region | C1ql3         | 227580 | 2  | 12919466  | 12927756  | - |
| 187 | 1418315_at   | Region | Nr5a1         | 26423  | 2  | 38624789  | 38646665  | - |
| 188 | 1458268_s_at | Region | Igfbp3        | 16009  | 11 | 7103173   | 7108623   | - |
| 189 | 1451814_a_at | Region | Htatif2       | 53415  | 7  | 43873263  | 43888105  | + |
| 190 | 1417348_at   | Region | 2310039H08Rik | 67101  | 17 | 44283562  | 44284322  | + |
| 191 | 1427611_at   | Region | Ghrhr         | 14602  | 6  | 55520687  | 55532644  | + |
| 192 | 1437807_x_at | Region | Ctnna1        | 12385  | 18 | 35342570  | 35478433  | + |
| 193 | 1428269_a_at | Region | Glt8d1        | 76485  | 14 | 29133655  | 29143945  | + |
| 194 | 1448577_x_at | Region | Syngn2        | 20973  | 11 | 117630759 | 117635374 | + |
| 195 | 1423489_at   | Region | Mmd           | 67468  | 11 | 90070563  | 90099660  | + |
| 196 | 1448240_at   | Region | Mbtps1        | 56453  | 8  | 118850260 | 118901165 | - |
| 197 | 1434990_at   | Region | Ppm1e         | 320472 | 11 | 86954898  | 87086986  | - |
| 198 | 1452766_at   | Region | 2900041A09Rik | 72948  | 13 | 70069808  | 70096083  | + |
| 199 | 1416852_a_at | Region | Ncdn          | 26562  | 4  | 125770868 | 125780472 | - |
| 200 | 1433883_at   | Region | Tpm4          | 326618 | 8  | 71293472  | 71311309  | + |
| 201 | 1440442_at   | Region | Map2k7        | 26400  | 8  | 3593945   | 3601130   | + |
| 202 | 1451558_at   | Region | Fbxw7         | 50754  | 3  | 84695316  | 84720739  | + |
| 203 | 1458622_at   | Region | Ntrk2         | 18212  | 13 | 57448390  | 57572946  | + |
| 204 | 1436204_at   | Region | 1110059G02Rik | 68786  | 15 | 55640894  | 55642196  | - |
| 205 | 1425558_at   | Region | Klc3          | 232943 | 7  | 16263684  | 16269100  | - |
| 206 | 1450435_at   | Region | L1cam         | 16728  | X  | 68515690  | 68530459  | - |
| 207 | 1423280_at   | Region | Stmn2         | 20257  | 3  | 8496587   | 8548309   | + |
| 208 | 1437640_at   | Region | 6430704M03Rik | 230235 | 4  | 56903585  | 56933806  | - |
| 209 | 1455897_x_at | Region | Hmgn1         | 15312  | 16 | 95558992  | 95565130  | - |
| 210 | 1423173_at   | Region | Napb          | 17957  | 2  | 148151593 | 148189356 | - |
| 211 | 1435196_at   | Region | Ntrk2         | 18212  | 13 | 57448390  | 57572946  | + |
| 212 | 1452648_at   | Region | Tbrg1         | 21376  | 9  | 37590683  | 37598845  | - |
| 213 | 1448792_a_at | Region | Cyp2f2        | 13107  | 7  | 22492659  | 22506466  | + |
| 214 | 1435260_at   | Region | Sdccag8       | 76816  | 1  | 176747373 | 176953729 | + |
| 215 | 1436050_x_at | Region | Hes6          | 55927  | 1  | 91234525  | 91236264  | - |
| 216 | 1457440_at   | Region | Sstr4         | 20608  | 2  | 147852278 | 147857879 | + |
| 217 | 1456535_at   | Region | Vps13c        | 320528 | 9  | 67968941  | 68123713  | + |
| 218 | 1435614_s_at | Region | Rasgrf1       | 19417  | 9  | 89795814  | 89912965  | + |
| 219 | 1438310_at   | Region | Dgkh          | 380921 | 14 | 72922487  | 72981706  | - |
| 220 | 1415885_at   | Region | Chgb          | 12653  | 2  | 132295525 | 132308929 | + |
| 221 | 1455027_at   | Region | D5Bwg0860e    | 52822  | 5  | 87850046  | 87908952  | + |
| 222 | 1455925_at   | Region | Prdm8         | 77630  | 5  | 97200607  | 97206966  | + |
| 223 | 1434590_at   | Region | B230209C24Rik | 320705 | 1  | 34121165  | 34176734  | - |
| 224 | 1433855_at   | Region | Abat          | 268860 | 16 | 8186782   | 8294861   | + |
| 225 | 1418054_at   | Region | Neurod4       | 11923  | 10 | 130003660 | 130015733 | - |
| 226 | 1449921_s_at | Region | Cpne6         | 12891  | 14 | 50028892  | 50034962  | + |
| 227 | 1440015_at   | Region | None          | None   | 18 | 69919011  | 69919744  | + |
| 228 | 1460248_at   | Region | Cpxm2         | 55987  | 7  | 126406479 | 126517151 | - |
| 229 | 1419515_at   | Region | Fgd2          | 26382  | 17 | 27174554  | 27193416  | + |
| 230 | 1438589_at   | Region | Igsf1         | 209268 | X  | 44303340  | 44318535  | - |
| 231 | 1452717_at   | Region | Slc25a24      | 229731 | 3  | 108918891 | 108977474 | + |
| 232 | 1419028_at   | Region | MGI:107562    | 74100  | 9  | 112222231 | 112229149 | - |
| 233 | 1438953_at   | Region | None          | None   | X  | 158000068 | 158000375 | + |
| 234 | 1418090_at   | Region | Plvap         | 84094  | 8  | 70647571  | 70660944  | - |
| 235 | 1437405_a_at | Region | Igfbp4        | 16010  | 11 | 98862347  | 98873733  | + |
| 236 | 1457273_at   | Region | Odz2          | 23964  | 11 | 35801678  | 36738275  | - |
| 237 | 1424507_at   | Region | Rin1          | 225870 | 19 | 4839598   | 4845861   | + |
| 238 | 1445691_at   | Region | Chn1          | 108699 | 2  | 73308494  | 73358115  | - |
| 239 | 1460460_a_at | Region | Gorasp2       | 70231  | 2  | 70359319  | 70389486  | + |
| 240 | 1416656_at   | Region | Clic1         | 114584 | 17 | 32754023  | 32762499  | + |
| 241 | 1449470_at   | Region | Dlx1          | 13390  | 2  | 71227188  | 71231723  | + |
| 242 | 1417738_at   | Region | Rab25         | 53868  | 3  | 88285893  | 88292143  | - |
| 243 | 1418314_a_at | Region | MGI:1926224   | 268859 | 16 | 6740061   | 7081334   | + |
| 244 | 1417568_at   | Region | Ncald         | 52589  | 15 | 37371112  | 37797344  | - |
| 245 | 1428267_at   | Region | Dhx40         | 67487  | 11 | 86497746  | 86535629  | - |
| 246 | 1423147_at   | Region | Mat1a         | 11720  | 14 | 39252260  | 39271291  | + |
| 247 | 1415700_a_at | Region | Ssr3          | 67437  | 3  | 65053089  | 65065985  | - |
| 248 | 1453159_at   | Region | Efhc1         | 71877  | 1  | 21165300  | 21215777  | + |
| 249 | 1435749_at   | Region | Gda           | 14544  | 19 | 20622929  | 20710514  | - |
| 250 | 1428384_at   | Region | D4Bwg0951e    | 52829  | 4  | 79909879  | 79953494  | + |

|                     |              |        |                      |        |    |           |           |   |
|---------------------|--------------|--------|----------------------|--------|----|-----------|-----------|---|
| 251                 | 1449956_at   | Region | Prkce                | 18754  | 17 | 83996500  | 84488821  | + |
| 252                 | 1441785_at   | Region | None                 | None   | 11 | 65938319  | 65938627  | - |
| 253                 | 1427295_at   | Region | 1810073N04Rik        | 72055  | 11 | 119925064 | 119972367 | - |
| 254                 | 1450863_a_at | Region | Dcamk1               | 13175  | 3  | 54876964  | 55171014  | + |
| 255                 | 1435453_at   | Region | A930011O12Rik        | 268755 | 14 | 59116823  | 59121198  | + |
| 256                 | 1423269_a_at | Region | Nedd4l               | 83814  | 18 | 65256461  | 65446324  | + |
| 257                 | 1422583_at   | Region | Rab3b                | 69908  | 4  | 107837975 | 107902229 | + |
| 258                 | 1435179_at   | Region | C130071C03Rik        | 320203 | 13 | 79834708  | 79837961  | + |
| 259                 | 1433857_at   | Region | Fath                 | 14107  | 8  | 43895563  | 43999658  | + |
| 260                 | 1422440_at   | Region | Cdk4                 | 12567  | 10 | 126796334 | 126800114 | + |
| H2-T10 /// H2-T17   |              |        |                      |        |    |           |           |   |
| 261                 | 1449875_s_at | Region | /// H2-T22 /// H2-T9 | 15024  | 17 | 33860368  | 33864725  | - |
| 262                 | 1418072_at   | Region | Hist1h2bc            | 68024  | 13 | 23164082  | 23172357  | + |
| 263                 | 1415836_at   | Region | Aldh18a1             | 56454  | 19 | 40094578  | 40132690  | - |
| 264                 | 1460038_at   | Region | Pou3f1               | 18991  | 4  | 123684765 | 123686282 | + |
| 265                 | 1434893_at   | Region | Atp1a2               | 98660  | 1  | 172203449 | 172226896 | - |
| 266                 | 1451091_at   | Region | Txndc5               | 105245 | 13 | 38041006  | 38069191  | - |
| 267                 | 1417068_a_at | Region | Ptpn1                | 19246  | 2  | 167396315 | 167485652 | + |
| 268                 | 1441069_at   | Region | None                 | None   | 16 | 42848367  | 42848933  | - |
| 269                 | 1425833_a_at | Region | Hpca                 | 15444  | 4  | 128138688 | 128145871 | - |
| 270                 | 1418488_s_at | Region | Ripk4                | 72388  | 16 | 97226242  | 97248055  | - |
| 271                 | 1423940_at   | Region | Yif1                 | 68090  | 19 | 4877343   | 4881646   | + |
| 272                 | 1452966_at   | Region | 9130430L19Rik        | 77672  | 12 | 103381656 | 103382878 | - |
| 273                 | 1421863_at   | Region | Vamp1                | 22317  | 6  | 125872261 | 125878983 | + |
| 274                 | 1424068_at   | Region | Tcta                 | 102791 | 9  | 108372719 | 108375712 | - |
| 275                 | 1418047_at   | Region | Neurod6              | 11922  | 6  | 55822148  | 55825394  | - |
| 276                 | 1415741_at   | Region | Tparl                | 21982  | 5  | 75429189  | 75454483  | + |
| 277                 | 1455572_x_at | Region | Rps18                | 20084  | 17 | 31655742  | 31659385  | - |
| 278                 | 1437277_x_at | Region | Tgm2                 | 21817  | 2  | 157573374 | 157603361 | - |
| 279                 | 1426276_at   | Region | Ifih1                | 71586  | 2  | 62452850  | 62501560  | - |
| 280                 | 1415904_at   | Region | Lpl                  | 16956  | 8  | 68029951  | 68056194  | + |
| 281                 | 1422497_at   | Region | Slc30a5              | 69048  | 13 | 96973291  | 96984964  | + |
| 282                 | 1431980_a_at | Region | As3mt                | 57344  | 19 | 46254334  | 46291500  | + |
| 283                 | 1435487_at   | Region | Grid2                | 14804  | 6  | 64146694  | 64904112  | + |
| 284                 | 1417870_x_at | Region | Ctsz                 | 64138  | 2  | 173852401 | 173863899 | - |
| 285                 | 1424891_a_at | Region | Zw10                 | 26951  | 9  | 49086054  | 49109318  | + |
| 286                 | 1419811_at   | Region | D16Wsu65e            | 28001  | 16 | 3956182   | 3956737   | - |
| 287                 | 1422491_a_at | Region | Bnip2                | 12175  | 9  | 70120357  | 70139177  | + |
| 288                 | 1434148_at   | Region | Tcf4                 | 21413  | 18 | 69575005  | 69915006  | + |
| 289                 | 1416856_at   | Region | 3230401D17Rik        | 66680  | 2  | 162862791 | 162876439 | - |
| 290                 | 1423277_at   | Region | Ptprk                | 19272  | 10 | 28105024  | 28627423  | + |
| 291                 | 1426163_x_at | Region | Rpl7                 | 19989  | 1  | 16284751  | 16287861  | - |
| 292                 | 1426815_s_at | Region | AU024582             | 227648 | 2  | 26341598  | 26360508  | - |
| 293                 | 1420127_s_at | Region | Ccpg1                | 72278  | 9  | 73118338  | 73148795  | + |
| 294                 | 1443865_at   | Region | Gabra2               | 14395  | 5  | 69741965  | 69877243  | - |
| 295                 | 1416803_at   | Region | Fkbp7                | 14231  | 2  | 76360793  | 76370819  | - |
| 296                 | 1458662_at   | Region | Daam1                | 208846 | 12 | 68668036  | 68829803  | + |
| H2-D1 /// H2-K1 /// |              |        |                      |        |    |           |           |   |
| 297                 | 1451784_x_at | Region | H2-L /// LOC56628    | 14964  | 17 | 186801    | 249200    | - |
| 298                 | 1416942_at   | Region | MGI:1933403          | 80898  | 13 | 70696832  | 70749086  | + |
| 299                 | 1418890_a_at | Region | Rab3d                | 19340  | 9  | 21797512  | 21808123  | - |
| 300                 | 1435842_at   | Region | 1110038O08Rik        | 68762  | 5  | 32493703  | 32494179  | + |
| 301                 | 1428129_at   | Region | Lman1                | 70361  | 18 | 66213875  | 66235740  | - |
| 302                 | 1460573_at   | Region | Al848100             | 226551 | 1  | 161723956 | 161783029 | - |
| 303                 | 1420011_s_at | Region | Xbp1                 | 22433  | 11 | 5415754   | 5420659   | + |
| 304                 | 1452752_at   | Region | None                 | None   | 4  | 118191815 | 118207883 | + |
| 305                 | 1437845_x_at | Region | Pofut2               | 80294  | 10 | 77370658  | 77380047  | + |
| 306                 | 1419517_at   | Region | Cnih3                | 72978  | 1  | 181306443 | 181413724 | + |
| 307                 | 1423183_at   | Region | Lgi1                 | 56839  | 19 | 37608585  | 37652742  | + |
| 308                 | 1426852_x_at | Region | Nov                  | 18133  | 15 | 54747888  | 54755722  | + |
| 309                 | 1433711_s_at | Region | Sesn1                | 140742 | 10 | 42001833  | 42014167  | + |
| 310                 | 1429625_at   | Region | 2900054C01Rik        | 73049  | X  | 154400797 | 154403368 | - |
| 311                 | 1437325_x_at | Region | Aldh18a1             | 56454  | 19 | 40094578  | 40132690  | - |
| 312                 | 1436323_at   | Region | 2810001A02Rik        | 72146  | 15 | 86264501  | 86265270  | - |

|     |              |        |                   |        |    |           |           |   |
|-----|--------------|--------|-------------------|--------|----|-----------|-----------|---|
| 313 | 1451129_at   | Region | Calb2             | 12308  | 8  | 109440214 | 109465416 | - |
| 314 | 1423720_a_at | Region | Sara1             | 20224  | 10 | 61646625  | 61659601  | + |
| 315 | 1433509_s_at | Region | D6ErtD253e        | 52250  | 6  | 72039837  | 72142679  | + |
| 316 | 1450769_s_at | Region | Stard5            | 170460 | 7  | 77488447  | 77498758  | + |
| 317 | 1418883_a_at | Region | Pabpc1            | 18458  | 15 | 36597339  | 36610638  | - |
| 318 | 1427086_at   | Region | None              | None   | 11 | 35494444  | 35506061  | + |
| 319 | 1420955_at   | Region | Vsnl1             | 26950  | 12 | 10678693  | 10740412  | - |
| 320 | 1428460_at   | Region | Syn2              | 20965  | 6  | 115570293 | 115710479 | + |
| 321 | 1434914_at   | Region | Rab6b             | 270192 | 9  | 103083792 | 103160522 | + |
| 322 | 1433443_a_at | Region | Hmgcs1            | 208715 | 13 | 114526    | 140291    | - |
| 323 | 1423358_at   | Region | 1810009K13Rik     | 66275  | 16 | 19383742  | 19391148  | + |
| 324 | 1449109_at   | Region | Socs2             | 216233 | 10 | 95388906  | 95391737  | - |
| 325 | 1418576_at   | Region | Yipf5             | 67180  | 18 | 40429229  | 40443156  | - |
| 326 | 1418749_at   | Region | BC003498          | 80295  | 8  | 66796365  | 66798946  | - |
| 327 | 1428650_at   | Region | Tns1              | 21961  | 1  | 74217097  | 74291359  | - |
| 328 | 1419371_s_at | Region | Gosr2             | 56494  | 11 | 103497948 | 103518783 | - |
| 329 | 1433583_at   | Region | Zfp365            | 216049 | 10 | 67941416  | 67966217  | - |
| 330 | 1448468_a_at | Region | Kcnab1            | 16497  | 3  | 64782663  | 65051651  | + |
| 331 | 1419360_a_at | Region | Ss18              | 268996 | 18 | 14813890  | 14871175  | - |
| 332 | 1447167_at   | Region | None              | None   | 6  | 28576425  | 28576934  | + |
| 333 | 1418538_at   | Region | Kdelr3            | 105785 | 15 | 79569021  | 79580297  | + |
| 334 | 1416328_a_at | Region | Atp6v0e           | 11974  | 17 | 24471230  | 24494471  | + |
| 335 | 1436364_x_at | Region | Nfix              | 18032  | 8  | 83974112  | 84039256  | - |
| 336 | 1452938_at   | Region | C030032C09Rik     | 77531  | 10 | 90548071  | 90943317  | + |
| 337 | 1441072_at   | Region | Cugbp2            | 14007  | 2  | 6459141   | 6638885   | - |
| 338 | 1435032_at   | Region | Golgb1            | 224139 | 16 | 35692672  | 35750683  | + |
| 339 | 1420113_s_at | Region | 2410022L05Rik     | 66423  | 8  | 13263410  | 13268885  | - |
| 340 | 1454832_at   | Region | Phactr1           | 218194 | 13 | 42242828  | 42700966  | + |
| 341 | 1429225_at   | Region | 6330417K15Rik     | 70740  | 4  | 85969316  | 85971036  | - |
| 342 | 1449104_at   | Region | Upk3a             | 22270  | 15 | 85065819  | 85071133  | + |
| 343 | 1418152_at   | Region | Nsbp1             | 50887  | X  | 103605900 | 103614724 | - |
| 344 | 1434670_at   | Region | Kif5a             | 16572  | 10 | 126965001 | 126999707 | - |
| 345 | 1426855_at   | Region | D10ErtD610e       | 52666  | 10 | 126915321 | 126923060 | - |
| 346 | 1454388_at   | Region | 2900046F13Rik     | 73028  | 2  | 6962824   | 6963892   | - |
| 347 | 1438443_at   | Region | Zbtb20            | 56490  | 16 | 42442156  | 42491541  | + |
| 348 | 1436631_at   | Region | 2010010M04Rik     | 66546  | 18 | 35406149  | 35406816  | + |
| 349 | 1452878_at   | Region | Prkce             | 18754  | 17 | 83996500  | 84488821  | + |
| 350 | 1427308_at   | Region | Dab1              | 13131  | 4  | 103326495 | 103639279 | + |
| 351 | 1422085_at   | Region | Tbx19             | 83993  | 1  | 165060565 | 165083707 | - |
|     |              |        | 0610007P22Rik /// |        |    |           |           |   |
| 352 | 1427509_at   | Region | Gm937             | 545192 | 17 | 23049489  | 23062900  | - |
| 353 | 1420871_at   | Region | Gucy1b3           | 54195  | 3  | 81761066  | 81803745  | - |
| 354 | 1457979_at   | Region | None              | None   | 8  | 14231566  | 14231903  | + |
| 355 | 1427247_at   | Region | D3Bwg0562e        | 229791 | 3  | 116093000 | 116134735 | - |
| 356 | 1417005_at   | Region | Kns2              | 16593  | 12 | 107239749 | 107276237 | + |
| 357 | 1454899_at   | Region | Lpp               | 210126 | 16 | 23179019  | 23766559  | + |
| 358 | 1457412_at   | Region | None              | None   | 15 | 101102806 | 101103468 | + |
| 359 | 1421399_at   | Region | Insm1             | 53626  | 2  | 145679042 | 145681349 | + |
| 360 | 1455238_at   | Region | Mum11i            | 245631 | X  | 132779924 | 132783271 | + |
| 361 | 1427746_x_at | Region | H2-K1             | 14972  | 17 | 32967489  | 33050036  | + |
| 362 | 1420925_at   | Region | Tub               | 22141  | 7  | 102863841 | 102883914 | + |
| 363 | 1417858_at   | Region | Rasal1            | 19415  | 5  | 119800629 | 119831400 | + |
| 364 | 1423898_a_at | Region | Trip12            | 14897  | 1  | 85055153  | 85095994  | - |
| 365 | 1435210_s_at | Region | Snph              | 241727 | 2  | 151047486 | 151089469 | - |
| 366 | 1425656_a_at | Region | Baiap2            | 108100 | 11 | 119764194 | 119822580 | + |
| 367 | 1416589_at   | Region | Sparc             | 20692  | 11 | 55147342  | 55172707  | - |
| 368 | 1425567_a_at | Region | Anxa5             | 11747  | 3  | 35912528  | 35939301  | - |
| 369 | 1436452_x_at | Region | 1110032D12Rik     | 56334  | 5  | 123712134 | 123721846 | + |
| 370 | 1450895_a_at | Region | 1810020G14Rik     | 66272  | 12 | 78331960  | 78346366  | - |
| 371 | 1434881_s_at | Region | Kctd12            | 239217 | 14 | 97521013  | 97526010  | - |
| 372 | 1425545_x_at | Region | H2-D1 /// H2-L    | 14964  | 17 | 186801    | 249200    | - |
| 373 | 1450888_at   | Region | Napb              | 17957  | 2  | 148151593 | 148189356 | - |
| 374 | 1437865_at   | Region | Spata13           | 219140 | 14 | 55169182  | 55299693  | + |
| 375 | 1426944_at   | Region | Fbxw8             | 231672 | 5  | 117193645 | 117284031 | - |
| 376 | 1435494_s_at | Region | Dsp               | 109620 | 13 | 37690386  | 37736832  | + |

|     |              |        |               |        |    |           |           |   |
|-----|--------------|--------|---------------|--------|----|-----------|-----------|---|
| 377 | 1435940_at   | Region | Al836758      | 99719  | 3  | 55172671  | 55173405  | + |
| 378 | 1436076_at   | Region | Dlgap1        | 224997 | 17 | 68195196  | 68591524  | + |
| 379 | 1450723_at   | Region | Isl1          | 16392  | 13 | 112748913 | 112760636 | - |
| 380 | 1441107_at   | Region | Dmrta2        | 242620 | 4  | 108936958 | 108942589 | + |
| 381 | 1416713_at   | Region | 2700055K07Rik | 67971  | 8  | 104763120 | 104766994 | - |
| 382 | 1416149_at   | Region | Olig1         | 50914  | 16 | 90426805  | 90428975  | + |
| 383 | 1424595_at   | Region | F11r          | 16456  | 1  | 171366400 | 171393432 | + |
| 384 | 1433465_a_at | Region | Al467606      | 101602 | 7  | 121141167 | 121143780 | + |
| 385 | 1426729_at   | Region | 2900046G09Rik | 78408  | 16 | 19467198  | 19475177  | + |
| 386 | 1452026_a_at | Region | Pla2g12a      | 66350  | 3  | 128811504 | 128828682 | + |
| 387 | 1423287_at   | Region | Cbln1         | 12404  | 8  | 86752336  | 86755765  | - |
| 388 | 1424701_at   | Region | Pcdh20        | 219257 | 14 | 19456     | 24795     | + |
| 389 | 1453118_s_at | Region | Rpl22         | 19934  | 4  | 150818238 | 150826433 | + |
| 390 | 1428963_at   | Region | Rwdd2         | 69519  | 9  | 86914382  | 86917225  | + |
| 391 | 1428434_at   | Region | Zcchc12       | 72693  | X  | 30816542  | 30819704  | + |
| 392 | 1441870_s_at | Region | Pkd2          | 18764  | 5  | 103495425 | 103541936 | + |
| 393 | 1452833_at   | Region | Rapgef2       | 76089  | 3  | 78790668  | 79018371  | - |
| 394 | 1417205_at   | Region | Kdelr2        | 66913  | 5  | 142462591 | 142480033 | + |
| 395 | 1435531_at   | Region | Usp3          | 235441 | 9  | 66641895  | 66716994  | - |
| 396 | 1416562_at   | Region | Gad1          | 14415  | 10 | 99423927  | 99427119  | + |
| 397 | 1451322_at   | Region | 2310016A09Rik | 69574  | 15 | 31569511  | 31590725  | + |
| 398 | 1419308_at   | Region | Invs          | 16348  | 4  | 48195745  | 48347875  | + |
| 399 | 1418094_s_at | Region | Car4          | 12351  | 11 | 84685835  | 84694036  | + |
| 400 | 1454916_s_at | Region | Arfip1        | 99889  | 3  | 84239544  | 84326073  | - |
| 401 | 1427964_at   | Region | Cklfsf8       | 70031  | 9  | 114763068 | 114817993 | - |
| 402 | 1423362_at   | Region | Sort1         | 20661  | 3  | 108079874 | 108157253 | + |
| 403 | 1426401_at   | Region | Ppp3ca        | 19055  | 3  | 135555655 | 135820664 | + |
| 404 | 1416576_at   | Region | Socs3         | 12702  | 11 | 117787172 | 117790255 | - |
| 405 | 1437502_x_at | Region | Cd24a         | 12484  | 10 | 43687333  | 43692412  | + |
| 406 | 1449254_at   | Region | Spp1          | 20750  | 5  | 103472077 | 103476914 | + |
| 407 | 1418493_a_at | Region | Snca          | 20617  | 6  | 60971674  | 61069793  | - |
| 408 | 1435018_at   | Region | 5930434B04Rik | 381356 | 2  | 26942112  | 26953251  | + |
| 409 | 1435780_at   | Region | Psd           | 73728  | 19 | 45859429  | 45874498  | - |
| 410 | 1435991_at   | Region | None          | None   | 8  | 76451919  | 76452991  | + |
| 411 | 1423266_at   | Region | 2810405K02Rik | 66469  | 4  | 153388792 | 153391405 | - |
| 412 | 1425022_at   | Region | Usp3          | 235441 | 9  | 66641895  | 66716994  | - |
| 413 | 1434082_at   | Region | None          | None   | 10 | 93207825  | 93213923  | + |
| 414 | 1417875_at   | Region | Ddx50         | 94213  | 10 | 62582408  | 62617583  | - |
| 415 | 1427232_at   | Region | Sdccag33      | 110796 | 18 | 84180139  | 84254394  | - |
| 416 | 1418049_at   | Region | Ltbp3         | 16998  | 19 | 5530917   | 5547315   | + |
| 417 | 1432466_a_at | Region | Apoe          | 11816  | 7  | 16565516  | 16568276  | - |
| 418 | 1454780_at   | Region | Galntl4       | 233733 | 7  | 105324798 | 105633114 | - |
| 419 | 1424534_at   | Region | Mmd2          | 75104  | 5  | 141570887 | 141587725 | - |
| 420 | 1437406_x_at | Region | Igfbp4        | 16010  | 11 | 98862347  | 98873733  | + |
| 421 | 1419459_a_at | Region | 2610529C04Rik | 67075  | X  | 100571582 | 100613141 | - |
| 422 | 1416470_a_at | Region | Rpn1          | 103963 | 6  | 88518156  | 88540499  | + |
| 423 | 1460666_a_at | Region | Ebf3          | 13593  | 7  | 131562834 | 131681580 | - |
| 424 | 1416529_at   | Region | Emp1          | 13730  | 6  | 136123687 | 136143929 | + |
| 425 | 1436611_at   | Region | Slc39a12      | 277468 | 2  | 14314676  | 14421249  | + |
| 426 | 1426083_a_at | Region | Btg1          | 12226  | 10 | 96594653  | 96597253  | + |
| 427 | 1455463_at   | Region | Phyhip        | 105653 | 14 | 64784073  | 64784814  | + |
| 428 | 1416259_at   | Region | Pex12         | 103737 | 11 | 83022634  | 83026966  | - |
| 429 | 1426562_a_at | Region | Olfm1         | 56177  | 2  | 28137838  | 28162624  | + |
| 430 | 1455512_at   | Region | None          | None   | 11 | 65937377  | 65937722  | - |
| 431 | 1448388_a_at | Region | 1110002B05Rik | 104725 | 12 | 51401417  | 51412527  | - |
| 432 | 1421312_a_at | Region | Kifc2         | 16581  | 15 | 76710387  | 76719267  | + |
| 433 | 1448697_s_at | Region | Rpl36al       | 66483  | 12 | 66014530  | 66015829  | - |
| 434 | 1423281_at   | Region | Stmn2         | 20257  | 3  | 8496587   | 8548309   | + |
| 435 | 1455469_at   | Region | Slc6a7        | 240332 | 18 | 61220706  | 61239525  | - |
| 436 | 1420924_at   | Region | Timp2         | 21858  | 11 | 118122157 | 118176401 | - |
| 437 | 1434028_at   | Region | Arnt2         | 11864  | 7  | 78100192  | 78263873  | - |
| 438 | 1423222_at   | Region | Cap2          | 67252  | 13 | 46100466  | 46248597  | + |
| 439 | 1434531_at   | Region | GnT-IX        | 268510 | 11 | 116740490 | 116806863 | + |
| 440 | 1435113_x_at | Region | Stmn3         | 20262  | 2  | 181023416 | 181031457 | - |
| 441 | 1457132_at   | Region | None          | None   | 19 | 9651868   | 9652362   | - |

|     |              |        |               |        |    |           |           |   |
|-----|--------------|--------|---------------|--------|----|-----------|-----------|---|
| 442 | 1454643_at   | Region | Ubp2l         | 74383  | 3  | 89810481  | 89862883  | - |
| 443 | 1415698_at   | Region | Golph2        | 105348 | 13 | 58294585  | 58335344  | - |
| 444 | 1433714_at   | Region | Sult4a1       | 29859  | 15 | 84124696  | 84154353  | - |
| 445 | 1438780_at   | Region | None          | None   | 7  | 121853710 | 121854459 | - |
| 446 | 1418922_at   | Region | Igsf4b        | 94332  | 1  | 173269605 | 173303046 | - |
| 447 | 1433667_at   | Region | Lgi3          | 213469 | 14 | 64846859  | 64854311  | + |
| 448 | 1416352_s_at | Region | Gpsn2         | 106529 | 8  | 82829225  | 82852112  | - |
| 449 | 1425023_at   | Region | Usp3          | 235441 | 9  | 66641895  | 66716994  | - |
| 450 | 1424241_at   | Region | Slc30a6       | 210148 | 17 | 72201922  | 72231341  | + |
| 451 | 1426858_at   | Region | Inhbb         | 16324  | 1  | 119166897 | 119190174 | - |
| 452 | 1422605_at   | Region | Ppp1r1a       | 58200  | 15 | 103593360 | 103601042 | - |
| 453 | 1436356_at   | Region | Samd4         | 74480  | 14 | 41964485  | 42183012  | + |
| 454 | 1416313_at   | Region | Mlit1         | 56772  | 3  | 94706375  | 94716012  | - |
| 455 | 1417978_at   | Region | Eif4e3        | 66892  | 6  | 100093332 | 100134966 | - |
| 456 | 1416189_a_at | Region | Sec61a1       | 53421  | 6  | 88938985  | 88954178  | - |
| 457 | 1421923_at   | Region | Sh3bp5        | 24056  | 14 | 29506822  | 29567836  | - |
| 458 | 1448752_at   | Region | Car2          | 12349  | 3  | 14902543  | 14916587  | + |
| 459 | 1421152_a_at | Region | Gnao1         | 14681  | 8  | 93095093  | 93253130  | + |
| 460 | 1435411_at   | Region | None          | None   | 11 | 98146502  | 98146979  | - |
| 461 | 1453328_at   | Region | 2700008G24Rik | 72545  | 14 | 58194965  | 58196768  | + |
| 462 | 1450339_a_at | Region | Bcl11b        | 58208  | 12 | 103386487 | 103474485 | - |
| 463 | 1418954_at   | Region | Camkk1        | 55984  | 11 | 72744711  | 72767731  | + |
| 464 | 1448598_at   | Region | Mmp17         | 23948  | 5  | 128760081 | 128784078 | + |
| 465 | 1415696_at   | Region | Sara1         | 20224  | 10 | 61646625  | 61659601  | + |
| 466 | 1417082_at   | Region | Anp32b        | 67628  | 4  | 46367037  | 46388445  | + |
| 467 | 1418586_at   | Region | Adcy9         | 11515  | 16 | 3958841   | 4090883   | - |
| 468 | 1438208_at   | Region | Taok2         | 381921 | 7  | 120915409 | 120932690 | - |
| 469 | 1455258_at   | Region | AW047325      | 268345 | 10 | 112134223 | 112135323 | + |
| 470 | 1435526_at   | Region | Tor1aip2      | 240832 | 1  | 155948197 | 155965475 | + |
| 471 | 1450378_at   | Region | Tapbp         | 21356  | 17 | 31623640  | 31631894  | + |
| 472 | 1455559_at   | Region | E330039K12Rik | 270109 | 8  | 125039040 | 125127379 | - |
| 473 | 1455500_at   | Region | D11Ertd759e   | 268513 | 11 | 119298143 | 119308517 | + |
| 474 | 1422711_a_at | Region | Pnck          | 93843  | X  | 68316649  | 68320483  | - |
| 475 | 1452783_at   | Region | Fndc3b        | 72007  | 3  | 26833958  | 27060578  | - |
| 476 | 1418210_at   | Region | Pfn2          | 18645  | 3  | 57483992  | 57489636  | - |
| 477 | 1435549_at   | Region | Trpm4         | 68667  | 7  | 39379174  | 39410284  | - |
| 478 | 1455168_a_at | Region | Gnb2l1        | 14694  | 11 | 48553197  | 48559078  | + |
| 479 | 1416209_at   | Region | Glud1         | 14661  | 14 | 32447805  | 32482226  | + |
| 480 | 1448856_a_at | Region | Msra          | 110265 | 14 | 58652085  | 58984181  | - |
| 481 | 1451201_s_at | Region | Rnh1          | 107702 | 7  | 135562313 | 135570695 | - |
| 482 | 1455324_at   | Region | LOC433022     | 433022 | 16 | 44845024  | 44847514  | - |
| 483 | 1423985_at   | Region | Gng5          | 14707  | 3  | 145476441 | 145482098 | + |
| 484 | 1435744_at   | Region | 6720401G13Rik | 103012 | X  | 45083921  | 45155862  | - |
| 485 | 1424996_at   | Region | Cflar         | 12633  | 1  | 59018187  | 59060035  | + |
| 486 | 1425719_a_at | Region | Nmi           | 64685  | 2  | 51880667  | 51905252  | - |
| 487 | 1426793_a_at | Region | Rpl14         | 67115  | 9  | 120583908 | 120587044 | + |
| 488 | 1418539_a_at | Region | Ptpre         | 19267  | 7  | 129905416 | 130053886 | + |
| 489 | 1417689_a_at | Region | Pdzk1p1       | 67182  | 4  | 114047628 | 114052798 | + |
| 490 | 1431037_a_at | Region | Elavl1        | 15568  | 8  | 3643294   | 3667872   | - |
| 491 | 1456149_at   | Region | D11Bwg0517e   | 52897  | 11 | 118311212 | 118312223 | - |
| 492 | 1449353_at   | Region | Wig1          | 22401  | 3  | 31742974  | 31773798  | - |
| 493 | 1434049_at   | Region | Entpd3        | 215446 | 9  | 120552235 | 120580709 | + |
| 494 | 1456954_at   | Region | Kcna6         | 16494  | 6  | 127379948 | 127411808 | - |
| 495 | 1422853_at   | Region | Shc1          | 20416  | 3  | 89175332  | 89186744  | + |
| 496 | 1434456_at   | Region | Gm440         | 242819 | 5  | 8496982   | 8629695   | - |
| 497 | 1430029_a_at | Region | Sas           | 67125  | 10 | 126800009 | 126802980 | - |
| 498 | 1456037_x_at | Region | Preb          | 50907  | 5  | 29413992  | 29419173  | - |
| 499 | 1448308_at   | Region | Ap3m1         | 55946  | 14 | 19399475  | 19416850  | - |
| 500 | 1416783_at   | Region | Tac1          | 21333  | 6  | 7527828   | 7535730   | + |
| 501 | 1444318_at   | Region | Chchd7        | 66433  | 4  | 3866060   | 3870669   | + |
| 502 | 1416268_at   | Region | Ets2          | 23872  | 16 | 95110358  | 95128440  | + |
| 503 | 1450713_at   | Region | Cspg5         | 29873  | 9  | 110285868 | 110302152 | + |
| 504 | 1426204_a_at | Region | Oprl1         | 18389  | 2  | 181432000 | 181437928 | + |
| 505 | 1451217_a_at | Region | 1500034J20Rik | 66541  | 2  | 105609439 | 105671940 | + |
| 506 | 1450042_at   | Region | Arx           | 11878  | X  | 87947304  | 87959015  | + |



|     |              |        |               |        |    |           |           |   |
|-----|--------------|--------|---------------|--------|----|-----------|-----------|---|
| 507 | 1433717_at   | Region | D19Wsu162e    | 226178 | 19 | 46146382  | 46202440  | + |
| 508 | 1419756_at   | Region | Dgkg          | 110197 | 16 | 21240316  | 21402362  | - |
| 509 | 1436624_at   | Region | Dnm3          | 103967 | 1  | 161896669 | 162387092 | - |
| 510 | 1445381_at   | Region | None          | None   | 15 | 102554226 | 102554874 | + |
| 511 | 1418778_at   | Region | 9030408N13Rik | 66815  | 3  | 128847850 | 128903077 | - |
| 512 | 1449151_at   | Region | Pctk3         | 18557  | 1  | 131965579 | 131993404 | - |
| 513 | 1434219_at   | Region | Stim2         | 116873 | 5  | 52808660  | 52930070  | + |
| 514 | 1418288_at   | Region | Lpin1         | 14245  | 12 | 15903061  | 15956128  | - |
| 515 | 1419127_at   | Region | Npy           | 109648 | 6  | 49963533  | 49970311  | + |
| 516 | 1453413_at   | Region | Gnas          | 14683  | 2  | 173709228 | 173771651 | + |
| 517 | 1427464_s_at | Region | Hspa5         | 14828  | 2  | 34704257  | 34708619  | + |
| 518 | 1417502_at   | Region | Tspan7        | 21912  | X  | 8763685   | 8835542   | + |
| 519 | 1435897_at   | Region | Rpl32         | 19951  | 6  | 116243049 | 116246278 | - |
| 520 | 1420668_a_at | Region | Yipf2         | 74766  | 9  | 21476083  | 21480147  | - |
| 521 | 1450089_a_at | Region | Srprb         | 20818  | 9  | 103163286 | 103177389 | - |
| 522 | 1429443_at   | Region | Cpne4         | 74020  | 9  | 104547441 | 105015435 | + |
| 523 | 1425036_a_at | Region | Tnrc6a        | 233833 | 7  | 117180427 | 117250357 | + |
| 524 | 1425518_at   | Region | Rapgef4       | 56508  | 2  | 71679030  | 71954119  | + |
| 525 | 1423865_at   | Region | Cdw92         | 100434 | 4  | 53356536  | 53538357  | + |
| 526 | 1429314_at   | Region | Syt11         | 229521 | 3  | 88489566  | 88516404  | - |
| 527 | 1433914_at   | Region | LOC381236     | 381236 | 19 | 32884802  | 32917750  | - |
| 528 | 1448507_at   | Region | Efhd1         | 98363  | 1  | 87080523  | 87126949  | + |
| 529 | 1454860_x_at | Region | Dad1          | 13135  | 14 | 48755589  | 48773800  | - |
| 530 | 1430904_at   | Region | Arfgap3       | 66251  | 15 | 83348357  | 83398846  | - |
| 531 | 1460654_at   | Region | Slc30a3       | 22784  | 5  | 29546887  | 29552436  | - |
| 532 | 1423286_at   | Region | Cbln1         | 12404  | 8  | 86752336  | 86755765  | - |
| 533 | 1447669_s_at | Region | Gng4          | 14706  | 13 | 13229694  | 13273161  | + |
| 534 | 1450958_at   | Region | Tm4sf1        | 17112  | 3  | 56919386  | 56927502  | - |
| 535 | 1419254_at   | Region | Mthfd2        | 17768  | 6  | 83649797  | 83661835  | - |
| 536 | 1455288_at   | Region | 1110036O03Rik | 66180  | 11 | 100229835 | 100235906 | - |
| 537 | 1423052_at   | Region | Arf4          | 11843  | 14 | 24734402  | 24753463  | + |
| 538 | 1434441_at   | Region | None          | None   | 13 | 61674664  | 61675740  | - |
| 539 | 1416903_at   | Region | Nucb1         | 18220  | 7  | 39574800  | 39592751  | - |
| 540 | 1452346_at   | Region | B3gnt6        | 108902 | 19 | 4827643   | 4829920   | + |
| 541 | 1443749_x_at | Region | Slc1a3        | 20512  | 15 | 8424368   | 8500974   | - |
| 542 | 1418746_at   | Region | MGI:1930773   | 56695  | 1  | 74587397  | 74662104  | + |
| 543 | 1416497_at   | Region | Pdia4         | 12304  | 6  | 47920672  | 47937538  | - |
| 544 | 1455304_at   | Region | Unc13c        | 208898 | 9  | 73612739  | 73778132  | - |
| 545 | 1455839_at   | Region | Ugcgl1        | 320011 | 1  | 36434885  | 36535646  | - |
| 546 | 1448023_at   | Region | Kalrn         | 224126 | 16 | 32783178  | 32784183  | - |
| 547 | 1436451_a_at | Region | 1110032D12Rik | 56334  | 5  | 123712134 | 123721846 | + |
| 548 | 1437079_at   | Region | Slc18a2       | 214084 | 19 | 58860486  | 58895236  | + |
| 549 | 1452985_at   | Region | Uaca          | 72565  | 9  | 60912092  | 60997458  | + |
| 550 | 1436732_s_at | Region | Fbxw8         | 231672 | 5  | 117193645 | 117284031 | - |
| 551 | 1425292_at   | Region | Dtna          | 13527  | 18 | 23643946  | 23881842  | + |
| 552 | 1423085_at   | Region | Efnb3         | 13643  | 11 | 69279783  | 69285836  | - |
| 553 | 1446174_at   | Region | LOC245440     | 245440 | X  | 55959993  | 55960712  | + |
| 554 | 1416213_x_at | Region | Surf4         | 20932  | 2  | 26852201  | 26866090  | - |
| 555 | 1433725_at   | Region | Acvr1b        | 11479  | 15 | 101231452 | 101269660 | + |
| 556 | 1449584_at   | Region | Dgkg          | 110197 | 16 | 21240316  | 21402362  | - |
| 557 | 1423427_at   | Region | Adcyap1       | 11516  | 17 | 91181801  | 91187870  | + |
| 558 | 1421425_a_at | Region | Dscr111       | 53901  | 17 | 41306763  | 41542936  | + |
| 559 | 1433452_at   | Region | B630019K06Rik | 102941 | X  | 7131322   | 7133903   | + |
| 560 | 1433916_at   | Region | Vamp3         | 22319  | 4  | 149539667 | 149550315 | - |
| 561 | 1422064_a_at | Region | Zbtb20        | 56490  | 16 | 42442156  | 42491541  | + |
| 562 | 1417318_at   | Region | Dbccr1        | 56710  | 4  | 67853202  | 67996147  | - |
| 563 | 1435513_at   | Region | Htr2c         | 15560  | X  | 140402560 | 140637323 | + |
| 564 | 1436054_at   | Region | 9130227C08Rik | 219094 | 14 | 50402985  | 50414797  | + |
| 565 | 1460349_at   | Region | BC006909      | 233895 | 7  | 121521345 | 121526489 | + |
| 566 | 1418046_at   | Region | Nap1l2        | 17954  | X  | 97785541  | 97788005  | - |
| 567 | 1422073_a_at | Region | Celsr2        | 53883  | 3  | 108188186 | 108211236 | - |
| 568 | 1417764_at   | Region | Ssr1          | 107513 | 13 | 37516882  | 37533029  | - |
| 569 | 1442370_at   | Region | None          | None   | 6  | 136474502 | 136475357 | - |
| 570 | 1416114_at   | Region | Sparcl1       | 13602  | 5  | 103113902 | 103148495 | - |
| 571 | 1415979_x_at | Region | Rpl7          | 19989  | 1  | 16284751  | 16287861  | - |

|                   |              |        |               |        |    |           |           |   |
|-------------------|--------------|--------|---------------|--------|----|-----------|-----------|---|
| 572               | 1455021_at   | Region | Gabbr1        | 54393  | 17 | 34805575  | 34833793  | + |
| 573               | 1428385_at   | Region | 38419         | 71779  | 6  | 116775658 | 116847075 | + |
| 574               | 1419273_at   | Region | C80913        | 19777  | 7  | 33124913  | 33183548  | - |
| 575               | 1452913_at   | Region | Pcp4l1        | 66425  | 1  | 171102105 | 171125874 | - |
| 576               | 1458697_at   | Region | None          | None   | 5  | 47938645  | 47939393  | - |
| 577               | 1449240_at   | Region | MGI:1333876   | 19051  | 6  | 56161840  | 56177013  | + |
| 578               | 1450757_at   | Region | Cdh11         | 12552  | 8  | 101922774 | 102074855 | - |
| 579               | 1419122_at   | Region | Mettl1        | 17299  | 10 | 126774651 | 126778180 | + |
| 2900092E17Rik /// |              |        |               |        |    |           |           |   |
| 580               | 1429113_at   | Region | 1500031119Rik | 67278  | 7  | 121064782 | 121067083 | - |
| 581               | 1429191_at   | Region | Dhx33         | 216877 | 11 | 70709749  | 70730090  | - |
| 582               | 1454688_x_at | Region | 1110014C03Rik | 68581  | 12 | 82210494  | 82242351  | - |
| 583               | 1421175_at   | Region | Myt1l         | 17933  | 12 | 26094752  | 26491102  | + |
| 584               | 1420764_at   | Region | Scrg1         | 20284  | 8  | 56495341  | 56516819  | + |
| 585               | 1435222_at   | Region | Foxp1         | 108655 | 6  | 99395348  | 99630926  | - |
| 586               | 1417763_at   | Region | Ssr1          | 107513 | 13 | 37516882  | 37533029  | - |
| 587               | 1416611_at   | Region | Scamp2        | 24044  | 9  | 57674914  | 57702719  | + |
| 588               | 1418624_at   | Region | Nsep1         | 22608  | 4  | 118237139 | 118253295 | - |
| 589               | 1428329_a_at | Region | Wdr56         | 68259  | 3  | 68563024  | 68674987  | - |
| 590               | 1435435_at   | Region | Cttnbp2       | 30785  | 6  | 18415877  | 18564265  | - |
| 591               | 1417416_at   | Region | Kcna1         | 16485  | 6  | 127312007 | 127316405 | - |
| 592               | 1448129_at   | Region | Arpc5         | 67771  | 1  | 152651135 | 152660059 | + |
| 593               | 1416949_s_at | Region | Slc39a7       | 14977  | 17 | 31732423  | 31735708  | - |
| 594               | 1434447_at   | Region | None          | None   | 6  | 17555511  | 17557425  | + |
| 595               | 1440838_at   | Region | Al852064      | 99104  | 2  | 166552704 | 166553624 | - |
| 596               | 1439500_at   | Region | None          | None   | 6  | 54650215  | 54651231  | - |
| 597               | 1448729_a_at | Region | 38599         | 18952  | 11 | 87309123  | 87318531  | + |
| 598               | 1417819_at   | Region | Tor1b         | 30934  | 2  | 30885164  | 30890432  | + |
| 599               | 1453104_at   | Region | Mapk1         | 26413  | 16 | 15754059  | 15816626  | + |
| 600               | 1448397_at   | Region | Gjb6          | 14623  | 14 | 51654587  | 51664861  | - |
| 601               | 1433627_at   | Region | Sec23ip       | 207352 | 7  | 122836737 | 122858402 | + |
| 602               | 1450734_at   | Region | Lztr2         | 89867  | 1  | 157412378 | 157473993 | + |
| 603               | 1427468_at   | Region | Ppp3cb        | 19056  | 14 | 18861352  | 18907856  | - |
| 604               | 1449272_at   | Region | Igsf4b        | 94332  | 1  | 173269605 | 173303046 | - |
| 605               | 1435207_at   | Region | Dixdc1        | 330938 | 9  | 50735078  | 50800301  | - |
| 606               | 1422158_at   | Region | Clstn2        | 64085  | 9  | 97343753  | 97483061  | - |
| 607               | 1433751_at   | Region | Slc39a10      | 227059 | 1  | 47099555  | 47145520  | - |
| 608               | 1448272_at   | Region | Btg2          | 12227  | 1  | 133925590 | 133929382 | - |
| 609               | 1450080_at   | Region | Cxx1c         | 72865  | X  | 48192667  | 48193756  | + |
| 610               | 1437414_at   | Region | Zfp217        | 228913 | 2  | 169617376 | 169619047 | - |
| 611               | 1427413_a_at | Region | Cugbp1        | 13046  | 2  | 90645207  | 90721804  | + |
| 612               | 1417414_at   | Region | 38598         | 24050  | 15 | 82325610  | 82342778  | + |
| 613               | 1426225_at   | Region | Rbp4          | 19662  | 19 | 37460433  | 37468611  | - |
| 614               | 1426666_a_at | Region | Unc84a        | 77053  | 5  | 138213212 | 138247853 | + |
| 615               | 1434156_at   | Region | Rab11fip4     | 268451 | 11 | 79316871  | 79419671  | + |
| 616               | 1419225_at   | Region | Cacna2d3      | 12294  | 14 | 27041818  | 27858330  | - |
| 617               | 1433477_at   | Region | Abr           | 109934 | 11 | 76142392  | 76303385  | - |
| 618               | 1455792_x_at | Region | Ndn           | 17984  | 7  | 56122085  | 56123665  | + |
| 619               | 1453155_at   | Region | Tmem50a       | 71817  | 4  | 133858923 | 133875889 | - |
| 620               | 1426010_a_at | Region | Epb4.1l3      | 13823  | 17 | 66934864  | 67065569  | + |
| 621               | 1435566_s_at | Region | Araf          | 11836  | X  | 19087538  | 19099458  | + |
| 622               | 1417297_at   | Region | Itpr3         | 16440  | 17 | 24906500  | 24918141  | + |
| 623               | 1450627_at   | Region | Ank           | 11732  | 15 | 27456007  | 27584356  | + |
| 624               | 1435890_at   | Region | 5730596K20Rik | 109168 | 19 | 7208422   | 7249028   | + |
| 625               | 1422943_a_at | Region | Hspb1         | 15507  | 5  | 134901551 | 134902929 | + |
| 626               | 1453197_at   | Region | Med25         | 75613  | 7  | 38954595  | 38967682  | - |
| 627               | 1435336_at   | Region | Celsr2        | 53883  | 3  | 108188186 | 108211236 | - |
| 628               | 1434290_at   | Region | Gtdc1         | 227835 | 2  | 44496584  | 44793784  | - |
| 629               | 1448103_s_at | Region | Nono          | 53610  | X  | 96031077  | 96049950  | + |
| 630               | 1417343_at   | Region | Fxyd6         | 59095  | 9  | 45383154  | 45408890  | + |
| 631               | 1453287_at   | Region | 5730557B15Rik | 67434  | 15 | 31296331  | 31368171  | - |
| 632               | 1436919_at   | Region | Trp53i11      | 277414 | 2  | 92905058  | 92906441  | + |
| 633               | 1416663_at   | Region | Ndufa9        | 66108  | 6  | 127495996 | 127523163 | - |
| 634               | 1455012_s_at | Region | Trim37        | 68729  | 11 | 86855069  | 86948674  | + |
| 635               | 1430583_at   | Region | C130076O07Rik | 319504 | 12 | 40985533  | 41346376  | + |

|     |              |        |                 |        |    |           |           |   |
|-----|--------------|--------|-----------------|--------|----|-----------|-----------|---|
| 636 | 1421063_s_at | Region | Snrpn /// Snurf | 20646  | 7  | 53759592  | 53781697  | - |
| 637 | 1434640_at   | Region | Gm123           | 228777 | 2  | 151825694 | 151833502 | - |
| 638 | 1450649_at   | Region | Gng10           | 14700  | 4  | 58978680  | 58985344  | + |
| 639 | 1460361_at   | Region | 5033414D02Rik   | 67759  | 19 | 28601276  | 28614470  | - |
| 640 | 1415823_at   | Region | Scd2            | 20250  | 19 | 43838494  | 43851266  | + |
| 641 | 1433556_at   | Region | Centa1          | 231821 | 5  | 138269934 | 138303831 | - |
| 642 | 1415964_at   | Region | Scd1            | 20249  | 19 | 43938861  | 43951959  | - |
| 643 | 1450143_at   | Region | Rasgrp1         | 19419  | 2  | 116793841 | 116856725 | - |
| 644 | 1434758_at   | Region | 1810049K24Rik   | 78892  | 8  | 119359392 | 119408065 | + |
| 645 | 1435220_s_at | Region | Cdc42se2        | 72729  | 11 | 54470343  | 54540477  | - |
| 646 | 1436566_at   | Region | Rab40b          | 217371 | 11 | 121177896 | 121209232 | - |
| 647 | 1435605_at   | Region | Actr3b          | 242894 | 5  | 24230231  | 24320547  | + |
| 648 | 1427673_a_at | Region | Sema3e          | 20349  | 5  | 13478445  | 13707444  | + |
| 649 | 1451526_at   | Region | Arhgap12        | 75415  | 18 | 6067924   | 6178605   | - |
| 650 | 1460576_at   | Region | Sec1511         | 107371 | 19 | 36893738  | 37026525  | + |
| 651 | 1434270_at   | Region | Nptxr           | 73340  | 15 | 79841252  | 79857012  | - |
| 652 | 1419186_a_at | Region | St8sia4         | 20452  | 1  | 95359334  | 95439253  | - |
| 653 | 1423519_at   | Region | 2210412D01Rik   | 70178  | 7  | 77963273  | 78005807  | - |
| 654 | 1425546_a_at | Region | Trf             | 22041  | 9  | 103184317 | 103205727 | - |
| 655 | 1439086_at   | Region | A930009L07Rik   | 402733 | 15 | 72534597  | 72536256  | - |
| 656 | 1440856_at   | Region | Mapk8           | 26419  | 14 | 31516453  | 31580724  | - |
| 657 | 1451825_a_at | Region | Copz1           | 56447  | 15 | 103352029 | 103362737 | + |
| 658 | 1429008_at   | Region | 1810074P20Rik   | 67490  | 4  | 25385663  | 25417278  | - |
| 659 | 1426282_at   | Region | MGI:2446259     | 235106 | 9  | 28892331  | 29088826  | - |
| 660 | 1449030_at   | Region | Syn2            | 20965  | 6  | 115570293 | 115710479 | + |
| 661 | 1448288_at   | Region | Nfib            | 18028  | 4  | 81281923  | 81491315  | - |
| 662 | 1416561_at   | Region | Gad1            | 14415  | 10 | 99423927  | 99427119  | + |
| 663 | 1422520_at   | Region | Nef3            | 18040  | 14 | 62648482  | 62653258  | - |
| 664 | 1424757_at   | Region | BC018242        | 235044 | 9  | 21828276  | 21838888  | + |
| 665 | 1423627_at   | Region | Nqo1            | 18104  | 8  | 106685918 | 106700959 | - |
| 666 | 1427465_at   | Region | Atp1a2          | 98660  | 1  | 172203449 | 172226896 | - |
| 667 | 1436334_at   | Region | Synj1           | 104015 | 16 | 90104242  | 90168538  | - |
| 668 | 1436889_at   | Region | Gabra1          | 14394  | 11 | 41884317  | 41935767  | - |
| 669 | 1433592_at   | Region | Calm1           | 12313  | 12 | 95642228  | 95652493  | + |
| 670 | 1449037_at   | Region | Crem            | 12916  | 18 | 3271060   | 3332223   | - |
| 671 | 1438676_at   | Region | Mpa2l           | 100702 | 5  | 0         | 5299      | - |
| 672 | 1434092_at   | Region | Nos3as          | 213948 | 5  | 22848078  | 22856040  | - |
| 673 | 1429071_at   | Region | Me3             | 109264 | 7  | 83611590  | 83844667  | + |
| 674 | 1451454_at   | Region | Pcdh20          | 219257 | 14 | 19456     | 24795     | + |
| 675 | 1460288_a_at | Region | Ppp4c           | 56420  | 7  | 120835599 | 120842202 | - |
| 676 | 1434055_at   | Region | Galnt9          | 231605 | 5  | 109666450 | 109672349 | + |
| 677 | 1455460_at   | Region | 6430547I21Rik   | 320521 | 3  | 17128462  | 17130564  | + |
| 678 | 1434946_at   | Region | None            | None   | 12 | 3260343   | 3261335   | + |
| 679 | 1455604_at   | Region | LOC545325       | 545325 | 1  | 65024018  | 65027347  | - |
| 680 | 1452779_at   | Region | 3110006E14Rik   | 76980  | 13 | 65736190  | 65772458  | - |
| 681 | 1418926_at   | Region | Zfhx1a          | 21417  | 18 | 5709786   | 5817483   | + |
| 682 | 1430038_at   | Region | Gphn            | 268566 | 12 | 75199951  | 75541337  | + |
| 683 | 1422072_a_at | Region | Gstm6           | 14867  | 3  | 107734969 | 107739375 | - |
| 684 | 1421950_at   | Region | Pfdn2           | 18637  | 1  | 171274538 | 171287009 | + |
| 685 | 1433737_at   | Region | Uhmk1           | 16589  | 1  | 170133433 | 170149570 | - |
| 686 | 1434785_at   | Region | Cacng5          | 140723 | 11 | 107695694 | 107732451 | - |
| 687 | 1417883_at   | Region | Gstt2           | 14872  | 10 | 75933625  | 75936026  | - |
| 688 | 1417504_at   | Region | Calb1           | 12307  | 4  | 15808229  | 15833613  | + |
| 689 | 1452308_a_at | Region | Atp1a2          | 98660  | 1  | 172203449 | 172226896 | - |
| 690 | 1416138_at   | Region | Anxa7           | 11750  | 14 | 18816589  | 18841128  | - |
| 691 | 1424767_at   | Region | Cdh22           | 104010 | 2  | 164568242 | 164691452 | - |
| 692 | 1452169_a_at | Region | Dgkz            | 104418 | 2  | 91637575  | 91668348  | - |
| 693 | 1451175_at   | Region | Spcs3           | 76687  | 8  | 53487715  | 53497276  | - |
| 694 | 1448541_at   | Region | Kns2            | 16593  | 12 | 107239749 | 107276237 | + |
| 695 | 1443823_s_at | Region | None            | None   | 1  | 172201421 | 172201688 | - |
| 696 | 1458842_at   | Region | None            | None   | X  | 37048684  | 37049466  | - |
| 697 | 1450241_a_at | Region | Evi2a           | 14017  | 11 | 79252219  | 79256225  | - |
| 698 | 1450250_at   | Region | AJ430384        | 170711 | 7  | 57389063  | 57532804  | + |
| 699 | 1429790_at   | Region | Brunol6         | 76183  | 9  | 59695096  | 59724051  | + |
| 700 | 1455766_at   | Region | Gabra1          | 14394  | 11 | 41884317  | 41935767  | - |

|     |              |        |               |        |    |           |           |   |
|-----|--------------|--------|---------------|--------|----|-----------|-----------|---|
| 701 | 1444384_at   | Region | None          | None   | 6  | 53188844  | 53189622  | - |
| 702 | 1455987_at   | Region | Sec61a1       | 53421  | 6  | 88938985  | 88954178  | - |
| 703 | 1418392_a_at | Region | Gbp4          | 55932  | 3  | 141529119 | 141542183 | + |
| 704 | 1417059_at   | Region | Krtcap2       | 66059  | 3  | 89002910  | 89006194  | + |
| 705 | 1434058_at   | Region | Pip3ap        | 268783 | 15 | 12016928  | 12083863  | + |
| 706 | 1423221_at   | Region | Tubb4         | 22153  | 17 | 54770117  | 54777481  | - |
| 707 | 1435488_at   | Region | C630010D07Rik | 503860 | 5  | 90246954  | 90249118  | + |
| 708 | 1419252_at   | Region | None          | None   | 4  | 108239180 | 108346720 | + |
| 709 | 1425296_a_at | Region | Rgs3          | 50780  | 4  | 61651038  | 61793526  | + |
| 710 | 1419406_a_at | Region | Bcl11a        | 14025  | 11 | 23972907  | 24067984  | + |
| 711 | 1429556_at   | Region | 2610024B07Rik | 269987 | 7  | 106757788 | 106760502 | + |
| 712 | 1451683_x_at | Region | H2-D1         | 14964  | 17 | 186801    | 249200    | - |
| 713 | 1419237_at   | Region | Usp29         | 57775  | 7  | 5934028   | 6173502   | + |
| 714 | 1439278_at   | Region | Zbtb20        | 56490  | 16 | 42442156  | 42491541  | + |
| 715 | 1436143_at   | Region | 4933425L03Rik | 71169  | 12 | 12682551  | 12943170  | + |
| 716 | 1416985_at   | Region | None          | None   | 2  | 129107058 | 129146082 | + |
| 717 | 1423974_at   | Region | Numa1         | 101706 | 7  | 96075802  | 96120917  | + |
| 718 | 1437400_at   | Region | Nedd4l        | 83814  | 18 | 65256461  | 65446324  | + |
| 719 | 1435841_s_at | Region | Suc1g2        | 20917  | 6  | 95936120  | 96180762  | - |
| 720 | 1428937_at   | Region | Atp2b1        | 67972  | 10 | 98895589  | 99006572  | + |
| 721 | 1457325_at   | Region | Kcns2         | 16539  | 15 | 34837430  | 34842137  | + |
| 722 | 1419403_at   | Region | BC017612      | 170748 | 9  | 15342359  | 15382526  | + |
| 723 | 1425963_at   | Region | Cabp7         | 192650 | 11 | 4633608   | 4641565   | - |
| 724 | 1429063_s_at | Region | Kif16b        | 16558  | 2  | 142170469 | 142397720 | - |
| 725 | 1448489_at   | Region | Pafah2        | 100163 | 4  | 133358372 | 133388311 | + |
| 726 | 1423745_at   | Region | 1110031B06Rik | 67826  | 11 | 59132779  | 59175585  | - |
| 727 | 1445359_at   | Region | Adcy1         | 432530 | 11 | 7068440   | 7069089   | + |
| 728 | 1455109_at   | Region | Tbl1xr1       | 81004  | 3  | 21419728  | 21554694  | + |
| 729 | 1438507_x_at | Region | Rpl14         | 67115  | 9  | 120583908 | 120587044 | + |
| 730 | 1417529_at   | Region | Rab33a        | 19337  | X  | 43040266  | 43051028  | + |
| 731 | 1452284_at   | Region | Ptprz1        | 19283  | 6  | 22927206  | 23056382  | + |
| 732 | 1449280_at   | Region | Esm1          | 71690  | 13 | 109607521 | 109615966 | + |
| 733 | 1434489_at   | Region | Elmo3         | 234683 | 8  | 104601237 | 104606388 | + |
| 734 | 1441952_x_at | Region | Lynx1         | 23936  | 15 | 74779518  | 74784641  | - |
| 735 | 1420563_at   | Region | Gria3         | 53623  | X  | 35922307  | 36197357  | + |
| 736 | 1438626_x_at | Region | Rpl14         | 67115  | 9  | 120583908 | 120587044 | + |
| 737 | 1429085_at   | Region | Vezf1         | 22344  | 11 | 87796271  | 87812715  | + |
| 738 | 1452792_at   | Region | Dzip1         | 66573  | 14 | 113431542 | 113479731 | - |
| 739 | 1448668_a_at | Region | Irak1         | 16179  | X  | 68675627  | 68684576  | - |
| 740 | 1437076_at   | Region | A930017M01Rik | 239410 | 15 | 44697904  | 44830364  | + |
| 741 | 1455267_at   | Region | Esrrg         | 26381  | 1  | 187506691 | 187723715 | + |
| 742 | 1438532_at   | Region | None          | None   | 1  | 150399271 | 150400014 | - |
| 743 | 1451505_at   | Region | Chchd5        | 66170  | 2  | 128643675 | 128647960 | + |
| 744 | 1416385_a_at | Region | M6pr          | 17113  | 6  | 122969976 | 122978644 | + |
| 745 | 1450833_at   | Region | Chrm1         | 12669  | 19 | 7860376   | 7878114   | + |
| 746 | 1417956_at   | Region | Cidea         | 12683  | 18 | 67573460  | 67597721  | + |
| 747 | 1452514_a_at | Region | Kit           | 16590  | 5  | 74409260  | 74490904  | + |
| 748 | 1454960_at   | Region | Smad3         | 17127  | 9  | 63767269  | 63878762  | - |
| 749 | 1423282_at   | Region | Pitpna        | 18738  | 11 | 75313766  | 75354436  | + |
| 750 | 1418578_at   | Region | Dgka          | 13139  | 10 | 128457224 | 128481146 | - |
| 751 | 1422661_at   | Region | Lgals8        | 56048  | 13 | 12479155  | 12500727  | - |
| 752 | 1423939_a_at | Region | Yif1          | 68090  | 19 | 4877343   | 4881646   | + |
| 753 | 1428910_at   | Region | 2310022B05Rik | 69551  | 8  | 123922828 | 123950441 | - |
| 754 | 1438198_at   | Region | Bri3bp        | 76809  | 5  | 124608455 | 124621964 | + |
| 755 | 1416125_at   | Region | Fkbp5         | 14229  | 17 | 26200322  | 26287578  | - |
| 756 | 1421735_a_at | Region | St8sia5       | 225742 | 18 | 77307467  | 77377231  | + |
| 757 | 1443855_at   | Region | None          | None   | 7  | 40523176  | 40524053  | + |
| 758 | 1438710_at   | Region | Htr1a         | 15550  | 13 | 101659844 | 101664197 | + |
| 759 | 1459921_at   | Region | Nxph1         | 18231  | 6  | 8916972   | 9216425   | + |
| 760 | 1417434_at   | Region | Gpd2          | 14571  | 2  | 57163836  | 57293151  | + |
| 761 | 1430527_a_at | Region | Rnf167        | 70510  | 11 | 70373247  | 70377079  | + |
| 762 | 1434177_at   | Region | Ece1          | 230857 | 4  | 136743558 | 136846490 | + |
| 763 | 1440840_at   | Region | D630004K10Rik | 103210 | 10 | 124912854 | 124914030 | - |
| 764 | 1438415_s_at | Region | Yipf2         | 74766  | 9  | 21476083  | 21480147  | - |
| 765 | 1460378_a_at | Region | Tes           | 21753  | 6  | 17048640  | 17089269  | + |

|     |              |        |                |        |    |           |           |   |
|-----|--------------|--------|----------------|--------|----|-----------|-----------|---|
| 766 | 1456483_at   | Region | Zfp9           | 22750  | 6  | 118894561 | 118911845 | - |
| 767 | 1429764_at   | Region | 1500005K14Rik  | 76566  | 11 | 75746247  | 75753441  | - |
| 768 | 1422695_at   | Region | Ttyh1 /// Taf1 | 270627 | X  | 96134183  | 96201680  | + |
| 769 | 1451332_at   | Region | Zfp521         | 225207 | 18 | 13876625  | 14161173  | - |
| 770 | 1416997_a_at | Region | Hap1           | 15114  | 11 | 100168414 | 100177174 | - |
| 771 | 1458007_at   | Region | Myo1b          | 17912  | 1  | 52050933  | 52208258  | - |
| 772 | 1455364_a_at | Region | Rps7           | 20115  | 12 | 25196338  | 25201165  | - |
| 773 | 1420649_at   | Region | Atbf1          | 11906  | 8  | 108012331 | 108254925 | + |
| 774 | 1434169_at   | Region | 9030409G11Rik  | 71529  | 4  | 140983652 | 141035828 | - |
| 775 | 1452935_at   | Region | LOC546143      | 546143 | 9  | 73112484  | 73118119  | - |
| 776 | 1417222_a_at | Region | 2310075C12Rik  | 71929  | 9  | 49        | 3543      | + |
| 777 | 1452892_at   | Region | Stk33          | 117229 | 7  | 103132170 | 103291947 | - |
| 778 | 1438233_at   | Region | 6030443O07Rik  | 226151 | 19 | 44475557  | 44527665  | + |
| 779 | 1455516_at   | Region | None           | None   | 2  | 65886247  | 65886947  | + |
| 780 | 1434582_at   | Region | D14ErtD171e    | 238988 | 14 | 25761526  | 26615037  | + |
| 781 | 1417703_at   | Region | Pvrl2          | 19294  | 7  | 16585905  | 16618713  | - |
| 782 | 1426346_at   | Region | Prepl          | 213760 | 17 | 82893334  | 82920056  | - |
| 783 | 1437234_x_at | Region | Hrmt111        | 15468  | 10 | 76308969  | 76339515  | - |
| 784 | 1436100_at   | Region | BC036961       | 230863 | 4  | 137131739 | 137142223 | + |
| 785 | 1424015_at   | Region | Rab6ip1        | 19347  | 7  | 103746651 | 103813293 | + |
| 786 | 1430600_at   | Region | Cklfsf5        | 67272  | 14 | 49452973  | 49454996  | + |
| 787 | 1424400_a_at | Region | Fthfd          | 107747 | 6  | 90990080  | 91038403  | + |
| 788 | 1416605_at   | Region | Nola2          | 52530  | 11 | 51372614  | 51376555  | + |
| 789 | 1436483_at   | Region | Myt11          | 17933  | 12 | 26094752  | 26491102  | + |
| 790 | 1421922_at   | Region | Sh3bp5         | 24056  | 14 | 29506822  | 29567836  | - |
| 791 | 1430780_a_at | Region | Pmm1           | 29858  | 15 | 82001829  | 82011581  | - |
| 792 | 1422501_s_at | Region | Idh3a          | 67834  | 9  | 54704020  | 54722171  | + |
| 793 | 1455440_at   | Region | AI850629       | 100227 | 4  | 146496622 | 146498323 | - |
| 794 | 1437226_x_at | Region | Mlp            | 17357  | 4  | 128540757 | 128543088 | + |
| 795 | 1437700_at   | Region | Schip1         | 30953  | 3  | 68244719  | 68298773  | + |
| 796 | 1454687_at   | Region | Lrnf5          | 238205 | 12 | 58254745  | 58585291  | + |
| 797 | 1448623_at   | Region | 2310075C12Rik  | 71929  | 9  | 49        | 3543      | + |
| 798 | 1425303_at   | Region | Gck            | 103988 | 11 | 5795610   | 5844386   | - |
| 799 | 1448628_at   | Region | Scg3           | 20255  | 9  | 75780953  | 75821921  | - |
| 800 | 1416212_at   | Region | Magoh          | 17149  | 4  | 106838721 | 106846303 | + |
| 801 | 1434982_at   | Region | None           | None   | 13 | 43232521  | 43233386  | + |
| 802 | 1426708_at   | Region | Antxr2         | 71914  | 5  | 96902784  | 97050591  | - |
| 803 | 1418712_at   | Region | Cdc42ep5       | 58804  | 7  | 3372578   | 3387115   | - |
| 804 | 1452059_at   | Region | Slc35f5        | 74150  | 1  | 125395950 | 125430729 | + |
| 805 | 1416469_at   | Region | Luzp1          | 269593 | 4  | 135402649 | 135430572 | + |
| 806 | 1436381_at   | Region | Dlgap3         | 242667 | 4  | 126196384 | 126264135 | + |
| 807 | 1423058_at   | Region | Capza2         | 12343  | 6  | 17620542  | 17649978  | + |
| 808 | 1434051_s_at | Region | None           | None   | 19 | 58395304  | 58396677  | - |
| 809 | 1422824_s_at | Region | Eps8           | 13860  | 6  | 138270172 | 138331399 | - |
| 810 | 1420981_a_at | Region | Lmo4           | 16911  | 3  | 143160075 | 143176516 | - |
| 811 | 1417996_at   | Region | Ngb            | 64242  | 12 | 83977157  | 83982165  | - |
| 812 | 1426510_at   | Region | Sccpdh         | 109232 | 1  | 179622477 | 179641430 | + |
| 813 | 1425964_x_at | Region | Hspb1          | 15507  | 5  | 134901551 | 134902929 | + |
| 814 | 1443485_at   | Region | Epha7          | 13841  | 4  | 28997442  | 29149372  | + |
| 815 | 1419489_at   | Region | AW049604       | 106014 | 15 | 87677520  | 87811654  | + |
| 816 | 1452182_at   | Region | Galnt2         | 108148 | 8  | 123518466 | 123632794 | + |
| 817 | 1428544_at   | Region | 0610007L01Rik  | 71667  | 5  | 129392160 | 129415495 | + |
| 818 | 1435722_at   | Region | Gria4          | 14802  | 9  | 4328268   | 4706535   | - |
| 819 | 1454953_at   | Region | Rnf157         | 217340 | 11 | 116157470 | 116234559 | - |
| 820 | 1434203_at   | Region | BC055107       | 268709 | 14 | 5963634   | 5976774   | - |
| 821 | 1452336_at   | Region | BC027382       | 407796 | 14 | 59885676  | 59926070  | + |
| 822 | 1439854_at   | Region | AI838259       | 100738 | 5  | 117317204 | 117318125 | + |
| 823 | 1425181_at   | Region | Sgjp1          | 73094  | 4  | 101719268 | 101930082 | + |
| 824 | 1435215_at   | Region | Ap1gbp1        | 217030 | 11 | 83692463  | 83770081  | + |
| 825 | 1448147_at   | Region | Tnfrsf19       | 29820  | 14 | 55499179  | 55581612  | - |
| 826 | 1428852_at   | Region | Dock3          | 208869 | 9  | 106961161 | 107297640 | - |
| 827 | 1448503_at   | Region | Mcl1           | 17210  | 3  | 95146619  | 95151011  | + |
| 828 | 1456833_at   | Region | Gpr17          | 574402 | 18 | 32183140  | 32183816  | - |
| 829 | 1428523_at   | Region | Lphn3          | 319387 | 5  | 80275281  | 81049432  | + |
| 830 | 1437342_x_at | Region | Pttg1ip        | 108705 | 10 | 77693207  | 77710168  | + |

|     |              |        |               |        |    |           |           |   |
|-----|--------------|--------|---------------|--------|----|-----------|-----------|---|
| 831 | 1422475_a_at | Region | Rps3a         | 20091  | 3  | 85882334  | 85886981  | - |
| 832 | 1428853_at   | Region | Ptch1         | 19206  | 13 | 60894523  | 60948510  | - |
| 833 | 1435999_at   | Region | C630041L24Rik | 78709  | 9  | 109837816 | 109847794 | + |
| 834 | 1448649_at   | Region | Enpep         | 13809  | 3  | 128200173 | 128262962 | - |
| 835 | 1454623_at   | Region | MGC107514     | 232680 | 6  | 30588546  | 30611397  | + |
| 836 | 1442011_at   | Region | A230065H16Rik | 380787 | 12 | 106880200 | 106885468 | + |
| 837 | 1445639_at   | Region | None          | None   | 10 | 10208589  | 10212761  | - |
| 838 | 1428926_at   | Region | 1110003O08Rik | 76291  | 8  | 120931218 | 120933363 | - |
| 839 | 1417530_a_at | Region | Srp9          | 27058  | 1  | 182083607 | 182091245 | + |
| 840 | 1415943_at   | Region | Sdc1          | 20969  | 12 | 8087711   | 8110003   | + |
| 841 | 1438272_at   | Region | None          | None   | 15 | 47576240  | 47577169  | - |
| 842 | 1437559_at   | Region | D13Bwg1146e   | 52882  | 13 | 101166216 | 101269810 | - |
| 843 | 1452020_a_at | Region | MGI:1353606   | 30954  | 12 | 108124289 | 108128532 | + |
| 844 | 1417590_at   | Region | Cyp27a1       | 104086 | 1  | 75015769  | 75040224  | + |
| 845 | 1428114_at   | Region | Slc14a1       | 108052 | 18 | 78222739  | 78245970  | - |
| 846 | 1416700_at   | Region | Rnd3          | 74194  | 2  | 51062601  | 51081273  | - |
| 847 | 1419717_at   | Region | Sema3e        | 20349  | 5  | 13478445  | 13707444  | + |
| 848 | 1421281_at   | Region | Gabra1        | 14394  | 11 | 41884317  | 41935767  | - |
| 849 | 1448299_at   | Region | Slc1a1        | 20510  | 19 | 28087763  | 28166557  | + |
| 850 | 1456480_at   | Region | 9330186A19Rik | 320365 | 5  | 149134722 | 149437633 | + |
| 851 | 1449380_at   | Region | Pacsin1       | 23969  | 17 | 25451600  | 25507024  | + |
| 852 | 1434651_a_at | Region | Cldn3         | 12739  | 5  | 133999706 | 134000964 | + |
| 853 | 1448892_at   | Region | Dock7         | 67299  | 4  | 97911748  | 97959905  | - |
| 854 | 1433888_at   | Region | Atp2b2        | 11941  | 6  | 114316878 | 114489190 | - |
| 855 | 1428836_at   | Region | 2300009A05Rik | 69478  | 9  | 63517826  | 63519651  | - |
| 856 | 1455130_at   | Region | 5830435K17Rik | 101685 | 7  | 41076681  | 41094192  | - |
| 857 | 1457054_a_at | Region | D130020L05Rik | 319760 | 12 | 96529227  | 96533638  | + |
| 858 | 1429922_at   | Region | None          | None   | 2  | 66296280  | 66339959  | + |
| 859 | 1458351_s_at | Region | Klhl2         | 77113  | 8  | 63808844  | 63849038  | - |
| 860 | 1433775_at   | Region | C77080        | 97130  | 4  | 128246691 | 128249875 | - |
| 861 | 1437201_at   | Region | 6430556C10Rik | 241568 | 2  | 97172340  | 97336347  | + |
| 862 | 1436275_at   | Region | Kcnp2         | 80906  | 19 | 45341106  | 45363239  | - |
| 863 | 1454713_s_at | Region | Hdc           | 15186  | 2  | 126107521 | 126132518 | - |
| 864 | 1424526_a_at | Region | Tgds          | 76355  | 14 | 112667955 | 112688210 | - |
| 865 | 1455753_at   | Region | None          | None   | 2  | 27042541  | 27043248  | - |
| 866 | 1438320_s_at | Region | Mcm7          | 17220  | 5  | 137137397 | 137144671 | - |
| 867 | 1460211_a_at | Region | Kdelr1        | 68137  | 7  | 39958363  | 39969249  | + |
| 868 | 1460365_a_at | Region | Dnm1          | 13429  | 2  | 32240634  | 32285443  | - |
| 869 | 1429991_at   | Region | 3110069A13Rik | 73191  | 6  | 23296752  | 23300066  | - |
| 870 | 1437279_x_at | Region | Sdc1          | 20969  | 12 | 8087711   | 8110003   | + |
| 871 | 1448125_at   | Region | Rit2          | 19762  | 18 | 31217063  | 31558917  | - |
| 872 | 1418973_at   | Region | Blzf1         | 66352  | 1  | 164208297 | 164225981 | - |
| 873 | 1432543_a_at | Region | Klf13         | 50794  | 7  | 57665144  | 57712634  | - |
| 874 | 1457825_x_at | Region | Tcn2          | 21452  | 11 | 3811977   | 3826370   | - |
| 875 | 1428794_at   | Region | Specc1        | 432572 | 11 | 61946845  | 61948648  | + |
| 876 | 1428349_s_at | Region | Ebf3          | 13593  | 7  | 131562834 | 131681580 | + |
| 877 | 1438245_at   | Region | None          | None   | 4  | 81480904  | 81481899  | - |
| 878 | 1417672_at   | Region | Slc4a10       | 94229  | 2  | 62013606  | 62182126  | + |
| 879 | 1421698_a_at | Region | Col19a1       | 12823  | 1  | 24508650  | 24832568  | - |
| 880 | 1450208_a_at | Region | Elmo1         | 140580 | 13 | 19666927  | 20088452  | + |
| 881 | 1451895_a_at | Region | Dhcr24        | 74754  | 4  | 105520055 | 105545691 | + |
| 882 | 1455622_at   | Region | Podxl2        | 319655 | 6  | 89277620  | 89309099  | - |
| 883 | 1455270_at   | Region | None          | None   | 11 | 102600686 | 102601355 | + |
| 884 | 1433796_at   | Region | 2310067E08Rik | 71946  | 9  | 14189509  | 14216547  | - |
| 885 | 1422487_at   | Region | Smad4         | 17128  | 18 | 73873242  | 73937970  | - |
| 886 | 1435461_at   | Region | Magi3         | 99470  | 3  | 103442526 | 103647825 | - |
| 887 | 1454043_a_at | Region | Kcna1         | 16497  | 3  | 64782663  | 65051651  | + |
| 888 | 1423490_at   | Region | Fbxo3         | 57443  | 2  | 103732553 | 103767991 | + |
| 889 | 1441816_at   | Region | 2900056M20Rik | 72997  | X  | 145849613 | 145849894 | - |
| 890 | 1433451_at   | Region | Cdk5r1        | 12569  | 11 | 80202705  | 80206840  | + |
| 891 | 1460617_s_at | Region | Rab6b         | 270192 | 9  | 103083792 | 103160522 | + |
| 892 | 1434728_at   | Region | Gria3         | 53623  | X  | 35922307  | 36197357  | + |
| 893 | 1422638_s_at | Region | Rassf5        | 54354  | 1  | 131025882 | 131094650 | - |
| 894 | 1453059_at   | Region | 2310046A06Rik | 69642  | 9  | 77240964  | 77487092  | - |
| 895 | 1448110_at   | Region | Sema4a        | 20351  | 3  | 88179823  | 88199543  | - |

|     |              |        |                     |        |    |           |           |   |
|-----|--------------|--------|---------------------|--------|----|-----------|-----------|---|
| 896 | 1418105_at   | Region | Stmn4               | 56471  | 14 | 60871795  | 60889100  | + |
| 897 | 1416098_at   | Region | Syngn3              | 20974  | 17 | 22489447  | 22494793  | - |
| 898 | 1434526_at   | Region | Abhd7               | 384214 | 5  | 106474000 | 106500340 | + |
| 899 | 1437398_a_at | Region | Aldh9a1             | 56752  | 1  | 167283401 | 167301474 | + |
| 900 | 1443694_at   | Region | Rgs20               | 58175  | 1  | 4870637   | 4980278   | - |
| 901 | 1441298_at   | Region | Spnb3               | 20743  | 19 | 4500013   | 4541142   | + |
| 902 | 1429958_x_at | Region | Haghl               | 68977  | 17 | 23588825  | 23591333  | - |
| 903 | 1424351_at   | Region | Wfdc2               | 67701  | 2  | 164019449 | 164025239 | + |
| 904 | 1426814_at   | Region | AU024582            | 227648 | 2  | 26341598  | 26360508  | - |
| 905 | 1450994_at   | Region | Rock1               | 19877  | 18 | 10112811  | 10226661  | - |
| 906 | 1434373_at   | Region | B930006L02Rik       | 319604 | 7  | 94813378  | 94948322  | + |
| 907 | 1454640_at   | Region | Chchd7              | 66433  | 4  | 3866060   | 3870669   | + |
| 908 | 1433761_at   | Region | 9430063L05Rik       | 229622 | 3  | 97225124  | 97254244  | - |
| 909 | 1437087_at   | Region | ---                 | 433926 | 5  | 104549819 | 104552148 | + |
| 910 | 1439709_at   | Region | None                | None   | 3  | 67891194  | 67891850  | + |
|     |              |        | Tubb2 ///           |        |    |           |           |   |
|     |              |        | 2410129E14Rik ///   |        |    |           |           |   |
| 911 | 1427347_s_at | Region | LOC544939           | 22151  | 13 | 33608787  | 33612497  | - |
| 912 | 1428493_at   | Region | 2610511M17Rik       | 74206  | 7  | 24731997  | 24751850  | - |
| 913 | 1428340_s_at | Region | Atp13a2             | 74772  | 4  | 139868189 | 139888591 | + |
|     |              |        | H2-D1 /// H2-K1 /// |        |    |           |           |   |
|     |              |        | H2-L /// LOC56628   |        |    |           |           |   |
| 914 | 1424948_x_at | Region | /// LOC547343       | 14964  | 17 | 186801    | 249200    | - |
| 915 | 1436518_at   | Region | Usp46               | 69727  | 5  | 72834085  | 72900782  | - |
| 916 | 1435649_at   | Region | Nexn                | 68810  | 3  | 151218385 | 151247664 | - |
| 917 | 1434314_s_at | Region | Rab11fip5           | 52055  | 6  | 85684683  | 85724625  | - |
| 918 | 1437125_at   | Region | Camk2a              | 12322  | 18 | 61150958  | 61213470  | + |
| 919 | 1427754_a_at | Region | Dnm1                | 13429  | 2  | 32240634  | 32285443  | - |
| 920 | 1455669_at   | Region | Wdr19               | 213081 | 5  | 64001542  | 64062244  | + |
| 921 | 1423759_a_at | Region | Tmco1               | 68944  | 1  | 167241924 | 167267166 | + |
| 922 | 1452661_at   | Region | Tfrc                | 22042  | 16 | 31419658  | 31443429  | + |
| 923 | 1433642_at   | Region | Arfrp2              | 218639 | 13 | 110208602 | 110571472 | + |
| 924 | 1434382_at   | Region | Tde2l               | 230779 | 4  | 129280610 | 129302666 | - |
| 925 | 1425228_a_at | Region | Dguok               | 27369  | 6  | 83824448  | 83851125  | - |
| 926 | 1429798_s_at | Region | Cklfs5              | 67272  | 14 | 49452973  | 49454996  | + |
| 927 | 1417994_a_at | Region | Accn1               | 11418  | 11 | 80605839  | 80878562  | - |
| 928 | 1438986_x_at | Region | Rps17               | 20068  | 7  | 75150291  | 75152774  | - |
| 929 | 1434594_at   | Region | B230373P09Rik       | 218878 | 14 | 29392221  | 29395109  | - |
| 930 | 1436413_at   | Region | None                | None   | 10 | 34673008  | 34673747  | + |
| 931 | 1448877_at   | Region | Dlx2                | 13392  | 2  | 71241152  | 71244484  | - |
| 932 | 1426766_at   | Region | 6330403K07Rik       | 103712 | 11 | 70757608  | 70759113  | - |
| 933 | 1428254_at   | Region | Purb                | 19291  | 11 | 6369560   | 6370704   | - |
| 934 | 1449697_s_at | Region | Mfn1                | 67414  | 3  | 31937664  | 31985854  | + |
| 935 | 1456410_at   | Region | AU045128            | 102704 | 9  | 98856379  | 98857903  | + |
| 936 | 1418206_at   | Region | Sdf2l1              | 64136  | 16 | 15901089  | 15903316  | - |
| 937 | 1426915_at   | Region | Dapk1               | 69635  | 13 | 59260847  | 59420940  | + |
| 938 | 1418713_at   | Region | Pcbd1               | 13180  | 10 | 61051323  | 61056283  | + |
| 939 | 1434424_at   | Region | 9630055N22Rik       | 226844 | 1  | 190742113 | 190762233 | - |
| 940 | 1450243_a_at | Region | Dscr1l1             | 53901  | 17 | 41306763  | 41542936  | + |
| 941 | 1451237_s_at | Region | Rbm7                | 67010  | 9  | 48506080  | 48512677  | - |
| 942 | 1416190_a_at | Region | Sec61a1             | 53421  | 6  | 88938985  | 88954178  | - |
| 943 | 1444361_at   | Region | None                | None   | X  | 157529000 | 157529867 | + |
| 944 | 1445194_at   | Region | Cnksr2              | 245684 | X  | 151420978 | 151642515 | - |
| 945 | 1447903_x_at | Region | Ap1s2               | 108012 | X  | 157508565 | 157528951 | + |
| 946 | 1429906_at   | Region | A930035E12Rik       | 77966  | 12 | 85017383  | 85018388  | + |
| 947 | 1421527_at   | Region | Epha6               | 13840  | 16 | 58635452  | 59588354  | - |
| 948 | 1434174_at   | Region | Lysmd3              | 80289  | 13 | 77731587  | 77745673  | + |
| 949 | 1452958_at   | Region | 2900006N09Rik       | 72898  | 5  | 111455434 | 111462202 | - |
| 950 | 1418196_at   | Region | Tep1                | 21745  | 14 | 45918453  | 45965182  | - |
| 951 | 1433600_at   | Region | None                | None   | 19 | 53626546  | 53627860  | + |
| 952 | 1419392_at   | Region | Pclo                | 26875  | 5  | 13968048  | 14249123  | + |
| 953 | 1435293_at   | Region | 2900022I03Rik       | 72849  | 5  | 8080763   | 8082002   | - |
| 954 | 1434783_at   | Region | D15Ertd405e         | 380967 | 15 | 98040510  | 98045837  | + |
| 955 | 1455729_at   | Region | Gnaq                | 14682  | 19 | 15357188  | 15609698  | + |
| 956 | 1428552_at   | Region | 2610001J05Rik       | 66520  | 6  | 13856851  | 13858416  | - |

|      |              |        |               |        |    |           |           |   |
|------|--------------|--------|---------------|--------|----|-----------|-----------|---|
| 957  | 1435482_at   | Region | Fibcd1        | 98970  | 2  | 31745456  | 31778128  | - |
| 958  | 1423383_a_at | Region | Osbpl9        | 100273 | 4  | 108020555 | 108061497 | - |
| 959  | 1442051_at   | Region | Hist2h3c1     | 15077  | 3  | 95735695  | 95736337  | + |
| 960  | 1427331_at   | Region | Adora1        | 11539  | 1  | 134049485 | 134085697 | - |
| 961  | 1436216_s_at | Region | 2610204M08Rik | 70435  | 12 | 108084044 | 108094944 | + |
| 962  | 1436389_at   | Region | 5730596K20Rik | 109168 | 19 | 7208422   | 7249028   | + |
| 963  | 1433722_at   | Region | Akap13        | 233400 | 7  | 69488734  | 69518761  | + |
| 964  | 1428958_at   | Region | Paqr8         | 74229  | 1  | 21115565  | 21163699  | + |
| 965  | 1425467_a_at | Region | Plp1          | 18823  | X  | 130367715 | 130382986 | + |
| 966  | 1434661_at   | Region | Syngr1        | 20972  | 15 | 80144003  | 80172200  | + |
| 967  | 1455106_a_at | Region | Ckb           | 12709  | 12 | 107147477 | 107150388 | - |
| 968  | 1433450_at   | Region | Cdk5r1        | 12569  | 11 | 80202705  | 80206840  | + |
| 969  | 1452751_at   | Region | Ebf3          | 13593  | 7  | 131562834 | 131681580 | - |
| 970  | 1428630_x_at | Region | Haghl         | 68977  | 17 | 23588825  | 23591333  | - |
| 971  | 1433887_at   | Region | Dnajc3        | 19107  | 14 | 113495773 | 113540797 | + |
| 972  | 1417486_at   | Region | Shd           | 20420  | 17 | 53608827  | 53614960  | + |
| 973  | 1439962_at   | Region | 2310010J17Rik | 78329  | 7  | 84115929  | 84121052  | - |
| 974  | 1448513_a_at | Region | Npc2          | 67963  | 12 | 81625079  | 81641589  | - |
| 975  | 1430379_at   | Region | 5830411K21Rik | 78822  | 2  | 45007600  | 45010908  | - |
| 976  | 1424025_at   | Region | BC013529      | 215751 | 10 | 7633427   | 7646395   | - |
| 977  | 1435739_at   | Region | AW208599      | 103436 | 10 | 7579963   | 7582386   | + |
| 978  | 1419639_at   | Region | Efnb2         | 13642  | 8  | 7983291   | 8026630   | - |
| 979  | 1449381_a_at | Region | Pacsin1       | 23969  | 17 | 25451600  | 25507024  | + |
| 980  | 1454961_at   | Region | Synj1         | 104015 | 16 | 90104242  | 90168538  | - |
| 981  | 1448860_at   | Region | Rem2          | 140743 | 14 | 48993511  | 48997845  | + |
| 982  | 1420131_s_at | Region | Pttg1ip       | 108705 | 10 | 77693207  | 77710168  | + |
| 983  | 1449255_a_at | Region | Rpl15         | 66480  | 14 | 16792351  | 16794376  | - |
| 984  | 1424308_at   | Region | Slc24a3       | 94249  | 2  | 144905442 | 145098889 | + |
| 985  | 1422612_at   | Region | Hk2           | 15277  | 6  | 83068853  | 83118265  | - |
| 986  | 1448246_at   | Region | Hdac1         | 433759 | 4  | 128543217 | 128569759 | - |
| 987  | 1436237_at   | Region | Ttc9          | 69480  | 12 | 78486357  | 78523920  | + |
| 988  | 1420996_at   | Region | Plxna3        | 18846  | X  | 68989754  | 69004418  | + |
| 989  | 1418101_a_at | Region | Rtn3          | 20168  | 19 | 7139746   | 7197134   | - |
| 990  | 1442903_at   | Region | 4732423E21Rik | 106967 | 18 | 69800574  | 69801114  | + |
| 991  | 1434581_at   | Region | None          | None   | 6  | 54845740  | 54848176  | + |
| 992  | 1448568_a_at | Region | Slc20a1       | 20515  | 2  | 128712653 | 128725462 | + |
| 993  | 1436168_at   | Region | C730029A08Rik | 320926 | 9  | 95475763  | 95477703  | + |
| 994  | 1433785_at   | Region | Mobp          | 17433  | 9  | 120159695 | 120186044 | + |
| 995  | 1426712_at   | Region | Slc6a15       | 103098 | 10 | 103282390 | 103333555 | + |
| 996  | 1455664_at   | Region | Rtn4r1        | 237847 | 11 | 74919459  | 74992558  | + |
| 997  | 1417217_at   | Region | Magel2        | 27385  | 7  | 56153201  | 56155377  | + |
| 998  | 1415803_at   | Region | Cx3cl1        | 20312  | 8  | 94056398  | 94066599  | + |
| 999  | 1449980_a_at | Region | Gabrd         | 14403  | 4  | 153877342 | 153890424 | - |
| 1000 | 1431920_a_at | Region | 2010004A03Rik | 76527  | 8  | 110039562 | 110103594 | - |
| 1001 | 1435124_at   | Region | LOC328644     | 328644 | 16 | 19374916  | 19377518  | + |
| 1002 | 1424076_at   | Region | Gdpd1         | 66569  | 11 | 86761880  | 86802040  | - |
| 1003 | 1448300_at   | Region | Mgst3         | 66447  | 1  | 167305572 | 167326985 | - |
| 1004 | 1426428_at   | Region | Thap7         | 69009  | 16 | 16298950  | 16302020  | - |
| 1005 | 1434384_at   | Region | Nrip1         | 268903 | 16 | 75376752  | 75458939  | - |
| 1006 | 1455239_at   | Region | 6330512M04Rik | 320802 | 7  | 136739134 | 136785283 | - |
| 1007 | 1440681_at   | Region | None          | None   | 7  | 56869299  | 56869935  | - |
| 1008 | 1436974_at   | Region | A230069A22Rik | 320587 | 4  | 154273946 | 154274605 | - |
| 1009 | 1416519_at   | Region | Rpl36         | 54217  | 17 | 54301885  | 54302698  | + |
| 1010 | 1435495_at   | Region | Adora1        | 11539  | 1  | 134049485 | 134085697 | - |
| 1011 | 1428525_at   | Region | 4930488B01Rik | 75036  | 7  | 13914134  | 13915520  | + |
| 1012 | 1436246_at   | Region | None          | None   | 13 | 14999971  | 15000364  | + |
| 1013 | 1416666_at   | Region | Serpine2      | 20720  | 1  | 80125571  | 80191029  | - |
| 1014 | 1420418_at   | Region | Syt2          | 20980  | 1  | 134496944 | 134599680 | + |
| 1015 | 1416027_at   | Region | Pdcd6         | 18570  | 13 | 70365333  | 70379452  | - |
| 1016 | 1419757_at   | Region | Pitpnm2       | 19679  | 5  | 123290016 | 123387759 | - |
| 1017 | 1421690_s_at | Region | Agp           | 11604  | 8  | 104862326 | 104863926 | - |
| 1018 | 1440441_at   | Region | Fbxl7         | 448987 | 15 | 26776878  | 26777516  | - |
| 1019 | 1448422_at   | Region | Tmed4         | 103694 | 11 | 6165501   | 6169624   | - |
| 1020 | 1422860_at   | Region | Nts           | 67405  | 10 | 102395458 | 102404120 | - |
| 1021 | 1417298_at   | Region | Ebpl          | 68177  | 14 | 55874266  | 55893955  | - |



|      |              |        |               |        |    |           |           |   |
|------|--------------|--------|---------------|--------|----|-----------|-----------|---|
| 1022 | 1417492_at   | Region | Ctsb          | 13030  | 14 | 57653056  | 57676512  | + |
| 1023 | 1429052_at   | Region | Ptprd         | 19266  | 4  | 75002457  | 75004430  | - |
| 1024 | 1415834_at   | Region | Dusp6         | 67603  | 10 | 99243320  | 99247573  | + |
| 1025 | 1452908_at   | Region | MGI:2385920   | 64451  | 10 | 76364477  | 76452959  | - |
| 1026 | 1426436_at   | Region | 8430420C20Rik | 233806 | 7  | 113977993 | 113996553 | + |
| 1027 | 1416604_at   | Region | Cyc1          | 66445  | 15 | 76392379  | 76394790  | + |
| 1028 | 1451033_a_at | Region | Trpc4         | 22066  | 3  | 53790324  | 53952687  | + |
| 1029 | 1436609_a_at | Region | Lrpap1        | 16976  | 5  | 33580650  | 33593377  | - |
| 1030 | 1442701_at   | Region | None          | None   | 6  | 80448295  | 80448876  | + |
| 1031 | 1420980_at   | Region | Pak1          | 18479  | 7  | 91889708  | 91958070  | + |
| 1032 | 1422293_a_at | Region | Kctd1         | 106931 | 18 | 15156946  | 15339485  | - |
| 1033 | 1436121_a_at | Region | Nsmce1        | 67711  | 7  | 119517375 | 119541266 | - |
| 1034 | 1456307_s_at | Region | Adcy7         | 11513  | 8  | 87557754  | 87614390  | + |
| 1035 | 1454079_at   | Region | 4933400F03Rik | 71013  | 10 | 116162615 | 116164435 | + |
| 1036 | 1439232_at   | Region | 1500016L03Rik | 78365  | 11 | 84253668  | 84263823  | + |
| 1037 | 1417823_at   | Region | Gcat          | 26912  | 15 | 79082206  | 79089640  | + |
| 1038 | 1436166_at   | Region | Stox2         | 71069  | 8  | 46138301  | 46167033  | - |
| 1039 | 1443876_at   | Region | Camk2a        | 12322  | 18 | 61150958  | 61213470  | + |
| 1040 | 1418400_at   | Region | Larp6         | 67557  | 9  | 60830665  | 60856345  | + |
| 1041 | 1419283_s_at | Region | Tns1          | 21961  | 1  | 74217097  | 74291359  | - |
| 1042 | 1417364_at   | Region | Eef1g         | 67160  | 19 | 8163745   | 8174725   | + |
| 1043 | 1429918_at   | Region | Arhgap20      | 244867 | 9  | 51837391  | 51925006  | + |
| 1044 | 1435208_at   | Region | Dtx3l         | 209200 | 16 | 34707924  | 34709399  | - |
| 1045 | 1416658_at   | Region | Frzb          | 20378  | 2  | 80109719  | 80145145  | - |
| 1046 | 1448842_at   | Region | Cdo1          | 12583  | 18 | 46934961  | 46950098  | - |
| 1047 | 1416868_at   | Region | Cdkn2c        | 12580  | 4  | 108619781 | 108624277 | - |
| 1048 | 1419415_a_at | Region | Rarg          | 19411  | 15 | 102294300 | 102316638 | - |
| 1049 | 1460192_at   | Region | Osbp1a        | 64291  | 18 | 12943381  | 13129769  | - |
| 1050 | 1423263_at   | Region | H3f3a         | 15078  | 1  | 180756388 | 180767423 | - |
| 1051 | 1450135_at   | Region | Fzd3          | 14365  | 14 | 59729279  | 59780310  | - |
| 1052 | 1428138_s_at | Region | Arl10c        | 67166  | 6  | 109286299 | 109326908 | + |
| 1053 | 1428327_at   | Region | 2310001H13Rik | 67095  | 9  | 121314022 | 121472320 | + |
| 1054 | 1433546_at   | Region | Gns           | 75612  | 10 | 121021344 | 121053499 | + |
| 1055 | 1424140_at   | Region | Gale          | 74246  | 4  | 134846422 | 134849435 | + |
| 1056 | 1452858_at   | Region | Elavl1        | 15568  | 8  | 3643294   | 3667872   | - |
| 1057 | 1420817_at   | Region | Ywhag         | 22628  | 5  | 134921901 | 134948016 | - |
| 1058 | 1415900_a_at | Region | Kit           | 16590  | 5  | 74409260  | 74490904  | + |
| 1059 | 1429183_at   | Region | Pkp2          | 67451  | 16 | 14981080  | 15040447  | + |
| 1060 | 1434149_at   | Region | Tcf4          | 21413  | 18 | 69575005  | 69915006  | + |
| 1061 | 1433630_at   | Region | LOC208158     | 208158 | 16 | 19006863  | 19012935  | - |
| 1062 | 1455822_x_at | Region | Surf4         | 20932  | 2  | 26852201  | 26866090  | - |
| 1063 | 1449031_at   | Region | Cited1        | 12705  | X  | 96848797  | 96853130  | - |
| 1064 | 1451342_at   | Region | Spon1         | 233744 | 7  | 107618725 | 107894210 | + |
| 1065 | 1449296_a_at | Region | Cnp1          | 12799  | 11 | 100396062 | 100402812 | + |
| 1066 | 1437632_at   | Region | None          | None   | X  | 10914261  | 10915967  | - |
| 1067 | 1454786_at   | Region | 5031439G07Rik | 223739 | 15 | 84997544  | 85036545  | - |
| 1068 | 1419073_at   | Region | Tmeff2        | 56363  | 1  | 51228467  | 51488214  | + |
|      |              |        | Rpl12 ///     |        |    |           |           |   |
|      |              |        | LOC432518 /// |        |    |           |           |   |
| 1069 | 1435725_x_at | Region | LOC436225     | 269261 | 2  | 32893888  | 32896203  | + |
| 1070 | 1426758_s_at | Region | Gtl2          | 17263  | 12 | 105023823 | 105039917 | + |
| 1071 | 1448443_at   | Region | Serpini1      | 20713  | 3  | 75287431  | 75372212  | + |
| 1072 | 1434146_at   | Region | None          | None   | 3  | 80415024  | 80415636  | - |
| 1073 | 1418963_at   | Region | 2310047O13Rik | 66960  | 2  | 12263273  | 12335447  | - |
| 1074 | 1455695_at   | Region | 9330109E03Rik | 320852 | 6  | 143668580 | 143669759 | - |
| 1075 | 1439128_at   | Region | 7330412A13Rik | 78143  | 16 | 42512337  | 42513156  | + |
| 1076 | 1439452_x_at | Region | Dnpep         | 13437  | 1  | 75598827  | 75608568  | - |
| 1077 | 1416099_at   | Region | Rpl27         | 19942  | 11 | 101263502 | 101266620 | + |
| 1078 | 1439109_at   | Region | MGC54896      | 381175 | 18 | 70155687  | 70199612  | + |
| 1079 | 1439399_a_at | Region | Rnu22         | 83673  | 19 | 7922713   | 7922989   | + |
| 1080 | 1437510_x_at | Region | Rps17         | 20068  | 7  | 75150291  | 75152774  | - |
| 1081 | 1425710_a_at | Region | Homer1        | 26556  | 13 | 89489518  | 89588558  | + |
| 1082 | 1454966_at   | Region | Itga8         | 241226 | 2  | 12022669  | 12217929  | - |
| 1083 | 1459859_x_at | Region | Chrac1        | 93696  | 15 | 73117409  | 73121072  | + |
| 1084 | 1418937_at   | Region | Dio2          | 13371  | 12 | 86128063  | 86141948  | - |

|      |              |        |               |        |    |           |           |   |
|------|--------------|--------|---------------|--------|----|-----------|-----------|---|
| 1085 | 1456878_at   | Region | Al646023      | 192734 | 10 | 75651869  | 75662070  | - |
| 1086 | 1436333_a_at | Region | Synj1         | 104015 | 16 | 90104242  | 90168538  | - |
| 1087 | 1425481_at   | Region | Cnot6l        | 231464 | 5  | 95087917  | 95179605  | - |
| 1088 | 1434264_at   | Region | Ank2          | 109676 | 3  | 125805551 | 125881703 | - |
| 1089 | 1460219_at   | Region | Mag           | 17136  | 7  | 26310852  | 26327101  | - |
| 1090 | 1423798_a_at | Region | Sui1-rs1      | 20918  | 11 | 100141081 | 100143183 | + |
| 1091 | 1437231_at   | Region | Slitrk6       | 239250 | 14 | 105286271 | 105292757 | - |
| 1092 | 1427162_a_at | Region | Elk4          | 13714  | 1  | 131859694 | 131875481 | + |
| 1093 | 1425213_at   | Region | 6430514L14Rik | 76886  | 9  | 70220291  | 70275848  | - |
| 1094 | 1437670_x_at | Region | Cd151         | 12476  | 7  | 135869384 | 135873464 | + |
| 1095 | 1437598_at   | Region | 7330412A13Rik | 78143  | 16 | 42514338  | 42515067  | + |
| 1096 | 1418610_at   | Region | Slc17a6       | 140919 | 7  | 45791145  | 45840421  | + |
| 1097 | 1424137_at   | Region | Gprin1        | 26913  | 13 | 53347815  | 53351668  | - |
| 1098 | 1437319_at   | Region | Unc13c        | 208898 | 9  | 73612739  | 73778132  | - |
| 1099 | 1435493_at   | Region | Dsp           | 109620 | 13 | 37690386  | 37736832  | + |
| 1100 | 1438244_at   | Region | Nfib          | 18028  | 4  | 81281923  | 81491315  | - |
| 1101 | 1450227_at   | Region | Ankrd6        | 140577 | 4  | 33082828  | 33202298  | - |
| 1102 | 1452890_at   | Region | D630041K24Rik | 320244 | 12 | 82694680  | 82923050  | + |
| 1103 | 1460335_at   | Region | Lysmd3        | 80289  | 13 | 77731587  | 77745673  | + |
| 1104 | 1422649_at   | Region | Cntn6         | 53870  | 6  | 104975254 | 105345616 | + |
| 1105 | 1453326_at   | Region | 3300001A09Rik | 75697  | 9  | 67887614  | 67889106  | + |
| 1106 | 1426215_at   | Region | Ddc           | 13195  | 11 | 11709234  | 11775446  | - |
| 1107 | 1450935_at   | Region | Ercc5         | 22592  | 1  | 44443666  | 44477079  | + |
| 1108 | 1450923_at   | Region | Tgfb2         | 21808  | 1  | 186121756 | 186210661 | - |
| 1109 | 1420338_at   | Region | Alox15        | 11687  | 11 | 70069811  | 70077673  | - |
| 1110 | 1455392_at   | Region | 9630019K15Rik | 320111 | 17 | 215       | 3323      | + |
| 1111 | 1434202_a_at | Region | BC055107      | 268709 | 14 | 5963634   | 5976774   | - |
| 1112 | 1452051_at   | Region | Actr3         | 74117  | 1  | 125220868 | 125263588 | - |
| 1113 | 1448762_at   | Region | Rad17         | 19356  | 13 | 96771115  | 96804715  | - |
| 1114 | 1435680_a_at | Region | Dpp7          | 83768  | 2  | 25284452  | 25288494  | - |
| 1115 | 1428377_at   | Region | Btdb11        | 74007  | 10 | 85531912  | 85553015  | + |
| 1116 | 1434170_at   | Region | Wdr40b        | 245404 | X  | 39307366  | 39310947  | - |
| 1117 | 1455477_s_at | Region | Pdzk1ip1      | 67182  | 4  | 114047628 | 114052798 | + |
| 1118 | 1433990_at   | Region | Lhfp13        | 269629 | 5  | 21183622  | 21739491  | + |
| 1119 | 1427108_at   | Region | 9530068E07Rik | 213673 | 11 | 52149269  | 52161564  | + |
| 1120 | 1448366_at   | Region | Stx1a         | 20907  | 5  | 134037064 | 134064591 | + |
| 1121 | 1429060_at   | Region | 9430072K23Rik | 77292  | 19 | 5586926   | 5589348   | - |
| 1122 | 1453412_a_at | Region | Sec14l1       | 74136  | 11 | 116936342 | 116980314 | + |
| 1123 | 1436021_at   | Region | A930031D07Rik | 213006 | 1  | 131888602 | 131919751 | - |
| 1124 | 1428074_at   | Region | 2310037P21Rik | 72309  | 9  | 123277458 | 123278318 | - |
| 1125 | 1435489_at   | Region | None          | None   | 11 | 49877916  | 49878561  | + |
| 1126 | 1434397_at   | Region | Zdhhc17       | 320150 | 10 | 110565885 | 110632856 | - |
| 1127 | 1415993_at   | Region | Sqle          | 20775  | 15 | 59325629  | 59341730  | + |
| 1128 | 1457671_at   | Region | 9330120H11Rik | 319890 | 7  | 75409078  | 75412512  | - |
| 1129 | 1416897_at   | Region | Parp9         | 80285  | 16 | 34719879  | 34754014  | + |
| 1130 | 1435976_at   | Region | None          | None   | 4  | 147439851 | 147444383 | - |
| 1131 | 1429013_at   | Region | 2900002G04Rik | 78283  | X  | 153013977 | 153098157 | + |
| 1132 | 1416165_at   | Region | Rab31         | 106572 | 17 | 63361172  | 63482123  | - |
| 1133 | 1426713_s_at | Region | Eprs          | 107508 | 1  | 184861496 | 184926808 | + |
| 1134 | 1451961_a_at | Region | Mbp           | 17196  | 18 | 82642914  | 82753380  | + |
| 1135 | 1449379_at   | Region | Kdr           | 16542  | 5  | 74767886  | 74784843  | - |
| 1136 | 1432094_a_at | Region | 1700034M03Rik | 73288  | 6  | 3450958   | 3555837   | + |
| 1137 | 1438957_x_at | Region | Cds2          | 110911 | 2  | 131777151 | 131821546 | + |
| 1138 | 1422835_at   | Region | Kcnd2         | 16508  | 6  | 21263145  | 21776841  | + |
| 1139 | 1455256_at   | Region | Tnik          | 69014  | 3  | 27680596  | 28087969  | + |
| 1140 | 1416935_at   | Region | Trpv2         | 22368  | 11 | 62300188  | 62325946  | + |
| 1141 | 1456755_at   | Region | 2310001H13Rik | 67095  | 9  | 121314022 | 121472320 | + |
| 1142 | 1417170_at   | Region | Lztf1l        | 93730  | 9  | 123721311 | 123741507 | - |
| 1143 | 1453342_at   | Region | Cdc40         | 71713  | 10 | 40910293  | 40992658  | - |
| 1144 | 1455725_a_at | Region | H3f3b         | 15081  | 11 | 115843386 | 115845593 | - |
| 1145 | 1460546_at   | Region | Lgi3          | 213469 | 14 | 64846859  | 64854311  | + |
| 1146 | 1442650_at   | Region | Al841723      | 101166 | 3  | 157091448 | 157092001 | - |
| 1147 | 1447788_s_at | Region | AW212607      | 241732 | 2  | 152679307 | 152682319 | - |
| 1148 | 1433555_at   | Region | Eaf1          | 74427  | 14 | 29627014  | 29641729  | + |
| 1149 | 1450108_at   | Region | Kif1a         | 16560  | 1  | 92845769  | 92929313  | - |

|      |              |        |               |        |      |           |           |      |
|------|--------------|--------|---------------|--------|------|-----------|-----------|------|
| 1150 | 1450429_at   | Region | Capn6         | 12338  | X    | 137242282 | 137286776 | -    |
| 1151 | 1433707_at   | Region | Gabra4        | 14397  | 5    | 70350950  | 70437875  | -    |
| 1152 | 1435703_at   | Region | 2810457I06Rik | 72828  | 9    | 40966047  | 41111032  | -    |
| 1153 | 1429965_at   | Region | 2900060P06Rik | 381338 | 1    | 39090578  | 39092045  | -    |
| 1154 | 1436033_at   | Region | BC031353      | 235493 | 9    | 75115155  | 75171307  | +    |
| 1155 | 1455235_x_at | Region | Ldh2          | 16832  | 6    | 143333518 | 143351212 | -    |
| 1156 | 1449202_at   | Region | Sema4g        | 26456  | 19   | 44533750  | 44547801  | +    |
| 1157 | 1425532_a_at | Region | Bin1          | 30948  | 18   | 32617401  | 32675875  | +    |
| 1158 | 1435343_at   | Region | Dock10        | 210293 | 1    | 80833085  | 80997044  | -    |
| 1159 | 1424474_a_at | Region | Camkk2        | 207565 | 5    | 121886097 | 121917203 | -    |
| 1160 | 1423551_at   | Region | Cdh13         | 12554  | 8    | 118009574 | 118667271 | +    |
| 1161 | 1437912_at   | Region | lqsec3        | 243621 | 6    | 121804773 | 121905505 | -    |
| 1162 | 1438120_x_at | Region | None          | None   | X    | 68675461  | 68675625  | -    |
| 1163 | 1417930_at   | Region | Nab2          | 17937  | 10   | 127397629 | 127403388 | -    |
| 1164 | 1450754_at   | Region | Cacna2d2      | 56808  | 9    | 107465393 | 107594839 | +    |
| 1165 | 1417287_at   | Region | H13           | 14950  | 2    | 152126435 | 152163760 | +    |
| 1166 | 1421727_at   | Region | Eya1          | 14048  | 1    | 14348042  | 14481971  | -    |
| 1167 | 1438217_at   | Region | MGI:1926224   | 268859 | 16   | 6740061   | 7081334   | +    |
| 1168 | 1434348_at   | Region | Fez2          | 225020 | 17   | 76193990  | 76234701  | -    |
| 1169 | 1433744_at   | Region | Al841794      | 211187 | 6    | 119747399 | 119762999 | -    |
| 1170 | 1434499_a_at | Region | Ldh2          | 16832  | 6    | 143333518 | 143351212 | -    |
| 1171 | 1422587_at   | Region | Tmem45a       | 56277  | 16   | 55709150  | 55790956  | -    |
| 1172 | 1436037_at   | Region | ltga4         | 16401  | 2    | 78953394  | 79028523  | +    |
| 1173 | 1418084_at   | Region | Nrp1          | 18186  | 8    | 127666747 | 127814326 | +    |
| 1174 | 1449967_at   | Region | Sim1          | 20464  | 10   | 51089397  | 51182898  | +    |
| 1175 | 1434008_at   | Region | Scn4b         | 399548 | 9    | 45142396  | 45142988  | +    |
| 1176 | 1427568_a_at | Region | Wdr56         | 68259  | 3    | 68563024  | 68674987  | -    |
| 1177 | 1436302_at   | Region | 2410193C02Rik | 76775  | 8    | 77722695  | 77944758  | +    |
| 1178 | 1451276_at   | Region | E030041M21Rik | 75089  | 10   | 89716350  | 89789724  | +    |
| 1179 | 1456310_a_at | Region | 2610002J02Rik | 67513  | 4    | 153742328 | 153749046 | +    |
| 1180 | 1426661_at   | Region | Rpl27a        | 26451  | 7    | 103372068 | 103375226 | +    |
| 1181 | 1433900_at   | Region | 0610007L01Rik | 71667  | 5    | 129392160 | 129415495 | +    |
| 1182 | 1423942_a_at | Region | Camk2g        | 12325  | 14   | 19096195  | 19155342  | -    |
| 1183 | 1419536_a_at | Region | Rela          | 19697  | 19   | 5426521   | 5436920   | +    |
| 1184 | 1431046_at   | Region | 2410127E16Rik | 76787  | 7    | 39415815  | 39438364  | -    |
| 1185 | 1441930_x_at | Region | None          | None   | NONE | NONE      | NONE      | NONE |
| 1186 | 1424413_at   | Region | Ogfrl1        | 70155  | 1    | 23503663  | 23655192  | -    |
| 1187 | 1431003_a_at | Region | 2610002J02Rik | 67513  | 4    | 153742328 | 153749046 | +    |
| 1188 | 1416983_s_at | Region | Foxo1         | 56458  | 3    | 51900114  | 51981292  | +    |
| 1189 | 1425981_a_at | Region | Rbl2          | 19651  | 8    | 90356622  | 90410210  | +    |
| 1190 | 1455216_at   | Region | Paqr6         | 68957  | 3    | 88108453  | 88174614  | +    |
| 1191 | 1451928_a_at | Region | Rad18         | 58186  | 6    | 113184164 | 113259954 | -    |
| 1192 | 1449410_a_at | Region | Gas5          | 14455  | 1    | 160939881 | 160942671 | +    |
| 1193 | 1418157_at   | Region | Nr2f1         | 13865  | 13   | 74253386  | 74262704  | -    |
| 1194 | 1423298_at   | Region | Add3          | 27360  | 19   | 52767533  | 52814957  | +    |
| 1195 | 1458643_at   | Region | Dtx1          | 14357  | 5    | 119832010 | 119847210 | -    |
| 1196 | 1423958_a_at | Region | 2900001O04Rik | 67515  | 15   | 4971126   | 5003902   | +    |
| 1197 | 1429787_x_at | Region | Zwint         | 52696  | 10   | 72709781  | 72729831  | +    |
| 1198 | 1451431_a_at | Region | D2Bwg0891e    | 52840  | 2    | 163943048 | 163947496 | +    |
| 1199 | 1429685_at   | Region | C030002O17Rik | 78533  | 11   | 42384313  | 42385400  | +    |
| 1200 | 1422637_at   | Region | Rassf5        | 54354  | 1    | 131025882 | 131094650 | -    |
| 1201 | 1459160_at   | Region | None          | None   | 11   | 66092027  | 66092665  | -    |
| 1202 | 1436001_at   | Region | 2310028O11Rik | 433771 | 4    | 137983084 | 137983777 | -    |
| 1203 | 1434520_at   | Region | Sc5d          | 235293 | 9    | 42213010  | 42223066  | -    |
| 1204 | 1420556_at   | Region | Oxt           | 18429  | 2    | 130090026 | 130090841 | +    |
| 1205 | 1422758_at   | Region | Chst2         | 54371  | 9    | 95313309  | 95315530  | -    |
| 1206 | 1426449_a_at | Region | Pja1          | 18744  | X    | 94067507  | 94072041  | -    |
| 1207 | 1428221_at   | Region | 4931406O17Rik | 78267  | 9    | 108517281 | 108531223 | -    |
| 1208 | 1454572_at   | Region | 2810414N06Rik | 71815  | 1    | 151607110 | 151607649 | -    |
| 1209 | 1417147_at   | Region | B230317C12Rik | 56279  | 2    | 26560628  | 26568657  | +    |
| 1210 | 1434354_at   | Region | Maob          | 109731 | X    | 14948222  | 15056304  | -    |
| 1211 | 1454651_x_at | Region | Mbp           | 17196  | 18   | 82642914  | 82753380  | +    |
| 1212 | 1436911_at   | Region | Ss18l1        | 269397 | 2    | 179759467 | 179787159 | +    |
| 1213 | 1449259_at   | Region | Rab3d         | 19340  | 9    | 21797512  | 21808123  | -    |
| 1214 | 1452095_a_at | Region | H47           | 109815 | 7    | 59963883  | 59973627  | +    |

|      |              |        |                        |        |    |           |           |   |
|------|--------------|--------|------------------------|--------|----|-----------|-----------|---|
| 1215 | 1416383_a_at | Region | Pcx                    | 18563  | 19 | 4383136   | 4410488   | + |
| 1216 | 1433536_at   | Region | Lrp11                  | 237253 | 10 | 7454951   | 7490015   | + |
| 1217 | 1418980_a_at | Region | Cnp1                   | 12799  | 11 | 100396062 | 100402812 | + |
| 1218 | 1423309_at   | Region | Tgoln1 /// Tgoln2      | 22134  | 6  | 72943992  | 72950517  | - |
| 1219 | 1428338_at   | Region | 2610039E05Rik          | 78779  | 8  | 122607141 | 122611092 | - |
| 1220 | 1419200_at   | Region | Fxyd7                  | 57780  | 7  | 26450839  | 26459780  | - |
| 1221 | 1415889_a_at | Region | Tra1                   | 22027  | 10 | 86665503  | 86680106  | - |
| 1222 | 1440918_at   | Region | 6330417G04Rik          | 108780 | 13 | 88019522  | 88020769  | - |
| 1223 | 1424581_at   | Region | Stac2                  | 217154 | 11 | 97857711  | 97874549  | - |
| 1224 | 1423247_at   | Region | Txndc4                 | 76299  | 4  | 48110289  | 48195480  | - |
| 1225 | 1429049_at   | Region | Nuak2                  | 74137  | 1  | 132172971 | 132190342 | + |
| 1226 | 1434899_s_at | Region | Tnrc6a                 | 233833 | 7  | 117180427 | 117250357 | + |
| 1227 | 1423569_at   | Region | Gatm                   | 67092  | 2  | 122108325 | 122125112 | - |
| 1228 | 1423156_at   | Region | Gnpnat1                | 54342  | 14 | 40454704  | 40467079  | - |
| 1229 | 1426965_at   | Region | Rap2a                  | 76108  | 14 | 115049793 | 115078176 | + |
| 1230 | 1416250_at   | Region | Btg2                   | 12227  | 1  | 133925590 | 133929382 | - |
| 1231 | 1423757_x_at | Region | Igfbp4                 | 16010  | 11 | 98862347  | 98873733  | + |
| 1232 | 1416701_at   | Region | Rnd3                   | 74194  | 2  | 51062601  | 51081273  | - |
| 1233 | 1439616_at   | Region | None                   | None   | 9  | 68124158  | 68124613  | + |
| 1234 | 1446585_at   | Region | Dlgh2                  | 23859  | 7  | 85860491  | 86494465  | + |
| 1235 | 1438042_at   | Region | Shox2                  | 20429  | 3  | 66645577  | 66654082  | - |
| 1236 | 1419103_a_at | Region | Abhd6                  | 66082  | 14 | 5671130   | 5724783   | + |
| 1237 | 1443177_at   | Region | None                   | None   | 12 | 112043125 | 112043482 | - |
| 1238 | 1420868_s_at | Region | 1110032D12Rik          | 56334  | 5  | 123712134 | 123721846 | + |
| 1239 | 1438723_a_at | Region | Rps10 ///<br>LOC545151 | 545151 | 16 | 19520273  | 19593779  | - |
| 1240 | 1427965_at   | Region | Ssbp1                  | 381760 | 6  | 40612256  | 40622665  | + |
| 1241 | 1417727_at   | Region | Sfrs9                  | 108014 | 5  | 114437561 | 114443646 | + |
| 1242 | 1442865_at   | Region | MGI:3580254            | 331374 | X  | 5112421   | 5185734   | + |
| 1243 | 1460603_at   | Region | Samd9l                 | 209086 | 6  | 3324779   | 3352093   | - |
| 1244 | 1421170_a_at | Region | Plcb1                  | 18795  | 2  | 134734571 | 134986275 | + |
| 1245 | 1442180_at   | Region | Dleu7                  | 239133 | 14 | 56808751  | 56826240  | - |
| 1246 | 1421738_at   | Region | Gabra2                 | 14395  | 5  | 69741965  | 69877243  | - |
| 1247 | 1422847_a_at | Region | Prkcd                  | 18753  | 14 | 28730904  | 28746227  | - |
| 1248 | 1452789_at   | Region | Snn                    | 20621  | 16 | 10567613  | 10569058  | - |
| 1249 | 1421048_a_at | Region | Ypel1                  | 106369 | 16 | 15841589  | 15857966  | + |
| 1250 | 1457733_at   | Region | None                   | None   | 1  | 116614014 | 116615020 | + |
| 1251 | 1426649_at   | Region | Tmeff1                 | 230157 | 4  | 48501115  | 48579053  | + |
| 1252 | 1433449_at   | Region | B930037P14Rik          | 225861 | 19 | 5283700   | 5285818   | - |
| 1253 | 1419450_at   | Region | Ormdl3                 | 66612  | 11 | 98402381  | 98408332  | - |
| 1254 | 1460685_at   | Region | Timm17b                | 21855  | X  | 6138338   | 6146592   | + |
| 1255 | 1456533_at   | Region | Dpy19l1                | 244745 | 9  | 24306726  | 24318597  | - |
| 1256 | 1455870_at   | Region | Akap2                  | 11641  | 4  | 57797608  | 57837140  | + |
| 1257 | 1456444_at   | Region | Fbxo41                 | 330369 | 6  | 85820443  | 85852910  | - |
| 1258 | 1424633_at   | Region | Camk1g                 | 215303 | 1  | 193085118 | 193108993 | - |
| 1259 | 1423101_at   | Region | Paqr4                  | 76498  | 17 | 21538366  | 21542510  | - |
| 1260 | 1418647_at   | Region | Gna-rs1                | 14670  | 17 | 33699699  | 33707887  | + |
| 1261 | 1434864_at   | Region | Nipa1                  | 233280 | 7  | 50247961  | 50289050  | - |
| 1262 | 1426960_a_at | Region | Fa2h                   | 338521 | 8  | 110642730 | 110691404 | - |
| 1263 | 1453514_at   | Region | Gpm6b                  | 14758  | X  | 159838377 | 159988393 | + |
| 1264 | 1450987_a_at | Region | 2310004I24Rik          | 66358  | 11 | 66763555  | 66778244  | - |
| 1265 | 1416514_a_at | Region | Fscn1                  | 14086  | 5  | 142024679 | 142037166 | + |
| 1266 | 1454078_a_at | Region | Gal3st1                | 53897  | 11 | 3878500   | 3894102   | + |
| 1267 | 1422031_a_at | Region | Za20d3                 | 65098  | 7  | 78468968  | 78533265  | - |
| 1268 | 1455603_at   | Region | None                   | None   | 16 | 80735863  | 80736294  | + |
| 1269 | 1428415_at   | Region | Rnf113a                | 66381  | 12 | 81283572  | 81286924  | + |
| 1270 | 1436297_a_at | Region | Grina                  | 66168  | 15 | 76295479  | 76298576  | + |
| 1271 | 1431724_a_at | Region | P2ry12                 | 70839  | 3  | 58866261  | 58912811  | - |
| 1272 | 1436221_at   | Region | D1Erd471e              | 27877  | 1  | 166236488 | 166238034 | + |
| 1273 | 1433444_at   | Region | Hmgcs1                 | 208715 | 13 | 114526    | 140291    | - |
| 1274 | 1453180_at   | Region | 6530404N21Rik          | 67795  | 19 | 32466224  | 32720836  | - |
| 1275 | 1419732_at   | Region | Rtn4r                  | 65079  | 16 | 16898663  | 16923450  | + |
| 1276 | 1434099_at   | Region | None                   | None   | 5  | 50264886  | 50265410  | - |
| 1277 | 1439348_at   | Region | S100a10                | 20194  | 3  | 93272307  | 93281786  | + |
| 1278 | 1449866_at   | Region | Syt2                   | 20980  | 1  | 134496944 | 134599680 | + |

|      |              |        |               |        |    |           |           |   |
|------|--------------|--------|---------------|--------|----|-----------|-----------|---|
| 1279 | 1428146_s_at | Region | Acaa2         | 52538  | 18 | 75014405  | 75041400  | + |
| 1280 | 1458779_at   | Region | 8030445P17Rik | 319569 | 1  | 25971912  | 25972522  | - |
| 1281 | 1445679_at   | Region | None          | None   | X  | 68233480  | 68233849  | + |
| 1282 | 1448557_at   | Region | 1200015N20Rik | 71721  | 10 | 70495074  | 70612698  | + |
| 1283 | 1428812_at   | Region | 1700040L02Rik | 73287  | 10 | 68486259  | 68597178  | - |
| 1284 | 1416882_at   | Region | Rgs10         | 67865  | 7  | 122423435 | 122467551 | - |
| 1285 | 1455262_at   | Region | 0610010D24Rik | 68339  | 12 | 96358158  | 96474441  | - |
| 1286 | 1433445_x_at | Region | Hmgcs1        | 208715 | 13 | 114526    | 140291    | - |
| 1287 | 1428603_at   | Region | Glcci1        | 170772 | 6  | 8234651   | 8573400   | + |
| 1288 | 1421010_at   | Region | Mobp          | 17433  | 9  | 120159695 | 120186044 | + |
| 1289 | 1429648_at   | Region | Slc35a3       | 229782 | 3  | 115439734 | 115481216 | - |
| 1290 | 1419291_x_at | Region | Gas5          | 14455  | 1  | 160939881 | 160942671 | + |
| 1291 | 1436560_at   | Region | AW124694      | 104598 | 11 | 53356297  | 53357090  | + |
| 1292 | 1429089_s_at | Region | 2900026A02Rik | 243219 | 5  | 112159902 | 112240390 | - |
| 1293 | 1423177_a_at | Region | Abi1          | 11308  | 2  | 22882346  | 22926763  | - |
| 1294 | 1422720_at   | Region | Isl1          | 16392  | 13 | 112748913 | 112760636 | - |
| 1295 | 1451894_a_at | Region | Scn8a         | 20273  | 15 | 100993863 | 101098226 | + |
| 1296 | 1437386_at   | Region | Lrrn6a        | 235402 | 9  | 56731964  | 56798742  | - |
| 1297 | 1428774_at   | Region | Gpc6          | 23888  | 14 | 111487529 | 112531234 | + |
| 1298 | 1448850_a_at | Region | Dnajc5        | 13002  | 2  | 181237462 | 181269206 | + |
| 1299 | 1426179_a_at | Region | Twsg1         | 65960  | 17 | 63632504  | 63660568  | - |
| 1300 | 1451520_at   | Region | None          | None   | 3  | 54746476  | 54771659  | + |
| 1301 | 1455978_a_at | Region | Matn2         | 17181  | 15 | 34306355  | 34435949  | + |
| 1302 | 1450976_at   | Region | Ndrp1         | 17988  | 15 | 66953527  | 66993844  | - |
| 1303 | 1428739_at   | Region | 2310040A07Rik | 69638  | 4  | 41776994  | 41779094  | - |
| 1304 | 1439267_x_at | Region | Cox5a         | 12858  | 9  | 57635235  | 57646353  | + |
| 1305 | 1451080_at   | Region | Usp1          | 230484 | 4  | 97898883  | 97910606  | + |
| 1306 | 1460214_at   | Region | Pcp4          | 18546  | 16 | 95949609  | 96007739  | + |
| 1307 | 1460337_at   | Region | Sh3kbp1       | 58194  | X  | 153308006 | 153573572 | + |
| 1308 | 1419165_at   | Region | Zfp260        | 26466  | 7  | 25509675  | 25522233  | + |
| 1309 | 1415780_a_at | Region | Armcx2        | 67416  | X  | 128349086 | 128353933 | - |
| 1310 | 1423819_s_at | Region | Arl6ip1       | 54208  | 7  | 111994757 | 112005420 | - |
| 1311 | 1427288_at   | Region | Apba2         | 11784  | 7  | 58385748  | 58637908  | + |
| 1312 | 1425340_a_at | Region | Ptpna         | 19262  | 2  | 130017323 | 130067876 | + |
| 1313 | 1449404_at   | Region | Pip5k2a       | 18718  | 2  | 18884270  | 19040126  | - |
|      |              |        | Rasgrp2 ///   |        |    |           |           |   |
| 1314 | 1438933_x_at | Region | LOC381240     | 19395  | 19 | 6189186   | 6203901   | + |
| 1315 | 1455498_at   | Region | None          | None   | X  | 66337262  | 66337748  | + |
| 1316 | 1416067_at   | Region | lfrd1         | 15982  | 12 | 36801602  | 36821637  | - |
|      |              |        | Rps12 ///     |        |    |           |           |   |
|      |              |        | LOC432865 /// |        |    |           |           |   |
|      |              |        | LOC546370 /// |        |    |           |           |   |
|      |              |        | LOC546371 /// |        |    |           |           |   |
|      |              |        | LOC546372 /// |        |    |           |           |   |
| 1317 | 1448344_at   | Region | LOC546373     | 20042  | 10 | 58921849  | 58922343  | + |
| 1318 | 1451728_at   | Region | Wdr13         | 73447  | X  | 6362274   | 6371378   | - |
| 1319 | 1422476_at   | Region | lfr30         | 65972  | 8  | 69918030  | 69921905  | - |
| 1320 | 1423640_at   | Region | Synpr         | 72003  | 14 | 11742767  | 12075275  | + |
| 1321 | 1417800_at   | Region | Parp2         | 11546  | 14 | 45902586  | 45915940  | + |
| 1322 | 1448573_a_at | Region | Ceacam10      | 26366  | 7  | 19954879  | 19962377  | + |
|      |              |        | Ube1l ///     |        |    |           |           |   |
| 1323 | 1426970_a_at | Region | D330022A01Rik | 320169 | 9  | 108051045 | 108062994 | + |
| 1324 | 1448845_at   | Region | Rpp25         | 102614 | 9  | 57617748  | 57619093  | + |
| 1325 | 1430222_at   | Region | 9130007G19Rik | 74550  | 2  | 118748953 | 118751113 | - |
| 1326 | 1442175_at   | Region | C030027H14Rik | 77465  | 10 | 121437394 | 121438056 | - |
| 1327 | 1441499_at   | Region | Grid1         | 14803  | 14 | 32951534  | 33710256  | + |
| 1328 | 1436169_at   | Region | C730029A08Rik | 320926 | 9  | 95475763  | 95477703  | + |
| 1329 | 1426030_a_at | Region | Apeh          | 235606 | 9  | 108151317 | 108160355 | - |
| 1330 | 1436225_at   | Region | Trpm2         | 28240  | 10 | 78017488  | 78076254  | - |
| 1331 | 1451446_at   | Region | Antxr1        | 69538  | 6  | 87568334  | 87769510  | - |
| 1332 | 1427239_at   | Region | Wdr10         | 81896  | 6  | 116291063 | 116364225 | + |
| 1333 | 1434007_at   | Region | Gyltl1b       | 228366 | 2  | 92069735  | 92075694  | - |
| 1334 | 1419442_at   | Region | Matn2         | 17181  | 15 | 34306355  | 34435949  | + |
| 1335 | 1415711_at   | Region | Arfgef1       | 211673 | 1  | 10242569  | 10337781  | - |
| 1336 | 1455883_a_at | Region | Lrrtm1        | 74342  | 6  | 77592843  | 77607877  | + |

|      |              |        |                   |        |    |           |           |   |
|------|--------------|--------|-------------------|--------|----|-----------|-----------|---|
| 1337 | 1419063_at   | Region | Ugt8a             | 22239  | 3  | 124748763 | 124839904 | - |
| 1338 | 1447090_s_at | Region | Arl1              | 104303 | 10 | 88703486  | 88716220  | + |
| 1339 | 1424221_at   | Region | Susd4             | 96935  | 1  | 182726092 | 182856756 | + |
| 1340 | 1434743_x_at | Region | Rusc1             | 72296  | 3  | 88827845  | 88837154  | - |
| 1341 | 1436405_at   | Region | Dock4             | 238130 | 12 | 37444962  | 37445597  | + |
| 1342 | 1417428_at   | Region | Gng3              | 14704  | 19 | 8033478   | 8035741   | - |
| 1343 | 1429582_at   | Region | Btbd14a           | 67991  | 2  | 25991155  | 26054942  | - |
| 1344 | 1425415_a_at | Region | Slc1a1            | 20510  | 19 | 28087763  | 28166557  | + |
| 1345 | 1426956_a_at | Region | Trp53bp1          | 27223  | 2  | 120712100 | 120784969 | - |
| 1346 | 1433691_at   | Region | Ppp1r3c           | 53412  | 19 | 36074403  | 36079323  | - |
| 1347 | 1435533_s_at | Region | 4933426K21Rik     | 108653 | 6  | 123118089 | 123137380 | - |
| 1348 | 1459813_at   | Region | 1700012D01Rik     | 72243  | 10 | 127405114 | 127405393 | + |
| 1349 | 1444506_at   | Region | Tram1             | 72265  | 1  | 13697903  | 13722901  | - |
| 1350 | 1417773_at   | Region | Nans              | 94181  | 4  | 46405251  | 46419360  | + |
| 1351 | 1452984_at   | Region | 5730405I09Rik     | 67974  | 18 | 9356614   | 9490220   | - |
| 1352 | 1437224_at   | Region | Rtn4              | 68585  | 11 | 29587737  | 29637706  | + |
| 1353 | 1423038_at   | Region | Stx6              | 58244  | 1  | 155049479 | 155094254 | + |
| 1354 | 1452527_a_at | Region | P2rx4             | 18438  | 5  | 121860532 | 121881953 | + |
| 1355 | 1436573_at   | Region | Scrn3             | 74616  | 2  | 73017517  | 73018501  | + |
| 1356 | 1448404_at   | Region | Scamp2            | 24044  | 9  | 57674914  | 57702719  | + |
| 1357 | 1436479_a_at | Region | Dpp7              | 83768  | 2  | 25284452  | 25288494  | - |
| 1358 | 1438751_at   | Region | E130106K10Rik     | 226781 | 1  | 184949416 | 184967214 | + |
| 1359 | 1444998_at   | Region | None              | None   | 11 | 57539631  | 57540506  | + |
| 1360 | 1416503_at   | Region | Lxn               | 17035  | 3  | 67130310  | 67136218  | - |
| 1361 | 1448258_a_at | Region | Spcs1             | 69019  | 14 | 29131779  | 29133314  | - |
| 1362 | 1457397_at   | Region | 5330411L03Rik     | 101210 | 6  | 30996054  | 31082950  | - |
| 1363 | 1429211_at   | Region | 2900078E11Rik     | 72986  | 16 | 65666556  | 65667775  | - |
| 1364 | 1448606_at   | Region | Edg2              | 14745  | 4  | 58378433  | 58496968  | - |
| 1365 | 1427225_at   | Region | Epn2              | 13855  | 11 | 61242891  | 61305293  | - |
| 1366 | 1423055_at   | Region | Nsg1              | 18196  | 5  | 36643418  | 36665681  | - |
| 1367 | 1427410_at   | Region | Dleu2             | 328425 | 14 | 56136336  | 56215549  | - |
| 1368 | 1421205_at   | Region | Atm               | 11920  | 9  | 53504628  | 53601833  | - |
| 1369 | 1456481_at   | Region | D9Ert280e         | 272636 | 9  | 99209814  | 99258346  | - |
| 1370 | 1426553_at   | Region | Dnajc14           | 74330  | 10 | 128542766 | 128556536 | + |
| 1371 | 1455247_at   | Region | Amotl1            | 75723  | 9  | 14380306  | 14523126  | - |
| 1372 | 1437434_a_at | Region | 5031439A09Rik     | 68151  | 3  | 4597      | 6180      | + |
| 1373 | 1424812_at   | Region | BC017158          | 233913 | 7  | 122321189 | 122347913 | - |
|      |              |        | 1100001I22Rik /// |        |    |           |           |   |
| 1374 | 1438655_a_at | Region | MGC103270         | 434046 | 3  | 40199929  | 40200096  | + |
| 1375 | 1428163_at   | Region | Sara2             | 66397  | 11 | 51516543  | 51544764  | + |
| 1376 | 1418364_a_at | Region | Ftl1              | 14325  | 7  | 6038071   | 6038985   | - |
| 1377 | 1438531_at   | Region | A730054J21Rik     | 320862 | 1  | 178893543 | 178894191 | + |
| 1378 | 1434132_at   | Region | E430025E21Rik     | 223593 | 15 | 59342534  | 59384689  | - |
| 1379 | 1435500_at   | Region | Rab26             | 328778 | 17 | 22332650  | 22337474  | - |
| 1380 | 1428450_at   | Region | 2610034B18Rik     | 70420  | 7  | 73722375  | 73733425  | - |
| 1381 | 1417914_at   | Region | Rap2b             | 74012  | 3  | 61043051  | 61046895  | + |
| 1382 | 1451564_at   | Region | Parp14            | 432411 | 16 | 34614287  | 34652791  | - |
| 1383 | 1448238_at   | Region | 2700060E02Rik     | 68045  | 14 | 18174611  | 18186532  | - |
| 1384 | 1434332_at   | Region | Zzz3              | 108946 | 3  | 151378383 | 151441249 | + |
| 1385 | 1416252_at   | Region | Stk38             | 106504 | 17 | 26773019  | 26811387  | - |
| 1386 | 1438195_at   | Region | Gpd1l             | 333433 | 9  | 114876141 | 114907668 | - |
| 1387 | 1436621_at   | Region | MGI:1933179       | 56013  | 11 | 97332756  | 97396213  | - |
| 1388 | 1416996_at   | Region | Tbc1d8            | 54610  | 1  | 39668412  | 39699827  | - |
| 1389 | 1417638_at   | Region | Lefty1            | 13590  | 1  | 180888879 | 180892220 | + |
| 1390 | 1418077_at   | Region | Trim21            | 20821  | 7  | 96666869  | 96674091  | - |
| 1391 | 1455426_at   | Region | Epha3             | 13837  | 16 | 62549020  | 62869320  | - |
| 1392 | 1456596_at   | Region | 6430550H21Rik     | 245386 | X  | 32718102  | 32773193  | - |
| 1393 | 1455422_x_at | Region | 38599             | 18952  | 11 | 87309123  | 87318531  | + |
| 1394 | 1452480_at   | Region | BC024760          | 228726 | 2  | 145502262 | 145671971 | + |
| 1395 | 1417176_at   | Region | Csnk1e            | 27373  | 15 | 79469142  | 79493293  | - |
| 1396 | 1449093_at   | Region | Ctf1              | 13019  | 7  | 121762467 | 121767916 | + |
| 1397 | 1435307_at   | Region | 6430502M16Rik     | 218440 | 13 | 88593913  | 88608244  | + |
| 1398 | 1426445_at   | Region | Mgea6             | 217615 | 12 | 55862841  | 55923223  | + |
| 1399 | 1421271_at   | Region | Sh3md2            | 59009  | 8  | 60271818  | 60461252  | + |
| 1400 | 1426776_at   | Region | Wasl              | 73178  | 6  | 24663290  | 24714456  | - |

|      |              |        |               |        |    |           |           |   |
|------|--------------|--------|---------------|--------|----|-----------|-----------|---|
| 1401 | 1451536_at   | Region | 1300002C08Rik | 67472  | 3  | 18525595  | 18558156  | + |
| 1402 | 1419253_at   | Region | Mthfd2        | 17768  | 6  | 83649797  | 83661835  | - |
| 1403 | 1421849_at   | Region | Stag2         | 20843  | X  | 36722649  | 36796970  | + |
| 1404 | 1442445_at   | Region | 2610027H17Rik | 71811  | 14 | 4628907   | 4800179   | + |
| 1405 | 1438866_at   | Region | Grin3a        | 242443 | 4  | 49578647  | 49579732  | - |
| 1406 | 1434454_at   | Region | D16Wsu65e     | 28001  | 16 | 3956181   | 3957805   | - |
| 1407 | 1448978_at   | Region | Ngef          | 53972  | 1  | 87293222  | 87326734  | - |
| 1408 | 1423393_at   | Region | Clic4         | 29876  | 4  | 134095226 | 134154017 | - |
| 1409 | 1434394_at   | Region | MGI:2684414   | 333789 | 5  | 64628739  | 64632073  | + |
| 1410 | 1451776_s_at | Region | MGI:1916782   | 74318  | 5  | 76331480  | 76359676  | - |
| 1411 | 1446417_at   | Region | Serpnb6a      | 20719  | 13 | 33449537  | 33467606  | - |
| 1412 | 1429042_at   | Region | 2010200O16Rik | 67495  | 3  | 108352167 | 108358121 | - |
| 1413 | 1428204_at   | Region | C030002O17Rik | 78533  | 11 | 42384313  | 42385400  | + |
| 1414 | 1420644_a_at | Region | Sec61a2       | 57743  | 2  | 5788259   | 5812625   | - |
| 1415 | 1434083_a_at | Region | 4831417L10    | 270162 | 9  | 54022688  | 54079170  | - |
| 1416 | 1433971_at   | Region | Camta1        | 100072 | 4  | 149553741 | 150114842 | - |
| 1417 | 1416000_a_at | Region | Prdx1         | 18477  | 4  | 115644504 | 115658905 | + |
| 1418 | 1434120_a_at | Region | Metap2        | 56307  | 10 | 93834268  | 93863130  | - |
| 1419 | 1454783_at   | Region | Il13ra1       | 16164  | X  | 30732693  | 30791816  | + |
| 1420 | 1434415_at   | Region | None          | None   | 7  | 13837832  | 13838488  | + |
| 1421 | 1426992_at   | Region | Xpr1          | 19775  | 1  | 155171522 | 155308066 | - |
| 1422 | 1426980_s_at | Region | E130012A19Rik | 103551 | 11 | 97448476  | 97450789  | - |
| 1423 | 1454934_at   | Region | Ppm1f         | 68606  | 16 | 15674119  | 15698163  | + |
| 1424 | 1451027_at   | Region | Baiap2        | 108100 | 11 | 119764194 | 119822580 | + |
| 1425 | 1436528_at   | Region | Kazald1       | 107250 | 19 | 44620545  | 44623688  | + |
| 1426 | 1416178_a_at | Region | Plekhh1       | 27276  | 7  | 94750574  | 94769041  | - |
| 1427 | 1440902_at   | Region | A330104H05Rik | 77767  | 2  | 57970654  | 57978291  | - |
| 1428 | 1416696_at   | Region | D17Wsu104e    | 28106  | 17 | 53813582  | 53820961  | - |
| 1429 | 1418080_at   | Region | B4galt2       | 53418  | 4  | 116828165 | 116842060 | - |
| 1430 | 1424478_at   | Region | Bbs2          | 67378  | 8  | 93352126  | 93382983  | - |
| 1431 | 1452024_a_at | Region | Ldb1          | 16825  | 19 | 45579761  | 45586788  | - |
| 1432 | 1448198_a_at | Region | Ndufb8        | 67264  | 19 | 44094660  | 44099821  | - |
| 1433 | 1426024_a_at | Region | Dbn1          | 56320  | 13 | 54082915  | 54100289  | - |
| 1434 | 1422130_at   | Region | Nptx1         | 18164  | 11 | 119360465 | 119368918 | - |
| 1435 | 1431226_a_at | Region | Fndc4         | 64339  | 5  | 29751186  | 29753072  | - |
| 1436 | 1419737_a_at | Region | Ldh1          | 16828  | 7  | 40932461  | 40940831  | + |
| 1437 | 1428051_a_at | Region | Cacna1d       | 12289  | 14 | 28175955  | 28625750  | - |
| 1438 | 1435601_at   | Region | Al481772      | 102105 | 8  | 109241794 | 109242298 | + |
| 1439 | 1430384_at   | Region | Tle4          | 21888  | 19 | 13671934  | 13821845  | - |
| 1440 | 1451461_a_at | Region | Aldoc         | 11676  | 11 | 78048858  | 78052417  | + |
| 1441 | 1418463_at   | Region | Pik3r2        | 18709  | 8  | 69923437  | 69932215  | - |
| 1442 | 1434535_at   | Region | 6330509G02Rik | 268481 | 11 | 99054185  | 99065154  | - |
| 1443 | 1428029_a_at | Region | H2afv         | 77605  | 11 | 6323158   | 6339126   | - |
| 1444 | 1418051_at   | Region | Ephb6         | 13848  | 6  | 41737668  | 41752602  | + |
| 1445 | 1420675_at   | Region | Zfp113        | 56314  | 5  | 137114185 | 137128496 | - |
| 1446 | 1427014_at   | Region | BC026996      | 229541 | 3  | 90077879  | 90090400  | + |
| 1447 | 1451089_a_at | Region | Arcn1         | 213827 | 9  | 44730423  | 44756652  | - |
| 1448 | 1433430_s_at | Region | Cdc23         | 52563  | 18 | 34854705  | 34874773  | - |
| 1449 | 1434856_at   | Region | E130014H08Rik | 329154 | 1  | 54951699  | 55033924  | - |
| 1450 | 1449376_at   | Region | Nicn1         | 66257  | 9  | 108360217 | 108366256 | + |
| 1451 | 1416520_x_at | Region | Rpl36         | 54217  | 17 | 54301885  | 54302698  | + |
| 1452 | 1439041_at   | Region | Slc39a10      | 227059 | 1  | 47099555  | 47145520  | - |
| 1453 | 1417389_at   | Region | Gpc1          | 14733  | 1  | 92659177  | 92687687  | + |
|      |              |        | LOC546318 /// |        |    |           |           |   |
| 1454 | 1440813_s_at | Region | LOC547400     | 546318 | X  | 68432882  | 68433164  | + |
| 1455 | 1436030_at   | Region | B430218L07Rik | 320508 | 4  | 99735584  | 99962654  | + |
| 1456 | 1434746_at   | Region | Mga           | 29808  | 2  | 119416522 | 119478814 | + |
| 1457 | 1435394_s_at | Region | Rhoc          | 11853  | 3  | 104215833 | 104221240 | + |
| 1458 | 1428432_at   | Region | 2310047A01Rik | 71918  | 14 | 24086842  | 24133887  | - |
| 1459 | 1442724_at   | Region | AW060763      | 104993 | 12 | 104941007 | 104941544 | + |
| 1460 | 1435796_at   | Region | 4933413A10Rik | 243220 | 5  | 112678787 | 112702304 | + |
| 1461 | 1435505_at   | Region | Dmwd          | 13401  | 7  | 15944961  | 15951537  | + |
| 1462 | 1421101_a_at | Region | Ldb2          | 16826  | 5  | 43229785  | 43558377  | - |
| 1463 | 1433835_at   | Region | Ppp3cb        | 19056  | 14 | 18861352  | 18907856  | - |
| 1464 | 1421317_x_at | Region | Myb           | 17863  | 10 | 21054488  | 21090667  | - |

|      |              |        |               |        |      |           |           |      |
|------|--------------|--------|---------------|--------|------|-----------|-----------|------|
| 1465 | 1445574_at   | Region | None          | None   | 18   | 61516793  | 61517322  | -    |
| 1466 | 1456196_x_at | Region | Fkbp1a        | 14225  | 2    | 150999557 | 151018627 | +    |
| 1467 | 1454735_at   | Region | Odf2          | 18286  | 2    | 29822262  | 29854701  | +    |
| 1468 | 1417025_at   | Region | H2-Eb1        | 14969  | 17   | 32006680  | 32016938  | +    |
| 1469 | 1455972_x_at | Region | Hadhsc        | 15107  | 3    | 130163431 | 130202003 | -    |
| 1470 | 1435095_at   | Region | C030009O12Rik | 77328  | 5    | 70928809  | 70930245  | +    |
| 1471 | 1423343_at   | Region | Slco1c1       | 58807  | 6    | 142330181 | 142375353 | +    |
| 1472 | 1455146_at   | Region | C230082I21Rik | 99105  | 2    | 37502030  | 37502862  | -    |
| 1473 | 1416483_at   | Region | Ttc3          | 22129  | 16   | 93778128  | 93866771  | +    |
| 1474 | 1433924_at   | Region | Peg3          | 18616  | 7    | 5909405   | 5933864   | -    |
| 1475 | 1449859_at   | Region | Golt1b        | 66964  | 6    | 143230512 | 143247127 | +    |
| 1476 | 1423248_at   | Region | Nktr          | 18087  | 9    | 121733384 | 121771319 | +    |
| 1477 | 1460613_x_at | Region | Gh            | 14599  | 11   | 106121357 | 106122899 | -    |
| 1478 | 1434497_at   | Region | None          | None   | NONE | NONE      | NONE      | NONE |
| 1479 | 1415882_at   | Region | Ghitm         | 66092  | 14   | 35253316  | 35267764  | -    |
| 1480 | 1453204_at   | Region | 4933431K14Rik | 71295  | 9    | 86079689  | 86081337  | +    |
| 1481 | 1448124_at   | Region | Gusb          | 110006 | 5    | 129158844 | 129172652 | -    |
| 1482 | 1422474_at   | Region | Pde4b         | 18578  | 4    | 101213908 | 101564744 | +    |
| 1483 | 1452251_at   | Region | Nbea          | 26422  | 3    | 55257927  | 55816432  | -    |
| 1484 | 1454917_at   | Region | AU045404      | 380959 | 15   | 90277186  | 90329435  | +    |
| 1485 | 1419688_at   | Region | Gpc6          | 23888  | 14   | 111487529 | 112531234 | +    |
| 1486 | 1428599_at   | Region | 2410012C07Rik | 76484  | 7    | 134335528 | 134339092 | +    |
| 1487 | 1449298_a_at | Region | Pde1a         | 18573  | 2    | 79532205  | 79826720  | -    |
| 1488 | 1422502_at   | Region | Parp1         | 11545  | 1    | 180523221 | 180555500 | +    |
| 1489 | 1437626_at   | Region | Zfp36l2       | 12193  | 17   | 82018935  | 82021427  | -    |
| 1490 | 1419093_at   | Region | Tdo2          | 56720  | 3    | 81687472  | 81704788  | -    |
| 1491 | 1435972_at   | Region | Cast          | 12380  | 13   | 70751497  | 70865131  | -    |
| 1492 | 1435515_at   | Region | None          | None   | 14   | 19118082  | 19118783  | -    |
| 1493 | 1434620_s_at | Region | 2610024E20Rik | 225358 | 18   | 34665373  | 34729845  | -    |
| 1494 | 1448252_a_at | Region | Eef1b2        | 55949  | 1    | 63470149  | 63472674  | +    |
| 1495 | 1424040_at   | Region | Parcc1        | 245877 | 4    | 125259280 | 125283395 | -    |
| 1496 | 1452866_at   | Region | Nars          | 70223  | 18   | 64732225  | 64749104  | -    |
| 1497 | 1449196_a_at | Region | Rps27a        | 78294  | 11   | 29440636  | 29442640  | -    |
| 1498 | 1440376_at   | Region | None          | None   | 6    | 85819494  | 85820216  | -    |
| 1499 | 1452692_a_at | Region | Ndufv2        | 72900  | 17   | 63788360  | 63810997  | -    |
| 1500 | 1437723_s_at | Region | Derl1         | 67819  | 15   | 57878521  | 57901434  | -    |
| 1501 | 1452139_at   | Region | Slc35c1       | 228368 | 2    | 92157447  | 92165201  | -    |
| 1502 | 1426901_s_at | Region | Camta2        | 216874 | 11   | 70395124  | 70413592  | -    |
| 1503 | 1439606_at   | Region | Katnal1       | 231912 | 5    | 147773013 | 147825570 | -    |
| 1504 | 1417305_at   | Region | Apeg1         | 11790  | 1    | 75666020  | 75723037  | +    |
| 1505 | 1435396_at   | Region | None          | None   | 12   | 41598176  | 41600796  | -    |
| 1506 | 1436800_at   | Region | Fstl5         | 213262 | 3    | 75804137  | 76439608  | +    |
| 1507 | 1436946_s_at | Region | Gng5          | 14707  | 3    | 145476441 | 145482098 | +    |
| 1508 | 1421899_a_at | Region | Mr1           | 15064  | 1    | 155018615 | 155037520 | -    |
| 1509 | 1426522_at   | Region | Hadhb         | 231086 | 5    | 28621184  | 28642098  | +    |
| 1510 | 1455537_at   | Region | 6430547I21Rik | 320521 | 3    | 17126312  | 17128949  | +    |
| 1511 | 1436470_at   | Region | Rims2         | 116838 | 15   | 39098033  | 39582362  | +    |
| 1512 | 1454788_at   | Region | Arl7          | 320982 | 1    | 88517718  | 88521248  | -    |
| 1513 | 1434678_at   | Region | Al661274      | 102927 | X    | 45634297  | 45635916  | -    |
| 1514 | 1424143_a_at | Region | Ris2          | 67177  | 8    | 121949602 | 121954717 | +    |
| 1515 | 1419672_at   | Region | Spock1        | 20745  | 13   | 56048889  | 56210903  | -    |
| 1516 | 1438196_at   | Region | Gpd1l         | 333433 | 9    | 114876141 | 114907668 | -    |
| 1517 | 1455144_s_at | Region | AU040829      | 216831 | 11   | 64727689  | 64888611  | -    |
| 1518 | 1460643_at   | Region | Eil           | 13716  | 8    | 69695398  | 69749177  | +    |
| 1519 | 1423445_at   | Region | Rock1         | 19877  | 18   | 10112811  | 10226661  | -    |
| 1520 | 1441139_at   | Region | B330003H21    | 328186 | 13   | 12222687  | 12223343  | -    |
| 1521 | 1416600_a_at | Region | Dscr1         | 54720  | 16   | 91551471  | 91559574  | -    |
| 1522 | 1433564_at   | Region | Dgkd          | 227333 | 1    | 87696734  | 87764305  | +    |
| 1523 | 1422731_at   | Region | Limd1         | 29806  | 9    | 123502410 | 123545221 | +    |
| 1524 | 1416028_a_at | Region | Hn1           | 15374  | 11   | 115318446 | 115335463 | -    |
| 1525 | 1424796_at   | Region | 1700054N08Rik | 73420  | 8    | 123127903 | 123147281 | -    |
| 1526 | 1416384_a_at | Region | Cope          | 59042  | 8    | 69455886  | 69466091  | +    |
| 1527 | 1434380_at   | Region | None          | None   | 3    | 141517257 | 141519121 | +    |
| 1528 | 1453087_at   | Region | 6330403L08Rik | 70744  | 5    | 137997632 | 137998638 | +    |
| 1529 | 1427430_at   | Region | Al848100      | 226551 | 1    | 161723956 | 161783029 | -    |



|      |              |        |               |        |    |           |           |   |
|------|--------------|--------|---------------|--------|----|-----------|-----------|---|
| 1530 | 1422485_at   | Region | Smad4         | 17128  | 18 | 73873242  | 73937970  | - |
| 1531 | 1422635_at   | Region | Ache          | 11423  | 5  | 136240796 | 136248427 | + |
| 1532 | 1440639_at   | Region | Dlgap1        | 224997 | 17 | 68195196  | 68591524  | + |
| 1533 | 1437660_at   | Region | Nktr          | 18087  | 9  | 121733384 | 121771319 | + |
| 1534 | 1423237_at   | Region | Galnt1        | 14423  | 18 | 24433937  | 24514141  | + |
| 1535 | 1436731_at   | Region | Zfp533        | 241494 | 2  | 77108849  | 77514565  | - |
| 1536 | 1417746_at   | Region | Cplx1         | 12889  | 5  | 107594772 | 107626145 | - |
| 1537 | 1452919_a_at | Region | 1700012G19Rik | 67078  | 17 | 22274058  | 22275187  | + |
| 1538 | 1425610_s_at | Region | Galnt2        | 108148 | 8  | 123518466 | 123632794 | + |
| 1539 | 1450955_s_at | Region | Sort1         | 20661  | 3  | 108079874 | 108157253 | + |
| 1540 | 1434559_at   | Region | Stx3          | 20908  | 19 | 10973053  | 11015388  | - |
| 1541 | 1423941_at   | Region | Camk2g        | 12325  | 14 | 19096195  | 19155342  | - |
| 1542 | 1419383_at   | Region | None          | None   | 10 | 76355599  | 76362200  | + |
| 1543 | 1424588_at   | Region | Srgap3        | 259302 | 6  | 113281331 | 113392980 | - |
| 1544 | 1418186_at   | Region | Gstt1         | 14871  | 10 | 75885555  | 75900324  | - |
| 1545 | 1435384_at   | Region | Ube2n         | 93765  | 10 | 95491346  | 95521553  | + |
| 1546 | 1417236_at   | Region | Ehd3          | 57440  | 17 | 71586595  | 71613824  | + |
| 1547 | 1452759_s_at | Region | Pfifbp1       | 67533  | 6  | 147815628 | 147958589 | + |
| 1548 | 1456147_at   | Region | st8sia6       | 241230 | 2  | 13570943  | 13719792  | - |
| 1549 | 1416986_a_at | Region | Ptpns1        | 19261  | 2  | 129107171 | 129144785 | + |
| 1550 | 1433740_at   | Region | 2610301K12Rik | 72477  | 2  | 128366491 | 128368115 | + |
| 1551 | 1434655_at   | Region | Foxk1         | 17425  | 5  | 141407513 | 141522715 | + |
| 1552 | 1429514_at   | Region | Ppap2b        | 67916  | 4  | 104116265 | 104190062 | + |
|      |              |        | Ensa ///      |        |    |           |           |   |
| 1553 | 1423330_at   | Region | LOC383218     | 383218 | 17 | 20655458  | 20656273  | + |
| 1554 | 1415911_at   | Region | Impact        | 16210  | 18 | 13160301  | 13180997  | + |
| 1555 | 1434698_at   | Region | 9130229H14Rik | 236520 | 1  | 6211      | 14138     | - |
| 1556 | 1423668_at   | Region | Zdhhc14       | 224454 | 17 | 5400177   | 5659646   | + |
| 1557 | 1424189_at   | Region | Pigc          | 67292  | 1  | 161875729 | 161878832 | + |
| 1558 | 1434325_x_at | Region | Prkar1b       | 19085  | 5  | 138015364 | 138127749 | - |
| 1559 | 1442046_at   | Region | Apxl          | 110380 | X  | 146144399 | 146157734 | - |
| 1560 | 1442659_at   | Region | Pcdh9         | 211712 | 14 | 88351670  | 88356571  | - |
| 1561 | 1451718_at   | Region | Plp1          | 18823  | X  | 130367715 | 130382986 | + |
| 1562 | 1450436_s_at | Region | Dnajb5        | 56323  | 4  | 42869016  | 42874654  | + |
| 1563 | 1435165_at   | Region | Cntn2         | 21367  | 1  | 132366699 | 132400216 | - |
| 1564 | 1434233_at   | Region | None          | None   | X  | 66483448  | 66485362  | + |
| 1565 | 1422507_at   | Region | Cstb          | 13014  | 10 | 78536450  | 78538362  | + |
| 1566 | 1434601_at   | Region | Amigo2        | 105827 | 15 | 97320999  | 97323588  | - |
| 1567 | 1455400_at   | Region | Ddah1         | 69219  | 3  | 144733606 | 144866062 | + |
| 1568 | 1450026_a_at | Region | B3gnt1        | 53625  | 11 | 22729537  | 22754478  | - |
| 1569 | 1428143_a_at | Region | Pnpla2        | 66853  | 7  | 135857199 | 135862086 | + |
| 1570 | 1426543_x_at | Region | 2310067E08Rik | 71946  | 9  | 14189509  | 14216547  | - |
| 1571 | 1430776_s_at | Region | Ankrd24       | 70615  | 10 | 81777736  | 81784518  | + |
| 1572 | 1444690_at   | Region | Epha5         | 13839  | 5  | 83317214  | 83675897  | - |
| 1573 | 1416186_at   | Region | Pnrc2         | 52830  | 4  | 134752186 | 134755084 | - |
| 1574 | 1434251_at   | Region | Cnot1         | 234594 | 8  | 95001488  | 95088729  | - |
| 1575 | 1455444_at   | Region | Gabra2        | 14395  | 5  | 69741965  | 69877243  | - |
| 1576 | 1440285_at   | Region | Ppp1r9a       | 243725 | 6  | 4856205   | 5118546   | + |
| 1577 | 1434273_at   | Region | A830073O21Rik | 320262 | 7  | 67630614  | 67633709  | - |
| 1578 | 1439104_at   | Region | C230081A13Rik | 244895 | 9  | 56336855  | 56527185  | - |
| 1579 | 1424497_at   | Region | 1110032O16Rik | 68742  | 7  | 120935951 | 120972691 | - |
| 1580 | 1439135_at   | Region | None          | None   | 16 | 64567130  | 64567835  | + |
| 1581 | 1456346_at   | Region | Dnm1          | 13429  | 2  | 32240634  | 32285443  | - |
| 1582 | 1434155_a_at | Region | 2310061I04Rik | 69662  | 17 | 33611840  | 33616255  | - |
| 1583 | 1422620_s_at | Region | Ppap2a        | 19012  | 13 | 109194243 | 109262166 | + |
| 1584 | 1417596_at   | Region | Eppb9         | 27078  | 11 | 61230814  | 61238569  | + |
| 1585 | 1449556_at   | Region | H2-T23        | 15040  | 17 | 33748998  | 33751722  | - |
| 1586 | 1454853_s_at | Region | AI987944      | 233168 | 7  | 35490664  | 35510152  | - |
| 1587 | 1439024_at   | Region | None          | None   | 8  | 24489602  | 24491336  | - |
| 1588 | 1437197_at   | Region | 9430041O17Rik | 234214 | 8  | 44653046  | 44768456  | + |
| 1589 | 1455161_at   | Region | AI504432      | 229694 | 3  | 106835333 | 106846991 | + |
| 1590 | 1435907_at   | Region | Nrxn2         | 18190  | 19 | 6319521   | 6322577   | + |
| 1591 | 1446022_at   | Region | None          | None   | 11 | 88495938  | 88496462  | - |
| 1592 | 1457743_at   | Region | D13Bwg1146e   | 52882  | 13 | 101166216 | 101269810 | - |
| 1593 | 1424314_at   | Region | Prpf3         | 70767  | 3  | 95318454  | 95343585  | - |

|      |              |        |               |        |    |           |           |   |
|------|--------------|--------|---------------|--------|----|-----------|-----------|---|
| 1594 | 1448955_s_at | Region | Cadps         | 27062  | 14 | 10830082  | 11279704  | - |
| 1595 | 1455554_at   | Region | A830039N20Rik | 268723 | 14 | 21656157  | 21657504  | - |
| 1596 | 1449194_at   | Region | Mrps25        | 64658  | 6  | 92621555  | 92631448  | - |
| 1597 | 1457553_at   | Region | Cugbp2        | 14007  | 2  | 6459141   | 6638885   | - |
| 1598 | 1452741_s_at | Region | Gpd2          | 14571  | 2  | 57163836  | 57293151  | + |
| 1599 | 1434418_at   | Region | Lass6         | 241447 | 2  | 68716957  | 68966690  | + |
| 1600 | 1417664_a_at | Region | Ndrg3         | 29812  | 2  | 156384314 | 156427107 | - |
| 1601 | 1417110_at   | Region | Man1a         | 17155  | 10 | 54152456  | 54322172  | - |
| 1602 | 1434920_a_at | Region | Evl           | 14026  | 12 | 104025433 | 104159229 | + |
| 1603 | 1455528_at   | Region | None          | None   | 12 | 66576641  | 66577101  | - |
| 1604 | 1452633_s_at | Region | Aak1          | 269774 | 6  | 87430559  | 87437290  | + |
| 1605 | 1437663_at   | Region | Pigv          | 230801 | 4  | 132621286 | 132633519 | - |
| 1606 | 1418927_a_at | Region | Habp4         | 56541  | 13 | 61546922  | 61571141  | + |
| 1607 | 1423686_a_at | Region | 1110020C13Rik | 66151  | 15 | 102519651 | 102523203 | + |
| 1608 | 1444845_at   | Region | Scfd1         | 76983  | 12 | 48128993  | 48201414  | + |
| 1609 | 1416683_at   | Region | Plxn2         | 140570 | 15 | 89207873  | 89226271  | - |
| 1610 | 1445688_at   | Region | Ece1          | 230857 | 4  | 136743558 | 136846490 | + |
| 1611 | 1452975_at   | Region | Agxt211       | 71760  | 3  | 129547666 | 129565839 | + |
| 1612 | 1434197_at   | Region | Atrn          | 11990  | 2  | 130420349 | 130541594 | + |
| 1613 | 1428181_at   | Region | Etfb          | 110826 | 7  | 37518908  | 37532547  | + |
| 1614 | 1418950_at   | Region | Drd2          | 13489  | 9  | 49378932  | 49446482  | + |
| 1615 | 1457157_at   | Region | Plcl3         | 269437 | 3  | 63364163  | 63519393  | - |
| 1616 | 1436920_at   | Region | Gm78          | 219228 | 14 | 78892177  | 78893367  | + |
| 1617 | 1458518_at   | Region | Cpeb2         | 231207 | 5  | 41990144  | 42042375  | + |
| 1618 | 1442873_at   | Region | None          | None   | 2  | 63826905  | 63827834  | - |
| 1619 | 1445694_at   | Region | None          | None   | 16 | 16302150  | 16302483  | + |
| 1620 | 1434900_at   | Region | Mkl1          | 223701 | 15 | 81065904  | 81097980  | - |
| 1621 | 1431402_at   | Region | Kirrel3       | 67703  | 9  | 34402087  | 34403416  | + |
| 1622 | 1434101_at   | Region | Nfib          | 18028  | 4  | 81281923  | 81491315  | - |
| 1623 | 1437442_at   | Region | None          | None   | 5  | 56936046  | 56936745  | + |
| 1624 | 1455737_at   | Region | C030002B11Rik | 78540  | 10 | 122635292 | 122636363 | + |
| 1625 | 1449947_s_at | Region | Atbf1         | 11906  | 8  | 108012331 | 108254925 | + |
| 1626 | 1420885_a_at | Region | Sez6          | 20370  | 11 | 77656602  | 77704707  | + |
| 1627 | 1449187_at   | Region | Pdgfa         | 18590  | 5  | 137975029 | 137993011 | - |
| 1628 | 1434374_at   | Region | B930006L02Rik | 319604 | 7  | 94813378  | 94948322  | + |
| 1629 | 1418475_at   | Region | Scnn1b        | 20277  | 7  | 115777086 | 115796374 | + |
| 1630 | 1417262_at   | Region | Ptgs2         | 19225  | 1  | 149936845 | 149944738 | + |
| 1631 | 1434342_at   | Region | None          | None   | 10 | 76362390  | 76363021  | + |
| 1632 | 1426216_at   | Region | Cog6          | 67542  | 3  | 52613983  | 52649013  | - |
| 1633 | 1425848_a_at | Region | Dusp26        | 66959  | 8  | 29872480  | 29879865  | + |
| 1634 | 1434993_at   | Region | B830045N13Rik | 215378 | 1  | 146348134 | 146735852 | + |
| 1635 | 1442121_at   | Region | MGI:107562    | 74100  | 9  | 112222231 | 112229149 | - |
| 1636 | 1456043_at   | Region | Usp22         | 216825 | 11 | 60878669  | 60900563  | - |
| 1637 | 1456901_at   | Region | Adamts20      | 223838 | 15 | 94338866  | 94472961  | - |
| 1638 | 1436982_at   | Region | Tnrc6b        | 213988 | 15 | 80975683  | 80982651  | + |
| 1639 | 1427164_at   | Region | Il13ra1       | 16164  | X  | 30732693  | 30791816  | + |
| 1640 | 1421100_a_at | Region | Dab1          | 13131  | 4  | 103326495 | 103639279 | + |
| 1641 | 1427052_at   | Region | Acacb         | 100705 | 5  | 113275892 | 113360303 | + |
| 1642 | 1434194_at   | Region | Mtap2         | 17756  | 1  | 66731470  | 66734648  | + |
| 1643 | 1429723_at   | Region | 6330409N04Rik | 66674  | 14 | 56069017  | 56091598  | - |
| 1644 | 1438282_at   | Region | Syt1          | 20979  | 10 | 108385089 | 108577499 | - |
| 1645 | 1450859_s_at | Region | Ube2d3        | 66105  | 3  | 134321860 | 134350243 | + |
| 1646 | 1416102_at   | Region | Ywhaz         | 22631  | 15 | 36773662  | 36797651  | - |
| 1647 | 1435401_at   | Region | 9430097H08Rik | 264134 | 6  | 38517733  | 38563856  | + |
| 1648 | 1444723_at   | Region | 6530418L21Rik | 109050 | 3  | 105500506 | 105515550 | + |
| 1649 | 1460204_at   | Region | Tec           | 21682  | 5  | 71537285  | 71651490  | - |
| 1650 | 1440973_at   | Region | LOC552874     | 552874 | 3  | 151819591 | 151820548 | - |
| 1651 | 1440167_s_at | Region | Lpp           | 210126 | 16 | 23179019  | 23766559  | + |
| 1652 | 1448223_at   | Region | MGI:1347093   | 26383  | 8  | 90688173  | 90954867  | + |
| 1653 | 1452199_at   | Region | 2700094F01Rik | 72649  | 6  | 30528276  | 30556749  | - |
| 1654 | 1422592_at   | Region | Ctnnd2        | 18163  | 15 | 30163743  | 31021141  | + |
| 1655 | 1417126_a_at | Region | Rpl22l1       | 68028  | 3  | 28222895  | 28224799  | + |
| 1656 | 1438024_at   | Region | 6230416A05Rik | 76137  | 13 | 43101452  | 43122631  | - |
| 1657 | 1455249_at   | Region | ---           | 434372 | 9  | 15580852  | 15583518  | + |
| 1658 | 1438932_at   | Region | LOC381240     | 381240 | 19 | 6191577   | 6192212   | + |

|      |              |        |               |        |    |           |           |   |
|------|--------------|--------|---------------|--------|----|-----------|-----------|---|
| 1659 | 1416232_at   | Region | Olig2         | 50913  | 16 | 90382586  | 90385713  | + |
| 1660 | 1435166_at   | Region | Cntn2         | 21367  | 1  | 132366699 | 132400216 | - |
| 1661 | 1456395_at   | Region | Ppargc1a      | 19017  | 5  | 50268292  | 50364500  | - |
| 1662 | 1450731_s_at | Region | Tnfrsf21      | 94185  | 17 | 40516102  | 40588746  | + |
| 1663 | 1418671_at   | Region | Capn5         | 12337  | 7  | 92168303  | 92224931  | - |
| 1664 | 1438756_at   | Region | None          | None   | 18 | 12439959  | 12440624  | - |
| 1665 | 1418588_at   | Region | Vmp           | 22360  | 13 | 24731917  | 24749826  | - |
| 1666 | 1433561_at   | Region | Centb2        | 78618  | 16 | 29901288  | 29913810  | - |
| 1667 | 1458544_at   | Region | BC059841      | 407813 | 14 | 54175550  | 54176122  | - |
| 1668 | 1448193_at   | Region | 5730403B10Rik | 66626  | 16 | 4438038   | 4462482   | - |
| 1669 | 1428077_at   | Region | 2610024A01Rik | 72160  | 1  | 127326244 | 127520409 | - |
| 1670 | 1435389_at   | Region | None          | None   | X  | 156011354 | 156012086 | - |
| 1671 | 1435431_at   | Region | 2310047M15Rik | 69666  | 13 | 33697486  | 33712682  | + |
| 1672 | 1438975_x_at | Region | Zdhhc14       | 224454 | 17 | 5400177   | 5659646   | + |
| 1673 | 1435518_at   | Region | Rap1b         | 215449 | 10 | 117505589 | 117536966 | - |
| 1674 | 1430030_at   | Region | 5330426P16Rik | 68190  | 16 | 49579380  | 49599175  | - |
| 1675 | 1448944_at   | Region | Nrp1          | 18186  | 8  | 127666747 | 127814326 | + |
| 1676 | 1426412_at   | Region | Neurod1       | 18012  | 2  | 79150390  | 79154385  | - |
| 1677 | 1421880_at   | Region | Mtmr1         | 53332  | X  | 66033251  | 66087687  | + |
| 1678 | 1460061_at   | Region | None          | None   | 14 | 61267286  | 61267926  | + |
| 1679 | 1417997_at   | Region | Ngb           | 64242  | 12 | 83977157  | 83982165  | - |
| 1680 | 1423965_at   | Region | Cd99l2        | 171486 | X  | 66088561  | 66161136  | - |
| 1681 | 1433983_at   | Region | Cnksr3        | 215748 | 10 | 3289639   | 3383481   | + |
| 1682 | 1453286_at   | Region | Plxna2        | 18845  | 1  | 194358488 | 194552987 | + |
| 1683 | 1454926_at   | Region | 4930544G21Rik | 77629  | 1  | 83594365  | 83738121  | - |
|      |              |        | Rps6 ///      |        |    |           |           |   |
|      |              |        | LOC214738 /// |        |    |           |           |   |
|      |              |        | LOC216036 /// |        |    |           |           |   |
|      |              |        | LOC434404 /// |        |    |           |           |   |
| 1684 | 1435817_x_at | Region | LOC545640     | 20104  | 4  | 85840854  | 85843549  | - |
| 1685 | 1429745_at   | Region | LOC434795     | 434795 | X  | 67958433  | 67968419  | + |
| 1686 | 1452864_at   | Region | Med12l        | 329650 | 3  | 58966724  | 58968423  | + |
| 1687 | 1418177_at   | Region | Gabrg2        | 14406  | 11 | 41664694  | 41753515  | - |
| 1688 | 1455741_a_at | Region | Ece1          | 230857 | 4  | 136743558 | 136846490 | + |
| 1689 | 1458693_at   | Region | Scn8a         | 20273  | 15 | 100993863 | 101098226 | + |
| 1690 | 1416509_at   | Region | MGI:1914262   | 107358 | 19 | 40758164  | 40808343  | - |
| 1691 | 1450467_at   | Region | Bsn           | 12217  | 9  | 108169094 | 108256167 | - |
| 1692 | 1445518_at   | Region | Zfhx1b        | 24136  | 2  | 44919283  | 45045178  | - |
| 1693 | 1418342_at   | Region | Recc1         | 19687  | 5  | 64063687  | 64137434  | - |
| 1694 | 1415818_at   | Region | Anxa6         | 11749  | 11 | 54731952  | 54786255  | - |
| 1695 | 1423557_at   | Region | Ifngr2        | 15980  | 16 | 90704258  | 90721171  | + |
| 1696 | 1437064_at   | Region | AW320017      | 103030 | X  | 92920903  | 92922641  | + |
| 1697 | 1416782_s_at | Region | Praf2         | 54637  | X  | 5967511   | 5970003   | + |
| 1698 | 1436051_at   | Region | 9630007J19Rik | 102493 | 9  | 75359415  | 75361268  | + |
| 1699 | 1418299_at   | Region | Dpysl4        | 26757  | 7  | 133487649 | 133503345 | + |
| 1700 | 1455643_s_at | Region | AW550801      | 104662 | 11 | 74623765  | 74634998  | + |
| 1701 | 1435272_at   | Region | ltpkb         | 320404 | 1  | 180285325 | 180377369 | + |
| 1702 | 1426516_a_at | Region | Lpin1         | 14245  | 12 | 15903061  | 15956128  | - |
| 1703 | 1431054_at   | Region | Lsm6          | 78651  | 8  | 21699568  | 21713205  | - |
| 1704 | 1434151_at   | Region | 3300001H21Rik | 70152  | 15 | 100362355 | 100371886 | + |
| 1705 | 1450106_a_at | Region | Evl           | 14026  | 12 | 104025433 | 104159229 | + |
| 1706 | 1438251_x_at | Region | Prss11        | 56213  | 7  | 125247906 | 125297330 | + |
| 1707 | 1434842_s_at | Region | Upf3b         | 68134  | X  | 31712224  | 31730817  | - |
| 1708 | 1443037_at   | Region | Sdfr1         | 20320  | 9  | 58698947  | 58769508  | + |
| 1709 | 1417339_a_at | Region | Dncl1         | 56455  | 5  | 114408049 | 114410560 | - |
| 1710 | 1417263_at   | Region | Ptgs2         | 19225  | 1  | 149936845 | 149944738 | + |
| 1711 | 1449241_at   | Region | Klhl1         | 93688  | 14 | 90574765  | 90989240  | - |
| 1712 | 1427885_at   | Region | Pold4         | 69745  | 19 | 4020727   | 4022421   | + |
| 1713 | 1445504_at   | Region | LOC331392     | 331392 | X  | 19599805  | 19603562  | + |
| 1714 | 1424299_at   | Region | Oma1          | 67013  | 4  | 102272751 | 102325333 | + |
| 1715 | 1421992_a_at | Region | Igfbp4        | 16010  | 11 | 98862347  | 98873733  | + |
| 1716 | 1423039_a_at | Region | Bzw1          | 66882  | 1  | 58698537  | 58711303  | + |
| 1717 | 1439627_at   | Region | Zic1          | 22771  | 9  | 91251432  | 91256620  | - |
| 1718 | 1420877_at   | Region | 38601         | 56526  | X  | 31532799  | 31610011  | - |
| 1719 | 1456730_x_at | Region | Actl6a        | 56456  | 3  | 32116905  | 32135138  | + |

|      |              |        |               |        |    |           |           |   |
|------|--------------|--------|---------------|--------|----|-----------|-----------|---|
| 1720 | 1455377_at   | Region | 4921517B04Rik | 70892  | 3  | 145920695 | 145959435 | + |
| 1721 | 1427404_x_at | Region | LOC433182     | 433182 | 2  | 80535137  | 80536512  | + |
| 1722 | 1427883_a_at | Region | Col3a1        | 12825  | 1  | 45615394  | 45652804  | + |
| 1723 | 1424029_at   | Region | D10Bwg0791e   | 72480  | 10 | 34358352  | 34362182  | + |
| 1724 | 1442434_at   | Region | D8Ertd82e     | 244418 | 8  | 34897933  | 34950616  | + |
| 1725 | 1432418_a_at | Region | Ckmt1         | 12716  | 2  | 120872490 | 120877586 | + |
| 1726 | 1435047_at   | Region | None          | None   | 13 | 106302744 | 106303438 | - |
| 1727 | 1422936_at   | Region | Mas1          | 17171  | 17 | 11664256  | 11691322  | + |
| 1728 | 1457052_at   | Region | AW536275      | 99379  | 2  | 167769088 | 167769585 | - |
| 1729 | 1451017_at   | Region | Sdbcag84      | 66366  | 2  | 155465054 | 155475216 | + |
| 1730 | 1418796_at   | Region | Clec11a       | 20256  | 7  | 38378589  | 38381229  | - |
|      |              |        | Hnrpa3 ///    |        |    |           |           |   |
| 1731 | 1451184_at   | Region | LOC547321     | 229279 | 2  | 75357026  | 75367156  | + |
| 1732 | 1435294_at   | Region | None          | None   | 3  | 95658616  | 95659376  | - |
| 1733 | 1449936_at   | Region | 8430419L09Rik | 74525  | 6  | 135958808 | 135995778 | + |
| 1734 | 1448927_at   | Region | Kcnn2         | 140492 | 18 | 45780779  | 45906508  | + |
| 1735 | 1456377_x_at | Region | 0610025L06Rik | 67803  | 11 | 105977345 | 105981231 | - |
| 1736 | 1433488_x_at | Region | Gns           | 75612  | 10 | 121021344 | 121053499 | + |
| 1737 | 1455771_at   | Region | Bzrap1        | 207777 | 11 | 87505085  | 87513910  | + |
| 1738 | 1430781_at   | Region | Ak7           | 78801  | 12 | 101152976 | 101217778 | + |
| 1739 | 1417962_s_at | Region | Ghr           | 14600  | 15 | 3098508   | 3365766   | - |
| 1740 | 1454676_s_at | Region | Ticam1        | 106759 | 17 | 53906901  | 53909199  | - |
| 1741 | 1460716_a_at | Region | Cbfb          | 12400  | 8  | 104466302 | 104513614 | + |
| 1742 | 1452092_at   | Region | 4631426J05Rik | 77590  | 7  | 126599419 | 126683081 | - |
| 1743 | 1458663_at   | Region | Large         | 16795  | 8  | 71965827  | 72364115  | - |
| 1744 | 1448689_at   | Region | Rras2         | 66922  | 7  | 107899626 | 107913462 | - |
| 1745 | 1428205_x_at | Region | C030002O17Rik | 78533  | 11 | 42384313  | 42385400  | + |
| 1746 | 1434302_at   | Region | Raph1         | 77300  | 1  | 60786474  | 60811912  | - |
| 1747 | 1426493_a_at | Region | Kifc2         | 16581  | 15 | 76710387  | 76719267  | + |
| 1748 | 1421180_at   | Region | Lix1          | 66643  | 17 | 15266766  | 15321520  | + |
| 1749 | 1435957_at   | Region | B830032F12    | 328545 | 15 | 66010277  | 66011218  | - |
| 1750 | 1424773_at   | Region | 1110012M11Rik | 73711  | 8  | 70692174  | 70697270  | + |
| 1751 | 1429427_s_at | Region | Tcf7l2        | 21416  | 19 | 55323190  | 55515901  | + |
| 1752 | 1432029_a_at | Region | Smap1         | 98366  | 1  | 24090771  | 24166945  | - |
| 1753 | 1454645_at   | Region | Mgrn1         | 17237  | 16 | 4555925   | 4608181   | + |
| 1754 | 1422504_at   | Region | Glrp          | 14658  | 3  | 80572600  | 80642620  | - |
| 1755 | 1429316_at   | Region | Rasgef1a      | 70727  | 6  | 118498951 | 118523137 | + |
| 1756 | 1452249_at   | Region | Prickle1      | 106042 | 15 | 93565936  | 93585713  | - |
| 1757 | 1428096_at   | Region | lpo11         | 76582  | 13 | 103003195 | 103145609 | - |
| 1758 | 1429237_at   | Region | Stx16         | 228960 | 2  | 173501228 | 173523314 | + |
| 1759 | 1427358_a_at | Region | Dapk1         | 69635  | 13 | 59260847  | 59420940  | + |
| 1760 | 1449107_at   | Region | Nudt4         | 71207  | 10 | 95523184  | 95539880  | - |
| 1761 | 1455140_at   | Region | A330068P14Rik | 327958 | 11 | 71773188  | 71773870  | - |
| 1762 | 1438857_x_at | Region | None          | None   | X  | 68675460  | 68675830  | - |
| 1763 | 1449044_at   | Region | Eef1e1        | 66143  | 13 | 38186438  | 38199754  | - |
| 1764 | 1448493_at   | Region | Paip2         | 67869  | 18 | 35822332  | 35840850  | + |
| 1765 | 1419033_at   | Region | 2610018G03Rik | 70415  | X  | 45362232  | 45412652  | + |
| 1766 | 1416488_at   | Region | Ccng2         | 12452  | 5  | 92603007  | 92611974  | + |
| 1767 | 1425337_at   | Region | Slc12a5       | 57138  | 2  | 164425052 | 164456464 | + |
| 1768 | 1420474_at   | Region | Mtpn          | 14489  | 6  | 35603109  | 35634015  | - |
| 1769 | 1417056_at   | Region | Psme1         | 19186  | 14 | 50096453  | 50099493  | + |
| 1770 | 1419898_s_at | Region | Zc3h7         | 106205 | 16 | 10466302  | 10505988  | + |
| 1771 | 1448945_at   | Region | Tm4sf11       | 67801  | 8  | 93959067  | 93980414  | - |
| 1772 | 1446001_at   | Region | None          | None   | 10 | 18005297  | 18006064  | + |
| 1773 | 1434326_x_at | Region | Coro2b        | 235431 | 9  | 62539533  | 62656961  | - |
| 1774 | 1423915_at   | Region | Olfml2b       | 320078 | 1  | 170579570 | 170617529 | + |
| 1775 | 1434699_at   | Region | 6030408C04Rik | 217558 | 12 | 48125521  | 48128402  | + |
| 1776 | 1425382_a_at | Region | Aqp4          | 11829  | 18 | 15581082  | 15591914  | - |
| 1777 | 1434997_at   | Region | Cdc2l6        | 78334  | 10 | 40425316  | 40559068  | + |
| 1778 | 1418487_at   | Region | Ripk4         | 72388  | 16 | 97226242  | 97248055  | - |
| 1779 | 1425130_a_at | Region | Ptpn5         | 19259  | 7  | 41163785  | 41219667  | - |
| 1780 | 1447640_s_at | Region | Pbx3          | 18516  | 2  | 34104071  | 34304198  | - |
| 1781 | 1448812_at   | Region | Hpcal1        | 53602  | 12 | 3143      | 3964      | + |
| 1782 | 1430869_a_at | Region | Habp4         | 56541  | 13 | 61546922  | 61571141  | + |
| 1783 | 1455647_at   | Region | AW320017      | 103030 | X  | 92923049  | 92924581  | + |

|      |              |        |                       |        |    |           |           |   |
|------|--------------|--------|-----------------------|--------|----|-----------|-----------|---|
| 1784 | 1454887_at   | Region | Pak2                  | 224105 | 16 | 30827234  | 30888644  | - |
| 1785 | 1436618_at   | Region | Sfxn5                 | 94282  | 6  | 85562775  | 85683140  | - |
| 1786 | 1417798_at   | Region | 1810019J16Rik         | 69073  | 4  | 132488828 | 132491689 | + |
| 1787 | 1436114_at   | Region | G630064H08Rik         | 320680 | 18 | 77576401  | 77581161  | - |
| 1788 | 1421436_at   | Region | Grid2                 | 14804  | 6  | 64146694  | 64904112  | + |
| 1789 | 1425452_s_at | Region | Ptprj /// AW125753    | 105005 | 12 | 13504950  | 13509390  | - |
| 1790 | 1416339_a_at | Region | Prkcsh                | 19089  | 9  | 21892809  | 21904011  | + |
| 1791 | 1457523_at   | Region | 9530056K15Rik         | 320650 | 5  | 142455934 | 142458249 | - |
| 1792 | 1418655_at   | Region | Galg1                 | 14421  | 10 | 126897960 | 126905117 | + |
| 1793 | 1450866_a_at | Region | Mrpl17                | 27397  | 7  | 99924236  | 99925719  | - |
| 1794 | 1436440_at   | Region | B230107K20Rik         | 99450  | 2  | 70969010  | 70969524  | - |
| 1795 | 1416840_at   | Region | Mid1ip1               | 68041  | X  | 8956438   | 8958633   | + |
| 1796 | 1435311_s_at | Region | A230052G17Rik         | 320881 | 10 | 86009692  | 86010327  | - |
| 1797 | 1445565_at   | Region | Hist1h2be             | 319179 | 13 | 23063618  | 23101001  | - |
| 1798 | 1455188_at   | Region | Ephb1                 | 270190 | 9  | 101870245 | 102304441 | - |
| 1799 | 1452624_at   | Region | Lrrtm1                | 74342  | 6  | 77592843  | 77607877  | + |
| 1800 | 1416455_a_at | Region | Cryab                 | 12955  | 9  | 50825084  | 50828959  | + |
| 1801 | 1418984_at   | Region | Inadl                 | 12695  | 4  | 97370899  | 97694676  | + |
| 1802 | 1436811_at   | Region | Kctd3                 | 226823 | 1  | 188502528 | 188539374 | - |
| 1803 | 1456228_x_at | Region | Mbp                   | 17196  | 18 | 82642914  | 82753380  | + |
| 1804 | 1416060_at   | Region | Tbc1d15               | 66687  | 10 | 114883404 | 114937196 | - |
| 1805 | 1445631_at   | Region | LOC545446             | 545446 | 2  | 110281641 | 110292027 | - |
| 1806 | 1441610_at   | Region | N28178                | 230085 | 4  | 42833173  | 42857529  | + |
| 1807 | 1416137_at   | Region | Anxa7                 | 11750  | 14 | 18816589  | 18841128  | - |
| 1808 | 1424946_a_at | Region | 1300002C08Rik         | 67472  | 3  | 18525595  | 18558156  | + |
| 1809 | 1431775_at   | Region | 3100002H09Rik         | 70249  | 4  | 123637323 | 123637916 | - |
| 1810 | 1416785_at   | Region | Kcnp1                 | 70357  | 11 | 33524574  | 33738321  | - |
| 1811 | 1424130_a_at | Region | Ptfr                  | 19285  | 11 | 100779597 | 100791659 | - |
| 1812 | 1452524_a_at | Region | Elavl3                | 15571  | 9  | 21907565  | 21942715  | - |
| 1813 | 1434098_at   | Region | Gla2                  | 237213 | X  | 158728422 | 158926386 | - |
| 1814 | 1422821_s_at | Region | Stard5                | 170460 | 7  | 77488447  | 77498758  | + |
| 1815 | 1448430_a_at | Region | Naca ///<br>LOC432684 | 17938  | 10 | 127772283 | 127785343 | + |
| 1816 | 1428446_at   | Region | MGI:1913996           | 213575 | 17 | 82455944  | 82485015  | + |
| 1817 | 1434968_a_at | Region | Actr3                 | 74117  | 1  | 125220868 | 125263588 | - |
| 1818 | 1418467_at   | Region | Smarcd3               | 66993  | 5  | 23056519  | 23086151  | - |
| 1819 | 1448277_at   | Region | Pold2                 | 18972  | 11 | 5766975   | 5773004   | - |
| 1820 | 1418178_at   | Region | Ina                   | 226180 | 19 | 46566002  | 46575960  | + |
| 1821 | 1440204_at   | Region | 3110039M20Rik         | 67293  | 12 | 46136560  | 46153259  | + |
| 1822 | 1415995_at   | Region | Casp6                 | 12368  | 3  | 128834335 | 128846822 | + |
| 1823 | 1438578_a_at | Region | 1110056N09Rik         | 68815  | 7  | 107169488 | 107223188 | - |
| 1824 | 1438647_x_at | Region | Cetn2                 | 26370  | X  | 67574220  | 67578999  | - |
| 1825 | 1440097_at   | Region | Mirg                  | 373070 | 12 | 105220796 | 105226448 | + |
| 1826 | 1455374_at   | Region | None                  | None   | 2  | 55523046  | 55523687  | + |
| 1827 | 1433695_at   | Region | 1500041B16Rik         | 380686 | 11 | 16973262  | 16974167  | + |
| 1828 | 1449131_s_at | Region | Cd1d1                 | 12479  | 3  | 86740227  | 86743729  | - |
| 1829 | 1425051_at   | Region | Isoc1                 | 66307  | 18 | 58884044  | 58904170  | + |
| 1830 | 1434857_at   | Region | A230106D06Rik         | 232785 | 6  | 48067302  | 48076242  | + |
| 1831 | 1460336_at   | Region | Ppargc1a              | 19017  | 5  | 50268292  | 50364500  | - |
| 1832 | 1427618_at   | Region | Cdh9                  | 12565  | 15 | 16566814  | 16694222  | + |
| 1833 | 1439892_at   | Region | Brsk1                 | 381979 | 7  | 3935848   | 3960888   | + |
| 1834 | 1452342_at   | Region | Apbb2                 | 11787  | 5  | 65067237  | 65384014  | - |
| 1835 | 1419640_at   | Region | Purb                  | 19291  | 11 | 6369560   | 6370704   | - |
| 1836 | 1424805_a_at | Region | 1110039B18Rik         | 68796  | 5  | 29328591  | 29336411  | + |
| 1837 | 1448768_at   | Region | Mog                   | 17441  | 17 | 34771008  | 34782703  | - |
| 1838 | 1436316_at   | Region | 9430029L20Rik         | 109249 | 6  | 91905323  | 91906057  | - |
| 1839 | 1455071_at   | Region | Thpok                 | 22724  | 3  | 89135879  | 89138250  | - |
| 1840 | 1434409_at   | Region | MGC27863              | 278097 | X  | 128293394 | 128296351 | - |
| 1841 | 1423882_at   | Region | Rfwd3                 | 234736 | 8  | 110568533 | 110597811 | - |
| 1842 | 1417836_at   | Region | Gpx7                  | 67305  | 4  | 107359316 | 107365619 | - |
| 1843 | 1423424_at   | Region | Zic3                  | 22773  | X  | 52785357  | 52790617  | + |
| 1844 | 1437049_at   | Region | None                  | None   | 3  | 68985432  | 68986006  | - |
| 1845 | 1452982_at   | Region | A330103N21Rik         | 77773  | 7  | 62113386  | 62117987  | + |
| 1846 | 1456015_x_at | Region | Ndufv1                | 17995  | 19 | 3796295   | 3801515   | - |

|      |              |        |               |        |    |           |           |   |
|------|--------------|--------|---------------|--------|----|-----------|-----------|---|
| 1847 | 1438928_x_at | Region | Ninj1         | 18081  | 13 | 48787060  | 48795764  | + |
| 1848 | 1426236_a_at | Region | Glul          | 14645  | 1  | 153783869 | 153793637 | + |
| 1849 | 1427274_at   | Region | D130054N24Rik | 235315 | 9  | 45876943  | 45920129  | - |
| 1850 | 1456610_at   | Region | Jmjd3         | 216850 | 11 | 69125347  | 69130154  | - |
| 1851 | 1452332_at   | Region | E030025D05Rik | 216613 | 11 | 28283605  | 28479086  | - |
| 1852 | 1423057_at   | Region | Capza2        | 12343  | 6  | 17620542  | 17649978  | + |
| 1853 | 1417101_at   | Region | Hspa2         | 15512  | 12 | 73260264  | 73263026  | + |
| 1854 | 1437351_at   | Region | Cxxc4         | 319478 | 3  | 133121396 | 133143674 | + |
| 1855 | 1438948_x_at | Region | Bzrp          | 12257  | 15 | 83612210  | 83636054  | + |
| 1856 | 1444089_at   | Region | Spnb2         | 20742  | 11 | 29995224  | 30114564  | - |
| 1857 | 1436019_a_at | Region | Trappc1       | 245828 | 11 | 69049638  | 69051452  | + |
| 1858 | 1421990_at   | Region | Syt1          | 20979  | 10 | 108385089 | 108577499 | - |
| 1859 | 1436875_at   | Region | Dnm3          | 103967 | 1  | 161896669 | 162387092 | - |
| 1860 | 1448656_at   | Region | Cacnb3        | 12297  | 15 | 98692259  | 98701666  | + |
| 1861 | 1428883_at   | Region | Tmem57        | 66146  | 4  | 133763662 | 133814033 | - |
| 1862 | 1438206_a_at | Region | 2610042O14Rik | 66460  | 2  | 163917729 | 163922245 | + |
| 1863 | 1454752_at   | Region | Al606861      | 105200 | 13 | 46028781  | 46029393  | + |
| 1864 | 1423806_at   | Region | 2610034N24Rik | 101861 | 7  | 91527289  | 91587665  | + |
| 1865 | 1434957_at   | Region | Cdon          | 57810  | 9  | 35364530  | 35416801  | + |
| 1866 | 1422248_at   | Region | Irs4          | 16370  | X  | 135151041 | 135165260 | - |
| 1867 | 1450964_a_at | Region | Osbpl9        | 100273 | 4  | 108020555 | 108061497 | - |
| 1868 | 1444468_at   | Region | Paqr8         | 74229  | 1  | 21115565  | 21163699  | + |
| 1869 | 1437139_at   | Region | Gira1         | 14654  | 11 | 55267654  | 55360631  | - |
| 1870 | 1416405_at   | Region | Bgn           | 12111  | X  | 68144299  | 68156586  | + |
|      |              |        | Rps10 ///     |        |    |           |           |   |
| 1871 | 1416719_a_at | Region | LOC545151     | 545151 | 16 | 19520273  | 19593779  | - |
| 1872 | 1434136_at   | Region | 6332401O19Rik | 319832 | 6  | 25005181  | 25007613  | - |
| 1873 | 1426885_a_at | Region | Cdk2ap1       | 13445  | 5  | 123516782 | 123525971 | - |
| 1874 | 1446364_at   | Region | Wwp1          | 107568 | 4  | 19537563  | 19635959  | - |
| 1875 | 1422774_at   | Region | 1700088E04Rik | 27660  | 15 | 79186045  | 79192517  | - |
| 1876 | 1450869_at   | Region | Fgf1          | 14164  | 18 | 39062902  | 39142421  | - |
| 1877 | 1425249_a_at | Region | Tyro3         | 22174  | 2  | 119313419 | 119331330 | + |
| 1878 | 1451412_a_at | Region | 0610009H04Rik | 55978  | 11 | 78262095  | 78267132  | + |
| 1879 | 1439887_at   | Region | None          | None   | 1  | 105167738 | 105169546 | - |
| 1880 | 1418582_at   | Region | Cbfa2t3h      | 12398  | 8  | 122011527 | 122080570 | - |
| 1881 | 1434917_at   | Region | Cobl          | 12808  | 11 | 12131470  | 12359592  | - |
| 1882 | 1425157_x_at | Region | 1300010A20Rik | 232670 | 6  | 29741353  | 29765655  | + |
| 1883 | 1416133_at   | Region | C920006C10Rik | 76740  | 15 | 65810937  | 65897708  | + |
| 1884 | 1439933_at   | Region | B430316J06Rik | 402749 | 6  | 94371992  | 94372407  | - |
| 1885 | 1455898_x_at | Region | Slc2a3        | 20527  | 6  | 123394798 | 123409491 | - |
| 1886 | 1442099_at   | Region | Usp31         | 76179  | 7  | 115517588 | 115530585 | - |
| 1887 | 1452084_at   | Region | 2810055E05Rik | 230780 | 3  | 129343014 | 129365699 | - |
| 1888 | 1415764_at   | Region | Zc3h11a       | 70579  | 1  | 133482838 | 133516350 | - |
| 1889 | 1436127_at   | Region | Crhbp         | 12919  | 13 | 91617276  | 91630855  | - |
| 1890 | 1419224_at   | Region | Cecr6         | 94047  | 6  | 120920913 | 120925781 | - |
| 1891 | 1436868_at   | Region | Rtn4r1        | 237847 | 11 | 74919459  | 74992558  | + |
| 1892 | 1453324_at   | Region | 6330509M23Rik | 76155  | 8  | 106357470 | 106358614 | + |
| 1893 | 1417762_a_at | Region | Rpl8          | 26961  | 15 | 76955027  | 76957242  | + |
| 1894 | 1455401_at   | Region | Camkk2        | 207565 | 5  | 121886097 | 121917203 | - |
| 1895 | 1448305_at   | Region | Rab6          | 19346  | 7  | 94714439  | 94748311  | + |
| 1896 | 1426982_at   | Region | Flywch1       | 224613 | 17 | 21557603  | 21565956  | - |
| 1897 | 1425090_s_at | Region | Kcnc4         | 99738  | 3  | 107234132 | 107254727 | - |
| 1898 | 1427191_at   | Region | Npr2          | 230103 | 4  | 43547857  | 43567166  | + |
| 1899 | 1438412_at   | Region | Phf17         | 269424 | 3  | 41010564  | 41046427  | + |
| 1900 | 1417963_at   | Region | Pltp          | 18830  | 2  | 164296251 | 164314349 | - |
| 1901 | 1456331_at   | Region | None          | None   | 7  | 122284255 | 122285468 | - |
| 1902 | 1460558_at   | Region | Gm631         | 269336 | 2  | 118532010 | 118543206 | - |
| 1903 | 1429088_at   | Region | MGI:1925139   | 77889  | 17 | 70694580  | 70718332  | + |
| 1904 | 1424482_at   | Region | Arhgef7       | 54126  | 8  | 11130773  | 11207926  | + |
| 1905 | 1420852_a_at | Region | B3gnt1        | 53625  | 11 | 22729537  | 22754478  | - |
| 1906 | 1418517_at   | Region | Irx3          | 16373  | 8  | 91085097  | 91087946  | - |
| 1907 | 1448584_at   | Region | Rsrc1         | 66880  | 3  | 66658030  | 67030708  | + |
| 1908 | 1433936_at   | Region | 0610010E21Rik | 68332  | 7  | 25734011  | 25734977  | - |
| 1909 | 1424475_at   | Region | Camkk2        | 207565 | 5  | 121886097 | 121917203 | - |
| 1910 | 1437392_at   | Region | LOC433485     | 433485 | 2  | 149287733 | 149461328 | + |

|      |              |        |               |        |    |           |           |   |
|------|--------------|--------|---------------|--------|----|-----------|-----------|---|
| 1911 | 1459678_at   | Region | LOC497255     | 497255 | 15 | 73452060  | 73452490  | + |
| 1912 | 1454715_at   | Region | 0710005M24Rik | 76897  | 3  | 13473156  | 14177658  | + |
| 1913 | 1422822_at   | Region | Stard5        | 170460 | 7  | 77488447  | 77498758  | + |
| 1914 | 1452223_s_at | Region | Gcap14        | 72972  | 14 | 35007246  | 35063441  | - |
| 1915 | 1427501_at   | Region | BC007180      | 209601 | 3  | 153757130 | 153774794 | + |
| 1916 | 1429249_at   | Region | 4833424O15Rik | 75769  | 3  | 116349459 | 116463339 | + |
| 1917 | 1445837_at   | Region | Kcnq5         | 226922 | 1  | 22053602  | 22054434  | - |
| 1918 | 1452363_a_at | Region | Atp2a2        | 11938  | 5  | 121605864 | 121654245 | - |
| 1919 | 1425293_a_at | Region | 1500031H04Rik | 66995  | X  | 130538117 | 130541317 | + |
| 1920 | 1418825_at   | Region | lfi1          | 15944  | 11 | 48618086  | 48624183  | - |
| 1921 | 1430191_at   | Region | 9130004J05Rik | 71603  | 15 | 64302574  | 64303751  | - |
| 1922 | 1443736_at   | Region | 4833412E22Rik | 330010 | 4  | 154536681 | 154551706 | - |
| 1923 | 1439036_a_at | Region | Atp1b1        | 11931  | 1  | 164355219 | 164376238 | - |
| 1924 | 1417073_a_at | Region | Qk            | 19317  | 17 | 8850890   | 8959849   | - |
| 1925 | 1448660_at   | Region | Arhgdig       | 14570  | 17 | 23992353  | 23994520  | - |
| 1926 | 1425701_a_at | Region | Rgs3          | 50780  | 4  | 61651038  | 61793526  | + |
| 1927 | 1428777_at   | Region | Spred1        | 114715 | 2  | 116635298 | 116693185 | + |
| 1928 | 1418232_s_at | Region | Lims1         | 110829 | 10 | 58281059  | 58380568  | + |
| 1929 | 1428322_a_at | Region | Ndufb10       | 68342  | 17 | 22527196  | 22529519  | - |
| 1930 | 1424970_at   | Region | Purg          | 75029  | 8  | 32191926  | 32192989  | + |
| 1931 | 1423946_at   | Region | Pdlim2        | 213019 | 14 | 64480207  | 64493661  | - |
| 1932 | 1431362_a_at | Region | Smoc2         | 64074  | 17 | 12330114  | 12456677  | + |
| 1933 | 1417920_at   | Region | Amn           | 93835  | 12 | 106744502 | 106749817 | + |
| 1934 | 1426016_a_at | Region | Tro           | 56191  | X  | 144179698 | 144191794 | - |
| 1935 | 1457587_at   | Region | None          | None   | 1  | 21625110  | 21625666  | - |
| 1936 | 1449273_at   | Region | Cyfip2        | 76884  | 11 | 45948917  | 46065130  | - |
| 1937 | 1435769_at   | Region | Akap9         | 100986 | 5  | 3934295   | 4086208   | + |
| 1938 | 1423646_at   | Region | Zdhhc3        | 69035  | 9  | 123091926 | 123130868 | - |
| 1939 | 1437158_at   | Region | Nipbl         | 71175  | 15 | 8078809   | 8232047   | - |
| 1940 | 1419634_a_at | Region | Ghrh          | 14601  | 2  | 156786470 | 156822010 | - |
| 1941 | 1416735_at   | Region | Asah1         | 11886  | 8  | 40278299  | 40312261  | - |
| 1942 | 1431745_a_at | Region | 2700069A02Rik | 75553  | 12 | 94197945  | 94213620  | + |
| 1943 | 1443863_at   | Region | Fndc3a        | 319448 | 14 | 66891442  | 67062343  | - |
| 1944 | 1434786_at   | Region | None          | None   | 1  | 134604922 | 134606571 | - |
| 1945 | 1436957_at   | Region | None          | None   | X  | 67093331  | 67094027  | - |
| 1946 | 1422185_a_at | Region | Dia1          | 109754 | 15 | 83204176  | 83222883  | - |
| 1947 | 1452879_at   | Region | Synpo2        | 118449 | 3  | 121904047 | 121951604 | - |
| 1948 | 1434154_at   | Region | Kctd13        | 233877 | 7  | 120978610 | 120995340 | + |
| 1949 | 1426408_at   | Region | 1600010O03Rik | 109120 | 2  | 90722036  | 90724247  | + |
| 1950 | 1455662_x_at | Region | Rps17         | 20068  | 7  | 75150291  | 75152774  | - |
| 1951 | 1424679_at   | Region | Mab2111       | 17116  | 3  | 55415255  | 55417607  | + |
| 1952 | 1438945_x_at | Region | Gja1          | 14609  | 10 | 56627159  | 56640230  | + |
| 1953 | 1437853_x_at | Region | Ndn           | 17984  | 7  | 56122085  | 56123665  | + |
| 1954 | 1427483_at   | Region | Slc25a24      | 229731 | 3  | 108918891 | 108977474 | + |
| 1955 | 1415839_a_at | Region | Npm1          | 18148  | 11 | 33047305  | 33057850  | - |
| 1956 | 1460583_at   | Region | Golt1b        | 66964  | 6  | 143230512 | 143247127 | + |
| 1957 | 1453096_x_at | Region | Rpl27         | 19942  | 11 | 101263502 | 101266620 | + |
| 1958 | 1435463_s_at | Region | Myo1d         | 338367 | 11 | 80309486  | 80505684  | - |
| 1959 | 1451190_a_at | Region | Sbk1          | 104175 | 7  | 120322350 | 120344730 | + |
| 1960 | 1441185_at   | Region | Msi2h         | 76626  | 11 | 88067452  | 88208048  | - |
| 1961 | 1460167_at   | Region | Aldh7a1       | 110695 | 18 | 56744086  | 56781108  | - |
| 1962 | 1450240_a_at | Region | Syt11         | 269589 | 4  | 132214066 | 132223965 | - |
| 1963 | 1416003_at   | Region | Cldn11        | 18417  | 3  | 30561416  | 30575743  | + |
| 1964 | 1434875_a_at | Region | Hmgn3         | 94353  | 9  | 83439717  | 83476376  | - |
| 1965 | 1417576_a_at | Region | Otub2         | 68149  | 12 | 98834218  | 98851823  | + |
| 1966 | 1430252_at   | Region | 3110027N22Rik | 73168  | 2  | 44924163  | 44925451  | - |
| 1967 | 1425796_a_at | Region | Fgfr3         | 14184  | 5  | 32210377  | 32225943  | + |
| 1968 | 1418711_at   | Region | Pdgfra        | 18590  | 5  | 137975029 | 137993011 | - |
| 1969 | 1429861_at   | Region | Pcdh9         | 211712 | 14 | 88351670  | 88356571  | - |
| 1970 | 1437287_at   | Region | 1110020G09Rik | 68646  | 15 | 8873106   | 8912017   | + |
| 1971 | 1444019_at   | Region | Lrrc19        | 100061 | 4  | 93611732  | 93625216  | - |
| 1972 | 1448908_at   | Region | Ppap2b        | 67916  | 4  | 104116265 | 104190062 | + |
| 1973 | 1420682_at   | Region | Chrn1         | 11443  | 11 | 69509694  | 69521601  | - |
| 1974 | 1426511_at   | Region | Susd2         | 71733  | 10 | 75738363  | 75745729  | - |
| 1975 | 1437148_at   | Region | Arpc2         | 76709  | 1  | 74538971  | 74570677  | + |

|      |              |        |                                    |        |      |           |           |      |
|------|--------------|--------|------------------------------------|--------|------|-----------|-----------|------|
| 1976 | 1448700_at   | Region | G0s2                               | 14373  | 1    | 193010932 | 193011864 | -    |
| 1977 | 1449551_at   | Region | Myo1c                              | 17913  | 11   | 75377236  | 75400301  | +    |
| 1978 | 1455402_at   | Region | None                               | None   | 11   | 97218942  | 97219630  | +    |
| 1979 | 1448269_a_at | Region | Klhl13                             | 67455  | X    | 21458211  | 21603993  | -    |
| 1980 | 1416845_at   | Region | Hspa5bp1                           | 98170  | 19   | 10054330  | 10066228  | -    |
| 1981 | 1429738_at   | Region | Myt1l                              | 17933  | 12   | 26094752  | 26491102  | +    |
| 1982 | 1435615_at   | Region | Zfp365                             | 216049 | 10   | 67941416  | 67966217  | -    |
| 1983 | 1422740_at   | Region | Tnfrsf21                           | 94185  | 17   | 40516102  | 40588746  | +    |
| 1984 | 1435967_s_at | Region | Hibadh                             | 58875  | 6    | 52690560  | 52784625  | -    |
| 1985 | 1452585_at   | Region | Mrps28                             | 66230  | 3    | 8789085   | 8910754   | -    |
| 1986 | 1452981_at   | Region | Cntn1                              | 12805  | 15   | 92196046  | 92407969  | +    |
| 1987 | 1418000_a_at | Region | Itm2b                              | 16432  | 14   | 67713666  | 67736706  | -    |
| 1988 | 1432057_a_at | Region | Prdm5                              | 70779  | 6    | 66036866  | 66194195  | +    |
| 1989 | 1423364_a_at | Region | Fts                                | 14339  | 8    | 90409865  | 90421862  | -    |
| 1990 | 1450761_s_at | Region | Rims2                              | 116838 | 15   | 39098033  | 39582362  | +    |
| 1991 | 1442301_at   | Region | AW060742                           | 101823 | 7    | 13938474  | 13939064  | +    |
| 1992 | 1416532_at   | Region | Trrap                              | 100683 | 5    | 143879388 | 143901968 | +    |
| 1993 | 1449365_at   | Region | Edg8                               | 94226  | 9    | 21129182  | 21132474  | -    |
| 1994 | 1437008_x_at | Region | 1110006I15Rik<br>Morf4I2 ///       | 68539  | 19   | 10067157  | 10078240  | -    |
| 1995 | 1439432_x_at | Region | LOC433261                          | 433261 | 19   | 584       | 2363      | -    |
| 1996 | 1415967_at   | Region | Ndufv1                             | 17995  | 19   | 3796295   | 3801515   | -    |
| 1997 | 1452968_at   | Region | Cthrc1                             | 68588  | 15   | 38976511  | 38986747  | +    |
| 1998 | 1423911_at   | Region | Ppp2r5a                            | 226849 | 1    | 191088246 | 191133306 | -    |
| 1999 | 1435621_at   | Region | Mlst1                              | 330450 | 6    | 149072613 | 149116582 | +    |
| 2000 | 1436458_at   | Region | Sema6a                             | 20358  | 18   | 47470645  | 47528251  | -    |
| 2001 | 1435532_at   | Region | 4933426K21Rik                      | 108653 | 6    | 123118089 | 123137380 | -    |
| 2002 | 1450905_at   | Region | Plxnc1                             | 54712  | 10   | 94767461  | 94918749  | -    |
| 2003 | 1447946_at   | Region | AW046396                           | 329173 | 1    | 63888364  | 63889295  | +    |
| 2004 | 1440801_s_at | Region | Adrbk2                             | 320129 | 5    | 111987619 | 112085665 | -    |
| 2005 | 1418838_at   | Region | Abcd1                              | 11666  | X    | 68377252  | 68398942  | +    |
| 2006 | 1415918_a_at | Region | Tpi1                               | 21991  | 6    | 125467483 | 125471180 | -    |
| 2007 | 1427975_at   | Region | 2210403B10Rik                      | 75668  | 11   | 4952915   | 4955163   | +    |
| 2008 | 1437371_at   | Region | 9930021J17Rik                      | 229488 | 3    | 85403171  | 85465611  | -    |
| 2009 | 1429898_at   | Region | 2310008M10Rik<br>A130040M12Rik /// | 66357  | 3    | 129626476 | 129640041 | -    |
| 2010 | 1435137_s_at | Region | E430024C06Rik                      | 319269 | NONE | NONE      | NONE      | NONE |
| 2011 | 1447624_s_at | Region | Stox2                              | 71069  | 8    | 46138301  | 46167033  | -    |
| 2012 | 1454919_at   | Region | AU044698                           | 99235  | 2    | 3244770   | 3246144   | +    |
| 2013 | 1436463_at   | Region | None                               | None   | 18   | 43745458  | 43746296  | -    |
| 2014 | 1424085_at   | Region | Ndufa4                             | 17992  | 6    | 11884041  | 11891115  | -    |
| 2015 | 1435235_at   | Region | Txn1l                              | 53382  | 18   | 63894960  | 63924518  | -    |
| 2016 | 1456197_x_at | Region | None                               | None   | NONE | NONE      | NONE      | NONE |
| 2017 | 1416372_at   | Region | Ptdss1                             | 19210  | 13   | 63535264  | 63600822  | +    |
| 2018 | 1441363_at   | Region | None                               | None   | X    | 133975739 | 133980407 | +    |
| 2019 | 1440407_at   | Region | None                               | None   | 5    | 107443079 | 107443898 | -    |
| 2020 | 1450928_at   | Region | Id4                                | 15904  | 13   | 47859485  | 47862094  | +    |
| 2021 | 1441416_at   | Region | Inpp4b                             | 234515 | 8    | 81357380  | 81358130  | +    |
| 2022 | 1433506_at   | Region | Lrrc5                              | 231549 | 5    | 104762811 | 104877194 | +    |
| 2023 | 1428373_at   | Region | 1500005N04Rik                      | 76500  | 9    | 108842504 | 108852864 | +    |
| 2024 | 1428854_at   | Region | Tmed8                              | 382620 | 12   | 84048716  | 84080007  | -    |
| 2025 | 1439506_at   | Region | Gm98 /// Gm1804                    | 225908 | 19   | 9406882   | 9439836   | -    |
| 2026 | 1416404_s_at | Region | Rps16                              | 20055  | 7    | 23752643  | 23754589  | +    |
| 2027 | 1418050_at   | Region | Gpld1                              | 14756  | 13   | 24423092  | 24470632  | +    |
| 2028 | 1418744_s_at | Region | MGI:1930803                        | 57816  | 5    | 117156470 | 117190516 | +    |
| 2029 | 1433666_s_at | Region | Vps41                              | 218035 | 13   | 18192301  | 18341778  | +    |
| 2030 | 1428580_at   | Region | Blvra                              | 109778 | 2    | 126584520 | 126610937 | +    |
| 2031 | 1423225_at   | Region | MGI:1931466                        | 80795  | 14   | 28102242  | 28108810  | +    |
| 2032 | 1416857_at   | Region | Sdf2                               | 20316  | 11   | 77971405  | 77981145  | +    |
| 2033 | 1429473_at   | Region | 1200003I07Rik                      | 66869  | 8    | 68854689  | 68867301  | -    |
| 2034 | 1428553_at   | Region | 2900070E19Rik                      | 73046  | 12   | 100476825 | 100485046 | +    |
| 2035 | 1425972_a_at | Region | Zfx                                | 22764  | X    | 88735290  | 88783558  | -    |
| 2036 | 1435730_at   | Region | None                               | None   | 6    | 119019827 | 119020304 | -    |
| 2037 | 1426887_at   | Region | Nudt11                             | 58242  | X    | 4357660   | 4364650   | +    |
| 2038 | 1424220_a_at | Region | Porcn                              | 53627  | X    | 6432790   | 6445447   | -    |



|      |              |        |               |        |    |           |           |   |
|------|--------------|--------|---------------|--------|----|-----------|-----------|---|
| 2039 | 1428804_at   | Region | Mfap3l        | 71306  | 8  | 59692537  | 59709342  | + |
| 2040 | 1435978_at   | Region | Gmppa         | 69080  | 1  | 75726707  | 75733896  | + |
| 2041 | 1449335_at   | Region | Timp3         | 21859  | 10 | 86261055  | 86310024  | + |
| 2042 | 1416007_at   | Region | Satb1         | 20230  | 17 | 49274277  | 49367498  | - |
| 2043 | 1437993_x_at | Region | Qdpr          | 110391 | 5  | 44192821  | 44208924  | - |
| 2044 | 1436031_at   | Region | B430218L07Rik | 320508 | 4  | 99735584  | 99962654  | + |
| 2045 | 1434369_a_at | Region | Cryab         | 12955  | 9  | 50825084  | 50828959  | + |
| 2046 | 1418683_at   | Region | Lin7b         | 22342  | 7  | 39443916  | 39446815  | - |
| 2047 | 1437218_at   | Region | Fn1           | 14268  | 1  | 71881640  | 71949288  | - |
| 2048 | 1421929_at   | Region | Epha4         | 13838  | 1  | 77656420  | 77802175  | - |
| 2049 | 1436821_at   | Region | Plcx3         | 239318 | 15 | 4158026   | 4302949   | + |
| 2050 | 1423176_at   | Region | Tob1          | 22057  | 11 | 94034727  | 94035815  | + |
| 2051 | 1434500_at   | Region | Ttyh2         | 117160 | 11 | 114496618 | 114540296 | + |
| 2052 | 1421140_a_at | Region | Foxp1         | 108655 | 6  | 99395348  | 99630926  | - |
| 2053 | 1452595_at   | Region | Adamts4       | 240913 | 1  | 171179261 | 171188761 | + |
| 2054 | 1448354_at   | Region | G6pdx         | 14381  | X  | 69070141  | 69089816  | - |
| 2055 | 1419250_a_at | Region | Pftk1         | 18647  | 5  | 4809738   | 5386208   | - |
| 2056 | 1419444_at   | Region | Sap18         | 20220  | 14 | 52333126  | 52339849  | + |
| 2057 | 1423995_at   | Region | Kif1b         | 16561  | 4  | 147668683 | 147799980 | - |
| 2058 | 1417927_at   | Region | Ddx19a        | 13680  | 8  | 110272730 | 110295521 | - |
| 2059 | 1434898_at   | Region | Tnrc6a        | 233833 | 7  | 117180427 | 117250357 | + |
| 2060 | 1424827_a_at | Region | Csnk1a1       | 93687  | 18 | 61784394  | 61817111  | + |
| 2061 | 1455584_at   | Region | Sdf4          | 20318  | 4  | 154485276 | 154505972 | + |
| 2062 | 1457139_at   | Region | Auts2         | 319974 | 5  | 130627794 | 130728707 | - |
| 2063 | 1441081_a_at | Region | 1110038B12Rik | 68763  | 17 | 32654022  | 32656311  | - |
| 2064 | 1435762_at   | Region | Pacs1         | 107975 | 19 | 4922475   | 5061909   | - |
| 2065 | 1419287_at   | Region | MGI:1913570   | 66320  | 8  | 104622006 | 104624683 | + |
| 2066 | 1424471_at   | Region | Rapgef3       | 223864 | 15 | 97820598  | 97843317  | - |
| 2067 | 1449377_at   | Region | Nicn1         | 66257  | 9  | 108360217 | 108366256 | + |
| 2068 | 1415973_at   | Region | Marcks        | 17118  | 10 | 37207003  | 37211096  | - |
| 2069 | 1438044_at   | Region | 1700047M11Rik | 67330  | 1  | 182260714 | 182261447 | + |
| 2070 | 1426667_a_at | Region | Unc84a        | 77053  | 5  | 138213212 | 138247853 | + |
| 2071 | 1457404_at   | Region | Nfkbiz        | 80859  | 16 | 54703494  | 54731495  | - |
| 2072 | 1431209_s_at | Region | Tmem42        | 66079  | 9  | 123039099 | 123041256 | + |
| 2073 | 1450065_at   | Region | Adcy7         | 11513  | 8  | 87557754  | 87614390  | + |
| 2074 | 1426432_a_at | Region | Slc4a4        | 54403  | 5  | 88232301  | 88532904  | + |
| 2075 | 1428252_at   | Region | Chmp2b        | 68942  | 16 | 64543222  | 64566897  | - |
| 2076 | 1415799_at   | Region | Wbp11         | 60321  | 6  | 137585452 | 137599924 | - |
| 2077 | 1428687_at   | Region | Zfp687        | 78266  | 3  | 94494533  | 94503069  | - |
| 2078 | 1452663_at   | Region | 1110030H18Rik | 68666  | 5  | 113137557 | 113202215 | - |
| 2079 | 1433690_at   | Region | 2210016L21Rik | 72357  | 5  | 114051828 | 114058166 | + |
| 2080 | 1437295_at   | Region | Pkn2          | 109333 | 3  | 141762433 | 141850964 | - |
| 2081 | 1431367_at   | Region | 38412         | 72925  | 8  | 65495563  | 65579550  | + |
| 2082 | 1448462_at   | Region | Tdg           | 21665  | 10 | 82517850  | 82538768  | + |
| 2083 | 1460595_at   | Region | None          | None   | 1  | 192629997 | 192630801 | - |
| 2084 | 1428664_at   | Region | Vip           | 22353  | 10 | 4863942   | 4872338   | - |
| 2085 | 1434787_at   | Region | Al854770      | 105930 | 15 | 98793835  | 98794862  | - |
| 2086 | 1428506_at   | Region | Atic          | 108147 | 1  | 71853291  | 71875521  | + |
| 2087 | 1429254_at   | Region | Aqp11         | 66333  | 7  | 91772650  | 91784518  | - |
| 2088 | 1438961_s_at | Region | Blmh          | 104184 | 11 | 76671417  | 76713035  | + |
| 2089 | 1440484_at   | Region | Unc5d         | 210801 | 8  | 27430583  | 27997671  | - |
| 2090 | 1426934_at   | Region | Nhsl1         | 215819 | 10 | 18451363  | 18458365  | + |
| 2091 | 1420403_at   | Region | Atp2b2        | 11941  | 6  | 114316878 | 114489190 | - |
| 2092 | 1459327_at   | Region | 4931406I20Rik | 66743  | 4  | 116230369 | 116455820 | - |
| 2093 | 1455245_x_at | Region | Rpl13         | 270106 | 8  | 122483697 | 122486521 | + |
| 2094 | 1435551_at   | Region | FHOS2         | 225288 | 18 | 24937941  | 25361997  | + |
| 2095 | 1426541_a_at | Region | 2310067E08Rik | 71946  | 9  | 14189509  | 14216547  | - |
| 2096 | 1460287_at   | Region | Timp2         | 21858  | 11 | 118122157 | 118176401 | - |
| 2097 | 1426338_a_at | Region | Ntng1         | 80883  | 3  | 109582822 | 109951623 | - |
| 2098 | 1452579_at   | Region | Nifun         | 66383  | 5  | 112883532 | 112889002 | + |
| 2099 | 1427914_a_at | Region | Tceb1         | 67923  | 1  | 16827250  | 16842139  | - |
| 2100 | 1436789_at   | Region | Gm877         | 380694 | 11 | 43281564  | 43346257  | + |
| 2101 | 1435444_at   | Region | Atf6          | 226641 | 1  | 170641954 | 170802508 | - |
| 2102 | 1422103_a_at | Region | Stat5b        | 20851  | 11 | 100601818 | 100643615 | - |
| 2103 | 1442823_at   | Region | None          | None   | 7  | 138836969 | 138837906 | + |

|      |              |        |               |        |    |           |           |   |
|------|--------------|--------|---------------|--------|----|-----------|-----------|---|
| 2104 | 1422619_at   | Region | Ppap2a        | 19012  | 13 | 109194243 | 109262166 | + |
| 2105 | 1416472_at   | Region | Syap1         | 67043  | X  | 156456257 | 156487836 | - |
| 2106 | 1455592_at   | Region | Ltap          | 93840  | 1  | 171933290 | 171956187 | - |
| 2107 | 1421127_at   | Region | Tmem42        | 66079  | 9  | 123039099 | 123041256 | + |
| 2108 | 1421471_at   | Region | Npy1r         | 18166  | 8  | 65812971  | 65815231  | + |
| 2109 | 1452666_a_at | Region | Tmcc2         | 68875  | 1  | 132213622 | 132248587 | - |
| 2110 | 1430288_x_at | Region | Rps21         | 66481  | 2  | 179974367 | 179975394 | + |
| 2111 | 1415906_at   | Region | Tmsb4x        | 19241  | X  | 160806500 | 160808554 | - |
| 2112 | 1446537_at   | Region | Kcnq5         | 226922 | 1  | 22071665  | 22072317  | - |
| 2113 | 1416054_at   | Region | Rps5          | 20103  | 7  | 10916008  | 10931517  | + |
| 2114 | 1428372_at   | Region | St5           | 76954  | 7  | 103376782 | 103470018 | - |
| 2115 | 1416768_at   | Region | 1110003E01Rik | 68552  | 5  | 64251633  | 64294659  | - |
| 2116 | 1428866_at   | Region | 2810037O22Rik | 72711  | 14 | 54920971  | 54923068  | + |
| 2117 | 1430124_x_at | Region | Akr1a4        | 58810  | 4  | 115595415 | 115610556 | - |
| 2118 | 1423690_s_at | Region | Gpsm1         | 67839  | 2  | 26247702  | 26280397  | + |
| 2119 | 1415878_at   | Region | Rrm1          | 20133  | 7  | 96546225  | 96573284  | + |
| 2120 | 1458364_s_at | Region | MGI:1929890   | 64164  | 1  | 155937531 | 155950350 | + |
| 2121 | 1455779_at   | Region | B430315C20Rik | 327655 | 2  | 120824412 | 120864866 | - |
| 2122 | 1435448_at   | Region | Bcl2l11       | 12125  | 2  | 127639891 | 127676025 | + |
| 2123 | 1439374_x_at | Region | None          | None   | 6  | 13448387  | 13448604  | - |
| 2124 | 1430068_at   | Region | C030011L09Rik | 77316  | 2  | 106949448 | 106950583 | + |
| 2125 | 1424313_a_at | Region | Ndufs7        | 75406  | 10 | 80374361  | 80381701  | + |
| 2126 | 1423512_at   | Region | AW209491      | 105351 | 13 | 14074830  | 14083649  | + |
| 2127 | 1416240_at   | Region | Psmb7         | 19177  | 2  | 38520208  | 38576068  | - |
| 2128 | 1428228_at   | Region | Pgm3          | 109785 | 9  | 86894706  | 86914156  | - |
| 2129 | 1428605_at   | Region | 1810023B24Rik | 234388 | 8  | 70023940  | 70029203  | - |
| 2130 | 1455294_at   | Region | 1110029L17Rik | 68722  | 15 | 1072670   | 1073472   | + |
| 2131 | 1430348_at   | Region | 2900019E01Rik | 72918  | 15 | 43477349  | 43478773  | + |
| 2132 | 1434943_at   | Region | BC023055      | 226123 | 19 | 41619314  | 41623505  | - |
| 2133 | 1453651_a_at | Region | Brp44l        | 55951  | 17 | 16810     | 30658     | + |
| 2134 | 1455158_at   | Region | Itga3         | 16400  | 11 | 94865569  | 94897801  | - |
| 2135 | 1415753_at   | Region | D10Bwg1364e   | 216169 | 10 | 80715282  | 80721253  | - |
| 2136 | 1418791_at   | Region | Sh3gl2        | 20404  | 4  | 84191648  | 84375572  | + |
| 2137 | 1424434_at   | Region | BC024814      | 239706 | 16 | 8144106   | 8163490   | + |
| 2138 | 1421654_a_at | Region | Lmna          | 16905  | 3  | 88225013  | 88247171  | - |
| 2139 | 1415850_at   | Region | Rasa3         | 19414  | 8  | 12945853  | 13056187  | - |
| 2140 | 1424070_at   | Region | Napg          | 108123 | 18 | 63183763  | 63228262  | + |
| 2141 | 1415909_at   | Region | Stip1         | 20867  | 19 | 6734555   | 6753790   | - |
| 2142 | 1435987_x_at | Region | 1110059G02Rik | 68786  | 15 | 55640894  | 55641284  | - |
| 2143 | 1429599_a_at | Region | 1110019K23Rik | 68621  | 5  | 90247014  | 90341747  | + |
| 2144 | 1434287_at   | Region | Agpat5        | 52123  | 8  | 18791504  | 18829381  | + |
| 2145 | 1425601_a_at | Region | Rtkn          | 20166  | 6  | 83480778  | 83496265  | + |
| 2146 | 1416528_at   | Region | Sh3bgrl3      | 73723  | 4  | 133088305 | 133089652 | - |
| 2147 | 1439148_a_at | Region | Pfkl          | 18641  | 10 | 78096466  | 78119117  | - |
| 2148 | 1445309_at   | Region | None          | None   | 15 | 72536992  | 72537669  | - |
| 2149 | 1450969_at   | Region | Pccb          | 66904  | 9  | 100883585 | 100936422 | - |
| 2150 | 1435436_at   | Region | None          | None   | 17 | 84666021  | 84667534  | + |
| 2151 | 1417830_at   | Region | Smc1l1        | 24061  | X  | 145550823 | 145596362 | + |
| 2152 | 1438889_at   | Region | None          | None   | X  | 115258137 | 115258803 | + |
| 2153 | 1451734_a_at | Region | Dbn1          | 56320  | 13 | 54082915  | 54100289  | - |
| 2154 | 1437631_at   | Region | Kcnip4        | 80334  | 5  | 47153325  | 47273714  | - |
| 2155 | 1453007_at   | Region | 3110082I17Rik | 73212  | 5  | 138357252 | 138458005 | - |
| 2156 | 1421027_a_at | Region | Mef2c         | 17260  | 13 | 79604158  | 79763912  | + |
| 2157 | 1434829_at   | Region | Cbl           | 12402  | 9  | 44140278  | 44222839  | - |
| 2158 | 1419168_at   | Region | Mapk6         | 50772  | 9  | 75524483  | 75535986  | - |
| 2159 | 1416198_at   | Region | Th1l          | 57314  | 2  | 173840711 | 173852404 | + |
| 2160 | 1434224_at   | Region | Tbl2          | 27368  | 5  | 134163203 | 134176154 | + |
| 2161 | 1433743_at   | Region | Dach1         | 13134  | 14 | 92301812  | 92643713  | - |
| 2162 | 1455210_at   | Region | Zhx2          | 387609 | 15 | 57703360  | 57848440  | + |
| 2163 | 1457396_at   | Region | None          | None   | 19 | 58764042  | 58764713  | - |
| 2164 | 1428683_at   | Region | A930016P21Rik | 68073  | 15 | 31602722  | 31618141  | + |
| 2165 | 1425913_a_at | Region | 2810022L02Rik | 67198  | 1  | 58079733  | 58253199  | + |
| 2166 | 1448249_at   | Region | Gpd1          | 14555  | 15 | 99774809  | 99782224  | + |
| 2167 | 1458469_at   | Region | Cblb          | 208650 | 16 | 50949437  | 51125945  | + |
| 2168 | 1424167_a_at | Region | Pmm1          | 29858  | 15 | 82001829  | 82011581  | - |

|      |              |        |               |        |      |           |           |      |
|------|--------------|--------|---------------|--------|------|-----------|-----------|------|
| 2169 | 1434762_at   | Region | A730041O15Rik | 269717 | 5    | 135160956 | 135184148 | -    |
| 2170 | 1416430_at   | Region | Cat           | 12359  | 2    | 103158757 | 103189874 | -    |
| 2171 | 1415879_a_at | Region | Rplp2         | 67186  | 12   | 72487280  | 72488111  | -    |
| 2172 | 1446282_at   | Region | None          | None   | 3    | 73317668  | 73347307  | +    |
| 2173 | 1436332_at   | Region | Hspb6         | 243912 | 7    | 25965994  | 25968131  | +    |
| 2174 | 1423579_a_at | Region | Trpc4         | 22066  | 3    | 53790324  | 53952687  | +    |
| 2175 | 1427307_a_at | Region | Dab1          | 13131  | 4    | 103326495 | 103639279 | +    |
| 2176 | 1423969_at   | Region | Nup37         | 69736  | 10   | 88119487  | 88150839  | +    |
| 2177 | 1420963_at   | Region | Hapln2        | 73940  | 3    | 87765928  | 87771304  | -    |
| 2178 | 1420171_s_at | Region | Myh9          | 17886  | 15   | 77812545  | 77894062  | -    |
| 2179 | 1453819_x_at | Region | Stx18         | 71116  | 5    | 36545458  | 36643042  | +    |
| 2180 | 1424954_a_at | Region | Pip5k1c       | 18717  | 10   | 81429153  | 81451529  | +    |
| 2181 | 1437397_at   | Region | AI987712      | 105935 | 15   | 10144345  | 10149957  | +    |
| 2182 | 1451134_a_at | Region | Tm2d2         | 69742  | 8    | 23740385  | 23746364  | +    |
| 2183 | 1427011_a_at | Region | Lancl1        | 14768  | 1    | 67292813  | 67331161  | -    |
| 2184 | 1433950_at   | Region | BC055811      | 230868 | 4    | 138908113 | 139128045 | -    |
| 2185 | 1443344_at   | Region | 4932409I22Rik | 237397 | 10   | 79727857  | 79735002  | -    |
| 2186 | 1424765_at   | Region | Eps15-rs      | 13859  | 8    | 71489790  | 71569758  | -    |
| 2187 | 1434451_at   | Region | 2900016G23Rik | 78659  | 13   | 45124518  | 45126925  | -    |
| 2188 | 1427121_at   | Region | Fbxo4         | 106052 | 15   | 3747996   | 3762108   | -    |
| 2189 | 1418784_at   | Region | Grik5         | 14809  | 7    | 20188743  | 20247333  | -    |
| 2190 | 1455278_at   | Region | Wdr37         | 207615 | 13   | 8762169   | 8828183   | -    |
| 2191 | 1434141_at   | Region | Gucy1a3       | 60596  | 3    | 81821497  | 81874847  | -    |
| 2192 | 1417086_at   | Region | Pafah1b1      | 18472  | 11   | 74399613  | 74450328  | -    |
| 2193 | 1426794_at   | Region | Ptprs         | 19280  | 17   | 54049473  | 54095417  | -    |
| 2194 | 1429382_at   | Region | Nr1i3         | 12355  | 1    | 171142875 | 171147683 | +    |
| 2195 | 1449712_s_at | Region | Atp6v1e1      | 11973  | 6    | 121227218 | 121254659 | -    |
| 2196 | 1446157_at   | Region | A330019N05Rik | 215890 | 10   | 33567437  | 33679703  | -    |
| 2197 | 1418518_at   | Region | Furin         | 18550  | 7    | 74191895  | 74205461  | -    |
| 2198 | 1437628_s_at | Region | Rhoa          | 11848  | 9    | 108375966 | 108407597 | +    |
| 2199 | 1424886_at   | Region | Ptprd         | 19266  | 4    | 75005727  | 75195151  | -    |
| 2200 | 1419544_at   | Region | Atp6v1c1      | 66335  | 15   | 38667202  | 38697131  | +    |
| 2201 | 1418706_at   | Region | Slc38a3       | 76257  | 9    | 107716936 | 107733151 | -    |
| 2202 | 1436465_at   | Region | Klhl1         | 93688  | 14   | 90574765  | 90989240  | -    |
| 2203 | 1455522_at   | Region | Arhgef15      | 442801 | 11   | 68673890  | 68677832  | -    |
| 2204 | 1435743_at   | Region | Klhl23        | 277396 | 2    | 69677873  | 69692048  | +    |
| 2205 | 1454996_at   | Region | Hsdl1         | 72552  | 8    | 118904427 | 118917664 | -    |
| 2206 | 1423548_s_at | Region | Sdbcag84      | 66366  | 2    | 155465054 | 155475216 | +    |
| 2207 | 1427386_at   | Region | Arhgef16      | 230972 | 4    | 152770891 | 152794038 | -    |
| 2208 | 1419372_at   | Region | Gosr2         | 56494  | 11   | 103497948 | 103518783 | -    |
| 2209 | 1415855_at   | Region | Kitl          | 17311  | 10   | 99997658  | 100082002 | +    |
| 2210 | 1433954_at   | Region | 4632419I22Rik | 74038  | NONE | NONE      | NONE      | NONE |
| 2211 | 1431659_at   | Region | C330014O21Rik | 68255  | NONE | NONE      | NONE      | NONE |
| 2212 | 1457935_at   | Region | Sdccag33l     | 228911 | 2    | 169281479 | 169281898 | +    |
| 2213 | 1425229_a_at | Region | Tcf7l2        | 21416  | 19   | 55323190  | 55515901  | +    |
| 2214 | 1455429_at   | Region | AI450540      | 226252 | 19   | 56946405  | 56975311  | +    |
| 2215 | 1435537_at   | Region | Ptprd         | 19266  | 4    | 75004276  | 75073340  | -    |
| 2216 | 1456838_at   | Region | LOC237403     | 237403 | 10   | 80964861  | 80976092  | -    |
| 2217 | 1438943_x_at | Region | Rpn1          | 103963 | 6    | 88518156  | 88540499  | +    |
| 2218 | 1417354_at   | Region | Sil1          | 81500  | 18   | 35490054  | 35722531  | -    |
| 2219 | 1434018_at   | Region | BC043098      | 214469 | 1    | 35082568  | 35112316  | -    |
| 2220 | 1448769_at   | Region | Slc35b1       | 110172 | 11   | 95206009  | 95212739  | +    |
| 2221 | 1459903_at   | Region | Sema7a        | 20361  | 9    | 58054059  | 58076850  | +    |
| 2222 | 1434555_at   | Region | Anp32a        | 11737  | 9    | 62461464  | 62498838  | +    |
| 2223 | 1454758_a_at | Region | Tgfb1i4       | 21807  | 14   | 70758316  | 70850256  | +    |
| 2224 | 1416087_at   | Region | Ap1s1         | 11769  | 5    | 136048116 | 136059182 | -    |
| 2225 | 1443170_at   | Region | None          | None   | 19   | 43040899  | 43041517  | +    |
| 2226 | 1419286_s_at | Region | Cdv1          | 12589  | 5    | 121702852 | 121766929 | -    |
| 2227 | 1421917_at   | Region | Pdgfra        | 18595  | 5    | 73986573  | 74032425  | +    |
| 2228 | 1428529_at   | Region | 2810026P18Rik | 72655  | 9    | 88882596  | 88884174  | -    |
| 2229 | 1457899_at   | Region | Kalrn         | 224126 | 16   | 32818840  | 32825621  | -    |
| 2230 | 1457198_at   | Region | Nrp1          | 18186  | 8    | 127666747 | 127814326 | +    |
| 2231 | 1422549_at   | Region | Arl2          | 56327  | 19   | 5923179   | 5929927   | -    |
| 2232 | 1452742_at   | Region | 2310001H13Rik | 67095  | 9    | 121314022 | 121472320 | +    |
| 2233 | 1450053_at   | Region | Kif2a         | 16563  | 13   | 103169548 | 103230223 | -    |

|      |              |        |                   |        |      |           |           |      |
|------|--------------|--------|-------------------|--------|------|-----------|-----------|------|
| 2234 | 1416843_at   | Region | Pde6d             | 18582  | 1    | 86348646  | 86388343  | -    |
| 2235 | 1416374_at   | Region | Ap3m1             | 55946  | 14   | 19399475  | 19416850  | -    |
| 2236 | 1448289_at   | Region | Crmp1             | 12933  | 5    | 35752304  | 35798645  | +    |
| 2237 | 1435873_a_at | Region | Rpl13a /// Zfp526 | 210172 | 7    | 20401813  | 20408380  | +    |
| 2238 | 1454742_at   | Region | Rasgef1b          | 320292 | 5    | 98235569  | 98270997  | -    |
| 2239 | 1420477_at   | Region | Nap1l1            | 53605  | 10   | 111105541 | 111122931 | +    |
| 2240 | 1420938_at   | Region | Hs6st2            | 50786  | X    | 45909852  | 46201195  | -    |
| 2241 | 1433501_at   | Region | Ctso              | 229445 | 3    | 81661676  | 81685785  | +    |
| 2242 | 1448219_a_at | Region | Ywhaz             | 22631  | 15   | 36773662  | 36797651  | -    |
| 2243 | 1437968_at   | Region | Grin1             | 14810  | 2    | 25224409  | 25251141  | -    |
| 2244 | 1437866_at   | Region | Dusp18            | 75219  | 11   | 3790068   | 3796083   | +    |
| 2245 | 1437724_x_at | Region | Pitpnm1           | 18739  | 19   | 3889412   | 3902751   | +    |
| 2246 | 1436862_at   | Region | Doc2a             | 13446  | 7    | 120897284 | 120902436 | +    |
| 2247 | 1415788_at   | Region | BC002236          | 79560  | 11   | 44207410  | 44223282  | -    |
| 2248 | 1451507_at   | Region | Mef2c             | 17260  | 13   | 79604158  | 79763912  | +    |
| 2249 | 1418375_at   | Region | D10Wsu93e         | 110962 | 10   | 127018595 | 127020280 | -    |
| 2250 | 1452264_at   | Region | Tenc1             | 209039 | 15   | 102161590 | 102175759 | +    |
| 2251 | 1415793_at   | Region | Pnpo              | 103711 | 11   | 96758914  | 96765030  | -    |
| 2252 | 1456856_at   | Region | Ppfia2            | 327814 | 10   | 106357920 | 106820120 | +    |
| 2253 | 1423853_at   | Region | 6330527O06Rik     | 76161  | 2    | 135572081 | 135583763 | +    |
| 2254 | 1439622_at   | Region | Rassf4            | 213391 | 6    | 117070312 | 117109861 | -    |
| 2255 | 1457281_at   | Region | 4930461P20Rik     | 78244  | 15   | 10260892  | 10284727  | -    |
| 2256 | 1418743_a_at | Region | MGI:1930803       | 57816  | 5    | 117156470 | 117190516 | +    |
| 2257 | 1435404_at   | Region | Disp2             | 214240 | 2    | 118293767 | 118309024 | +    |
| 2258 | 1417946_at   | Region | Abhd3             | 106861 | 18   | 10689755  | 10752040  | -    |
| 2259 | 1434532_at   | Region | BC035295          | 207785 | 15   | 100537108 | 100552777 | -    |
| 2260 | 1428095_a_at | Region | Tmem24            | 71764  | 9    | 44299070  | 44309001  | -    |
| 2261 | 1415824_at   | Region | Scd2              | 20250  | 19   | 43838494  | 43851266  | +    |
| 2262 | 1433884_at   | Region | Syt1              | 20979  | 10   | 108385089 | 108577499 | -    |
| 2263 | 1426759_at   | Region | Map4k3            | 225028 | 17   | 78411242  | 78558951  | -    |
| 2264 | 1436326_at   | Region | Rora              | 19883  | 9    | 69474948  | 69510983  | +    |
| 2265 | 1436263_at   | Region | Mobp              | 17433  | 9    | 120159695 | 120186044 | +    |
| 2266 | 1446286_at   | Region | Kirrel3           | 67703  | 9    | 34554549  | 34555109  | +    |
| 2267 | 1448312_at   | Region | Pcsk2             | 18549  | 2    | 143003115 | 143273220 | +    |
| 2268 | 1456497_x_at | Region | Rps10             | 67097  | 17   | 25426347  | 25431160  | -    |
| 2269 | 1434779_at   | Region | Cbln2             | 12405  | 18   | 86883230  | 86888465  | +    |
| 2270 | 1435437_at   | Region | MGI:1920501       | 73251  | 3    | 51152457  | 51192611  | -    |
| 2271 | 1455659_at   | Region | Tmcc1             | 330401 | 6    | 116456153 | 116631023 | -    |
| 2272 | 1422052_at   | Region | Cdh8              | 12564  | 8    | 98317068  | 98691929  | -    |
| 2273 | 1426756_at   | Region | Galnt2            | 108148 | 8    | 123518466 | 123632794 | +    |
| 2274 | 1421571_a_at | Region | Ly6c              | 17067  | 15   | 75077718  | 75081535  | -    |
| 2275 | 1455409_at   | Region | Spire1            | 68166  | 18   | 67718995  | 67783507  | -    |
| 2276 | 1440551_at   | Region | Dnajc1            | 13418  | 2    | 18259145  | 18434517  | -    |
| 2277 | 1435781_at   | Region | Cand1             | 71902  | 10   | 118778384 | 118938138 | -    |
| 2278 | 1417986_at   | Region | Nrarp             | 67122  | 2    | 25113185  | 25115487  | +    |
| 2279 | 1449929_at   | Region | Tcte1l            | 67117  | X    | 7893210   | 7901923   | -    |
| 2280 | 1428578_s_at | Region | Ppfia4            | 68507  | 1    | 134149042 | 134182786 | -    |
| 2281 | 1416608_a_at | Region | BC004004          | 80748  | 17   | 27090378  | 27115403  | +    |
| 2282 | 1418982_at   | Region | Cebpa             | 12606  | 7    | 30276207  | 30277487  | +    |
| 2283 | 1419364_a_at | Region | Rps7              | 20115  | 12   | 25196338  | 25201165  | -    |
| 2284 | 1438027_at   | Region | None              | None   | NONE | NONE      | NONE      | NONE |
| 2285 | 1432417_a_at | Region | Tspan2            | 70747  | 3    | 102162658 | 102198922 | +    |
| 2286 | 1448883_at   | Region | Lgmn              | 19141  | 12   | 97839582  | 97885181  | -    |
| 2287 | 1440210_at   | Region | Cacng2            | 12300  | 15   | 78046913  | 78171273  | -    |
| 2288 | 1423283_at   | Region | Pitpna            | 18738  | 11   | 75313766  | 75354436  | +    |
| 2289 | 1458134_at   | Region | None              | None   | NONE | NONE      | NONE      | NONE |
| 2290 | 1456663_x_at | Region | Tm2d2             | 69742  | 8    | 23740385  | 23746364  | +    |
| 2291 | 1429262_at   | Region | Rassf6            | 73246  | 5    | 89900673  | 89938050  | -    |
| 2292 | 1425781_a_at | Region | Plcb1             | 18795  | 2    | 134734571 | 134986275 | +    |
| 2293 | 1451224_at   | Region | Scamp5            | 56807  | 9    | 57554973  | 57581670  | -    |
| 2294 | 1439968_x_at | Region | None              | None   | 2    | 163948096 | 163950053 | +    |
| 2295 | 1455376_at   | Region | 1300010F03Rik     | 219189 | 14   | 73122033  | 73556355  | +    |
| 2296 | 1426790_at   | Region | Ssrp1             | 20833  | 2    | 84735021  | 84744858  | +    |
| 2297 | 1423610_at   | Region | Metap2            | 56307  | 10   | 93834268  | 93863130  | -    |
| 2298 | 1451008_at   | Region | St8sia3           | 20451  | 18   | 64496670  | 64507426  | +    |

|      |              |        |                  |        |    |           |           |   |
|------|--------------|--------|------------------|--------|----|-----------|-----------|---|
| 2299 | 1454768_at   | Region | Kcnf1            | 382571 | 12 | 16538786  | 16543211  | - |
| 2300 | 1452765_at   | Region | Slc39a9          | 328133 | 12 | 77505138  | 77544592  | + |
| 2301 | 1417053_at   | Region | Phb              | 18673  | 11 | 95488102  | 95501852  | + |
| 2302 | 1417043_at   | Region | Lcat             | 16816  | 8  | 105235399 | 105239229 | - |
| 2303 | 1423275_at   | Region | Ddx26            | 18130  | 14 | 57209161  | 57294009  | - |
| 2304 | 1435745_at   | Region | 5031439G07Rik    | 223739 | 15 | 84997544  | 85036545  | - |
| 2305 | 1423151_at   | Region | Dnajb11          | 67838  | 16 | 21641386  | 21655847  | + |
| 2306 | 1416407_at   | Region | Pea15            | 18611  | 1  | 172081687 | 172129498 | - |
| 2307 | 1431065_at   | Region | Eaf1             | 74427  | 14 | 29627014  | 29641729  | + |
| 2308 | 1450648_s_at | Region | H2-Ab1 /// Rmcs1 | 114887 | 17 | 31964476  | 31970586  | + |
| 2309 | 1460043_at   | Region | None             | None   | 15 | 89829889  | 89830574  | - |
| 2310 | 1431055_a_at | Region | Snx10            | 71982  | 6  | 51687522  | 51734165  | + |
| 2311 | 1416606_s_at | Region | Nola2            | 52530  | 11 | 51372614  | 51376555  | + |
| 2312 | 1448201_at   | Region | Sfrp2            | 20319  | 3  | 83502189  | 83510183  | + |
| 2313 | 1460695_a_at | Region | 2010111I01Rik    | 72061  | 13 | 60400470  | 60681842  | + |
| 2314 | 1417677_at   | Region | Opn3             | 13603  | 1  | 175595136 | 175625299 | - |
| 2315 | 1452196_a_at | Region | Nckap1           | 50884  | 2  | 80199044  | 80278714  | - |
| 2316 | 1455023_at   | Region | N28178           | 230085 | 4  | 42833173  | 42857529  | + |
| 2317 | 1460632_at   | Region | Rdh10            | 98711  | 1  | 16289336  | 16316005  | + |
| 2318 | 1436697_at   | Region | Dscr3            | 13185  | 16 | 93894798  | 93923338  | - |
| 2319 | 1416155_at   | Region | Hmgb3            | 15354  | X  | 66224484  | 66229145  | + |
| 2320 | 1434846_at   | Region | 1700065A05Rik    | 329877 | 4  | 85760447  | 85836008  | + |
| 2321 | 1418690_at   | Region | Ptprz1           | 19283  | 6  | 22927206  | 23056382  | + |
| 2322 | 1424718_at   | Region | Mapt             | 17762  | 11 | 104052587 | 104149347 | + |
| 2323 | 1454619_at   | Region | AI451006         | 105847 | 15 | 89403881  | 89408357  | - |
| 2324 | 1417885_at   | Region | Mapt             | 17762  | 11 | 104052587 | 104149347 | + |
| 2325 | 1418237_s_at | Region | Col18a1          | 12822  | 10 | 77153138  | 77270740  | - |
| 2326 | 1456375_x_at | Region | Trim27           | 19720  | 13 | 20660436  | 20672921  | + |
| 2327 | 1423290_at   | Region | Hyou1            | 12282  | 9  | 44368440  | 44381225  | + |
| 2328 | 1452206_at   | Region | Sucla2           | 20916  | 14 | 67904221  | 67947577  | + |
| 2329 | 1456090_at   | Region | Pdhx             | 27402  | 2  | 102725831 | 102778265 | - |
| 2330 | 1428570_at   | Region | Ccnc             | 51813  | 4  | 21797101  | 21819917  | + |
| 2331 | 1460451_at   | Region | Tmem52           | 69671  | 4  | 153961476 | 153963219 | + |
| 2332 | 1426548_a_at | Region | 5730421E18Rik    | 66632  | 2  | 114030258 | 114168768 | - |
| 2333 | 1439068_at   | Region | MGI:1933403      | 80898  | 13 | 70696832  | 70749086  | + |
| 2334 | 1452130_at   | Region | 2310042M24Rik    | 66958  | 2  | 84369066  | 84375796  | - |
| 2335 | 1432416_a_at | Region | Npm1             | 18148  | 11 | 33047305  | 33057850  | - |
| 2336 | 1437545_at   | Region | Rcor1            | 217864 | 12 | 106514818 | 106586780 | + |
| 2337 | 1420631_a_at | Region | Bicap            | 53619  | 2  | 157013332 | 157023330 | - |
| 2338 | 1460689_at   | Region | D15Wsu75e        | 28075  | 15 | 82043240  | 82066857  | - |
| 2339 | 1460385_a_at | Region | Zfp179           | 22671  | 11 | 61174084  | 61179528  | - |
| 2340 | 1420901_a_at | Region | Hk1              | 15275  | 10 | 62236465  | 62346218  | - |
| 2341 | 1428142_at   | Region | Etv5             | 104156 | 16 | 21153380  | 21211575  | - |
| 2342 | 1459913_at   | Region | Tnfsf10          | 22035  | 3  | 26734898  | 26753894  | + |
| 2343 | 1427411_s_at | Region | Dleu2            | 328425 | 14 | 56136336  | 56215549  | - |
| 2344 | 1451289_at   | Region | Dcamk1l          | 13175  | 3  | 54876964  | 55171014  | + |
| 2345 | 1451216_at   | Region | Zfp330           | 30932  | 8  | 82004797  | 82015303  | - |
| 2346 | 1425025_at   | Region | 0610008L10Rik    | 217203 | 11 | 101403405 | 101412000 | + |
| 2347 | 1420337_at   | Region | Gbx2             | 14472  | 1  | 89746512  | 89749726  | - |
| 2348 | 1422567_at   | Region | Niban            | 63913  | 1  | 151492935 | 151576687 | + |
| 2349 | 1426823_s_at | Region | Psme4            | 103554 | 11 | 30666852  | 30774524  | + |
| 2350 | 1445539_at   | Region | Pde7b            | 29863  | 10 | 20324950  | 20654021  | - |
| 2351 | 1425760_a_at | Region | Pitpnm1          | 18739  | 19 | 3889412   | 3902751   | + |
| 2352 | 1433510_x_at | Region | Rpl36            | 54217  | 17 | 54301885  | 54302698  | + |
| 2353 | 1446921_at   | Region | None             | None   | 11 | 11896001  | 11896574  | - |
| 2354 | 1424842_a_at | Region | Arhgap24         | 231532 | 5  | 101508673 | 101932043 | + |
| 2355 | 1429269_at   | Region | LOC73072         | 73072  | 8  | 3564501   | 3572270   | - |
| 2356 | 1426212_s_at | Region | BC021367         | 234371 | 8  | 69325384  | 69336638  | + |
| 2357 | 1433793_s_at | Region | Nrip2            | 60345  | 6  | 129089953 | 129098438 | + |
| 2358 | 1446612_at   | Region | 9330118A15Rik    | 319756 | 4  | 25146480  | 25147122  | + |
| 2359 | 1421166_at   | Region | Atrn             | 11990  | 2  | 130420349 | 130541594 | + |
| 2360 | 1429592_at   | Region | Lhfpl3           | 269629 | 5  | 21183622  | 21739491  | + |
| 2361 | 1434932_at   | Region | Adarb1           | 110532 | 10 | 77405789  | 77470808  | - |
| 2362 | 1423033_at   | Region | Itm1             | 16430  | 9  | 36668263  | 36704803  | - |
| 2363 | 1433648_at   | Region | Spag9            | 70834  | 11 | 93817190  | 93944505  | + |

|      |              |        |                    |        |    |           |           |   |
|------|--------------|--------|--------------------|--------|----|-----------|-----------|---|
| 2364 | 1448751_at   | Region | Ap3m2              | 64933  | 8  | 21541934  | 21560210  | - |
| 2365 | 1424091_at   | Region | AI449175           | 234362 | 8  | 68761621  | 68776282  | - |
| 2366 | 1437193_s_at | Region | Snrpb              | 20638  | 2  | 129685499 | 129693214 | - |
| 2367 | 1424160_at   | Region | Alg5               | 66248  | 3  | 54369759  | 54384015  | + |
| 2368 | 1435848_at   | Region | None               | None   | 2  | 103847827 | 103848529 | - |
| 2369 | 1417367_at   | Region | Ppp2ca             | 19052  | 11 | 51851665  | 51875590  | + |
| 2370 | 1421814_at   | Region | None               | None   | X  | 90697403  | 90769918  | + |
| 2371 | 1420150_at   | Region | 4930422J18Rik      | 74646  | 4  | 148388645 | 148447368 | - |
| 2372 | 1418500_at   | Region | Nap1I3             | 54561  | X  | 116744828 | 116747653 | - |
| 2373 | 1420427_a_at | Region | Dhx32              | 101437 | 7  | 128088696 | 128144455 | - |
| 2374 | 1460386_a_at | Region | Slc1a1             | 20510  | 19 | 28087763  | 28166557  | + |
| 2375 | 1424274_at   | Region | MGI:1929095        | 56041  | 5  | 91473766  | 91538623  | + |
| 2376 | 1455793_at   | Region | BC035537           | 212326 | 8  | 44287329  | 44330422  | - |
| 2377 | 1434773_a_at | Region | Slc2a1             | 20525  | 4  | 118067673 | 118096232 | + |
| 2378 | 1419470_at   | Region | Gnb4               | 14696  | 3  | 31991704  | 32024713  | - |
| 2379 | 1423022_at   | Region | Adra2a             | 11551  | 19 | 53625137  | 53626489  | + |
| 2380 | 1451506_at   | Region | Mef2c              | 17260  | 13 | 79604158  | 79763912  | + |
| 2381 | 1434892_x_at | Region | Rbbp4              | 19646  | 4  | 128334213 | 128362483 | - |
| 2382 | 1441845_at   | Region | Caps2              | 353025 | 10 | 111832648 | 111885573 | + |
| 2383 | 1428469_a_at | Region | Dzip1              | 66573  | 14 | 113431542 | 113479731 | - |
| 2384 | 1458104_a_at | Region | BC038167           | 270150 | 9  | 44229553  | 44236161  | + |
| 2385 | 1448530_at   | Region | Gmpr               | 66355  | 13 | 45082625  | 45121536  | + |
| 2386 | 1418263_at   | Region | Ddx25              | 30959  | 9  | 35454284  | 35470923  | - |
| 2387 | 1454604_s_at | Region | Tspan12            | 269831 | 6  | 21818432  | 21899551  | - |
| 2388 | 1448556_at   | Region | Prlr               | 19116  | 15 | 9991399   | 10143512  | + |
| 2389 | 1440425_at   | Region | Odz2               | 23964  | 11 | 35801678  | 36738275  | - |
| 2390 | 1448533_at   | Region | Ckap1              | 66411  | 7  | 25637313  | 25645090  | - |
| 2391 | 1440545_at   | Region | None               | None   | 10 | 10560914  | 10561650  | - |
| 2392 | 1436328_at   | Region | Rnmt               | 67897  | 18 | 68531175  | 68554593  | + |
| 2393 | 1451047_at   | Region | Itm2a              | 16431  | X  | 101998560 | 102004725 | - |
| 2394 | 1456258_at   | Region | Emx2               | 13797  | 19 | 59057931  | 59064916  | + |
| 2395 | 1430286_s_at | Region | Ppp1r14c           | 76142  | 10 | 7041618   | 7140096   | - |
| 2396 | 1455717_s_at | Region | Daam2              | 76441  | 17 | 46989103  | 47096816  | - |
| 2397 | 1450745_at   | Region | C1galt1            | 94192  | 6  | 7821663   | 7848379   | + |
| 2398 | 1418038_s_at | Region | Dusp19             | 68082  | 2  | 80314963  | 80329410  | + |
| 2399 | 1451041_at   | Region | Rock2              | 19878  | 12 | 16262121  | 16345038  | + |
| 2400 | 1435926_at   | Region | E030003F13Rik      | 98357  | 1  | 175614946 | 175616280 | - |
| 2401 | 1437568_at   | Region | Mmp16              | 17389  | 4  | 17780448  | 18043598  | + |
| 2402 | 1416239_at   | Region | Ass1               | 11898  | 2  | 31402432  | 31452832  | + |
| 2403 | 1416153_at   | Region | Srp54              | 24067  | 12 | 51906616  | 51907500  | + |
| 2404 | 1417286_at   | Region | Ndufa5             | 68202  | 6  | 24568151  | 24577172  | - |
| 2405 | 1458129_at   | Region | Rora               | 19883  | 9  | 69474948  | 69510983  | + |
| 2406 | 1419267_at   | Region | Nfyb               | 18045  | 10 | 82637842  | 82652084  | - |
|      |              |        | Pcdha4 /// Pcdha6  |        |    |           |           |   |
|      |              |        | /// Pcdha7 ///     |        |    |           |           |   |
|      |              |        | Pcdha5 /// Pcdha11 |        |    |           |           |   |
|      |              |        | /// Pcdha10 ///    |        |    |           |           |   |
|      |              |        | Pcdha1 /// Pcdha9  |        |    |           |           |   |
|      |              |        | /// Pcdha3 ///     |        |    |           |           |   |
|      |              |        | Pcdha12 /// Pcdha2 |        |    |           |           |   |
|      |              |        | /// Pcdha8 ///     |        |    |           |           |   |
|      |              |        | Pcdhac1 ///        |        |    |           |           |   |
| 2407 | 1420798_s_at | Region | Pcdhac2            | 116731 | 18 | 37154024  | 37411380  | + |
| 2408 | 1424823_s_at | Region | 9630044O09Rik      | 105439 | 14 | 98195231  | 98249790  | + |
| 2409 | 1437569_at   | Region | Gm644              | 270893 | 11 | 82128559  | 82185986  | + |
| 2410 | 1454630_at   | Region | BC034054           | 217125 | 11 | 94830966  | 94847171  | + |
| 2411 | 1427432_a_at | Region | Sfrs10             | 20462  | 16 | 21019108  | 21039299  | - |
| 2412 | 1426769_s_at | Region | Maml1              | 103806 | 11 | 50008479  | 50019709  | - |
|      |              |        | Odc1 ///           |        |    |           |           |   |
|      |              |        | LOC545783 ///      |        |    |           |           |   |
| 2413 | 1427364_a_at | Region | LOC546355          | 18263  | 12 | 16906701  | 16912688  | + |
| 2414 | 1459890_s_at | Region | 1110008P14Rik      | 73737  | 2  | 32311270  | 32314046  | - |
| 2415 | 1429857_at   | Region | 2900092D14Rik      | 73100  | 1  | 42995052  | 42996125  | + |
| 2416 | 1426465_at   | Region | Dlgap4             | 228836 | 2  | 156157648 | 156219872 | + |

|      |              |        |               |        |    |           |           |   |
|------|--------------|--------|---------------|--------|----|-----------|-----------|---|
| 2417 | 1426447_at   | Region | Nup35         | 69482  | 2  | 80336563  | 80356651  | + |
| 2418 | 1423444_at   | Region | Rock1         | 19877  | 18 | 10112811  | 10226661  | - |
| 2419 | 1453070_at   | Region | Gm78          | 219228 | 14 | 78894017  | 78896229  | + |
| 2420 | 1423753_at   | Region | Bambi         | 68010  | 18 | 3512543   | 3520990   | + |
| 2421 | 1440346_at   | Region | Jmjd3         | 216850 | 11 | 69124177  | 69124997  | + |
| 2422 | 1425718_a_at | Region | Ivns1abp      | 117198 | 1  | 151200258 | 151220009 | + |
| 2423 | 1423712_a_at | Region | Qars          | 97541  | 9  | 108556974 | 108564815 | + |
| 2424 | 1430752_at   | Region | C330006D17Rik | 77616  | 9  | 7841818   | 7843031   | - |
| 2425 | 1422465_a_at | Region | Nxn           | 18230  | 11 | 75983616  | 76124799  | - |
| 2426 | 1423202_a_at | Region | Ncor1         | 20185  | 11 | 62043183  | 62164152  | - |
| 2427 | 1454621_s_at | Region | 5730472N09Rik | 108958 | 2  | 30296497  | 30317681  | + |
| 2428 | 1421622_a_at | Region | Rapgef4       | 56508  | 2  | 71679030  | 71954119  | + |
| 2429 | 1455149_at   | Region | Sh3md2        | 59009  | 8  | 60271818  | 60461252  | + |
| 2430 | 1427522_at   | Region | Arhgap20      | 244867 | 9  | 51837391  | 51925006  | + |
| 2431 | 1421201_a_at | Region | Tro           | 56191  | X  | 144179698 | 144191794 | - |
| 2432 | 1441751_at   | Region | AW493563      | 101365 | 6  | 67546604  | 67547052  | + |
| 2433 | 1434565_at   | Region | Cgrrf1        | 68755  | 14 | 41912127  | 41934073  | + |
| 2434 | 1453384_at   | Region | 4632404N19Rik | 77060  | 1  | 138939816 | 138983492 | + |
| 2435 | 1424119_at   | Region | Prkab1        | 19079  | 5  | 115135107 | 115145945 | - |
| 2436 | 1448361_at   | Region | Ttc3          | 22129  | 16 | 93778128  | 93866771  | + |
| 2437 | 1445008_at   | Region | 1600019O04Rik | 72007  | 3  | 26833958  | 27060578  | - |
| 2438 | 1418478_at   | Region | Lmo1          | 109594 | 7  | 102991520 | 103023462 | - |
| 2439 | 1429033_at   | Region | Gcc1          | 74375  | 6  | 28464824  | 28475387  | - |
| 2440 | 1439274_at   | Region | A230083H22Rik | 353211 | 19 | 16360850  | 16417892  | + |
| 2441 | 1435704_at   | Region | C920006O11Rik | 320295 | 9  | 78344674  | 78347716  | + |
| 2442 | 1422184_a_at | Region | Ak1           | 11636  | 2  | 32561666  | 32567214  | + |
| 2443 | 1452211_at   | Region | Psme4         | 103554 | 11 | 30666852  | 30774524  | + |
| 2444 | 1456871_a_at | Region | Phf201        | 239510 | 15 | 66601624  | 66648123  | + |
| 2445 | 1416214_at   | Region | Mcm4          | 17217  | 16 | 14393171  | 14406424  | - |
| 2446 | 1434121_at   | Region | Lgi4          | 243914 | 7  | 26468265  | 26479106  | + |
| 2447 | 1460465_at   | Region | A930038C07Rik | 68169  | 6  | 65929438  | 65964757  | + |
| 2448 | 1447725_at   | Region | C030034E14Rik | 77469  | X  | 97617303  | 97617574  | + |
| 2449 | 1446059_at   | Region | 2900086E13Rik | 73057  | 3  | 151969763 | 151970485 | - |
| 2450 | 1452291_at   | Region | Centd1        | 212285 | 5  | 61409120  | 61555599  | - |
| 2451 | 1415933_a_at | Region | Cox5a         | 12858  | 9  | 57635235  | 57646353  | + |
| 2452 | 1449243_a_at | Region | Rps19         | 20085  | 7  | 20062265  | 20067353  | + |
| 2453 | 1449630_s_at | Region | Mark1         | 226778 | 1  | 184396055 | 184497931 | - |
| 2454 | 1457142_at   | Region | Efcfbp1       | 69352  | 4  | 14879213  | 15076079  | - |
| 2455 | 1428334_at   | Region | Ostm1         | 14628  | 10 | 42785277  | 42808815  | + |
| 2456 | 1431502_a_at | Region | Exosc3        | 66362  | 4  | 45232551  | 45236525  | - |
| 2457 | 1422168_a_at | Region | Bdnf          | 12064  | 2  | 109298487 | 109350793 | + |
| 2458 | 1434100_x_at | Region | None          | None   | 5  | 50264886  | 50265410  | - |
| 2459 | 1428971_at   | Region | 5730405I09Rik | 67974  | 18 | 9356614   | 9490220   | - |
| 2460 | 1419367_at   | Region | Decr1         | 67460  | 4  | 15844205  | 15872472  | - |
| 2461 | 1419272_at   | Region | Myd88         | 17874  | 9  | 119330249 | 119334301 | - |
| 2462 | 1417695_a_at | Region | Soat1         | 20652  | 1  | 156336595 | 156379733 | - |
| 2463 | 1423967_at   | Region | Palm          | 18483  | 10 | 79929264  | 79943520  | + |
| 2464 | 1424311_at   | Region | 0710008K08Rik | 69225  | 8  | 10870028  | 10885710  | + |
| 2465 | 1448461_a_at | Region | 1500006O09Rik | 66231  | 14 | 12411167  | 12423386  | - |
| 2466 | 1442311_at   | Region | None          | None   | 15 | 11935334  | 11935727  | + |
| 2467 | 1446621_at   | Region | Chd7          | 320790 | 4  | 8617703   | 8793952   | + |
| 2468 | 1426068_at   | Region | Slc7a4        | 224022 | 16 | 16343928  | 16347174  | - |
| 2469 | 1438417_at   | Region | Pwyp2         | 101631 | 7  | 133644194 | 133662714 | + |
| 2470 | 1422935_x_at | Region | Cbx1          | 12412  | 11 | 96610246  | 96629727  | + |
| 2471 | 1441782_at   | Region | Aak1          | 269774 | 6  | 87421662  | 87422107  | + |
| 2472 | 1438685_at   | Region | Zfp258        | 100177 | 4  | 126104496 | 126151407 | + |
| 2473 | 1438288_x_at | Region | 1110059G02Rik | 68786  | 15 | 55640896  | 55641301  | - |
| 2474 | 1424002_at   | Region | Pdcl3         | 68833  | 1  | 39284731  | 39294153  | + |
| 2475 | 1424876_s_at | Region | Spg20         | 229285 | 3  | 54746476  | 54770293  | + |
| 2476 | 1416338_at   | Region | Sh3gl1        | 20405  | 17 | 53654884  | 53674711  | - |
| 2477 | 1435527_at   | Region | 1500041O16Rik | 69000  | 10 | 81533107  | 81535984  | - |
| 2478 | 1448583_at   | Region | AA960436      | 101985 | 8  | 94616511  | 94631989  | + |
| 2479 | 1417423_at   | Region | Grina         | 66168  | 15 | 76295479  | 76298576  | + |
| 2480 | 1436424_at   | Region | 1600020E01Rik | 72012  | 6  | 86961038  | 86999299  | + |
| 2481 | 1457334_at   | Region | C130057M05Rik | 399581 | 2  | 59038211  | 59038889  | + |

|      |              |        |               |        |      |           |           |      |
|------|--------------|--------|---------------|--------|------|-----------|-----------|------|
| 2482 | 1448869_a_at | Region | Mrps16        | 66242  | 14   | 18752543  | 18754867  | -    |
| 2483 | 1418580_at   | Region | 5830458K16Rik | 67775  | 16   | 22393472  | 22397762  | +    |
| 2484 | 1421871_at   | Region | Sh3bgrl       | 56726  | X    | 103696772 | 103763832 | +    |
| 2485 | 1443526_at   | Region | Bhc80         | 192285 | 2    | 91918732  | 92065593  | +    |
| 2486 | 1423739_x_at | Region | Aplp2         | 11804  | 9    | 31068390  | 31130767  | -    |
| 2487 | 1456900_at   | Region | None          | None   | NONE | NONE      | NONE      | NONE |
| 2488 | 1435286_at   | Region | AW125296      | 100928 | 5    | 83313855  | 83315294  | -    |
| 2489 | 1450191_a_at | Region | Sox13         | 20668  | 1    | 133243646 | 133254561 | -    |
| 2490 | 1435952_at   | Region | None          | None   | 14   | 70783174  | 70784116  | +    |
| 2491 | 1433871_at   | Region | R3hdm         | 226412 | 1    | 127946018 | 128080726 | +    |
| 2492 | 1418754_at   | Region | Adcy8         | 11514  | 15   | 64715509  | 64946754  | -    |
| 2493 | 1436303_at   | Region | Mllt4         | 17356  | 17   | 11961032  | 11968166  | +    |
| 2494 | 1450268_at   | Region | Fign          | 60344  | 2    | 63833231  | 63953388  | -    |
| 2495 | 1435078_at   | Region | 3526402J09Rik | 237960 | 11   | 105747891 | 105750394 | +    |
| 2496 | 1451101_a_at | Region | Rps28         | 54127  | 17   | 31521434  | 31522877  | -    |
| 2497 | 1425525_a_at | Region | P2rx4         | 18438  | 5    | 121860532 | 121881953 | +    |
| 2498 | 1416958_at   | Region | Nr1d2         | 353187 | 14   | 16722078  | 16757007  | -    |
| 2499 | 1455070_at   | Region | AL118268      | 404593 | 18   | 44642566  | 44644468  | +    |
| 2500 | 1449091_at   | Region | Cldn8         | 54420  | 16   | 87717961  | 87720270  | -    |
| 2501 | 1420824_at   | Region | Sema4d        | 20354  | 13   | 50254932  | 50347328  | -    |
| 2502 | 1423368_at   | Region | Laptm4a       | 17775  | 12   | 8237726   | 8255043   | +    |
| 2503 | 1434115_at   | Region | None          | None   | 8    | 118667300 | 118668747 | +    |
| 2504 | 1455147_at   | Region | None          | None   | 17   | 66619665  | 66620418  | +    |
| 2505 | 1418819_at   | Region | Arl10c        | 67166  | 6    | 109286299 | 109326908 | +    |
| 2506 | 1433169_at   | Region | 5830456J23Rik | 76105  | 8    | 80748226  | 80749437  | +    |
| 2507 | 1452350_at   | Region | Brd8          | 78656  | 18   | 34822848  | 34847583  | -    |
| 2508 | 1417704_a_at | Region | Arhgap6       | 11856  | X    | 162395378 | 162903843 | +    |
| 2509 | 1435452_at   | Region | Tmem20        | 240660 | 19   | 37739783  | 37749410  | +    |
| 2510 | 1417594_at   | Region | Gkap1         | 56278  | 13   | 56862150  | 56893001  | -    |
| 2511 | 1442561_at   | Region | Mamdc1        | 320772 | 12   | 63250963  | 63650479  | -    |
| 2512 | 1452371_at   | Region | Sfrs11        | 69207  | 3    | 157020040 | 157032607 | -    |
| 2513 | 1419659_s_at | Region | Chic2         | 74277  | 5    | 73840608  | 73878810  | -    |
| 2514 | 1454764_s_at | Region | None          | None   | 15   | 96638716  | 96639445  | -    |
| 2515 | 1436278_at   | Region | None          | None   | X    | 15794540  | 15795257  | -    |
| 2516 | 1427940_s_at | Region | Mycbp         | 56309  | 4    | 122932163 | 122939256 | +    |
| 2517 | 1437974_a_at | Region | Hk1           | 15275  | 10   | 62236465  | 62346218  | -    |
| 2518 | 1417592_at   | Region | Frap1         | 56717  | 4    | 146940969 | 147050045 | +    |
| 2519 | 1438181_x_at | Region | Tm2d2         | 69742  | 8    | 23740385  | 23746364  | +    |
| 2520 | 1434602_at   | Region | Thrap2        | 76199  | 5    | 117691302 | 117893539 | +    |
| 2521 | 1436836_x_at | Region | Cnn3          | 71994  | 3    | 120205773 | 120237098 | +    |
| 2522 | 1437885_at   | Region | D030029J20Rik | 99324  | 2    | 84285069  | 84285864  | -    |
| 2523 | 1436555_at   | Region | Al158848      | 101999 | 8    | 39856551  | 39857966  | +    |
| 2524 | 1417023_a_at | Region | Fabp4         | 11770  | 3    | 10205894  | 10210101  | -    |
| 2525 | 1423332_at   | Region | Sdcbp         | 53378  | 4    | 6304221   | 6322796   | +    |
| 2526 | 1439050_at   | Region | Al649393      | 99692  | 3    | 121046233 | 121048320 | +    |
|      |              |        | Hspca ///     |        |      |           |           |      |
|      |              |        | LOC544800 /// |        |      |           |           |      |
| 2527 | 1437497_a_at | Region | LOC545508     | 15519  | 12   | 106166269 | 106171628 | -    |
| 2528 | 1443870_at   | Region | Abcc4         | 239273 | 14   | 113037659 | 113045535 | -    |
| 2529 | 1453257_at   | Region | Agpat5        | 52123  | 8    | 18791504  | 18829381  | +    |
| 2530 | 1460323_at   | Region | Tars          | 110960 | 15   | 11193522  | 11211606  | -    |
| 2531 | 1420859_at   | Region | Pkia          | 18767  | 3    | 7341242   | 7419938   | +    |
| 2532 | 1439633_at   | Region | B230112P13Rik | 109325 | 19   | 9648338   | 9649678   | +    |
| 2533 | 1451867_x_at | Region | Arhgap6       | 11856  | X    | 162395378 | 162903843 | +    |
| 2534 | 1423161_s_at | Region | Spred1        | 114715 | 2    | 116635298 | 116693185 | +    |
| 2535 | 1450712_at   | Region | Kcnj9         | 16524  | 1    | 172251006 | 172258201 | -    |
| 2536 | 1423665_a_at | Region | Rpl5          | 19983  | 5    | 106971039 | 106978499 | +    |
| 2537 | 1451197_s_at | Region | Gatad2a       | 234366 | 8    | 69059749  | 69147743  | -    |
| 2538 | 1434094_at   | Region | 6330530A05Rik | 230678 | 4    | 117499847 | 117502633 | -    |
| 2539 | 1434064_at   | Region | BC061259      | 269999 | 7    | 121819655 | 121824814 | +    |
| 2540 | 1455205_a_at | Region | Usp19         | 71472  | 9    | 108541037 | 108550266 | +    |
| 2541 | 1416952_at   | Region | Atp6v1d       | 73834  | 12   | 75699581  | 75718058  | -    |
| 2542 | 1450726_at   | Region | Asah2         | 54447  | 19   | 31310118  | 31428612  | -    |
| 2543 | 1428966_at   | Region | 2610204K14Rik | 67148  | 7    | 75571092  | 75577629  | +    |
| 2544 | 1460220_a_at | Region | Csf1          | 12977  | 3    | 107536887 | 107556052 | -    |



|      |              |        |                     |        |    |           |           |   |
|------|--------------|--------|---------------------|--------|----|-----------|-----------|---|
| 2545 | 1417981_at   | Region | Insig2              | 72999  | 1  | 121067561 | 121095788 | - |
| 2546 | 1431230_a_at | Region | Btbd9               | 224671 | 17 | 28030141  | 28340405  | - |
| 2547 | 1449275_at   | Region | 2310038H17Rik       | 67099  | 1  | 64900564  | 64911252  | - |
| 2548 | 1426811_at   | Region | Ppp2r5b             | 225849 | 19 | 6016555   | 6024421   | - |
| 2549 | 1416107_at   | Region | Nsg2                | 18197  | 11 | 31895253  | 31953996  | + |
| 2550 | 1421959_s_at | Region | Adcy3               | 104111 | 12 | 3286276   | 3366296   | + |
| 2551 | 1448211_at   | Region | Atp6v0e2            | 76252  | 6  | 48670494  | 48674677  | + |
| 2552 | 1425987_a_at | Region | Kcnma1              | 16531  | 14 | 21672901  | 22164598  | - |
| 2553 | 1431058_at   | Region | Htatsf1             | 72459  | X  | 51808329  | 51821897  | + |
| 2554 | 1435896_at   | Region | Sfxn2               | 94279  | 19 | 46120441  | 46142562  | + |
| 2555 | 1419359_at   | Region | Hexim1              | 192231 | 11 | 102937414 | 102940814 | + |
| 2556 | 1424494_s_at | Region | 2810417J12Rik       | 76917  | 17 | 21579098  | 21588259  | - |
| 2557 | 1423596_at   | Region | Nek6                | 59126  | 2  | 38443862  | 38520203  | + |
| 2558 | 1427552_a_at | Region | Gstz1               | 14874  | 12 | 84027344  | 84044349  | + |
| 2559 | 1452832_s_at | Region | Cds2                | 110911 | 2  | 131777151 | 131821546 | + |
| 2560 | 1451663_a_at | Region | Trim3               | 55992  | 7  | 99724514  | 99748443  | - |
| 2561 | 1431081_a_at | Region | Plscr3              | 70310  | 11 | 69572334  | 69577716  | + |
| 2562 | 1455720_at   | Region | Adamts2             | 216725 | 11 | 50354926  | 50556890  | + |
| 2563 | 1431239_at   | Region | Nono                | 53610  | X  | 96031077  | 96049950  | + |
| 2564 | 1427489_at   | Region | Itga8               | 241226 | 2  | 12022669  | 12217929  | - |
| 2565 | 1425553_s_at | Region | Hip1r               | 29816  | 5  | 123144623 | 123174525 | + |
| 2566 | 1436648_at   | Region | Nanos1              | 332397 | 19 | 60357055  | 60358437  | + |
| 2567 | 1428938_at   | Region | Gnaq                | 14682  | 19 | 15357188  | 15609698  | + |
| 2568 | 1429881_at   | Region | Arhgap15            | 76117  | 2  | 43681013  | 44318825  | + |
| 2569 | 1451040_at   | Region | Hars2               | 66044  | 2  | 144056919 | 144225657 | + |
| 2570 | 1424391_at   | Region | Nrd1                | 230598 | 4  | 107959710 | 108020676 | + |
| 2571 | 1434139_at   | Region | Parp11              | 101187 | 6  | 128134841 | 128183937 | + |
|      |              |        | Akr1b3 ///          |        |    |           |           |   |
| 2572 | 1437133_x_at | Region | LOC432549           | 11677  | 6  | 34398202  | 34411739  | - |
| 2573 | 1421252_a_at | Region | Mef2a               | 17258  | 7  | 61122705  | 61262817  | - |
| 2574 | 1452083_a_at | Region | Pja1                | 18744  | X  | 94067507  | 94072041  | - |
| 2575 | 1426738_at   | Region | Dgkz                | 104418 | 2  | 91637575  | 91668348  | - |
| 2576 | 1425089_at   | Region | Kcnc4               | 99738  | 3  | 107234132 | 107254727 | - |
| 2577 | 1426342_at   | Region | 1300006C19Rik       | 68292  | 9  | 115225956 | 115293786 | - |
| 2578 | 1450560_a_at | Region | Ppp2r5d             | 21770  | 17 | 44193595  | 44215645  | - |
| 2579 | 1435363_at   | Region | Plekkg1             | 213783 | 10 | 6541247   | 6634764   | - |
| 2580 | 1437069_at   | Region | Osbp18              | 237542 | 10 | 110787653 | 110920098 | + |
| 2581 | 1455599_at   | Region | AI850995            | 328232 | 13 | 42757680  | 42758797  | - |
| 2582 | 1428876_at   | Region | Srp72               | 66661  | 5  | 76219172  | 76244365  | + |
| 2583 | 1428213_at   | Region | 2410003A14Rik       | 67872  | 7  | 124655799 | 124696376 | - |
| 2584 | 1445498_at   | Region | Ryr2                | 20191  | 13 | 11561136  | 11985749  | - |
| 2585 | 1435625_at   | Region | Entpd7              | 93685  | 19 | 43234237  | 43276021  | + |
|      |              |        |                     |        |    |           |           |   |
| 2586 | 1450368_a_at | Region | Ppp3r1 /// AI553587 | 103784 | 11 | 17106711  | 17128589  | + |
| 2587 | 1435265_at   | Region | None                | None   | 15 | 58184883  | 58186400  | - |
| 2588 | 1428484_at   | Region | Osbp13              | 71720  | 6  | 50441339  | 50527369  | - |
| 2589 | 1417041_at   | Region | Rpo1-1              | 20016  | 17 | 43753849  | 43757884  | - |
| 2590 | 1426662_at   | Region | Cmas                | 12764  | 6  | 143600335 | 143622749 | + |
| 2591 | 1434266_at   | Region | AI847670            | 330050 | 5  | 19877356  | 19886950  | + |
| 2592 | 1424271_at   | Region | Dcamk1              | 13175  | 3  | 54876964  | 55171014  | + |
| 2593 | 1446280_at   | Region | Foxp1               | 108655 | 6  | 99395348  | 99630926  | - |
| 2594 | 1458306_at   | Region | F630022B06Rik       | 239827 | 16 | 30743325  | 30755417  | + |
| 2595 | 1442050_at   | Region | Zfp608              | 269023 | 18 | 55107188  | 55211729  | - |
| 2596 | 1422621_at   | Region | Ranbp2              | 19386  | 10 | 58404785  | 58452252  | + |
| 2597 | 1434406_at   | Region | Srgap2              | 14270  | 1  | 131135970 | 131377678 | - |
| 2598 | 1428537_at   | Region | Csnk1a1             | 93687  | 18 | 61784394  | 61817111  | + |
| 2599 | 1416598_at   | Region | Glis2               | 83396  | 16 | 4266217   | 4287457   | + |
| 2600 | 1448131_at   | Region | Mfn2                | 170731 | 4  | 146365961 | 146397066 | - |
| 2601 | 1424764_at   | Region | Sez6l               | 56747  | 5  | 111489140 | 111647147 | - |
| 2602 | 1449011_at   | Region | Slc12a7             | 20499  | 13 | 69823556  | 69876719  | + |
| 2603 | 1451348_at   | Region | Depdc6              | 97998  | 15 | 55114270  | 55254734  | + |
| 2604 | 1436642_x_at | Region | AI849053            | 329697 | 3  | 87942302  | 87947130  | - |
| 2605 | 1418116_at   | Region | MGI:1929890         | 64164  | 1  | 155937531 | 155950350 | + |
| 2606 | 1423931_s_at | Region | Anapc4              | 52206  | 5  | 51644274  | 51676873  | + |
| 2607 | 1434854_a_at | Region | Rps10               | 67097  | 17 | 25426347  | 25431160  | - |

|      |              |        |               |        |    |           |           |   |
|------|--------------|--------|---------------|--------|----|-----------|-----------|---|
| 2608 | 1416647_at   | Region | Bckdha        | 12039  | 7  | 20794453  | 20823194  | - |
| 2609 | 1452862_at   | Region | B930013M22Rik | 68750  | 13 | 37486050  | 37490651  | + |
| 2610 | 1419749_at   | Region | Dnmt2         | 13434  | 2  | 13426173  | 13460673  | - |
| 2611 | 1455950_x_at | Region | Rpl35         | 66489  | 2  | 38933743  | 38937293  | - |
| 2612 | 1456071_a_at | Region | Cycs          | 13063  | 6  | 50708965  | 50711007  | - |
| 2613 | 1448549_a_at | Region | Dpagt1        | 13478  | 9  | 44315700  | 44322455  | + |
| 2614 | 1422779_at   | Region | Smpd3         | 58994  | 8  | 105548395 | 105633835 | - |
| 2615 | 1422895_at   | Region | Vamp4         | 53330  | 1  | 162480609 | 162508875 | + |
| 2616 | 1419874_x_at | Region | Zbtb16        | 235320 | 9  | 48684510  | 48863820  | - |
| 2617 | 1442556_at   | Region | None          | None   | 14 | 73072014  | 73072676  | - |
| 2618 | 1435380_at   | Region | None          | None   | 11 | 63688277  | 63689440  | - |
| 2619 | 1458295_at   | Region | BC038331      | 408056 | 3  | 88078606  | 88078982  | - |
| 2620 | 1418553_at   | Region | Arhgef18      | 102098 | 8  | 4103      | 13701     | - |
| 2621 | 1428987_at   | Region | Dncl2b        | 75465  | 8  | 115826983 | 115837883 | + |
| 2622 | 1448707_at   | Region | Taf13         | 99730  | 3  | 108367441 | 108377810 | + |
| 2623 | 1434398_at   | Region | 9430034D17Rik | 77286  | X  | 31508160  | 31510142  | - |
| 2624 | 1437576_at   | Region | 2810427A07Rik | 72767  | 17 | 33639368  | 33640114  | + |
| 2625 | 1416634_at   | Region | 5730536A07Rik | 68250  | 9  | 66249938  | 66262282  | + |
| 2626 | 1416655_at   | Region | C1galt1c1     | 59048  | X  | 33151587  | 33155905  | - |
| 2627 | 1437199_at   | Region | Gm337         | 240672 | 19 | 53094474  | 53112857  | + |
| 2628 | 1420839_at   | Region | Plekha3       | 83435  | 2  | 76373044  | 76394322  | + |
| 2629 | 1415821_at   | Region | Sdfr1         | 20320  | 9  | 58698947  | 58769508  | + |
| 2630 | 1454301_at   | Region | 2900073C17Rik | 73020  | 8  | 47806282  | 47807725  | - |
| 2631 | 1458386_at   | Region | C030009J22Rik | 320436 | 12 | 97716964  | 97717978  | + |
| 2632 | 1434001_at   | Region | 2210019E14Rik | 70387  | 19 | 8007843   | 8015835   | - |
| 2633 | 1434595_at   | Region | Trim9         | 94090  | 12 | 67079894  | 67179488  | - |
| 2634 | 1425348_a_at | Region | Srprb         | 20818  | 9  | 103163286 | 103177389 | - |
| 2635 | 1438115_a_at | Region | Slc9a3r1      | 26941  | 11 | 114984496 | 115002271 | + |
| 2636 | 1440841_at   | Region | Ywhae         | 22627  | 11 | 75458597  | 75491496  | + |
| 2637 | 1429765_at   | Region | 1500005K14Rik | 76566  | 11 | 75746247  | 75753441  | - |
| 2638 | 1452163_at   | Region | Ets1          | 23871  | 9  | 32617946  | 32676163  | + |
| 2639 | 1437556_at   | Region | Zfhx4         | 80892  | 3  | 5216397   | 5389236   | + |
| 2640 | 1443139_at   | Region | None          | None   | 2  | 112100460 | 112100964 | - |
| 2641 | 1426830_a_at | Region | Ahcyl1        | 229709 | 3  | 107460335 | 107492339 | - |
| 2642 | 1452296_at   | Region | Slit3         | 20564  | 11 | 34912664  | 35502537  | + |
| 2643 | 1416008_at   | Region | Satb1         | 20230  | 17 | 49274277  | 49367498  | - |
| 2644 | 1425323_a_at | Region | BC008155      | 214917 | 17 | 23596506  | 23598387  | - |
| 2645 | 1454745_at   | Region | Arhgap29      | 214137 | 3  | 120732219 | 120795050 | + |
| 2646 | 1418252_at   | Region | Padi2         | 18600  | 4  | 139787688 | 139833847 | + |
| 2647 | 1449038_at   | Region | Hsd11b1       | 15483  | 1  | 192960453 | 193002809 | - |
| 2648 | 1456941_at   | Region | Tert          | 21752  | 13 | 69686209  | 69708153  | + |
| 2649 | 1434834_at   | Region | Socs7         | 192157 | 11 | 97183638  | 97214721  | + |
| 2650 | 1449029_at   | Region | Mknk2         | 17347  | 10 | 80797130  | 80803778  | - |
| 2651 | 1429155_at   | Region | 4933411K20Rik | 66756  | 8  | 45112900  | 45139459  | + |
| 2652 | 1451353_at   | Region | Tm6sf1        | 107769 | 7  | 75667263  | 75692207  | + |
| 2653 | 1436270_at   | Region | ---           | 327951 | 11 | 69119270  | 69121291  | - |
| 2654 | 1416940_at   | Region | Ppif          | 105675 | 14 | 24069368  | 24075666  | + |
|      |              |        | Odc1 ///      |        |    |           |           |   |
|      |              |        | LOC545783 /// |        |    |           |           |   |
| 2655 | 1437711_x_at | Region | LOC546355     | 18263  | 12 | 16906701  | 16912688  | + |
|      |              |        | Rpl29 ///     |        |    |           |           |   |
|      |              |        | LOC433350 /// |        |    |           |           |   |
|      |              |        | LOC433383 /// |        |    |           |           |   |
|      |              |        | LOC433941 /// |        |    |           |           |   |
| 2656 | 1454627_a_at | Region | LOC545658     | 19944  | 9  | 106423093 | 106425121 | + |
| 2657 | 1446181_at   | Region | C85699        | 97104  | 3  | 72946026  | 72946451  | + |
| 2658 | 1451275_at   | Region | E030041M21Rik | 75089  | 10 | 89716350  | 89789724  | + |
| 2659 | 1436934_s_at | Region | Aco2          | 11429  | 15 | 81923222  | 81965850  | + |
| 2660 | 1436546_at   | Region | 6330549D23Rik | 229613 | 3  | 96094498  | 96117655  | - |
| 2661 | 1415705_at   | Region | 9130011J15Rik | 66818  | 8  | 71716686  | 71721857  | - |
| 2662 | 1435240_at   | Region | 5830435C13Rik | 407823 | 2  | 59754763  | 59767240  | - |
| 2663 | 1433587_at   | Region | Rgmb          | 68799  | 17 | 13809790  | 13830123  | - |
| 2664 | 1455716_at   | Region | Epb4.1l1      | 13821  | 2  | 155877989 | 155997768 | + |
| 2665 | 1430123_a_at | Region | Akr1a4        | 58810  | 4  | 115595415 | 115610556 | - |

| Nono /// |              |        |               |        |    |           |           |   |
|----------|--------------|--------|---------------|--------|----|-----------|-----------|---|
| 2666     | 1447160_at   | Region | LOC434808     | 434808 | X  | 75193538  | 75198479  | - |
| 2667     | 1416286_at   | Region | Rgs4          | 19736  | 1  | 169675852 | 169681797 | - |
| 2668     | 1453000_at   | Region | Camsap111     | 67886  | 1  | 136115147 | 136192998 | - |
| 2669     | 1455416_at   | Region | C130021I20    | 329385 | 2  | 33573493  | 33578511  | + |
| 2670     | 1436665_a_at | Region | Ltpb4         | 108075 | 7  | 22679262  | 22713186  | - |
| 2671     | 1436028_at   | Region | Tmem33        | 67878  | 5  | 66026818  | 66052665  | + |
| 2672     | 1424215_at   | Region | Fundc1        | 72018  | X  | 15795509  | 15811237  | - |
| 2673     | 1447980_s_at | Region | Rutbc2        | 52850  | 5  | 112319917 | 112387408 | - |
| 2674     | 1435177_a_at | Region | Anapc5        | 59008  | 5  | 121940636 | 121974194 | - |
| 2675     | 1439757_s_at | Region | Epha4         | 13838  | 1  | 77656420  | 77802175  | - |
| 2676     | 1420499_at   | Region | Gch1          | 14528  | 14 | 42234216  | 42269658  | - |
| 2677     | 1436602_x_at | Region | Cacna1b       | 12287  | 2  | 24538537  | 24695314  | - |
| 2678     | 1434052_at   | Region | AI593442      | 330941 | 9  | 52753199  | 52758226  | - |
| 2679     | 1443369_at   | Region | BC052055      | 328643 | 16 | 19362287  | 19370589  | + |
| 2680     | 1440998_at   | Region | 2310021P13Rik | 268721 | 14 | 19076126  | 19076808  | + |
| 2681     | 1432195_s_at | Region | Ccnl2         | 56036  | 4  | 154304851 | 154316905 | + |
| 2682     | 1416389_a_at | Region | Chc1l         | 105670 | 14 | 67493623  | 67535123  | + |
| 2683     | 1434951_at   | Region | Armc8         | 74125  | 9  | 99381642  | 99469875  | - |
| 2684     | 1418581_a_at | Region | Limk2         | 16886  | 11 | 3239044   | 3303961   | - |
| 2685     | 1423361_at   | Region | Yme111        | 27377  | 2  | 23088708  | 23130798  | + |
| 2686     | 1452166_a_at | Region | Krt1-10       | 16661  | 11 | 99206514  | 99210440  | - |
| 2687     | 1454680_at   | Region | D5Erd579e     | 320661 | 5  | 35088907  | 35109670  | - |
| 2688     | 1430293_a_at | Region | 1300006N24Rik | 71766  | 9  | 20950505  | 20975490  | - |
| 2689     | 1448690_at   | Region | Kcnk1         | 16525  | 8  | 125282699 | 125318214 | + |
| 2690     | 1436029_at   | Region | 4930533K18Rik | 75189  | 10 | 70976804  | 70977955  | - |
| 2691     | 1448297_a_at | Region | Tnk2          | 51789  | 16 | 31477206  | 31491474  | + |
| 2692     | 1420711_a_at | Region | Pxmp3         | 19302  | 3  | 5535229   | 5550853   | - |
| 2693     | 1443924_at   | Region | Prkwnc3       | 279561 | X  | 144764584 | 144852704 | + |
| 2694     | 1448610_a_at | Region | Sod2          | 20656  | 17 | 11516794  | 11524420  | - |
| 2695     | 1423758_at   | Region | E430034L04Rik | 23881  | 5  | 91390328  | 91419486  | - |
| 2696     | 1449046_a_at | Region | 1110007C05Rik | 66124  | 7  | 38544994  | 38549086  | + |
| 2697     | 1426642_at   | Region | Fn1           | 14268  | 1  | 71881640  | 71949288  | - |
| 2698     | 1449711_at   | Region | Atp6v1e1      | 11973  | 6  | 121227218 | 121254659 | - |
| 2699     | 1428813_a_at | Region | Drd1ip        | 68566  | 7  | 134468884 | 134481545 | - |
| 2700     | 1437418_at   | Region | None          | None   | 10 | 92039536  | 92040577  | - |
| 2701     | 1426987_at   | Region | 5430417L22Rik | 108676 | 2  | 118260842 | 118262660 | + |
| 2702     | 1449522_at   | Region | Unc5c         | 22253  | 3  | 140432729 | 140804799 | + |
| 2703     | 1419380_at   | Region | Zfp423        | 94187  | 8  | 86945300  | 87244946  | - |
| 2704     | 1426463_at   | Region | Gphn          | 268566 | 12 | 75199951  | 75541337  | + |
| 2705     | 1424226_at   | Region | 9030617O03Rik | 217830 | 12 | 96224888  | 96318068  | + |
| 2706     | 1423649_at   | Region | 2010300G19Rik | 72098  | 4  | 3476187   | 3501914   | - |
| 2707     | 1423669_at   | Region | Col1a1        | 12842  | 11 | 94757357  | 94772954  | + |
| 2708     | 1457284_at   | Region | None          | None   | 17 | 54298361  | 54299272  | + |
| 2709     | 1442270_at   | Region | Pbx3          | 18516  | 2  | 34104071  | 34304198  | - |
| 2710     | 1426407_at   | Region | 1600010O03Rik | 109120 | 2  | 90722036  | 90724247  | + |
| 2711     | 1439881_at   | Region | C030013E06Rik | 77421  | 11 | 102140887 | 102141344 | - |
| 2712     | 1457182_at   | Region | Map2k7        | 26400  | 8  | 3593945   | 3601130   | + |
| 2713     | 1417536_at   | Region | Zmat2         | 66492  | 18 | 37017688  | 37023425  | + |
| 2714     | 1452128_a_at | Region | MGI:2389572   | 210766 | X  | 70077355  | 70114652  | + |
| 2715     | 1423305_at   | Region | Extl1         | 56219  | 4  | 133317276 | 133332682 | - |
| 2716     | 1448189_a_at | Region | Fliih         | 14248  | 11 | 60439791  | 60452863  | - |
| 2717     | 1418172_at   | Region | Hebp1         | 15199  | 6  | 135895149 | 135929067 | - |
| 2718     | 1433861_at   | Region | Cc2d1b        | 319965 | 4  | 107578861 | 107593027 | + |
| 2719     | 1426248_at   | Region | Stk24         | 223255 | 14 | 115857532 | 115949796 | - |
| 2720     | 1440990_at   | Region | 4832420M10    | 269152 | 1  | 178819927 | 178887843 | + |
| 2721     | 1439906_at   | Region | None          | None   | 12 | 35473160  | 35474153  | + |
| 2722     | 1458112_at   | Region | Adarb2        | 94191  | 13 | 8160097   | 8162666   | + |
| 2723     | 1448968_at   | Region | D7Wsu128e     | 28018  | 7  | 115945280 | 115956990 | + |
| 2724     | 1455328_at   | Region | Accn2         | 11419  | 15 | 99727934  | 99758344  | + |
| 2725     | 1419251_at   | Region | Eps15         | 13858  | 4  | 108239208 | 108344599 | + |
| 2726     | 1436539_at   | Region | Clmn          | 94040  | 12 | 100215893 | 100309212 | - |
| 2727     | 1430052_at   | Region | C030048H21Rik | 77481  | 2  | 26177730  | 26178870  | - |
| 2728     | 1417901_a_at | Region | Ica1          | 15893  | 6  | 8605506   | 8727274   | - |
| 2729     | 1421428_at   | Region | Slc5a7        | 63993  | 17 | 51909352  | 51932924  | - |

|      |              |        |                    |        |    |           |           |   |
|------|--------------|--------|--------------------|--------|----|-----------|-----------|---|
| 2730 | 1455179_at   | Region | Mpp7<br>Smndc1 /// | 75739  | 18 | 7422318   | 7651672   | - |
| 2731 | 1443396_at   | Region | LOC545792          | 545792 | 5  | 108093108 | 108094027 | - |
| 2732 | 1429188_at   | Region | Cox11              | 69802  | 11 | 90459260  | 90466023  | + |
| 2733 | 1420533_at   | Region | Gucy1a3            | 60596  | 3  | 81821497  | 81874847  | - |
| 2734 | 1437349_at   | Region | Ckap5              | 75786  | 2  | 91296435  | 91325425  | + |
| 2735 | 1437000_at   | Region | Dgkq               | 110524 | 5  | 107723259 | 107736984 | - |
| 2736 | 1456339_at   | Region | 2810410D24Rik      | 69254  | 2  | 181580663 | 181581151 | - |
| 2737 | 1436840_x_at | Region | Rpl35              | 66489  | 2  | 38933743  | 38937293  | - |
| 2738 | 1423947_at   | Region | 1110008P14Rik      | 73737  | 2  | 32311270  | 32314046  | - |
| 2739 | 1418161_at   | Region | Jph3               | 57340  | 8  | 121112150 | 121172408 | + |
| 2740 | 1419951_at   | Region | Lman1              | 70361  | 18 | 66213875  | 66235740  | - |
| 2741 | 1451676_at   | Region | Drap1              | 66556  | 19 | 5211601   | 5213706   | - |
| 2742 | 1448732_at   | Region | Ctsb               | 13030  | 14 | 57653056  | 57676512  | + |
| 2743 | 1421055_at   | Region | Lats2 /// Xpo4     | 50523  | 14 | 52225857  | 52269062  | - |
| 2744 | 1426462_at   | Region | Gphn               | 268566 | 12 | 75199951  | 75541337  | + |
| 2745 | 1437585_x_at | Region | Zfp161             | 22666  | 17 | 67159059  | 67165625  | + |
| 2746 | 1419976_s_at | Region | Nfatc3             | 18021  | 8  | 105355731 | 105424292 | + |
| 2747 | 1423726_at   | Region | Vat1               | 26949  | 11 | 101279835 | 101287286 | - |
| 2748 | 1456064_at   | Region | AI504432           | 229694 | 3  | 106835333 | 106846991 | + |
| 2749 | 1452401_at   | Region | Wtap               | 60532  | 17 | 11539853  | 11559714  | + |
| 2750 | 1435019_at   | Region | Atxn7I3            | 217218 | 11 | 102112742 | 102118843 | - |
| 2751 | 1448971_at   | Region | 2410022L05Rik      | 66423  | 8  | 13263410  | 13268885  | - |
| 2752 | 1420970_at   | Region | Adcy7              | 11513  | 8  | 87557754  | 87614390  | + |
| 2753 | 1417969_at   | Region | Fbxo31             | 76454  | 8  | 120933796 | 120960646 | - |
| 2754 | 1434718_at   | Region | Cul3               | 26554  | 1  | 80599109  | 80655022  | - |
| 2755 | 1440268_at   | Region | Trim41             | 211007 | 11 | 48559241  | 48570190  | - |
| 2756 | 1427789_s_at | Region | Gnas               | 14683  | 2  | 173709228 | 173771651 | + |
| 2757 | 1439965_at   | Region | None               | None   | 11 | 75302898  | 75303115  | + |
| 2758 | 1435850_at   | Region | None               | None   | 1  | 3160079   | 3160728   | - |
| 2759 | 1417760_at   | Region | Nr0b1              | 11614  | X  | 80852445  | 80856737  | + |
| 2760 | 1437085_at   | Region | D630039A03Rik      | 242484 | 4  | 57851984  | 57859716  | - |
| 2761 | 1428113_at   | Region | 4930403J22Rik      | 70551  | 14 | 117484003 | 117547608 | - |
| 2762 | 1454763_at   | Region | Ankrd17            | 81702  | 5  | 89524594  | 89663613  | - |
| 2763 | 1418144_a_at | Region | Pip5k1b            | 18720  | 3  | 94547426  | 94594689  | - |
| 2764 | 1436079_s_at | Region | Vapb               | 56491  | 2  | 173198044 | 173239833 | + |
| 2765 | 1445805_x_at | Region | Kcnh3              | 16512  | 15 | 99282782  | 99300623  | + |
| 2766 | 1421951_at   | Region | Lhx1               | 16869  | 11 | 84247371  | 84253526  | - |
| 2767 | 1454969_at   | Region | E130115E03Rik      | 320343 | 2  | 50060532  | 50125726  | + |
| 2768 | 1421477_at   | Region | Cplx2              | 12890  | 13 | 52985707  | 52986681  | + |
| 2769 | 1451131_at   | Region | Arl6ip1            | 54208  | 7  | 111994757 | 112005420 | - |
| 2770 | 1427038_at   | Region | Penk1<br>Rpl17 /// | 18619  | 4  | 4060682   | 4065591   | - |
| 2771 | 1423855_x_at | Region | LOC432963 ///      |        |    |           |           |   |
| 2771 | 1423855_x_at | Region | LOC545631          | 319195 | 18 | 75235707  | 75238565  | + |
| 2772 | 1443120_at   | Region | Pdzk4              | 245469 | X  | 68458430  | 68459109  | - |
| 2773 | 1427763_a_at | Region | Camk2d             | 108058 | 3  | 125480582 | 125726370 | + |
| 2774 | 1422519_at   | Region | Cask               | 12361  | X  | 11759987  | 12085496  | - |
| 2775 | 1417182_at   | Region | Dnaja2             | 56445  | 8  | 84810414  | 84828045  | - |
| 2776 | 1434095_at   | Region | Unc5a              | 107448 | 13 | 53558754  | 53615348  | + |
| 2777 | 1435151_a_at | Region | Rps3               | 27050  | 7  | 93560951  | 93572082  | - |
| 2778 | 1447830_s_at | Region | Rgs2               | 19735  | 1  | 143832060 | 143836212 | - |
| 2779 | 1435554_at   | Region | Tmcc3              | 319880 | 10 | 94549417  | 94562436  | + |
| 2780 | 1440721_at   | Region | 5930433N17Rik      | 399623 | 13 | 113470318 | 113470862 | - |
| 2781 | 1434199_at   | Region | Gm323              | 210573 | 17 | 43052487  | 43058009  | - |
| 2782 | 1435645_at   | Region | Mmd                | 67468  | 11 | 90070563  | 90099660  | + |
| 2783 | 1420800_a_at | Region | Kcnq2              | 16536  | 2  | 180792537 | 180852183 | - |
| 2784 | 1423191_at   | Region | Fnbp4              | 55935  | 2  | 90450119  | 90485770  | + |
| 2785 | 1460509_at   | Region | B3galt1            | 26877  | 2  | 67973343  | 67974323  | + |
| 2786 | 1456039_at   | Region | Snx14              | 244962 | 9  | 88737448  | 88799515  | - |
| 2787 | 1427988_s_at | Region | Safb2              | 224902 | 17 | 54251255  | 54263875  | - |
| 2788 | 1436122_at   | Region | A830025F02Rik      | 213010 | 7  | 5498316   | 5499450   | + |
| 2789 | 1454704_at   | Region | Scarb2             | 12492  | 5  | 91779618  | 91841353  | - |
| 2790 | 1450864_at   | Region | Calm3              | 12315  | 7  | 13866351  | 13874927  | - |
| 2791 | 1429330_at   | Region | Gabra4             | 14397  | 5  | 70350950  | 70437875  | - |

|      |              |        |               |        |    |           |           |   |
|------|--------------|--------|---------------|--------|----|-----------|-----------|---|
| 2792 | 1453078_at   | Region | 8430408J07Rik | 74520  | X  | 102384111 | 102386461 | - |
| 2793 | 1424791_a_at | Region | Lu            | 57278  | 7  | 16625383  | 16639719  | - |
| 2794 | 1435501_at   | Region | C030004M05Rik | 109357 | 12 | 101061010 | 101061772 | - |
|      |              |        | Morf4I2 ///   |        |    |           |           |   |
| 2795 | 1456743_x_at | Region | LOC433261     | 433261 | 19 | 584       | 2363      | - |
| 2796 | 1429401_at   | Region | Stox2         | 71069  | 8  | 46138301  | 46167033  | - |
| 2797 | 1426301_at   | Region | Alcam         | 11658  | 16 | 51168811  | 51372049  | - |
| 2798 | 1424704_at   | Region | Runx2         | 12393  | 17 | 42112502  | 42318792  | - |
| 2799 | 1416243_a_at | Region | Rpl35         | 66489  | 2  | 38933743  | 38937293  | - |
| 2800 | 1439172_at   | Region | Atp13a5       | 268878 | 16 | 28020880  | 28167802  | - |
| 2801 | 1416304_at   | Region | Litaf         | 56722  | 16 | 7206983   | 7214387   | - |
| 2802 | 1419414_at   | Region | Gng13         | 64337  | 17 | 23523224  | 23525085  | + |
| 2803 | 1435424_x_at | Region | None          | None   | 16 | 11009158  | 11009499  | + |
| 2804 | 1434277_a_at | Region | 6430570G24    | 327989 | 11 | 86664419  | 86665560  | - |
| 2805 | 1422889_at   | Region | Pcdh18        | 73173  | 3  | 49331829  | 49346004  | - |
| 2806 | 1425830_a_at | Region | 2810452K22Rik | 67236  | 12 | 106348398 | 106364332 | - |
| 2807 | 1423767_at   | Region | 2810410M20Rik | 66310  | 17 | 72104982  | 72121482  | - |
| 2808 | 1423045_at   | Region | Ncbp2         | 68092  | 16 | 30758010  | 30767552  | + |
| 2809 | 1453061_at   | Region | 2610018O07Rik | 69201  | 18 | 73969713  | 73971071  | - |
| 2810 | 1446967_at   | Region | None          | None   | 15 | 26707996  | 26708550  | - |
| 2811 | 1424163_at   | Region | 0610039K22Rik | 66089  | 11 | 51376514  | 51388737  | - |
| 2812 | 1447904_s_at | Region | Fnta          | 14272  | 8  | 24723471  | 24740350  | - |
| 2813 | 1421112_at   | Region | Nkx2-2        | 18088  | 2  | 146640088 | 146643295 | - |
| 2814 | 1458276_x_at | Region | Cit           | 12704  | 5  | 114963119 | 115127860 | + |
| 2815 | 1438765_at   | Region | Dhx33         | 216877 | 11 | 70709749  | 70730090  | - |
| 2816 | 1449256_a_at | Region | Rab11a        | 53869  | 9  | 64838434  | 64859957  | - |
| 2817 | 1434556_at   | Region | None          | None   | 13 | 41199263  | 41201470  | + |
| 2818 | 1426834_s_at | Region | D930015E06Rik | 229473 | 3  | 83635417  | 83777077  | - |
| 2819 | 1455912_x_at | Region | AW538196      | 101869 | 7  | 74125404  | 74140375  | - |
| 2820 | 1422407_s_at | Region | Hras1         | 15461  | 7  | 135593335 | 135594927 | - |
| 2821 | 1434260_at   | Region | Fchsd2        | 207278 | 7  | 95215371  | 95390959  | + |
| 2822 | 1452703_at   | Region | 4631427C17Rik | 74340  | 6  | 29815630  | 29959406  | + |
| 2823 | 1448473_at   | Region | Bub3          | 12237  | 7  | 125876724 | 125888172 | + |
| 2824 | 1439064_at   | Region | BC030046      | 277154 | 14 | 50372196  | 50391628  | + |
| 2825 | 1441905_x_at | Region | None          | None   | 7  | 53758980  | 53759255  | - |
| 2826 | 1457984_at   | Region | Crh           | 12918  | 3  | 19034688  | 19036603  | - |
| 2827 | 1416699_at   | Region | 1110008F13Rik | 67388  | 2  | 156320097 | 156330528 | + |
| 2828 | 1424871_s_at | Region | 1500031H01Rik | 207740 | 16 | 4545094   | 4549646   | - |
| 2829 | 1434792_at   | Region | 2010320M18Rik | 72093  | 8  | 69932415  | 69933332  | + |
| 2830 | 1445597_s_at | Region | Hrasls3       | 225845 | 19 | 7271359   | 7299646   | + |
| 2831 | 1419428_a_at | Region | Gaa           | 14387  | 11 | 119089137 | 119106545 | + |
| 2832 | 1424674_at   | Region | Slc39a6       | 106957 | 18 | 24808377  | 24830068  | - |
| 2833 | 1419247_at   | Region | Rgs2          | 19735  | 1  | 143832060 | 143836212 | - |
| 2834 | 1443095_at   | Region | 9630019E01Rik | 319967 | 2  | 145754156 | 145754838 | - |
| 2835 | 1442336_at   | Region | None          | None   | 15 | 77878885  | 77879146  | - |
| 2836 | 1434111_at   | Region | Lphn2         | 99633  | 3  | 147794533 | 14784904  | - |
| 2837 | 1434399_at   | Region | Galnt6        | 207839 | 15 | 100749352 | 100786914 | - |
| 2838 | 1421594_a_at | Region | Sytl2         | 83671  | 7  | 84398260  | 84460718  | + |
| 2839 | 1416825_at   | Region | Snta1         | 20648  | 2  | 153833265 | 153865018 | - |
| 2840 | 1435564_at   | Region | C230078M08Rik | 319749 | 17 | 24238307  | 24241147  | + |
| 2841 | 1457840_at   | Region | Plxna4        | 243743 | 6  | 32229575  | 32668174  | - |
| 2842 | 1415956_a_at | Region | Pctk1         | 18555  | X  | 18927433  | 18938817  | + |
| 2843 | 1426989_at   | Region | Clstn3        | 232370 | 6  | 125043444 | 125077134 | - |
| 2844 | 1428600_at   | Region | 3110068G20Rik | 73198  | 12 | 66843596  | 66845631  | - |
| 2845 | 1420617_at   | Region | Cpeb4         | 67579  | 11 | 31767001  | 31826367  | + |
| 2846 | 1460252_s_at | Region | Zfp105        | 22646  | 9  | 122940872 | 122948796 | + |
| 2847 | 1455095_at   | Region | Hist2h2be     | 319190 | 3  | 95756526  | 95756936  | + |
| 2848 | 1431285_at   | Region | Mgrn1         | 17237  | 16 | 4555925   | 4608181   | + |
| 2849 | 1448140_at   | Region | Ciapin1       | 109006 | 8  | 94106719  | 94122472  | - |
| 2850 | 1448554_s_at | Region | Myh6          | 17888  | 14 | 49458413  | 49483066  | - |
| 2851 | 1451775_s_at | Region | Il13ra1       | 16164  | X  | 30732693  | 30791816  | + |
| 2852 | 1439056_at   | Region | None          | None   | 12 | 23694008  | 23694667  | - |
| 2853 | 1450918_s_at | Region | None          | None   | 2  | 156914044 | 156928808 | + |
| 2854 | 1441102_at   | Region | AI987712      | 105935 | 15 | 10150000  | 10151138  | + |
| 2855 | 1434256_s_at | Region | Cds2          | 110911 | 2  | 131777151 | 131821546 | + |

|      |              |        |               |        |      |           |           |      |
|------|--------------|--------|---------------|--------|------|-----------|-----------|------|
| 2856 | 1418277_at   | Region | Rp9h          | 55934  | 9    | 22338723  | 22358719  | -    |
| 2857 | 1460201_a_at | Region | Rpl24         | 68193  | 16   | 54862320  | 54867361  | +    |
| 2858 | 1433915_s_at | Region | Epn2          | 13855  | 11   | 61242891  | 61305293  | -    |
| 2859 | 1415701_x_at | Region | Rpl23         | 65019  | 11   | 97598630  | 97603460  | -    |
| 2860 | 1433825_at   | Region | Ntrk3         | 18213  | 7    | 71981888  | 72367304  | -    |
| 2861 | 1421118_a_at | Region | Gpr56         | 14766  | 8    | 94268775  | 94298363  | +    |
| 2862 | 1443365_at   | Region | None          | None   | 18   | 62695990  | 62696617  | +    |
| 2863 | 1449945_at   | Region | Ppargc1b      | 170826 | 18   | 61523462  | 61625757  | -    |
| 2864 | 1421834_at   | Region | Pip5k1a       | 18719  | 19   | 23533932  | 23683715  | -    |
| 2865 | 1445475_at   | Region | Pak6          | 214230 | 2    | 118177426 | 118211869 | +    |
| 2866 | 1449862_a_at | Region | Pi4k2b        | 67073  | 5    | 51551747  | 51579476  | +    |
| 2867 | 1417929_at   | Region | Slc7a8        | 50934  | 14   | 49239052  | 49298723  | -    |
| 2868 | 1454974_at   | Region | Ntn1          | 18208  | 11   | 67938664  | 68111778  | -    |
| 2869 | 1421821_at   | Region | Ldlr          | 16835  | 9    | 21613867  | 21637395  | +    |
| 2870 | 1444372_at   | Region | None          | None   | NONE | NONE      | NONE      | NONE |
| 2871 | 1453135_at   | Region | Fndc5         | 384061 | 4    | 128164173 | 128171706 | +    |
| 2872 | 1428775_at   | Region | 1110008L16Rik | 66132  | 12   | 52024382  | 52103104  | +    |
| 2873 | 1459238_at   | Region | None          | None   | 10   | 53587679  | 53588234  | -    |
| 2874 | 1439926_at   | Region | 4632417D23    | 245843 | 16   | 32492548  | 32530995  | +    |
| 2875 | 1415998_at   | Region | Vdac1         | 22333  | 11   | 52127140  | 52142237  | +    |
| 2876 | 1416442_at   | Region | Ier2          | 15936  | 8    | 83924268  | 83927565  | -    |
| 2877 | 1441020_at   | Region | None          | None   | NONE | NONE      | NONE      | NONE |
| 2878 | 1424682_at   | Region | D5Erd708e     | 68080  | 5    | 121524856 | 121535121 | +    |
| 2879 | 1417106_at   | Region | Tpd52l2       | 66314  | 2    | 181214210 | 181233714 | +    |
| 2880 | 1455509_at   | Region | LOC192950     | 192950 | 11   | 6492611   | 6500842   | -    |
| 2881 | 1444663_at   | Region | Vezf1         | 22344  | 11   | 87796271  | 87812715  | +    |
| 2882 | 1438075_at   | Region | Fem1c         | 240263 | 18   | 46726362  | 46747727  | -    |
| 2883 | 1452812_at   | Region | Lphn1         | 330814 | 8    | 83175087  | 83200065  | +    |
| 2884 | 1423584_at   | Region | Igfbp7        | 29817  | 5    | 76593491  | 76652290  | -    |
| 2885 | 1430143_at   | Region | None          | None   | 18   | 21872751  | 21877294  | +    |
| 2886 | 1426751_s_at | Region | Nup107        | 103468 | 10   | 117441635 | 117483697 | -    |
| 2887 | 1460679_at   | Region | Exosc4        | 109075 | 15   | 76375587  | 76378860  | +    |
| 2888 | 1415877_at   | Region | Dpysl3        | 22240  | 18   | 43544269  | 43613318  | -    |
| 2889 | 1448717_at   | Region | Gcdh          | 270076 | 8    | 84153759  | 84160870  | -    |
| 2890 | 1415923_at   | Region | Ndn           | 17984  | 7    | 56122085  | 56123665  | +    |
| 2891 | 1423860_at   | Region | Ptgds         | 19215  | 2    | 25398874  | 25401893  | -    |
| 2892 | 1433716_x_at | Region | None          | None   | 14   | 65294915  | 65295355  | +    |
| 2893 | 1427314_at   | Region | Tmed7         | 66676  | 18   | 46809246  | 46819270  | -    |
| 2894 | 1423570_at   | Region | Abcg1         | 11307  | 17   | 28870974  | 28929775  | +    |
| 2895 | 1417795_at   | Region | Chl1          | 12661  | 6    | 103991578 | 104209457 | +    |
| 2896 | 1455022_at   | Region | Strn          | 268980 | 17   | 76477464  | 76558724  | -    |
| 2897 | 1436910_at   | Region | Rasal2        | 226525 | 1    | 157043874 | 157318163 | -    |
| 2898 | 1417772_at   | Region | Grhpr         | 76238  | 4    | 44897333  | 44906618  | +    |
| 2899 | 1438355_at   | Region | None          | None   | 12   | 81546738  | 81547166  | -    |
| 2900 | 1452921_at   | Region | B130050I23Rik | 213027 | 8    | 3521545   | 3563004   | +    |
| 2901 | 1443609_s_at | Region | Syvn1         | 74126  | 19   | 5835452   | 5842499   | +    |
| 2902 | 1434338_at   | Region | 1110029E03Rik | 242406 | 4    | 43494851  | 43503409  | +    |
| 2903 | 1449094_at   | Region | Gja7          | 14615  | 11   | 102620668 | 102625730 | -    |
| 2904 | 1415948_at   | Region | Creg1         | 433375 | 1    | 165685557 | 165697081 | +    |
| 2905 | 1423820_at   | Region | Elof1         | 66126  | 9    | 22004130  | 22005310  | -    |
| 2906 | 1439652_at   | Region | 9930033H14Rik | 217351 | 11   | 117475908 | 117583657 | +    |
| 2907 | 1448979_at   | Region | Muted         | 17828  | 13   | 38143450  | 38175853  | -    |
| 2908 | 1436416_x_at | Region | Fxc1          | 14356  | 7    | 99755452  | 99756758  | +    |
| 2909 | 1441556_at   | Region | None          | None   | 2    | 59977478  | 59978140  | -    |
| 2910 | 1455218_at   | Region | 6330503K22Rik | 101565 | 7    | 112588468 | 112612876 | +    |
| 2911 | 1438958_x_at | Region | Fkbp1a        | 14225  | 2    | 150999557 | 151018627 | +    |
| 2912 | 1434091_at   | Region | Faah          | 14073  | 4    | 114955573 | 114976807 | -    |
| 2913 | 1423107_at   | Region | Ube2b         | 22210  | 11   | 51738403  | 51753228  | -    |
| 2914 | 1434735_at   | Region | Hlf           | 221082 | 11   | 90159652  | 90211982  | -    |
| 2915 | 1433965_at   | Region | Atp8a1        | 11980  | 5    | 66388740  | 66614923  | -    |
| 2916 | 1423844_s_at | Region | Cbs           | 12411  | 17   | 29420528  | 29445025  | -    |
| 2917 | 1448682_at   | Region | Dncl1         | 56455  | 5    | 114408049 | 114410560 | -    |
| 2918 | 1423349_at   | Region | Socs5         | 56468  | 17   | 84964483  | 84994389  | +    |
| 2919 | 1456872_a_at | Region | D230010M03Rik | 241547 | 2    | 91415666  | 91420179  | +    |
| 2920 | 1450311_at   | Region | Slc8a3        | 110893 | 12   | 78060702  | 78194436  | -    |

|      |              |        |               |        |    |           |           |   |
|------|--------------|--------|---------------|--------|----|-----------|-----------|---|
| 2921 | 1431931_a_at | Region | Rabl2a        | 68708  | 15 | 89635410  | 89644738  | - |
| 2922 | 1439021_at   | Region | Centb5        | 140500 | 4  | 154384237 | 154399613 | + |
| 2923 | 1416166_a_at | Region | Prdx4         | 53381  | X  | 148950069 | 148964603 | - |
| 2924 | 1431326_a_at | Region | Tmod2         | 50876  | 9  | 75710299  | 75748747  | - |
| 2925 | 1436250_at   | Region | 5430405G05Rik | 108832 | 2  | 151159247 | 151169095 | + |
| 2926 | 1435742_at   | Region | 1110034C04Rik | 68734  | 12 | 96484976  | 96528858  | - |
| 2927 | 1451148_at   | Region | Pink1         | 68943  | 4  | 137194673 | 137207532 | - |
| 2928 | 1423608_at   | Region | Itn2a         | 16431  | X  | 101998560 | 102004725 | - |
| 2929 | 1456756_at   | Region | E430016P22Rik | 320578 | 6  | 38423603  | 38424937  | - |
| 2930 | 1436614_at   | Region | Al843639      | 106945 | 18 | 56995517  | 56995932  | - |
| 2931 | 1448743_at   | Region | Ssx2ip        | 99167  | 3  | 145381238 | 145416690 | + |
| 2932 | 1434617_x_at | Region | 1810073N04Rik | 72055  | 11 | 119925064 | 119972367 | - |
| 2933 | 1447773_x_at | Region | 6330409D20Rik | 70730  | 2  | 32664800  | 32665040  | - |
| 2934 | 1423082_at   | Region | Derl1         | 67819  | 15 | 57878521  | 57901434  | - |
| 2935 | 1435875_at   | Region | Prkab2        | 108097 | 3  | 97153614  | 97159355  | + |
| 2936 | 1449343_s_at | Region | Sin3a         | 20466  | 9  | 57189858  | 57241642  | + |
| 2937 | 1417632_at   | Region | Atp6v0a1      | 11975  | 11 | 100830569 | 100884801 | + |
| 2938 | 1417710_at   | Region | 0610012D09Rik | 59052  | 7  | 114910012 | 114952402 | + |
| 2939 | 1434211_at   | Region | Sh3bgrl2      | 212531 | 9  | 83878025  | 83930061  | + |
| 2940 | 1435862_at   | Region | Son           | 20658  | 16 | 90805044  | 90836353  | + |
| 2941 | 1460732_a_at | Region | Ppl           | 19041  | 16 | 4756515   | 4802113   | - |
| 2942 | 1455001_x_at | Region | Rpl13a        | 22121  | 7  | 39202318  | 39205277  | - |
| 2943 | 1445543_at   | Region | 9830124H08Rik | 219105 | 14 | 51315574  | 51334091  | - |
| 2944 | 1418459_at   | Region | 1810060J02Rik | 67015  | 6  | 148405067 | 148561800 | + |
| 2945 | 1418168_at   | Region | Zcchc14       | 142682 | 8  | 120981449 | 121033085 | - |
| 2946 | 1437675_at   | Region | Slc8a1        | 20541  | 17 | 79218202  | 79483338  | - |
| 2947 | 1451573_a_at | Region | Stx4a         | 20909  | 7  | 121891618 | 121898789 | + |
| 2948 | 1423945_a_at | Region | Pkig          | 18769  | 2  | 163150999 | 163183121 | + |
| 2949 | 1435060_at   | Region | Tmod2         | 50876  | 9  | 75710299  | 75748747  | - |
| 2950 | 1416219_at   | Region | Rpl19         | 19921  | 11 | 97848073  | 97851564  | + |
| 2951 | 1428622_at   | Region | Depdc6        | 97998  | 15 | 55114270  | 55254734  | + |
| 2952 | 1449979_a_at | Region | Spock3        | 72902  | 8  | 62017573  | 62420359  | + |
| 2953 | 1434788_at   | Region | D930050A07Rik | 320969 | 14 | 59719321  | 59720106  | - |
| 2954 | 1443528_at   | Region | C330008L01Rik | 106763 | 17 | 43951697  | 43953616  | - |
| 2955 | 1435325_at   | Region | Usp46         | 69727  | 5  | 72834085  | 72900782  | - |
| 2956 | 1450730_at   | Region | Hs2st1        | 23908  | 3  | 143402785 | 143541813 | - |
| 2957 | 1417635_at   | Region | Spa17         | 20686  | 9  | 37544795  | 37555111  | - |
| 2958 | 1428162_at   | Region | 4933421E11Rik | 321000 | 3  | 106517510 | 106530210 | + |
| 2959 | 1419159_at   | Region | Golga3        | 269682 | 5  | 109227485 | 109273939 | + |
| 2960 | 1428275_at   | Region | 1110065L07Rik | 68904  | 8  | 9345221   | 9357725   | + |
| 2961 | 1429194_at   | Region | Tigd2         | 68140  | 6  | 59454555  | 59457413  | + |
| 2962 | 1421955_a_at | Region | Nedd4         | 17999  | 9  | 72794997  | 72882331  | + |
| 2963 | 1452453_a_at | Region | Camk2a        | 12322  | 18 | 61150958  | 61213470  | + |
| 2964 | 1455300_at   | Region | E130014J05Rik | 214133 | 3  | 132356252 | 132362213 | - |
| 2965 | 1455515_at   | Region | 1810041L15Rik | 72301  | 15 | 84428627  | 84495696  | - |
| 2966 | 1443410_at   | Region | Grm5          | 108071 | 7  | 81779037  | 82108756  | + |
| 2967 | 1440969_at   | Region | BC030308      | 407797 | 2  | 78625033  | 78626542  | + |
| 2968 | 1425143_a_at | Region | Ndufs1        | 227197 | 1  | 63436616  | 63469727  | - |
| 2969 | 1419054_a_at | Region | Ptpn21        | 24000  | 12 | 94103584  | 94161513  | - |
| 2970 | 1454900_s_at | Region | Phr1          | 105689 | 14 | 97658865  | 97891435  | - |
| 2971 | 1420484_a_at | Region | Vtn           | 22370  | 11 | 78224945  | 78227983  | + |
| 2972 | 1439753_x_at | Region | Six4          | 20474  | 12 | 69946438  | 69959424  | - |
| 2973 | 1416109_at   | Region | Fuca1         | 71665  | 4  | 134802014 | 134821570 | + |
| 2974 | 1460310_a_at | Region | Gh            | 14599  | 11 | 106121357 | 106122899 | - |
| 2975 | 1436718_at   | Region | Nxph1         | 18231  | 6  | 8916972   | 9216425   | + |
| 2976 | 1430388_a_at | Region | Sulf2         | 72043  | 2  | 165530889 | 165612339 | - |
| 2977 | 1423508_at   | Region | Myst4         | 54169  | 14 | 19864536  | 20036801  | + |
| 2978 | 1449192_at   | Region | Atf7ip        | 54343  | 6  | 137280522 | 137369083 | + |
| 2979 | 1423270_at   | Region | Nedd4l        | 83814  | 18 | 65256461  | 65446324  | + |
| 2980 | 1456125_a_at | Region | Dncl1         | 56455  | 5  | 114408049 | 114410560 | - |
| 2981 | 1428408_a_at | Region | D12Ertd551e   | 52635  | 12 | 112044347 | 112136958 | + |
| 2982 | 1416046_a_at | Region | Fuca2         | 66848  | 10 | 13382818  | 13399065  | + |
| 2983 | 1455485_x_at | Region | Rpl13a        | 22121  | 7  | 39202318  | 39205277  | - |
| 2984 | 1435392_at   | Region | Wdr17         | 244484 | 8  | 53596923  | 53685958  | - |
| 2985 | 1442062_at   | Region | 7120426M23Rik | 319898 | 18 | 76543653  | 76545947  | + |

|      |              |        |               |        |      |           |           |      |
|------|--------------|--------|---------------|--------|------|-----------|-----------|------|
| 2986 | 1445479_at   | Region | None          | None   | 17   | 43963417  | 43964026  | -    |
| 2987 | 1426998_at   | Region | Tex27         | 21769  | 17   | 27815127  | 28020060  | +    |
| 2988 | 1440358_at   | Region | Arhgef15      | 442801 | 11   | 68673890  | 68677832  | -    |
| 2989 | 1459563_x_at | Region | None          | None   | NONE | NONE      | NONE      | NONE |
| 2990 | 1418450_at   | Region | Islr          | 26968  | 9    | 58270295  | 58273168  | -    |
| 2991 | 1433933_s_at | Region | Slco2b1       | 101488 | 7    | 93746839  | 93800194  | -    |
| 2992 | 1425405_a_at | Region | Adar          | 56417  | 3    | 89536967  | 89557589  | +    |
| 2993 | 1419651_at   | Region | 2610200G18Rik | 67149  | NONE | NONE      | NONE      | NONE |
| 2994 | 1450992_a_at | Region | Meis1         | 17268  | 11   | 18775221  | 18913473  | -    |
| 2995 | 1451913_a_at | Region | Hyou1         | 12282  | 9    | 44368440  | 44381225  | +    |
| 2996 | 1429526_at   | Region | Brd8          | 78656  | 18   | 34822848  | 34847583  | -    |
| 2997 | 1426111_x_at | Region | Irf3          | 54131  | 7    | 39074202  | 39079390  | +    |
| 2998 | 1437461_s_at | Region | Rnpc3         | 67225  | 3    | 14547     | 39217     | +    |
| 2999 | 1437147_at   | Region | Gabrg2        | 14406  | 11   | 41664694  | 41753515  | -    |
| 3000 | 1419155_a_at | Region | Sox4          | 20677  | 13   | 28430338  | 28433304  | -    |
| 3001 | 1436137_at   | Region | Slc6a17       | 229706 | 3    | 107263377 | 107313847 | -    |
| 3002 | 1435337_at   | Region | Zfp537        | 243931 | 7    | 31861436  | 31936775  | +    |
| 3003 | 1458161_at   | Region | Kcnq1ot1      | 63830  | 7    | 137694289 | 137694834 | -    |
| 3004 | 1427107_at   | Region | Slc16a11      | 216867 | 11   | 69939738  | 69942071  | +    |
| 3005 | 1423603_at   | Region | Zfpm1         | 22761  | 8    | 121663726 | 121718834 | +    |
| 3006 | 1429265_a_at | Region | Rnf130        | 59044  | 11   | 49778172  | 49857576  | +    |
| 3007 | 1416902_a_at | Region | Cox5b         | 12859  | 1    | 36986129  | 36987976  | +    |
| 3008 | 1424646_at   | Region | Uckl1         | 68556  | 2    | 181286109 | 181298930 | -    |
| 3009 | 1424122_s_at | Region | Commd1        | 17846  | 11   | 22794554  | 22873786  | -    |
| 3010 | 1460511_at   | Region | Pkp2          | 67451  | 16   | 14981080  | 15040447  | +    |
| 3011 | 1436034_at   | Region | Rab1          | 19324  | 11   | 20096395  | 20121649  | +    |
| 3012 | 1416086_at   | Region | Tpst2         | 22022  | 5    | 111346715 | 111385345 | +    |
| 3013 | 1439413_x_at | Region | Morf4l2       | 56397  | X    | 130277881 | 130286548 | -    |
| 3014 | 1423831_at   | Region | Prkag2        | 108099 | 5    | 23326651  | 23569979  | -    |
| 3015 | 1425104_at   | Region | Kctd1         | 106931 | 18   | 15156946  | 15339485  | -    |
| 3016 | 1450269_a_at | Region | Pfkl          | 18641  | 10   | 78096466  | 78119117  | -    |
| 3017 | 1451073_at   | Region | Sppl3         | 74585  | 5    | 114120890 | 114208417 | +    |
| 3018 | 1426318_at   | Region | Serpinb1b     | 282663 | 13   | 32563792  | 32573934  | +    |
| 3019 | 1438006_at   | Region | 4933439F18Rik | 66771  | 11   | 60142945  | 60170919  | +    |
| 3020 | 1436348_at   | Region | None          | None   | 8    | 124192769 | 124193828 | +    |
| 3021 | 1434794_at   | Region | Rhof          | 23912  | 5    | 122256437 | 122285538 | -    |
| 3022 | 1439805_at   | Region | Nfat5         | 54446  | 8    | 106591549 | 106677210 | +    |
| 3023 | 1448942_at   | Region | Gng11         | 66066  | 6    | 3956635   | 3961093   | +    |
| 3024 | 1450264_a_at | Region | Chka          | 12660  | 19   | 3640704   | 3683157   | +    |
| 3025 | 1450798_at   | Region | Tnxb          | 81877  | 17   | 32373858  | 32423088  | +    |
| 3026 | 1424544_at   | Region | Nrbp2         | 223649 | 15   | 76134266  | 76138685  | -    |
| 3027 | 1433528_at   | Region | Gtf2a2        | 235459 | 9    | 70143470  | 70153708  | +    |
| 3028 | 1435089_at   | Region | 2010111I01Rik | 72061  | 13   | 60400470  | 60681842  | +    |
| 3029 | 1423074_at   | Region | Lman2         | 66890  | 13   | 53952542  | 53972056  | -    |
| 3030 | 1427981_a_at | Region | Csad          | 246277 | 15   | 102236358 | 102248403 | -    |
| 3031 | 1424470_a_at | Region | Rapef3        | 223864 | 15   | 97820598  | 97843317  | -    |
| 3032 | 1455472_at   | Region | A630071D13Rik | 103300 | NONE | NONE      | NONE      | NONE |
| 3033 | 1421202_at   | Region | Chrna4        | 11438  | 2    | 180739269 | 180756135 | -    |
| 3034 | 1453422_a_at | Region | 1110020G09Rik | 68646  | 15   | 8873106   | 8912017   | +    |
| 3035 | 1416462_at   | Region | Gpiap1        | 53872  | 2    | 103469773 | 103502351 | -    |
| 3036 | 1448162_at   | Region | Vcam1         | 22329  | 3    | 114880536 | 114900204 | -    |
| 3037 | 1449127_at   | Region | Selpl         | 20345  | 5    | 112929691 | 112941077 | -    |
| 3038 | 1448112_at   | Region | Cox7c         | 12867  | 13   | 82151364  | 82153299  | -    |
| 3039 | 1455273_at   | Region | Zfp482        | 241322 | 2    | 37359545  | 37375333  | -    |
| 3040 | 1422613_a_at | Region | Rpl7a         | 27176  | 9    | 26842969  | 26845473  | +    |
| 3041 | 1428516_a_at | Region | Spata11       | 66400  | 17   | 54687275  | 54689244  | +    |
| 3042 | 1427020_at   | Region | Scara3        | 219151 | 14   | 60446815  | 60481164  | -    |
| 3043 | 1426966_at   | Region | Axin1         | 12005  | 17   | 23931904  | 23988981  | +    |
| 3044 | 1445517_at   | Region | Jmy           | 57748  | 13   | 89619364  | 89683698  | -    |
| 3045 | 1440429_at   | Region | MGI:107562    | 74100  | 9    | 112222231 | 112229149 | -    |
| 3046 | 1435281_at   | Region | Cpt1c         | 78070  | 7    | 39035915  | 39051316  | -    |
| 3047 | 1429461_at   | Region | 2810417D08Rik | 70422  | 11   | 85940080  | 85985336  | -    |
| 3048 | 1426663_s_at | Region | Pcanap6       | 212980 | 1    | 131822427 | 131834782 | +    |
| 3049 | 1450840_a_at | Region | Rpl39         | 67248  | X    | 31703074  | 31705738  | -    |
| 3050 | 1458263_at   | Region | Cugbp2        | 14007  | 2    | 6459141   | 6638885   | -    |



|      |              |        |               |        |    |           |           |   |
|------|--------------|--------|---------------|--------|----|-----------|-----------|---|
| 3051 | 1435880_at   | Region | E430012K20Rik | 99696  | 3  | 37921264  | 37950389  | - |
| 3052 | 1452193_a_at | Region | Wasl          | 73178  | 6  | 24663290  | 24714456  | - |
| 3053 | 1440120_at   | Region | Gnb2-rs1      | 14694  | 11 | 48553197  | 48559078  | + |
| 3054 | 1458524_at   | Region | Fndc3a        | 319448 | 14 | 66891442  | 67062343  | - |
| 3055 | 1455699_at   | Region | None          | None   | 6  | 145840270 | 145841280 | - |
| 3056 | 1436395_at   | Region | Card6         | 239319 | 15 | 4883018   | 4894105   | - |
| 3057 | 1451120_at   | Region | Rpo1-3        | 20018  | 5  | 145969234 | 146003052 | + |
| 3058 | 1455363_at   | Region | Bai1          | 107831 | 15 | 74548346  | 74620885  | + |
| 3059 | 1439940_at   | Region | 2900019G14Rik | 72932  | 2  | 102488249 | 102488895 | + |
| 3060 | 1417807_at   | Region | 2700038N03Rik | 70240  | 5  | 136245535 | 136246530 | + |
| 3061 | 1449020_at   | Region | Plscr3        | 70310  | 11 | 69572334  | 69577716  | + |
| 3062 | 1451983_at   | Region | Irx1          | 16371  | 13 | 68009760  | 68014632  | - |
| 3063 | 1429198_at   | Region | 1810030O07Rik | 69155  | X  | 10893824  | 10912486  | - |
| 3064 | 1454716_x_at | Region | Cox5b         | 12859  | 1  | 36986129  | 36987976  | + |
| 3065 | 1441403_at   | Region | Till4         | 67534  | 1  | 74978679  | 74979358  | + |
| 3066 | 1435881_at   | Region | Pcbp2         | 18521  | 15 | 102531206 | 102559300 | + |
| 3067 | 1429515_at   | Region | Ubr2          | 224826 | 17 | 44441356  | 44523334  | - |
| 3068 | 1438047_at   | Region | C130073D16Rik | 269800 | 6  | 125665749 | 125688791 | + |
| 3069 | 1426524_at   | Region | Gnpda2        | 67980  | 5  | 68341941  | 68359622  | - |
| 3070 | 1426558_x_at | Region | 3100002L24Rik | 66376  | 2  | 175129264 | 175144107 | - |
| 3071 | 1428387_at   | Region | Acsl3         | 74205  | 1  | 78992139  | 79040786  | + |
| 3072 | 1450150_a_at | Region | Rpl13         | 270106 | 8  | 122483697 | 122486521 | + |
| 3073 | 1457477_at   | Region | Mbnl2         | 105559 | 14 | 114846670 | 115003029 | + |
| 3074 | 1460735_at   | Region | Svil          | 225115 | 18 | 4925311   | 5124034   | + |
| 3075 | 1443086_at   | Region | Alcam         | 11658  | 16 | 51168811  | 51372049  | - |
| 3076 | 1428935_at   | Region | Canx          | 12330  | 11 | 50047308  | 50078432  | - |
| 3077 | 1437679_a_at | Region | Glrx2         | 69367  | 1  | 143571711 | 143578676 | + |
| 3078 | 1422169_a_at | Region | Bdnf          | 12064  | 2  | 109298487 | 109350793 | + |
| 3079 | 1448206_at   | Region | Psma2         | 19166  | 13 | 14057818  | 14070140  | + |
| 3080 | 1448318_at   | Region | Adfp          | 11520  | 4  | 85642758  | 85656186  | - |
| 3081 | 1448678_at   | Region | 3110048E14Rik | 73225  | 15 | 85085724  | 85111429  | + |
| 3082 | 1421435_at   | Region | Grid2         | 14804  | 6  | 64146694  | 64904112  | + |
| 3083 | 1429900_at   | Region | 5330406M23Rik | 76671  | 6  | 31148801  | 31150468  | - |
| 3084 | 1423197_a_at | Region | AW011752      | 104570 | 11 | 29067786  | 29113926  | + |
| 3085 | 1428344_at   | Region | 4932443D16Rik | 74411  | 19 | 28216517  | 28219402  | + |
| 3086 | 1433435_at   | Region | AW551984      | 244810 | 9  | 39530212  | 39546940  | - |
| 3087 | 1425898_x_at | Region | Olfm3         | 229759 | 3  | 113850919 | 113895474 | + |
| 3088 | 1419445_s_at | Region | Sap18         | 20220  | 14 | 52333126  | 52339849  | + |
| 3089 | 1436140_at   | Region | 1700027J05Rik | 69440  | 15 | 89237134  | 89248812  | - |
| 3090 | 1449010_at   | Region | Hspa4l        | 18415  | 3  | 40165310  | 40210062  | + |
| 3091 | 1455313_at   | Region | Abli2         | 231148 | 5  | 34245478  | 34371978  | + |
| 3092 | 1455122_at   | Region | Ptchd2 ///    |        |    |           |           |   |
| 3092 | 1455122_at   | Region | LOC545719     | 242748 | 4  | 146732885 | 146735266 | - |
| 3093 | 1431059_x_at | Region | Htatsf1       | 72459  | X  | 51808329  | 51821897  | + |
| 3094 | 1416481_s_at | Region | MGI:1930666   | 56295  | 9  | 121862188 | 121871251 | - |
| 3095 | 1451902_at   | Region | BC021442      | 224598 | 17 | 20282140  | 20297899  | - |
| 3096 | 1442177_at   | Region | Slc6a5        | 104245 | 7  | 44024879  | 44077972  | + |
| 3097 | 1422616_s_at | Region | Wdr54         | 75659  | 6  | 83496437  | 83500056  | - |
| 3098 | 1422852_at   | Region | Cib2          | 56506  | 9  | 54657936  | 54673669  | - |
| 3099 | 1437787_at   | Region | None          | None   | 18 | 35432995  | 35434650  | - |
| 3100 | 1455701_at   | Region | Snx26         | 233071 | 7  | 25934918  | 25947701  | - |
| 3101 | 1431057_a_at | Region | Prss23        | 76453  | 7  | 83485290  | 83495057  | - |
| 3102 | 1438566_at   | Region | None          | None   | 2  | 13567269  | 13568387  | - |
| 3103 | 1418773_at   | Region | Fads3         | 60527  | 19 | 9238187   | 9256168   | + |
| 3104 | 1452414_s_at | Region | D19Ert678e    | 108673 | 19 | 10139228  | 10145763  | - |
| 3105 | 1439732_at   | Region | None          | None   | 15 | 4363268   | 4363829   | + |
| 3106 | 1446618_at   | Region | LOC432971     | 432971 | 15 | 85728839  | 85729479  | + |
| 3107 | 1421847_at   | Region | Wsb2          | 59043  | 5  | 116486085 | 116507368 | + |
| 3108 | 1452619_a_at | Region | Agbl3         | 76223  | 6  | 34875137  | 34899893  | + |
| 3109 | 1419753_at   | Region | Nfx1          | 74164  | 4  | 41109832  | 41164029  | + |
| 3110 | 1425149_a_at | Region | Pdcl          | 67466  | 2  | 37282236  | 37291394  | - |
| 3111 | 1448029_at   | Region | Tbx3          | 21386  | 5  | 118821012 | 118834673 | + |
| 3112 | 1434075_at   | Region | BC030336      | 233812 | 7  | 114553247 | 114606821 | + |
| 3113 | 1415910_s_at | Region | Ciapi1        | 109006 | 8  | 94106719  | 94122472  | - |
| 3114 | 1427192_a_at | Region | Brd8          | 78656  | 18 | 34822848  | 34847583  | - |

|      |              |        |                   |        |    |           |           |   |
|------|--------------|--------|-------------------|--------|----|-----------|-----------|---|
| 3115 | 1428585_at   | Region | Actn1             | 109711 | 12 | 77028440  | 77032905  | - |
| 3116 | 1453222_at   | Region | Gse1              | 382034 | 8  | 119846048 | 119938723 | + |
| 3117 | 1455646_at   | Region | 2010004M13Rik     | 76511  | 7  | 30902316  | 30902970  | + |
| 3118 | 1452021_a_at | Region | Hes6              | 55927  | 1  | 91234525  | 91236264  | - |
| 3119 | 1442138_at   | Region | Gpr62             | 436090 | 9  | 106528967 | 106532763 | - |
| 3120 | 1434468_at   | Region | D8Ertd69e         | 73945  | 8  | 78854651  | 78892469  | + |
| 3121 | 1424634_at   | Region | Tceal1            | 237052 | X  | 130253004 | 130254807 | + |
| 3122 | 1450985_a_at | Region | Tjp2              | 21873  | 19 | 23332679  | 23411932  | - |
| 3123 | 1456220_at   | Region | Fbxl7             | 448987 | 15 | 26529709  | 26530364  | - |
| 3124 | 1427243_at   | Region | AA536743          | 100532 | 5  | 62707529  | 62766865  | - |
| 3125 | 1443989_at   | Region | Trim9             | 94090  | 12 | 67079894  | 67179488  | - |
| 3126 | 1424930_s_at | Region | MGC27770          | 213956 | 15 | 80724488  | 80753043  | + |
| 3127 | 1441531_at   | Region | Plcb4             | 18798  | 2  | 135319401 | 135526921 | + |
| 3128 | 1452245_at   | Region | G630039L02        | 268543 | 12 | 43459997  | 43567383  | - |
| 3129 | 1424467_at   | Region | Phldb1            | 102693 | 9  | 44675163  | 44724049  | - |
| 3130 | 1436569_at   | Region | C030045D06Rik     | 109294 | 1  | 11407410  | 11409217  | + |
| 3131 | 1452338_s_at | Region | Its1              | 16443  | 16 | 90939437  | 91069253  | + |
| 3132 | 1443128_at   | Region | Ddx26             | 18130  | 14 | 57209161  | 57294009  | - |
| 3133 | 1440619_at   | Region | Mapk8ip1          | 19099  | 2  | 92088363  | 92105946  | - |
| 3134 | 1431137_at   | Region | Rusc1             | 72296  | 3  | 88827845  | 88837154  | - |
| 3135 | 1432850_at   | Region | 5430434G16Rik     | 71385  | 15 | 36252623  | 36253976  | - |
| 3136 | 1433970_at   | Region | Bola3             | 78653  | 6  | 83693715  | 83702623  | + |
| 3137 | 1426604_at   | Region | Rnasel            | 24014  | 1  | 153637567 | 153646977 | + |
| 3138 | 1438322_x_at | Region | Fdft1             | 14137  | 14 | 57675741  | 57708384  | - |
| 3139 | 1420048_at   | Region | C78859            | 97455  | 8  | 93611773  | 93612171  | + |
| 3140 | 1435175_at   | Region | BC034090          | 207792 | 1  | 155103210 | 155123477 | - |
| 3141 | 1416435_at   | Region | Ltbr              | 17000  | 6  | 125963256 | 125970534 | - |
| 3142 | 1426399_at   | Region | Vwa1              | 246228 | 4  | 154260857 | 154266876 | - |
| 3143 | 1419829_a_at | Region | None              | None   | 7  | 91353590  | 91354371  | + |
| 3144 | 1451804_a_at | Region | Lrrc16            | 68732  | 13 | 23492536  | 23760672  | - |
| 3145 | 1434967_at   | Region | Zswim6            | 67263  | 13 | 103950578 | 104158812 | - |
| 3146 | 1453478_at   | Region | Pou3f2            | 18992  | 4  | 22556165  | 22557502  | - |
| 3147 | 1424828_a_at | Region | Fh1               | 14194  | 1  | 175534087 | 175558287 | - |
| 3148 | 1415716_a_at | Region | Rps27             | 57294  | 3  | 90023087  | 90024065  | - |
| 3149 | 1440206_at   | Region | A930024E05Rik     | 109202 | 5  | 122142263 | 122151248 | + |
| 3150 | 1445459_at   | Region | None              | None   | 17 | 23295726  | 23296342  | - |
| 3151 | 1433875_at   | Region | 4732418C07Rik     | 230648 | 4  | 114696978 | 114736232 | + |
| 3152 | 1420475_at   | Region | Mtpn              | 14489  | 6  | 35603109  | 35634015  | - |
| 3153 | 1454734_at   | Region | Lef1              | 16842  | 3  | 130040399 | 130153310 | + |
| 3154 | 1456523_at   | Region | None              | None   | 7  | 78431257  | 78432189  | + |
| 3155 | 1453479_at   | Region | 1700086P04Rik     | 67349  | 4  | 128077201 | 128085088 | - |
| 3156 | 1419452_at   | Region | Uchl5             | 56207  | 1  | 143609398 | 143638878 | + |
| 3157 | 1452583_s_at | Region | Galm              | 319625 | 17 | 77944865  | 78002426  | + |
| 3158 | 1427186_a_at | Region | Mef2a             | 17258  | 7  | 61121784  | 61125517  | - |
| 3159 | 1418132_a_at | Region | D7Wsu128e         | 28018  | 7  | 115945280 | 115956990 | + |
| 3160 | 1426997_at   | Region | Thra              | 21833  | 11 | 98562960  | 98586198  | + |
| 3161 | 1460196_at   | Region | Cbr1              | 12408  | 16 | 92774230  | 92776713  | + |
| 3162 | 1428351_at   | Region | Ppm1m             | 67905  | 9  | 106188548 | 106192870 | - |
| 3163 | 1435443_at   | Region | Eya3              | 14050  | 4  | 131599945 | 131685662 | + |
| 3164 | 1419045_at   | Region | Slc25a23          | 66972  | 17 | 54733419  | 54749804  | - |
| 3165 | 1459665_s_at | Region | Mvri1             | 17540  | 7  | 104721209 | 104835598 | - |
| 3166 | 1421449_at   | Region | Csmd1             | 94109  | 8  | 15273983  | 16089202  | - |
| 3167 | 1454874_at   | Region | Btbd7             | 238386 | 12 | 98231027  | 98324543  | - |
| 3168 | 1416082_at   | Region | Rab1              | 19324  | 11 | 20096395  | 20121649  | + |
| 3169 | 1423884_at   | Region | Tex292            | 21771  | 8  | 106196204 | 106220781 | + |
| 3170 | 1445642_at   | Region | Lemd1             | 213409 | 1  | 132045455 | 132110831 | + |
| 3171 | 1453299_a_at | Region | Pnp /// LOC545044 | 18950  | 14 | 46039165  | 46048052  | + |
| 3172 | 1439163_at   | Region | None              | None   | 9  | 48682062  | 48682773  | - |
| 3173 | 1431131_s_at | Region | A630007B06Rik     | 213993 | 19 | 56376334  | 56399260  | - |
| 3174 | 1443620_at   | Region | Gpc4              | 14735  | X  | 46573716  | 46686048  | - |
| 3175 | 1439316_at   | Region | Rnpc2             | 170791 | 2  | 155604575 | 155637077 | - |
| 3176 | 1416521_at   | Region | Sepw1             | 20364  | 7  | 4226      | 7136      | - |
| 3177 | 1450442_at   | Region | Add2              | 11519  | 6  | 86507734  | 86549220  | + |
| 3178 | 1422457_s_at | Region | Sumo3             | 20610  | 10 | 77717706  | 77728812  | + |

|                   |              |        |               |        |    |           |           |   |
|-------------------|--------------|--------|---------------|--------|----|-----------|-----------|---|
| 3179              | 1452140_at   | Region | Tbc1d20       | 67231  | 2  | 151750808 | 151769526 | + |
| 3180              | 1459749_s_at | Region | Fat4          | 329628 | 3  | 38357245  | 38481982  | + |
| 3181              | 1455624_at   | Region | None          | None   | 3  | 87972647  | 87973824  | + |
| 4930542G03Rik /// |              |        |               |        |    |           |           |   |
| 3182              | 1456078_x_at | Region | LOC433839     | 227613 | 2  | 25154324  | 25156803  | - |
| 3183              | 1424191_a_at | Region | Tmem41a       | 66664  | 16 | 20705838  | 20717737  | - |
| 3184              | 1429425_at   | Region | Rnf139        | 75841  | 15 | 58900098  | 58911654  | + |
| 3185              | 1449189_at   | Region | BC003266      | 80284  | 4  | 126270938 | 126274922 | + |
| 3186              | 1433023_at   | Region | 2310068G24Rik | 70185  | 12 | 78104714  | 78106328  | - |
| 3187              | 1421126_at   | Region | Ryr2          | 20191  | 13 | 11561136  | 11985749  | - |
| 3188              | 1428923_at   | Region | Ppp1r3g       | 76487  | 13 | 35482984  | 35505121  | + |
| 3189              | 1416415_a_at | Region | H2afz         | 51788  | 3  | 136753528 | 136755851 | + |
| 3190              | 1455073_at   | Region | Cdadc1        | 71891  | 14 | 54094451  | 54133002  | - |
| 3191              | 1435778_at   | Region | Ankrd11       | 77087  | 8  | 122264618 | 122423554 | - |
| 3192              | 1421961_a_at | Region | Dnajb5        | 56323  | 4  | 42869016  | 42874654  | + |
| 3193              | 1424561_at   | Region | Ece2          | 107522 | 16 | 19402051  | 19418060  | + |
| 3194              | 1440570_at   | Region | 6030443J06Rik | 320719 | 5  | 21269408  | 21270120  | + |
| 3195              | 1428182_at   | Region | Prpsap1       | 67763  | 11 | 116291939 | 116320020 | - |
| 3196              | 1426378_at   | Region | Eif4b         | 75705  | 15 | 102141346 | 102156533 | + |
| 3197              | 1449576_at   | Region | Eif1ay        | 66235  | X  | 152971635 | 152987226 | + |
| 3198              | 1447783_x_at | Region | D11Ertd333e   | 68066  | 11 | 102224234 | 102228559 | - |
| 3199              | 1434379_at   | Region | Mxd4          | 17122  | 5  | 32664918  | 32676048  | - |
| 3200              | 1442707_at   | Region | Camk2a        | 12322  | 18 | 61150958  | 61213470  | + |
| 3201              | 1454637_at   | Region | Klhl8         | 246293 | 5  | 102896841 | 102946020 | - |
| 3202              | 1428101_at   | Region | Rnf38         | 73469  | 4  | 44044581  | 44074976  | - |
| 3203              | 1452216_at   | Region | BC025519      | 223722 | 15 | 83595396  | 83604296  | - |
| 3204              | 1427057_at   | Region | C630002B14Rik | 103466 | 10 | 86809415  | 86813050  | + |
| 3205              | 1440439_at   | Region | None          | None   | 6  | 53156170  | 53156818  | - |
| 3206              | 1431114_at   | Region | Dock4         | 238130 | 12 | 37387382  | 37389875  | + |
| 3207              | 1460538_at   | Region | Cdh10         | 320873 | 15 | 18747204  | 18942493  | + |
| 3208              | 1425491_at   | Region | Bmpr1a        | 12166  | 14 | 32547251  | 32638735  | - |
| 3209              | 1441371_at   | Region | Plxna4        | 243743 | 6  | 32229575  | 32668174  | - |
| 3210              | 1440148_at   | Region | Gpr6          | 140741 | 10 | 41178103  | 41179194  | - |
| 3211              | 1444151_at   | Region | 2600009P04Rik | 66572  | 9  | 21938933  | 21939642  | - |
| 3212              | 1456705_at   | Region | Zfp532        | 328977 | 18 | 65813456  | 65922159  | + |
| 3213              | 1437192_x_at | Region | Vdac1         | 22333  | 11 | 52127140  | 52142237  | + |
| 3214              | 1416393_at   | Region | Grcc2f        | 14791  | 6  | 125359657 | 125367507 | - |
| 3215              | 1453569_s_at | Region | Mark4         | 232944 | 7  | 16295319  | 16327738  | - |
| 3216              | 1420838_at   | Region | Ntrk2         | 18212  | 13 | 57448390  | 57572946  | + |
| 3217              | 1426819_at   | Region | Hipk3         | 15259  | 2  | 104134518 | 104198998 | - |
| 3218              | 1429850_x_at | Region | 2010004B12Rik | 72041  | 5  | 135149640 | 135155104 | + |
| 3219              | 1435941_at   | Region | Rhbdl4        | 246104 | 11 | 80026735  | 80081614  | + |
| 3220              | 1450828_at   | Region | Synpo2        | 118449 | 3  | 121904047 | 121951604 | - |
| 3221              | 1439018_at   | Region | 6330505N24Rik | 229474 | 3  | 84187486  | 84222923  | - |
| 3222              | 1421936_at   | Region | Dapp1         | 26377  | 3  | 136820534 | 136870453 | - |
| 9130019O22Rik /// |              |        |               |        |    |           |           |   |
| E430018J23Rik /// |              |        |               |        |    |           |           |   |
| 8030466O12Rik /// |              |        |               |        |    |           |           |   |
| 3223              | 1451571_s_at | Region | 6430604K15Rik | 101604 | 7  | 121433485 | 121443350 | - |
| 3224              | 1441729_at   | Region | None          | None   | 2  | 33493127  | 33493634  | - |
| 3225              | 1458125_at   | Region | C80913        | 19777  | 7  | 33124913  | 33183548  | - |
| 3226              | 1437062_s_at | Region | Phyhipl       | 70911  | 10 | 70611653  | 70653244  | - |
| 3227              | 1416810_at   | Region | Mea1          | 17256  | 17 | 44191851  | 44193708  | + |
| 3228              | 1425134_a_at | Region | Pigx          | 72084  | 16 | 30893795  | 30909102  | - |
| 3229              | 1439990_at   | Region | None          | None   | 4  | 18051182  | 18052354  | + |
| 3230              | 1435465_at   | Region | 4930465M17Rik | 74901  | 8  | 14398719  | 14411815  | + |
| 3231              | 1439872_at   | Region | None          | None   | 3  | 106904004 | 106904655 | + |
| 3232              | 1434686_at   | Region | None          | None   | 3  | 54351100  | 54362983  | + |
| 3233              | 1436124_at   | Region | Pcyt1b        | 236899 | X  | 88315521  | 88410606  | + |
| 3234              | 1448476_at   | Region | Nap1l4        | 17955  | 7  | 137926598 | 137962109 | - |
| 3235              | 1456396_at   | Region | None          | None   | 14 | 52112615  | 52114074  | - |
| 3236              | 1438906_at   | Region | Tlk1          | 228012 | 2  | 70410150  | 70523223  | - |
| 3237              | 1442887_at   | Region | Al853363      | 98471  | 1  | 125702831 | 125703636 | - |
| 3238              | 1443522_s_at | Region | Phip          | 83946  | 9  | 83198955  | 83305205  | - |
| 3239              | 1456044_at   | Region | Nedd4l        | 83814  | 18 | 65256461  | 65446324  | + |

|      |              |        |                 |        |    |           |           |   |
|------|--------------|--------|-----------------|--------|----|-----------|-----------|---|
| 3240 | 1453120_at   | Region | D2Bwg1356e      | 52837  | 2  | 134108354 | 134157974 | - |
| 3241 | 1427670_a_at | Region | Tcf12           | 21406  | 9  | 71980605  | 72246476  | - |
| 3242 | 1454979_at   | Region | Diap1           | 13367  | 18 | 38068549  | 38159133  | - |
| 3243 | 1452979_at   | Region | 2610110G12Rik   | 73242  | 17 | 33619005  | 33629198  | - |
| 3244 | 1418401_a_at | Region | Dusp16          | 70686  | 6  | 135472936 | 135549943 | - |
| 3245 | 1454743_at   | Region | Nup205          | 70699  | 6  | 35271467  | 35341643  | + |
| 3246 | 1415732_at   | Region | Bat5            | 193742 | 17 | 32793071  | 32806767  | + |
| 3247 | 1433523_at   | Region | D930005D10Rik   | 231858 | 5  | 141492144 | 141552261 | - |
| 3248 | 1422650_a_at | Region | Riok3           | 66878  | 18 | 12316360  | 12344298  | + |
| 3249 | 1435248_a_at | Region | Btaf1           | 107182 | 19 | 36299109  | 36355422  | + |
| 3250 | 1426993_at   | Region | Xpr1            | 19775  | 1  | 155171522 | 155308066 | - |
| 3251 | 1451666_at   | Region | Acly            | 104112 | 11 | 100297443 | 100348988 | - |
| 3252 | 1429987_at   | Region | 9930013L23Rik   | 80982  | 7  | 77789128  | 77940416  | - |
| 3253 | 1448414_at   | Region | Rad1            | 19355  | 15 | 10300285  | 10307801  | + |
| 3254 | 1438799_at   | Region | MGI:2443217     | 320038 | 6  | 6792946   | 6834425   | - |
| 3255 | 1423895_a_at | Region | Cugbp2          | 14007  | 2  | 6459141   | 6638885   | - |
| 3256 | 1454987_a_at | Region | H2-Ke6          | 14979  | 17 | 31730089  | 31732207  | - |
| 3257 | 1450186_s_at | Region | Gnas            | 14683  | 2  | 173709228 | 173771651 | + |
| 3258 | 1442072_at   | Region | C230081A13Rik   | 244895 | 9  | 56336855  | 56527185  | - |
| 3259 | 1440374_at   | Region | Pde1c           | 18575  | 6  | 56226106  | 56506844  | - |
| 3260 | 1427943_at   | Region | Acyp2           | 75572  | 11 | 30400782  | 30544186  | - |
| 3261 | 1443843_x_at | Region | Rpl9            | 20005  | 5  | 64190194  | 64192821  | - |
| 3262 | 1415678_at   | Region | Ppm1a           | 19042  | 12 | 69630561  | 69641441  | + |
| 3263 | 1423418_at   | Region | Fdps            | 110196 | 3  | 88837452  | 88845809  | - |
| 3264 | 1439298_at   | Region | None            | None   | X  | 36604948  | 36605564  | + |
| 3265 | 1441558_at   | Region | D230044B12Rik   | 399635 | 15 | 80885229  | 80885833  | + |
| 3266 | 1422327_s_at | Region | G6pd2 /// G6pdx | 14380  | 5  | 60615551  | 60617092  | + |
| 3267 | 1459830_at   | Region | None            | None   | 7  | 23703122  | 23703299  | - |
| 3268 | 1431145_a_at | Region | Cuedc2          | 67116  | 19 | 45877886  | 45885966  | - |
| 3269 | 1418901_at   | Region | Cebpb           | 12608  | 2  | 167197648 | 167199151 | + |
| 3270 | 1415845_at   | Region | Syt4            | 20983  | 18 | 31677574  | 31687445  | - |
| 3271 | 1429266_at   | Region | Tmhs            | 328789 | 17 | 26377207  | 26385076  | + |
| 3272 | 1435221_at   | Region | Foxp1           | 108655 | 6  | 99395348  | 99630926  | - |
| 3273 | 1454074_a_at | Region | 1500011J06Rik   | 208606 | 5  | 122899619 | 122920601 | - |
| 3274 | 1417999_at   | Region | Itm2b           | 16432  | 14 | 67713666  | 67736706  | - |
| 3275 | 1434021_at   | Region | C230096C10Rik   | 230866 | 4  | 138233859 | 138259973 | + |
| 3276 | 1418687_at   | Region | Arc             | 11838  | 15 | 74700745  | 74704214  | - |
| 3277 | 1451893_s_at | Region | Magi1           | 14924  | 6  | 94131999  | 94737301  | - |
| 3278 | 1423763_x_at | Region | Rps28           | 54127  | 17 | 31521434  | 31522877  | - |
| 3279 | 1436200_at   | Region | Rnf127          | 74365  | X  | 30986683  | 30987411  | + |
| 3280 | 1436705_at   | Region | Tmem32          | 236792 | X  | 51340226  | 51352633  | - |
| 3281 | 1423976_at   | Region | 4930453N24Rik   | 67609  | 16 | 63789732  | 63795010  | - |
| 3282 | 1444250_at   | Region | None            | None   | 3  | 30240843  | 30241987  | + |
| 3283 | 1423843_at   | Region | BC027309        | 243371 | 6  | 48687831  | 48703601  | + |
| 3284 | 1424912_at   | Region | Slc25a17        | 20524  | 15 | 81369721  | 81411565  | - |
| 3285 | 1441166_at   | Region | A330050F15Rik   | 320722 | 17 | 67214915  | 67262703  | + |
| 3286 | 1450889_at   | Region | Smarca3         | 20585  | 3  | 19399088  | 19457883  | + |
| 3287 | 1429328_at   | Region | Nsfl1c          | 386649 | 2  | 150951244 | 150968241 | + |
| 3288 | 1438049_at   | Region | A430108E01Rik   | 384382 |    | 70218046  | 70219091  | + |
| 3289 | 1440263_at   | Region | Alkbh           | 211064 | 12 | 84553546  | 84554547  | + |
| 3290 | 1426796_at   | Region | Txln            | 109658 | 4  | 128653196 | 128667753 | - |
| 3291 | 1433472_x_at | Region | Rpl38           | 67671  | 11 | 114489617 | 114493424 | + |
| 3292 | 1451695_a_at | Region | Gpx4            | 14779  | 10 | 46036806  | 46037580  | + |
| 3293 | 1416786_at   | Region | Acvr1           | 11477  | 2  | 58371977  | 58441698  | - |
| 3294 | 1435893_at   | Region | Vldlr           | 22359  | 19 | 26457498  | 26489686  | + |
| 3295 | 1455860_at   | Region | Pigh            | 110417 | 12 | 75938752  | 75946053  | - |
| 3296 | 1449334_at   | Region | Timp3           | 21859  | 10 | 86261055  | 86310024  | + |
| 3297 | 1438456_at   | Region | H13             | 14950  | 2  | 152126435 | 152163760 | + |
| 3298 | 1448884_at   | Region | Gtf2e2          | 68153  | 8  | 32537643  | 32582765  | + |
| 3299 | 1423870_at   | Region | 2610208M17Rik   | 108909 | 8  | 3442132   | 3444816   | + |
| 3300 | 1450646_at   | Region | None            | None   | 5  | 4086152   | 4110752   | - |
| 3301 | 1418382_at   | Region | Apcdd1          | 494504 | 18 | 63040206  | 63182348  | + |
| 3302 | 1451345_at   | Region | Mtap            | 66902  | 4  | 88123618  | 88167275  | + |
| 3303 | 1455018_at   | Region | Lmtk2           | 231876 | 5  | 143211341 | 143229817 | + |
| 3304 | 1426565_at   | Region | Igf1r           | 16001  | 7  | 61836803  | 62111098  | + |

|      |              |        |                    |        |      |           |           |      |
|------|--------------|--------|--------------------|--------|------|-----------|-----------|------|
| 3305 | 1435023_at   | Region | Sh3d1B             | 20403  | 12   | 3775688   | 3876446   | +    |
| 3306 | 1449283_a_at | Region | Mapk12             | 29857  | 15   | 89182510  | 89192715  | -    |
| 3307 | 1436507_at   | Region | Irak2              | 108960 | 6    | 114206414 | 114263340 | +    |
| 3308 | 1416491_at   | Region | Numbl              | 18223  | 7    | 22631965  | 22655228  | +    |
| 3309 | 1415813_at   | Region | Api5 /// LOC329706 | 11800  | 2    | 94116415  | 94142756  | -    |
| 3310 | 1425956_a_at | Region | Cdadc1             | 71891  | 14   | 54094451  | 54133002  | -    |
| 3311 | 1431094_at   | Region | 1110006E14Rik      | 76286  | 12   | 105072403 | 105074202 | +    |
| 3312 | 1452905_at   | Region | Gtl2 /// Lphn1     | 17263  | 12   | 105023823 | 105039917 | +    |
| 3313 | 1452911_at   | Region | Spred1             | 114715 | 2    | 116635298 | 116693185 | +    |
| 3314 | 1427771_x_at | Region | Itgb1              | 16412  | 8    | 3634      | 31325     | +    |
| 3315 | 1422631_at   | Region | Ahr                | 11622  | 12   | 32111362  | 32147826  | -    |
| 3316 | 1426265_x_at | Region | Dlat               | 235339 | 9    | 50706961  | 50732106  | -    |
| 3317 | 1419248_at   | Region | Rgs2               | 19735  | 1    | 143832060 | 143836212 | -    |
| 3318 | 1444199_at   | Region | None               | None   | 1    | 131875684 | 131876289 | -    |
| 3319 | 1434023_at   | Region | AU016693           | 225523 | 18   | 53927584  | 53963545  | -    |
| 3320 | 1453069_at   | Region | Pik3cb             | 74769  | 9    | 98937760  | 99039445  | -    |
| 3321 | 1416894_at   | Region | 1500019G21Rik      | 66245  | 7    | 3905141   | 3929660   | -    |
| 3322 | 1448858_at   | Region | Ulk2               | 29869  | 11   | 61501302  | 61580259  | -    |
| 3323 | 1435049_s_at | Region | AI854703           | 243373 | 6    | 48760814  | 48766567  | +    |
| 3324 | 1448635_at   | Region | Smc211             | 14211  | 4    | 52356135  | 52402534  | +    |
| 3325 | 1460300_a_at | Region | Ltk                | 17005  | 2    | 119265175 | 119274280 | -    |
| 3326 | 1424826_s_at | Region | Mtss1              | 211401 | 15   | 58954404  | 59092928  | -    |
| 3327 | 1457913_at   | Region | 5730601F06Rik      | 77519  | 9    | 20365696  | 20393979  | -    |
| 3328 | 1424012_at   | Region | 4930506L13Rik      | 78802  | 2    | 75675996  | 75679518  | -    |
| 3329 | 1418850_at   | Region | Epc1               | 13831  | 18   | 6478658   | 6558794   | -    |
| 3330 | 1425542_a_at | Region | Ppp2r5c            | 26931  | 12   | 105961123 | 106055786 | +    |
| 3331 | 1450416_at   | Region | Cbx5               | 12419  | 15   | 103258024 | 103277308 | -    |
| 3332 | 1426349_s_at | Region | Tmpo               | 21917  | 10   | 91133084  | 91142861  | -    |
| 3333 | 1451015_at   | Region | Tkt                | 21881  | 14   | 28683743  | 28709316  | +    |
| 3334 | 1448101_s_at | Region | Trim27             | 19720  | 13   | 20660436  | 20672921  | +    |
| 3335 | 1423450_a_at | Region | Hs3st1             | 15476  | 5    | 38365401  | 38506941  | -    |
| 3336 | 1426427_at   | Region | Till1              | 319953 | 15   | 83532371  | 83559476  | -    |
| 3337 | 1434554_at   | Region | Trim37             | 68729  | 11   | 86855069  | 86948674  | +    |
| 3338 | 1442542_at   | Region | B130023L16Rik      | 319558 | 10   | 23081959  | 23082634  | -    |
| 3339 | 1452034_at   | Region | Prepl              | 213760 | 17   | 82893334  | 82920056  | -    |
| 3340 | 1435419_at   | Region | Rgag4              | 331474 | X    | 96667912  | 96672557  | -    |
| 3341 | 1456664_x_at | Region | Hnrpf ///          |        |      |           |           |      |
| 3341 | 1456664_x_at | Region | LOC544823          | 544823 | 11   | 120926636 | 120928218 | -    |
| 3342 | 1425822_a_at | Region | Dtx1               | 14357  | 5    | 119832010 | 119847210 | -    |
| 3343 | 1448251_at   | Region | 9030425E11Rik      | 71566  | 9    | 40636751  | 40734839  | +    |
| 3344 | 1423642_at   | Region | 4930542G03Rik      | 227613 | 2    | 25154324  | 25156803  | -    |
| 3345 | 1422771_at   | Region | Smad6              | 17130  | 9    | 64074118  | 64142302  | -    |
| 3346 | 1417567_at   | Region | Ctnnbip1           | 67087  | 4    | 148010605 | 148059087 | +    |
| 3347 | 1434649_at   | Region | Ccm2               | 216527 | 11   | 6441744   | 6491532   | +    |
| 3348 | 1450058_at   | Region | Asph               | 65973  | 4    | 9376231   | 9595958   | -    |
| 3349 | 1452125_at   | Region | Thrap3             | 230753 | 4    | 125199956 | 125213701 | -    |
| 3350 | 1417474_at   | Region | 1500035H01Rik      | 76568  | 9    | 44761864  | 44781569  | +    |
| 3351 | 1450001_a_at | Region | Ush1c              | 72088  | 7    | 40280705  | 40323838  | -    |
| 3352 | 1454824_s_at | Region | Mtus1              | 102103 | 8    | 39926813  | 40021115  | -    |
| 3353 | 1434776_at   | Region | Sema5a             | 20356  | 15   | 32419980  | 32698954  | +    |
| 3354 | 1428748_at   | Region | 5830428H23Rik      | 78823  | NONE | NONE      | NONE      | NONE |
| 3355 | 1435285_at   | Region | 2700082O15Rik      | 77015  | 2    | 106432845 | 106487143 | +    |
| 3356 | 1427101_at   | Region | Metrn              | 70083  | 17   | 23600571  | 23603045  | -    |
| 3357 | 1421375_a_at | Region | S100a6             | 20200  | 3    | 90421654  | 90422884  | +    |
| 3358 | 1427341_at   | Region | E130103I17Rik      | 319845 | 9    | 22366102  | 22779125  | +    |
| 3359 | 1433519_at   | Region | Nucks1             | 98415  | 1    | 131762351 | 131784790 | +    |
| 3360 | 1454678_s_at | Region | A130022J15Rik      | 101351 | 6    | 97577445  | 97615221  | -    |
| 3361 | 1428465_at   | Region | 5033425B17Rik      | 69804  | 7    | 26136939  | 26138720  | -    |
| 3362 | 1426750_at   | Region | Flnb               | 286940 | 14   | 5564611   | 5619816   | +    |
| 3363 | 1440412_at   | Region | Igsf4d             | 239857 | 16   | 65672212  | 65964483  | -    |
| 3364 | 1450877_at   | Region | BC005537           | 79555  | 13   | 24281534  | 24292776  | +    |
| 3365 | 1428890_at   | Region | Fem1c              | 240263 | 18   | 46726362  | 46747727  | -    |
| 3366 | 1437402_x_at | Region | Tmem41b            | 233724 | 7    | 103825350 | 103839101 | -    |
| 3367 | 1448624_at   | Region | Cd2bp2             | 70233  | 7    | 121241391 | 121245731 | -    |

|      |              |        |               |        |    |           |           |   |
|------|--------------|--------|---------------|--------|----|-----------|-----------|---|
| 3368 | 1434298_at   | Region | Zfhx1b        | 24136  | 2  | 44919283  | 45045178  | - |
| 3369 | 1449687_at   | Region | D10ErtD610e   | 52666  | 10 | 126915321 | 126923060 | - |
| 3370 | 1428541_at   | Region | 3321401G04Rik | 77574  | 6  | 42816018  | 42836530  | - |
| 3371 | 1451486_at   | Region | 1200006F02Rik | 71706  | 5  | 146769947 | 146786310 | - |
| 3372 | 1455388_at   | Region | A030012M09Rik | 319263 | 1  | 7090301   | 7142844   | + |
| 3373 | 1452679_at   | Region | 2410129E14Rik | 73710  | 13 | 33661517  | 33664863  | - |
| 3374 | 1449004_at   | Region | Mrpl46        | 67308  | 7  | 72567449  | 72575197  | - |
| 3375 | 1437563_at   | Region | Phf201        | 239510 | 15 | 66601624  | 66648123  | + |
| 3376 | 1424754_at   | Region | Ms4a7         | 109225 | 19 | 10517536  | 10531192  | - |
| 3377 | 1454958_at   | Region | Gsk3b         | 56637  | 16 | 36906890  | 37063968  | + |
| 3378 | 1438454_at   | Region | B430203M17Rik | 320193 | 19 | 32132692  | 32135237  | + |
| 3379 | 1456499_at   | Region | LOC552912     | 552912 | 11 | 49872645  | 49874145  | + |
| 3380 | 1421160_a_at | Region | Rfng          | 19719  | 11 | 120601838 | 120605297 | - |
| 3381 | 1421962_at   | Region | Dnajb5        | 56323  | 4  | 42869016  | 42874654  | + |
| 3382 | 1450674_at   | Region | Cdk5          | 12568  | 5  | 22882139  | 22887427  | - |
| 3383 | 1458355_x_at | Region | Al553587      | 103784 | 11 | 17106711  | 17128589  | + |
| 3384 | 1448480_at   | Region | 1110017C15Rik | 66164  | 8  | 106354564 | 106356932 | + |
| 3385 | 1415670_at   | Region | Copg          | 54161  | 6  | 88324602  | 88350257  | + |
| 3386 | 1425826_a_at | Region | Sorbs1        | 20411  | 19 | 39839082  | 40058071  | - |
| 3387 | 1460390_at   | Region | Sorl          | 20660  | 9  | 41927330  | 42082982  | - |
| 3388 | 1451078_at   | Region | 2510039O18Rik | 77034  | 4  | 146433257 | 146439676 | + |
| 3389 | 1438988_x_at | Region | Hn1           | 15374  | 11 | 115318446 | 115335463 | - |
| 3390 | 1418176_at   | Region | Vdr           | 22337  | 15 | 97930914  | 97984749  | - |
| 3391 | 1420977_at   | Region | Man1a2        | 17156  | 3  | 99992328  | 100111138 | - |
| 3392 | 1441623_at   | Region | None          | None   | 1  | 98385859  | 98387340  | + |
| 3393 | 1423890_x_at | Region | Atp1b1        | 11931  | 1  | 164355219 | 164376238 | - |
| 3394 | 1434261_at   | Region | Sipa1l2       | 244668 | 8  | 124705397 | 124857145 | - |
| 3395 | 1432713_at   | Region | 6430709C05Rik | 76240  | 10 | 108819033 | 108820567 | - |
| 3396 | 1434683_at   | Region | Cutl1         | 13047  | 5  | 135261627 | 135499343 | - |
| 3397 | 1423816_at   | Region | Cxx1b         | 553127 | X  | 48227121  | 48228397  | - |
| 3398 | 1450749_a_at | Region | Nr4a2         | 18227  | 2  | 57033695  | 57040794  | - |
| 3399 | 1455970_at   | Region | None          | None   | 3  | 121649091 | 121650893 | + |
| 3400 | 1426937_at   | Region | 6330406I15Rik | 70717  | 5  | 148350053 | 148369950 | + |
| 3401 | 1449961_at   | Region | Rph3a         | 19894  | 5  | 120092306 | 120161325 | - |
| 3402 | 1459322_at   | Region | Syne2         | 319565 | 12 | 72696171  | 72966517  | + |
| 3403 | 1434272_at   | Region | Cpeb2         | 231207 | 5  | 41990144  | 42042375  | + |
| 3404 | 1434717_at   | Region | Cul3          | 26554  | 1  | 80599109  | 80655022  | - |
| 3405 | 1455192_at   | Region | A230078I05Rik | 319998 | 1  | 75770303  | 75776428  | + |
| 3406 | 1419396_at   | Region | Arid3a        | 13496  | 10 | 80053267  | 80077345  | + |
| 3407 | 1435723_at   | Region | None          | None   | 13 | 90540800  | 90541233  | - |
| 3408 | 1436600_at   | Region | Tnrc9         | 244579 | 8  | 89533527  | 89634739  | - |
| 3409 | 1433460_at   | Region | Ttc7b         | 104718 | 12 | 95744448  | 95966178  | - |
| 3410 | 1419812_s_at | Region | D11ErtD99e    | 52469  | 11 | 101099057 | 101100035 | - |
| 3411 | 1429076_a_at | Region | Gdpd2         | 71584  | X  | 95331301  | 95340254  | + |
| 3412 | 1452896_at   | Region | Gtl3          | 14894  | 8  | 94698722  | 94713270  | - |
| 3413 | 1446094_at   | Region | Atbf1         | 11906  | 8  | 108012331 | 108254925 | + |
| 3414 | 1435629_at   | Region | None          | None   | 3  | 87764423  | 87764854  | - |
| 3415 | 1448653_at   | Region | Eed           | 13626  | 7  | 83945801  | 83972934  | - |
| 3416 | 1456174_x_at | Region | Ndrp1         | 17988  | 15 | 66953527  | 66993844  | - |
| 3417 | 1454892_at   | Region | Pitpnb        | 56305  | 5  | 110380456 | 110438052 | + |
| 3418 | 1437037_x_at | Region | AL033314      | 56463  | 6  | 28527393  | 28935815  | + |
| 3419 | 1428521_at   | Region | Thap3         | 69876  | 4  | 150475001 | 150481359 | - |
| 3420 | 1454717_at   | Region | Ankrd27       | 245886 | 7  | 30750473  | 30804195  | + |
| 3421 | 1454863_at   | Region | Ankrd11       | 77087  | 8  | 122264618 | 122423554 | - |
| 3422 | 1420720_at   | Region | Nptx2         | 53324  | 5  | 143587516 | 143599211 | + |
| 3423 | 1429047_at   | Region | Gtl7          | 76246  | 2  | 119188947 | 119248563 | + |
| 3424 | 1455028_at   | Region | Mapt          | 17762  | 11 | 104052587 | 104149347 | + |
| 3425 | 1450505_a_at | Region | 1810015C04Rik | 66270  | 15 | 25929616  | 25961245  | + |
| 3426 | 1427002_s_at | Region | 6330406P08Rik | 74008  | 11 | 109310969 | 109394419 | + |
| 3427 | 1417873_at   | Region | Pwp1          | 103136 | 10 | 85832809  | 85850040  | + |
| 3428 | 1417613_at   | Region | Ier5          | 15939  | 1  | 154988211 | 154990321 | - |
| 3429 | 1436217_at   | Region | Zfp148        | 22661  | 16 | 32188918  | 32308456  | + |
| 3430 | 1435803_a_at | Region | Eif4e2        | 26987  | 1  | 87030076  | 87054566  | + |
| 3431 | 1432073_at   | Region | 1700113I22Rik | 73635  | 11 | 101239901 | 101246420 | - |
| 3432 | 1457161_at   | Region | 9530029O12Rik | 399629 | 11 | 45615754  | 45616493  | + |

|      |              |        |               |        |    |           |           |   |
|------|--------------|--------|---------------|--------|----|-----------|-----------|---|
| 3433 | 1456700_x_at | Region | Marcks        | 17118  | 10 | 37207003  | 37211096  | - |
| 3434 | 1427770_a_at | Region | Slc2a3        | 20527  | 6  | 123394798 | 123409491 | - |
| 3435 | 1416781_at   | Region | Prpf2         | 54637  | X  | 5967511   | 5970003   | + |
| 3436 | 1426912_at   | Region | Rfwd2         | 26374  | 1  | 159136169 | 159251421 | + |
| 3437 | 1435130_at   | Region | LOC383103     | 383103 | 16 | 10101468  | 10121829  | - |
| 3438 | 1451044_at   | Region | Sip1          | 66603  | 12 | 55746625  | 55761702  | + |
| 3439 | 1416164_at   | Region | Fbln5         | 23876  | 12 | 97192023  | 97264513  | - |
| 3440 | 1425577_at   | Region | 9830124H08Rik | 219105 | 14 | 51315574  | 51334091  | - |
| 3441 | 1454977_at   | Region | AU020772      | 277939 | 7  | 94478918  | 94576823  | + |
| 3442 | 1422165_at   | Region | Pou3f4        | 18994  | X  | 105415830 | 105416915 | + |
| 3443 | 1418942_at   | Region | Ccdc2         | 67694  | 4  | 93629901  | 93668301  | + |
| 3444 | 1423465_at   | Region | Sdfr2         | 20321  | 3  | 115599594 | 115672860 | + |
| 3445 | 1453721_a_at | Region | Slc31a2       | 20530  | 4  | 61377636  | 61389602  | + |
| 3446 | 1437908_a_at | Region | 1200007D18Rik | 67458  | 17 | 24356346  | 24451768  | + |
| 3447 | 1430549_at   | Region | Bet1l         | 54399  | 7  | 135255293 | 135258149 | - |
| 3448 | 1428140_at   | Region | Oxct1         | 67041  | 15 | 3809284   | 3936636   | + |
| 3449 | 1433544_at   | Region | Als2cr2       | 227154 | 1  | 59278531  | 59300058  | + |
| 3450 | 1421508_at   | Region | Odz1          | 23963  | X  | 37053187  | 37688613  | - |
| 3451 | 1415745_a_at | Region | Dscr3         | 13185  | 16 | 93894798  | 93923338  | - |
| 3452 | 1440516_at   | Region | None          | None   | X  | 58933477  | 58934253  | - |
| 3453 | 1441791_at   | Region | Oprm1         | 18390  | 10 | 3465202   | 3714699   | - |
| 3454 | 1435921_at   | Region | D8Erd587e     | 52335  | 8  | 109024127 | 109027469 | - |
| 3455 | 1425574_at   | Region | Epha3         | 13837  | 16 | 62549020  | 62869320  | - |
| 3456 | 1438046_at   | Region | AU019823      | 270156 | 9  | 50677566  | 50689572  | - |
| 3457 | 1439537_at   | Region | None          | None   | 6  | 31168762  | 31169604  | - |
| 3458 | 1440901_at   | Region | Dgkb          | 217480 | 12 | 34483693  | 34776186  | + |
| 3459 | 1457112_at   | Region | A230106N23    | 329274 | 1  | 155972580 | 155984674 | - |
| 3460 | 1437151_at   | Region | Usp22         | 216825 | 11 | 60878669  | 60900563  | - |
| 3461 | 1449442_at   | Region | Pex11a        | 18631  | 7  | 73535535  | 73541429  | - |
| 3462 | 1420614_at   | Region | Tcte1l        | 67117  | X  | 7893210   | 7901923   | - |
| 3463 | 1426950_at   | Region | Parp16        | 214424 | 9  | 65336986  | 65361483  | + |
| 3464 | 1425339_at   | Region | Plcb4         | 18798  | 2  | 135319401 | 135526921 | + |
| 3465 | 1434231_x_at | Region | Rpl35         | 66489  | 2  | 38933743  | 38937293  | - |
| 3466 | 1424916_x_at | Region | 8030466O12Rik | 233893 | 7  | 121453399 | 121456553 | - |
| 3467 | 1444447_at   | Region | Nek7          | 59125  | 1  | 138334093 | 138469075 | - |
| 3468 | 1420967_at   | Region | Slc25a15      | 18408  | 8  | 21128178  | 21150724  | - |
| 3469 | 1416118_at   | Region | None          | None   | 3  | 68705851  | 68714366  | - |
| 3470 | 1432931_at   | Region | LOC544914     | 544914 | 12 | 1837      | 24141     | - |
| 3471 | 1435751_at   | Region | Abcc9         | 20928  | 6  | 143432402 | 143545542 | - |
| 3472 | 1448467_a_at | Region | LOC114601     | 114601 | 19 | 5496839   | 5515060   | - |
| 3473 | 1417409_at   | Region | Jun           | 16476  | 4  | 94024127  | 94027259  | - |
| 3474 | 1429796_at   | Region | Kalrn         | 224126 | 16 | 32822303  | 32837233  | - |
| 3475 | 1429273_at   | Region | Bmper         | 73230  | 9  | 23116165  | 23378425  | + |
| 3476 | 1435776_at   | Region | LOC545365     | 545365 | 1  | 138696345 | 138701165 | - |
| 3477 | 1435676_at   | Region | BC027092      | 214552 | 9  | 45780203  | 45790044  | - |
| 3478 | 1447849_s_at | Region | None          | None   | 8  | 114996442 | 114996559 | - |
| 3479 | 1436964_at   | Region | D7Erd715e     | 52480  | 7  | 53714049  | 53752237  | - |
| 3480 | 1440831_at   | Region | 6230421P05Rik | 109033 | 16 | 86887727  | 86889563  | + |
| 3481 | 1450299_at   | Region | Chrna7        | 11441  | 7  | 56872429  | 56986255  | - |
| 3482 | 1457707_at   | Region | Gm489         | 244049 | 7  | 65956375  | 66185373  | - |
| 3483 | 1437061_at   | Region | Mbd1          | 17190  | 18 | 74502520  | 74516914  | + |
| 3484 | 1423274_at   | Region | Ddx26         | 18130  | 14 | 57209161  | 57294009  | - |
| 3485 | 1452811_at   | Region | Atic          | 108147 | 1  | 71853291  | 71875521  | + |
| 3486 | 1436757_a_at | Region | Cox6b1        | 110323 | 7  | 26029666  | 26038843  | - |
| 3487 | 1418451_at   | Region | Gng2          | 14702  | 14 | 18235904  | 18323407  | - |
| 3488 | 1434047_x_at | Region | Hnrpa2b1      | 53379  | 6  | 51608402  | 51617123  | - |
| 3489 | 1423228_at   | Region | B4galt6       | 56386  | 18 | 20900931  | 20961332  | - |
| 3490 | 1460346_at   | Region | Arsa          | 11883  | 15 | 89525354  | 89529236  | - |
| 3491 | 1427705_a_at | Region | Nfkb1         | 18033  | 3  | 134467828 | 134574475 | - |
| 3492 | 1429423_at   | Region | 4930518I15Rik | 74704  | 2  | 156313792 | 156315008 | - |
| 3493 | 1450062_a_at | Region | Maged1        | 94275  | X  | 89196132  | 89202732  | - |
| 3494 | 1444215_at   | Region | None          | None   | 14 | 88328796  | 88329302  | - |
| 3495 | 1418792_at   | Region | Sh3gl2        | 20404  | 4  | 84191648  | 84375572  | + |
| 3496 | 1423589_at   | Region | Arpc4         | 68089  | 6  | 113945942 | 113957478 | + |
| 3497 | 1426398_at   | Region | 6130401J04Rik | 66799  | 1  | 16725948  | 16804454  | - |

|      |              |        |               |        |    |           |           |   |
|------|--------------|--------|---------------|--------|----|-----------|-----------|---|
| 3498 | 1444100_at   | Region | 1110003E01Rik | 68552  | 5  | 64251633  | 64294659  | - |
| 3499 | 1426696_at   | Region | Lrpap1        | 16976  | 5  | 33580650  | 33593377  | - |
| 3500 | 1436938_at   | Region | Rbms3         | 207181 | 9  | 116564518 | 117239065 | - |
| 3501 | 1423846_x_at | Region | Tuba2         | 22143  | 15 | 98989227  | 98992223  | - |
| 3502 | 1416859_at   | Region | Fkbp3         | 30795  | 12 | 61840122  | 61851631  | - |
| 3503 | 1424577_at   | Region | BC008103      | 229524 | 3  | 88653506  | 88657764  | - |
| 3504 | 1435844_at   | Region | A330009N23Rik | 380977 | 15 | 101279404 | 101280305 | + |
| 3505 | 1451367_at   | Region | Cops6         | 26893  | 5  | 137133910 | 137136792 | + |
| 3506 | 1451474_a_at | Region | Parp8         | 52552  | 13 | 113306754 | 113477704 | - |
| 3507 | 1449370_at   | Region | Sox4          | 20677  | 13 | 28430338  | 28433304  | - |
| 3508 | 1415929_at   | Region | Map11c3b      | 67443  | 8  | 120972448 | 120980028 | + |
| 3509 | 1453021_at   | Region | Stxbp5        | 78808  | 10 | 9633720   | 9718785   | - |
| 3510 | 1456778_at   | Region | Nrp2          | 18187  | 1  | 62996720  | 63108906  | + |
| 3511 | 1455526_at   | Region | Diras1        | 208666 | 10 | 81153435  | 81159222  | - |
| 3512 | 1424049_at   | Region | Lrrc42        | 77809  | 4  | 106192419 | 106212342 | - |
| 3513 | 1431030_a_at | Region | Rnf14         | 56736  | 18 | 38520411  | 38541525  | + |
| 3514 | 1426049_a_at | Region | Terf2ip       | 57321  | 8  | 111309109 | 111318168 | + |
| 3515 | 1436663_at   | Region | 1700105P06Rik | 68229  | 19 | 7070309   | 7096879   | - |
| 3516 | 1432181_s_at | Region | Ecgf1         | 72962  | 15 | 89424804  | 89429909  | - |
| 3517 | 1425702_a_at | Region | Enpp5         | 83965  | 17 | 41582289  | 41590057  | + |
| 3518 | 1425050_at   | Region | Isoc1         | 66307  | 18 | 58884044  | 58904170  | + |
| 3519 | 1454729_at   | Region | B130017P16Rik | 81907  | 9  | 103460526 | 103476281 | - |
| 3520 | 1426757_at   | Region | Ampd2         | 109674 | 3  | 107869804 | 107882369 | - |
| 3521 | 1423162_s_at | Region | Spred1        | 114715 | 2  | 116635298 | 116693185 | + |
| 3522 | 1439257_x_at | Region | Rpn1          | 103963 | 6  | 88518156  | 88540499  | + |
| 3523 | 1435432_at   | Region | Centg2        | 347722 | 1  | 89273393  | 89708522  | + |
| 3524 | 1451980_at   | Region | MGI:2384865   | 213819 | 6  | 4553951   | 4596266   | + |
| 3525 | 1433726_at   | Region | 2310035C23Rik | 227446 | 1  | 105555177 | 105695178 | + |
| 3526 | 1444424_at   | Region | Uble1a        | 56459  | 7  | 13308414  | 13337163  | - |
| 3527 | 1460166_at   | Region | Rit2          | 19762  | 18 | 31217063  | 31558917  | - |
| 3528 | 1421818_at   | Region | Bcl6          | 12053  | 16 | 22748871  | 22772551  | - |
| 3529 | 1436411_at   | Region | Atp13a5       | 268878 | 16 | 28020880  | 28167802  | - |
| 3530 | 1423961_at   | Region | Wdr26         | 226757 | 1  | 181127684 | 181165201 | - |
| 3531 | 1419641_at   | Region | Purb          | 19291  | 11 | 6369560   | 6370704   | - |
| 3532 | 1426108_s_at | Region | Cacnb1        | 12295  | 11 | 97823988  | 97904149  | - |
| 3533 | 1425221_at   | Region | E030025L21Rik | 403205 | 12 | 32532013  | 32555904  | + |
| 3534 | 1450483_at   | Region | Gja12         | 118454 | 11 | 58901195  | 58908842  | - |
| 3535 | 1448894_at   | Region | Akr1b8        | 14187  | 6  | 34448432  | 34462722  | + |
| 3536 | 1451430_at   | Region | Slit2         | 20563  | 5  | 46748038  | 47069334  | + |
| 3537 | 1424412_at   | Region | Ogfrl1        | 70155  | 1  | 23503663  | 23655192  | - |
| 3538 | 1425400_a_at | Region | Cited4        | 56222  | 4  | 119689045 | 119690264 | + |
| 3539 | 1456320_at   | Region | BC049806      | 213056 | 1  | 58832103  | 58870824  | - |
| 3540 | 1426791_at   | Region | Rusc2         | 100213 | 4  | 43322447  | 43343004  | + |
| 3541 | 1424683_at   | Region | 1810015C04Rik | 66270  | 15 | 25929616  | 25961245  | + |
| 3542 | 1425362_at   | Region | Hrbl          | 231801 | 5  | 136601442 | 136635293 | - |
| 3543 | 1423189_at   | Region | 6720456B07Rik | 101314 | 6  | 114172603 | 114184782 | + |
| 3544 | 1440655_at   | Region | 3110007P09Rik | 73094  | 4  | 101719268 | 101930082 | + |
| 3545 | 1425893_a_at | Region | Fhit          | 14198  | 14 | 7225961   | 7249456   | - |
| 3546 | 1455329_at   | Region | None          | None   | 19 | 28271216  | 28272833  | + |
| 3547 | 1452964_at   | Region | 4932702F08Rik | 74410  | 2  | 35683403  | 35911458  | - |
| 3548 | 1448651_at   | Region | Nudt5         | 53893  | 2  | 5762306   | 5786008   | + |
| 3549 | 1436266_x_at | Region | Cbx1          | 12412  | 11 | 96610246  | 96629727  | + |
| 3550 | 1416618_at   | Region | Ppox          | 19044  | 1  | 171205831 | 171209999 | - |
| 3551 | 1417786_a_at | Region | Rgs19         | 56470  | 2  | 181405379 | 181410880 | - |
| 3552 | 1454606_at   | Region | 4933426M11Rik | 217684 | 12 | 77651814  | 77742088  | + |
| 3553 | 1428503_a_at | Region | Nkiras1       | 69721  | 14 | 16794546  | 16805426  | + |
| 3554 | 1441927_at   | Region | Syt7          | 54525  | 19 | 9585980   | 9644941   | + |
| 3555 | 1425684_at   | Region | 2310005E10Rik | 67861  | 6  | 34478555  | 34491217  | + |
| 3556 | 1451205_at   | Region | Psmb4         | 19172  | 3  | 94372151  | 94374759  | - |
| 3557 | 1438113_at   | Region | Zmat4         | 320158 | 8  | 22424307  | 22817717  | + |
| 3558 | 1435009_at   | Region | Slc9a6        | 236794 | X  | 51364568  | 51416607  | + |
| 3559 | 1424411_at   | Region | AI840826      | 407243 | 2  | 167099958 | 167170277 | - |
| 3560 | 1456990_at   | Region | None          | None   | 9  | 77685607  | 77686270  | + |
| 3561 | 1455724_at   | Region | None          | None   | X  | 73110270  | 73111259  | - |
| 3562 | 1455123_at   | Region | St18          | 240690 | 1  | 6695648   | 6826537   | + |



|      |              |        |               |        |    |           |           |   |
|------|--------------|--------|---------------|--------|----|-----------|-----------|---|
| 3563 | 1455462_at   | Region | Adcy2         | 210044 | 13 | 64641047  | 65020780  | - |
| 3564 | 1431780_at   | Region | 1700021K14Rik | 69398  | 9  | 108063750 | 108067667 | + |
| 3565 | 1433606_at   | Region | Mitc1         | 75901  | 14 | 28614206  | 28661650  | + |
| 3566 | 1424466_at   | Region | Ipo9          | 226432 | 1  | 135234946 | 135287679 | - |
| 3567 | 1426503_a_at | Region | Rnf121        | 75212  | 7  | 96126119  | 96178400  | - |
| 3568 | 1422858_at   | Region | Trip4         | 56404  | 9  | 65956276  | 66032003  | - |
| 3569 | 1422241_a_at | Region | Ndufa1        | 54405  | X  | 31808155  | 31811717  | - |
| 3570 | 1425196_a_at | Region | Hint2         | 68917  | 4  | 43570149  | 43572439  | - |
| 3571 | 1435820_x_at | Region | Ddr1          | 12305  | 17 | 33397888  | 33421229  | - |
| 3572 | 1446212_at   | Region | Kcnq5         | 226922 | 1  | 22083632  | 22084318  | - |
| 3573 | 1419162_s_at | Region | Dnajc3        | 19107  | 14 | 113495773 | 113540797 | + |
| 3574 | 1419425_at   | Region | Cnr1          | 12801  | 4  | 34203466  | 34224064  | + |
| 3575 | 1426668_at   | Region | Slc30a9       | 109108 | 5  | 66073098  | 66122283  | + |
| 3576 | 1459722_at   | Region | Zswim6        | 67263  | 13 | 103950578 | 104158812 | - |
| 3577 | 1456144_at   | Region | Nav3          | 260315 | 10 | 109569106 | 109718861 | - |
| 3578 | 1437395_at   | Region | Zcchc11       | 230594 | 4  | 107418943 | 107518318 | + |
| 3579 | 1450733_at   | Region | Bicd2         | 76895  | 13 | 48941109  | 48984662  | + |
| 3580 | 1416792_at   | Region | Ppm1g         | 14208  | 5  | 29661606  | 29679483  | - |
| 3581 | 1434147_at   | Region | 4631403P03Rik | 225392 | 18 | 38179349  | 38182885  | + |
| 3582 | 1453731_a_at | Region | 2610318G18Rik | 67171  | 3  | 106343709 | 106369981 | + |
| 3583 | 1425186_at   | Region | Lmbrd1        | 68421  | 1  | 24831774  | 25014116  | + |
| 3584 | 1435555_at   | Region | None          | None   | 1  | 165786931 | 165788757 | - |
| 3585 | 1436970_a_at | Region | Pdgrfb        | 18596  | 18 | 61270767  | 61310385  | + |
| 3586 | 1440076_at   | Region | Sqstm1        | 18412  | 11 | 49952993  | 49963631  | - |
| 3587 | 1428386_at   | Region | Acsl3         | 74205  | 1  | 78992139  | 79040786  | + |
| 3588 | 1422730_at   | Region | Limd1         | 29806  | 9  | 123502410 | 123545221 | + |
| 3589 | 1428251_at   | Region | Smchd1        | 74355  | 17 | 69117606  | 69200198  | - |
| 3590 | 1449773_s_at | Region | Gadd45b       | 17873  | 10 | 81061547  | 81063660  | + |
| 3591 | 1431085_a_at | Region | Pcmt1         | 18537  | 10 | 7494777   | 7527640   | - |
| 3592 | 1437832_x_at | Region | Wars          | 22375  | 12 | 104331027 | 104364190 | - |
| 3593 | 1442982_at   | Region | E230015L20Rik | 320234 | 14 | 25620649  | 25647415  | - |
| 3594 | 1428279_a_at | Region | Atxn714       | 72174  | 12 | 29753981  | 29857347  | + |
| 3595 | 1457248_x_at | Region | Hsd17b7       | 15490  | 1  | 169883718 | 169903346 | - |
| 3596 | 1456155_x_at | Region | Fuca1         | 71665  | 4  | 134802014 | 134821570 | + |
| 3597 | 1424714_at   | Region | Aldoc         | 11676  | 11 | 78048858  | 78052417  | + |
| 3598 | 1442809_at   | Region | Scn9a         | 20274  | 2  | 66338406  | 66490352  | - |
| 3599 | 1458205_at   | Region | None          | None   | 10 | 54310358  | 54310817  | - |
| 3600 | 1450099_a_at | Region | Gba           | 14466  | 3  | 88959413  | 88965154  | + |
| 3601 | 1434958_at   | Region | Sacs          | 50720  | 14 | 55749728  | 55750681  | + |
| 3602 | 1417624_at   | Region | Nab1          | 17936  | 1  | 52758832  | 52802132  | - |
| 3603 | 1452649_at   | Region | Rtn4          | 68585  | 11 | 29587737  | 29637706  | + |
| 3604 | 1416429_a_at | Region | Cat           | 12359  | 2  | 103158757 | 103189874 | - |
| 3605 | 1459219_at   | Region | Rapgef2       | 76089  | 3  | 78790668  | 79018371  | - |
| 3606 | 1425676_a_at | Region | Elovl1        | 54325  | 4  | 117387050 | 117391522 | + |
| 3607 | 1447100_s_at | Region | 5730508B09Rik | 70617  | 3  | 126755462 | 126781211 | - |
| 3608 | 1428261_at   | Region | 2310042L06Rik | 76457  | 15 | 82178713  | 82192917  | + |
| 3609 | 1429907_at   | Region | 1700094D03Rik | 73545  | 3  | 89873214  | 89876294  | + |
| 3610 | 1444488_at   | Region | Cadps         | 27062  | 14 | 10830082  | 11279704  | - |
| 3611 | 1436584_at   | Region | Spry2         | 24064  | 14 | 100435326 | 100439630 | - |
| 3612 | 1428240_at   | Region | Nrxn1         | 18189  | 17 | 87900413  | 88568779  | - |
| 3613 | 1441559_at   | Region | B930007P11Rik | 98080  | 17 | 40019159  | 40019823  | + |
| 3614 | 1426448_at   | Region | Pja1          | 18744  | X  | 94067507  | 94072041  | - |
| 3615 | 1456547_at   | Region | Ski           | 20481  | 4  | 153649703 | 153714882 | - |
| 3616 | 1423549_at   | Region | Slc1a4        | 55963  | 11 | 20196998  | 20227464  | - |
| 3617 | 1456207_at   | Region | None          | None   | X  | 70073103  | 70074645  | - |
| 3618 | 1451002_at   | Region | Aco2          | 11429  | 15 | 81923222  | 81965850  | + |
| 3619 | 1427004_at   | Region | Fbxo2         | 230904 | 4  | 146653030 | 146658779 | + |
| 3620 | 1416006_at   | Region | Mdk           | 17242  | 2  | 91634570  | 91637031  | - |
| 3621 | 1458492_x_at | Region | MGI:2446259   | 235106 | 9  | 28892331  | 29088826  | - |
| 3622 | 1424088_at   | Region | MGI:1929864   | 60315  | 15 | 102392178 | 102398329 | + |
| 3623 | 1450632_at   | Region | LOC433749     | 433749 | 4  | 116687028 | 116688500 | - |
| 3624 | 1440522_at   | Region | B930075F07    | 331484 | X  | 97996786  | 97997457  | + |
| 3625 | 1417701_at   | Region | Ppp1r14c      | 76142  | 10 | 7041618   | 7140096   | - |
| 3626 | 1448688_at   | Region | Podxl         | 27205  | 6  | 31596475  | 31641044  | - |
| 3627 | 1437422_at   | Region | Sema5a        | 20356  | 15 | 32419980  | 32698954  | + |

|      |              |        |                   |        |      |           |           |      |
|------|--------------|--------|-------------------|--------|------|-----------|-----------|------|
| 3628 | 1423125_at   | Region | Dcamk1l           | 13175  | 3    | 54876964  | 55171014  | +    |
| 3629 | 1454603_a_at | Region | Cnot2             | 72068  | 10   | 116174961 | 116270953 | -    |
| 3630 | 1450219_at   | Region | Htr1a             | 15550  | 13   | 101659844 | 101664197 | +    |
| 3631 | 1455767_x_at | Region | Rpl21             | 19933  | 5    | 145724838 | 145728723 | +    |
| 3632 | 1420847_a_at | Region | Fgfr2             | 14183  | 7    | 124341981 | 124389452 | -    |
| 3633 | 1431422_a_at | Region | Dusp14            | 56405  | 11   | 83776037  | 83796349  | -    |
| 3634 | 1427652_x_at | Region | Synj2             | 20975  | 17   | 5881998   | 5950653   | +    |
| 3635 | 1437624_x_at | Region | Nudt16l1          | 66911  | 16   | 4609000   | 4610909   | +    |
| 3636 | 1452464_a_at | Region | Metap1            | 66559  | 2    | 71151081  | 71222934  | +    |
| 3637 | 1421042_at   | Region | Arhgef2           | 16800  | 3    | 88365002  | 88390778  | +    |
| 3638 | 1437615_s_at | Region | 5730409F24Rik     | 107305 | 19   | 9885312   | 9910916   | +    |
| 3639 | 1439850_at   | Region | BC066028          | 407812 | 7    | 135211557 | 135223941 | -    |
| 3640 | 1425455_a_at | Region | Churc1            | 211151 | 12   | 73588088  | 73639767  | +    |
| 3641 | 1437460_x_at | Region | Rin1              | 225870 | 19   | 4839598   | 4845861   | +    |
| 3642 | 1416829_at   | Region | Atp5b             | 11947  | 10   | 127820017 | 127827098 | +    |
| 3643 | 1456659_at   | Region | LOC552902         | 552902 | 17   | 5075931   | 5076497   | +    |
| 3644 | 1421842_a_at | Region | Scamp4            | 56214  | 10   | 80733774  | 80746677  | +    |
| 3645 | 1448917_at   | Region | Thrap6            | 69790  | 15   | 52712125  | 52730111  | +    |
| 3646 | 1433604_x_at | Region | Aldoa             | 11674  | 7    | 120844967 | 120848914 | -    |
| 3647 | 1427640_a_at | Region | Cbfa2t1h          | 12395  | 4    | 13711747  | 13818082  | +    |
| 3648 | 1449682_s_at | Region | 2410129E14Rik     | 73710  | 13   | 33661517  | 33664863  | -    |
| 3649 | 1427084_a_at | Region | Map4k5            | 399510 | 12   | 66635229  | 66724562  | -    |
| 3650 | 1425508_s_at | Region | Arfrp1            | 76688  | 2    | 181074790 | 181082318 | -    |
| 3651 | 1434359_at   | Region | 6330500D04Rik     | 193385 | 13   | 24184806  | 24185879  | +    |
| 3652 | 1424283_at   | Region | Jtb               | 23922  | 3    | 90042068  | 90046256  | +    |
| 3653 | 1438702_at   | Region | None              | None   | 12   | 91193373  | 91194426  | +    |
| 3654 | 1440815_x_at | Region | LOC545039         | 545039 | 14   | 40208840  | 40216744  | +    |
| 3655 | 1420953_at   | Region | Add1              | 11518  | 5    | 33061487  | 33119289  | +    |
| 3656 | 1418019_at   | Region | Cpd               | 12874  | 11   | 76507648  | 76572655  | -    |
| 3657 | 1458833_at   | Region | C130076O07Rik     | 319504 | 12   | 40985533  | 41346376  | +    |
| 3658 | 1416345_at   | Region | Timm8a            | 30058  | X    | 128082197 | 128086568 | -    |
| 3659 | 1431228_s_at | Region | 4930526I15Rik     | 75135  |      | 33381768  | 33382476  | +    |
| 3660 | 1450224_at   | Region | Col4a3            | 12828  | 1    | 82916082  | 83050374  | +    |
| 3661 | 1433947_at   | Region | Rab37             | 58222  | 11   | 114975278 | 114983321 | +    |
| 3662 | 1454587_at   | Region | 9330199C07Rik     | 77245  | 14   | 37072410  | 37073349  | -    |
| 3663 | 1417896_at   | Region | Tjp3              | 27375  | 10   | 81409313  | 81427318  | -    |
| 3664 | 1444015_at   | Region | Papola            | 18789  | 12   | 101247264 | 101284473 | +    |
| 3665 | 1426926_at   | Region | Plcg2             | 234779 | 8    | 116832841 | 116969047 | +    |
| 3666 | 1422525_at   | Region | Atp5k             | 11958  | 5    | 107509508 | 107510602 | -    |
| 3667 | 1439964_at   | Region | D8Bwg1414e        | 66817  | 8    | 111162487 | 111174264 | -    |
| 3668 | 1442328_at   | Region | None              | None   | 7    | 39916613  | 39916968  | -    |
| 3669 | 1456150_at   | Region | A630082K20Rik     | 338523 | 6    | 39276016  | 39343119  | -    |
| 3670 | 1452806_at   | Region | 1500016O10Rik     | 68952  | 7    | 120873047 | 120879946 | +    |
| 3671 | 1439292_at   | Region | None              | None   | 6    | 31276718  | 31277134  | +    |
| 3672 | 1455722_at   | Region | None              | None   | NONE | NONE      | NONE      | NONE |
| 3673 | 1428375_at   | Region | 4932415G12Rik     | 67723  | 10   | 94667892  | 94662897  | -    |
| 3674 | 1452972_at   | Region | 1700013G20Rik     | 75516  | 12   | 8346312   | 8352709   | +    |
| 3675 | 1436315_at   | Region | Myst3             | 244349 | 8    | 21614114  | 21695221  | +    |
| 3676 | 1426047_a_at | Region | Ptprr             | 19279  | 10   | 115705801 | 115963929 | +    |
| 3677 | 1453063_at   | Region | Cltb              | 74325  | 13   | 53203300  | 53220857  | -    |
| 3678 | 1424258_at   | Region | Polr2d            | 69241  | 18   | 32029303  | 32036845  | +    |
| 3679 | 1451092_a_at | Region | Rangap1           | 19387  | 15   | 81754967  | 81780618  | -    |
| 3680 | 1428620_at   | Region | Ensa              | 56205  | 3    | 95112951  | 95119278  | +    |
| 3681 | 1438876_at   | Region | A130014A01Rik     | 402737 | NONE | NONE      | NONE      | NONE |
| 3682 | 1438231_at   | Region | Foxp2             | 114142 | 6    | 14888986  | 15429612  | +    |
| 3683 | 1428355_at   | Region | Osbp2             | 74309  | 11   | 3598519   | 3616991   | -    |
| 3684 | 1426482_at   | Region | Prkrii            | 72981  | 7    | 92794813  | 92809512  | +    |
| 3685 | 1419110_at   | Region | Riok1             | 71340  | 13   | 37576092  | 37600226  | +    |
| 3686 | 1422231_a_at | Region | Tnfrsf25          | 85030  | 4    | 150608296 | 150612481 | +    |
| 3687 | 1421879_at   | Region | Mtmr1             | 53332  | X    | 66033251  | 66087687  | +    |
| 3688 | 1436279_at   | Region | Slc26a7           | 208890 | 4    | 14432162  | 14548722  | -    |
| 3689 | 1455390_at   | Region | AI839550          | 233065 | 7    | 25721615  | 25726918  | +    |
|      |              |        | Tdg /// LOC434200 |        |      |           |           |      |
| 3690 | 1435715_x_at | Region | /// LOC545124     | 21665  | 10   | 82517850  | 82538768  | +    |
| 3691 | 1427401_at   | Region | Chrna5            | 110835 | 9    | 55117369  | 55125764  | +    |

|      |              |        |               |        |    |           |           |   |
|------|--------------|--------|---------------|--------|----|-----------|-----------|---|
| 3692 | 1422704_at   | Region | Gyk           | 14933  | X  | 80362593  | 80437339  | - |
| 3693 | 1437311_at   | Region | A930034L06Rik | 319317 | 2  | 157832651 | 157838559 | + |
| 3694 | 1416875_at   | Region | Parvg         | 64099  | 15 | 84373319  | 84391538  | + |
| 3695 | 1449168_a_at | Region | Akap2         | 11641  | 4  | 57797608  | 57837140  | + |
| 3696 | 1453149_at   | Region | MGI:1917156   | 69906  | 15 | 38993909  | 39012345  | - |
| 3697 | 1455491_at   | Region | LOC432467     | 432467 | 10 | 62980904  | 62990550  | - |
| 3698 | 1456495_s_at | Region | Osbp16        | 99031  | 2  | 76246089  | 76293794  | + |
| 3699 | 1436142_at   | Region | 3526401B18Rik | 70774  | 12 | 73189718  | 73190242  | + |
| 3700 | 1439994_at   | Region | None          | None   | 5  | 52092712  | 52093649  | + |
| 3701 | 1449294_at   | Region | Mrps15        | 66407  | 4  | 125074041 | 125082649 | + |
| 3702 | 1426527_at   | Region | Toe1          | 68276  | 4  | 115762908 | 115766464 | - |
| 3703 | 1448331_at   | Region | Ndufb7        | 66916  | 8  | 82824283  | 82829148  | + |
| 3704 | 1421534_at   | Region | None          | None   | 6  | 50344693  | 50347100  | - |
| 3705 | 1458342_at   | Region | None          | None   | 12 | 81545948  | 81546219  | - |
| 3706 | 1445710_x_at | Region | 1110051B16Rik | 278672 | 14 | 24358464  | 24365306  | + |
| 3707 | 1452962_at   | Region | Tmem25        | 71687  | 9  | 44782634  | 44788071  | - |
| 3708 | 1452895_at   | Region | Fbxo45        | 268882 | 16 | 31039483  | 31056396  | - |
| 3709 | 1458702_at   | Region | 2610316D01Rik | 72511  | 3  | 44739307  | 44837135  | - |
| 3710 | 1452046_a_at | Region | Ppp1cc        | 19047  | 5  | 121310629 | 121327619 | + |
| 3711 | 1457275_at   | Region | Dmn           | 233335 | 7  | 61614971  | 61644496  | - |
| 3712 | 1439959_at   | Region | Fgf11         | 14166  | 11 | 69523860  | 69527283  | - |
| 3713 | 1427284_a_at | Region | Ttpa          | 50500  | 4  | 20109542  | 20132072  | + |
| 3714 | 1427275_at   | Region | Smc411        | 70099  | 3  | 68675494  | 68705145  | + |
| 3715 | 1452850_s_at | Region | Brms1l        | 52592  | 12 | 52556120  | 52589380  | + |
| 3716 | 1434127_a_at | Region | H3f3a         | 15078  | 1  | 180756388 | 180767423 | - |
| 3717 | 1456510_x_at | Region | MGI:3026615   | 393082 | 15 | 100410740 | 100418501 | + |
| 3718 | 1420950_at   | Region | Znrf1         | 170737 | 8  | 110834431 | 110921367 | + |
|      |              |        | Tceal3 ///    |        |    |           |           |   |
|      |              |        | LOC331528 /// |        |    |           |           |   |
|      |              |        | Tceal5 ///    |        |    |           |           |   |
| 3719 | 1450961_a_at | Region | LOC594844     | 331528 | X  | 130135507 | 130213313 | + |
| 3720 | 1453102_at   | Region | Flrt3         | 71436  | 2  | 140172056 | 140185326 | - |
| 3721 | 1443890_at   | Region | None          | None   | 2  | 34782772  | 34783257  | - |
| 3722 | 1449108_at   | Region | Fdx1          | 14148  | 9  | 52015254  | 52035480  | - |
| 3723 | 1445723_at   | Region | Akr1b3        | 11677  | 6  | 34398202  | 34411739  | - |
| 3724 | 1434223_at   | Region | 1810007P19Rik | 230751 | 4  | 125085714 | 125116447 | + |
| 3725 | 1435616_at   | Region | Cyp20a1       | 77951  | 1  | 60674554  | 60691350  | + |
| 3726 | 1449054_a_at | Region | Pcbp4         | 59092  | 9  | 106517872 | 106528323 | + |
| 3727 | 1436482_a_at | Region | Sdc3          | 20970  | 4  | 129589463 | 129623202 | + |
| 3728 | 1433756_at   | Region | 4930429A08Rik | 74648  | 4  | 128175113 | 128176098 | - |
| 3729 | 1457999_at   | Region | 2410005O16Rik | 66302  | 4  | 19502173  | 19533898  | + |
| 3730 | 1456616_a_at | Region | Bsg           | 12215  | 10 | 79827124  | 79834519  | + |
| 3731 | 1431229_at   | Region | C030032C09Rik | 77531  | 10 | 90548071  | 90943317  | + |
| 3732 | 1439038_at   | Region | 9130227C08Rik | 219094 | 14 | 50402985  | 50414797  | + |
| 3733 | 1417089_a_at | Region | Ckmt1         | 12716  | 2  | 120872490 | 120877586 | + |
| 3734 | 1423102_a_at | Region | Rnf10         | 50849  | 5  | 114351397 | 114382520 | - |
| 3735 | 1443882_at   | Region | None          | None   | 18 | 61419706  | 61421388  | - |
| 3736 | 1431101_a_at | Region | Srd5a1        | 78925  | 13 | 65625480  | 65642329  | - |
| 3737 | 1451248_at   | Region | BC006705      | 214572 | 8  | 105506901 | 105547541 | + |
| 3738 | 1429238_a_at | Region | 5730405M13Rik | 66627  | 5  | 123283663 | 123286801 | + |
| 3739 | 1450685_at   | Region | Arpp19        | 59046  | 9  | 75190732  | 75198588  | + |
| 3740 | 1453271_at   | Region | Phf14         | 75725  | 6  | 11909551  | 11991719  | + |
| 3741 | 1450383_at   | Region | Ldlr          | 16835  | 9  | 21613867  | 21637395  | + |
| 3742 | 1446159_at   | Region | Pak7          | 241656 | 2  | 135595752 | 135901791 | - |
| 3743 | 1417329_at   | Region | Slc23a2       | 54338  | 2  | 131566349 | 131658961 | - |
| 3744 | 1438635_x_at | Region | B930041F14Rik | 230991 | 4  | 154186704 | 154188843 | + |
| 3745 | 1418048_at   | Region | 1110059G10Rik | 66202  | 9  | 122962862 | 122968745 | - |
| 3746 | 1424372_at   | Region | Mrpl32        | 75398  | 13 | 14054854  | 14057590  | - |
| 3747 | 1450804_at   | Region | Kif5c         | 16574  | 2  | 49551476  | 49706940  | + |
| 3748 | 1422486_a_at | Region | Smad4         | 17128  | 18 | 73873242  | 73937970  | - |
|      |              |        | Map11c3b ///  |        |    |           |           |   |
| 3749 | 1415930_a_at | Region | LOC434375     | 434375 | 9  | 1         | 1533      | + |
| 3750 | 1451452_a_at | Region | Rgs16         | 19734  | 1  | 153624984 | 153630102 | + |
| 3751 | 1430999_a_at | Region | Scoc          | 56367  | 8  | 82691600  | 82699587  | - |
| 3752 | 1449614_s_at | Region | AI314976      | 106821 | 17 | 45940087  | 45947164  | + |

|      |              |        |                 |        |      |           |           |      |
|------|--------------|--------|-----------------|--------|------|-----------|-----------|------|
| 3753 | 1459750_s_at | Region | Gpr123          | 52389  | 7    | 134230082 | 134274053 | +    |
| 3754 | 1427070_at   | Region | 5730407K14Rik   | 101113 | 2    | 164242750 | 164244365 | +    |
| 3755 | 1447917_x_at | Region | Ntan1           | 18203  | 16   | 12555143  | 12571313  | +    |
| 3756 | 1453365_at   | Region | Rabgap1l        | 29809  | 1    | 160161852 | 160697585 | -    |
| 3757 | 1421662_a_at | Region | Tusc3           | 80286  | 8    | 37881026  | 38001726  | +    |
|      |              |        | Fxc1 ///        |        |      |           |           |      |
| 3758 | 1417916_a_at | Region | 8030491N06Rik   | 14356  | 7    | 99755452  | 99756758  | +    |
| 3759 | 1448213_at   | Region | Anxa1           | 16952  | 19   | 19618706  | 19635993  | -    |
|      |              |        | Pgk1 ///        |        |      |           |           |      |
|      |              |        | LOC381164 ///   |        |      |           |           |      |
|      |              |        | LOC432633 ///   |        |      |           |           |      |
|      |              |        | LOC433594 ///   |        |      |           |           |      |
| 3760 | 1438640_x_at | Region | LOC545273       | 18655  | X    | 100788594 | 100805024 | +    |
| 3761 | 1448657_a_at | Region | Dnajb10         | 56812  | 1    | 75524048  | 75533251  | +    |
| 3762 | 1435977_at   | Region | 2700022B06Rik   | 72589  | 7    | 75689389  | 75689956  | -    |
| 3763 | 1436125_at   | Region | D16Ertd472e     | 67102  | 16   | 77629000  | 77662117  | -    |
| 3764 | 1460307_at   | Region | Akt3            | 23797  | 1    | 176955410 | 177064396 | -    |
| 3765 | 1434948_at   | Region | Rab11fip2       | 74998  | 19   | 59505244  | 59508287  | -    |
| 3766 | 1449937_at   | Region | Pp11r           | 19011  | 15   | 97786664  | 97796795  | -    |
| 3767 | 1459537_at   | Region | None            | None   | 6    | 29893596  | 29894061  | +    |
| 3768 | 1423560_at   | Region | Nell2           | 54003  | 15   | 95287908  | 95595549  | -    |
| 3769 | 1426280_at   | Region | AV249152        | 216560 | 11   | 21467074  | 21793479  | +    |
| 3770 | 1428535_at   | Region | 9430020K01Rik   | 240185 | 18   | 4653875   | 4685495   | +    |
| 3771 | 1419078_at   | Region | Nin             | 18080  | 12   | 66850915  | 66944121  | -    |
| 3772 | 1441642_at   | Region | None            | None   | NONE | NONE      | NONE      | NONE |
| 3773 | 1422609_at   | Region | Arpp19          | 59046  | 9    | 75190732  | 75198588  | +    |
| 3774 | 1416312_at   | Region | Rars            | 104458 | 11   | 35602413  | 35628536  | -    |
| 3775 | 1426390_a_at | Region | Arf1            | 11840  | 11   | 58937042  | 58939152  | -    |
| 3776 | 1434759_at   | Region | Lrrtm3          | 216028 | 10   | 63866884  | 64028642  | -    |
| 3777 | 1436680_s_at | Region | Ddb2            | 107986 | 2    | 90916605  | 90941731  | -    |
| 3778 | 1421772_a_at | Region | Cox7a2l         | 20463  | 17   | 81335584  | 81347955  | -    |
| 3779 | 1426783_at   | Region | Gcn5l2          | 14534  | 11   | 100526325 | 100533491 | -    |
| 3780 | 1442786_s_at | Region | D5Bwg0860e      | 52822  | 5    | 87850046  | 87908952  | +    |
| 3781 | 1455309_at   | Region | Tmem16f         | 105722 | 15   | 95858140  | 96042070  | +    |
| 3782 | 1417404_at   | Region | Elov16          | 170439 | 3    | 128465310 | 128571362 | +    |
| 3783 | 1428159_s_at | Region | Ndufab1         | 70316  | 7    | 115965902 | 115979706 | -    |
| 3784 | 1452820_at   | Region | Brwd2           | 207425 | 7    | 123667627 | 123711434 | +    |
| 3785 | 1426517_at   | Region | Gnaz            | 14687  | 10   | 75068431  | 75117077  | +    |
| 3786 | 1417030_at   | Region | 2310028N02Rik   | 66950  | 1    | 191062230 | 191089190 | +    |
| 3787 | 1416201_at   | Region | Crk             | 12928  | 11   | 75404968  | 75431752  | +    |
| 3788 | 1430498_at   | Region | 9130009I01Rik   | 71594  | 7    | 76564101  | 76565340  | +    |
| 3789 | 1418699_s_at | Region | Fech            | 14151  | 18   | 64689244  | 64721633  | -    |
| 3790 | 1435086_s_at | Region | Klhdc2          | 69554  | 12   | 66128557  | 66142253  | +    |
| 3791 | 1456069_at   | Region | Dtna            | 13527  | 18   | 23643946  | 23881842  | +    |
| 3792 | 1452768_at   | Region | Tex261          | 21766  | 6    | 84114647  | 84119990  | -    |
| 3793 | 1416311_s_at | Region | Tuba3 /// Tuba7 | 22144  | 6    | 125934969 | 125942711 | -    |
| 3794 | 1433184_at   | Region | 6720477C19Rik   | 77731  | NONE | NONE      | NONE      | NONE |
| 3795 | 1434000_at   | Region | Kras            | 16653  | 6    | 146066254 | 146096662 | -    |
| 3796 | 1438727_at   | Region | Wdr32           | 242418 | 4    | 45258063  | 45290836  | +    |
| 3797 | 1443805_at   | Region | 2700080J24Rik   | 67969  | NONE | NONE      | NONE      | NONE |
| 3798 | 1459922_at   | Region | Al646383        | 106627 | 17   | 34030421  | 34030829  | +    |
| 3799 | 1431602_a_at | Region | 1810064L21Rik   | 66435  | 14   | 113542917 | 113545445 | -    |
| 3800 | 1424745_at   | Region | 2900006B13Rik   | 72947  | 11   | 51337644  | 51355878  | +    |
| 3801 | 1447314_at   | Region | Tgfbr3          | 21814  | 5    | 106170128 | 106359608 | -    |
| 3802 | 1435147_x_at | Region | Igsf4d          | 239857 | 16   | 65672212  | 65964483  | -    |
| 3803 | 1447774_x_at | Region | 5730469M10Rik   | 70564  | 14   | 39139992  | 39160295  | -    |
| 3804 | 1444681_at   | Region | D14Ertd171e     | 238988 | 14   | 25761526  | 26615037  | +    |
| 3805 | 1459961_a_at | Region | None            | None   | 2    | 167726091 | 167726379 | -    |
| 3806 | 1436571_at   | Region | None            | None   | 4    | 137772324 | 137773542 | -    |
| 3807 | 1436235_x_at | Region | 4732471D19Rik   | 319719 | 13   | 53135721  | 53161052  | +    |
| 3808 | 1459311_at   | Region | Pde4d           | 238871 | 13   | 105985350 | 106200700 | +    |
| 3809 | 1439767_at   | Region | Dlgap2          | 244310 | 8    | 14073597  | 14226162  | +    |
| 3810 | 1443822_s_at | Region | None            | None   | 10   | 71384458  | 71384664  | -    |
| 3811 | 1441956_s_at | Region | Cutl1           | 13047  | 5    | 135261627 | 135499343 | -    |
| 3812 | 1424007_at   | Region | Gdf10           | 14560  | 14   | 32056733  | 32068431  | +    |

|                    |              |        |               |        |      |           |           |      |
|--------------------|--------------|--------|---------------|--------|------|-----------|-----------|------|
| 3813               | 1437093_at   | Region | Dnaic1        | 68922  | 4    | 41708645  | 41777001  | +    |
| 3814               | 1424436_at   | Region | Gart          | 14450  | 16   | 90778573  | 90804117  | -    |
| 3815               | 1456217_at   | Region | D7Wsu128e     | 28018  | 7    | 115945280 | 115956990 | +    |
| 3816               | 1460363_at   | Region | Tnrc6c        | 217351 | 11   | 117475908 | 117583657 | +    |
| 3817               | 1459774_at   | Region | Tm4sf9        | 56224  | 3    | 137631430 | 137793659 | +    |
| 3818               | 1426728_x_at | Region | Ptdss2        | 27388  | 7    | 135533273 | 135558141 | +    |
| 3819               | 1453414_at   | Region | Ypel2         | 77864  | 11   | 86668572  | 86700001  | -    |
| Rpl5 /// LOC545265 |              |        |               |        |      |           |           |      |
| /// LOC545304 ///  |              |        |               |        |      |           |           |      |
| LOC545478 ///      |              |        |               |        |      |           |           |      |
| 3820               | 1451077_at   | Region | LOC545858     | 19983  | 5    | 106971039 | 106978499 | +    |
| 3821               | 1460434_at   | Region | Fundc2        | 67391  | X    | 70043077  | 70056771  | +    |
| 3822               | 1420866_at   | Region | Zfp161        | 22666  | 17   | 67159059  | 67165625  | +    |
| 3823               | 1431818_at   | Region | 1700012B15Rik | 74173  | 12   | 273       | 3622      | +    |
| 3824               | 1415802_at   | Region | Slc16a1       | 20501  | 3    | 104066454 | 104086248 | +    |
| 3825               | 1417108_at   | Region | Knsl8         | 74764  | 17   | 44141181  | 44155796  | -    |
| 3826               | 1457048_at   | Region | Gpr103        | 229214 | 3    | 35641294  | 35684794  | -    |
| 3827               | 1419674_a_at | Region | Dpep1         | 13479  | 8    | 122561123 | 122576107 | +    |
| 3828               | 1418146_a_at | Region | Rbl2          | 19651  | 8    | 90356622  | 90410210  | +    |
| 3829               | 1424374_at   | Region | Gimap4        | 107526 | 6    | 48816795  | 48824784  | +    |
| 3830               | 1450986_at   | Region | Nol5          | 55989  | 1    | 59988637  | 60015046  | +    |
| 3831               | 1436173_at   | Region | Dlc1          | 50768  | 8    | 35376686  | 35421146  | -    |
| 3832               | 1422477_at   | Region | Cables1       | 63955  | 18   | 12026875  | 12133165  | +    |
| 3833               | 1441603_at   | Region | None          | None   | 15   | 78588299  | 78588940  | -    |
| 3834               | 1427157_at   | Region | E030025D05Rik | 216613 | 11   | 28283605  | 28479086  | -    |
| 3835               | 1436248_at   | Region | A330066M24Rik | 320357 | 1    | 157040754 | 157041935 | -    |
| 3836               | 1459976_s_at | Region | Sod1          | 20655  | 16   | 89378174  | 89383756  | +    |
| 3837               | 1449531_at   | Region | Leprel2       | 14789  | 6    | 125497863 | 125514455 | -    |
| 3838               | 1417619_at   | Region | Gadd45gip1    | 102060 | 8    | 84099337  | 84102537  | +    |
| 3839               | 1437421_at   | Region | 6330509M05Rik | 102913 | X    | 18340396  | 18341844  | -    |
| 3840               | 1460690_at   | Region | BC003940      | 192173 | 11   | 120363931 | 120370960 | -    |
| 3841               | 1417666_at   | Region | Dnttip1       | 76233  | 2    | 164202748 | 164224953 | +    |
| 3842               | 1439136_at   | Region | Ssbp3         | 72475  | 4    | 105870375 | 106008599 | +    |
| 3843               | 1427212_at   | Region | Mapkap1       | 227743 | 2    | 34339345  | 34556075  | +    |
| 3844               | 1417169_at   | Region | Usp2          | 53376  | 9    | 44056022  | 44083332  | +    |
| 3845               | 1438221_at   | Region | C130065N10Rik | 319340 | 1    | 58827446  | 58828542  | -    |
| 3846               | 1422042_at   | Region | Gje1          | 118446 | 5    | 136904409 | 136913559 | -    |
| 3847               | 1455379_at   | Region | Dnali1        | 75563  | 4    | 124082452 | 124092770 | -    |
| 3848               | 1460673_at   | Region | Fpgs          | 14287  | 2    | 32614771  | 32626294  | -    |
| 3849               | 1433100_at   | Region | Al451006      | 105847 | 15   | 89403881  | 89408357  | -    |
| 3850               | 1443337_at   | Region | B130020M22Rik | 320217 | NONE | NONE      | NONE      | NONE |
| 3851               | 1460398_at   | Region | Phf8          | 320595 | X    | 145055576 | 145160228 | +    |
| 3852               | 1439175_at   | Region | A230006I23Rik | 319919 | 4    | 75198759  | 75199393  | -    |
| 3853               | 1456943_a_at | Region | None          | None   | 2    | 163948096 | 163950053 | +    |
| 3854               | 1452659_at   | Region | Dek           | 110052 | 13   | 46682934  | 46704259  | -    |
| 3855               | 1439266_a_at | Region | Polr3k        | 67005  | 2    | 181581407 | 181587121 | +    |
| 3856               | 1421012_at   | Region | Srprb         | 20818  | 9    | 103163286 | 103177389 | -    |
| 3857               | 1456057_x_at | Region | 1110006I15Rik | 68539  | 19   | 10067157  | 10078240  | -    |
| 3858               | 1421900_at   | Region | Eif2ak1       | 15467  | 5    | 142939806 | 142944198 | +    |
| 3859               | 1425509_at   | Region | Mark1         | 226778 | 1    | 184396055 | 184497931 | -    |
| 3860               | 1422562_at   | Region | Rrad          | 56437  | 8    | 103921586 | 103924050 | -    |
| 3861               | 1456726_x_at | Region | Qars          | 97541  | 9    | 108556974 | 108564815 | +    |
| 3862               | 1448882_at   | Region | 0610009E20Rik | 66048  | 11   | 72901191  | 72902695  | -    |
| 3863               | 1452821_at   | Region | Tial1         | 21843  | 7    | 122491640 | 122510627 | -    |
| Mcrs1 ///          |              |        |               |        |      |           |           |      |
| 3864               | 1416535_at   | Region | LOC433780     | 433780 | 4    | 143502382 | 143504216 | +    |
| 3865               | 1434109_at   | Region | Sh3bgrl2      | 212531 | 9    | 83878025  | 83930061  | +    |
| 3866               | 1430636_at   | Region | C030010B13Rik | 77310  | 2    | 173046327 | 173120005 | -    |
| 3867               | 1436338_at   | Region | None          | None   | 9    | 50961974  | 50962715  | -    |
| 3868               | 1419064_a_at | Region | Ugt8a         | 22239  | 3    | 124748763 | 124839904 | -    |
| 3869               | 1444728_at   | Region | None          | None   | 6    | 33695094  | 33695970  | +    |
| 3870               | 1424248_at   | Region | MGI:107562    | 74100  | 9    | 112222231 | 112229149 | -    |
| 3871               | 1452283_at   | Region | 5133400D11Rik | 71323  | 6    | 146741343 | 146750544 | +    |
| 3872               | 1435232_x_at | Region | None          | None   | 1    | 4736767   | 4737197   | -    |

|      |              |        |               |        |    |           |           |   |
|------|--------------|--------|---------------|--------|----|-----------|-----------|---|
| 3873 | 1444640_at   | Region | MGI:3576484   | 433931 | 5  | 107388818 | 107425565 | + |
| 3874 | 1433842_at   | Region | Lrrfp1        | 16978  | 1  | 90875248  | 90952241  | + |
| 3875 | 1444538_at   | Region | AL033314      | 56463  | 6  | 28527393  | 28935815  | + |
| 3876 | 1460579_at   | Region | Dnpep         | 13437  | 1  | 75598827  | 75608568  | - |
| 3877 | 1424992_at   | Region | 1810034M08Rik | 69786  | 6  | 86345388  | 86360039  | + |
| 3878 | 1439542_at   | Region | Zfp651        | 270210 | 9  | 121778127 | 121782382 | + |
| 3879 | 1448529_at   | Region | Thbd          | 21824  | 2  | 147861407 | 147865039 | - |
| 3880 | 1422551_at   | Region | Zfp306        | 72739  | 13 | 20867145  | 20884810  | - |
| 3881 | 1455876_at   | Region | Slc4a7        | 218756 | 14 | 13169299  | 13264198  | + |
| 3882 | 1428596_at   | Region | 2700008N14Rik | 76795  | 11 | 49884214  | 49925626  | + |
| 3883 | 1449485_at   | Region | Ripk1         | 19766  | 13 | 33537383  | 33569679  | + |
| 3884 | 1416538_at   | Region | Ysg2          | 22619  | 9  | 37555344  | 37589819  | + |
| 3885 | 1435695_a_at | Region | A030007L17Rik | 68252  | 6  | 55129420  | 55137192  | - |
| 3886 | 1433870_at   | Region | BC022765      | 217138 | 11 | 96750411  | 96756735  | + |
| 3887 | 1458399_at   | Region | Lrrc3         | 237387 | 10 | 78008170  | 78010833  | - |
| 3888 | 1422045_a_at | Region | Ptpn12        | 19248  | 5  | 19439215  | 19508367  | - |
| 3889 | 1455675_a_at | Region | Tial1         | 21843  | 7  | 122491640 | 122510627 | - |
| 3890 | 1455825_s_at | Region | Lnx1          | 16924  | 5  | 73427153  | 73512831  | - |
| 3891 | 1433655_at   | Region | None          | None   | 7  | 104666413 | 104668232 | - |
| 3892 | 1420841_at   | Region | Ptprf         | 19268  | 4  | 117168706 | 117236351 | - |
| 3893 | 1438470_at   | Region | Socs2         | 216233 | 10 | 95388906  | 95391737  | - |
| 3894 | 1437784_at   | Region | None          | None   | 4  | 13817906  | 13819589  | + |
| 3895 | 1435434_at   | Region | Braf          | 109880 | 6  | 39749542  | 39860924  | - |
| 3896 | 1417607_at   | Region | Cox6a2        | 12862  | 7  | 122255424 | 122256162 | - |
| 3897 | 1449362_a_at | Region | Mink1         | 50932  | 11 | 70288548  | 70340136  | + |
| 3898 | 1437318_at   | Region | Pak3          | 18481  | X  | 137105791 | 137231857 | + |
| 3899 | 1437320_s_at | Region | Xpa           | 22590  | 4  | 46091161  | 46112233  | - |
| 3900 | 1450950_at   | Region | Cspg6         | 13006  | 19 | 53166173  | 53210193  | + |
| 3901 | 1430316_at   | Region | 4930579E17Rik | 75847  | 12 | 32988680  | 33110743  | + |
| 3902 | 1448936_at   | Region | Stx12         | 100226 | 4  | 131814963 | 131845357 | - |
| 3903 | 1438800_at   | Region | Nagk          | 56174  | 6  | 84139275  | 84146789  | + |
| 3904 | 1440356_at   | Region | None          | None   | 8  | 94104071  | 94104851  | - |
| 3905 | 1417042_at   | Region | Slc37a4       | 14385  | 9  | 44387031  | 44391821  | + |
| 3906 | 1417167_at   | Region | Exosc5        | 27998  | 7  | 20823620  | 20832720  | + |
| 3907 | 1437205_at   | Region | None          | None   | 8  | 122775522 | 122778505 | + |
| 3908 | 1457842_at   | Region | None          | None   | 4  | 34966524  | 34967050  | - |
| 3909 | 1425650_at   | Region | Tle4          | 21888  | 19 | 13671934  | 13821845  | - |
| 3910 | 1436595_at   | Region | Rbm34         | 52202  | 8  | 126234922 | 126258829 | - |
| 3911 | 1448609_at   | Region | Tst           | 22117  | 15 | 78450841  | 78457139  | - |
| 3912 | 1455197_at   | Region | Rnd1          | 223881 | 15 | 98726495  | 98734751  | - |
| 3913 | 1434633_at   | Region | AW558298      | 106441 | 16 | 3752907   | 3754307   | - |
| 3914 | 1436447_at   | Region | A630026N12Rik | 320961 | 2  | 126183781 | 126184348 | - |
| 3915 | 1457649_x_at | Region | Al848149      | 102944 | X  | 149195975 | 149196263 | - |
| 3916 | 1436978_at   | Region | None          | None   | 11 | 59058470  | 59059184  | + |
| 3917 | 1416318_at   | Region | Serpinb1a     | 66222  | 13 | 32321748  | 32330807  | - |

|      |              |        |                  |        |      |           |           |  |      |
|------|--------------|--------|------------------|--------|------|-----------|-----------|--|------|
|      |              |        | Pcdhgb1 ///      |        |      |           |           |  |      |
|      |              |        | Pcdhgb2 ///      |        |      |           |           |  |      |
|      |              |        | Pcdhgb4 ///      |        |      |           |           |  |      |
|      |              |        | Pcdhgb5 ///      |        |      |           |           |  |      |
|      |              |        | Pcdhgb6 ///      |        |      |           |           |  |      |
|      |              |        | Pcdhgb7 ///      |        |      |           |           |  |      |
|      |              |        | Pcdhgb8 ///      |        |      |           |           |  |      |
|      |              |        | Pcdhgc3 ///      |        |      |           |           |  |      |
|      |              |        | Pcdhgc4 ///      |        |      |           |           |  |      |
|      |              |        | Pcdhgc5 ///      |        |      |           |           |  |      |
|      |              |        | Pcdhga1 ///      |        |      |           |           |  |      |
|      |              |        | Pcdhga2 ///      |        |      |           |           |  |      |
|      |              |        | Pcdhga3 ///      |        |      |           |           |  |      |
|      |              |        | Pcdhga4 ///      |        |      |           |           |  |      |
|      |              |        | Pcdhga5 ///      |        |      |           |           |  |      |
|      |              |        | Pcdhga6 ///      |        |      |           |           |  |      |
|      |              |        | Pcdhga7 ///      |        |      |           |           |  |      |
|      |              |        | Pcdhga8 ///      |        |      |           |           |  |      |
|      |              |        | Pcdhga9 ///      |        |      |           |           |  |      |
|      |              |        | Pcdhga10 ///     |        |      |           |           |  |      |
| 3918 | 1423628_s_at | Region | Pcdhga11 /// P   | 93699  | 18   | 38043397  | 38065590  |  | +    |
| 3919 | 1457747_at   | Region | 9330109K16Rik    | 77549  | 8    | 55185601  | 55186176  |  | +    |
| 3920 | 1428714_at   | Region | Pgrmc2           | 70804  | 3    | 40493634  | 40529585  |  | -    |
| 3921 | 1424209_at   | Region | Rarsl            | 109093 | 4    | 34754045  | 34799231  |  | +    |
| 3922 | 1451519_at   | Region | Rnf2             | 19821  | 1    | 151325156 | 151356573 |  | -    |
| 3923 | 1460712_s_at | Region | Ap1g1            | 11765  | 8    | 109076386 | 109159034 |  | +    |
| 3924 | 1428345_at   | Region | 4932443D16Rik    | 74411  | 19   | 28216517  | 28219402  |  | +    |
| 3925 | 1440091_at   | Region | Mrg1             | 17536  | 2    | 115376917 | 115578960 |  | -    |
| 3926 | 1419657_a_at | Region | Slc25a36         | 192287 | 9    | 96976369  | 97010399  |  | -    |
| 3927 | 1433485_x_at | Region | Gpr56            | 14766  | 8    | 94268775  | 94298363  |  | +    |
| 3928 | 1438570_at   | Region | None             | None   | 17   | 49370498  | 49371323  |  | +    |
| 3929 | 1416386_a_at | Region | M6pr             | 17113  | 6    | 122969976 | 122978644 |  | +    |
| 3930 | 1430368_s_at | Region | 1700019D03Rik    | 67080  | 1    | 53227975  | 53255688  |  | -    |
| 3931 | 1439874_at   | Region | 9330102E08Rik    | 330427 | 6    | 128859876 | 128873978 |  | -    |
| 3932 | 1434790_a_at | Region | Lta4h            | 16993  | 10   | 93425960  | 93457364  |  | +    |
| 3933 | 1441732_at   | Region | Sdccag33         | 110796 | 18   | 84180139  | 84254394  |  | -    |
| 3934 | 1443983_at   | Region | Sorbs1           | 20411  | 19   | 39839082  | 40058071  |  | -    |
| 3935 | 1417508_at   | Region | Rnf19            | 30945  | 15   | 36241202  | 36267284  |  | -    |
| 3936 | 1436094_at   | Region | ---              | 381677 | 5    | 136011085 | 136048860 |  | +    |
| 3937 | 1419112_at   | Region | Nlk              | 18099  | 11   | 78292827  | 78423032  |  | -    |
| 3938 | 1437194_x_at | Region | 1200011O22Rik    | 71735  | 5    | 135136559 | 135149493 |  | -    |
| 3939 | 1423572_at   | Region | Bcl2l2           | 12050  | 14   | 49400262  | 49405071  |  | +    |
| 3940 | 1423910_at   | Region | Centg3           | 213990 | 5    | 22916074  | 22965944  |  | +    |
| 3941 | 1439922_at   | Region | 1190002C06Rik    | 73137  | 18   | 57571393  | 57606175  |  | +    |
| 3942 | 1444020_at   | Region | Cspg3            | 13004  | 8    | 69246056  | 69273784  |  | -    |
| 3943 | 1456908_at   | Region | BC023202         | 407816 | 12   | 21514538  | 21515893  |  | +    |
| 3944 | 1416106_at   | Region | 1110001A12Rik    | 100087 | 4    | 107806762 | 107808317 |  | +    |
| 3945 | 1425477_x_at | Region | H2-Ab1 /// Rmcs1 | 114887 | 17   | 31964496  | 31970584  |  | +    |
| 3946 | 1459906_at   | Region | Dgkh             | 380921 | 14   | 72922487  | 72981706  |  | -    |
| 3947 | 1415920_at   | Region | Cstf2t           | 83410  | 19   | 30334913  | 30338502  |  | +    |
| 3948 | 1417781_at   | Region | Lass4            | 67260  | 8    | 3848044   | 3880287   |  | +    |
|      |              |        | Mtcp1 ///        |        |      |           |           |  |      |
| 3949 | 1425755_at   | Region | LOC547409        | 17763  | X    | 70065501  | 70077198  |  | -    |
| 3950 | 1435084_at   | Region | C730049O14Rik    | 320117 | 18   | 21200498  | 21202284  |  | +    |
| 3951 | 1447342_at   | Region | None             | None   | NONE | NONE      | NONE      |  | NONE |
| 3952 | 1440928_at   | Region | D630037F22Rik    | 319841 | 10   | 56264598  | 56265531  |  | -    |
| 3953 | 1454011_a_at | Region | Rpa2             | 19891  | 4    | 131729260 | 131739382 |  | +    |
| 3954 | 1436575_at   | Region | Grin3a           | 242443 | 4    | 49577485  | 49578618  |  | -    |
| 3955 | 1434839_s_at | Region | Tbl1xr1          | 81004  | 3    | 21419728  | 21554694  |  | +    |
| 3956 | 1449101_at   | Region | Ebf2             | 13592  | 14   | 61760384  | 61959861  |  | +    |
| 3957 | 1420610_at   | Region | Prkacb           | 18749  | 3    | 145706130 | 145789479 |  | -    |
| 3958 | 1448781_at   | Region | Nab1             | 17936  | 1    | 52758832  | 52802132  |  | -    |
| 3959 | 1425611_a_at | Region | Cutl1            | 13047  | 5    | 135261627 | 135499343 |  | -    |
| 3960 | 1416593_at   | Region | Glrx1            | 93692  | 13   | 71896546  | 71906783  |  | +    |
| 3961 | 1419824_a_at | Region | A230062G08Rik    | 231326 | 5    | 76120378  | 76149959  |  | -    |

|      |              |        |                    |        |    |           |           |   |
|------|--------------|--------|--------------------|--------|----|-----------|-----------|---|
| 3962 | 1427484_at   | Region | Eml5               | 319670 | 12 | 94214380  | 94328523  | - |
| 3963 | 1418390_at   | Region | Phf21a             | 192285 | 2  | 91918732  | 92065593  | + |
| 3964 | 1453481_at   | Region | Zdhhc2             | 70546  | 8  | 39367458  | 39428485  | + |
| 3965 | 1418692_at   | Region | Rab8a              | 17274  | 8  | 71319426  | 71338872  | + |
| 3966 | 1441187_at   | Region | E330037M01Rik      | 319775 | 5  | 24438034  | 24473535  | + |
| 3967 | 1445277_at   | Region | None               | None   | 6  | 99803878  | 99804567  | - |
| 3968 | 1430101_at   | Region | 6330406O05Rik      | 70716  | 7  | 50985942  | 50987241  | - |
| 3969 | 1452882_at   | Region | Pgrmc2             | 70804  | 3  | 40493634  | 40529585  | - |
| 3970 | 1454230_a_at | Region | Slc25a27           | 74011  | 17 | 41143342  | 41168531  | - |
| 3971 | 1430353_at   | Region | Glis3              | 226075 | 19 | 27503039  | 27780224  | - |
| 3972 | 1455160_at   | Region | 2610203C20Rik      | 70455  | 9  | 41545294  | 41546567  | + |
| 3973 | 1435371_x_at | Region | Ces3               | 104158 | 8  | 92449775  | 92481484  | - |
| 3974 | 1439518_at   | Region | Mmrn2              | 105450 | 14 | 32512110  | 32539866  | + |
| 3975 | 1448262_at   | Region | Psmb2              | 26445  | 4  | 125704779 | 125736819 | + |
| 3976 | 1416498_at   | Region | Ppic               | 19038  | 18 | 53624470  | 53636136  | - |
| 3977 | 1455556_at   | Region | Notch2             | 18129  | 3  | 97499747  | 97633658  | + |
| 3978 | 1429250_at   | Region | Dnchc2             | 110350 | 9  | 6893083   | 6980932   | - |
| 3979 | 1434682_at   | Region | 6430601A21Rik      | 228491 | 2  | 113707303 | 113715272 | - |
| 3980 | 1425082_s_at | Region | 9030416H16Rik      | 71521  | 5  | 64424699  | 64449836  | - |
| 3981 | 1456233_at   | Region | None               | None   | 12 | 17802777  | 17803445  | + |
| 3982 | 1458866_at   | Region | A930001M12Rik      | 320500 | 4  | 40611031  | 40614504  | + |
| 3983 | 1423727_at   | Region | Cnih               | 12793  | 14 | 41855551  | 41868219  | - |
| 3984 | 1418442_at   | Region | Xpo1               | 103573 | 11 | 23150860  | 23192321  | + |
| 3985 | 1436295_at   | Region | Hcrr1              | 230777 | 4  | 129157330 | 129166275 | - |
| 3986 | 1457497_at   | Region | Syt1               | 20979  | 10 | 108385089 | 108577499 | - |
| 3987 | 1425116_a_at | Region | Spnb4              | 80297  | 7  | 22732993  | 22822146  | - |
| 3988 | 1421195_at   | Region | Cckar              | 12425  | 5  | 52508626  | 52518241  | - |
| 3989 | 1427382_a_at | Region | Suv39h1            | 20937  | X  | 6300242   | 6313526   | - |
| 3990 | 1451465_at   | Region | Ubl7               | 69459  | 9  | 58024910  | 58043894  | + |
| 3991 | 1419742_at   | Region | 1700037H04Rik      | 67326  | 2  | 130660178 | 130673873 | - |
| 3992 | 1460510_a_at | Region | 1500041J02Rik      | 67876  | 1  | 55354394  | 55373108  | + |
| 3993 | 1441547_at   | Region | Nfia               | 18027  | 4  | 96752972  | 97087465  | + |
| 3994 | 1439259_x_at | Region | Abhd4              | 105501 | 14 | 48779225  | 48789095  | + |
| 3995 | 1429390_at   | Region | Acpl2              | 235534 | 9  | 96722701  | 96788780  | - |
| 3996 | 1435002_at   | Region | zfp507             | 243924 | 7  | 30935188  | 31085431  | - |
| 3997 | 1447791_s_at | Region | Gna14              | 14675  | 19 | 15659862  | 15834920  | + |
| 3998 | 1438142_s_at | Region | 1700021K14Rik      | 69398  | 9  | 108063750 | 108067667 | + |
| 3999 | 1417058_a_at | Region | Krtcap2            | 66059  | 3  | 89002910  | 89006194  | + |
|      |              |        | Hbb /// Hbb-b1 /// |        |    |           |           |   |
| 4000 | 1417184_s_at | Region | Hbb-b2             | 15127  | 7  | 38286     | 50332     | + |
| 4001 | 1427504_s_at | Region | Sfrs2              | 20382  | 11 | 116671000 | 116674175 | - |
| 4002 | 1438402_at   | Region | 9630050M13Rik      | 269233 | 2  | 3035684   | 3145036   | + |
| 4003 | 1430978_at   | Region | Rps25              | 75617  | 9  | 44396569  | 44399261  | + |
| 4004 | 1425066_a_at | Region | 1110061O04Rik      | 97287  | 6  | 113800971 | 113844666 | + |
| 4005 | 1438625_s_at | Region | Ndn /// Pctk1      | 17984  | 7  | 56122085  | 56123665  | + |
| 4006 | 1435045_s_at | Region | None               | None   | 15 | 89516283  | 89517342  | + |
| 4007 | 1426797_at   | Region | 2700094F01Rik      | 72649  | 6  | 30528276  | 30556749  | - |
| 4008 | 1455473_at   | Region | Usp13              | 72607  | 3  | 32345581  | 32346253  | + |
| 4009 | 1457111_at   | Region | AA415038           | 103570 | 11 | 104240459 | 104241135 | - |
| 4010 | 1460168_at   | Region | Slbp               | 20492  | 5  | 32128914  | 32141162  | - |
| 4011 | 1448565_at   | Region | Ppp1r11            | 76497  | 17 | 34708791  | 34711487  | - |
| 4012 | 1426724_at   | Region | Cnn3               | 71994  | 3  | 120205773 | 120237098 | + |
| 4013 | 1451512_s_at | Region | Hibch              | 227095 | 1  | 53147894  | 53223708  | + |
| 4014 | 1422665_a_at | Region | Pcmt1              | 18537  | 10 | 7494777   | 7527640   | - |
| 4015 | 1436043_at   | Region | Scn7a              | 20272  | 2  | 66530712  | 66640318  | - |
| 4016 | 1453052_at   | Region | 3110005G23Rik      | 73067  | 8  | 64061460  | 64083308  | + |
| 4017 | 1437889_x_at | Region | Bgn                | 12111  | X  | 68144299  | 68156586  | + |
| 4018 | 1426831_at   | Region | Ahcy11             | 229709 | 3  | 107460335 | 107492339 | - |
| 4019 | 1450755_at   | Region | Pafah1b2           | 18475  | 9  | 45981441  | 45998071  | - |
| 4020 | 1449472_at   | Region | Gpr12              | 14738  | 5  | 145473843 | 145476932 | - |
| 4021 | 1446071_at   | Region | Steap2             | 74051  | 5  | 5676943   | 5699766   | - |
| 4022 | 1423492_at   | Region | Mrpl45             | 67036  | 11 | 97136943  | 97151007  | + |
| 4023 | 1416260_a_at | Region | Snx1               | 56440  | 9  | 66211465  | 66248213  | - |
| 4024 | 1448208_at   | Region | Smad1              | 17125  | 8  | 78552485  | 78613558  | - |
| 4025 | 1449709_s_at | Region | Ate1               | 11907  | 7  | 124514765 | 124642811 | - |



|      |              |        |               |        |      |           |           |      |
|------|--------------|--------|---------------|--------|------|-----------|-----------|------|
| 4026 | 1428577_at   | Region | Ppfia4        | 68507  | 1    | 134149042 | 134182786 | -    |
| 4027 | 1417316_at   | Region | Them2         | 66834  | 13   | 24297832  | 24311366  | -    |
| 4028 | 1434696_at   | Region | BC037708      | 245866 | 2    | 162474441 | 162503104 | +    |
| 4029 | 1419700_a_at | Region | Prom1         | 19126  | 5    | 42750678  | 42858751  | -    |
| 4030 | 1426314_at   | Region | Ednrb         | 13618  | 14   | 98359614  | 98388688  | -    |
| 4031 | 1457583_at   | Region | A530083M17Rik | 320505 | 3    | 152407159 | 152407607 | -    |
| 4032 | 1447720_x_at | Region | Prkaca        | 18747  | 8    | 83233159  | 83256577  | +    |
| 4033 | 1448618_at   | Region | Mvp           | 78388  | 7    | 121036597 | 121064325 | -    |
| 4034 | 1439899_at   | Region | Galnt13       | 271786 | 2    | 54361926  | 55038861  | +    |
| 4035 | 1422593_at   | Region | Ap3s1         | 11777  | 18   | 46963683  | 47012375  | +    |
| 4036 | 1417252_at   | Region | Nt5c          | 50773  | 11   | 115311518 | 115312907 | -    |
| 4037 | 1456438_x_at | Region | Rpn1          | 103963 | 6    | 88518156  | 88540499  | +    |
| 4038 | 1422703_at   | Region | Gyk           | 14933  | X    | 80362593  | 80437339  | -    |
| 4039 | 1419552_at   | Region | Echdc1        | 52665  | 10   | 29344397  | 29378616  | +    |
| 4040 | 1437943_s_at | Region | Mea1          | 17256  | 17   | 44191851  | 44193708  | +    |
| 4041 | 1415962_at   | Region | Eif3s3        | 68135  | 15   | 51783792  | 51862690  | -    |
| 4042 | 1422751_at   | Region | Tle1          | 21885  | 4    | 71208335  | 71292050  | -    |
| 4043 | 1453846_at   | Region | 2810013C04Rik | 69959  | 5    | 23056650  | 23059765  | +    |
| 4044 | 1458967_at   | Region | None          | None   | NONE | NONE      | NONE      | NONE |
| 4045 | 1455372_at   | Region | Cpeb3         | 208922 | 19   | 36366605  | 36550135  | -    |
| 4046 | 1438416_at   | Region | Thrap5        | 216154 | 10   | 80017343  | 80031526  | -    |
| 4047 | 1451421_a_at | Region | MGI:1913299   | 66049  | 16   | 4678527   | 4683301   | -    |
| 4048 | 1423440_at   | Region | 1110001A07Rik | 66140  | 11   | 86837253  | 86850966  | +    |
| 4049 | 1424358_at   | Region | Ube2e2        | 218793 | 14   | 17092347  | 17412397  | -    |
| 4050 | 1432282_a_at | Region | 2010305C02Rik | 380712 | 11   | 75193737  | 75196303  | +    |
| 4051 | 1435738_x_at | Region | Serf2         | 378702 | 2    | 120963266 | 120964906 | +    |
| 4052 | 1455684_at   | Region | Map3k9        | 338372 | 12   | 78588739  | 78641336  | -    |
| 4053 | 1420381_a_at | Region | Rpl31         | 114641 | 1    | 39664836  | 39668824  | +    |
| 4054 | 1433903_at   | Region | AU021838      | 328099 | 12   | 53972281  | 53973651  | +    |
| 4055 | 1451448_a_at | Region | 1110005A03Rik | 74319  | 11   | 116664693 | 116670827 | +    |
| 4056 | 1421263_at   | Region | Gabra3        | 14396  | X    | 67094472  | 67316841  | -    |
| 4057 | 1434702_at   | Region | 2600009E05Rik | 77006  | 2    | 130167812 | 130178512 | -    |
| 4058 | 1427456_at   | Region | Wdfy3         | 72145  | 5    | 100857137 | 101091457 | -    |
| 4059 | 1418183_a_at | Region | Pscd1         | 19157  | 11   | 117985268 | 118069653 | -    |
| 4060 | 1437016_x_at | Region | Rap2c         | 72065  | X    | 45525090  | 45538760  | -    |
| 4061 | 1416861_at   | Region | Stam          | 20844  | 2    | 14000384  | 14074610  | +    |
| 4062 | 1428617_at   | Region | 1700129L13Rik | 67933  | 10   | 82611323  | 82629097  | +    |
| 4063 | 1436161_at   | Region | Aprin         | 100710 | 5    | 149615145 | 149749995 | +    |
| 4064 | 1451535_at   | Region | Il31ra        | 218624 | 13   | 108915224 | 108959127 | -    |
| 4065 | 1449815_a_at | Region | Ssbp2         | 66970  | 13   | 87661341  | 87840293  | +    |
| 4066 | 1447852_x_at | Region | 2900002H16Rik | 75695  | 5    | 123664423 | 123702734 | -    |
| 4067 | 1447807_s_at | Region | Plekhh1       | 211945 | 12   | 75867965  | 75938050  | +    |
| 4068 | 1439204_at   | Region | Scn3a         | 20269  | 2    | 65315942  | 65422882  | -    |
| 4069 | 1438321_x_at | Region | 4930504E06Rik | 75007  | 3    | 94770775  | 94783992  | +    |
| 4070 | 1441793_at   | Region | Ppp1r11       | 76497  | 17   | 34708791  | 34711487  | -    |
| 4071 | 1458375_at   | Region | LOC212390     | 212390 | 4    | 24748644  | 24986601  | -    |
| 4072 | 1428257_s_at | Region | Dncl2a        | 67068  | 2    | 154693509 | 154707210 | +    |
| 4073 | 1423308_at   | Region | Tgolin1       | 22134  | 6    | 72943992  | 72950517  | -    |
| 4074 | 1440847_at   | Region | Mtss1         | 211401 | 15   | 58954404  | 59092928  | -    |
| 4075 | 1447723_at   | Region | None          | None   | NONE | NONE      | NONE      | NONE |
| 4076 | 1448985_at   | Region | Dusp22        | 105352 | 13   | 30139718  | 30190847  | +    |
| 4077 | 1424270_at   | Region | Dcamk11       | 13175  | 3    | 54876964  | 55171014  | +    |
| 4078 | 1440393_at   | Region | Odz2          | 23964  | 11   | 35801678  | 36738275  | -    |
| 4079 | 1452307_at   | Region | Cables2       | 252966 | 2    | 179976719 | 179990423 | -    |
| 4080 | 1452497_a_at | Region | Nfatc3        | 18021  | 8    | 105355731 | 105424292 | +    |
| 4081 | 1440092_at   | Region | Ext1          | 14042  | 15   | 53068219  | 53345629  | -    |
| 4082 | 1433603_at   | Region | Ndufs6        | 407785 | 13   | 69375417  | 69384002  | -    |
| 4083 | 1448928_at   | Region | Hdac6         | 15185  | X    | 6169066   | 6186184   | -    |
| 4084 | 1448537_at   | Region | Ttc1          | 66827  | 11   | 43482843  | 43500810  | -    |
| 4085 | 1417340_at   | Region | Txnl2         | 30926  | 7    | 131806311 | 131837120 | +    |
| 4086 | 1450146_at   | Region | Freq          | 14299  | 2    | 31178085  | 31227634  | +    |
| 4087 | 1448722_s_at | Region | 6330579B17Rik | 106564 | 4    | 118377438 | 118381296 | -    |
| 4088 | 1452271_at   | Region | Xpr1          | 19775  | 1    | 155171522 | 155308066 | -    |
| 4089 | 1424227_at   | Region | Polr3h        | 78929  | 15   | 81965747  | 81976930  | -    |
| 4090 | 1427562_a_at | Region | Prkca         | 18750  | 11   | 107759337 | 108165017 | -    |

|      |              |        |               |        |    |           |           |   |
|------|--------------|--------|---------------|--------|----|-----------|-----------|---|
| 4091 | 1448825_at   | Region | Pdk2          | 18604  | 11 | 94847345  | 94862402  | - |
| 4092 | 1435319_at   | Region | 1500005N04Rik | 76500  | 9  | 108842504 | 108852864 | + |
| 4093 | 1427091_at   | Region | AI481105      | 98999  | 2  | 166492526 | 166519674 | - |
| 4094 | 1435701_at   | Region | None          | None   | 16 | 84554007  | 84554735  | - |
| 4095 | 1428837_at   | Region | Klhl14        | 225266 | 18 | 21773688  | 21873554  | - |
| 4096 | 1449373_at   | Region | Dnajc3        | 19107  | 14 | 113495773 | 113540797 | + |
| 4097 | 1448475_at   | Region | Olflml3       | 99543  | 3  | 103162790 | 103165339 | - |
| 4098 | 1450654_a_at | Region | Dhdds         | 67422  | 4  | 132929956 | 132961763 | - |
| 4099 | 1433909_at   | Region | None          | None   | 7  | 112256570 | 112257034 | - |
| 4100 | 1427567_a_at | Region | Tpm3          | 59069  | 3  | 89883112  | 89911022  | + |
| 4101 | 1441372_at   | Region | 5930405F01Rik | 320550 | 18 | 68179047  | 68179854  | + |
| 4102 | 1455297_at   | Region | Spin2         | 278240 | X  | 147366689 | 147368636 | + |
| 4103 | 1419443_at   | Region | Sap18         | 20220  | 14 | 52333126  | 52339849  | + |
| 4104 | 1452180_at   | Region | Phf17         | 269424 | 3  | 41010564  | 41046427  | + |
|      |              |        | SFT2 domain   |        |    |           |           |   |
| 4105 | 1425027_s_at | Region | containing 2  | 108735 | 1  | 165097432 | 165117255 | - |
| 4106 | 1459388_at   | Region | C030036D22Rik | 77607  | 18 | 72458844  | 72459491  | - |
| 4107 | 1422479_at   | Region | Acas2         | 60525  | 2  | 154974980 | 155019680 | + |
| 4108 | 1428830_at   | Region | Atm           | 11920  | 9  | 53504628  | 53601833  | - |
| 4109 | 1417722_at   | Region | Pgls          | 66171  | 8  | 70741855  | 70745938  | + |
| 4110 | 1425977_a_at | Region | Slk           | 20874  | 19 | 47131319  | 47193755  | + |
| 4111 | 1453240_a_at | Region | Gcap14        | 72972  | 14 | 35007246  | 35063441  | - |
| 4112 | 1452857_at   | Region | MGI:2675296   | 233490 | 7  | 84493551  | 84494754  | + |
| 4113 | 1448686_at   | Region | Il16          | 16170  | 7  | 77499493  | 77591920  | - |
| 4114 | 1434435_s_at | Region | Cox17         | 12856  | 16 | 37164821  | 37170611  | + |
| 4115 | 1437211_x_at | Region | Elovl5        | 68801  | 9  | 78084592  | 78151807  | + |
| 4116 | 1425543_s_at | Region | Plekha5       | 109135 | 6  | 141327040 | 141388972 | + |
| 4117 | 1436403_at   | Region | BC025575      | 217219 | 11 | 102258068 | 102268730 | - |
| 4118 | 1438871_at   | Region | Son           | 20658  | 16 | 90805044  | 90836353  | + |
| 4119 | 1457003_at   | Region | AW490526      | 101362 | 6  | 136491096 | 136491549 | - |
| 4120 | 1447404_at   | Region | None          | None   | 18 | 77684040  | 77684459  | - |
| 4121 | 1438624_x_at | Region | Hs3st2        | 195646 | 7  | 115360837 | 115377332 | + |
| 4122 | 1428361_x_at | Region | Hba-a1        | 15122  | 11 | 32178468  | 32179287  | + |
| 4123 | 1420632_a_at | Region | Bscl2         | 14705  | 19 | 80360050  | 8045214   | + |
| 4124 | 1421580_at   | Region | Cntnap1       | 53321  | 11 | 100997204 | 101010934 | + |
| 4125 | 1450998_at   | Region | Zfp110        | 65020  | 7  | 10828742  | 10844258  | + |
| 4126 | 1460741_x_at | Region | D17Wsu92e     | 224647 | 17 | 25549195  | 25616460  | - |
| 4127 | 1419400_at   | Region | Mttp          | 17777  | 3  | 136979815 | 137020253 | - |
| 4128 | 1423925_at   | Region | Dhx16         | 69192  | 17 | 33598972  | 33611823  | + |
| 4129 | 1425812_a_at | Region | Cacna1b       | 12287  | 2  | 24538537  | 24695314  | - |
| 4130 | 1416229_at   | Region | Rfk           | 54391  | 19 | 16618183  | 16625435  | + |
| 4131 | 1460638_at   | Region | Yars          | 107271 | 4  | 128217064 | 128246720 | + |
| 4132 | 1451828_a_at | Region | Acsl4         | 50790  | X  | 135758036 | 135830547 | - |
| 4133 | 1423430_at   | Region | Mybbp1a       | 18432  | 11 | 72167036  | 72177208  | + |
| 4134 | 1416993_at   | Region | Cog4          | 102339 | 8  | 110144769 | 110179947 | + |
| 4135 | 1452826_s_at | Region | Fbxl20        | 72194  | 11 | 97909793  | 97970681  | - |
| 4136 | 1452413_at   | Region | C230081A13Rik | 244895 | 9  | 56336855  | 56527185  | - |
| 4137 | 1451307_at   | Region | Mrpl14        | 68463  | 17 | 43197098  | 43209297  | + |
| 4138 | 1426257_a_at | Region | Sars1         | 20226  | 3  | 108222354 | 108240911 | - |
| 4139 | 1416950_at   | Region | Tnfaip8       | 106869 | 18 | 50268616  | 50306875  | + |
| 4140 | 1456138_at   | Region | E130115E03Rik | 320343 | 2  | 50060532  | 50125726  | + |
|      |              |        | Rps6 ///      |        |    |           |           |   |
|      |              |        | LOC434404 /// |        |    |           |           |   |
|      |              |        | LOC545221 /// |        |    |           |           |   |
| 4141 | 1454620_x_at | Region | LOC545640     | 20104  | 4  | 85840854  | 85843549  | - |
| 4142 | 1454793_x_at | Region | Ddx5          | 13207  | 11 | 106602635 | 106609565 | - |
| 4143 | 1455623_at   | Region | A930031D07Rik | 213006 | 1  | 131888602 | 131919751 | - |
| 4144 | 1448637_at   | Region | Med25         | 75613  | 7  | 38954595  | 38967682  | - |
| 4145 | 1423832_at   | Region | Prkg2         | 108099 | 5  | 23326651  | 23569979  | - |
| 4146 | 1448663_s_at | Region | Mvd           | 192156 | 8  | 121815191 | 121824977 | - |
| 4147 | 1425114_at   | Region | Rbbp6         | 19647  | 7  | 116848797 | 116880431 | + |
| 4148 | 1418700_at   | Region | Lias          | 79464  | 5  | 64193326  | 64211036  | + |
| 4149 | 1422180_a_at | Region | Mcpt6         | 17229  | 17 | 23172190  | 23174949  | + |
| 4150 | 1448542_at   | Region | Bccip         | 66165  | 7  | 128076989 | 128088796 | + |
| 4151 | 1426354_at   | Region | Bap1          | 104416 | 14 | 29383425  | 29391768  | + |

|      |              |        |               |        |      |           |           |      |
|------|--------------|--------|---------------|--------|------|-----------|-----------|------|
| 4152 | 1449553_at   | Region | 2610200G18Rik | 67149  | NONE | NONE      | NONE      | NONE |
| 4153 | 1452599_s_at | Region | AI413582      | 106672 | 17   | 25359687  | 25361618  | -    |
| 4154 | 1423736_a_at | Region | Dym           | 69190  | 18   | 75253957  | 75522151  | +    |
| 4155 | 1451119_a_at | Region | Fbln1         | 14114  | 15   | 85254610  | 85334255  | +    |
| 4156 | 1423207_at   | Region | 0610041E09Rik | 66074  | 13   | 86207541  | 86225129  | +    |
| 4157 | 1423801_a_at | Region | Aprt          | 11821  | 8    | 121956224 | 121958447 | -    |
| 4158 | 1426007_a_at | Region | Ubx d3        | 212190 | 4    | 137599799 | 137618428 | -    |
| 4159 | 1426761_at   | Region | Aof2          | 99982  | 4    | 135431814 | 135483967 | -    |
| 4160 | 1453791_at   | Region | 2810449C10Rik | 72758  | 13   | 79828320  | 79831546  | +    |
| 4161 | 1416858_a_at | Region | Fkbp3         | 30795  | 12   | 61840122  | 61851631  | -    |
| 4162 | 1423188_a_at | Region | 6720456B07Rik | 101314 | 6    | 114172603 | 114184782 | +    |
| 4163 | 1443205_at   | Region | D5Buc30e      | 27785  | 5    | 70922666  | 70923316  | +    |
| 4164 | 1416207_at   | Region | Taz           | 66826  | X    | 68943417  | 68950803  | +    |
| 4165 | 1418814_s_at | Region | Ndufa12       | 66414  | 10   | 94172393  | 94194766  | +    |
| 4166 | 1425255_s_at | Region | Hnrpl1        | 72692  | 17   | 77846881  | 77879599  | -    |
| 4167 | 1424449_at   | Region | Frs3          | 107971 | 17   | 45213667  | 45222746  | +    |
| 4168 | 1417195_at   | Region | D8Ert d594e   | 52357  | 8    | 46797192  | 46960652  | -    |
| 4169 | 1428512_at   | Region | Bhlhb9        | 70237  | X    | 129433841 | 129436014 | +    |
| 4170 | 1432096_at   | Region | Snrpn         | 20646  | 7    | 53759592  | 53781697  | -    |
| 4171 | 1447559_at   | Region | AI834762      | 98429  | 1    | 136105808 | 136106129 | -    |
| 4172 | 1460262_a_at | Region | 1700037H04Rik | 67326  | 2    | 130660178 | 130673873 | -    |
| 4173 | 1450694_at   | Region | Fkbp2         | 14227  | 19   | 6691587   | 6694278   | -    |
| 4174 | 1426645_at   | Region | Hspca         | 15519  | 12   | 106166269 | 106171628 | -    |
| 4175 | 1422809_at   | Region | Rims2         | 116838 | 15   | 39098033  | 39582362  | +    |
| 4176 | 1429766_at   | Region | 2810013P06Rik | 67206  | 8    | 122423784 | 122425711 | +    |
| 4177 | 1422768_at   | Region | Syncrip       | 56403  | 9    | 88814754  | 88842894  | -    |
| 4178 | 1426660_x_at | Region | Rpl23a        | 268449 | 11   | 77906594  | 77909202  | -    |
| 4179 | 1451665_a_at | Region | Ap4s1         | 11782  | 12   | 48442857  | 48490868  | +    |
| 4180 | 1436436_at   | Region | Cnih4         | 98417  | 1    | 181121921 | 181122681 | +    |
| 4181 | 1434025_at   | Region | None          | None   | 14   | 93838296  | 93840097  | +    |
| 4182 | 1427172_at   | Region | Ofd1          | 237222 | X    | 159990341 | 160039960 | -    |
| 4183 | 1455228_at   | Region | Whsc1         | 107823 | 5    | 32363965  | 32365554  | +    |
| 4184 | 1431322_at   | Region | Igsf3         | 78908  | 3    | 100804224 | 100886780 | +    |
| 4185 | 1423234_at   | Region | Psm d5        | 66998  | 2    | 34784262  | 34803092  | -    |
| 4186 | 1431309_at   | Region | 4833412E22Rik | 330010 | 4    | 154536681 | 154551706 | -    |
| 4187 | 1423304_a_at | Region | Rnf111        | 93836  | 9    | 70563535  | 70644248  | -    |
| 4188 | 1452060_a_at | Region | Limk2         | 16886  | 11   | 3239044   | 3303961   | -    |
| 4189 | 1425510_at   | Region | Mark1         | 226778 | 1    | 184396055 | 184497931 | -    |
| 4190 | 1432269_a_at | Region | Sh3kbp1       | 58194  | X    | 153308006 | 153573572 | +    |
| 4191 | 1453419_at   | Region | 2900078C09Rik | 73053  | 9    | 99285879  | 99287285  | -    |
| 4192 | 1425517_s_at | Region | Ogt           | 108155 | X    | 96241425  | 96285710  | +    |
| 4193 | 1416908_s_at | Region | Tsn           | 22099  | 1    | 118048034 | 118060649 | -    |
| 4194 | 1421926_at   | Region | Mapk11        | 19094  | 15   | 89194712  | 89201863  | -    |
| 4195 | 1441467_at   | Region | Tm4sf9        | 56224  | 3    | 137631430 | 137793659 | +    |
| 4196 | 1450971_at   | Region | Gadd45b       | 17873  | 10   | 81061547  | 81063660  | +    |
| 4197 | 1424732_s_at | Region | 3110005G23Rik | 73067  | 8    | 64061460  | 64083308  | +    |
| 4198 | 1436195_at   | Region | BC046404      | 192976 | 11   | 62330534  | 62374173  | -    |
| 4199 | 1416294_at   | Region | Scamp3        | 24045  | 3    | 88934051  | 88939238  | +    |
| 4200 | 1454799_at   | Region | 4933408F15    | 231510 | 5    | 99866783  | 99918835  | +    |
| 4201 | 1453492_at   | Region | 5330408M12Rik | 329795 | 4    | 11966610  | 12014922  | -    |
| 4202 | 1440819_s_at | Region | BC059842      | 230676 | 4    | 117321648 | 117333952 | -    |
| 4203 | 1451453_at   | Region | Dapk2         | 13143  | 9    | 66281592  | 66395569  | +    |
| 4204 | 1434883_at   | Region | Mtdh          | 67154  | 15   | 34082454  | 34141052  | +    |
| 4205 | 1453267_at   | Region | Atbf1         | 11906  | 8    | 108012331 | 108254925 | +    |
| 4206 | 1423706_a_at | Region | Pgd           | 110208 | 4    | 147642356 | 147659030 | -    |
| 4207 | 1426380_at   | Region | Eif4b         | 75705  | 15   | 102141346 | 102156533 | +    |
| 4208 | 1437035_x_at | Region | Rnf14         | 56736  | 18   | 38520411  | 38541525  | +    |
| 4209 | 1426285_at   | Region | Lama2         | 16773  | 10   | 26981182  | 27483486  | -    |
| 4210 | 1453171_s_at | Region | Ppm1a         | 19042  | 12   | 69630561  | 69641441  | +    |
| 4211 | 1434781_at   | Region | None          | None   | 4    | 140641436 | 140642017 | -    |
| 4212 | 1418929_at   | Region | Esrrb1        | 73916  | 16   | 48540632  | 48606670  | +    |
| 4213 | 1436926_at   | Region | Esrrb         | 26380  | 12   | 83231310  | 83394599  | +    |
| 4214 | 1444785_at   | Region | Ski           | 20481  | 4    | 153649703 | 153714882 | -    |
| 4215 | 1420833_at   | Region | Vamp2         | 22318  | 11   | 68814186  | 68818039  | +    |
| 4216 | 1450409_a_at | Region | 4930570C03Rik | 67739  | 15   | 97860010  | 97868333  | +    |

|      |              |        |               |        |      |           |           |      |
|------|--------------|--------|---------------|--------|------|-----------|-----------|------|
| 4217 | 1420655_at   | Region | Adpn          | 116939 | 15   | 84216436  | 84238113  | +    |
| 4218 | 1439244_a_at | Region | Tnrc6a        | 233833 | 7    | 117180427 | 117250357 | +    |
| 4219 | 1460033_at   | Region | C030002C11Rik | 320977 | 1    | 194777203 | 194778275 | +    |
| 4220 | 1417744_a_at | Region | Ralb          | 64143  | 1    | 119221743 | 119256062 | -    |
| 4221 | 1451956_a_at | Region | Oprs1         | 18391  | 4    | 41877189  | 41880006  | -    |
| 4222 | 1433892_at   | Region | Spag5         | 54141  | 11   | 78027295  | 78048113  | +    |
| 4223 | 1445241_at   | Region | Rab11fip4     | 268451 | 11   | 79316871  | 79419671  | +    |
| 4224 | 1433635_at   | Region | Wdr18         | 216156 | 10   | 80082774  | 80090742  | +    |
| 4225 | 1433338_at   | Region | 6720460K10Rik | 77736  | 2    | 59539131  | 59540150  | +    |
| 4226 | 1451250_at   | Region | Gprin1        | 26913  | 13   | 53347815  | 53351668  | -    |
| 4227 | 1422466_at   | Region | Nxn           | 18230  | 11   | 75983616  | 76124799  | -    |
| 4228 | 1449536_at   | Region | Kcnn1         | 84036  | 8    | 69998871  | 70011298  | -    |
| 4229 | 1420964_at   | Region | Enc1          | 13803  | 13   | 93429732  | 93441676  | +    |
| 4230 | 1416517_at   | Region | MGI:1354723   | 50767  | 8    | 407       | 23399     | -    |
| 4231 | 1451265_at   | Region | 2310061I09Rik | 69668  | 1    | 34706179  | 34709175  | -    |
| 4232 | 1451813_at   | Region | Oprk1         | 18387  | 1    | 5551006   | 5565381   | +    |
| 4233 | 1434036_at   | Region | Mtss1         | 211401 | 15   | 58954404  | 59092928  | -    |
| 4234 | 1444051_at   | Region | 1700019D03Rik | 67080  | 1    | 53227975  | 53255688  | -    |
| 4235 | 1427573_at   | Region | Chic1         | 12212  | X    | 97957921  | 97991407  | +    |
| 4236 | 1451650_at   | Region | 5330420D20Rik | 70503  | 10   | 40708813  | 40729005  | +    |
| 4237 | 1425106_a_at | Region | Wars          | 22375  | 12   | 104331027 | 104364190 | -    |
| 4238 | 1446473_at   | Region | 4732418C07Rik | 230648 | 4    | 114696978 | 114736232 | +    |
| 4239 | 1457702_at   | Region | Gpr12         | 14738  | 5    | 145473843 | 145476932 | -    |
| 4240 | 1451096_at   | Region | Ndufs2        | 226646 | 1    | 171163699 | 171175951 | -    |
| 4241 | 1458919_at   | Region | Mkln1         | 27418  | 6    | 31475825  | 31586464  | +    |
| 4242 | 1448391_at   | Region | Rab9          | 56382  | X    | 160056664 | 160079101 | -    |
| 4243 | 1427213_at   | Region | Pfkfb1        | 18639  | X    | 144168918 | 144178273 | +    |
| 4244 | 1434862_at   | Region | Fut2          | 14344  | 7    | 39731738  | 39749568  | -    |
| 4245 | 1441987_at   | Region | Mbd5          | 109241 | 2    | 49178095  | 49249231  | +    |
| 4246 | 1429955_at   | Region | 5031434O11Rik | 75980  | 3    | 51194435  | 51199082  | +    |
| 4247 | 1435536_at   | Region | Rsc1a1        | 69994  | 4    | 140564825 | 140604658 | -    |
| 4248 | 1434466_at   | Region | Atcay         | 16467  | 10   | 81340453  | 81366832  | -    |
| 4249 | 1440715_s_at | Region | D11Ert497e    | 52626  | 11   | 51720504  | 51730177  | +    |
| 4250 | 1435627_x_at | Region | Mlp           | 17357  | 4    | 128540757 | 128543088 | +    |
| 4251 | 1436772_at   | Region | Gria4         | 14802  | 9    | 4328268   | 4706535   | -    |
| 4252 | 1448439_at   | Region | D17Wsu104e    | 28106  | 17   | 53813582  | 53820961  | -    |
| 4253 | 1452504_s_at | Region | Ctbs          | 74245  | 3    | 145427044 | 145442322 | +    |
| 4254 | 1454829_at   | Region | Rundc1        | 217201 | 11   | 101246172 | 101256547 | +    |
| 4255 | 1448317_at   | Region | 2810021O14Rik | 66309  | 5    | 36766600  | 36775843  | +    |
| 4256 | 1452445_at   | Region | Slc41a2       | 338365 | 10   | 83119063  | 83225741  | -    |
| 4257 | 1453733_a_at | Region | 4933434E20Rik | 99650  | 3    | 89863255  | 89872865  | +    |
| 4258 | 1452992_at   | Region | Cdc26         | 66440  | 4    | 61485774  | 61495742  | -    |
| 4259 | 1433782_at   | Region | Cldn12        | 64945  | 5    | 5511114   | 5520878   | -    |
| 4260 | 1419754_at   | Region | Myo5a         | 17918  | 9    | 75209875  | 75357058  | +    |
| 4261 | 1426128_a_at | Region | Kcnq2         | 16536  | 2    | 180792537 | 180852183 | +    |
| 4262 | 1451974_at   | Region | Osbpl2        | 228983 | 2    | 179836331 | 179879418 | -    |
| 4263 | 1428412_at   | Region | MGI:1914262   | 107358 | 19   | 40758164  | 40808343  | -    |
| 4264 | 1431080_at   | Region | 1700021K10Rik | 66331  | 8    | 56815380  | 56835824  | -    |
| 4265 | 1427379_at   | Region | Nte           | 50767  | 8    | 407       | 23399     | -    |
| 4266 | 1416184_s_at | Region | Hmga1         | 15361  | 17   | 25352817  | 25359581  | +    |
| 4267 | 1456505_at   | Region | Braf          | 109880 | 6    | 39749542  | 39860924  | -    |
| 4268 | 1434934_at   | Region | Atpaf1        | 230649 | 4    | 114743890 | 114771219 | +    |
| 4269 | 1436105_at   | Region | 2310015A05Rik | 72315  | 16   | 16417438  | 16421706  | +    |
| 4270 | 1433615_at   | Region | B930062P21Rik | 320709 | 15   | 94697888  | 95164061  | +    |
| 4271 | 1434467_at   | Region | Atcay         | 16467  | 10   | 81340453  | 81366832  | -    |
| 4272 | 1455446_x_at | Region | Acadsb        | 66885  | 7    | 125726405 | 125763064 | +    |
| 4273 | 1439077_at   | Region | None          | None   | NONE | NONE      | NONE      | NONE |
| 4274 | 1426812_a_at | Region | 9130404D14Rik | 227737 | 2    | 32808389  | 32857411  | +    |
| 4275 | 1452061_s_at | Region | Strbp         | 20744  | 2    | 37415390  | 37579381  | -    |
| 4276 | 1438218_at   | Region | Zbtb24        | 268294 | 10   | 41552220  | 41567398  | +    |
| 4277 | 1443045_at   | Region | 5930412E23Rik | 77065  | 1    | 191312045 | 191358940 | +    |
| 4278 | 1455355_at   | Region | 6030408C04Rik | 217558 | 12   | 48120507  | 48125429  | +    |
| 4279 | 1435020_at   | Region | Sdccag1       | 66244  | 12   | 66143332  | 66188963  | -    |
| 4280 | 1448591_at   | Region | Ctss          | 13040  | 3    | 95014675  | 95044230  | +    |
| 4281 | 1452977_at   | Region | Zhx3          | 320799 | 2    | 160227416 | 160329959 | -    |

|      |              |        |                   |        |    |           |           |   |
|------|--------------|--------|-------------------|--------|----|-----------|-----------|---|
| 4282 | 1454925_x_at | Region | Mdh1              | 17449  | 11 | 21451580  | 21466622  | - |
| 4283 | 1441807_s_at | Region | None              | None   | 12 | 3902172   | 3903495   | - |
|      |              |        | Hnrpa3 ///        |        |    |           |           |   |
| 4284 | 1428262_s_at | Region | LOC547321         | 229279 | 2  | 75357026  | 75367156  | + |
| 4285 | 1434153_at   | Region | Shb               | 230126 | 4  | 45339198  | 45448023  | - |
| 4286 | 1439571_at   | Region | E230008J23Rik     | 319683 | 19 | 15836295  | 15837390  | - |
| 4287 | 1453111_a_at | Region | D11Ertd333e       | 68066  | 11 | 102224234 | 102228559 | - |
| 4288 | 1437276_at   | Region | AA589481          | 102423 | 9  | 44284528  | 44294482  | - |
| 4289 | 1436662_at   | Region | Sorcs1            | 58178  | 19 | 49701709  | 50229374  | - |
| 4290 | 1441511_at   | Region | Kcnt1             | 227632 | 2  | 25849756  | 25850436  | + |
| 4291 | 1448326_a_at | Region | Crabp1            | 12903  | 9  | 54882658  | 54891162  | + |
| 4292 | 1448104_at   | Region | Aldh6a1           | 104776 | 12 | 81299064  | 81319297  | - |
| 4293 | 1423621_a_at | Region | Slc33a1           | 11416  | 3  | 63610264  | 63632629  | - |
| 4294 | 1427039_at   | Region | Epn1              | 13854  | 7  | 4330112   | 4348215   | + |
| 4295 | 1455105_at   | Region | Ptpn12            | 19248  | 5  | 19439215  | 19508367  | - |
| 4296 | 1453487_at   | Region | Dhdh              | 71755  | 7  | 39554426  | 39570488  | - |
| 4297 | 1424640_at   | Region | Arl10b            | 68724  | 1  | 134997097 | 135006531 | + |
| 4298 | 1440031_at   | Region | None              | None   | 7  | 13826736  | 13836535  | + |
| 4299 | 1427912_at   | Region | Cbr3              | 109857 | 16 | 92848492  | 92856369  | + |
| 4300 | 1417388_at   | Region | Bex2              | 12069  | X  | 129611505 | 129613049 | - |
| 4301 | 1437167_at   | Region | Tmod2             | 50876  | 9  | 75710299  | 75748747  | - |
| 4302 | 1420471_at   | Region | Hcrt              | 15171  | 11 | 100582780 | 100584018 | - |
| 4303 | 1428750_at   | Region | Cdc42ep2          | 104252 | 19 | 5706351   | 5707785   | - |
| 4304 | 1445874_at   | Region | None              | None   | 19 | 18319561  | 18320316  | - |
| 4305 | 1439648_at   | Region | Anln              | 68743  | 9  | 22222408  | 22279584  | - |
| 4306 | 1447064_at   | Region | D130059P03Rik     | 320538 | 6  | 38570159  | 38638809  | + |
| 4307 | 1455135_at   | Region | 2610014I16Rik     | 66300  | 7  | 21060158  | 21060854  | - |
| 4308 | 1423258_at   | Region | Syt9              | 60510  | 7  | 101319931 | 101498655 | + |
| 4309 | 1437639_at   | Region | 3321401G04Rik     | 77574  | 6  | 42816018  | 42836530  | - |
| 4310 | 1428920_at   | Region | Hmg20a            | 66867  | 9  | 56527993  | 56606058  | + |
| 4311 | 1458430_at   | Region | C87436            | 232196 | 6  | 86827909  | 86902412  | + |
| 4312 | 1421833_at   | Region | Pip5k1a           | 18719  | 19 | 23533932  | 23683715  | - |
| 4313 | 1435602_at   | Region | Seps2             | 20768  | 7  | 121321610 | 121323787 | - |
| 4314 | 1435146_s_at | Region | Igsf4d            | 239857 | 16 | 65672212  | 65964483  | - |
| 4315 | 1448270_at   | Region | Ddx21             | 56200  | 10 | 62546632  | 62565575  | - |
| 4316 | 1424050_s_at | Region | Fgfr1             | 14182  | 8  | 24257087  | 24299020  | + |
| 4317 | 1456686_at   | Region | Zfhx1a            | 21417  | 18 | 5709786   | 5817483   | + |
| 4318 | 1456038_at   | Region | Fbxl4             | 269514 | 4  | 22426936  | 22503417  | + |
| 4319 | 1457549_at   | Region | None              | None   | 17 | 45063158  | 45063794  | + |
| 4320 | 1422208_a_at | Region | Gnb5              | 14697  | 9  | 75448974  | 75483250  | + |
| 4321 | 1416085_s_at | Region | Za20d2            | 22682  | 19 | 20510205  | 20520216  | + |
| 4322 | 1452150_at   | Region | AU040320          | 100317 | 4  | 125780915 | 125881449 | + |
| 4323 | 1424338_at   | Region | Slc6a13           | 14412  | 6  | 121732494 | 121769696 | + |
| 4324 | 1440657_at   | Region | None              | None   | 6  | 103030931 | 103031586 | - |
| 4325 | 1424920_at   | Region | Slc37a3           | 72144  | 6  | 39472104  | 39502599  | - |
| 4326 | 1453023_at   | Region | Ankhd1            | 108857 | 18 | 36868943  | 36889684  | + |
| 4327 | 1451652_a_at | Region | 5033428A16Rik     | 382030 | 8  | 87404151  | 87419831  | + |
| 4328 | 1424463_at   | Region | 2210010L05Rik     | 98682  | 1  | 52961158  | 53031019  | - |
| 4329 | 1418228_at   | Region | Hirip5            | 56748  | 6  | 87443967  | 87462532  | + |
| 4330 | 1428445_at   | Region | Yif1b             | 77254  | 7  | 24649958  | 24659140  | + |
| 4331 | 1428761_a_at | Region | Snopc3            | 77634  | 4  | 82403941  | 82453789  | + |
|      |              |        | 2310042M24Rik /// |        |    |           |           |   |
| 4332 | 1437454_a_at | Region | LOC433144         | 433144 | 17 | 84930790  | 84937034  | + |
| 4333 | 1445579_at   | Region | Ppp1r1a           | 58200  | 15 | 103593360 | 103601042 | - |
| 4334 | 1424696_at   | Region | Gpr89             | 67549  | 3  | 96357516  | 96391167  | - |
| 4335 | 1421029_a_at | Region | Hbs1l             | 56422  | 10 | 21249085  | 21311233  | + |
| 4336 | 1446338_at   | Region | 5730522E02Rik     | 70626  | 11 | 25778962  | 25779638  | - |
| 4337 | 1455271_at   | Region | 1810020C19Rik     | 69113  | 2  | 93685235  | 93715406  | - |
| 4338 | 1460624_at   | Region | 6330564D18Rik     | 109045 | 1  | 130572402 | 130573796 | + |
| 4339 | 1435794_at   | Region | BC050254          | 269630 | 5  | 21896163  | 21897229  | - |
| 4340 | 1450983_at   | Region | Akap8             | 56399  | 17 | 30115536  | 30133013  | - |
| 4341 | 1437785_at   | Region | Adamts9           | 101401 | 6  | 93379900  | 93410347  | - |
| 4342 | 1439651_at   | Region | Lmo4              | 16911  | 3  | 143160075 | 143176516 | - |
| 4343 | 1416960_at   | Region | B3gat3            | 72727  | 19 | 8116940   | 8123783   | + |
| 4344 | 1457398_at   | Region | Gdi3              | 14569  | 13 | 3422528   | 3450201   | + |

|      |              |        |               |        |    |           |           |   |
|------|--------------|--------|---------------|--------|----|-----------|-----------|---|
| 4345 | 1442998_at   | Region | Ctps2         | 55936  | X  | 156501010 | 156631724 | + |
| 4346 | 1424923_at   | Region | Serpina3g     | 20715  | 12 | 99658720  | 99686078  | + |
| 4347 | 1448113_at   | Region | Stmn1         | 16765  | 4  | 133429314 | 133434742 | + |
| 4348 | 1456247_x_at | Region | Plp2          | 18824  | X  | 5906886   | 5910272   | - |
| 4349 | 1434991_at   | Region | Fbxw17        | 109082 | 13 | 25133     | 27788     | + |
| 4350 | 1423252_at   | Region | Hdgfrp3       | 29877  | 7  | 75691975  | 75742185  | - |
| 4351 | 1431815_a_at | Region | Mms19l        | 72199  | 19 | 41488079  | 41525508  | - |
| 4352 | 1437713_x_at | Region | 1500010J02Rik | 68964  | 11 | 68761853  | 68762129  | + |
| 4353 | 1452560_a_at | Region | Nfya          | 18044  | 17 | 45916830  | 45939727  | - |
| 4354 | 1449414_at   | Region | Zfp53         | 24132  | 17 | 19358540  | 19379787  | + |
| 4355 | 1447510_at   | Region | C530014P21Rik | 399604 | 17 | 60555783  | 60556126  | - |
| 4356 | 1435458_at   | Region | None          | None   | 6  | 29344996  | 29346037  | + |
| 4357 | 1450167_at   | Region | Rab37         | 58222  | 11 | 114975278 | 114983321 | + |
| 4358 | 1428897_at   | Region | 2610029I01Rik | 77032  | 4  | 21826755  | 21843550  | - |
| 4359 | 1423367_at   | Region | Wnt7a         | 22421  | 6  | 91807033  | 91860492  | - |
| 4360 | 1455268_at   | Region | Zcs12         | 105638 | 14 | 30212767  | 30217780  | - |
| 4361 | 1439496_at   | Region | 4921524J06Rik | 77057  | 17 | 86507865  | 86509862  | + |
| 4362 | 1441047_at   | Region | 9330175B01Rik | 106068 | 15 | 73605805  | 73674109  | - |
| 4363 | 1434736_at   | Region | Hlf           | 217082 | 11 | 90159652  | 90211982  | - |
| 4364 | 1459034_at   | Region | Wdr19         | 213081 | 5  | 64001542  | 64062244  | + |
| 4365 | 1460320_at   | Region | Becn1         | 56208  | 11 | 101109354 | 101123354 | - |
| 4366 | 1437324_x_at | Region | Fmod          | 14264  | 1  | 133888996 | 133898985 | + |
| 4367 | 1433944_at   | Region | Hectd2        | 226098 | 19 | 35897450  | 35963798  | + |
| 4368 | 1437610_x_at | Region | Rps8          | 20116  | 4  | 116112741 | 116115037 | - |
| 4369 | 1424888_at   | Region | 38413         | 224703 | 17 | 31384823  | 31417809  | - |
| 4370 | 1437841_x_at | Region | AI481750      | 105859 | 15 | 81987653  | 82001658  | + |
| 4371 | 1449274_at   | Region | 2310038H17Rik | 67099  | 1  | 64900564  | 64911252  | - |
| 4372 | 1441438_at   | Region | Gpc6          | 23888  | 14 | 111487529 | 112531234 | + |
| 4373 | 1423372_at   | Region | Pole4         | 66979  | 6  | 82990518  | 82996671  | - |
| 4374 | 1448767_s_at | Region | Gjb1          | 14618  | X  | 95982922  | 95986986  | + |
| 4375 | 1431539_at   | Region | Samsn1        | 67742  | 16 | 74944941  | 74995114  | - |
| 4376 | 1424750_at   | Region | Zbtb1         | 268564 | 12 | 73226354  | 73244538  | + |
| 4377 | 1439439_x_at | Region | Eef1d         | 66656  | 15 | 75944869  | 75959409  | - |
| 4378 | 1416309_at   | Region | Nusap1        | 108907 | 2  | 119132566 | 119163626 | + |
| 4379 | 1455399_at   | Region | Cnksr1        | 194231 | 4  | 133188940 | 133199298 | - |
| 4380 | 1458670_at   | Region | None          | None   | 13 | 8717802   | 8719106   | + |
| 4381 | 1427910_at   | Region | Cst6          | 73720  | 19 | 5133495   | 5138364   | - |
| 4382 | 1429429_s_at | Region | A030012M09Rik | 319263 | 1  | 7090301   | 7142844   | + |
| 4383 | 1446475_at   | Region | Mbnl2         | 105559 | 14 | 114846670 | 115003029 | + |
| 4384 | 1437380_x_at | Region | Pgd           | 110208 | 4  | 147642356 | 147659030 | - |
| 4385 | 1426545_at   | Region | Tnrc6b        | 213988 | 15 | 80975683  | 80982651  | + |
| 4386 | 1417454_at   | Region | Cul4b         | 72584  | X  | 33054070  | 33096992  | - |
| 4387 | 1435430_at   | Region | Tmem1         | 216131 | 10 | 78296209  | 78354672  | - |
| 4388 | 1460406_at   | Region | AI427122      | 102502 | 9  | 95656189  | 95718950  | - |
| 4389 | 1450253_a_at | Region | Map3k4        | 26407  | 17 | 10867071  | 10957848  | - |
| 4390 | 1450040_at   | Region | Timp2         | 21858  | 11 | 118122157 | 118176401 | - |
| 4391 | 1459325_at   | Region | None          | None   | 2  | 83368554  | 83369145  | + |
| 4392 | 1441693_at   | Region | 6330442E02Rik | 330119 | 3  | 72510189  | 72510739  | - |
| 4393 | 1427159_at   | Region | 2500001H09Rik | 74737  | 7  | 86684260  | 86709889  | - |
| 4394 | 1448114_a_at | Region | Htf9c         | 15547  | 16 | 17019721  | 17024544  | + |
| 4395 | 1423918_at   | Region | 4930418P06Rik | 76867  | 1  | 82675433  | 82774473  | + |
| 4396 | 1455977_x_at | Region | Klk6 /// Klk5 | 16612  | 7  | 38299769  | 38303949  | + |
| 4397 | 1425328_at   | Region | BC008163      | 230789 | 4  | 131861517 | 131883410 | - |
| 4398 | 1429201_at   | Region | Cyld          | 74256  | 8  | 87990637  | 88033868  | + |
| 4399 | 1420739_at   | Region | Cntn3         | 18488  | 6  | 102641686 | 102940436 | - |
| 4400 | 1419049_at   | Region | Pcnx          | 54604  | 12 | 78720867  | 78861705  | + |
| 4401 | 1460656_a_at | Region | 5630401J11Rik | 106489 | 17 | 4193      | 20488     | + |
| 4402 | 1452510_at   | Region | Pax7          | 18509  | 4  | 138619342 | 138714229 | - |
| 4403 | 1415860_at   | Region | Kpna2         | 16647  | 11 | 106801935 | 106820537 | - |
| 4404 | 1422972_s_at | Region | Gcn5l2        | 14534  | 11 | 100526325 | 100533491 | - |
| 4405 | 1418039_at   | Region | Rabl3         | 67657  | 16 | 36359367  | 36391849  | + |
| 4406 | 1422945_a_at | Region | Kif5c         | 16574  | 2  | 49551476  | 49706940  | + |
| 4407 | 1434518_at   | Region | Phka2         | 110094 | X  | 154102095 | 154191127 | + |
| 4408 | 1448963_at   | Region | Nfyc          | 18046  | 4  | 119779882 | 119848111 | - |
| 4409 | 1438025_at   | Region | Mtrf1l        | 108853 | 10 | 4687031   | 4697881   | + |

|      |              |        |               |        |    |           |           |   |
|------|--------------|--------|---------------|--------|----|-----------|-----------|---|
| 4410 | 1448257_at   | Region | Slc29a2       | 13340  | 19 | 4814896   | 4820754   | + |
| 4411 | 1451269_at   | Region | Pdzk11        | 72621  | X  | 95224267  | 95227268  | - |
| 4412 | 1454988_s_at | Region | Rab22a        | 19334  | 2  | 173120334 | 173165145 | + |
| 4413 | 1436995_a_at | Region | Rpl26         | 19941  | 11 | 68627241  | 68630192  | + |
| 4414 | 1443862_at   | Region | None          | None   | 11 | 93715331  | 93717156  | + |
| 4415 | 1422559_at   | Region | Ube2n         | 93765  | 10 | 95491346  | 95521553  | + |
| 4416 | 1429180_at   | Region | Gmpr2         | 105446 | 14 | 50190251  | 50197215  | + |
| 4417 | 1434263_at   | Region | Fzr1          | 432479 | 10 | 81500707  | 81501703  | + |
| 4418 | 1452250_a_at | Region | Col6a2        | 12834  | 10 | 76697487  | 76725338  | - |
| 4419 | 1458508_at   | Region | Matr3         | 17184  | 18 | 35795510  | 35815074  | + |
| 4420 | 1418881_at   | Region | Efcfbp2       | 117148 | 8  | 118804707 | 118814783 | + |
| 4421 | 1423723_s_at | Region | Tardbp        | 230908 | 4  | 147104744 | 147119358 | - |
| 4422 | 1428574_a_at | Region | Chn2          | 69993  | 6  | 54417146  | 54446135  | + |
| 4423 | 1419405_at   | Region | Nmb           | 68039  | 7  | 74704936  | 74707736  | - |
| 4424 | 1438790_x_at | Region | Tmem41b       | 233724 | 7  | 103825350 | 103839101 | - |
| 4425 | 1416480_a_at | Region | MGI:1930666   | 56295  | 9  | 121862188 | 121871251 | - |
| 4426 | 1433644_at   | Region | Pomt2         | 217734 | 12 | 83988455  | 84027132  | - |
| 4427 | 1445181_at   | Region | Eml5          | 319670 | 12 | 94214380  | 94328523  | - |
| 4428 | 1438831_at   | Region | Crk7          | 69131  | 11 | 98024401  | 98067791  | + |
| 4429 | 1450664_at   | Region | Gabpa         | 14390  | 16 | 83943193  | 83971913  | + |
| 4430 | 1436893_a_at | Region | 38418         | 57438  | 2  | 60065336  | 60103785  | + |
| 4431 | 1457983_s_at | Region | BC016198      | 192174 | 8  | 46500251  | 46519367  | + |
| 4432 | 1459107_at   | Region | Kcnh3         | 16512  | 15 | 99282782  | 99300623  | + |
| 4433 | 1450018_s_at | Region | Slc25a30      | 67554  | 14 | 70104494  | 70129532  | - |
| 4434 | 1443536_at   | Region | 9930009M05Rik | 319502 | 3  | 49953312  | 49953852  | - |
| 4435 | 1420472_at   | Region | Mtpn          | 14489  | 6  | 35603109  | 35634015  | - |
| 4436 | 1445503_at   | Region | None          | None   | X  | 55217217  | 55217714  | + |
| 4437 | 1443129_at   | Region | None          | None   | 7  | 113016410 | 113016985 | - |
| 4438 | 1438258_at   | Region | Vldlr         | 22359  | 19 | 26457498  | 26489686  | + |
| 4439 | 1447657_s_at | Region | Synpo2l       | 68760  | 14 | 19020730  | 19029618  | - |
| 4440 | 1456968_at   | Region | Actn2         | 11472  | 13 | 12307753  | 12379584  | - |
| 4441 | 1422157_a_at | Region | Itgb1bp1      | 16413  | 12 | 2114      | 18547     | + |
| 4442 | 1452280_at   | Region | Farp1         | 223254 | 14 | 115842411 | 115854479 | + |
| 4443 | 1429251_at   | Region | Prdm2         | 110593 | 4  | 142024189 | 142128244 | - |
| 4444 | 1435985_at   | Region | Stk25         | 59041  | 1  | 93449393  | 93463142  | - |
| 4445 | 1438927_x_at | Region | LOC383587     | 383587 | 1  | 160796026 | 160825619 | + |
| 4446 | 1455065_x_at | Region | LOC231914     | 231914 | 5  | 148052836 | 148073109 | - |
| 4447 | 1427260_a_at | Region | Tpm3          | 59069  | 3  | 89883112  | 89911022  | + |
| 4448 | 1434766_at   | Region | Prkaa2        | 108079 | 4  | 103993895 | 104068774 | - |
| 4449 | 1455373_at   | Region | None          | None   | 5  | 21595010  | 21595623  | - |
| 4450 | 1426946_at   | Region | Ranbp5        | 70572  | 14 | 115481885 | 115518633 | + |
| 4451 | 1418311_at   | Region | Fn3k          | 63828  | 11 | 121256061 | 121271577 | + |
| 4452 | 1417902_at   | Region | Slc19a2       | 116914 | 1  | 164168307 | 164184621 | + |
| 4453 | 1433552_a_at | Region | Polr2b        | 231329 | 5  | 76554743  | 76593569  | + |
| 4454 | 1439159_at   | Region | Rere          | 68703  | 4  | 148898702 | 149114159 | + |
| 4455 | 1455850_at   | Region | 2310003H01Rik | 71885  | 11 | 120190655 | 120195298 | - |
| 4456 | 1419467_at   | Region | Clec14a       | 66864  | 12 | 54996197  | 55000365  | - |
| 4457 | 1424445_at   | Region | Tm4sf5        | 75604  | 11 | 70230935  | 70236830  | + |
| 4458 | 1451716_at   | Region | Mafb          | 16658  | 2  | 159820730 | 159823983 | - |
| 4459 | 1424196_at   | Region | Yipf1         | 230584 | 4  | 106273336 | 106318727 | + |
| 4460 | 1456041_at   | Region | Snx16         | 74718  | 3  | 10419694  | 10441634  | - |
| 4461 | 1436148_at   | Region | None          | None   | 1  | 159835170 | 159835571 | + |
| 4462 | 1436064_x_at | Region | Rps24         | 20088  | 14 | 22859652  | 22865117  | + |
| 4463 | 1424879_at   | Region | Lrch4         | 231798 | 5  | 136579783 | 136591102 | + |
| 4464 | 1424875_at   | Region | Spg20         | 229285 | 3  | 54746476  | 54770293  | + |
| 4465 | 1457832_at   | Region | None          | None   | 2  | 83363245  | 83364571  | + |
| 4466 | 1442185_at   | Region | Stx5a         | 56389  | 19 | 7938367   | 7952189   | + |
| 4467 | 1447776_x_at | Region | Rab6          | 19346  | 7  | 94714439  | 94748311  | + |
| 4468 | 1446543_at   | Region | Gcn11l        | 231659 | 5  | 114676923 | 114736096 | + |
| 4469 | 1429028_at   | Region | Dock11        | 75974  | X  | 30509386  | 30697611  | + |
| 4470 | 1437152_at   | Region | Rkhd3         | 108797 | 7  | 76722819  | 76728094  | + |
| 4471 | 1454671_at   | Region | Insig1        | 231070 | 5  | 26521457  | 26528860  | + |
| 4472 | 1423907_a_at | Region | Ndufs8        | 225887 | 19 | 3697661   | 3701550   | - |
| 4473 | 1435327_at   | Region | AW112037      | 98667  | 1  | 191515786 | 191519464 | + |
| 4474 | 1419954_s_at | Region | Tex27         | 21769  | 17 | 27815127  | 28020060  | + |

|      |              |        |               |        |    |           |           |   |
|------|--------------|--------|---------------|--------|----|-----------|-----------|---|
| 4475 | 1426494_at   | Region | Rg9mtd3       | 69934  | 4  | 45213090  | 45232053  | + |
| 4476 | 1421525_a_at | Region | Birc1e        | 17951  | 13 | 96407496  | 96443102  | - |
| 4477 | 1460554_s_at | Region | Glg1          | 20340  | 8  | 110455266 | 110556791 | - |
| 4478 | 1438853_x_at | Region | Ddx54         | 71990  | 5  | 119764937 | 119780399 | + |
| 4479 | 1426900_at   | Region | Jmjd1c        | 108829 | 10 | 67223447  | 67293285  | + |
| 4480 | 1458708_at   | Region | Brd4          | 57261  | 17 | 30005231  | 30094101  | - |
| 4481 | 1436907_at   | Region | Nav1          | 215690 | 1  | 135289346 | 135436181 | - |
| 4482 | 1430395_at   | Region | Ankrd45       | 73844  | 1  | 161046813 | 161071963 | + |
| 4483 | 1450010_at   | Region | Hsd17b12      | 56348  | 2  | 93737380  | 93862592  | - |
| 4484 | 1441634_at   | Region | Nting1        | 80883  | 3  | 109582822 | 109951623 | - |
| 4485 | 1448604_at   | Region | Uck2          | 80914  | 1  | 167159294 | 167218315 | - |
| 4486 | 1426754_x_at | Region | Ckap4         | 216197 | 10 | 84420966  | 84428436  | - |
| 4487 | 1421143_at   | Region | Diap1         | 13367  | 18 | 38068549  | 38159133  | - |
| 4488 | 1428582_at   | Region | 2010208K18Rik | 72096  | 7  | 127193844 | 127219029 | - |
| 4489 | 1447186_at   | Region | Gm1084        | 381884 | 7  | 39344692  | 39349907  | + |
| 4490 | 1435981_at   | Region | None          | None   | 7  | 43723560  | 43724201  | + |
| 4491 | 1451608_a_at | Region | 1300010A20Rik | 232670 | 6  | 29741353  | 29765655  | + |
| 4492 | 1437023_at   | Region | C530015C18    | 231866 | 5  | 142294090 | 142306832 | + |
| 4493 | 1417723_at   | Region | Ube2j1        | 56228  | 4  | 33310330  | 33329073  | + |
| 4494 | 1428593_at   | Region | 1700029F09Rik | 75623  | 1  | 44382435  | 44398181  | - |
| 4495 | 1425777_at   | Region | Cacnb1        | 12295  | 11 | 97823988  | 97904149  | - |
| 4496 | 1449714_at   | Region | 5730472N09Rik | 108958 | 2  | 30296497  | 30317681  | + |
| 4497 | 1448747_at   | Region | Fbxo32        | 67731  | 15 | 58189095  | 58223887  | - |
| 4498 | 1419123_a_at | Region | Pdgfc         | 54635  | 3  | 80765412  | 80943027  | + |
| 4499 | 1435855_x_at | Region | Aldh18a1      | 56454  | 19 | 40094578  | 40132690  | - |
| 4500 | 1458972_at   | Region | 9330112F22Rik | 319237 | 17 | 26080291  | 26080815  | + |
| 4501 | 1435112_a_at | Region | Atp5h         | 71679  | 11 | 115236790 | 115241012 | - |
| 4502 | 1427909_at   | Region | 2410015M20Rik | 224904 | 17 | 54295903  | 54298222  | - |
| 4503 | 1449251_at   | Region | Ndph          | 17986  | X  | 15124464  | 15150551  | - |
| 4504 | 1415707_at   | Region | Anapc2        | 99152  | 2  | 25204661  | 25218077  | + |
| 4505 | 1416218_x_at | Region | Rpl37a        | 19981  | 1  | 73012971  | 73015366  | + |
| 4506 | 1417407_at   | Region | Fbxl14        | 101358 | 6  | 119912045 | 119914888 | + |
| 4507 | 1440001_at   | Region | C130089L09Rik | 403349 | 12 | 105110808 | 105111442 | + |
| 4508 | 1419301_at   | Region | Fzd4          | 14366  | 7  | 83381899  | 83387590  | + |
| 4509 | 1449066_a_at | Region | Arhgef7       | 54126  | 8  | 11130773  | 11207926  | + |
| 4510 | 1440965_at   | Region | Pigl          | 327942 | 11 | 62184102  | 62239548  | + |
| 4511 | 1449323_a_at | Region | Rpl3          | 27367  | 15 | 80130401  | 80135941  | - |
| 4512 | 1435590_at   | Region | D430047L21Rik | 319896 | 9  | 7212223   | 7213957   | + |
| 4513 | 1451820_at   | Region | Diras1        | 208666 | 10 | 81153435  | 81159222  | - |
| 4514 | 1449816_at   | Region | Sult5a1       | 57429  | 8  | 122524128 | 122539554 | - |
| 4515 | 1437029_at   | Region | Tacr3         | 21338  | 3  | 133712014 | 133817494 | + |
| 4516 | 1433858_at   | Region | Lrrc28        | 67867  | 7  | 61397957  | 61529777  | - |
| 4517 | 1439862_at   | Region | None          | None   | 19 | 18177569  | 18178337  | - |
| 4518 | 1436309_at   | Region | Neto2         | 74513  | 8  | 84912206  | 84973698  | - |
| 4519 | 1434907_at   | Region | Tbpl1         | 237336 | 10 | 22693541  | 22721040  | - |
| 4520 | 1424095_at   | Region | Rtcd1         | 66368  | 3  | 115257493 | 115276637 | - |
| 4521 | 1457494_at   | Region | 1700027H10Rik | 72274  | 3  | 44899129  | 44899832  | + |
| 4522 | 1445061_at   | Region | None          | None   | 14 | 88329672  | 88330445  | - |
| 4523 | 1434244_x_at | Region | Htf9c         | 15547  | 16 | 17019721  | 17024544  | + |
| 4524 | 1428772_at   | Region | Xpot          | 73192  | 10 | 121243639 | 121282407 | - |
| 4525 | 1455439_a_at | Region | Lgals1        | 16852  | 15 | 78978011  | 78981481  | + |
| 4526 | 1430306_a_at | Region | Atp6v1c2      | 68775  | 12 | 16646095  | 16687377  | - |
| 4527 | 1415817_s_at | Region | Cct7          | 12468  | 6  | 85801989  | 85818388  | + |
| 4528 | 1451137_a_at | Region | Brd8          | 78656  | 18 | 34822848  | 34847583  | - |
| 4529 | 1445674_at   | Region | Gm574         | 213948 | 5  | 22848078  | 22856040  | - |
| 4530 | 1446366_at   | Region | Trpc4         | 22066  | 3  | 53790324  | 53952687  | + |
| 4531 | 1457076_at   | Region | Gm693         | 277743 | 4  | 140249514 | 140265434 | + |
| 4532 | 1448447_at   | Region | Vps28         | 66914  | 15 | 76672970  | 76676909  | - |
| 4533 | 1438877_at   | Region | Trpm6         | 225997 | 19 | 17996935  | 18139467  | + |
| 4534 | 1417271_a_at | Region | Eng           | 13805  | 2  | 32578757  | 32614280  | + |
| 4535 | 1437685_x_at | Region | Fmod          | 14264  | 1  | 133888996 | 133898985 | + |
| 4536 | 1434837_at   | Region | Mdc1          | 240087 | 17 | 33558766  | 33575604  | + |
| 4537 | 1457423_at   | Region | A930012M17    | 268777 | 14 | 117843742 | 117864796 | - |
| 4538 | 1422965_at   | Region | Agtrap        | 11610  | 4  | 146569423 | 146580360 | - |
| 4539 | 1435103_x_at | Region | Farslb        | 23874  | 1  | 78713481  | 78777515  | - |



|      |              |        |                     |        |    |           |           |   |
|------|--------------|--------|---------------------|--------|----|-----------|-----------|---|
| 4540 | 1437168_at   | Region | MGI:2661424         | 272009 | 4  | 33487784  | 33512133  | + |
| 4541 | 1415676_a_at | Region | Psmb5               | 19173  | 14 | 49130463  | 49134465  | - |
| 4542 | 1416554_at   | Region | Pdlim1              | 54132  | 19 | 39766556  | 39815854  | - |
| 4543 | 1419702_at   | Region | Taf1a               | 21339  | 1  | 749       | 2328      | + |
| 4544 | 1415840_at   | Region | Elovl5              | 68801  | 9  | 78084592  | 78151807  | + |
| 4545 | 1416733_at   | Region | Mkln1               | 27418  | 6  | 31475825  | 31586464  | + |
| 4546 | 1428423_at   | Region | Pcgf3               | 69587  | 5  | 107537545 | 107579312 | + |
| 4547 | 1423420_at   | Region | Adrb1               | 11554  | 19 | 56308069  | 56309469  | + |
| 4548 | 1449425_at   | Region | Wnt2                | 22413  | 6  | 17972382  | 18013798  | - |
| 4549 | 1442710_at   | Region | Pdlim5              | 56376  | 3  | 141211634 | 141364594 | - |
| 4550 | 1415724_a_at | Region | Cdc42               | 12540  | 4  | 136200964 | 136217395 | - |
| 4551 | 1455804_x_at | Region | Oxct1               | 67041  | 15 | 3809284   | 3936636   | + |
| 4552 | 1428699_at   | Region | Sms                 | 20603  | X  | 151043359 | 151091439 | - |
| 4553 | 1421616_at   | Region | Grin2a              | 14811  | 16 | 9251322   | 9662816   | - |
| 4554 | 1422712_a_at | Region | Ube2i               | 22196  | 17 | 23066362  | 23080142  | - |
| 4555 | 1451113_a_at | Region | Ik                  | 24010  | 18 | 36968481  | 36981400  | + |
| 4556 | 1419592_at   | Region | Unc5c               | 22253  | 3  | 140432729 | 140804799 | + |
| 4557 | 1426457_at   | Region | Slmap               | 83997  | 14 | 24509380  | 24629945  | - |
| 4558 | 1416148_at   | Region | Laptm4b             | 114128 | 15 | 34237699  | 34283968  | + |
| 4559 | 1439666_at   | Region | 2010001J22Rik       | 70113  | 15 | 89430321  | 89431863  | - |
|      |              |        | SFT2 domain         |        |    |           |           |   |
| 4560 | 1435142_at   | Region | containing 2        | 108735 | 1  | 165097432 | 165117255 | - |
| 4561 | 1436119_at   | Region | Aldh1l2             | 216188 | 10 | 83375374  | 83421986  | - |
| 4562 | 1450629_at   | Region | D15ErtD366e         | 65970  | 15 | 99835724  | 99877288  | - |
| 4563 | 1454803_a_at | Region | Hdac11              | 232232 | 6  | 91599688  | 91617556  | + |
| 4564 | 1456880_at   | Region | None                | None   | 5  | 128732859 | 128734156 | + |
| 4565 | 1453126_at   | Region | Lrfr2               | 70530  | 17 | 46458498  | 46623707  | + |
| 4566 | 1424126_at   | Region | Alas1               | 11655  | 9  | 106227522 | 106241451 | - |
| 4567 | 1416775_at   | Region | 2310004L02Rik       | 66349  | 7  | 20784000  | 20790057  | + |
| 4568 | 1448967_at   | Region | Nipsnap3a           | 66536  | 4  | 52927803  | 52937938  | + |
| 4569 | 1419269_at   | Region | Dut                 | 110074 | 2  | 124761335 | 124772461 | + |
| 4570 | 1435415_x_at | Region | Mlp                 | 17357  | 4  | 128540757 | 128543088 | + |
|      |              |        | Xlr3a /// Xlr3b /// |        |    |           |           |   |
| 4571 | 1420357_s_at | Region | MGC76689            | 22445  | X  | 69356679  | 69365564  | + |
| 4572 | 1419588_at   | Region | Spag1               | 26942  | 15 | 36180636  | 36236878  | + |
| 4573 | 1427980_at   | Region | 4933407C03Rik       | 74440  | 8  | 116684557 | 116791688 | + |
| 4574 | 1417408_at   | Region | F3                  | 14066  | 3  | 120502430 | 120513936 | + |
| 4575 | 1454741_s_at | Region | AW547186            | 209497 | X  | 136121461 | 136278281 | + |
| 4576 | 1453729_a_at | Region | Rpl37               | 67281  | 15 | 4902211   | 4904706   | + |
| 4577 | 1457218_at   | Region | 6430510M02Rik       | 319517 | 2  | 37509620  | 37512003  | - |
| 4578 | 1433654_at   | Region | Mgea5               | 76055  | 19 | 45297695  | 45330727  | - |
| 4579 | 1429167_at   | Region | 8430438M01Rik       | 240261 | 18 | 46504298  | 46533757  | - |
| 4580 | 1419170_at   | Region | 2310044D20Rik       | 67698  | 1  | 95085396  | 95106717  | + |
| 4581 | 1423954_at   | Region | C3                  | 12266  | 17 | 54893340  | 54917418  | - |
| 4582 | 1426146_a_at | Region | Chpt1               | 212862 | 10 | 88445367  | 88476119  | - |
| 4583 | 1416332_at   | Region | Cirbp               | 12696  | 10 | 80292754  | 80296566  | + |
| 4584 | 1460653_at   | Region | Sca2                | 20239  | 5  | 120898076 | 120967058 | + |
| 4585 | 1423311_s_at | Region | Tpbp                | 21983  | 9  | 86173432  | 86176811  | + |
| 4586 | 1428328_at   | Region | Nup50               | 18141  | 15 | 84972027  | 84991562  | + |
| 4587 | 1451968_at   | Region | Xrcc5               | 22596  | 1  | 72605227  | 72696612  | + |
| 4588 | 1449579_at   | Region | Sh3yl1              | 24057  | 12 | 27498476  | 27536048  | + |
| 4589 | 1449246_at   | Region | Rap2ip              | 51799  | 11 | 102214763 | 102223640 | + |
| 4590 | 1450688_at   | Region | Rgl2                | 19732  | 17 | 31633637  | 31641430  | + |
| 4591 | 1460032_at   | Region | None                | None   | 8  | 116661675 | 116662076 | + |
| 4592 | 1453285_at   | Region | 2600017H02Rik       | 67020  | 11 | 69122177  | 69123892  | - |
| 4593 | 1426857_a_at | Region | Hsdl2               | 72479  | 4  | 59525139  | 59561516  | + |
| 4594 | 1428806_at   | Region | Csnk1g1             | 214897 | 9  | 66032337  | 66163764  | + |
| 4595 | 1448108_at   | Region | Tde2                | 56442  | 10 | 57778279  | 57794950  | - |
| 4596 | 1448337_at   | Region | 2410003P15Rik       | 56046  | 2  | 155303838 | 155386985 | - |
| 4597 | 1424320_a_at | Region | Traf7               | 224619 | 17 | 22312435  | 22331415  | - |
| 4598 | 1431946_a_at | Region | Apba2bp             | 56846  | 2  | 154001342 | 154012591 | - |
| 4599 | 1456696_x_at | Region | 4932432N11Rik       | 74386  | 13 | 57034424  | 57043384  | + |
| 4600 | 1423724_at   | Region | Zwint               | 52696  | 10 | 72709781  | 72729831  | + |
| 4601 | 1418058_at   | Region | Eitd1               | 170757 | 3  | 150417575 | 150524774 | + |
| 4602 | 1419573_a_at | Region | Lgals1              | 16852  | 15 | 78978011  | 78981481  | + |

|      |              |        |               |        |    |           |           |   |
|------|--------------|--------|---------------|--------|----|-----------|-----------|---|
| 4603 | 1430829_s_at | Region | MGI:1347093   | 26383  | 8  | 90688173  | 90954867  | + |
| 4604 | 1452341_at   | Region | Echs1         | 93747  | 7  | 134504720 | 134515420 | - |
| 4605 | 1416953_at   | Region | Ctgf          | 14219  | 10 | 24570014  | 24573187  | + |
| 4606 | 1439524_at   | Region | Dnajb4        | 67035  | 3  | 151165498 | 151191485 | - |
| 4607 | 1453140_at   | Region | 9030612M13Rik | 208292 | 17 | 30596599  | 30610894  | - |
| 4608 | 1426460_a_at | Region | Ugp2          | 216558 | 11 | 21215937  | 21265268  | - |
| 4609 | 1440030_at   | Region | E330038N15Rik | 240776 | 1  | 140124450 | 140418710 | + |
| 4610 | 1456005_a_at | Region | Bcl2l11       | 12125  | 2  | 127639891 | 127676025 | + |
| 4611 | 1450835_a_at | Region | Gfra4         | 14588  | 2  | 130554029 | 130556535 | - |
| 4612 | 1418967_a_at | Region | St7           | 64213  | 6  | 17732676  | 17926408  | + |
| 4613 | 1432653_at   | Region | 1700008H02Rik | 66325  | 5  | 81372927  | 81374233  | + |
| 4614 | 1421393_at   | Region | Grin2d        | 14814  | 7  | 39917070  | 39951776  | - |
| 4615 | 1450779_at   | Region | Fabp7         | 12140  | 10 | 58050984  | 58054546  | + |
| 4616 | 1445831_at   | Region | None          | None   | 14 | 56192477  | 56193280  | - |
| 4617 | 1429655_at   | Region | Nudcd1        | 67429  | 15 | 44320855  | 44373512  | - |
| 4618 | 1453424_at   | Region | Fyco1         | 17281  | 9  | 123815289 | 123877843 | - |
| 4619 | 1457781_at   | Region | Kcnq1ot1      | 63830  | 7  | 137690089 | 137690789 | - |
| 4620 | 1429709_at   | Region | Pmpcb         | 73078  | 5  | 20153825  | 20209408  | + |
| 4621 | 1416031_s_at | Region | Mcm7          | 17220  | 5  | 137137397 | 137144671 | - |
| 4622 | 1424353_at   | Region | Lrpprc        | 72416  | 17 | 82535095  | 82620363  | - |
| 4623 | 1416863_at   | Region | Abhd8         | 64296  | 8  | 70606574  | 70613515  | - |
| 4624 | 1436523_s_at | Region | 1810022K09Rik | 69126  | 3  | 105830493 | 105830917 | + |
| 4625 | 1418483_a_at | Region | Ggta1         | 14594  | 2  | 35332376  | 35393490  | - |
| 4626 | 1416266_at   | Region | Pdyn          | 18610  | 2  | 129200419 | 129213686 | - |
| 4627 | 1429615_at   | Region | Zfp91         | 109910 | 19 | 11961648  | 11965116  | - |
| 4628 | 1421829_at   | Region | Ak3l1         | 11639  | 4  | 100377949 | 100425900 | + |
| 4629 | 1452915_at   | Region | Prkar2a       | 19087  | 9  | 108741435 | 108795663 | + |
| 4630 | 1418395_at   | Region | 1300013J15Rik | 67473  | 11 | 61069042  | 61103706  | - |
| 4631 | 1422975_at   | Region | Mme           | 17380  | 3  | 62963798  | 63050157  | + |
| 4632 | 1454915_at   | Region | 1110059F07Rik | 98732  | 1  | 184746296 | 184782637 | + |
| 4633 | 1420385_at   | Region | Gna14         | 14675  | 19 | 15659862  | 15834920  | + |
| 4634 | 1423881_at   | Region | D19Ertd703e   | 52036  | 19 | 3243622   | 3364414   | - |
| 4635 | 1424229_at   | Region | Dyrk3         | 226419 | 1  | 130977913 | 130987706 | - |
| 4636 | 1426760_at   | Region | Ipo8          | 320727 | 6  | 149706566 | 149767322 | - |
| 4637 | 1431411_a_at | Region | Rai12         | 54351  | 11 | 69693882  | 69706168  | - |
| 4638 | 1425301_at   | Region | Ncam2         | 17968  | 16 | 80540343  | 80705441  | + |
| 4639 | 1456048_at   | Region | None          | None   | 19 | 36365274  | 36366345  | - |
| 4640 | 1447027_s_at | Region | Lias          | 79464  | 5  | 64193326  | 64211036  | + |
| 4641 | 1417509_at   | Region | Rnf19         | 30945  | 15 | 36241202  | 36267284  | - |
| 4642 | 1426701_at   | Region | 4632419K20Rik | 74349  | 7  | 99490967  | 99512368  | - |
| 4643 | 1433699_at   | Region | Tnfaip3       | 21929  | 10 | 18924810  | 18939261  | - |
| 4644 | 1431045_at   | Region | D12Ertd553e   | 76820  | 12 | 11632753  | 11732017  | + |
| 4645 | 1455617_at   | Region | Lmbrd1        | 68421  | 1  | 24831774  | 25014116  | + |
| 4646 | 1450136_at   | Region | Cd38          | 12494  | 5  | 42625902  | 42669430  | + |
| 4647 | 1448450_at   | Region | Ak2           | 11637  | 4  | 128020427 | 128038642 | + |
| 4648 | 1433676_at   | Region | Prkwnk1       | 232341 | 6  | 120356763 | 120470204 | - |
| 4649 | 1453455_at   | Region | 1810059M14Rik | 75679  | 4  | 150285226 | 150286487 | - |
| 4650 | 1453006_at   | Region | 2610306H15Rik | 72514  | 19 | 36260220  | 36262269  | - |
| 4651 | 1430019_a_at | Region | Hnrpa1        | 15382  | 15 | 103302595 | 103308263 | + |
| 4652 | 1418925_at   | Region | Celsr1        | 12614  | 15 | 85947572  | 86082913  | - |
| 4653 | 1419043_a_at | Region | Iigp1         | 60440  | 18 | 60615121  | 60617960  | + |
| 4654 | 1455419_at   | Region | D630045J12Rik | 330286 | 6  | 38261271  | 38390218  | - |
| 4655 | 1429181_at   | Region | 1700009P17Rik | 75472  | 1  | 171050500 | 171055790 | + |
| 4656 | 1433613_at   | Region | Pank3         | 211347 | 11 | 35563514  | 35580544  | + |
| 4657 | 1437894_at   | Region | Prox1         | 19130  | 1  | 189836615 | 189885751 | - |
| 4658 | 1454840_at   | Region | Mccc2         | 78038  | 13 | 96141411  | 96169595  | - |
| 4659 | 1459268_at   | Region | 5330439C02Rik | 217143 | 11 | 97170518  | 97173164  | - |
| 4660 | 1429519_at   | Region | Fpgt          | 75540  | 3  | 154091927 | 154100383 | - |
| 4661 | 1438493_at   | Region | 4933433K01Rik | 194908 | 11 | 59509527  | 59513274  | - |
| 4662 | 1436198_at   | Region | Prep          | 19072  | 10 | 45184189  | 45275958  | + |
| 4663 | 1432229_a_at | Region | Cdyl2         | 75796  | 8  | 115897616 | 115952915 | - |
| 4664 | 1425786_a_at | Region | Hsf4          | 26386  | 8  | 104565502 | 104571473 | + |
| 4665 | 1450213_at   | Region | Pde7b         | 29863  | 10 | 20324950  | 20654021  | - |
| 4666 | 1460687_at   | Region | 2410195B05Rik | 67956  | 5  | 123611273 | 123633650 | + |
| 4667 | 1444846_at   | Region | D15Ertd529e   | 52510  | 15 | 22867208  | 22867908  | + |

|      |              |        |               |        |      |           |           |      |
|------|--------------|--------|---------------|--------|------|-----------|-----------|------|
| 4668 | 1453475_at   | Region | F730014I05Rik | 228866 | 2    | 164336101 | 164348170 | +    |
| 4669 | 1438256_at   | Region | Eif5a2        | 208691 | 3    | 28198695  | 28216230  | +    |
| 4670 | 1426288_at   | Region | Lrp4          | 228357 | 2    | 91162450  | 91218528  | +    |
| 4671 | 1442369_at   | Region | 4832406H04Rik | 320971 | 10   | 29239506  | 29240396  | +    |
| 4672 | 1452415_at   | Region | Actn1         | 109711 | 12   | 77029036  | 77121075  | -    |
| 4673 | 1460165_at   | Region | Ppp1ca        | 19045  | 19   | 3980964   | 3984209   | +    |
| 4674 | 1422107_at   | Region | 2410066E13Rik | 68235  | 6    | 54826097  | 54844731  | +    |
| 4675 | 1422324_a_at | Region | Pthlh         | 19227  | 6    | 148177711 | 148191017 | -    |
| 4676 | 1433659_at   | Region | None          | None   | 2    | 120701846 | 120713051 | +    |
| 4677 | 1437791_s_at | Region | Eml5          | 319670 | 12   | 94214380  | 94328523  | -    |
|      |              |        | Ero1l ///     |        |      |           |           |      |
| 4678 | 1449324_at   | Region | LOC434220     | 434220 | 7    | 99364931  | 99367214  | +    |
| 4679 | 1442950_at   | Region | A830055N07Rik | 320290 | 14   | 37350411  | 37351222  | -    |
| 4680 | 1431485_at   | Region | 4833447I15Rik | 74844  | 17   | 22269223  | 22273777  | -    |
| 4681 | 1423906_at   | Region | Hsbp1         | 68196  | 8    | 118687933 | 118692324 | +    |
| 4682 | 1433808_at   | Region | D330001F17Rik | 223658 | 15   | 76430179  | 76503272  | +    |
| 4683 | 1446224_at   | Region | Hectd2        | 226098 | 19   | 35897450  | 35963798  | +    |
| 4684 | 1427033_at   | Region | Dnmbp         | 71972  | 19   | 43392373  | 43456795  | -    |
| 4685 | 1459008_at   | Region | None          | None   | NONE | NONE      | NONE      | NONE |
| 4686 | 1452189_at   | Region | 9430077D24Rik | 77305  | 9    | 106164521 | 106184716 | +    |
| 4687 | 1436387_at   | Region | C330006P03Rik | 320588 | 13   | 89544418  | 89545776  | +    |
| 4688 | 1440861_a_at | Region | None          | None   | 7    | 38670996  | 38677042  | +    |
| 4689 | 1449558_at   | Region | F8            | 14069  | X    | 69833385  | 70040696  | -    |
| 4690 | 1435594_at   | Region | Arl6ip2       | 56298  | 17   | 77665786  | 77673524  | -    |
| 4691 | 1438127_at   | Region | LOC552906     | 552906 | 1    | 162638387 | 162639003 | -    |
| 4692 | 1438292_x_at | Region | Adk           | 11534  | 14   | 19417295  | 19813215  | +    |
| 4693 | 1436545_at   | Region | Dtx4          | 207521 | 19   | 11662421  | 11697539  | -    |
| 4694 | 1455854_a_at | Region | Ssh1          | 231637 | 5    | 113052863 | 113104401 | -    |
| 4695 | 1423031_at   | Region | None          | None   | 5    | 31824425  | 31862147  | +    |
| 4696 | 1450397_at   | Region | Mtap1b        | 17755  | 13   | 95613359  | 95705305  | -    |
| 4697 | 1426683_at   | Region | Cnot6         | 104625 | 11   | 49427539  | 49465551  | -    |
| 4698 | 1454703_x_at | Region | Rnu22         | 83673  | 19   | 7920714   | 7922991   | +    |
| 4699 | 1427588_a_at | Region | Dtna          | 13527  | 18   | 23643946  | 23881842  | +    |
| 4700 | 1441700_at   | Region | C230026C11    | 328608 | 15   | 100880057 | 100880317 | +    |
| 4701 | 1448287_at   | Region | Rpo1-3        | 20018  | 5    | 145969234 | 146003052 | +    |
| 4702 | 1434383_at   | Region | Pja2          | 224938 | 17   | 61986425  | 62035635  | -    |
| 4703 | 1446632_at   | Region | Cacnb2        | 12296  | 2    | 14530578  | 14913205  | +    |
| 4704 | 1435774_at   | Region | AV024533      | 106740 | 17   | 13000341  | 13001826  | -    |
| 4705 | 1434724_at   | Region | Usp31         | 76179  | 7    | 115517588 | 115530585 | -    |
| 4706 | 1435344_at   | Region | 1110029I05Rik | 319491 | 9    | 96220964  | 96222611  | +    |
| 4707 | 1451074_at   | Region | Rnf13         | 24017  | 3    | 57378718  | 57475204  | +    |
| 4708 | 1427947_at   | Region | BC028440      | 232987 | 7    | 20845746  | 20851276  | +    |
| 4709 | 1449533_at   | Region | 1810057C19Rik | 67888  | 11   | 89851435  | 89857592  | +    |
| 4710 | 1417122_at   | Region | Vav3          | 57257  | 3    | 109150078 | 109494759 | +    |
| 4711 | 1427154_at   | Region | Krt2-17       | 16681  | 15   | 101869161 | 101876597 | -    |
| 4712 | 1424564_at   | Region | 2410001C21Rik | 66404  | 2    | 171949311 | 171978632 | +    |
| 4713 | 1424443_at   | Region | Tm6sf1        | 107769 | 7    | 75667263  | 75692207  | +    |
| 4714 | 1417220_at   | Region | Fah           | 14085  | 7    | 78439084  | 78459666  | -    |
| 4715 | 1424476_at   | Region | Camkk2        | 207565 | 5    | 121886097 | 121917203 | -    |
| 4716 | 1447522_s_at | Region | Tnks2         | 74493  | 19   | 36161291  | 36235550  | +    |
| 4717 | 1450530_at   | Region | B3galt1       | 26877  | 2    | 67973343  | 67974323  | +    |
| 4718 | 1459469_at   | Region | C78516        | 97147  | NONE | NONE      | NONE      | NONE |
| 4719 | 1451707_s_at | Region | Slc41a3       | 71699  | 6    | 91044196  | 91085644  | +    |
| 4720 | 1456661_at   | Region | Jarid2        | 16468  | 13   | 44305547  | 44495137  | +    |
| 4721 | 1428873_a_at | Region | 4121402D02Rik | 74026  | 11   | 98616603  | 98627514  | +    |
| 4722 | 1434072_at   | Region | Smcr7         | 237781 | 11   | 60454040  | 60458593  | +    |
| 4723 | 1426435_at   | Region | 2810439K08Rik | 72759  | 7    | 83117226  | 83316101  | -    |
| 4724 | 1441036_at   | Region | None          | None   | 3    | 53142021  | 53142715  | +    |
| 4725 | 1437026_at   | Region | BC057893      | 272027 | 4    | 46030668  | 46054332  | -    |
| 4726 | 1446253_at   | Region | Slc18a2       | 214084 | 19   | 58860486  | 58895236  | +    |
| 4727 | 1442381_at   | Region | Mkln1         | 27418  | 6    | 31475825  | 31586464  | +    |
| 4728 | 1448284_a_at | Region | Ndufc1        | 66377  | 3    | 51037443  | 51040919  | -    |
| 4729 | 1452186_at   | Region | Rbm5          | 83486  | 9    | 107808484 | 107838963 | -    |
| 4730 | 1433940_at   | Region | Spag7         | 216873 | 11   | 70389448  | 70394951  | -    |
| 4731 | 1417162_at   | Region | 2310061B02Rik | 69660  | 1    | 74590721  | 74606627  | -    |

|      |              |        |                   |        |    |           |           |   |
|------|--------------|--------|-------------------|--------|----|-----------|-----------|---|
| 4732 | 1442083_at   | Region | 1500011J06Rik     | 208606 | 5  | 122899619 | 122920601 | - |
| 4733 | 1450064_at   | Region | Fmn2              | 54418  | 1  | 174435022 | 174755223 | + |
| 4734 | 1433738_at   | Region | 5730445M16Rik     | 214627 | 8  | 87484565  | 87545069  | + |
| 4735 | 1458245_at   | Region | None              | None   | 4  | 59272841  | 59276418  | - |
| 4736 | 1453139_at   | Region | Nudt12            | 67993  | 17 | 56685627  | 56697548  | - |
| 4737 | 1459871_x_at | Region | 38413             | 224703 | 17 | 31384823  | 31417809  | - |
| 4738 | 1428160_at   | Region | 9330101J02Rik     | 320625 | 7  | 134056422 | 134079630 | - |
| 4739 | 1427236_a_at | Region | Mll5              | 69188  | 5  | 21898353  | 21957234  | + |
| 4740 | 1454200_at   | Region | Zfhx1b            | 24136  | 2  | 44919283  | 45045178  | - |
| 4741 | 1454012_a_at | Region | Parp6             | 67287  | 9  | 59734045  | 59767165  | + |
| 4742 | 1439097_at   | Region | D10Wsu52e         | 28088  | 10 | 85899581  | 85918735  | - |
| 4743 | 1422150_at   | Region | Hmx3              | 15373  | 7  | 125858776 | 125860738 | + |
| 4744 | 1417840_at   | Region | 1500031L02Rik     | 66994  | 16 | 30909173  | 30917425  | + |
| 4745 | 1416354_at   | Region | Rbmx              | 19655  | X  | 52141072  | 52147740  | - |
| 4746 | 1432787_at   | Region | 6720420G18Rik     | 77072  | 5  | 13209250  | 13210354  | - |
| 4747 | 1424433_at   | Region | Msrp2             | 76467  | 2  | 19413646  | 19436980  | + |
| 4748 | 1455048_at   | Region | Igsf3             | 78908  | 3  | 100804224 | 100886780 | + |
| 4749 | 1442739_at   | Region | BC031441          | 240120 | 17 | 53576717  | 53583603  | - |
| 4750 | 1434639_at   | Region | Kbtbd9            | 208439 | 12 | 4250774   | 4550482   | - |
| 4751 | 1435901_at   | Region | Usp40             | 227334 | 1  | 87765405  | 87827652  | - |
| 4752 | 1435251_at   | Region | Snx13             | 217463 | 12 | 31761156  | 31762501  | + |
| 4753 | 1450122_at   | Region | Ptprg             | 19270  | 14 | 10014966  | 10698138  | + |
| 4754 | 1426556_at   | Region | Suhw4             | 235469 | 9  | 72427922  | 72473749  | + |
| 4755 | 1417866_at   | Region | Tnfaip1           | 21927  | 11 | 78248507  | 78261853  | - |
| 4756 | 1455649_at   | Region | Ttc9              | 69480  | 12 | 78486357  | 78523920  | + |
| 4757 | 1452221_a_at | Region | Cxxc1             | 74322  | 18 | 74450441  | 74455720  | + |
| 4758 | 1419583_at   | Region | Cbx4              | 12418  | 11 | 118901248 | 118907234 | - |
| 4759 | 1427984_at   | Region | Senp6             | 215351 | 9  | 80272603  | 80350480  | + |
| 4760 | 1442363_at   | Region | 1110012J17Rik     | 68617  | 17 | 64055405  | 64103991  | - |
| 4761 | 1430197_a_at | Region | Pitpnm2           | 19679  | 5  | 123290016 | 123387759 | - |
| 4762 | 1424614_at   | Region | MGI:2385286       | 233575 | 7  | 96329032  | 96343721  | + |
| 4763 | 1452423_at   | Region | Pclo              | 26875  | 5  | 13968048  | 14249123  | + |
| 4764 | 1420513_at   | Region | Efcab2            | 68226  | 1  | 178360562 | 178437930 | + |
| 4765 | 1429281_at   | Region | 2610008E11Rik     | 72128  | 10 | 79180416  | 79213667  | - |
| 4766 | 1423792_a_at | Region | Cklfsf6           | 67213  | 9  | 114704736 | 114722975 | + |
| 4767 | 1435374_at   | Region | None              | None   | 8  | 115891850 | 115893446 | - |
| 4768 | 1452744_at   | Region | 2210016F16Rik     | 70153  | 13 | 57013547  | 57017878  | - |
| 4769 | 1418337_at   | Region | Rpia              | 19895  | 6  | 71085426  | 71111880  | - |
| 4770 | 1418329_at   | Region | Pgpep1            | 66522  | 8  | 69805459  | 69816029  | - |
| 4771 | 1419551_s_at | Region | Stk39             | 53416  | 2  | 68065847  | 68327381  | - |
| 4772 | 1448646_at   | Region | Wdr12             | 57750  | 1  | 60380183  | 60401193  | - |
| 4773 | 1416010_a_at | Region | Ehd1              | 13660  | 19 | 6065686   | 6088886   | + |
| 4774 | 1433553_at   | Region | Garnl3            | 99326  | 2  | 32918528  | 33019366  | - |
| 4775 | 1459235_at   | Region | None              | None   | 3  | 133027580 | 133028278 | - |
| 4776 | 1428621_a_at | Region | D11Wsu68e         | 28084  | 11 | 101074830 | 101080633 | + |
| 4777 | 1439271_x_at | Region | lk                | 24010  | 18 | 36968481  | 36981400  | + |
| 4778 | 1430089_at   | Region | 5830469G19Rik     | 76093  | 4  | 128847860 | 128849167 | + |
|      |              |        | 1300004G08Rik /// |        |    |           |           |   |
| 4779 | 1428565_at   | Region | LOC545242         | 545242 | 18 | 8736528   | 8739684   | + |
| 4780 | 1442421_at   | Region | None              | None   | 5  | 134880019 | 134880659 | + |
| 4781 | 1458290_at   | Region | R3hdm             | 226412 | 1  | 127946018 | 128080726 | + |
| 4782 | 1417335_at   | Region | Sult2b1           | 54200  | 7  | 39813262  | 39844164  | - |
| 4783 | 1437759_at   | Region | Pfkp              | 56421  | 13 | 6476970   | 6563786   | - |
| 4784 | 1423701_at   | Region | Coasy             | 71743  | 11 | 100903693 | 100907704 | + |
| 4785 | 1450787_at   | Region | Clcn5             | 12728  | X  | 5398413   | 5427626   | - |
| 4786 | 1425926_a_at | Region | Otx2              | 18424  | 14 | 43747109  | 43751810  | - |
| 4787 | 1434831_a_at | Region | Foxo3a            | 56484  | 10 | 42292466  | 42383422  | - |
| 4788 | 1454869_at   | Region | Wdr40b            | 245404 | X  | 39307366  | 39310947  | - |
| 4789 | 1460703_at   | Region | Ascc1             | 69090  | 10 | 59958483  | 60060150  | + |
| 4790 | 1449040_a_at | Region | Sephs2            | 20768  | 7  | 121321610 | 121323787 | - |
| 4791 | 1449336_a_at | Region | Slk               | 20874  | 19 | 47131319  | 47193755  | + |
| 4792 | 1434159_at   | Region | Stk4              | 58231  | 2  | 163531147 | 163612490 | + |
| 4793 | 1426739_at   | Region | Donson            | 60364  | 16 | 90836429  | 90845892  | - |
| 4794 | 1425351_at   | Region | Srxn1             | 76650  | 2  | 151562666 | 151568289 | + |
| 4795 | 1459737_s_at | Region | Ttr               | 22139  | 18 | 20880341  | 20889247  | + |

|      |              |        |               |        |    |           |           |   |
|------|--------------|--------|---------------|--------|----|-----------|-----------|---|
| 4796 | 1419633_at   | Region | Uncx4.1       | 22255  | 5  | 138541401 | 138545671 | + |
| 4797 | 1451466_at   | Region | D16Ertd472e   | 67102  | 16 | 77629000  | 77662117  | - |
| 4798 | 1418078_at   | Region | Psme3         | 19192  | 11 | 101137338 | 101144618 | + |
| 4799 | 1429650_at   | Region | Stk40         | 74178  | 4  | 125131111 | 125167995 | + |
| 4800 | 1435764_a_at | Region | Gemin7        | 69731  | 7  | 16434193  | 16442587  | - |
| 4801 | 1456034_at   | Region | Ttc18         | 76670  | 14 | 18755509  | 18813534  | - |
| 4802 | 1454794_at   | Region | Spg4          | 50850  | 17 | 72144720  | 72194776  | + |
| 4803 | 1456509_at   | Region | 1110032F04Rik | 68725  | 3  | 68516408  | 68540974  | + |
| 4804 | 1449749_s_at | Region | Tfb1m         | 224481 | 17 | 3480942   | 3519462   | - |
| 4805 | 1416362_a_at | Region | Fkbp4         | 14228  | 6  | 129120294 | 129128818 | - |
| 4806 | 1451395_at   | Region | D5Bwg0834e    | 215707 | 5  | 123994698 | 124021886 | - |
| 4807 | 1425371_at   | Region | Polb          | 18970  | 8  | 21382844  | 21407993  | - |
| 4808 | 1437926_at   | Region | E430012M05Rik | 321003 | 15 | 81450988  | 81505688  | + |
| 4809 | 1446990_at   | Region | Nfia          | 18027  | 4  | 96752972  | 97087465  | + |
| 4810 | 1433623_at   | Region | Zfp367        | 238673 | 13 | 61517909  | 61538052  | - |
| 4811 | 1428983_at   | Region | Scx           | 20289  | 15 | 76507726  | 76509749  | + |
| 4812 | 1437283_at   | Region | Tnpo2         | 212999 | 8  | 84307954  | 84326395  | + |
| 4813 | 1452655_at   | Region | Zdhhc2        | 70546  | 8  | 39367458  | 39428485  | + |
| 4814 | 1425414_at   | Region | Ppp1r16b      | 228852 | 2  | 158122367 | 158219842 | + |
| 4815 | 1423413_at   | Region | Ndrg1         | 17988  | 15 | 66953527  | 66993844  | - |
| 4816 | 1455236_x_at | Region | Serf2         | 378702 | 2  | 120963266 | 120964906 | + |
| 4817 | 1457731_at   | Region | Snpc3         | 77634  | 4  | 82403941  | 82453789  | + |
| 4818 | 1441312_at   | Region | Cnrm1         | 83674  | 19 | 42985617  | 43040169  | + |
| 4819 | 1424113_at   | Region | Lamb1-1       | 16777  | 12 | 27840552  | 27905646  | + |
| 4820 | 1426343_at   | Region | 1300006C19Rik | 68292  | 9  | 115225956 | 115293786 | - |
| 4821 | 1451225_at   | Region | Ptpn11        | 19247  | 5  | 120282348 | 120343136 | - |
| 4822 | 1448621_a_at | Region | Smpd1         | 20597  | 7  | 99666853  | 99670820  | + |
| 4823 | 1451241_at   | Region | Lamb1-1       | 16777  | 12 | 27840552  | 27905646  | + |
| 4824 | 1426313_at   | Region | Bre           | 107976 | 5  | 30156988  | 30543677  | + |
| 4825 | 1426923_at   | Region | Hrb           | 15463  | 1  | 83168589  | 83225381  | + |
| 4826 | 1441989_at   | Region | Bnip2         | 12175  | 9  | 70120357  | 70139177  | + |
| 4827 | 1453732_at   | Region | 6230416A05Rik | 76137  | 13 | 43101452  | 43122631  | - |
| 4828 | 1422341_s_at | Region | Lypla3        | 192654 | 8  | 105446246 | 105460562 | - |
| 4829 | 1421997_s_at | Region | Itga3         | 16400  | 11 | 94865569  | 94897801  | - |
| 4830 | 1423113_a_at | Region | Ube2d3        | 66105  | 3  | 134321860 | 134350243 | + |
| 4831 | 1420377_at   | Region | St8sia2       | 20450  | 7  | 67831801  | 67906341  | - |
| 4832 | 1441347_at   | Region | Hrbl          | 231801 | 5  | 136601442 | 136635293 | - |
| 4833 | 1456120_at   | Region | 3110001I20Rik | 70354  | 2  | 125250846 | 125296723 | - |
| 4834 | 1451868_at   | Region | Kcnj6         | 16522  | 16 | 94170119  | 94405052  | - |
| 4835 | 1416565_at   | Region | Cox6b1        | 110323 | 7  | 26029666  | 26038843  | - |
| 4836 | 1419011_at   | Region | Cryba2        | 12958  | 1  | 75194153  | 75197344  | - |
| 4837 | 1427930_at   | Region | Pdxk          | 216134 | 10 | 78549713  | 78575725  | - |
| 4838 | 1438224_at   | Region | Zswim5        | 74464  | 4  | 115947387 | 115948169 | + |
| 4839 | 1456013_x_at | Region | Slc35a4       | 67843  | 18 | 36903357  | 36907622  | + |
| 4840 | 1424224_at   | Region | Asb8          | 78541  | 15 | 98210202  | 98221206  | - |
| 4841 | 1440179_x_at | Region | LOC268291     | 268291 | 10 | 31542086  | 31649384  | - |
| 4842 | 1460439_at   | Region | BC033915      | 70661  | 9  | 46026130  | 46236394  | + |
| 4843 | 1451068_s_at | Region | Rps25         | 75617  | 9  | 44396569  | 44399261  | + |
| 4844 | 1450901_a_at | Region | AW011752      | 104570 | 11 | 29067786  | 29113926  | + |
| 4845 | 1459793_s_at | Region | None          | None   | 6  | 146063689 | 146063978 | + |
| 4846 | 1454805_at   | Region | Wtap          | 60532  | 17 | 11539853  | 11559714  | + |
| 4847 | 1427512_a_at | Region | Lama3         | 16774  | 18 | 12521625  | 12770367  | + |
| 4848 | 1439824_at   | Region | Chm           | 12662  | X  | 107440914 | 107585000 | - |
| 4849 | 1459987_s_at | Region | Cct3          | 12462  | 3  | 88040999  | 88065630  | + |
| 4850 | 1418290_a_at | Region | Ezh1          | 14055  | 11 | 101012203 | 101049035 | - |
| 4851 | 1431200_a_at | Region | Zcsl2         | 105638 | 14 | 30212767  | 30217780  | - |
| 4852 | 1438140_a_at | Region | Zfp64         | 22722  | 2  | 168434104 | 168463992 | - |
| 4853 | 1454973_at   | Region | Atf7ip        | 54343  | 6  | 137280522 | 137369083 | + |
| 4854 | 1456423_at   | Region | Mbd5          | 109241 | 2  | 49178095  | 49249231  | + |
| 4855 | 1433489_s_at | Region | Fgfr2         | 14183  | 7  | 124341981 | 124389452 | - |
| 4856 | 1415891_at   | Region | Suclg1        | 56451  | 6  | 73586370  | 73614579  | + |
| 4857 | 1424635_at   | Region | Eef1a1        | 13627  | 9  | 78678990  | 78682232  | - |
| 4858 | 1452256_at   | Region | 1110002N22Rik | 68550  | 11 | 79862341  | 79867783  | - |
| 4859 | 1438011_at   | Region | Pcyt1a        | 13026  | 16 | 31261076  | 31281386  | + |
| 4860 | 1430274_a_at | Region | Stard3nl      | 76205  | 13 | 18839040  | 18877114  | - |

|      |              |        |               |        |    |           |           |   |
|------|--------------|--------|---------------|--------|----|-----------|-----------|---|
| 4861 | 1424112_at   | Region | Igf2r         | 16004  | 17 | 11321447  | 11408701  | - |
| 4862 | 1455244_at   | Region | Daam1         | 208846 | 12 | 68668036  | 68829803  | + |
| 4863 | 1450394_at   | Region | Golph3        | 66629  | 15 | 12132755  | 12162746  | + |
| 4864 | 1451019_at   | Region | Ctsf          | 56464  | 19 | 4643919   | 4649702   | + |
| 4865 | 1450750_a_at | Region | Nr4a2         | 18227  | 2  | 57033695  | 57040794  | - |
| 4866 | 1451479_a_at | Region | Tmem53        | 68777  | 4  | 116210894 | 116227485 | + |
| 4867 | 1429778_at   | Region | Optrn         | 71648  | 2  | 4937914   | 4981210   | - |
| 4868 | 1438427_at   | Region | 4932442K08Rik | 67544  | 17 | 13399931  | 13435680  | + |
| 4869 | 1441777_at   | Region | Emx1          | 13796  | 6  | 85553737  | 85554185  | + |
| 4870 | 1423426_at   | Region | 1300012G16Rik | 71772  | 5  | 119635089 | 119655425 | - |
| 4871 | 1457468_at   | Region | 5430432P15Rik | 74493  | 19 | 36161291  | 36235550  | + |
| 4872 | 1457141_at   | Region | None          | None   | 7  | 91771016  | 91771272  | - |
| 4873 | 1449354_at   | Region | U2af1-rs1     | 22183  | 11 | 22866827  | 22869698  | + |
| 4874 | 1457050_at   | Region | 1700129O19Rik | 78643  | 13 | 48940434  | 48940769  | - |
| 4875 | 1424238_at   | Region | Sirt7         | 209011 | 11 | 120439464 | 120446060 | - |
| 4876 | 1451972_at   | Region | Glcc1         | 170772 | 6  | 8234651   | 8573400   | + |
| 4877 | 1432555_at   | Region | Whrn          | 73750  | 4  | 62506101  | 62587142  | - |
| 4878 | 1425287_at   | Region | Zfp189        | 230162 | 4  | 49437099  | 49447415  | + |
| 4879 | 1441790_at   | Region | Lrrn6a        | 235402 | 9  | 56731964  | 56798742  | - |
| 4880 | 1451346_at   | Region | Mtap          | 66902  | 4  | 88123618  | 88167275  | + |
| 4881 | 1457955_at   | Region | Gga2          | 74105  | 7  | 115864580 | 115899025 | - |
| 4882 | 1454798_at   | Region | B930007L02Rik | 321006 | 9  | 106946699 | 106948923 | - |
| 4883 | 1429571_a_at | Region | Spaca1        | 67652  | 4  | 34307107  | 34328860  | - |
| 4884 | 1427676_a_at | Region | Grik1         | 14805  | 16 | 87069420  | 87213311  | - |
| 4885 | 1417796_at   | Region | Gps2          | 56310  | 11 | 69639850  | 69642249  | + |
| 4886 | 1436949_a_at | Region | Tceb2         | 67673  | 17 | 21626920  | 21631289  | - |
| 4887 | 1428436_at   | Region | 2700023B17Rik | 67070  | 7  | 15609988  | 15654960  | - |
| 4888 | 1425492_at   | Region | Bmpr1a        | 12166  | 14 | 32547251  | 32638735  | - |
| 4889 | 1460399_at   | Region | BC018601      | 104479 | 11 | 5423674   | 5436942   | - |
| 4890 | 1429784_at   | Region | C130032J12Rik | 218975 | 14 | 42400908  | 42402444  | + |
| 4891 | 1456429_at   | Region | Malt1         | 240354 | 18 | 65664223  | 65712018  | + |
| 4892 | 1451023_at   | Region | Hcn3          | 15168  | 3  | 88903248  | 88916630  | - |
| 4893 | 1426329_s_at | Region | Baalc         | 118452 | 15 | 38833124  | 38850257  | + |
| 4894 | 1447805_s_at | Region | D11Ertd730e   | 193116 | 11 | 43186568  | 43200818  | + |
| 4895 | 1419532_at   | Region | Il1r2         | 16178  | 1  | 40379307  | 40419909  | + |
| 4896 | 1456405_at   | Region | 6720461J16Rik | 269399 | 2  | 180374922 | 180375704 | - |
| 4897 | 1427025_at   | Region | Mtmr7         | 54384  | 8  | 39494737  | 39579044  | - |
| 4898 | 1455680_at   | Region | 9630025H16Rik | 319878 | 3  | 68737668  | 68739211  | - |
| 4899 | 1460326_at   | Region | Pik3ca        | 18706  | 3  | 31844384  | 31871009  | + |
| 4900 | 1452268_at   | Region | 2810485I05Rik | 72826  | 9  | 13664776  | 13683571  | + |
| 4901 | 1451422_at   | Region | Myo18a        | 360013 | 11 | 77502924  | 77591639  | + |
| 4902 | 1451382_at   | Region | 1810008K03Rik | 69065  | 2  | 118865105 | 118868230 | + |
| 4903 | 1416400_at   | Region | Pycl          | 66194  | 15 | 75966546  | 75971629  | - |
| 4904 | 1436292_a_at | Region | Oaz1          | 18245  | 10 | 80958712  | 80961345  | + |
| 4905 | 1447623_s_at | Region | None          | None   | 12 | 47079899  | 47080196  | - |
| 4906 | 1436867_at   | Region | Srl           | 106393 | 16 | 4151806   | 4194573   | - |
| 4907 | 1421786_at   | Region | Ppp3r1        | 19058  | 11 | 17087637  | 17089902  | + |
| 4908 | 1420609_at   | Region | 38418         | 57438  | 2  | 60065336  | 60103785  | + |
| 4909 | 1449088_at   | Region | Fbp2          | 14120  | 13 | 534       | 13173     | + |
| 4910 | 1424210_at   | Region | Spfh1         | 226144 | 19 | 43579353  | 43613932  | - |
| 4911 | 1416849_at   | Region | D10Ertd214e   | 52637  | 10 | 71384461  | 71398816  | - |
| 4912 | 1423902_s_at | Region | Arhgef12      | 69632  | 9  | 42922812  | 43064327  | - |
| 4913 | 1455424_at   | Region | Wnk2          | 75607  | 13 | 48638624  | 48748243  | - |
| 4914 | 1435620_at   | Region | 1190002J23Rik | 68874  | 1  | 171288622 | 171289723 | - |
| 4915 | 1435211_at   | Region | Ttc12         | 235330 | 9  | 49475000  | 49524266  | - |
| 4916 | 1419350_at   | Region | Hook2         | 170833 | 8  | 84258797  | 84273699  | + |
| 4917 | 1438073_at   | Region | None          | None   |    | 165746    | 166396    | - |
| 4918 | 1434335_at   | Region | AI317237      | 239667 | 15 | 100211934 | 100273204 | + |
| 4919 | 1456272_at   | Region | 2900045N06Rik | 72895  | 6  | 113640716 | 113716498 | + |
| 4920 | 1416265_at   | Region | Capn10        | 23830  | 1  | 92762343  | 92775432  | + |
|      |              |        | Stard13 ///   |        |    |           |           |   |
| 4921 | 1452604_at   | Region | LOC547385     | 243362 | 5  | 149978354 | 150130919 | - |
| 4922 | 1428406_s_at | Region | Hcfc1r1       | 353502 | 17 | 21475788  | 21477704  | + |
| 4923 | 1427104_at   | Region | Zfp612        | 234725 | 8  | 109377438 | 109387872 | + |
| 4924 | 1424018_at   | Region | Hint1         | 15254  | 11 | 54619279  | 54623337  | + |

|      |              |        |               |        |    |           |           |   |
|------|--------------|--------|---------------|--------|----|-----------|-----------|---|
| 4925 | 1437467_at   | Region | Alcam         | 11658  | 16 | 51168811  | 51372049  | - |
| 4926 | 1460586_at   | Region | Egfl4         | 269878 | 7  | 20497229  | 20546922  | + |
| 4927 | 1453689_at   | Region | Fance         | 72775  | 17 | 26105507  | 26123342  | + |
| 4928 | 1420286_at   | Region | None          | None   | 8  | 83678088  | 83678241  | - |
| 4929 | 1452263_at   | Region | Slc35f4       | 75288  | 14 | 44388213  | 44617528  | - |
| 4930 | 1453032_at   | Region | 2610109B12Rik | 70452  | 1  | 55454959  | 55456058  | + |
| 4931 | 1453677_a_at | Region | Derl3         | 70377  | 10 | 75995138  | 75997681  | + |
| 4932 | 1417390_at   | Region | Xab1          | 74254  | 5  | 29953699  | 29970565  | + |
| 4933 | 1439305_at   | Region | None          | None   | X  | 98178992  | 98179701  | - |
| 4934 | 1448115_at   | Region | Htf9c         | 15547  | 16 | 17019721  | 17024544  | + |
| 4935 | 1417471_s_at | Region | D1Erd622e     | 52392  | 1  | 97421426  | 97439499  | - |
| 4936 | 1429534_a_at | Region | Immt          | 76614  | 6  | 72203510  | 72209365  | + |
| 4937 | 1416773_at   | Region | Wee1          | 22390  | 7  | 103974933 | 103996157 | + |
| 4938 | 1449571_at   | Region | Trhr          | 22045  | 15 | 44141857  | 44181536  | + |
| 4939 | 1417947_at   | Region | Pcna          | 18538  | 2  | 131763139 | 131767033 | - |
| 4940 | 1442030_at   | Region | None          | None   | 11 | 120408231 | 120409293 | - |
| 4941 | 1453314_x_at | Region | None          | None   | 16 | 89876348  | 89884408  | - |
| 4942 | 1417060_at   | Region | Ppp1r11       | 76497  | 17 | 34708791  | 34711487  | - |
| 4943 | 1457358_at   | Region | Mrg1          | 17536  | 2  | 115376917 | 115578960 | - |
| 4944 | 1418870_at   | Region | 4930579J09Rik | 67752  | 19 | 9670754   | 9679394   | - |
| 4945 | 1439969_at   | Region | 4930500O05Rik | 242409 | 4  | 43584814  | 43606284  | + |
| 4946 | 1442001_at   | Region | Prkab2        | 108097 | 3  | 97153614  | 97159355  | + |
| 4947 | 1436664_a_at | Region | Slc35a2       | 22232  | X  | 6123184   | 6133345   | + |
| 4948 | 1423744_x_at | Region | Eif2s3x       | 26905  | X  | 88849367  | 88873309  | - |
| 4949 | 1425677_a_at | Region | Ank1          | 11733  | 8  | 21812854  | 21905075  | + |
| 4950 | 1449325_at   | Region | Fads2         | 56473  | 19 | 9260661   | 9298000   | - |
| 4951 | 1440308_at   | Region | None          | None   | 4  | 113918241 | 113918897 | - |
| 4952 | 1428548_at   | Region | Pak4          | 70584  | 7  | 23964692  | 24004019  | - |
| 4953 | 1448490_at   | Region | Adck4         | 76889  | 7  | 22607050  | 22630916  | + |
| 4954 | 1455590_at   | Region | Nqo2          | 18105  | 13 | 33496423  | 33520103  | + |
| 4955 | 1421164_a_at | Region | Arhgef1       | 16801  | 7  | 20020972  | 20104618  | + |
| 4956 | 1434498_at   | Region | Gm1673        | 381633 | 5  | 32471754  | 32473272  | + |
| 4957 | 1458644_at   | Region | Al661708      | 100717 | 5  | 123139455 | 123139928 | + |
| 4958 | 1429469_at   | Region | A930013F10Rik | 68074  | 8  | 21388966  | 21390156  | - |
| 4959 | 1434161_at   | Region | 5830457H20Rik | 217708 | 12 | 81319855  | 81399880  | + |
| 4960 | 1434995_s_at | Region | Dedd          | 21945  | 1  | 171267091 | 171270454 | + |
| 4961 | 1455946_x_at | Region | Tmsb10        | 19240  | 6  | 20039912  | 20040386  | + |
| 4962 | 1424361_at   | Region | BC019943      | 234138 | 8  | 29932839  | 29943872  | + |
| 4963 | 1418242_at   | Region | Faf1          | 14084  | 4  | 108635532 | 108922865 | + |
| 4964 | 1460400_at   | Region | Spg4          | 50850  | 17 | 72144720  | 72194776  | + |
| 4965 | 1460483_at   | Region | 2610034E01Rik | 69236  | 10 | 72713044  | 72713826  | + |
| 4966 | 1428747_at   | Region | 1110007F05Rik | 71787  | 4  | 131272654 | 131290416 | - |
| 4967 | 1428132_at   | Region | Cdc42se1      | 57912  | 3  | 94716611  | 94724240  | + |
| 4968 | 1452418_at   | Region | 1200016E24Rik | 319202 | 4  | 82526160  | 82526678  | - |
| 4969 | 1435783_at   | Region | B230112C05Rik | 320557 | 13 | 93256692  | 93318815  | + |
| 4970 | 1436804_s_at | Region | Scyl1         | 78891  | 19 | 5547217   | 5560191   | - |
| 4971 | 1436307_at   | Region | Myo9a         | 270163 | 9  | 59868073  | 60046149  | + |
| 4972 | 1428283_at   | Region | Cyp2s1        | 74134  | 7  | 20967259  | 20981313  | - |
| 4973 | 1440359_at   | Region | 1700012H17Rik | 242297 | 4  | 5571325   | 5727090   | + |
| 4974 | 1425262_at   | Region | Cebpg         | 12611  | 7  | 30201783  | 30211794  | - |
| 4975 | 1438007_at   | Region | Al851790      | 268354 | 10 | 122955023 | 123432354 | + |
| 4976 | 1419650_at   | Region | Zfr           | 22763  | 15 | 11948204  | 11996199  | + |
| 4977 | 1433943_at   | Region | BC063749      | 414801 | 19 | 47445900  | 47470581  | - |
| 4978 | 1447447_s_at | Region | Srrm1         | 51796  | 4  | 134203290 | 134234393 | - |
| 4979 | 1429841_at   | Region | 3000002B06Rik | 70417  | 18 | 57349956  | 57514042  | + |
| 4980 | 1436425_at   | Region | Ankrd38       | 242553 | 4  | 97729971  | 97792610  | - |
| 4981 | 1435779_at   | Region | Cep1          | 26920  | 2  | 35064394  | 35110984  | + |
| 4982 | 1431232_a_at | Region | Mga           | 29808  | 2  | 119416522 | 119478814 | + |
| 4983 | 1438630_x_at | Region | Mat2a         | 232087 | 6  | 72764773  | 72771532  | - |
| 4984 | 1450876_at   | Region | Cfh           | 12628  | 1  | 139935794 | 140062362 | - |
| 4985 | 1448517_at   | Region | Timm22        | 56322  | 11 | 76132848  | 76141950  | + |
| 4986 | 1443941_at   | Region | LOC433886     | 433886 | 5  | 51185451  | 51186441  | - |
| 4987 | 1423095_s_at | Region | Crbn          | 58799  | 6  | 107274263 | 107296083 | - |
| 4988 | 1417424_at   | Region | Ier3ip1       | 66191  | 18 | 77051756  | 77063320  | + |
| 4989 | 1439717_at   | Region | B230362M20Rik | 320835 | 7  | 51449539  | 51659259  | - |

|      |              |        |               |        |    |           |           |   |
|------|--------------|--------|---------------|--------|----|-----------|-----------|---|
| 4990 | 1421823_a_at | Region | Ppp2cb        | 19053  | 8  | 32405226  | 32425404  | + |
| 4991 | 1433735_a_at | Region | 9630015D15Rik | 100201 | 4  | 15192785  | 15212331  | + |
| 4992 | 1423063_at   | Region | Dnmt3a        | 13435  | 12 | 3001834   | 3066656   | + |
| 4993 | 1456694_x_at | Region | Ptpn6         | 15170  | 6  | 125376099 | 125388499 | - |
| 4994 | 1424133_at   | Region | 6530411B15Rik | 103743 | 11 | 80536074  | 80547692  | + |
| 4995 | 1437389_x_at | Region | None          | None   | 4  | 128741972 | 128742327 | - |
| 4996 | 1429555_at   | Region | 1110019C08Rik | 224250 | 16 | 57715966  | 57722159  | + |
| 4997 | 1445406_at   | Region | C77494        | 97789  | 12 | 82097027  | 82097664  | + |
| 4998 | 1421391_at   | Region | Vipr2         | 22355  | 12 | 111840931 | 111908508 | + |
| 4999 | 1416590_a_at | Region | Rab34         | 19376  | 11 | 77914493  | 77917847  | + |
| 5000 | 1439741_x_at | Region | Al481316      | 98383  | 1  | 167156103 | 167156616 | - |
| 5001 | 1431752_a_at | Region | 2900073H19Rik | 68205  | 2  | 29759551  | 29777158  | + |
| 5002 | 1455319_x_at | Region | Rps8          | 20116  | 4  | 116112741 | 116115037 | - |
| 5003 | 1438143_s_at | Region | None          | None   | 5  | 120963827 | 120967071 | + |
| 5004 | 1426403_at   | Region | Actr1b        | 226977 | 1  | 36993793  | 37004516  | - |
| 5005 | 1424559_at   | Region | AW060207      | 231571 | 5  | 106668184 | 106732285 | + |
| 5006 | 1423407_a_at | Region | Fbln2         | 14115  | 6  | 91655737  | 91715413  | + |
| 5007 | 1436756_x_at | Region | Hadhsc        | 15107  | 3  | 130163431 | 130202003 | - |
| 5008 | 1451420_at   | Region | 2610204L23Rik | 67163  | 11 | 106021555 | 106037392 | - |
| 5009 | 1419575_s_at | Region | Zfp292        | 30046  | 4  | 35020884  | 35026191  | - |
| 5010 | 1421060_at   | Region | Mllt1         | 64144  | 17 | 54582533  | 54625310  | - |
| 5011 | 1452237_at   | Region | Hrb           | 15463  | 1  | 83168589  | 83225381  | + |
| 5012 | 1426569_a_at | Region | Frk           | 14302  | 10 | 34545676  | 34672847  | + |
| 5013 | 1425291_at   | Region | Foxj1         | 15223  | 11 | 116151797 | 116156440 | - |
| 5014 | 1450691_at   | Region | Caskin2       | 140721 | 11 | 115620445 | 115634685 | - |
| 5015 | 1428441_at   | Region | 1500009M05Rik | 67006  | 3  | 134289421 | 134306505 | - |
| 5016 | 1435004_at   | Region | Pank4         | 269614 | 4  | 153456495 | 153473235 | + |
| 5017 | 1434572_at   | Region | Hdac9         | 79221  | 12 | 30981181  | 30981672  | - |
| 5018 | 1419935_s_at | Region | Csnk2a2       | 13000  | 8  | 94726673  | 94766378  | - |
| 5019 | 1424515_at   | Region | B230354K17Rik | 320063 | 17 | 42944253  | 42952945  | + |
| 5020 | 1438176_x_at | Region | 1110031B06Rik | 67826  | 11 | 59132779  | 59175585  | - |
| 5021 | 1421217_a_at | Region | Lgals9        | 16859  | 11 | 78689054  | 78710490  | - |
| 5022 | 1456084_x_at | Region | Fmod          | 14264  | 1  | 133888996 | 133898985 | + |
| 5023 | 1418025_at   | Region | Bhlhb2        | 20893  | 6  | 109163628 | 109169924 | + |
| 5024 | 1455194_at   | Region | None          | None   | 15 | 89516283  | 89517342  | + |
| 5025 | 1452153_at   | Region | Fbxo18        | 50755  | 2  | 11658587  | 11693536  | - |
| 5026 | 1426863_at   | Region | RbmX          | 19655  | X  | 52141072  | 52147740  | - |
| 5027 | 1460691_at   | Region | Zfp598        | 213753 | 17 | 22474097  | 22486361  | + |
| 5028 | 1454815_at   | Region | Sertad2       | 58172  | 11 | 20438127  | 20543916  | + |
| 5029 | 1449448_at   | Region | Med9          | 192191 | 11 | 59673892  | 59686765  | + |
| 5030 | 1435638_at   | Region | None          | None   | 7  | 20409114  | 20418683  | - |
| 5031 | 1427958_at   | Region | Abhd10        | 213012 | 16 | 44615021  | 44627461  | - |
| 5032 | 1426948_at   | Region | Tpr           | 108989 | 1  | 150229615 | 150286691 | + |
| 5033 | 1450906_at   | Region | Plxnc1        | 54712  | 10 | 94767461  | 94918749  | - |
| 5034 | 1419299_at   | Region | 2010012O05Rik | 66439  | 19 | 46236473  | 46250119  | + |
| 5035 | 1418296_at   | Region | Fxyd5         | 18301  | 7  | 26440973  | 26450456  | - |
| 5036 | 1439649_at   | Region | Adc           | 242669 | 4  | 127959259 | 127989530 | - |
| 5037 | 1457687_at   | Region | Bcl2          | 12043  | 1  | 106479000 | 106655083 | - |
| 5038 | 1424771_at   | Region | E130307C13    | 232440 | 6  | 137580120 | 137581870 | + |
| 5039 | 1449493_at   | Region | InsI5         | 23919  | 4  | 101976777 | 101985633 | - |
| 5040 | 1436071_at   | Region | Ankrd26       | 232339 | 6  | 118934772 | 118994843 | - |
| 5041 | 1446448_at   | Region | Pias1         | 56469  | 9  | 63002575  | 63103377  | - |
| 5042 | 1444978_at   | Region | None          | None   | 6  | 99388128  | 99389025  | - |
| 5043 | 1423264_at   | Region | Bop1          | 12181  | 15 | 76503230  | 76527558  | - |
| 5044 | 1429678_at   | Region | 5730508B09Rik | 70617  | 3  | 126755462 | 126781211 | - |
| 5045 | 1439830_at   | Region | Map3k5        | 26408  | 10 | 19860944  | 20067353  | + |
| 5046 | 1427195_at   | Region | None          | None   | 18 | 14383968  | 14385252  | + |
| 5047 | 1424023_at   | Region | BC005752      | 233189 | 7  | 37747538  | 37754019  | + |
| 5048 | 1416907_at   | Region | Tsn           | 22099  | 1  | 118048034 | 118060649 | - |
| 5049 | 1452971_at   | Region | Upf3a         | 67031  | 8  | 13164227  | 13177336  | + |
| 5050 | 1429196_at   | Region | Rabgap1l      | 29809  | 1  | 160161852 | 160697585 | - |
| 5051 | 1439364_a_at | Region | Mmp2          | 17390  | 8  | 92114446  | 92140538  | + |
| 5052 | 1420998_at   | Region | Etv5          | 104156 | 16 | 21153380  | 21211575  | - |
| 5053 | 1438051_at   | Region | D3ErtD789e    | 51938  | 3  | 33256108  | 33288047  | - |
| 5054 | 1423518_at   | Region | Csk           | 12988  | 9  | 57740570  | 57759104  | - |



|      |              |        |               |        |    |           |           |   |
|------|--------------|--------|---------------|--------|----|-----------|-----------|---|
| 5055 | 1452158_at   | Region | Eprs          | 107508 | 1  | 184861496 | 184926808 | + |
| 5056 | 1419158_a_at | Region | Harsl         | 70791  | 18 | 37007045  | 37016327  | + |
| 5057 | 1426414_a_at | Region | Rnf7          | 19823  | 9  | 96369942  | 96420174  | - |
| 5058 | 1420501_at   | Region | Dnajc1        | 13418  | 2  | 18259145  | 18434517  | - |
| 5059 | 1417675_a_at | Region | Mdn1          | 100019 | 4  | 32935912  | 32975347  | + |
| 5060 | 1448659_at   | Region | Casp7         | 12369  | 19 | 55981748  | 56027579  | + |
| 5061 | 1448775_at   | Region | LOC547362     | 547362 | 1  | 143299    | 165189    | + |
| 5062 | 1454952_s_at | Region | B130055D15Rik | 78658  | 9  | 26924144  | 26989070  | + |
| 5063 | 1422579_at   | Region | Hspe1         | 15528  | 1  | 55389476  | 55392465  | + |
| 5064 | 1453567_s_at | Region | 2810441K11Rik | 68642  | 19 | 9746963   | 9752737   | - |
| 5065 | 1418988_at   | Region | Pex7          | 18634  | 10 | 19786688  | 19833926  | - |
| 5066 | 1438568_at   | Region | Mrgpre        | 244238 | 7  | 138192261 | 138198214 | - |
| 5067 | 1423127_at   | Region | Impa1         | 55980  | 3  | 10315087  | 10332919  | - |
| 5068 | 1445567_at   | Region | Gap43         | 14432  | 16 | 41113620  | 41205719  | - |
| 5069 | 1440586_at   | Region | B430203I24Rik | 97874  | 13 | 110512917 | 110513609 | + |
| 5070 | 1428524_at   | Region | 2310051N18Rik | 71941  | 8  | 10886405  | 10928442  | - |
| 5071 | 1416330_at   | Region | Cd81          | 12520  | 7  | 137465814 | 137480943 | + |
| 5072 | 1435813_at   | Region | Mypn          | 68802  | 10 | 63080660  | 63168856  | - |
| 5073 | 1433893_s_at | Region | Spag5         | 54141  | 11 | 78027295  | 78048113  | + |
| 5074 | 1439572_at   | Region | R3hdm         | 226412 | 1  | 127946018 | 128080726 | + |
| 5075 | 1439640_at   | Region | None          | None   | 4  | 135239931 | 135240704 | + |
| 5076 | 1424925_at   | Region | Sec63         | 140740 | 10 | 42868086  | 42935647  | + |
| 5077 | 1436318_at   | Region | Tardbp        | 230908 | 4  | 147104744 | 147119358 | - |
| 5078 | 1441052_at   | Region | 2310035C23Rik | 227446 | 1  | 105555177 | 105695178 | + |
| 5079 | 1455019_x_at | Region | Ckap4         | 216197 | 10 | 84420965  | 84421362  | - |
| 5080 | 1423937_at   | Region | Kctd5         | 69259  | 17 | 21851732  | 21877431  | - |
| 5081 | 1459009_at   | Region | Utrn          | 22288  | 10 | 12263109  | 12646998  | - |
| 5082 | 1426430_at   | Region | Jag2          | 16450  | 12 | 108384687 | 108405592 | - |
| 5083 | 1436185_at   | Region | AI314180      | 230249 | 4  | 58743479  | 58856174  | - |
| 5084 | 1432184_a_at | Region | 2610204M08Rik | 70435  | 12 | 108084044 | 108094944 | + |
| 5085 | 1418912_at   | Region | Plxdc2        | 67448  | 2  | 16282594  | 16678387  | + |
| 5086 | 1442312_at   | Region | Tbl1xr1       | 81004  | 3  | 21419728  | 21554694  | + |
| 5087 | 1426586_at   | Region | Slc25a11      | 67863  | 11 | 70369854  | 70372651  | - |
| 5088 | 1460031_at   | Region | Gpr45         | 93690  | 1  | 43247681  | 43330167  | + |
| 5089 | 1435395_s_at | Region | Atp5j2        | 57423  | 5  | 144222142 | 144230028 | - |
| 5090 | 1455518_at   | Region | None          | None   | 4  | 132566198 | 132566885 | - |
| 5091 | 1459980_x_at | Region | Rab3a         | 19339  | 8  | 69909984  | 69913935  | + |
| 5092 | 1415708_at   | Region | AI316828      | 544752 | 11 | 3534987   | 3539316   | - |
| 5093 | 1425257_at   | Region | BC016076      | 217698 | 12 | 80933641  | 80940335  | + |
| 5094 | 1449290_at   | Region | Dpysl5        | 65254  | 5  | 29170843  | 29258315  | + |
| 5095 | 1451086_s_at | Region | Rac1          | 19353  | 5  | 142563708 | 142586223 | - |
| 5096 | 1455113_at   | Region | Armc8         | 74125  | 9  | 99381642  | 99469875  | - |
| 5097 | 1442676_at   | Region | Maoa          | 17161  | X  | 14858768  | 14924684  | + |
| 5098 | 1455303_at   | Region | None          | None   | 3  | 54437335  | 54438377  | - |
| 5099 | 1444270_at   | Region | Rshl3         | 212892 | 10 | 33960259  | 33970986  | + |
| 5100 | 1429356_s_at | Region | Ggps1         | 14593  | 13 | 13494995  | 13505951  | - |
| 5101 | 1431196_at   | Region | Atp2c1        | 235574 | 9  | 105393471 | 105477208 | - |
| 5102 | 1424969_s_at | Region | None          | None   | 2  | 58680481  | 58716779  | + |
| 5103 | 1422885_at   | Region | Snrpd3        | 67332  | 10 | 75619782  | 75637180  | + |
| 5104 | 1454820_at   | Region | BC037034      | 231807 | 5  | 137231897 | 137235424 | - |
| 5105 | 1458389_at   | Region | Klf7          | 93691  | 1  | 64328681  | 64414407  | - |
| 5106 | 1436056_at   | Region | Kif13b        | 16554  | 14 | 59180809  | 59337895  | + |
| 5107 | 1418788_at   | Region | Tek           | 21687  | 4  | 93714372  | 93850011  | + |
| 5108 | 1417507_at   | Region | Cyb561        | 13056  | 11 | 105754793 | 105765236 | - |
| 5109 | 1418719_at   | Region | 2410004L22Rik | 76478  | 8  | 70400736  | 70421775  | - |
| 5110 | 1434751_at   | Region | Ids           | 15931  | X  | 65014764  | 65033475  | - |
| 5111 | 1425662_at   | Region | Cdadc1        | 71891  | 14 | 54094451  | 54133002  | - |
| 5112 | 1453318_at   | Region | 4632403M07Rik | 380705 | 11 | 69528692  | 69531280  | - |
| 5113 | 1420776_a_at | Region | Auh           | 11992  | 13 | 51398632  | 51493178  | - |
| 5114 | 1419833_s_at | Region | Centd3        | 106952 | 18 | 38196350  | 38220837  | - |
| 5115 | 1455350_at   | Region | B830009D23Rik | 96957  | 2  | 120490911 | 120521692 | + |
| 5116 | 1450655_at   | Region | Herc1         | 235439 | 9  | 66474369  | 66632783  | + |
| 5117 | 1433781_a_at | Region | Cldn12        | 64945  | 5  | 5511114   | 5520878   | - |
| 5118 | 1424052_at   | Region | Thap4         | 67026  | 1  | 93532881  | 93578284  | - |
| 5119 | 1450431_a_at | Region | Nedd4         | 17999  | 9  | 72794997  | 72882331  | + |

|      |              |        |               |        |      |           |           |      |
|------|--------------|--------|---------------|--------|------|-----------|-----------|------|
| 5120 | 1451872_a_at | Region | Neurl         | 18011  | 19   | 46730295  | 46810735  | +    |
| 5121 | 1422034_a_at | Region | Palm          | 18483  | 10   | 79929264  | 79943520  | +    |
| 5122 | 1450943_at   | Region | 2010012C16Rik | 66441  | 6    | 132063125 | 132071980 | -    |
| 5123 | 1443544_at   | Region | D18Ertd653e   | 52662  | 18   | 68295003  | 68486335  | +    |
| 5124 | 1457445_at   | Region | Trps1         | 83925  | 15   | 50659276  | 50888038  | -    |
| 5125 | 1440103_at   | Region | None          | None   | 8    | 68329781  | 68330268  | -    |
| 5126 | 1457191_at   | Region | None          | None   | 3    | 55726059  | 55726719  | -    |
| 5127 | 1437464_at   | Region | Spata7        | 104871 | 12   | 94055026  | 94096657  | +    |
| 5128 | 1417477_at   | Region | Gtf3b         | 24083  | 11   | 60627888  | 60639432  | -    |
| 5129 | 1455896_a_at | Region | Kcnk1         | 16525  | 8    | 125282699 | 125318214 | +    |
| 5130 | 1448523_at   | Region | Nphp1         | 53885  | 2    | 127254585 | 127302707 | -    |
| 5131 | 1425462_at   | Region | Fbxw11        | 103583 | 11   | 32537669  | 32641610  | +    |
| 5132 | 1457189_at   | Region | Itpr1         | 16438  | 6    | 108714663 | 109053117 | +    |
| 5133 | 1441590_at   | Region | None          | None   | 9    | 32238162  | 32238812  | -    |
| 5134 | 1425605_a_at | Region | Lmbr1         | 56873  | 5    | 27683542  | 27828674  | -    |
| 5135 | 1426379_at   | Region | Eif4b         | 75705  | 15   | 102141346 | 102156533 | +    |
| 5136 | 1451236_at   | Region | Rerg          | 232441 | 6    | 137826729 | 137942405 | -    |
| 5137 | 1455094_s_at | Region | Ube2g1        | 67128  | 11   | 72333039  | 72409965  | +    |
| 5138 | 1435138_at   | Region | Tmem28        | 270028 | 8    | 8571891   | 9138527   | -    |
| 5139 | 1435567_at   | Region | Phka1         | 18679  | X    | 97117039  | 97245563  | -    |
| 5140 | 1437210_a_at | Region | Brd2          | 14312  | 17   | 31817639  | 31824919  | -    |
| 5141 | 1422527_at   | Region | H2-DMa        | 14998  | 17   | 31841425  | 31844898  | +    |
| 5142 | 1457283_at   | Region | None          | None   | 18   | 36241977  | 36420340  | -    |
| 5143 | 1435576_at   | Region | AW413774      | 106046 | 15   | 5004951   | 5005878   | +    |
| 5144 | 1434771_at   | Region | 0610011F06Rik | 68347  | 17   | 23682250  | 23683893  | +    |
| 5145 | 1439840_at   | Region | A430088C08Rik | 320892 | 8    | 21399438  | 21400852  | -    |
| 5146 | 1432494_a_at | Region | 1700019E19Rik | 76411  | 12   | 82951854  | 83032603  | +    |
| 5147 | 1416916_at   | Region | Elf3          | 13710  | 1    | 135104072 | 135108931 | -    |
| 5148 | 1419230_at   | Region | Krt1-12       | 268482 | 11   | 99236753  | 99243343  | -    |
| 5149 | 1429421_at   | Region | 2610203E10Rik | 329470 | 2    | 93540136  | 93554459  | -    |
| 5150 | 1450008_a_at | Region | Ctnnb1        | 12387  | 9    | 120945869 | 120972901 | +    |
| 5151 | 1441615_at   | Region | Cbfa2t2h      | 12396  | 2    | 153893455 | 153996293 | +    |
| 5152 | 1435528_at   | Region | D2Bwg1335e    | 52838  | 2    | 26280280  | 26284262  | -    |
| 5153 | 1424388_at   | Region | Cluap1        | 76779  | 16   | 3580573   | 3612711   | +    |
| 5154 | 1428513_at   | Region | Calcoco1      | 67488  | 15   | 102767198 | 102782488 | -    |
| 5155 | 1437216_at   | Region | A430106J12Rik | 108686 | 11   | 29375382  | 29404231  | +    |
| 5156 | 1415852_at   | Region | Impdh2        | 23918  | 9    | 108609499 | 108614571 | +    |
| 5157 | 1421938_at   | Region | Serhl         | 68607  | 15   | 83150886  | 83173420  | +    |
| 5158 | 1441218_at   | Region | None          | None   | 9    | 119978782 | 119979393 | +    |
| 5159 | 1423647_a_at | Region | Zdhhc3        | 69035  | 9    | 123091926 | 123130868 | -    |
| 5160 | 1427646_a_at | Region | Arhgef2       | 16800  | 3    | 88365002  | 88390778  | +    |
| 5161 | 1459026_at   | Region | Skiip         | 66354  | 12   | 84536947  | 84547086  | +    |
| 5162 | 1450732_a_at | Region | Bicd2         | 76895  | 13   | 48941109  | 48984662  | +    |
| 5163 | 1427144_at   | Region | Hnrpll        | 72692  | 17   | 77846881  | 77879599  | -    |
| 5164 | 1439998_at   | Region | Jmjd1c        | 108829 | 10   | 67223447  | 67293285  | +    |
| 5165 | 1448670_at   | Region | Ube2e3        | 22193  | 2    | 78566796  | 78618332  | +    |
| 5166 | 1442014_at   | Region | lfrd1         | 15982  | 12   | 36801602  | 36821637  | -    |
| 5167 | 1425071_s_at | Region | Ntrk3         | 18213  | 7    | 71981888  | 72367304  | -    |
| 5168 | 1418285_at   | Region | Efnb1         | 13641  | X    | 93737491  | 93750352  | +    |
| 5169 | 1426491_at   | Region | Herc2         | 15204  | 7    | 50319730  | 50501273  | +    |
| 5170 | 1451576_at   | Region | Prkdc         | 19090  | 16   | 14406957  | 14610487  | +    |
| 5171 | 1451380_at   | Region | Zfyve19       | 72008  | 2    | 118722806 | 118730898 | +    |
| 5172 | 1419012_at   | Region | Zfpm2         | 22762  | 15   | 40545548  | 40999330  | +    |
| 5173 | 1433779_at   | Region | Casc4         | 319996 | 2    | 121380983 | 121449712 | +    |
| 5174 | 1435819_at   | Region | None          | None   | NONE | NONE      | NONE      | NONE |
| 5175 | 1431009_at   | Region | B230219D22Rik | 78521  | 13   | 54309682  | 54320058  | +    |
| 5176 | 1420478_at   | Region | Nap1l1        | 53605  | 10   | 111105541 | 111122931 | +    |
| 5177 | 1421150_at   | Region | Hivep3        | 16656  | 4    | 119003584 | 119157855 | +    |
| 5178 | 1436118_at   | Region | Ltap          | 93840  | 1    | 171933290 | 171956187 | -    |
| 5179 | 1454991_at   | Region | Slc7a1        | 11987  | 5    | 147223681 | 147291421 | -    |
| 5180 | 1418704_at   | Region | S100a13       | 20196  | 3    | 90325216  | 90334995  | +    |
| 5181 | 1456051_at   | Region | Drd1a         | 13488  | 13   | 52615891  | 52619894  | -    |
| 5182 | 1419266_at   | Region | Nfyb          | 18045  | 10   | 82637842  | 82652084  | -    |
| 5183 | 1418042_a_at | Region | Abcc5         | 27416  | 16   | 19102921  | 19197967  | -    |
| 5184 | 1452736_at   | Region | 1700020M16Rik | 71843  | 14   | 64013147  | 64031500  | -    |

|      |              |        |               |        |    |           |           |   |
|------|--------------|--------|---------------|--------|----|-----------|-----------|---|
| 5185 | 1443630_at   | Region | Ppp3ca        | 19055  | 3  | 135555655 | 135820664 | + |
| 5186 | 1428171_at   | Region | Prpf39        | 328110 | 12 | 61831742  | 61841076  | + |
| 5187 | 1424343_a_at | Region | Eif1a         | 13664  | 18 | 46819460  | 46831964  | + |
| 5188 | 1440011_at   | Region | Ext1          | 14042  | 15 | 53068219  | 53345629  | - |
| 5189 | 1435828_at   | Region | None          | None   | 8  | 114996442 | 114997174 | - |
| 5190 | 1433920_at   | Region | Sema4c        | 20353  | 1  | 36843233  | 36852240  | - |
| 5191 | 1424473_at   | Region | Polr2h        | 245841 | 16 | 19490003  | 19494442  | + |
| 5192 | 1436471_at   | Region | Rab36         | 76877  | 10 | 75138289  | 75155300  | + |
| 5193 | 1418599_at   | Region | Col11a1       | 12814  | 3  | 26642     | 73590     | - |
| 5194 | 1451069_at   | Region | Pim3          | 223775 | 15 | 88914123  | 88917655  | + |
| 5195 | 1440854_at   | Region | 2810403A07Rik | 74200  | 3  | 88429682  | 88456786  | + |
| 5196 | 1454776_at   | Region | Ehmt1         | 77683  | 2  | 24722957  | 24819233  | - |
| 5197 | 1416516_at   | Region | Fscn1         | 14086  | 5  | 142024679 | 142037166 | + |
| 5198 | 1436172_at   | Region | 9530028C05    | 330256 | 6  | 3285716   | 3298593   | - |
| 5199 | 1444956_at   | Region | None          | None   | 5  | 22626399  | 22627260  | + |
| 5200 | 1424645_at   | Region | Tnrc6c        | 217351 | 11 | 117475908 | 117583657 | + |
| 5201 | 1432978_at   | Region | 9030607L02Rik | 75754  | 19 | 20839216  | 20840808  | - |
| 5202 | 1426207_at   | Region | Ikbkb         | 16150  | 8  | 21414342  | 21461142  | - |
| 5203 | 1440462_at   | Region | B930068K11Rik | 320622 | 2  | 34271421  | 34271904  | - |
| 5204 | 1442819_at   | Region | LOC545239     | 545239 | 18 | 4015000   | 4015904   | + |
| 5205 | 1440255_at   | Region | AA589481      | 102423 | 9  | 44284528  | 44294482  | - |
| 5206 | 1446345_at   | Region | Tbl1x         | 21372  | X  | 72294199  | 72320920  | + |
| 5207 | 1451292_at   | Region | Zfp212        | 232784 | 6  | 48044784  | 48056724  | + |
| 5208 | 1449660_s_at | Region | Coro1c        | 23790  | 5  | 112953083 | 113019350 | - |
| 5209 | 1428131_a_at | Region | Cdc42se1      | 57912  | 3  | 94716611  | 94724240  | + |
| 5210 | 1421295_at   | Region | Chrdl1        | 83453  | X  | 136738025 | 136834230 | - |
|      |              |        | Ppm1b ///     |        |    |           |           |   |
| 5211 | 1425330_a_at | Region | LOC433336     | 19043  | 17 | 82787863  | 82846969  | + |
| 5212 | 1455714_at   | Region | Gm691         | 277432 | 2  | 157371734 | 157401688 | + |
| 5213 | 1424340_at   | Region | Lrrc48        | 74665  | 11 | 60079022  | 60119975  | + |
| 5214 | 1438000_x_at | Region | Zfp622        | 52521  | 15 | 25973256  | 25987372  | + |
| 5215 | 1455800_x_at | Region | 1110030L07Rik | 68653  | 15 | 84240839  | 84264676  | + |
| 5216 | 1450011_at   | Region | Hsd17b12      | 56348  | 2  | 93737380  | 93862592  | - |
| 5217 | 1418414_at   | Region | Kcnh1         | 16510  | 1  | 191929938 | 192245812 | + |
| 5218 | 1428356_at   | Region | Osbp2         | 74309  | 11 | 3598519   | 3616991   | - |
| 5219 | 1427060_at   | Region | Mapk3         | 26417  | 7  | 120809363 | 120815547 | + |
| 5220 | 1416071_at   | Region | Ddx18         | 66942  | 1  | 121317046 | 121331136 | - |
| 5221 | 1436997_x_at | Region | Sh3bgrl       | 56726  | X  | 103696772 | 103763832 | + |
| 5222 | 1433647_s_at | Region | Rhobtb3       | 73296  | 13 | 71926694  | 72000935  | - |
| 5223 | 1427153_at   | Region | Bckdhh        | 12040  | 9  | 84278990  | 84455206  | + |
| 5224 | 1460030_at   | Region | Hecw1         | 94253  | 13 | 13672338  | 13968180  | - |
| 5225 | 1454693_at   | Region | LOC545348     | 545348 | 1  | 91756276  | 91757801  | - |
| 5226 | 1415680_at   | Region | Anapc1        | 17222  | 2  | 128126557 | 128201233 | - |
| 5227 | 1415829_at   | Region | Lbr           | 98386  | 1  | 181773496 | 181800784 | - |
| 5228 | 1433474_at   | Region | Edil3         | 13612  | 13 | 84938267  | 85437638  | + |
| 5229 | 1441587_at   | Region | A930027K05Rik | 269615 | 4  | 153475739 | 153503344 | - |
|      |              |        | Ppp1r10 ///   |        |    |           |           |   |
| 5230 | 1426727_s_at | Region | LOC545202     | 52040  | 17 | 33636151  | 33651436  | + |
| 5231 | 1436548_at   | Region | 1810012P15Rik | 66274  | 11 | 78552254  | 78563925  | + |
| 5232 | 1418640_at   | Region | Sirt1         | 93759  | 10 | 63283769  | 63303800  | - |
| 5233 | 1429725_at   | Region | Atbf1         | 11906  | 8  | 108012331 | 108254925 | + |
| 5234 | 1460169_a_at | Region | Pctk1         | 18555  | X  | 18927433  | 18938817  | + |
| 5235 | 1416211_a_at | Region | Ptn           | 19242  | 6  | 36850201  | 36945899  | - |
| 5236 | 1428172_at   | Region | Prpf39        | 328110 | 12 | 61831742  | 61841076  | + |
| 5237 | 1427546_at   | Region | Abca8b        | 27404  | 11 | 109755361 | 109816905 | - |
| 5238 | 1451912_a_at | Region | Fgfr1         | 116701 | 5  | 107770717 | 107783113 | + |
| 5239 | 1419032_at   | Region | 2610018G03Rik | 70415  | X  | 45362232  | 45412652  | + |
| 5240 | 1445351_at   | Region | None          | None   | 4  | 150234402 | 150235063 | - |
| 5241 | 1420033_s_at | Region | Ppp2r2d       | 52432  | 7  | 133232628 | 133269299 | + |
| 5242 | 1426117_a_at | Region | Slc19a2       | 116914 | 1  | 164168307 | 164184621 | + |
| 5243 | 1448763_at   | Region | Atad1         | 67979  | 19 | 31998709  | 32038444  | - |
| 5244 | 1423391_at   | Region | Git2          | 26431  | 5  | 113837037 | 113883117 | - |
| 5245 | 1428494_a_at | Region | Polr2i        | 69920  | 7  | 25645252  | 25646692  | + |
| 5246 | 1456475_s_at | Region | Prkar2b       | 19088  | 12 | 28534800  | 28637055  | - |
| 5247 | 1427917_s_at | Region | Ssbp3         | 72475  | 4  | 105870375 | 106008599 | + |

|      |              |        |               |        |      |           |           |      |
|------|--------------|--------|---------------|--------|------|-----------|-----------|------|
| 5248 | 1428903_at   | Region | 3110037116Rik | 73172  | 4    | 119943646 | 119947449 | -    |
| 5249 | 1438399_at   | Region | Pex2          | 58869  | 3    | 32358790  | 32491207  | -    |
| 5250 | 1420954_a_at | Region | Add1          | 11518  | 5    | 33061487  | 33119289  | +    |
| 5251 | 1452243_at   | Region | Kcnj14        | 211480 | 7    | 39901348  | 39909502  | -    |
| 5252 | 1428014_at   | Region | Hist1h4h      | 69386  | 13   | 23011114  | 23011583  | +    |
| 5253 | 1448641_at   | Region | Mbtd1         | 103537 | 11   | 93733496  | 93766406  | +    |
| 5254 | 1421276_a_at | Region | Dst           | 13518  | 1    | 34280938  | 34577763  | +    |
| 5255 | 1455859_at   | Region | A330021E22Rik | 207686 | 5    | 5586987   | 5670237   | -    |
| 5256 | 1430307_a_at | Region | Mod1          | 17436  | 9    | 86923622  | 87038833  | -    |
| 5257 | 1420013_s_at | Region | Lss           | 16987  | 10   | 76632617  | 76654924  | +    |
| 5258 | 1418758_a_at | Region | Pscd3         | 19159  | 5    | 142683118 | 142770834 | +    |
| 5259 | 1417631_at   | Region | Mknk1         | 17346  | 4    | 114798151 | 114838153 | +    |
| 5260 | 1425388_a_at | Region | Tpk1          | 29807  | 6    | 43507611  | 43830739  | -    |
| 5261 | 1418131_at   | Region | Samhd1        | 56045  | 2    | 156554498 | 156592191 | -    |
| 5262 | 1415785_a_at | Region | Cct8          | 12469  | 16   | 86632779  | 86645309  | -    |
| 5263 | 1445322_x_at | Region | E430025E21Rik | 223593 | 15   | 59342534  | 59384689  | -    |
| 5264 | 1460293_at   | Region | Freq          | 14299  | 2    | 31178085  | 31227634  | +    |
| 5265 | 1418861_at   | Region | Pias4         | 59004  | 10   | 81288763  | 81303101  | -    |
| 5266 | 1425693_at   | Region | Braf          | 109880 | 6    | 39749542  | 39860924  | -    |
| 5267 | 1448166_a_at | Region | Psmb1         | 19170  | 17   | 13479611  | 13501932  | -    |
| 5268 | 1453406_a_at | Region | Rab28         | 100972 | 5    | 40380642  | 40464106  | -    |
| 5269 | 1427139_at   | Region | Adamts10      | 224697 | 17   | 31241547  | 31249680  | +    |
| 5270 | 1457367_at   | Region | None          | None   | 3    | 32123901  | 32124479  | +    |
| 5271 | 1445095_at   | Region | None          | None   | 13   | 108914407 | 108915065 | -    |
| 5272 | 1443871_at   | Region | Gm1649        | 381459 | 3    | 100111350 | 100112984 | -    |
| 5273 | 1439614_at   | Region | None          | None   | 18   | 62731288  | 62731768  | +    |
| 5274 | 1423468_at   | Region | Steap3        | 68428  | 1    | 119985615 | 120002678 | -    |
| 5275 | 1423153_x_at | Region | Cfh           | 12628  | 1    | 139935794 | 140062362 | -    |
| 5276 | 1435441_at   | Region | Abli2         | 231148 | 5    | 34245478  | 34371978  | +    |
| 5277 | 1444487_at   | Region | Lrat          | 79235  | 3    | 82624549  | 82633119  | -    |
| 5278 | 1453256_at   | Region | Polr3c        | 74414  | 3    | 96199326  | 96215464  | -    |
| 5279 | 1415791_at   | Region | Rnf34         | 80751  | 5    | 122003097 | 122021854 | +    |
| 5280 | 1446849_at   | Region | None          | None   | NONE | NONE      | NONE      | NONE |
| 5281 | 1439975_at   | Region | BC062109      | 231503 | 5    | 99096511  | 99178447  | -    |
| 5282 | 1418670_s_at | Region | None          | None   | 4    | 136350082 | 136451892 | +    |
| 5283 | 1423208_at   | Region | 0610041E09Rik | 66074  | 13   | 86207541  | 86225129  | +    |
| 5284 | 1442155_at   | Region | 4632427E13Rik | 68186  | 7    | 86774252  | 86775226  | -    |
| 5285 | 1446541_at   | Region | 4930434E21Rik | 381693 | 5    | 148466926 | 148550142 | +    |
| 5286 | 1456146_at   | Region | 2210411A11Rik | 72358  | 9    | 115215989 | 115216963 | +    |
| 5287 | 1441577_at   | Region | C530014P21Rik | 399604 | 17   | 60553133  | 60553742  | -    |
| 5288 | 1433040_at   | Region | 2900018E21Rik | 72943  | 10   | 90568957  | 90570486  | +    |
| 5289 | 1425391_a_at | Region | Osbp15        | 79196  | 7    | 138101781 | 138155802 | -    |
| 5290 | 1429961_at   | Region | 1700021C14Rik | 76927  | 3    | 88026624  | 88040863  | -    |
| 5291 | 1433969_at   | Region | AU067824      | 106734 | 17   | 78354275  | 78354760  | -    |
| 5292 | 1431371_at   | Region | 9030411M13Rik | 71535  | 10   | 124915295 | 124917383 | -    |
| 5293 | 1417177_at   | Region | Galk1         | 14635  | 11   | 115829619 | 115833771 | -    |
| 5294 | 1450914_at   | Region | Ppp1r14b      | 18938  | 19   | 6688834   | 6691170   | +    |
| 5295 | 1454736_at   | Region | 4921515A04Rik | 268301 | 10   | 59180836  | 59183260  | +    |
| 5296 | 1436067_at   | Region | Zbtb10        | 229055 | 3    | 9111529   | 9270577   | +    |
| 5297 | 1452753_at   | Region | Foxk2         | 68837  | 11   | 121080635 | 121128991 | +    |
| 5298 | 1430452_at   | Region | Cyp20a1       | 77951  | 1    | 60646611  | 60675997  | +    |
| 5299 | 1448919_at   | Region | Cd302         | 66205  | 2    | 60107393  | 60139818  | -    |
| 5300 | 1423416_at   | Region | Smarcc1       | 20588  | 9    | 110159869 | 110278595 | +    |
| 5301 | 1456779_a_at | Region | 4930414L22Rik | 78108  | 6    | 72772008  | 72772590  | +    |
| 5302 | 1426472_at   | Region | Zfp52         | 22710  | 17   | 19404937  | 19434146  | +    |
| 5303 | 1431199_at   | Region | 0610031G08Rik | 75393  | 17   | 24813037  | 24817405  | +    |
| 5304 | 1444557_at   | Region | None          | None   | 1    | 59945208  | 59945661  | -    |
| 5305 | 1446720_at   | Region | Alcam         | 11658  | 16   | 51168811  | 51372049  | -    |
| 5306 | 1427893_a_at | Region | Pmvk          | 68603  | 3    | 89216043  | 89225732  | +    |
| 5307 | 1453310_at   | Region | Ppil6         | 73075  | 10   | 41592302  | 41616124  | +    |
| 5308 | 1442787_at   | Region | None          | None   | 1    | 60784904  | 60785232  | +    |
| 5309 | 1452093_at   | Region | 2500001K11Rik | 226351 | 1    | 119277601 | 119279660 | +    |
| 5310 | 1418134_at   | Region | 1200007B05Rik | 67453  | 18   | 31819928  | 31849663  | -    |
| 5311 | 1448427_at   | Region | Ndufa6        | 67130  | 15   | 82400880  | 82404959  | -    |
| 5312 | 1421448_at   | Region | Garnl1        | 56784  | 12   | 52323288  | 52540884  | -    |

|      |              |        |               |        |    |           |           |   |
|------|--------------|--------|---------------|--------|----|-----------|-----------|---|
| 5313 | 1419912_s_at | Region | Strap         | 20901  | 6  | 138527082 | 138543054 | + |
| 5314 | 1434370_s_at | Region | Faf1          | 14084  | 4  | 108635532 | 108922865 | + |
| 5315 | 1457024_x_at | Region | Slc35a2       | 22232  | X  | 6123184   | 6133345   | + |
| 5316 | 1437289_at   | Region | 1110001C20Rik | 242291 | 4  | 4691488   | 4720452   | - |
| 5317 | 1437354_at   | Region | None          | None   | 7  | 53585497  | 53587990  | + |
| 5318 | 1452289_a_at | Region | Rnf135        | 71956  | 11 | 79909531  | 79925412  | + |
| 5319 | 1436629_at   | Region | A830041P22Rik | 320208 | 7  | 20833839  | 20839866  | - |
| 5320 | 1417358_s_at | Region | Sorbs1        | 20411  | 19 | 39839082  | 40058071  | - |
| 5321 | 1451309_at   | Region | Arhgap1       | 228359 | 2  | 91357957  | 91377067  | + |
| 5322 | 1445846_at   | Region | None          | None   | 7  | 50987935  | 50988845  | - |
| 5323 | 1456824_at   | Region | None          | None   | 8  | 109389844 | 109390417 | + |
| 5324 | 1444295_at   | Region | Neo1          | 18007  | 9  | 58995038  | 59154898  | - |
| 5325 | 1439702_at   | Region | Myt1l         | 17933  | 12 | 26094752  | 26491102  | + |
| 5326 | 1426065_a_at | Region | Trib3         | 228775 | 2  | 151794358 | 151800968 | - |
| 5327 | 1451572_a_at | Region | 5230400G24Rik | 75734  | 1  | 83054024  | 83081496  | + |
| 5328 | 1433703_s_at | Region | Bahd1         | 228536 | 2  | 118415306 | 118438363 | + |
| 5329 | 1420412_at   | Region | Tnfsf10       | 22035  | 3  | 26734898  | 26753894  | + |
| 5330 | 1423586_at   | Region | Axl           | 26362  | 7  | 20922056  | 20953324  | - |
| 5331 | 1429284_at   | Region | 8430436F23Rik | 71559  | 4  | 35088141  | 35089705  | - |
| 5332 | 1455126_x_at | Region | 2310028O11Rik | 433771 | 4  | 137985045 | 137985274 | + |
| 5333 | 1449055_x_at | Region | Pcbp4         | 59092  | 9  | 106517872 | 106528323 | + |
| 5334 | 1446508_at   | Region | None          | None   | 15 | 68367427  | 68367967  | - |
| 5335 | 1415737_at   | Region | Rfk           | 54391  | 19 | 16618183  | 16625435  | + |
| 5336 | 1436089_at   | Region | Ddx26         | 18130  | 14 | 57209161  | 57294009  | - |
| 5337 | 1434777_at   | Region | Lmyc1         | 16918  | 4  | 122023211 | 122029597 | + |
| 5338 | 1455772_at   | Region | Pgr           | 18667  | 9  | 8911412   | 8976391   | + |
| 5339 | 1435200_at   | Region | 6330419J24Rik | 320237 | X  | 51129329  | 51132510  | + |
| 5340 | 1423922_s_at | Region | C77668        | 229543 | 3  | 90201806  | 90244054  | - |
| 5341 | 1429590_at   | Region | Tacc1         | 320165 | 8  | 23877518  | 23925420  | - |
| 5342 | 1418258_s_at | Region | 6720463E02Rik | 68097  | 11 | 87707525  | 87715497  | - |
| 5343 | 1428156_at   | Region | Gng2          | 14702  | 14 | 18235904  | 18323407  | - |
| 5344 | 1424810_at   | Region | 4930485D02Rik | 75812  | 2  | 139347439 | 139580613 | - |
|      |              |        | Hmgb1 ///     |        |    |           |           |   |
|      |              |        | LOC213079 /// |        |    |           |           |   |
|      |              |        | LOC433238 /// |        |    |           |           |   |
|      |              |        | LOC433305 /// |        |    |           |           |   |
| 5345 | 1435324_x_at | Region | LOC434174     | 15289  | 5  | 147944154 | 147949960 | - |
| 5346 | 1420429_at   | Region | Pcdhb3        | 93874  | 18 | 37524705  | 37527701  | + |
| 5347 | 1446386_at   | Region | Tcf4          | 21413  | 18 | 69575005  | 69915006  | + |
| 5348 | 1420704_at   | Region | Csf2ra        | 12982  | 11 | 15        | 635       | + |
| 5349 | 1448244_at   | Region | Lypla1        | 18777  | 1  | 4768285   | 4807127   | + |
| 5350 | 1429321_at   | Region | Rnf149        | 67702  | 1  | 39848213  | 39874285  | - |
| 5351 | 1452041_at   | Region | C630013N10Rik | 234378 | 8  | 69605293  | 69631982  | - |
|      |              |        | Hmgb2 ///     |        |    |           |           |   |
|      |              |        | LOC433785 /// |        |    |           |           |   |
|      |              |        | LOC433788 /// |        |    |           |           |   |
|      |              |        | LOC433799 /// |        |    |           |           |   |
| 5352 | 1437313_x_at | Region | LOC545710     | 433785 | 4  | 144644465 | 144645615 | - |
| 5353 | 1453266_at   | Region | Zbtb4         | 75580  | 11 | 69492223  | 69505059  | + |
| 5354 | 1417741_at   | Region | Pygl          | 110095 | 12 | 67022972  | 67059778  | - |
| 5355 | 1454615_x_at | Region | Srp14         | 20813  | 2  | 117989699 | 117993510 | - |
| 5356 | 1434538_x_at | Region | Eif2b2        | 217715 | 12 | 82088696  | 82095811  | + |
| 5357 | 1451555_at   | Region | Nln           | 75805  | 13 | 100241399 | 100327761 | - |
| 5358 | 1419821_s_at | Region | ldh1          | 15926  | 1  | 65452617  | 65473274  | - |
| 5359 | 1440496_at   | Region | None          | None   | 15 | 84265156  | 84265770  | + |
| 5360 | 1444615_x_at | Region | Cbfa2t1h      | 12395  | 4  | 13711747  | 13818082  | + |
| 5361 | 1435062_at   | Region | 1500001A10Rik | 68955  | 5  | 115563065 | 115714339 | - |
| 5362 | 1451808_at   | Region | Kcnj4         | 16520  | 15 | 79536173  | 79557665  | - |
| 5363 | 1420990_at   | Region | Chd1          | 12648  | 17 | 13708827  | 13773901  | + |
| 5364 | 1426184_a_at | Region | Pdcd6ip       | 18571  | 9  | 113708127 | 113760882 | - |
| 5365 | 1416601_a_at | Region | Dscr1         | 54720  | 16 | 91551471  | 91559574  | - |
| 5366 | 1417852_x_at | Region | Clca1         | 12722  | 3  | 143701991 | 143732414 | - |
| 5367 | 1459666_at   | Region | AI413908      | 102495 | 9  | 121478609 | 121479049 | + |
| 5368 | 1424182_at   | Region | Acat1         | 110446 | 9  | 53644099  | 53673628  | - |
| 5369 | 1436351_at   | Region | Coq3          | 230027 | 4  | 21949046  | 21981497  | + |

|      |              |        |               |        |      |           |           |      |
|------|--------------|--------|---------------|--------|------|-----------|-----------|------|
| 5370 | 1434560_at   | Region | Wdtd1         | 230796 | 4    | 132253365 | 132300004 | -    |
| 5371 | 1460000_at   | Region | D830007B15Rik | 330096 | 5    | 66374549  | 66380118  | +    |
| 5372 | 1456695_x_at | Region | Anapc5        | 59008  | 5    | 121940636 | 121974194 | -    |
| 5373 | 1439482_at   | Region | F830021D11Rik | 224648 | 17   | 25651716  | 25693135  | +    |
|      |              |        | Rps6 ///      |        |      |           |           |      |
|      |              |        | LOC214738 /// |        |      |           |           |      |
|      |              |        | LOC216036 /// |        |      |           |           |      |
|      |              |        | LOC236932 /// |        |      |           |           |      |
|      |              |        | LOC434404 /// |        |      |           |           |      |
| 5374 | 1455981_at   | Region | LOC545640     | 20104  | 4    | 85840854  | 85843549  | -    |
| 5375 | 1449025_at   | Region | lfit3         | 15959  | 19   | 33932821  | 33937973  | +    |
| 5376 | 1456096_at   | Region | 6430573F11Rik | 319582 | 8    | 35293919  | 35317741  | +    |
| 5377 | 1440230_at   | Region | 9530051K01Rik | 244152 | 7    | 92397408  | 92398404  | -    |
| 5378 | 1421374_a_at | Region | Fxyd1         | 56188  | 7    | 26460006  | 26463982  | -    |
| 5379 | 1431074_a_at | Region | Pitpnc1       | 71795  | 11   | 107033195 | 107291788 | -    |
| 5380 | 1418584_at   | Region | Ccnh          | 66671  | 13   | 81281211  | 81305457  | +    |
| 5381 | 1440883_at   | Region | None          | None   | 2    | 6362314   | 6363663   | +    |
| 5382 | 1416205_at   | Region | Glb1          | 12091  | 9    | 114364315 | 114438701 | +    |
| 5383 | 1453722_s_at | Region | Sfrs1         | 110809 | 11   | 87775771  | 87779641  | +    |
| 5384 | 1441453_at   | Region | B930096L08Rik | 209773 | 6    | 39597808  | 39693264  | -    |
| 5385 | 1428672_at   | Region | Snrpf         | 69878  | 4    | 148807469 | 148807918 | -    |
| 5386 | 1453852_at   | Region | 8430408E17Rik | 71464  | 10   | 62589317  | 62590270  | -    |
| 5387 | 1428165_at   | Region | Vps24         | 66700  | 6    | 71875831  | 71913551  | +    |
| 5388 | 1422572_at   | Region | Rhog          | 56212  | 7    | 96345084  | 96356054  | -    |
| 5389 | 1442174_at   | Region | Tspan18       | 241556 | 2    | 92906443  | 93039133  | -    |
| 5390 | 1454404_at   | Region | 2610011E03Rik | 72460  | 5    | 131185791 | 131187998 | -    |
| 5391 | 1449075_at   | Region | 4930539P14Rik | 97827  | 12   | 77337250  | 77359377  | +    |
| 5392 | 1457464_at   | Region | C130015C19    | 403342 | 13   | 53896405  | 53897224  | +    |
| 5393 | 1452897_at   | Region | Cdc2l5        | 69562  | 13   | 17181756  | 17269467  | -    |
| 5394 | 1456581_x_at | Region | Gdi3          | 14569  | 13   | 3422528   | 3450201   | +    |
| 5395 | 1443660_at   | Region | None          | None   | NONE | NONE      | NONE      | NONE |
| 5396 | 1420136_a_at | Region | None          | None   | 1    | 23534126  | 23534479  | +    |
| 5397 | 1426124_a_at | Region | Clk1          | 12747  | 1    | 58716755  | 58728765  | -    |
| 5398 | 1415735_at   | Region | Ddb1          | 13194  | 19   | 9802122   | 9826319   | +    |
| 5399 | 1438389_x_at | Region | Acly          | 104112 | 11   | 100297443 | 100348988 | -    |
| 5400 | 1449085_at   | Region | Phf10         | 72057  | 17   | 12997725  | 13044853  | -    |
| 5401 | 1428438_s_at | Region | 2700023B17Rik | 67070  | 7    | 29498435  | 29543405  | -    |
| 5402 | 1442269_at   | Region | None          | None   | 18   | 68004512  | 68005173  | -    |
| 5403 | 1431116_at   | Region | C030003D03Rik | 77220  | 10   | 25982477  | 26078288  | -    |
| 5404 | 1458147_at   | Region | Mamdc1        | 320772 | 12   | 63250963  | 63650479  | -    |
| 5405 | 1417770_s_at | Region | None          | None   | 14   | 11426901  | 11490818  | -    |
| 5406 | 1444827_at   | Region | Btbd9         | 224671 | 17   | 28030141  | 28340405  | -    |
| 5407 | 1451675_a_at | Region | Alas2         | 11656  | X    | 144081840 | 144105014 | +    |
| 5408 | 1436360_at   | Region | Hkr2          | 232878 | 7    | 10891496  | 10901920  | +    |
| 5409 | 1420476_a_at | Region | Nap1l1        | 53605  | 10   | 111105541 | 111122931 | +    |
| 5410 | 1445546_at   | Region | Al844685      | 106267 | 3    | 156619633 | 156620192 | +    |
| 5411 | 1448261_at   | Region | Cdh1          | 12550  | 8    | 105899005 | 105965883 | +    |
| 5412 | 1420707_a_at | Region | Traip         | 22036  | 9    | 108018950 | 108040255 | +    |
| 5413 | 1440864_at   | Region | Al836737      | 103288 | 10   | 32939882  | 32940562  | +    |
| 5414 | 1423663_at   | Region | Flcn          | 216805 | 11   | 59517379  | 59535402  | -    |
| 5415 | 1415921_a_at | Region | Tnfrsf19      | 29820  | 14   | 55499179  | 55581612  | -    |
| 5416 | 1416850_s_at | Region | D10Erttd214e  | 52637  | 10   | 71384461  | 71398816  | -    |
| 5417 | 1443184_at   | Region | Cdc14a        | 229776 | 3    | 115042345 | 115193064 | -    |
| 5418 | 1445984_at   | Region | Pftk1         | 18647  | 5    | 4809738   | 5386208   | -    |
| 5419 | 1455686_at   | Region | None          | None   | 5    | 44455827  | 44456994  | -    |
| 5420 | 1450056_at   | Region | Apc           | 11789  | 18   | 34484045  | 34541630  | +    |
| 5421 | 1433620_at   | Region | None          | None   | 13   | 91181251  | 91207437  | +    |
| 5422 | 1428969_at   | Region | D030074E01Rik | 75964  | 18   | 21032145  | 21044024  | -    |
| 5423 | 1440850_at   | Region | Rnf12         | 19820  | X    | 98558532  | 98582649  | -    |
| 5424 | 1431861_a_at | Region | D3Erttd250e   | 52184  | 3    | 144090760 | 144127134 | +    |
| 5425 | 1421830_at   | Region | Ak3l1         | 11639  | 4    | 100377949 | 100425900 | +    |
| 5426 | 1456580_s_at | Region | Atp5d         | 66043  | 10   | 80265814  | 80269260  | +    |
| 5427 | 1443917_at   | Region | 0610007H07Rik | 68212  | 10   | 119786523 | 119802594 | +    |
| 5428 | 1431429_a_at | Region | Arl4          | 11861  | 12   | 36632028  | 36636075  | -    |
| 5429 | 1418458_at   | Region | Anapc7        | 56317  | 5    | 121574831 | 121596929 | +    |

|      |              |        |               |                   |    |           |           |   |
|------|--------------|--------|---------------|-------------------|----|-----------|-----------|---|
| 5430 | 1455961_at   | Region | Mme           | 17380             | 3  | 62963798  | 63050157  | + |
| 5431 | 1455668_at   | Region | 6720429000    | 330725            | 8  | 24443658  | 24444733  | + |
| 5432 | 1424851_at   | Region | Chchd5        | 66170             | 2  | 128643675 | 128647960 | + |
| 5433 | 1439108_at   | Region | Mll5          | 69188             | 5  | 21950220  | 21960092  | + |
| 5434 | 1417730_at   | Region | Ext1          | 14042             | 15 | 53068219  | 53345629  | - |
| 5435 | 1433513_x_at | Region | Ndufa12       | 66414             | 10 | 94172393  | 94194766  | + |
| 5436 | 1453028_at   | Region | 4631424J17Rik | 70802             | 11 | 43434843  | 43460028  | + |
| 5437 | 1418533_s_at | Region | Fzd2          | 57265             | 11 | 102425622 | 102427671 | + |
| 5438 | 1450074_at   | Region | Kif3b         | 16569             | 2  | 152748365 | 152789150 | + |
| 5439 | 1435787_at   | Region | Ppm1l         | 242083            | 3  | 68987383  | 69225607  | + |
| 5440 | 1426266_s_at | Region | Zbtb8os       | 67106             | 4  | 128363139 | 128374142 | + |
| 5441 | 1460708_s_at | Region | Cdc42         | 12540             | 4  | 136200964 | 136217395 | - |
| 5442 | 1423229_at   | Region | Inpp5e        | 64436             | 2  | 26328411  | 26341350  | - |
| 5443 | 1429117_at   | Region | Tradd         | 71609             | 8  | 104553932 | 104560238 | - |
| 5444 | 1453229_s_at | Region | Uqcrh         | 66576             | 4  | 115025870 | 115033953 | - |
| 5445 | 1448755_at   | Region | Col15a1       | 12819             | 4  | 47124115  | 47229087  | + |
| 5446 | 1441505_at   | Region | None          | None              | 3  | 90106118  | 90106624  | + |
| 5447 | 1439120_at   | Region | BC010304      | 218236            | 13 | 48508119  | 48513447  | - |
| 5448 | 1419644_at   | Region | Cstf2         | 108062            | X  | 127604288 | 127631760 | + |
| 5449 | 1438543_at   | Region | Spata13       | 219140            | 14 | 55169182  | 55299693  | + |
| 5450 | 1421097_at   | Region | Entog         | 13804             | 2  | 30103686  | 30106231  | + |
| 5451 | 1438628_x_at | Region | Cntn3         | 18488             | 6  | 102641686 | 102940436 | - |
| 5452 | 1460630_at   | Region | Camk2d        | 108058            | 3  | 125480582 | 125726370 | + |
| 5453 | 1433832_at   | Region | B230369L08Rik | 223697            | 15 | 79776391  | 79794850  | - |
| 5454 | 1449019_at   | Region | Akap1         | 11640             | 11 | 88652757  | 88672590  | - |
| 5455 | 1439890_at   | Region | Fbxl7         | 448987            | 15 | 26532728  | 26884891  | - |
| 5456 | 1431375_s_at | Region | Parva         | 57342             | 7  | 106281338 | 106445320 | + |
| 5457 | 1460308_a_at | Region | Ict1          | 68572             | 11 | 115224859 | 115232006 | + |
| 5458 | 1423333_at   | Region | 1200007D18Rik | 67458             | 17 | 24356346  | 24451768  | + |
| 5459 | 1418389_at   | Region | 2810453I06Rik | 67238             | 5  | 142607596 | 142623478 | + |
| 5460 | 1416037_a_at | Region | Cct2          | 12461             | 10 | 116740451 | 116753217 | - |
| 5461 | 1426361_at   | Region | Zc3h11a       | 70579             | 1  | 133482838 | 133516350 | - |
| 5462 | 1448790_at   | Region | Sema6b        | 20359             | 17 | 53760130  | 53769910  | - |
|      |              |        |               | C130038G02Rik /// |    |           |           |   |
| 5463 | 1432205_a_at | Region | mKIAA0774     | 545821            | 5  | 147156887 | 147205334 | + |
| 5464 | 1457799_at   | Region | Kcns3         | 238076            | 12 | 10443638  | 10503809  | - |
| 5465 | 1436752_at   | Region | 5730478M09Rik | 70573             | 16 | 21596550  | 21641135  | - |
| 5466 | 1420799_at   | Region | Ntsr1         | 18216             | 2  | 180216934 | 180261937 | + |
| 5467 | 1417418_s_at | Region | Cox6a1        | 12861             | 5  | 114456220 | 114459517 | - |
| 5468 | 1454972_at   | Region | Atcay         | 16467             | 10 | 81340453  | 81366832  | - |
| 5469 | 1439664_at   | Region | Wdr68         | 71833             | 11 | 105857961 | 105876453 | + |
| 5470 | 1437345_a_at | Region | Bscl2         | 14705             | 19 | 8036050   | 8045214   | + |
| 5471 | 1426821_at   | Region | Cog8          | 97484             | 8  | 106338850 | 106354346 | - |
| 5472 | 1417625_s_at | Region | Cmkor1        | 12778             | 1  | 90022553  | 90034838  | + |
| 5473 | 1441248_at   | Region | None          | None              | 8  | 59975938  | 59976351  | - |
| 5474 | 1422258_at   | Region | Chrm3         | 12671             | 13 | 9860822   | 10353284  | - |
| 5475 | 1460224_at   | Region | Snx2          | 67804             | 18 | 53394494  | 53438989  | + |
| 5476 | 1434135_at   | Region | B3galnt2      | 97884             | 13 | 13397005  | 13441487  | + |
| 5477 | 1437550_at   | Region | Dhx36         | 72162             | 3  | 62137118  | 62174023  | - |
| 5478 | 1416263_at   | Region | Abcb9         | 56325             | 5  | 123233182 | 123267116 | - |
| 5479 | 1422594_at   | Region | 5730470L24Rik | 66641             | 3  | 102423707 | 102431881 | + |
| 5480 | 1435400_at   | Region | 1500004F05Rik | 69765             | 8  | 39328856  | 39329952  | + |
| 5481 | 1418727_at   | Region | Nup155        | 170762            | 15 | 7896928   | 7946387   | + |
| 5482 | 1423840_at   | Region | D11Etd99e     | 52469             | 11 | 101099057 | 101100035 | - |
| 5483 | 1450097_s_at | Region | Gna12         | 14673             | 5  | 139758776 | 139829256 | - |
| 5484 | 1434865_a_at | Region | Exoc7         | 53413             | 11 | 116110276 | 116127766 | - |
| 5485 | 1450478_a_at | Region | Ptpn12        | 19248             | 5  | 19439215  | 19508367  | - |
| 5486 | 1423310_at   | Region | Tpbp          | 21983             | 9  | 86173432  | 86176811  | + |
| 5487 | 1421354_at   | Region | Prkg2         | 19092             | 5  | 97950831  | 98055222  | - |
| 5488 | 1416215_at   | Region | Gosr1         | 53334             | 11 | 76452260  | 76489213  | - |
| 5489 | 1452066_a_at | Region | Ndfip2        | 76273             | 14 | 99801590  | 99852059  | + |
| 5490 | 1432156_a_at | Region | Rnf32         | 56874             | 5  | 27646557  | 27676001  | + |
| 5491 | 1418403_at   | Region | Adam19        | 11492             | 11 | 45808889  | 45900180  | + |
| 5492 | 1425148_a_at | Region | Snx6          | 72183             | 12 | 0         | 675       | - |
| 5493 | 1446329_at   | Region | Gkap1         | 56278             | 13 | 56862150  | 56893001  | - |

|      |              |        |               |        |      |           |           |      |
|------|--------------|--------|---------------|--------|------|-----------|-----------|------|
| 5494 | 1448736_a_at | Region | Hprt1         | 15452  | X    | 47508933  | 47542455  | +    |
| 5495 | 1454891_at   | Region | Cds2          | 110911 | 2    | 131777151 | 131821546 | +    |
| 5496 | 1422797_at   | Region | MGI:1932697   | 83409  | 3    | 88293683  | 88296791  | -    |
| 5497 | 1416011_x_at | Region | Ehd1          | 13660  | 19   | 6065686   | 6088886   | +    |
| 5498 | 1447211_at   | Region | Nrip1         | 268903 | 16   | 75376752  | 75458939  | -    |
| 5499 | 1456383_at   | Region | Rsl1d1        | 66409  | 16   | 10439299  | 10449554  | +    |
| 5500 | 1431110_at   | Region | 5430431D22Rik | 74506  | 2    | 16679533  | 16682213  | +    |
| 5501 | 1434442_at   | Region | D5ErtD593e    | 52331  | 5    | 91938800  | 91942328  | +    |
| 5502 | 1423230_at   | Region | Inpp5e        | 64436  | 2    | 26328411  | 26341350  | -    |
| 5503 | 1421026_at   | Region | Gna12         | 14673  | 5    | 139758776 | 139829256 | -    |
| 5504 | 1440273_at   | Region | LOC545753     | 545753 | 5    | 63599806  | 63601660  | -    |
| 5505 | 1460740_at   | Region | Cltb          | 74325  | 13   | 53203300  | 53220857  | -    |
| 5506 | 1415744_at   | Region | H2-Ke2        | 14976  | 17   | 31642666  | 31644048  | -    |
| 5507 | 1434750_at   | Region | Sec6l1        | 211446 | 13   | 70234117  | 70270772  | -    |
| 5508 | 1460303_at   | Region | Nr3c1         | 14815  | 18   | 39638075  | 39711047  | -    |
| 5509 | 1426487_a_at | Region | Rbbp6         | 19647  | 7    | 116848797 | 116880431 | +    |
| 5510 | 1451744_a_at | Region | Zadh1         | 77219  | 12   | 81153770  | 81182471  | +    |
| 5511 | 1436244_a_at | Region | Tle2          | 21886  | 10   | 81711856  | 81727530  | +    |
| 5512 | 1426891_at   | Region | Rpap1         | 68925  | 2    | 119277813 | 119301347 | -    |
| 5513 | 1437111_at   | Region | C230027N18Rik | 330940 | 9    | 52181537  | 52183610  | -    |
| 5514 | 1456135_s_at | Region | Pxn           | 19303  | 5    | 114657142 | 114667534 | +    |
| 5515 | 1455752_a_at | Region | 2410001H17Rik | 66990  | 19   | 3914777   | 3921075   | +    |
| 5516 | 1422256_at   | Region | Sstr2         | 20606  | 11   | 113440569 | 113446988 | +    |
| 5517 | 1419000_at   | Region | Cpxm2         | 55987  | 7    | 126406479 | 126517151 | -    |
| 5518 | 1437479_x_at | Region | Tbx3          | 21386  | 5    | 118821012 | 118834673 | +    |
| 5519 | 1441645_s_at | Region | Ipo9          | 226432 | 1    | 135234946 | 135287679 | -    |
| 5520 | 1435122_x_at | Region | Dnmt1         | 13433  | 9    | 20784243  | 20829937  | -    |
| 5521 | 1435719_at   | Region | AI448984      | 100124 | 4    | 34718484  | 34719775  | +    |
| 5522 | 1429737_a_at | Region | 0610009I22Rik | 66586  | 2    | 132361587 | 132380004 | +    |
| 5523 | 1448893_at   | Region | Ncor2         | 20602  | 5    | 124178459 | 124286279 | -    |
| 5524 | 1429329_at   | Region | Cox10         | 70383  | 11   | 63689518  | 63805064  | -    |
| 5525 | 1438538_at   | Region | D630021H01Rik | 319914 | X    | 68741703  | 68742351  | -    |
| 5526 | 1451294_s_at | Region | Snrpe         | 20643  | 1    | 133465225 | 133471606 | -    |
| 5527 | 1460082_at   | Region | Ing3          | 71777  | 6    | 21996682  | 22023073  | +    |
| 5528 | 1434059_at   | Region | B230312A22Rik | 230088 | 4    | 42948432  | 42962125  | -    |
|      |              |        | Rps12 ///     |        |      |           |           |      |
|      |              |        | LOC432865 /// |        |      |           |           |      |
|      |              |        | LOC434839 /// |        |      |           |           |      |
|      |              |        | LOC434843 /// |        |      |           |           |      |
|      |              |        | LOC546370 /// |        |      |           |           |      |
|      |              |        | LOC546371 /// |        |      |           |           |      |
|      |              |        | LOC546372 /// |        |      |           |           |      |
| 5529 | 1447205_x_at | Region | LOC546373     | 20042  | 10   | 58921849  | 58922343  | +    |
| 5530 | 1455703_at   | Region | Akt2          | 11652  | 7    | 22980718  | 23014488  | +    |
| 5531 | 1423583_at   | Region | Fem1a         | 14154  | 17   | 53893863  | 53898116  | +    |
| 5532 | 1455534_s_at | Region | Osbp11        | 106326 | 16   | 31993123  | 32051348  | +    |
| 5533 | 1437967_at   | Region | Ttn           | 22138  | 2    | 76707652  | 76708282  | -    |
| 5534 | 1424488_a_at | Region | 1110013G13Rik | 74776  | 3    | 132200512 | 132268465 | +    |
| 5535 | 1434294_at   | Region | None          | None   | 1    | 122641244 | 122641972 | +    |
| 5536 | 1428454_at   | Region | Bcas3         | 192197 | 11   | 85081206  | 85554043  | +    |
| 5537 | 1415742_at   | Region | Aup1          | 11993  | 6    | 13227949  | 13231164  | +    |
| 5538 | 1433935_at   | Region | AU020206      | 101757 | NONE | NONE      | NONE      | NONE |
| 5539 | 1428231_at   | Region | Cpsf6         | 432508 | 10   | 117034119 | 117066391 | -    |
| 5540 | 1460221_at   | Region | Ptges3        | 56351  | 10   | 127795692 | 127813964 | +    |
| 5541 | 1424915_s_at | Region | None          | None   | 12   | 83821014  | 83839147  | +    |
| 5542 | 1416542_at   | Region | Phf1          | 21652  | 17   | 24728395  | 24732952  | +    |
| 5543 | 1438368_a_at | Region | Matr3         | 17184  | 18   | 35795510  | 35815074  | +    |
| 5544 | 1456045_at   | Region | 1700106N22Rik | 73582  | 17   | 82920574  | 83288888  | +    |
| 5545 | 1433503_at   | Region | Zadh1         | 77219  | 12   | 81153770  | 81182471  | +    |
| 5546 | 1424980_s_at | Region | Aph1a         | 226548 | 3    | 95381828  | 95386135  | +    |
| 5547 | 1453017_at   | Region | D5ErtD585e    | 71782  | 5    | 109281825 | 109307432 | +    |
| 5548 | 1448007_at   | Region | 5830435C13Rik | 407823 | 2    | 59787511  | 59817573  | -    |
| 5549 | 1458441_at   | Region | Slc6a17       | 229706 | 3    | 107263377 | 107313847 | -    |
| 5550 | 1440385_at   | Region | 9530051E23Rik | 319699 | 3    | 69429902  | 69430806  | +    |
| 5551 | 1427273_at   | Region | D130054N24Rik | 235315 | 9    | 45876943  | 45920129  | -    |



|      |              |        |               |        |    |           |           |   |
|------|--------------|--------|---------------|--------|----|-----------|-----------|---|
| 5552 | 1452756_at   | Region | 0610009J22Rik | 71673  | 11 | 4029989   | 4035959   | + |
| 5553 | 1447685_x_at | Region | Ets2          | 23872  | 16 | 95110358  | 95128440  | + |
| 5554 | 1418577_at   | Region | Trim8         | 93679  | 19 | 46050008  | 46064111  | + |
| 5555 | 1439583_x_at | Region | D130029J02Rik | 234695 | 8  | 104986097 | 104993919 | + |
| 5556 | 1429103_at   | Region | Tomm22        | 223696 | 15 | 79723188  | 79725182  | + |
| 5557 | 1416380_at   | Region | Mov10         | 17454  | 3  | 104221617 | 104245068 | - |
| 5558 | 1439598_at   | Region | Foxo3         | 56484  | 10 | 42292466  | 42383422  | - |
| 5559 | 1449316_at   | Region | Cyp4f15       | 106648 | 17 | 30509817  | 30527507  | + |
| 5560 | 1455214_at   | Region | Mitf          | 17342  | 6  | 98457025  | 98483990  | + |
| 5561 | 1429396_at   | Region | 2410118P20Rik | 73683  | 7  | 95396169  | 95417540  | - |
| 5562 | 1446497_at   | Region | Nav1          | 215690 | 1  | 135289346 | 135436181 | - |
| 5563 | 1455159_at   | Region | 2900057D21Rik | 72993  | 14 | 25057193  | 25108756  | - |
| 5564 | 1454739_at   | Region | Cdc27         | 217232 | 11 | 104326687 | 104371504 | - |
| 5565 | 1444980_at   | Region | C730009D12    | 328974 | 18 | 64623966  | 64624844  | + |
| 5566 | 1429529_at   | Region | Tsen54        | 76265  | 11 | 115635803 | 115644182 | + |
| 5567 | 1456745_x_at | Region | Sdbcag84      | 66366  | 2  | 155465054 | 155475216 | + |
| 5568 | 1438698_at   | Region | 4632425D07Rik | 208213 | 5  | 126411362 | 126733552 | + |
| 5569 | 1441097_at   | Region | None          | None   | 3  | 101582184 | 101583119 | - |
| 5570 | 1420916_at   | Region | Fnbp3         | 56194  | 2  | 53070637  | 53123349  | - |
| 5571 | 1441682_s_at | Region | Xpot          | 73192  | 10 | 121243639 | 121282407 | - |
| 5572 | 1438982_s_at | Region | 2810417J12Rik | 76917  | 17 | 21579098  | 21588259  | - |
| 5573 | 1424539_at   | Region | Ubl4          | 27643  | X  | 69028056  | 69029182  | - |
| 5574 | 1453022_at   | Region | MGI:1915703   | 68453  | 15 | 75646572  | 75648127  | + |
| 5575 | 1440443_at   | Region | E030016H06Rik | 402722 | 2  | 132072859 | 132073496 | - |
| 5576 | 1433681_x_at | Region | Capn3         | 12335  | 2  | 119977722 | 120018348 | + |
| 5577 | 1451489_at   | Region | Slc25a35      | 71998  | 11 | 68693789  | 68698173  | + |
| 5578 | 1434439_at   | Region | Gsk3b         | 56637  | 16 | 36906890  | 37063968  | + |
| 5579 | 1437552_at   | Region | 2410127L17Rik | 67383  | 19 | 17917778  | 17951174  | + |
| 5580 | 1445703_at   | Region | Al848149      | 102944 | X  | 149196633 | 149196936 | - |
| 5581 | 1451039_at   | Region | 2610027L16Rik | 67842  | 14 | 50263729  | 50272080  | + |
| 5582 | 1446091_at   | Region | Anp32b        | 67628  | 4  | 46367037  | 46388445  | + |
| 5583 | 1420912_at   | Region | Aff4          | 93736  | 11 | 53103673  | 53174681  | + |
| 5584 | 1452773_at   | Region | 5730494N06Rik | 70612  | 2  | 131753347 | 131761635 | - |
| 5585 | 1458737_at   | Region | C77097        | 98105  | 18 | 21392040  | 21392910  | - |
| 5586 | 1452303_at   | Region | Arhgef10      | 234094 | 8  | 14307382  | 14378920  | + |
| 5587 | 1435349_at   | Region | Nrp2          | 18187  | 1  | 62996720  | 63108906  | + |
| 5588 | 1438506_s_at | Region | Tprt          | 56075  | 2  | 22857432  | 22877326  | + |
| 5589 | 1421858_at   | Region | Adam17        | 11491  | 12 | 18771955  | 18822033  | + |
| 5590 | 1457043_at   | Region | Gm1057        | 381694 | 5  | 148692189 | 148700421 | + |
| 5591 | 1415833_x_at | Region | Rps29         | 20090  | 12 | 65989514  | 65990859  | - |
| 5592 | 1422540_at   | Region | Fbln1         | 14114  | 15 | 85254610  | 85334255  | + |
| 5593 | 1441687_at   | Region | Wnt4          | 22417  | 4  | 136158896 | 136178040 | + |
| 5594 | 1444780_at   | Region | 5330421F07Rik | 78286  | 7  | 43479111  | 43568752  | + |
| 5595 | 1436736_x_at | Region | D0H4S114      | 27528  | 18 | 33660051  | 33686464  | - |
| 5596 | 1423930_at   | Region | Anapc4        | 52206  | 5  | 51644274  | 51676873  | + |
| 5597 | 1434822_at   | Region | Pphln1        | 223828 | 15 | 93464569  | 93557721  | + |
| 5598 | 1436242_a_at | Region | Cklf          | 75458  | 8  | 103545239 | 103557779 | + |
| 5599 | 1447484_x_at | Region | 2610002F03Rik | 72091  | 2  | 26571927  | 26572166  | - |
| 5600 | 1436733_at   | Region | E130309F12Rik | 272031 | 4  | 48975384  | 49256135  | + |
| 5601 | 1429422_at   | Region | 4933412E12Rik | 71086  | 10 | 116640022 | 116652332 | + |
| 5602 | 1454766_at   | Region | C730024G19Rik | 232566 | 6  | 150093461 | 150124565 | - |
| 5603 | 1428055_at   | Region | Rian          | 75745  | 12 | 105129924 | 105131988 | + |
| 5604 | 1440325_at   | Region | None          | None   | 7  | 86884930  | 86885521  | + |
| 5605 | 1455751_at   | Region | Cand1         | 71902  | 10 | 118778384 | 118938138 | - |
| 5606 | 1443880_at   | Region | Zbtb39        | 320080 | 10 | 127476248 | 127484059 | + |
| 5607 | 1436616_at   | Region | R74740        | 96938  | 1  | 37704144  | 37705174  | + |
| 5608 | 1452105_a_at | Region | Tsc2          | 22084  | 17 | 22400105  | 22436183  | - |
| 5609 | 1451406_a_at | Region | Pcsk5         | 18552  | 19 | 16656932  | 17062422  | - |
| 5610 | 1444485_at   | Region | None          | None   | 6  | 101134893 | 101135531 | - |
| 5611 | 1415892_at   | Region | Sgpl1         | 20397  | 10 | 61060660  | 61110932  | - |
| 5612 | 1450071_at   | Region | Ash1l         | 192195 | 3  | 88709675  | 88822741  | + |
| 5613 | 1458344_at   | Region | Nagpa         | 27426  | 16 | 4864956   | 4873675   | - |
| 5614 | 1426489_s_at | Region | Bfar          | 67118  | 16 | 12408146  | 12438648  | + |
| 5615 | 1418843_at   | Region | Slc30a4       | 22785  | 2  | 122195092 | 122216516 | - |
| 5616 | 1451450_at   | Region | 2010011I20Rik | 67017  | 2  | 171854342 | 171864482 | + |

|      |              |        |               |        |    |           |           |   |
|------|--------------|--------|---------------|--------|----|-----------|-----------|---|
| 5617 | 1448733_at   | Region | Bmi1          | 12151  | 2  | 18719028  | 18728639  | + |
| 5618 | 1425459_at   | Region | Mtmr2         | 77116  | 9  | 13585449  | 13642846  | + |
| 5619 | 1420008_s_at | Region | BC037006      | 211652 | 11 | 35632434  | 35633256  | - |
| 5620 | 1422623_x_at | Region | Rpl41         | 67945  | 10 | 128285207 | 128286206 | - |
| 5621 | 1418938_at   | Region | Dio2          | 13371  | 12 | 86128063  | 86141948  | - |
| 5622 | 1436502_at   | Region | Mtus1         | 102103 | 8  | 39926813  | 40021115  | - |
| 5623 | 1434994_at   | Region | Dedd          | 21945  | 1  | 171267091 | 171270454 | + |
| 5624 | 1453527_a_at | Region | Neurl         | 18011  | 19 | 46730295  | 46810735  | + |
| 5625 | 1441155_at   | Region | 2810446P07Rik | 72745  | 13 | 80317260  | 80390898  | + |
| 5626 | 1416336_s_at | Region | Snrpd1        | 20641  | 18 | 10663140  | 10673574  | + |
| 5627 | 1426984_at   | Region | 2310067B10Rik | 71947  | 11 | 115586611 | 115620126 | + |
| 5628 | 1422553_at   | Region | Pten          | 19211  | 19 | 32083643  | 32146174  | + |
| 5629 | 1428700_at   | Region | P2ry13        | 74191  | 3  | 58857895  | 58860871  | - |
| 5630 | 1438246_at   | Region | Csnk1g1       | 214897 | 9  | 66032337  | 66163764  | + |
| 5631 | 1419353_at   | Region | Dpm1          | 13480  | 2  | 167717793 | 167739104 | - |
| 5632 | 1427254_at   | Region | Zfp445        | 235682 | 9  | 122869105 | 122879937 | - |
| 5633 | 1451569_at   | Region | Nr2c2         | 22026  | 6  | 92539374  | 92616647  | + |
| 5634 | 1450387_s_at | Region | Ak3l1         | 11639  | 4  | 100377949 | 100425900 | + |
| 5635 | 1422573_at   | Region | Ampd3         | 11717  | 7  | 104630686 | 104662745 | + |
| 5636 | 1422555_s_at | Region | Gna13         | 14674  | 11 | 109184029 | 109219306 | + |
| 5637 | 1449733_s_at | Region | Siah1a        | 20437  | 8  | 86007609  | 86029536  | - |
| 5638 | 1451971_at   | Region | Cul4a         | 99375  | 8  | 12484378  | 12526411  | + |
| 5639 | 1435916_at   | Region | 2210410P13Rik | 75684  | 7  | 25195304  | 25196136  | + |
| 5640 | 1418585_at   | Region | Ccnh          | 66671  | 13 | 81281211  | 81305457  | + |
| 5641 | 1450479_x_at | Region | Ptpn12        | 19248  | 5  | 19439215  | 19508367  | - |
| 5642 | 1437394_at   | Region | Centg2        | 347722 | 1  | 89273393  | 89708522  | + |
| 5643 | 1425493_at   | Region | Bmpr1a        | 12166  | 14 | 32547251  | 32638735  | - |
| 5644 | 1425615_a_at | Region | Pck2          | 74551  | 14 | 50057801  | 50067552  | + |
| 5645 | 1431364_a_at | Region | 2810047C21Rik | 72716  | 7  | 6837010   | 7126349   | + |
| 5646 | 1428399_a_at | Region | 4930438O05Rik | 78795  | 1  | 85961103  | 86084595  | + |
| 5647 | 1441192_at   | Region | Scly          | 50880  | 1  | 91121380  | 91144116  | + |
| 5648 | 1456501_at   | Region | 2610528E23Rik | 66497  | 16 | 56210874  | 56232420  | - |
| 5649 | 1452052_s_at | Region | Eif3s1        | 78655  | 2  | 121561316 | 121567484 | + |
| 5650 | 1452043_at   | Region | 2310011J03Rik | 66374  | 10 | 80443263  | 80445524  | - |
| 5651 | 1460562_at   | Region | Eftud1        | 101592 | 7  | 76505164  | 76634375  | + |
| 5652 | 1448282_at   | Region | Plrg1         | 53317  | 3  | 82784505  | 82801258  | + |
| 5653 | 1416834_x_at | Region | Ndufb2        | 68198  | 6  | 39728013  | 39734901  | + |
| 5654 | 1447139_at   | Region | Bcl7c         | 12055  | 7  | 121754709 | 121758497 | - |
| 5655 | 1446304_at   | Region | None          | None   | 5  | 104869313 | 104869985 | + |
| 5656 | 1442587_at   | Region | C130076O07Rik | 319504 | 12 | 40985533  | 41346376  | + |
| 5657 | 1446235_at   | Region | None          | None   | 3  | 126705757 | 126706414 | - |
| 5658 | 1428607_at   | Region | None          | None   | X  | 19087499  | 19091832  | + |
| 5659 | 1458330_x_at | Region | Cnnm3         | 94218  | 1  | 36807398  | 36820275  | + |
| 5660 | 1449236_at   | Region | Dll3          | 13389  | 7  | 23691404  | 23699388  | - |
| 5661 | 1444779_s_at | Region | Zfp59         | 22717  | 7  | 23185040  | 23248345  | + |
| 5662 | 1455629_at   | Region | Drd1a         | 13488  | 13 | 52615891  | 52619894  | - |
| 5663 | 1427111_s_at | Region | 1300006N24Rik | 71766  | 9  | 20950505  | 20975490  | - |
| 5664 | 1416315_at   | Region | Abhd4         | 105501 | 14 | 48779225  | 48789095  | + |
| 5665 | 1449530_at   | Region | Trps1         | 83925  | 15 | 50659276  | 50888038  | - |
| 5666 | 1428550_at   | Region | 1810015A11Rik | 69101  | 16 | 15917957  | 15919874  | + |
| 5667 | 1437833_at   | Region | Ltbp3         | 16998  | 19 | 5530917   | 5547315   | + |
| 5668 | 1416095_x_at | Region | 1110005A23Rik | 66118  | 10 | 128559009 | 128614707 | + |
| 5669 | 1460548_a_at | Region | Eral1         | 57837  | 11 | 77799035  | 77806004  | - |
| 5670 | 1442899_at   | Region | None          | None   | 5  | 135927893 | 135928527 | + |
| 5671 | 1460342_s_at | Region | AA536749      | 26936  | 11 | 59388161  | 59501851  | + |
| 5672 | 1439181_at   | Region | BC043301      | 210104 | 7  | 37639789  | 37650611  | + |
| 5673 | 1453715_at   | Region | Sv2c          | 75209  | 13 | 92166381  | 92323903  | - |
| 5674 | 1455613_at   | Region | E130308A19Rik | 230259 | 4  | 59569847  | 59664423  | + |
| 5675 | 1452581_at   | Region | 2610304G08Rik | 70470  | 2  | 157485763 | 157534289 | + |
| 5676 | 1426698_a_at | Region | Hnrpm         | 76936  | 17 | 31345420  | 31384514  | - |
| 5677 | 1451745_a_at | Region | Znhit1        | 70103  | 5  | 135995323 | 136001004 | - |
| 5678 | 1429066_at   | Region | 4930565B19Rik | 75325  | 5  | 121391846 | 121392547 | - |
| 5679 | 1427505_a_at | Region | Cradd         | 12905  | 10 | 95150586  | 95300324  | - |
| 5680 | 1441481_at   | Region | Mfap3l        | 71306  | 8  | 59692537  | 59709342  | + |
| 5681 | 1421054_at   | Region | Xpo4          | 57258  | 14 | 52117369  | 52199998  | - |

|      |              |        |               |        |      |           |           |      |
|------|--------------|--------|---------------|--------|------|-----------|-----------|------|
| 5682 | 1448632_at   | Region | Psemb10       | 19171  | 8    | 105231611 | 105233952 | -    |
| 5683 | 1423864_at   | Region | Nrbp          | 192292 | 5    | 29699856  | 29710501  | +    |
| 5684 | 1437419_at   | Region | Bmp2k         | 140780 | 5    | 96015785  | 96109144  | +    |
| 5685 | 1431133_at   | Region | Arhgap18      | 73910  | 10   | 26772308  | 26918428  | +    |
| 5686 | 1426862_at   | Region | 9130023F12Rik | 216549 | 11   | 20579877  | 20636277  | -    |
| 5687 | 1423794_at   | Region | D2ErtD391e    | 51897  | 2    | 91379374  | 91415325  | -    |
| 5688 | 1428078_at   | Region | 0610013E23Rik | 76892  | 11   | 86212649  | 86226999  | +    |
| 5689 | 1416653_at   | Region | Stxbp3        | 20912  | 3    | 108588922 | 108636244 | -    |
| 5690 | 1424185_a_at | Region | Morf4l1       | 21761  | 9    | 89979040  | 90001962  | -    |
| 5691 | 1428015_at   | Region | D12Wsu118e    | 28115  | NONE | NONE      | NONE      | NONE |
| 5692 | 1428783_at   | Region | Prkar2a       | 19087  | 9    | 108741435 | 108795663 | +    |
| 5693 | 1424735_at   | Region | Slc25a25      | 227731 | 2    | 32346649  | 32383584  | -    |
| 5694 | 1453141_at   | Region | 0610009L18Rik | 66838  | 11   | 120169817 | 120172300 | +    |
| 5695 | 1444185_at   | Region | Stim2         | 116873 | 5    | 52808660  | 52930070  | +    |
| 5696 | 1426763_at   | Region | Oaz2          | 18247  | 9    | 65798855  | 65812562  | +    |
| 5697 | 1415709_s_at | Region | Gbf1          | 107338 | 19   | 45699725  | 45833852  | +    |
| 5698 | 1418030_at   | Region | Slco3a1       | 108116 | 7    | 68181298  | 68451736  | -    |
| 5699 | 1458141_at   | Region | ---           | 382344 | 10   | 20292074  | 20327184  | -    |
| 5700 | 1419397_at   | Region | Pola1         | 18968  | X    | 87965425  | 88292813  | -    |
| 5701 | 1453562_a_at | Region | 1110025F24Rik | 67824  | 16   | 4382757   | 4390413   | -    |
| 5702 | 1427809_at   | Region | Lphn3         | 319387 | 5    | 80275281  | 81049432  | +    |
| 5703 | 1425538_x_at | Region | Ceacam1       | 26365  | 7    | 20682164  | 20703996  | -    |
| 5704 | 1441970_at   | Region | E430010N07Rik | 399572 | X    | 129310000 | 129311316 | +    |
| 5705 | 1417385_at   | Region | Npepps        | 19155  | 11   | 97028020  | 97101650  | -    |
| 5706 | 1416588_at   | Region | Ptpn          | 19275  | 1    | 75534602  | 75554785  | -    |
| 5707 | 1453122_at   | Region | 4921533L14Rik | 68187  | 1    | 24256337  | 24331230  | -    |
| 5708 | 1417001_a_at | Region | D4Wsu53e      | 27981  | 4    | 133884543 | 133888276 | +    |
| 5709 | 1436233_at   | Region | Al117581      | 103629 | 11   | 48918423  | 48918694  | -    |
| 5710 | 1451327_a_at | Region | Tmed1         | 17083  | 9    | 21396609  | 21399241  | -    |
| 5711 | 1453079_at   | Region | 5730494M16Rik | 66648  | 18   | 25367107  | 25397117  | -    |
| 5712 | 1440976_at   | Region | 1110035M17Rik | 432396 | 11   | 95521193  | 95533826  | -    |
| 5713 | 1427891_at   | Region | Gimap6        | 231931 | 6    | 48834349  | 48841010  | -    |
| 5714 | 1426295_at   | Region | Hapln1        | 12950  | 13   | 85655519  | 85726506  | +    |
| 5715 | 1446861_at   | Region | Gns           | 75612  | 10   | 121021344 | 121053499 | +    |
| 5716 | 1430857_s_at | Region | Pex11c        | 69129  | 8    | 4142      | 7868      | +    |
| 5717 | 1426879_at   | Region | 1190005F20Rik | 98685  | 1    | 151291502 | 151313933 | +    |
| 5718 | 1434246_at   | Region | L3mbtl3       | 237339 | 10   | 26275100  | 26374931  | -    |
| 5719 | 1439501_at   | Region | Cbara1        | 216001 | 10   | 59664687  | 59819557  | +    |
| 5720 | 1424222_s_at | Region | Rad23b        | 19359  | 4    | 55265936  | 55307091  | +    |
| 5721 | 1457252_x_at | Region | Pld2          | 18806  | 11   | 70265822  | 70283768  | +    |
| 5722 | 1434552_at   | Region | Wdr77         | 70465  | 3    | 105755327 | 105765589 | +    |
| 5723 | 1423936_at   | Region | Kctd5         | 69259  | 17   | 21851732  | 21877431  | -    |
| 5724 | 1434303_at   | Region | Raph1         | 77300  | 1    | 60786474  | 60811912  | -    |
| 5725 | 1456555_at   | Region | 4933401K09Rik | 234964 | 9    | 15398505  | 15452293  | -    |
| 5726 | 1454976_at   | Region | None          | None   | 17   | 11514068  | 11515174  | -    |
| 5727 | 1460325_at   | Region | Pum1          | 80912  | 4    | 129460274 | 129578157 | +    |
| 5728 | 1424883_s_at | Region | Sfrs7         | 225027 | 17   | 78017474  | 78024683  | -    |
| 5729 | 1417321_at   | Region | Zcchc7        | 28027  | 4    | 44840075  | 44848124  | +    |
| 5730 | 1438516_at   | Region | Rif1          | 51869  | 2    | 52004994  | 52054222  | +    |
| 5731 | 1440478_at   | Region | D10ErtD438e   | 52014  | 10   | 52670740  | 52691207  | +    |
|      |              |        | Rps6 ///      |        |      |           |           |      |
|      |              |        | LOC214738 /// |        |      |           |           |      |
|      |              |        | LOC216036 /// |        |      |           |           |      |
|      |              |        | LOC434404 /// |        |      |           |           |      |
| 5732 | 1435816_at   | Region | LOC545640     | 20104  | 4    | 85840854  | 85843549  | -    |
|      |              |        | Hnrpa1 ///    |        |      |           |           |      |
| 5733 | 1430020_x_at | Region | LOC225307     | 15382  | 15   | 103302595 | 103308263 | +    |
| 5734 | 1443896_at   | Region | Tbc1d5        | 72238  | 17   | 48265628  | 48712039  | -    |
| 5735 | 1417436_at   | Region | Large         | 16795  | 8    | 71965827  | 72364115  | -    |
| 5736 | 1426189_at   | Region | Dusp15        | 252864 | 2    | 152401869 | 152408341 | -    |
| 5737 | 1437030_at   | Region | Plcd4         | 18802  | 1    | 74846994  | 74868444  | +    |
| 5738 | 1454670_at   | Region | Rere          | 68703  | 4    | 148898702 | 149114159 | +    |
| 5739 | 1449702_at   | Region | AA407930      | 100494 | 5    | 138468708 | 138481909 | -    |
| 5740 | 1438078_at   | Region | None          | None   | 11   | 88856266  | 88857359  | -    |
| 5741 | 1436808_x_at | Region | Mcm5          | 17218  | 8    | 74273686  | 74291750  | +    |

|      |              |        |               |        |      |           |           |      |
|------|--------------|--------|---------------|--------|------|-----------|-----------|------|
| 5742 | 1453011_at   | Region | Dhrs6         | 69772  | 3    | 134164214 | 134187348 | +    |
| 5743 | 1424801_at   | Region | Enah          | 13800  | 1    | 181864370 | 181978518 | -    |
| 5744 | 1438091_a_at | Region | H2afz         | 51788  | 3    | 136753528 | 136755851 | +    |
| 5745 | 1423924_s_at | Region | Tspan14       | 52588  | 14   | 39051271  | 39079112  | -    |
| 5746 | 1428374_at   | Region | MGI:2136405   | 93683  | 9    | 62180047  | 62242646  | -    |
| 5747 | 1440671_at   | Region | A130012E19Rik | 320235 | 10   | 115082377 | 115082896 | +    |
| 5748 | 1425934_a_at | Region | B4galt4       | 56375  | 16   | 37563886  | 37590567  | +    |
| 5749 | 1451979_at   | Region | Kras          | 16653  | 6    | 146066254 | 146096662 | -    |
| 5750 | 1435815_at   | Region | Ldoc1         | 434784 | X    | 56378815  | 56379550  | +    |
| 5751 | 1420948_s_at | Region | 4833408C14Rik | 67403  | X    | 100400840 | 100530738 | -    |
| 5752 | 1423201_at   | Region | Ncor1         | 20185  | 11   | 62043183  | 62164152  | -    |
| 5753 | 1427937_at   | Region | None          | None   | X    | 66477436  | 66483670  | +    |
| 5754 | 1452387_a_at | Region | Amotl2        | 56332  | 9    | 102673186 | 102684065 | +    |
| 5755 | 1459693_x_at | Region | Ywhag         | 22628  | 5    | 134921901 | 134948016 | -    |
| 5756 | 1455317_at   | Region | Epc2          | 227867 | 2    | 49383678  | 49483345  | +    |
| 5757 | 1415816_at   | Region | Cct7          | 12468  | 6    | 85801989  | 85818388  | +    |
| 5758 | 1447005_at   | Region | None          | None   | NONE | NONE      | NONE      | NONE |
| 5759 | 1427606_at   | Region | Usp27x        | 54651  | X    | 5610216   | 5614766   | -    |
| 5760 | 1452082_at   | Region | 6430548M08Rik | 234797 | 8    | 119500738 | 119518927 | +    |
| 5761 | 1452450_at   | Region | Atp8b2        | 54667  | 3    | 89745559  | 89769413  | -    |
| 5762 | 1427951_s_at | Region | 1700009P13Rik | 215814 | 10   | 18141400  | 18159451  | -    |
| 5763 | 1417815_a_at | Region | Tde1          | 26943  | 2    | 163080242 | 163102100 | -    |
| 5764 | 1434129_s_at | Region | Lhfp12        | 218454 | 13   | 90241860  | 90379474  | +    |
| 5765 | 1415715_at   | Region | None          | None   | 5    | 32142070  | 32144343  | -    |
| 5766 | 1434425_at   | Region | AI597080      | 99681  | 3    | 93165763  | 93166219  | +    |
| 5767 | 1435242_at   | Region | Aprin         | 100710 | 5    | 149615145 | 149749995 | +    |
| 5768 | 1415704_a_at | Region | Cdv3          | 321022 | 9    | 103328549 | 103340979 | -    |
| 5769 | 1434979_at   | Region | 4933403F05Rik | 108654 | 18   | 68497464  | 68531006  | -    |
| 5770 | 1415982_at   | Region | 5031400M07Rik | 80517  | 9    | 25003408  | 25046786  | -    |
| 5771 | 1434509_at   | Region | Rapgef6       | 192786 | 11   | 54450466  | 54452127  | +    |
| 5772 | 1450084_s_at | Region | Ivns1abp      | 117198 | 1    | 151200258 | 151220009 | +    |
| 5773 | 1450385_at   | Region | Kpna3         | 16648  | 14   | 55898702  | 55974523  | -    |
| 5774 | 1417728_at   | Region | Mbd3          | 17192  | 10   | 80523342  | 80530300  | -    |
| 5775 | 1431782_s_at | Region | Ypel1         | 106369 | 16   | 15841589  | 15857966  | +    |
| 5776 | 1452680_at   | Region | Snrpd2        | 107686 | 7    | 16018599  | 16021487  | +    |
| 5777 | 1435470_at   | Region | None          | None   | 8    | 19654535  | 19655405  | +    |
| 5778 | 1437083_at   | Region | A830020B06Rik | 271711 | 1    | 72582077  | 72600701  | +    |
| 5779 | 1423540_at   | Region | Rbms2         | 56516  | 10   | 127870047 | 127913260 | -    |
| 5780 | 1460319_at   | Region | Fut8          | 53618  | 12   | 74095608  | 74332578  | +    |
| 5781 | 1428247_at   | Region | 2310075A12Rik | 69091  | 9    | 26901688  | 26924026  | -    |
| 5782 | 1421850_at   | Region | Mtap1b        | 17755  | 13   | 95613359  | 95705305  | -    |
| 5783 | 1424697_at   | Region | Dtwd1         | 69185  | 2    | 125666028 | 125679129 | +    |
| 5784 | 1433927_at   | Region | E430026A01Rik | 231915 | 5    | 148087253 | 148114739 | +    |
| 5785 | 1432447_a_at | Region | 2310005N01Rik | 70088  | 4    | 124112260 | 124137002 | +    |
| 5786 | 1437593_x_at | Region | Api5          | 11800  | 2    | 94116415  | 94142756  | -    |
| 5787 | 1431275_at   | Region | Chaf1b        | 110749 | 16   | 93055266  | 93077291  | +    |
| 5788 | 1415838_at   | Region | Tde2          | 56442  | 10   | 57778279  | 57794950  | -    |
| 5789 | 1423721_at   | Region | Tpm1          | 22003  | 9    | 67151552  | 67178023  | -    |
| 5790 | 1425342_a_at | Region | Kcnk3         | 16527  | 5    | 29047028  | 29082424  | +    |
| 5791 | 1446299_at   | Region | 6720456B07Rik | 101314 | 6    | 114172603 | 114184782 | +    |
| 5792 | 1442276_at   | Region | Lphn3         | 319387 | 5    | 80275281  | 81049432  | +    |
| 5793 | 1450844_at   | Region | Stx6          | 58244  | 1    | 155049479 | 155094254 | +    |
| 5794 | 1450395_at   | Region | Slc22a5       | 20520  | 11   | 53617383  | 53644501  | -    |
| 5795 | 1422992_s_at | Region | Pik3ccd       | 18707  | 4    | 148143002 | 148155646 | -    |
| 5796 | 1424214_at   | Region | 9130213B05Rik | 231440 | 5    | 90839183  | 90945494  | +    |
| 5797 | 1441106_at   | Region | Za20d2        | 22682  | 19   | 20510205  | 20520216  | +    |
| 5798 | 1434299_x_at | Region | Rabl4         | 67042  | 15   | 78211456  | 78226101  | -    |
| 5799 | 1428960_at   | Region | 4933434I06Rik | 71233  | 2    | 21222741  | 21247375  | -    |
| 5800 | 1444613_at   | Region | None          | None   | 8    | 80738819  | 80739041  | +    |
| 5801 | 1456467_s_at | Region | Nlk           | 18099  | 11   | 78292827  | 78423032  | -    |
| 5802 | 1417442_a_at | Region | Pex3          | 56535  | 10   | 13405906  | 13434917  | -    |
| 5803 | 1450041_a_at | Region | Tub           | 22141  | 7    | 102863841 | 102883914 | +    |
| 5804 | 1441663_at   | Region | None          | None   | 15   | 93635671  | 93636268  | -    |
| 5805 | 1416693_at   | Region | Foxc2         | 14234  | 8    | 120472104 | 120474416 | +    |
| 5806 | 1425212_a_at | Region | Tnfrsf19      | 29820  | 14   | 55499179  | 55581612  | -    |

|      |              |        |               |        |    |           |           |   |
|------|--------------|--------|---------------|--------|----|-----------|-----------|---|
| 5807 | 1417467_a_at | Region | Tada3l        | 101206 | 6  | 113934484 | 113945349 | - |
| 5808 | 1451220_at   | Region | 2310040A13Rik | 69641  | 12 | 106213222 | 106270262 | + |
| 5809 | 1460635_at   | Region | Fastk         | 66587  | 5  | 22904937  | 22908267  | - |
| 5810 | 1460574_at   | Region | Fat4          | 329628 | 3  | 38357245  | 38481982  | + |
| 5811 | 1440908_at   | Region | D030063E12    | 328530 | 15 | 38990884  | 38992880  | - |
| 5812 | 1433812_at   | Region | Lix1l         | 280411 | 3  | 96089184  | 96112327  | + |
| 5813 | 1456109_a_at | Region | Mrps15        | 66407  | 4  | 125074041 | 125082649 | + |
| 5814 | 1443951_at   | Region | C230076A16Rik | 320496 | 3  | 137031723 | 137032591 | - |
| 5815 | 1417196_s_at | Region | D8ErtD594e    | 52357  | 8  | 46797192  | 46960652  | - |
| 5816 | 1431388_at   | Region | Mphosph10     | 67973  | 7  | 58155241  | 58166183  | - |
| 5817 | 1434938_at   | Region | Rbm9          | 93686  | 15 | 77134294  | 77358885  | - |
| 5818 | 1416740_at   | Region | Col5a1        | 12831  | 2  | 27818847  | 27969686  | + |
| 5819 | 1428759_s_at | Region | 1300013D05Rik | 67480  | 11 | 97566702  | 97587643  | - |
| 5820 | 1456130_at   | Region | LOC553901     | 553091 | 6  | 12295318  | 12296311  | - |
| 5821 | 1426616_at   | Region | 0610007A15Rik | 68385  | 11 | 77904425  | 77906431  | + |
|      |              |        | Rps9 ///      |        |    |           |           |   |
| 5822 | 1426958_at   | Region | LOC546015     | 546015 | 7  | 135574033 | 135580491 | - |
| 5823 | 1419104_at   | Region | Abhd6         | 66082  | 14 | 5671130   | 5724783   | + |
| 5824 | 1425790_a_at | Region | Grik2         | 14806  | 10 | 49284376  | 49966826  | - |
| 5825 | 1424289_at   | Region | BC010311      | 209212 | 4  | 15924086  | 15940842  | - |
| 5826 | 1441183_at   | Region | Jmjd2b        | 193796 | 17 | 53963133  | 54039904  | + |
| 5827 | 1422639_at   | Region | Calcb         | 116903 | 7  | 108577837 | 108582423 | + |
| 5828 | 1436390_a_at | Region | MGI:2385186   | 229725 | 3  | 108449989 | 108473754 | + |
| 5829 | 1426499_at   | Region | Sh3glb2       | 227700 | 2  | 30276971  | 30291393  | - |
| 5830 | 1418496_at   | Region | Foxa1         | 15375  | 12 | 54272111  | 54277439  | - |
| 5831 | 1434258_s_at | Region | Phactr4       | 100169 | 4  | 131116497 | 131182926 | - |
| 5832 | 1437508_at   | Region | Sp4           | 20688  | 12 | 114051387 | 114115389 | - |
| 5833 | 1435093_at   | Region | Zfyve20       | 78287  | 6  | 92634150  | 92662609  | - |
| 5834 | 1451970_at   | Region | E330036I19Rik | 231871 | 5  | 142522593 | 142562419 | + |
| 5835 | 1455543_at   | Region | Klhl18        | 270201 | 9  | 110467462 | 110517991 | - |
| 5836 | 1459348_at   | Region | Ebf1          | 13591  | 11 | 44370971  | 44758012  | + |
| 5837 | 1417566_at   | Region | Abhd5         | 67469  | 9  | 122371891 | 122401684 | + |
| 5838 | 1423573_at   | Region | Srd5a2l       | 57357  | 5  | 75385516  | 75400710  | + |
| 5839 | 1435106_at   | Region | None          | None   | 5  | 65822281  | 65823300  | + |
| 5840 | 1452951_at   | Region | 2410089E03Rik | 73692  | 15 | 7956639   | 8058734   | + |
| 5841 | 1459858_x_at | Region | Crtac1        | 72832  | 19 | 41827441  | 41976053  | - |
| 5842 | 1429267_at   | Region | Thea          | 329910 | 4  | 105703485 | 105758671 | - |
| 5843 | 1441549_at   | Region | 4931408L03Rik | 78266  | 3  | 94494533  | 94503069  | - |
| 5844 | 1448531_at   | Region | Lmn2          | 16907  | 10 | 81033305  | 81049800  | - |
| 5845 | 1440564_at   | Region | Gpr731        | 246313 | 2  | 131885018 | 131899253 | - |
| 5846 | 1437880_at   | Region | Lbxcor1       | 207667 | 9  | 63259400  | 63268242  | - |
| 5847 | 1450803_at   | Region | Ntf3          | 18205  | 6  | 126767210 | 126830735 | - |
| 5848 | 1460584_at   | Region | B430315C20Rik | 327655 | 2  | 120824412 | 120864866 | - |
| 5849 | 1443338_at   | Region | None          | None   | 2  | 49057871  | 49058162  | + |
| 5850 | 1434041_at   | Region | Appbp2        | 66884  | 11 | 84919300  | 84963112  | - |
| 5851 | 1448413_at   | Region | 2410016O06Rik | 71952  | 12 | 80815051  | 80817327  | + |
| 5852 | 1449655_a_at | Region | 1300018I05Rik | 74157  | 17 | 27470422  | 27513276  | + |
| 5853 | 1421810_at   | Region | Dgcr2         | 13356  | 16 | 16612273  | 16662559  | - |
| 5854 | 1452939_a_at | Region | Pitpnc1       | 71795  | 11 | 107033195 | 107291788 | - |
| 5855 | 1442320_at   | Region | LOC553096     | 553096 | 19 | 15467392  | 15467899  | + |
| 5856 | 1430043_at   | Region | Ttc19         | 72795  | 11 | 62007122  | 62040890  | + |
| 5857 | 1416131_s_at | Region | C920006C10Rik | 76740  | 15 | 65810937  | 65897708  | + |
| 5858 | 1436220_at   | Region | Zfp287        | 170740 | 11 | 62438937  | 62454743  | - |
| 5859 | 1428691_at   | Region | 5630401D06Rik | 71437  | 7  | 67319558  | 67321791  | - |
| 5860 | 1422511_a_at | Region | Ogfr          | 72075  | 2  | 180306419 | 180312789 | + |
| 5861 | 1456615_a_at | Region | Falz          | 207165 | 11 | 106856593 | 106978743 | - |
| 5862 | 1433946_at   | Region | Zik1          | 22775  | 7  | 8786037   | 8794152   | - |
| 5863 | 1417737_at   | Region | Mrps31        | 57312  | 8  | 21163591  | 21181648  | + |
| 5864 | 1427592_at   | Region | Pcdh7         | 54216  | 5  | 56521609  | 56532964  | + |
| 5865 | 1419205_x_at | Region | Gpatc4        | 66614  | 3  | 87786988  | 87799852  | + |
| 5866 | 1441409_at   | Region | AI449705      | 103220 | 10 | 86680474  | 86751505  | + |
| 5867 | 1445264_at   | Region | Catsper2      | 212670 | 2  | 120908208 | 120927384 | - |
| 5868 | 1455935_at   | Region | 2410131K14Rik | 76792  | 5  | 117373963 | 117392047 | + |
| 5869 | 1443225_at   | Region | Acvr1c        | 269275 | 2  | 58197361  | 58241564  | - |
| 5870 | 1435809_at   | Region | LOC545554     | 545554 | 3  | 96086860  | 96087615  | + |

|      |              |        |               |        |      |           |           |      |
|------|--------------|--------|---------------|--------|------|-----------|-----------|------|
| 5871 | 1416704_at   | Region | Mapk14        | 26416  | 17   | 26492551  | 26549631  | +    |
| 5872 | 1427345_a_at | Region | Sult1a1       | 20887  | 7    | 120722601 | 120726088 | -    |
| 5873 | 1428972_at   | Region | 0610012D17Rik | 66061  | 16   | 31229115  | 31238469  | +    |
| 5874 | 1433557_at   | Region | Cbx7          | 52609  | 15   | 79965309  | 79984931  | -    |
| 5875 | 1416308_at   | Region | Ugdh          | 22235  | 5    | 64215050  | 64237671  | -    |
| 5876 | 1450656_at   | Region | Gna13         | 14674  | 11   | 109184029 | 109219306 | +    |
| 5877 | 1421629_at   | Region | Gabre         | 14404  | X    | 66918087  | 66935376  | -    |
| 5878 | 1424501_at   | Region | 4732497O03Rik | 216987 | 11   | 79659615  | 79688046  | -    |
| 5879 | 1444909_at   | Region | Gm574         | 213948 | 5    | 22848078  | 22856040  | -    |
| 5880 | 1443988_at   | Region | B330012G18Rik | 320419 | 2    | 155610458 | 155611210 | -    |
| 5881 | 1435479_at   | Region | None          | None   | 2    | 172328482 | 172329344 | -    |
| 5882 | 1438268_at   | Region | Mnab          | 319817 | 2    | 37306963  | 37355065  | -    |
| 5883 | 1416417_a_at | Region | Ndufb7        | 66916  | 8    | 82824283  | 82829148  | +    |
| 5884 | 1428468_at   | Region | 3110043O21Rik | 73205  | 4    | 35330354  | 35365190  | -    |
| 5885 | 1439884_at   | Region | Nudt16        | 75686  | 9    | 105111048 | 105113181 | -    |
| 5886 | 1428403_at   | Region | 2410025L10Rik | 381668 | 5    | 109413571 | 109437880 | -    |
| 5887 | 1430533_a_at | Region | Ctnnb1        | 12387  | 9    | 120945869 | 120972901 | +    |
| 5888 | 1439498_at   | Region | Punc          | 19289  | 9    | 65263454  | 65308137  | +    |
| 5889 | 1415961_at   | Region | Itn2c         | 64294  | 1    | 85700921  | 85715048  | +    |
| 5890 | 1437966_at   | Region | B230206N24Rik | 210673 | 6    | 114064130 | 114069723 | -    |
| 5891 | 1459497_at   | Region | Fdft1         | 14137  | 14   | 57675741  | 57708384  | -    |
| 5892 | 1448498_at   | Region | Rps6ka4       | 56613  | 19   | 6542932   | 6554449   | -    |
| 5893 | 1454657_s_at | Region | Mak10         | 78689  | 13   | 58245009  | 58294396  | +    |
| 5894 | 1437936_at   | Region | LOC434778     | 434778 | X    | 47311398  | 47319850  | +    |
| 5895 | 1433150_at   | Region | 4933415B22Rik | 71178  | 5    | 111437201 | 111438462 | -    |
| 5896 | 1439105_at   | Region | Cdadc1        | 71891  | 14   | 54094451  | 54133002  | -    |
| 5897 | 1445465_at   | Region | N28178        | 230085 | 4    | 42833173  | 42857529  | +    |
| 5898 | 1448471_a_at | Region | Ctla2a        | 13024  | 13   | 59552384  | 59592485  | -    |
| 5899 | 1435333_at   | Region | 1110007M04Rik | 68493  | 4    | 25033642  | 25037728  | +    |
| 5900 | 1456567_x_at | Region | Grn           | 14824  | 11   | 102251594 | 102257892 | +    |
| 5901 | 1433880_at   | Region | Dnajc11       | 230935 | 4    | 150426093 | 150469046 | +    |
| 5902 | 1421022_x_at | Region | Acyp1         | 66204  | 12   | 82141604  | 82149527  | -    |
| 5903 | 1439448_x_at | Region | Tmed9         | 67511  | 13   | 54209701  | 54214246  | +    |
| 5904 | 1444856_at   | Region | Crebbp        | 12914  | 16   | 3785202   | 3786206   | -    |
| 5905 | 1451768_a_at | Region | Slc20a2       | 20516  | 8    | 21228953  | 21324191  | +    |
| 5906 | 1451042_a_at | Region | Mina          | 67014  | 16   | 58457856  | 58478079  | +    |
| 5907 | 1421199_at   | Region | Dlgh2         | 23859  | 7    | 85860491  | 86494465  | +    |
| 5908 | 1439074_a_at | Region | Son           | 20658  | 16   | 90805044  | 90836353  | +    |
| 5909 | 1450382_at   | Region | Nf2           | 18016  | 11   | 4662781   | 4744337   | -    |
| 5910 | 1426624_a_at | Region | Ypel3         | 66090  | 7    | 120826706 | 120830240 | +    |
| 5911 | 1450427_at   | Region | Chrna6        | 11440  | 8    | 26172766  | 26183611  | -    |
| 5912 | 1436344_at   | Region | 5830404H04Rik | 207781 | 16   | 97343062  | 97406898  | -    |
| 5913 | 1431921_a_at | Region | Stag1         | 20842  | 9    | 100545170 | 100860091 | +    |
| 5914 | 1436106_x_at | Region | 2310015A05Rik | 72315  | 16   | 16417438  | 16421706  | +    |
| 5915 | 1435059_at   | Region | Ddef1         | 13196  | 15   | 64104369  | 64365898  | -    |
| 5916 | 1436878_at   | Region | Baal          | 118452 | 15   | 38833124  | 38850257  | +    |
| 5917 | 1456904_at   | Region | None          | None   | 11   | 97009053  | 97010427  | +    |
| 5918 | 1453036_at   | Region | 5430439M09Rik | 71348  | 17   | 92845573  | 92847457  | +    |
| 5919 | 1447381_at   | Region | None          | None   | NONE | NONE      | NONE      | NONE |
| 5920 | 1416089_at   | Region | Rps15         | 20054  | 10   | 80417366  | 80419021  | +    |
| 5921 | 1460004_x_at | Region | Stx6          | 58244  | 1    | 155049479 | 155094254 | +    |
| 5922 | 1451381_at   | Region | 1810020D17Rik | 66273  | 7    | 91596611  | 91625686  | -    |
| 5923 | 1429260_at   | Region | 1810014B01Rik | 544717 | 10   | 82507736  | 82511798  | -    |
| 5924 | 1453737_at   | Region | 5730509C05Rik | 68524  | 11   | 98684896  | 98724607  | +    |
| 5925 | 1446101_at   | Region | Rere          | 68703  | 4    | 148898702 | 149114159 | +    |
| 5926 | 1438714_at   | Region | Zfp207        | 22680  | 11   | 80109005  | 80121796  | +    |
| 5927 | 1444376_at   | Region | Sesn1         | 140742 | 10   | 42008166  | 42008843  | +    |
| 5928 | 1447816_x_at | Region | BC019806      | 218885 | 14   | 30218148  | 30235400  | +    |
| 5929 | 1454723_at   | Region | 1110033M05Rik | 68675  | 13   | 73773385  | 74230386  | +    |
| 5930 | 1445502_at   | Region | None          | None   | 8    | 93608483  | 93609066  | +    |
| 5931 | 1426682_at   | Region | Cnot6         | 104625 | 11   | 49427539  | 49465551  | -    |
| 5932 | 1433938_at   | Region | Trp53bp2      | 209456 | 1    | 182387965 | 182421393 | +    |
| 5933 | 1426386_at   | Region | Rpl7l1        | 66229  | 17   | 44284905  | 44294348  | -    |
| 5934 | 1447150_at   | Region | Phr1          | 105689 | 14   | 97658865  | 97891435  | -    |
| 5935 | 1433325_at   | Region | 9330154F10Rik | 77554  | 4    | 67891745  | 67892824  | -    |

|      |              |        |               |        |    |           |           |   |
|------|--------------|--------|---------------|--------|----|-----------|-----------|---|
| 5936 | 1419313_at   | Region | Ccnt1         | 12455  | 15 | 98601104  | 98626096  | - |
| 5937 | 1415751_at   | Region | Hp1bp3        | 15441  | 4  | 137097923 | 137124421 | + |
| 5938 | 1455967_at   | Region | Sorbs1        | 20411  | 19 | 39839082  | 40058071  | - |
| 5939 | 1455583_at   | Region | Gne           | 50798  | 4  | 43952748  | 44000088  | - |
| 5940 | 1415736_at   | Region | Pfdn5         | 56612  | 15 | 102386650 | 102391967 | + |
| 5941 | 1448496_a_at | Region | Ing1          | 26356  | 8  | 10928492  | 10935676  | + |
| 5942 | 1418589_a_at | Region | Mlf1          | 17349  | 3  | 67046502  | 67072273  | + |
| 5943 | 1445857_at   | Region | None          | None   | 1  | 157364166 | 157398213 | + |
| 5944 | 1450384_at   | Region | Bace1         | 23821  | 9  | 45851835  | 45875693  | + |
| 5945 | 1427944_at   | Region | C1qdc1        | 232560 | 6  | 149778375 | 149832094 | - |
| 5946 | 1428707_at   | Region | 2610009E16Rik | 69202  | 6  | 125570449 | 125574707 | - |
| 5947 | 1425805_a_at | Region | Usp12         | 22217  | 5  | 145626505 | 145686649 | - |
| 5948 | 1416017_at   | Region | Copg          | 54161  | 6  | 88324602  | 88350257  | + |
| 5949 | 1429591_at   | Region | Tacc1         | 320165 | 8  | 23877518  | 23925420  | - |
| 5950 | 1434276_x_at | Region | BC004004      | 80748  | 17 | 27090378  | 27115403  | + |
| 5951 | 1440449_at   | Region | 2610040E16Rik | 67144  | 3  | 157046099 | 157077874 | + |
| 5952 | 1451740_at   | Region | Paip1         | 218693 | 13 | 232       | 27441     | + |
| 5953 | 1447084_at   | Region | Nfatc1        | 18018  | 18 | 80729557  | 80836410  | - |
| 5954 | 1427688_a_at | Region | Ptprs         | 19280  | 17 | 54049473  | 54095417  | - |
| 5955 | 1454950_at   | Region | B930006L02Rik | 319604 | 7  | 94813378  | 94948322  | + |
| 5956 | 1433881_at   | Region | Dnajc11       | 230935 | 4  | 150426093 | 150469046 | + |
| 5957 | 1418720_at   | Region | Cops7b        | 26895  | 1  | 86392941  | 86412324  | + |
| 5958 | 1431997_at   | Region | 3000002C10Rik | 378954 | 9  | 109851351 | 109853882 | - |
| 5959 | 1433588_at   | Region | D6Wsu116e     | 28006  | 6  | 116645592 | 116700200 | + |
| 5960 | 1452203_at   | Region | 5830411E10Rik | 109019 | 1  | 51769634  | 51779343  | - |
| 5961 | 1430064_at   | Region | 4933424A20Rik | 76860  | 2  | 35909771  | 35911703  | - |
| 5962 | 1433957_at   | Region | C030048B08Rik | 269623 | 5  | 3589987   | 3602413   | - |
| 5963 | 1433624_at   | Region | 5830434P21Rik | 227723 | 2  | 32083319  | 32166687  | + |
| 5964 | 1426975_at   | Region | 4632413K17Rik | 216440 | 10 | 126828369 | 126853844 | - |
| 5965 | 1427173_a_at | Region | Mrps33        | 14548  | 6  | 39939988  | 39949724  | - |
| 5966 | 1447991_at   | Region | Pcsk2         | 18549  | 2  | 143003115 | 143273220 | + |
| 5967 | 1444644_x_at | Region | Tatdn1        | 69694  | 15 | 58900953  | 58944887  | - |
| 5968 | 1443029_at   | Region | Ppfbp1        | 67533  | 6  | 147815628 | 147958589 | + |
| 5969 | 1421968_a_at | Region | Nipa2         | 93790  | 7  | 50201064  | 50231927  | - |
| 5970 | 1454214_a_at | Region | 2410019A14Rik | 229937 | 3  | 144551999 | 144581025 | + |
| 5971 | 1426684_at   | Region | Cnot6         | 104625 | 11 | 49427539  | 49465551  | - |
| 5972 | 1443307_at   | Region | Psmc2         | 19181  | 5  | 20237647  | 20256148  | + |
| 5973 | 1449149_at   | Region | Traf3         | 22031  | 12 | 106693201 | 106740539 | + |
| 5974 | 1457625_s_at | Region | Cdkl2         | 53886  | 5  | 91341903  | 91378846  | - |
| 5975 | 1429222_at   | Region | None          | None   | 9  | 35471054  | 35479299  | + |
| 5976 | 1454797_at   | Region | BC039161      | 219024 | 14 | 46021855  | 46025473  | - |
| 5977 | 1449069_at   | Region | Zfp148        | 22661  | 16 | 32188918  | 32308456  | + |
| 5978 | 1431694_a_at | Region | Ctnnbp1       | 67087  | 4  | 148010605 | 148059087 | + |
| 5979 | 1460631_at   | Region | Ogt           | 108155 | X  | 96241425  | 96285710  | + |
| 5980 | 1419678_at   | Region | Lats2         | 50523  | 14 | 52225857  | 52269062  | - |
| 5981 | 1416994_at   | Region | Ttc1          | 66827  | 11 | 43482843  | 43500810  | - |
| 5982 | 1429603_at   | Region | 2610110G12Rik | 73242  | 17 | 33619005  | 33629198  | - |
| 5983 | 1436865_at   | Region | Slc26a11      | 268512 | 11 | 119183742 | 119202142 | + |
| 5984 | 1449480_at   | Region | Sap18         | 20220  | 14 | 52333126  | 52339849  | + |
| 5985 | 1426478_at   | Region | Rasa1         | 218397 | 13 | 81307760  | 81348198  | - |
| 5986 | 1435878_at   | Region | Stk38l        | 232533 | 6  | 147645808 | 147699736 | + |
| 5987 | 1442157_at   | Region | A930041H05Rik | 77834  | 13 | 113302587 | 113303328 | - |
| 5988 | 1453364_x_at | Region | 9130019O22Rik | 78921  | 7  | 121431991 | 121436897 | - |
| 5989 | 1455327_at   | Region | Senp2         | 75826  | 16 | 20782192  | 20820660  | + |
| 5990 | 1426959_at   | Region | Bdh           | 71911  | 16 | 30231569  | 30266772  | + |
| 5991 | 1429100_at   | Region | 2010109K11Rik | 72123  | 12 | 28982023  | 28982836  | + |
| 5992 | 1454044_a_at | Region | Pex3          | 56535  | 10 | 13405906  | 13434917  | - |
| 5993 | 1416420_a_at | Region | Rpl9          | 20005  | 5  | 64190194  | 64192821  | - |
| 5994 | 1441656_at   | Region | B930068K11Rik | 320622 | 2  | 34270671  | 34271275  | - |
| 5995 | 1457466_at   | Region | AA409368      | 98783  | 2  | 3041906   | 3042622   | + |
| 5996 | 1440312_at   | Region | Elovl7        | 74559  | 13 | 104441513 | 104512532 | + |
| 5997 | 1460389_at   | Region | Cdk8          | 264064 | 5  | 145118521 | 145189661 | + |
| 5998 | 1451209_at   | Region | Lass5         | 71949  | 15 | 99792808  | 99829731  | - |
| 5999 | 1426106_a_at | Region | Syt6          | 54524  | 3  | 103002769 | 103058318 | + |
| 6000 | 1434283_at   | Region | Arid5b        | 71371  | 10 | 68150685  | 68334013  | - |

|      |              |        |                    |        |    |           |           |   |
|------|--------------|--------|--------------------|--------|----|-----------|-----------|---|
| 6001 | 1438277_at   | Region | E130308A19Rik      | 230259 | 4  | 59569847  | 59664423  | + |
| 6002 | 1452107_s_at | Region | Npnt               | 114249 | 3  | 131774826 | 131840439 | - |
| 6003 | 1424326_at   | Region | Lemd2              | 224640 | 17 | 24985675  | 24999666  | - |
| 6004 | 1421359_at   | Region | Ret                | 19713  | 6  | 118586419 | 118629700 | - |
| 6005 | 1422464_at   | Region | Mrpl3              | 94062  | 9  | 105034159 | 105058367 | + |
| 6006 | 1423500_a_at | Region | Sox5               | 20678  | 6  | 144679075 | 145055646 | - |
| 6007 | 1422647_at   | Region | Ring1              | 19763  | 17 | 31725138  | 31728697  | - |
| 6008 | 1450048_a_at | Region | Idh2               | 269951 | 7  | 73893703  | 73914172  | - |
| 6009 | 1418075_at   | Region | St6galnac4         | 20448  | 2  | 32519652  | 32532644  | + |
| 6010 | 1416130_at   | Region | Prnp               | 19122  | 2  | 131423810 | 131452280 | + |
| 6011 | 1438296_at   | Region | C430010C01         | 329584 | 2  | 181102960 | 181104209 | + |
| 6012 | 1453411_at   | Region | 2010110K16Rik      | 67899  | 9  | 118060948 | 118143996 | - |
| 6013 | 1433597_at   | Region | 9430010O03Rik      | 234023 | 8  | 8032433   | 8056378   | - |
| 6014 | 1433906_at   | Region | 4933402J24Rik      | 74438  | 4  | 9196508   | 9378837   | + |
| 6015 | 1418466_at   | Region | Rnf141             | 67150  | 7  | 104668395 | 104697253 | - |
| 6016 | 1419385_a_at | Region | Ubqln1             | 56085  | 13 | 56804764  | 56844390  | - |
| 6017 | 1423688_at   | Region | Man2c1             | 73744  | 9  | 57244266  | 57255699  | + |
| 6018 | 1444651_at   | Region | Map2k4             | 26398  | 11 | 65413894  | 65513947  | - |
| 6019 | 1455687_at   | Region | Ick                | 56542  | 9  | 78282435  | 78336986  | + |
| 6020 | 1439799_at   | Region | None               | None   | 17 | 61196370  | 61197292  | + |
| 6021 | 1423104_at   | Region | Irs1               | 16367  | 1  | 82571724  | 82626530  | - |
| 6022 | 1426271_at   | Region | Smc5l1             | 226026 | 19 | 22446187  | 22511419  | - |
| 6023 | 1454161_s_at | Region | 0610007P14Rik      | 58520  | 12 | 82685029  | 82694208  | - |
| 6024 | 1443735_at   | Region | None               | None   | 13 | 60121869  | 60241129  | + |
| 6025 | 1450641_at   | Region | Vim                | 22352  | 2  | 13489961  | 13498816  | + |
| 6026 | 1443585_at   | Region | Zfp526             | 210172 | 7  | 20401813  | 20408380  | + |
| 6027 | 1447326_s_at | Region | Zfp261             | 56364  | X  | 96005746  | 96022210  | - |
| 6028 | 1422499_at   | Region | D15ErtD366e        | 65970  | 15 | 99835724  | 99877288  | - |
| 6029 | 1430554_at   | Region | Lrig3              | 320398 | 10 | 125665572 | 125714849 | + |
| 6030 | 1433911_at   | Region | Al317223           | 103677 | 11 | 74651530  | 74890106  | + |
| 6031 | 1421322_a_at | Region | Isgf3g             | 16391  | 14 | 50122590  | 50128041  | + |
| 6032 | 1418007_at   | Region | 1810007M14Rik      | 67367  | 16 | 90171076  | 90201546  | - |
| 6033 | 1423144_at   | Region | Pik3ca             | 18706  | 3  | 31844384  | 31871009  | + |
| 6034 | 1437017_at   | Region | Al480653           | 268880 | 16 | 29764506  | 29890256  | - |
| 6035 | 1453666_at   | Region | Rnf32              | 56874  | 5  | 27646557  | 27676001  | + |
| 6036 | 1423306_at   | Region | 2010002N04Rik      | 106878 | 18 | 60699517  | 60726851  | - |
| 6037 | 1457438_at   | Region | None               | None   | 4  | 11050923  | 11053963  | + |
| 6038 | 1447209_at   | Region | Foxp1              | 108655 | 6  | 99395348  | 99630926  | - |
| 6039 | 1424371_at   | Region | Psmf1              | 228769 | 2  | 151172998 | 151198229 | - |
| 6040 | 1442151_at   | Region | None               | None   | 13 | 13510425  | 13511430  | + |
| 6041 | 1435403_at   | Region | ---                | 385627 | 16 | 32181350  | 32188822  | - |
| 6042 | 1442586_at   | Region | D130043N08Rik      | 103250 | 10 | 95384895  | 95385568  | - |
| 6043 | 1453293_a_at | Region | 2810408A11Rik      | 70419  | 11 | 69623016  | 69626644  | - |
| 6044 | 1421083_x_at | Region | Banf1              | 23825  | 19 | 5153430   | 5155435   | - |
| 6045 | 1416896_at   | Region | Rps6ka1            | 20111  | 4  | 132808193 | 132848683 | - |
| 6046 | 1449648_s_at | Region | Rpo1-1             | 20016  | 17 | 43753849  | 43757884  | - |
| 6047 | 1451368_at   | Region | Alg1 /// LOC547231 | 208211 | 16 | 4903299   | 4914559   | + |
| 6048 | 1450700_at   | Region | Cdc42ep3           | 260409 | 17 | 77155449  | 77176516  | - |
| 6049 | 1416459_at   | Region | Arf2               | 11841  | 11 | 103787960 | 103806425 | + |
| 6050 | 1426469_a_at | Region | Tbp                | 21374  | 17 | 13506727  | 13520435  | + |
| 6051 | 1434213_x_at | Region | Ndufs8             | 225887 | 19 | 3697661   | 3701550   | - |
| 6052 | 1416747_at   | Region | D15Mgi27           | 106073 | 15 | 102339753 | 102342043 | + |
| 6053 | 1453932_at   | Region | 4931433A01Rik      | 78933  | 4  | 109356566 | 109621875 | + |
| 6054 | 1437776_at   | Region | 3632431M01Rik      | 330401 | 6  | 116456153 | 116631023 | - |
| 6055 | 1440243_at   | Region | Cpne7              | 102278 | 8  | 122498738 | 122516463 | + |
| 6056 | 1447409_at   | Region | Chd7               | 320790 | 4  | 8617703   | 8793952   | + |
| 6057 | 1425674_a_at | Region | Ssu72              | 68991  | 4  | 154197486 | 154226144 | + |
| 6058 | 1424175_at   | Region | Tef                | 21685  | 15 | 81853534  | 81877580  | + |
| 6059 | 1416173_at   | Region | Pes1               | 64934  | 11 | 3858762   | 3874791   | + |
| 6060 | 1449041_a_at | Region | Trip6              | 22051  | 5  | 136260765 | 136265107 | - |
| 6061 | 1437650_at   | Region | C730026J16         | 331006 | 9  | 96582585  | 96584688  | - |
| 6062 | 1454664_a_at | Region | Eif5               | 217869 | 12 | 107012763 | 107017765 | + |
| 6063 | 1448396_at   | Region | D1Bwg0491e         | 56030  | 1  | 37086785  | 37233778  | - |
| 6064 | 1421867_at   | Region | Nr3c1              | 14815  | 18 | 39638075  | 39711047  | - |



|      |              |        |                     |        |    |           |           |   |
|------|--------------|--------|---------------------|--------|----|-----------|-----------|---|
| 6065 | 1459670_at   | Region | Hnrpl1              | 72692  | 17 | 77846881  | 77879599  | - |
| 6066 | 1417458_s_at | Region | Cks2                | 66197  | 13 | 50199009  | 50204338  | + |
| 6067 | 1438400_at   | Region | 4632411B12Rik       | 226976 | 1  | 36630324  | 36663775  | - |
| 6068 | 1430597_at   | Region | MGI:1923321         | 76071  | 5  | 35557428  | 35631807  | + |
| 6069 | 1442732_at   | Region | Hadhb               | 231086 | 5  | 28621184  | 28642098  | + |
| 6070 | 1417054_a_at | Region | 0610009D07Rik       | 66055  | 12 | 3985835   | 3999611   | + |
| 6071 | 1435806_at   | Region | D530033C11Rik       | 78581  | 15 | 51874725  | 51881202  | + |
| 6072 | 1428258_at   | Region | 2010107E04Rik       | 70257  | 12 | 107440675 | 107446276 | + |
| 6073 | 1429438_at   | Region | Bcor                | 71458  | X  | 10276230  | 10318808  | - |
| 6074 | 1436486_x_at | Region | Whrn                | 73750  | 4  | 62506101  | 62587142  | - |
| 6075 | 1431827_a_at | Region | Tlk2                | 24086  | 11 | 104998272 | 105103265 | + |
| 6076 | 1417221_at   | Region | Ppm1a               | 19042  | 12 | 69630561  | 69641441  | + |
| 6077 | 1452100_at   | Region | Dullard             | 67181  | 11 | 69706826  | 69716259  | + |
|      |              |        | H2-BI ///           |        |    |           |           |   |
| 6078 | 1447260_at   | Region | LOC547349           | 14963  | 17 | 115       | 1182      | - |
| 6079 | 1457272_at   | Region | None                | None   | 18 | 73869019  | 73870225  | - |
| 6080 | 1416115_at   | Region | Orc3l               | 50793  | 4  | 34708370  | 34754011  | - |
| 6081 | 1422671_s_at | Region | Naalad2             | 72560  | 9  | 18164010  | 18226920  | - |
| 6082 | 1442740_at   | Region | Prdm5               | 70779  | 6  | 66036866  | 66194195  | + |
| 6083 | 1417771_a_at | Region | Psmc6               | 67089  | 14 | 862       | 12455     | - |
| 6084 | 1436113_a_at | Region | St13                | 70356  | 15 | 81415844  | 81450494  | - |
| 6085 | 1434680_at   | Region | Plekhh3             | 263406 | 12 | 73390267  | 73424857  | + |
| 6086 | 1423084_at   | Region | B3galt2             | 26878  | 1  | 143472806 | 143481893 | + |
| 6087 | 1443583_at   | Region | C030010B13Rik       | 77310  | 2  | 173046327 | 173120005 | - |
| 6088 | 1425671_at   | Region | Homer1              | 26556  | 13 | 89489518  | 89588558  | + |
| 6089 | 1428061_at   | Region | Hat1                | 107435 | 2  | 71087000  | 71139365  | + |
| 6090 | 1426715_s_at | Region | D11ErtD18e          | 52466  | 11 | 78191377  | 78197589  | + |
| 6091 | 1455020_at   | Region | Snx25               | 102141 | 8  | 44973816  | 44987988  | - |
| 6092 | 1431828_a_at | Region | Synj2               | 20975  | 17 | 5881998   | 5950653   | + |
| 6093 | 1432083_a_at | Region | Lrpb7               | 16977  | 6  | 125426629 | 125436487 | - |
| 6094 | 1457802_at   | Region | B930012P20Rik       | 320140 | 3  | 78960491  | 78961026  | - |
| 6095 | 1419508_at   | Region | Ripk1               | 19766  | 13 | 33537383  | 33569679  | + |
|      |              |        |                     |        |    |           |           |   |
| 6096 | 1440932_at   | Region | Trim17 /// Hist3h2a | 319162 | 11 | 58680314  | 58682303  | + |
| 6097 | 1425661_at   | Region | Cdadcl1             | 71891  | 14 | 54094451  | 54133002  | - |
| 6098 | 1442918_at   | Region | Nav3                | 260315 | 10 | 109569106 | 109718861 | - |
| 6099 | 1451846_at   | Region | Nebi                | 74103  | 2  | 17388744  | 17773079  | - |
| 6100 | 1420616_at   | Region | Ash2l               | 23808  | 8  | 24541624  | 24565518  | - |
| 6101 | 1428918_at   | Region | Scyl3               | 240880 | 1  | 163847656 | 163872719 | + |
| 6102 | 1452037_at   | Region | Mgat2               | 217664 | 12 | 66016002  | 66018036  | + |
| 6103 | 1437382_at   | Region | Acvr2a              | 11480  | 2  | 48746319  | 48834325  | + |
| 6104 | 1426383_at   | Region | Cry2                | 12953  | 2  | 92108329  | 92138711  | - |
| 6105 | 1419027_s_at | Region | MGI:1929253         | 56356  | 5  | 113779116 | 113800561 | - |
| 6106 | 1436991_x_at | Region | Gsn                 | 227753 | 2  | 35214602  | 35240054  | + |
| 6107 | 1434656_at   | Region | B230339M05Rik       | 228850 | 2  | 157887219 | 157956217 | + |
| 6108 | 1437204_a_at | Region | None                | None   | 8  | 122775522 | 122778505 | + |
| 6109 | 1427122_at   | Region | Copg2as2            | 54158  | 6  | 30846849  | 30849105  | + |
| 6110 | 1453457_at   | Region | 2900070H08Rik       | 73025  | 5  | 8069682   | 8070888   | + |
| 6111 | 1423674_at   | Region | Usp1                | 230484 | 4  | 97898883  | 97910606  | + |
| 6112 | 1451003_at   | Region | Map3k7ip2           | 68652  | 10 | 7771623   | 7790347   | - |
| 6113 | 1421910_at   | Region | Tcf20               | 21411  | 15 | 82860358  | 82962283  | - |
| 6114 | 1417112_at   | Region | Arl2bp              | 107566 | 8  | 93950927  | 93958594  | + |
| 6115 | 1434591_at   | Region | 4732460K03Rik       | 58894  | 6  | 48666616  | 48667711  | + |
| 6116 | 1434160_at   | Region | Zfp592              | 233410 | 7  | 74796384  | 74845397  | + |
| 6117 | 1418032_at   | Region | 2700050P07Rik       | 101142 | 6  | 129099631 | 129115097 | - |
| 6118 | 1425202_a_at | Region | Ank3                | 11735  | 10 | 69589190  | 70079102  | + |
| 6119 | 1451051_a_at | Region | Scyl1               | 78891  | 19 | 5547217   | 5560191   | - |
| 6120 | 1418469_at   | Region | Nrip1               | 268903 | 16 | 75376752  | 75458939  | - |
| 6121 | 1454801_at   | Region | Ankrd28             | 105522 | 14 | 29830803  | 29831990  | - |
| 6122 | 1442016_at   | Region | D630004N19Rik       | 402747 | 7  | 94652424  | 94654296  | - |
| 6123 | 1435652_a_at | Region | Gnai2               | 14678  | 9  | 107680276 | 107701110 | - |
| 6124 | 1456526_at   | Region | C130034I24Rik       | 320794 | 2  | 91458928  | 91459645  | + |
| 6125 | 1441592_at   | Region | None                | None   | 10 | 67169992  | 67170493  | + |
| 6126 | 1436537_at   | Region | Zfp629              | 320683 | 7  | 121656766 | 121664164 | - |
| 6127 | 1444071_at   | Region | 9630013A20Rik       | 319903 | 14 | 78818360  | 78835088  | - |

|      |              |        |               |        |    |           |           |   |
|------|--------------|--------|---------------|--------|----|-----------|-----------|---|
| 6128 | 1422514_at   | Region | Aebp1         | 11568  | 11 | 5756734   | 5766837   | + |
| 6129 | 1420913_at   | Region | Slco2a1       | 24059  | 9  | 102980160 | 103058431 | + |
| 6130 | 1447056_at   | Region | Slit2         | 20563  | 5  | 46748038  | 47069334  | + |
| 6131 | 1422048_at   | Region | Trpc5         | 22067  | X  | 137821717 | 138128226 | - |
| 6132 | 1451026_at   | Region | Ftsj3         | 56095  | 11 | 106070233 | 106076891 | - |
| 6133 | 1424575_at   | Region | Rabl5         | 67286  | 5  | 135921272 | 135926366 | + |
| 6134 | 1428210_s_at | Region | Chuk          | 12675  | 19 | 43617742  | 43651851  | - |
| 6135 | 1429593_at   | Region | Slc38a2       | 67760  | 15 | 96755014  | 96767320  | - |
| 6136 | 1436454_x_at | Region | Fen1          | 14156  | 19 | 9395636   | 9400440   | - |
| 6137 | 1425383_a_at | Region | Pbx1          | 18514  | 1  | 168054563 | 168366387 | - |
| 6138 | 1415970_at   | Region | Cox6c         | 12864  | 15 | 35933506  | 35939687  | - |
| 6139 | 1440357_at   | Region | None          | None   | 15 | 85755490  | 85756167  | + |
| 6140 | 1439895_at   | Region | AU021025      | 105285 | 13 | 110400275 | 110401249 | + |
| 6141 | 1443138_at   | Region | Sult5a1       | 57429  | 8  | 122524128 | 122539554 | - |
| 6142 | 1442692_at   | Region | Mapkap1       | 227743 | 2  | 34339345  | 34556075  | + |
| 6143 | 1455036_s_at | Region | Ndufc2        | 68197  | 7  | 91446361  | 91454068  | + |
| 6144 | 1417209_at   | Region | Sertad2       | 58172  | 11 | 20438127  | 20543916  | + |
| 6145 | 1441538_at   | Region | Dpp6          | 13483  | 5  | 25258284  | 26167391  | + |
| 6146 | 1453105_at   | Region | Zfp263        | 74120  | 16 | 3415695   | 3422348   | + |
| 6147 | 1423634_at   | Region | Gsdm1         | 57911  | 11 | 98485438  | 98498795  | + |
| 6148 | 1437638_at   | Region | Srrm2         | 75956  | 17 | 21605406  | 21626916  | + |
| 6149 | 1436396_at   | Region | D430033N04Rik | 217935 | 12 | 112002973 | 112026119 | - |
| 6150 | 1430841_at   | Region | 3300002P13Rik | 70230  |    | 65522618  | 65523551  | + |
| 6151 | 1424106_at   | Region | 1200003C05Rik | 104771 | 12 | 68925221  | 68939959  | + |
| 6152 | 1417253_at   | Region | Frg1          | 14300  | 8  | 40335099  | 40354883  | - |
| 6153 | 1435046_at   | Region | Myo1d         | 338367 | 11 | 80309486  | 80505684  | - |
| 6154 | 1433476_at   | Region | C78339        | 97863  | 13 | 46253320  | 46273975  | + |
| 6155 | 1417812_a_at | Region | Lamb3         | 16780  | 1  | 193040798 | 193082646 | + |
| 6156 | 1441356_at   | Region | Shc2          | 216148 | 10 | 79740620  | 79759030  | - |
| 6157 | 1417733_at   | Region | Rnf146        | 68031  | 10 | 29378124  | 29394428  | - |
| 6158 | 1429031_at   | Region | 4833408D11Rik | 73789  | 7  | 23213413  | 23214291  | + |
| 6159 | 1435261_at   | Region | 4732416N19Rik | 320737 | 6  | 149166254 | 149169251 | - |
| 6160 | 1436305_at   | Region | LOC268291     | 268291 | 10 | 31542086  | 31649384  | - |
| 6161 | 1421750_a_at | Region | Vbp1          | 22327  | X  | 70175004  | 70195547  | + |
| 6162 | 1418884_x_at | Region | Tuba1         | 22142  | 15 | 99007626  | 99011282  | - |
| 6163 | 1417384_at   | Region | Entpd5        | 12499  | 12 | 81245023  | 81273816  | - |
| 6164 | 1450673_at   | Region | Col9a2        | 12840  | 4  | 120061776 | 120077745 | + |
| 6165 | 1449445_x_at | Region | Mfap1         | 67532  | 2  | 121007192 | 121020508 | - |
| 6166 | 1451455_at   | Region | BC051244      | 232078 | 6  | 71460328  | 71476268  | - |
| 6167 | 1437144_x_at | Region | Psma6         | 26443  | 12 | 52119691  | 52139243  | + |
| 6168 | 1423558_at   | Region | Ifngr2        | 15980  | 16 | 90704258  | 90721171  | + |
| 6169 | 1440966_at   | Region | 38418         | 57438  | 2  | 60065336  | 60103785  | + |
| 6170 | 1418292_at   | Region | Asna1         | 56495  | 8  | 84288403  | 84295917  | - |
| 6171 | 1443885_at   | Region | None          | None   | 7  | 20265238  | 20266112  | - |
| 6172 | 1427478_at   | Region | Usp12         | 22217  | 5  | 145626505 | 145686649 | - |
| 6173 | 1450897_at   | Region | Arhgap5       | 11855  | 12 | 49267090  | 49318371  | + |
| 6174 | 1437987_at   | Region | None          | None   | 12 | 49322710  | 49323013  | + |
| 6175 | 1432144_a_at | Region | Rchy1         | 68098  | 5  | 91284732  | 91298896  | - |
| 6176 | 1451550_at   | Region | Ephb3         | 13845  | 16 | 19975855  | 19994364  | + |
| 6177 | 1420561_at   | Region | Trpc7         | 26946  | 13 | 55393457  | 55515937  | - |
| 6178 | 1453097_a_at | Region | Ubtf          | 21429  | 11 | 102127078 | 102137561 | - |
| 6179 | 1425142_a_at | Region | Hnrpd         | 11991  | 5  | 98979646  | 98997188  | - |
| 6180 | 1428763_at   | Region | Smug1         | 71726  | 15 | 103215352 | 103225303 | - |
| 6181 | 1426850_a_at | Region | Map2k6        | 26399  | 11 | 110220211 | 110334726 | + |
| 6182 | 1448947_at   | Region | 0610039J04Rik | 66523  | 8  | 124126680 | 124150314 | - |
| 6183 | 1422597_at   | Region | Mmp15         | 17388  | 8  | 94636817  | 94655679  | + |
| 6184 | 1448204_at   | Region | Sav1          | 64010  | 12 | 66797137  | 66819163  | - |
| 6185 | 1446548_at   | Region | Gltscr1       | 276711 | 7  | 21882524  | 21883153  | - |
| 6186 | 1448435_at   | Region | Pcqap         | 94112  | 16 | 16422190  | 16493791  | - |
| 6187 | 1430889_a_at | Region | Trpmt         | 22017  | 13 | 46623326  | 46641352  | - |
| 6188 | 1443161_at   | Region | Trps1         | 83925  | 15 | 50659276  | 50888038  | - |
| 6189 | 1451253_at   | Region | Pxk           | 218699 | 14 | 5766471   | 5833846   | + |
| 6190 | 1418343_at   | Region | Gtf2ird2      | 114674 | 5  | 133475414 | 133509522 | + |
| 6191 | 1452704_at   | Region | 1200015F23Rik | 67809  | 2  | 118650852 | 118681688 | - |
| 6192 | 1419066_at   | Region | Ier5l         | 72500  | 2  | 30403700  | 30406381  | - |

|      |              |        |               |        |    |           |           |   |
|------|--------------|--------|---------------|--------|----|-----------|-----------|---|
| 6193 | 1417871_at   | Region | Hsd17b7       | 15490  | 1  | 169883718 | 169903346 | - |
| 6194 | 1449339_at   | Region | D10ErtD641e   | 52717  | 10 | 59943553  | 59958756  | - |
| 6195 | 1451081_a_at | Region | D8ErtD325e    | 66855  | 8  | 122748919 | 122778703 | + |
| 6196 | 1433822_x_at | Region | Anapc5        | 59008  | 5  | 121940636 | 121974194 | - |
| 6197 | 1428031_at   | Region | Gpr24         | 207911 | 15 | 81286574  | 81288912  | + |
| 6198 | 1448376_at   | Region | Wrnip1        | 78903  | 13 | 32281660  | 32302231  | + |
| 6199 | 1443244_at   | Region | Zadh1         | 77219  | 12 | 81153770  | 81182471  | + |
| 6200 | 1435560_at   | Region | None          | None   | 7  | 121383509 | 121384867 | + |
| 6201 | 1455483_at   | Region | Zfp148        | 22661  | 16 | 32188918  | 32308456  | + |
| 6202 | 1416274_at   | Region | Ctns          | 83429  | 11 | 72908791  | 72924677  | - |
| 6203 | 1438236_at   | Region | Nfia          | 18027  | 4  | 96752972  | 97087465  | + |
| 6204 | 1424698_s_at | Region | Gca           | 227960 | 2  | 62519727  | 62549509  | + |
| 6205 | 1437871_at   | Region | Pgm5          | 226041 | 19 | 24056158  | 24101717  | - |
| 6206 | 1443947_at   | Region | Lims1         | 110829 | 10 | 58281059  | 58380568  | + |
| 6207 | 1428429_at   | Region | Rgmb          | 68799  | 17 | 13809790  | 13830123  | - |
| 6208 | 1452297_at   | Region | Cnt2          | 72949  | 1  | 127616552 | 127647225 | + |
| 6209 | 1433830_at   | Region | Hnrpa2b1      | 53379  | 6  | 51608402  | 51617123  | - |
| 6210 | 1423491_at   | Region | Fbxo3         | 57443  | 2  | 103732553 | 103767991 | + |
| 6211 | 1451123_at   | Region | C330016O10Rik | 212706 | 11 | 51395930  | 51403914  | - |
| 6212 | 1456061_at   | Region | Gimap8        | 243374 | 6  | 48780240  | 48793754  | + |
| 6213 | 1458984_at   | Region | None          | None   | 4  | 59672321  | 59672899  | + |
| 6214 | 1428401_at   | Region | Zcchc3        | 67917  | 2  | 151869891 | 151871963 | - |
| 6215 | 1450506_a_at | Region | lsg2011       | 68048  | 7  | 72688034  | 72700940  | + |
| 6216 | 1417293_at   | Region | Hs6st1        | 50785  | 1  | 36359851  | 36397843  | + |
| 6217 | 1459667_at   | Region | Arhgap17      | 70497  | 7  | 117335650 | 117426263 | - |
| 6218 | 1429039_s_at | Region | 1500034J01Rik | 66498  | 8  | 70619056  | 70625966  | + |
| 6219 | 1425021_a_at | Region | Pex16         | 18633  | 2  | 92080181  | 92085900  | + |
| 6220 | 1443017_at   | Region | Cpeb2         | 231207 | 5  | 41990144  | 42042375  | + |
| 6221 | 1418204_s_at | Region | Aif1          | 11629  | 17 | 32874698  | 32879734  | - |
| 6222 | 1426504_a_at | Region | Rnf121        | 75212  | 7  | 96126119  | 96178400  | - |
| 6223 | 1417157_at   | Region | Actr10        | 56444  | 12 | 67772900  | 67797290  | + |
| 6224 | 1424834_s_at | Region | ltp2          | 16439  | 6  | 147342110 | 147422837 | - |
| 6225 | 1455403_at   | Region | Manea         | 242362 | 4  | 26460019  | 26482165  | - |
| 6226 | 1431118_at   | Region | 6720427H10Rik | 77884  | 13 | 110389021 | 110390636 | + |
| 6227 | 1448152_at   | Region | Igf2          | 16002  | 7  | 137063787 | 137074879 | - |
| 6228 | 1430251_at   | Region | D330022H12Rik | 77095  | 16 | 4264424   | 4265735   | - |
| 6229 | 1431236_at   | Region | Stk32b        | 64293  | 5  | 35953339  | 36223576  | - |
| 6230 | 1426464_at   | Region | Nr1d1         | 217166 | 11 | 98589019  | 98595909  | - |
| 6231 | 1435944_s_at | Region | Cenpb         | 12616  | 2  | 130691142 | 130693865 | - |
| 6232 | 1448607_at   | Region | Pbef1         | 59027  | 12 | 29426677  | 29457809  | + |
| 6233 | 1442265_at   | Region | Fancc         | 14088  | 13 | 60694745  | 60814715  | - |
| 6234 | 1417478_a_at | Region | 4930511A21Rik | 59032  | 12 | 51935442  | 52023946  | - |
| 6235 | 1426781_at   | Region | Rsafd1        | 100929 | 5  | 129432846 | 129455440 | + |
| 6236 | 1448138_at   | Region | Ppp2r4        | 110854 | 2  | 30348212  | 30379966  | + |
| 6237 | 1422767_at   | Region | Bysl          | 53414  | 17 | 45118540  | 45129944  | - |
| 6238 | 1418109_at   | Region | Gspt2         | 14853  | X  | 89296727  | 89299220  | + |
| 6239 | 1453983_a_at | Region | 2810013M15Rik | 67493  | 11 | 74496521  | 74544350  | + |
| 6240 | 1456010_x_at | Region | Hes5          | 15208  | 4  | 153453285 | 153454733 | + |
| 6241 | 1450426_at   | Region | Chrna6        | 11440  | 8  | 26172766  | 26183611  | - |
| 6242 | 1422437_at   | Region | Col5a2        | 12832  | 1  | 45679868  | 45806698  | - |
| 6243 | 1449135_at   | Region | Sox18         | 20672  | 2  | 181386799 | 181388565 | - |
| 6244 | 1435905_at   | Region | D3ErtD300e    | 56790  | 3  | 54327325  | 54351057  | + |
| 6245 | 1433266_at   | Region | 2810416A17Rik | 70241  | 14 | 94465299  | 94466451  | - |
| 6246 | 1421896_at   | Region | Elk1          | 13712  | X  | 19173867  | 19189533  | - |
| 6247 | 1419300_at   | Region | Flt1          | 14254  | 5  | 146453691 | 146617483 | - |
| 6248 | 1422890_at   | Region | Pcdh18        | 73173  | 3  | 49331829  | 49346004  | - |
| 6249 | 1424780_a_at | Region | D10Ucla1      | 28193  | 10 | 67048137  | 67134030  | - |
| 6250 | 1451180_a_at | Region | C330027I04Rik | 68106  | 11 | 100243408 | 100262161 | - |
| 6251 | 1436304_at   | Region | C030003D03Rik | 77220  | 10 | 25982477  | 26078288  | - |
| 6252 | 1433520_at   | Region | Scap          | 235623 | 9  | 110373444 | 110426587 | + |
| 6253 | 1460549_a_at | Region | Cdc23         | 52563  | 18 | 34854705  | 34874773  | - |
| 6254 | 1433846_s_at | Region | C430003P19Rik | 109359 | 7  | 127237961 | 127251442 | + |
| 6255 | 1460547_a_at | Region | Hnrpk         | 15387  | 13 | 57024107  | 57034672  | - |
| 6256 | 1457651_x_at | Region | Rem2          | 140743 | 14 | 48993511  | 48997845  | + |
| 6257 | 1426688_at   | Region | Sdha          | 66945  | 13 | 70384460  | 70412084  | - |

|      |              |        |                   |        |    |           |           |   |
|------|--------------|--------|-------------------|--------|----|-----------|-----------|---|
| 6258 | 1437136_at   | Region | 5830436I19Rik     | 319946 | 17 | 45048588  | 45049456  | + |
| 6259 | 1417403_at   | Region | Elovl6            | 170439 | 3  | 128465310 | 128571362 | + |
| 6260 | 1448679_at   | Region | Hyal2             | 15587  | 9  | 107634944 | 107638559 | + |
| 6261 | 1452507_at   | Region | Dlx6              | 13396  | 6  | 6836503   | 6840727   | + |
| 6262 | 1424263_at   | Region | 2810003C17Rik     | 108897 | 2  | 31882465  | 31905604  | + |
| 6263 | 1426895_at   | Region | Zfp191            | 59057  | 18 | 24240763  | 24249267  | - |
| 6264 | 1435464_at   | Region | 1110003E01Rik     | 68552  | 5  | 64251633  | 64294659  | - |
| 6265 | 1425030_at   | Region | Zfp622            | 52521  | 15 | 25973256  | 25987372  | + |
| 6266 | 1460209_at   | Region | Usp39             | 28035  | 6  | 72650650  | 72677149  | - |
| 6267 | 1426529_a_at | Region | Tagln2            | 21346  | 1  | 172429183 | 172436299 | + |
| 6268 | 1416316_at   | Region | Slc27a2           | 26458  | 2  | 126067008 | 126101789 | + |
| 6269 | 1420038_at   | Region | Atp6v1e1          | 11973  | 6  | 121227218 | 121254659 | - |
| 6270 | 1424648_at   | Region | Rabl4             | 67042  | 15 | 78211456  | 78226101  | - |
| 6271 | 1439173_at   | Region | Hook1             | 77963  | 4  | 94942452  | 94999350  | + |
| 6272 | 1424251_a_at | Region | Hnrpd1            | 50926  | 5  | 99053360  | 99057516  | - |
| 6273 | 1428314_at   | Region | Pcnp              | 328694 | 16 | 54911436  | 54920579  | - |
| 6274 | 1448820_a_at | Region | Eif2s2            | 67204  | 2  | 154328353 | 154349719 | - |
| 6275 | 1442625_at   | Region | None              | None   | 14 | 40604571  | 40605076  | - |
| 6276 | 1437200_at   | Region | Fcho2             | 218503 | 13 | 94911844  | 95003580  | - |
| 6277 | 1440519_at   | Region | Sp8               | 320145 | 12 | 114659034 | 114664054 | + |
| 6278 | 1429124_s_at | Region | Tceb3bp1          | 66932  | 10 | 80672809  | 80692760  | - |
| 6279 | 1440481_at   | Region | None              | None   | 1  | 52422237  | 52423203  | + |
| 6280 | 1440566_at   | Region | D330005C11Rik     | 319398 | 5  | 141117468 | 141118174 | + |
| 6281 | 1451459_at   | Region | Ahctf1            | 226747 | 1  | 179700337 | 179757911 | - |
| 6282 | 1450072_at   | Region | Ash1l             | 192195 | 3  | 88709675  | 88822741  | + |
| 6283 | 1425141_at   | Region | None              | None   | 1  | 13758085  | 13793589  | - |
| 6284 | 1452917_at   | Region | Rfc5              | 72151  | 4  | 116507926 | 116517824 | - |
| 6285 | 1418117_at   | Region | Ndufs4            | 17993  | 13 | 110702711 | 110802452 | - |
| 6286 | 1452999_at   | Region | Smndc1            | 76479  | 19 | 52947147  | 52958506  | - |
| 6287 | 1420828_s_at | Region | Ywhaq             | 22630  | 12 | 18728420  | 18754333  | + |
| 6288 | 1433730_at   | Region | Elmod2            | 244548 | 8  | 82560189  | 82579982  | - |
| 6289 | 1429110_a_at | Region | 2810405F18Rik     | 72181  | 4  | 114991747 | 115012781 | - |
| 6290 | 1418201_at   | Region | Plekhg2           | 101497 | 7  | 23762000  | 23774164  | - |
| 6291 | 1426360_at   | Region | Zc3h11a           | 70579  | 1  | 133482838 | 133516350 | - |
| 6292 | 1448831_at   | Region | Angpt2            | 11601  | 8  | 18636337  | 18686551  | - |
| 6293 | 1436202_at   | Region | 9430072K23Rik     | 77292  | 19 | 5584481   | 5586545   | - |
| 6294 | 1460678_at   | Region | Klhdc2            | 69554  | 12 | 66128557  | 66142253  | + |
| 6295 | 1437003_at   | Region | None              | None   | 8  | 106316713 | 106317403 | + |
| 6296 | 1451191_at   | Region | Crabp2            | 12904  | 3  | 87692354  | 87697104  | + |
| 6297 | 1454390_at   | Region | Lrch4             | 231798 | 5  | 136579783 | 136591102 | + |
| 6298 | 1439051_a_at | Region | Mark4             | 232944 | 7  | 16295319  | 16327738  | - |
| 6299 | 1458182_at   | Region | Rbm18             | 67889  | 2  | 36048243  | 36068773  | - |
| 6300 | 1442525_at   | Region | 2610204L23Rik     | 67163  | 11 | 106021555 | 106037392 | - |
| 6301 | 1422539_at   | Region | Extl2             | 58193  | 3  | 114777993 | 114799388 | + |
| 6302 | 1460577_at   | Region | AA591059          | 105098 | 13 | 89614530  | 89615176  | - |
| 6303 | 1444065_at   | Region | 9330151E16Rik     | 192986 | 11 | 72520694  | 72521700  | - |
| 6304 | 1422793_at   | Region | Pafah1b2          | 18475  | 9  | 45981441  | 45998071  | - |
| 6305 | 1434003_a_at | Region | Dhps              | 330817 | 8  | 84342639  | 84345999  | + |
| 6306 | 1440095_at   | Region | None              | None   | 7  | 124625642 | 124626112 | - |
| 6307 | 1426716_at   | Region | Tdrd7             | 100121 | 4  | 45903384  | 45950683  | + |
| 6308 | 1445787_at   | Region | 5033413D22Rik     | 75973  | 10 | 41640673  | 41689577  | - |
| 6309 | 1454784_at   | Region | Hs3st2            | 195646 | 7  | 115360837 | 115377332 | + |
| 6310 | 1425623_a_at | Region | Cbs               | 12411  | 17 | 29420528  | 29445025  | - |
|      |              |        | Amd1 /// Amd2 /// |        |    |           |           |   |
| 6311 | 1416835_s_at | Region | LOC432454         | 11702  | 10 | 40363437  | 40378151  | - |
| 6312 | 1424316_at   | Region | Slc25a19          | 67283  | 11 | 115436076 | 115449232 | - |
| 6313 | 1428090_at   | Region | 2810422B04Rik     | 69956  | 6  | 72212611  | 72240739  | - |
| 6314 | 1456128_at   | Region | Atp5g2            | 67942  | 15 | 102723287 | 102731466 | - |
| 6315 | 1458140_at   | Region | Slit2             | 20563  | 5  | 46748038  | 47069334  | + |
| 6316 | 1429554_at   | Region | Sdccag3           | 68112  | 2  | 26315523  | 26321468  | - |
| 6317 | 1457432_at   | Region | Prox1             | 19130  | 1  | 189836615 | 189885751 | - |
| 6318 | 1417937_at   | Region | Dact1             | 59036  | 12 | 68146768  | 68155678  | + |
| 6319 | 1458379_at   | Region | 9330159F19Rik     | 212448 | 10 | 29242835  | 29259565  | + |
| 6320 | 1416731_at   | Region | Top2b             | 21974  | 14 | 14861822  | 14927407  | + |
| 6321 | 1438164_x_at | Region | Flot2             | 14252  | 11 | 77765963  | 77786091  | + |

|      |              |        |                 |        |    |           |           |   |
|------|--------------|--------|-----------------|--------|----|-----------|-----------|---|
| 6322 | 1449184_at   | Region | Pglyrp1         | 21946  | 7  | 15754519  | 15760353  | + |
| 6323 | 1444386_at   | Region | Pde1c           | 18575  | 6  | 56226106  | 56506844  | - |
| 6324 | 1424658_at   | Region | Taok1           | 216965 | 11 | 77255718  | 77311108  | - |
| 6325 | 1460358_s_at | Region | Nudt22          | 68323  | 19 | 6706867   | 6709885   | - |
| 6326 | 1419030_at   | Region | Ero1l           | 50527  | 14 | 950       | 11169     | + |
| 6327 | 1417953_at   | Region | D6Wsu176e       | 27999  | 6  | 22353558  | 22403117  | - |
| 6328 | 1439877_at   | Region | Ext1            | 14042  | 15 | 53068219  | 53345629  | - |
| 6329 | 1447062_at   | Region | Vps24           | 66700  | 6  | 71875831  | 71913551  | + |
|      |              |        | Zfp71-rs1 ///   |        |    |           |           |   |
| 6330 | 1424752_x_at | Region | 6720487G11Rik   | 235907 | 13 | 1294      | 6997      | - |
| 6331 | 1421754_at   | Region | AY036118        | 170798 |    | 14927945  | 14929071  | + |
| 6332 | 1449940_a_at | Region | Eif2b4          | 13667  | 5  | 29646506  | 29652031  | - |
| 6333 | 1442924_at   | Region | Clstn2          | 64085  | 9  | 97343753  | 97483061  | - |
| 6334 | 1434918_at   | Region | Sox6            | 20679  | 7  | 109336962 | 109662307 | - |
| 6335 | 1437113_s_at | Region | Pld1            | 18805  | 3  | 27441540  | 27550616  | + |
| 6336 | 1416536_at   | Region | Mum1            | 68114  | 10 | 80353235  | 80368810  | + |
| 6337 | 1436053_at   | Region | Tbc1d22b        | 381085 | 17 | 27359185  | 27416188  | + |
| 6338 | 1438103_at   | Region | Pcdhgc4         | 93707  | 18 | 38041516  | 38042278  | + |
| 6339 | 1455310_at   | Region | Rbm16           | 106583 | 17 | 3065810   | 3160145   | + |
| 6340 | 1449443_at   | Region | Decr1           | 67460  | 4  | 15844205  | 15872472  | - |
| 6341 | 1438955_x_at | Region | Ppif            | 105675 | 14 | 24069368  | 24075666  | + |
| 6342 | 1421975_a_at | Region | Add2            | 11519  | 6  | 86507734  | 86549220  | + |
| 6343 | 1441979_at   | Region | BC060267        | 212516 | 6  | 116248431 | 116275947 | - |
| 6344 | 1436715_s_at | Region | Cdipt           | 52858  | 7  | 121026080 | 121030232 | + |
| 6345 | 1437730_at   | Region | Ppp2r2a         | 71978  | 14 | 61544871  | 61704372  | - |
| 6346 | 1451288_s_at | Region | 1810043G02Rik   | 67884  | 10 | 78087790  | 78093995  | + |
| 6347 | 1428996_at   | Region | Gm1705          | 382051 | 8  | 103888941 | 103889832 | + |
| 6348 | 1416505_at   | Region | Nr4a1           | 15370  | 15 | 101325011 | 101332941 | + |
| 6349 | 1457543_at   | Region | 4921525L17Rik   | 70918  | 5  | 65025474  | 65063365  | + |
| 6350 | 1455803_at   | Region | Slco4a1         | 108115 | 2  | 180177936 | 180191810 | + |
| 6351 | 1439543_at   | Region | 1110064A23Rik   | 68893  | 2  | 31880307  | 31880831  | + |
| 6352 | 1434469_at   | Region | D8Ertd69e       | 73945  | 8  | 78854651  | 78892469  | + |
| 6353 | 1437225_x_at | Region | Gnai3           | 14679  | 3  | 107903041 | 107941856 | - |
| 6354 | 1455697_at   | Region | E130113E03Rik   | 319433 | 14 | 57089999  | 57211210  | + |
| 6355 | 1435170_at   | Region | 2310007F12Rik   | 69499  | X  | 144621704 | 144630913 | - |
| 6356 | 1426630_at   | Region | Exosc2          | 227715 | 2  | 31602898  | 31613482  | + |
| 6357 | 1417382_at   | Region | Entpd5          | 12499  | 12 | 81245023  | 81273816  | - |
| 6358 | 1432504_at   | Region | 1700106N22Rik   | 73582  | 17 | 82920574  | 83288888  | + |
| 6359 | 1435352_at   | Region | Pigk            | 329777 | 3  | 151707256 | 151782191 | + |
| 6360 | 1435292_at   | Region | Tbc1d4          | 210789 | 14 | 95967184  | 95986190  | - |
| 6361 | 1428229_at   | Region | Prkcn           | 75292  | 17 | 76772784  | 76835125  | - |
| 6362 | 1416691_at   | Region | Gtpbp2          | 56055  | 17 | 43670992  | 43679289  | + |
| 6363 | 1456919_at   | Region | A930013B10Rik   | 414094 | 11 | 88884711  | 88890185  | + |
| 6364 | 1418562_at   | Region | Sf3b1           | 81898  | 1  | 55286605  | 55333156  | - |
| 6365 | 1429392_at   | Region | Wdr40a          | 68970  | 4  | 41430155  | 41453667  | - |
| 6366 | 1453362_x_at | Region | Rps24           | 20088  | 14 | 22859652  | 22865117  | + |
| 6367 | 1417322_at   | Region | Hirc1           | 102115 | 10 | 81519803  | 81523644  | + |
| 6368 | 1429491_s_at | Region | Rif1            | 51869  | 2  | 52004994  | 52054222  | + |
| 6369 | 1416300_a_at | Region | Slc25a3         | 18674  | 10 | 91087904  | 91095289  | - |
| 6370 | 1446949_at   | Region | 4930431P19Rik   | 73886  | 7  | 103607453 | 103608424 | + |
|      |              |        | MGI:1353606 /// |        |    |           |           |   |
| 6371 | 1433680_x_at | Region | LOC433642       | 30954  | 12 | 108124289 | 108128532 | + |
| 6372 | 1439749_at   | Region | Zap70           | 22637  | 1  | 37056452  | 37077407  | + |
| 6373 | 1427093_at   | Region | 1500031N24Rik   | 69020  | 15 | 76010507  | 76025834  | + |
| 6374 | 1444336_at   | Region | None            | None   | 2  | 55360356  | 55361377  | - |
| 6375 | 1451927_a_at | Region | Mapk14          | 26416  | 17 | 26492551  | 26549631  | + |
| 6376 | 1446382_at   | Region | None            | None   | 10 | 102330633 | 102331300 | + |
| 6377 | 1459011_at   | Region | Btdb9           | 224671 | 17 | 28030141  | 28340405  | - |
| 6378 | 1417511_at   | Region | Lyar            | 17089  | 5  | 36726775  | 36740522  | + |
| 6379 | 1440360_at   | Region | Arl6ip5         | 65106  | 6  | 97677079  | 97699198  | + |
| 6380 | 1428532_at   | Region | 5930412E23Rik   | 77065  | 1  | 191312045 | 191358940 | + |
| 6381 | 1441391_at   | Region | Gnb1l           | 13972  | 16 | 17269870  | 17335574  | + |
| 6382 | 1422673_at   | Region | Prkcm           | 18760  | 12 | 47080386  | 47388266  | - |
| 6383 | 1417801_a_at | Region | Ppfibp2         | 19024  | 7  | 101545266 | 101694885 | + |
| 6384 | 1454859_a_at | Region | Rpl23           | 65019  | 11 | 97598630  | 97603460  | - |

|      |              |        |               |        |    |           |           |   |
|------|--------------|--------|---------------|--------|----|-----------|-----------|---|
| 6385 | 1443713_at   | Region | Chl1          | 12661  | 6  | 103991578 | 104209457 | + |
| 6386 | 1430360_at   | Region | 4833412C15Rik | 74613  | 15 | 77165687  | 77167758  | - |
| 6387 | 1437533_at   | Region | Birc4         | 11798  | X  | 36614524  | 36626297  | + |
| 6388 | 1416367_at   | Region | 1110001J03Rik | 66117  | 6  | 38671070  | 38675658  | + |
| 6389 | 1444041_at   | Region | AU041133      | 103369 | 10 | 82031015  | 82031654  | + |
| 6390 | 1434285_at   | Region | Frmd4a        | 209630 | 2  | 4348468   | 4531213   | + |
| 6391 | 1451700_a_at | Region | 1110007L15Rik | 67604  | 5  | 138250433 | 138268108 | + |
| 6392 | 1441313_x_at | Region | Lhx9          | 16876  | 1  | 138672251 | 138686188 | - |
| 6393 | 1423089_at   | Region | Tmod3         | 50875  | 9  | 75635361  | 75697149  | - |
| 6394 | 1418905_at   | Region | Nubp1         | 26425  | 16 | 10086475  | 10098031  | + |
| 6395 | 1417307_at   | Region | Dmd           | 13405  | X  | 78006916  | 79865697  | + |
| 6396 | 1433486_at   | Region | Clcn3         | 12725  | 8  | 59960629  | 60030782  | - |
| 6397 | 1449023_a_at | Region | Ezh1          | 14055  | 11 | 101012203 | 101049035 | - |
| 6398 | 1437185_s_at | Region | Tmsb10        | 19240  | 6  | 20039912  | 20040386  | + |
| 6399 | 1418603_at   | Region | Avpr1a        | 54140  | 10 | 122099734 | 122104688 | + |
| 6400 | 1424047_at   | Region | Dera          | 232449 | 6  | 138546535 | 138629830 | + |
| 6401 | 1416534_at   | Region | Dpf2          | 19708  | 19 | 5686167   | 5701613   | - |
| 6402 | 1423373_at   | Region | Rpp30         | 54364  | 19 | 35426401  | 35447443  | + |
| 6403 | 1434069_at   | Region | BC067047      | 277360 | 2  | 166023078 | 166170565 | - |
| 6404 | 1450981_at   | Region | Cnn2          | 12798  | 10 | 80111268  | 80118024  | + |
| 6405 | 1452627_at   | Region | Senp6         | 215351 | 9  | 80272603  | 80350480  | + |
| 6406 | 1430073_at   | Region | 2900016B01Rik | 67262  | 8  | 14389507  | 14405568  | + |
| 6407 | 1428527_at   | Region | Snx7          | 76561  | 3  | 116555087 | 116642555 | - |
| 6408 | 1455336_at   | Region | 9030625G08Rik | 66816  | 10 | 115056945 | 115071473 | - |
| 6409 | 1436205_at   | Region | Nfasc         | 269116 | 1  | 132427503 | 132603217 | - |
| 6410 | 1454211_a_at | Region | Shrm          | 27428  | 5  | 92019185  | 92300704  | + |
| 6411 | 1447301_at   | Region | Gm258         | 238276 | 12 | 73183905  | 73187107  | + |
| 6412 | 1421148_a_at | Region | Tial1         | 21843  | 7  | 122491640 | 122510627 | - |
| 6413 | 1426628_at   | Region | Tmem34        | 234463 | 8  | 76808045  | 76823552  | - |
| 6414 | 1442382_at   | Region | Mast4         | 328329 | 13 | 98930827  | 99546711  | - |
|      |              |        | LOC277193 /// |        |    |           |           |   |
|      |              |        | LOC432650 /// |        |    |           |           |   |
|      |              |        | LOC432898 /// |        |    |           |           |   |
|      |              |        | LOC433593 /// |        |    |           |           |   |
| 6415 | 1426936_at   | Region | LOC434667     | 277193 | 10 | 25882199  | 25886543  | + |
| 6416 | 1416989_at   | Region | 3100002B05Rik | 68299  | 11 | 75771884  | 75905288  | - |
| 6417 | 1455874_at   | Region | 1810059G22Rik | 67706  | 19 | 7969076   | 7970989   | - |
| 6418 | 1427088_at   | Region | Ccnt2         | 72949  | 1  | 127616552 | 127647225 | + |
| 6419 | 1440310_at   | Region | Cbfa2t1h      | 12395  | 4  | 13711747  | 13818082  | + |
| 6420 | 1424492_at   | Region | Trpc2         | 22064  | 7  | 96181838  | 96202292  | + |
| 6421 | 1416496_at   | Region | Mrfap1        | 67568  | 5  | 35301379  | 35303216  | - |
| 6422 | 1436703_x_at | Region | Snapc2        | 102209 | 8  | 3608060   | 3611178   | + |
| 6423 | 1428658_at   | Region | Pin4          | 69713  | X  | 96720808  | 96733533  | + |
| 6424 | 1447811_s_at | Region | Amigo1        | 229715 | 3  | 107982077 | 107987519 | + |
| 6425 | 1456512_at   | Region | Pdzrn4        | 239618 | 15 | 92665020  | 92838995  | + |
| 6426 | 1416614_at   | Region | Cri1          | 58521  | 2  | 125186948 | 125188636 | + |
| 6427 | 1429231_at   | Region | None          | None   | 7  | 73507486  | 73509559  | + |
| 6428 | 1458432_at   | Region | Nck2          | 17974  | 1  | 43740468  | 43865231  | + |
| 6429 | 1455810_a_at | Region | E130112L23Rik | 268739 | 14 | 47085678  | 47106098  | + |
| 6430 | 1439707_at   | Region | C230034O21Rik | 319342 | 3  | 38348095  | 38348495  | - |
| 6431 | 1433686_at   | Region | Cabin1        | 104248 | 10 | 75747852  | 75760539  | - |
| 6432 | 1434963_at   | Region | Supt3h        | 109115 | 17 | 42281336  | 42624366  | + |
| 6433 | 1434961_at   | Region | Asb1          | 65247  | 1  | 91386183  | 91386800  | + |
| 6434 | 1436377_at   | Region | Al428855      | 107173 | 19 | 6651918   | 6655327   | - |
| 6435 | 1453002_at   | Region | Sox11         | 20666  | 12 | 23886753  | 23889164  | - |
| 6436 | 1448486_at   | Region | Mut           | 17850  | 17 | 38451138  | 38475743  | + |
| 6437 | 1453928_a_at | Region | Ssb           | 20823  | 2  | 69717028  | 69727204  | + |
| 6438 | 1423737_at   | Region | Ndufs3        | 68349  | 2  | 90599385  | 90609470  | - |
| 6439 | 1436767_at   | Region | Luc7l2        | 192196 | 6  | 38687728  | 38745622  | + |
| 6440 | 1423390_at   | Region | Siah1a        | 20437  | 8  | 86007609  | 86029536  | - |
| 6441 | 1440104_at   | Region | Ranbp2        | 19386  | 10 | 58404785  | 58452252  | + |
| 6442 | 1448241_at   | Region | Gm2a          | 14667  | 11 | 54850958  | 54863739  | + |
| 6443 | 1445461_at   | Region | Lztr1         | 66863  | 16 | 16279939  | 16297298  | + |
| 6444 | 1424606_at   | Region | Cplx3         | 235415 | 9  | 57713916  | 57720156  | - |
| 6445 | 1427255_s_at | Region | Zfp445        | 235682 | 9  | 122869105 | 122879937 | - |

|      |              |        |               |        |    |           |           |   |
|------|--------------|--------|---------------|--------|----|-----------|-----------|---|
| 6446 | 1440491_at   | Region | Slc1a3        | 20512  | 15 | 8424368   | 8500974   | - |
| 6447 | 1424045_at   | Region | 5730437N04Rik | 70544  | 17 | 5318249   | 5347622   | - |
| 6448 | 1448311_at   | Region | Usp5          | 22225  | 6  | 125471787 | 125486215 | - |
| 6449 | 1423791_at   | Region | Ik            | 24010  | 18 | 36968481  | 36981400  | + |
| 6450 | 1426949_s_at | Region | Tpr           | 108989 | 1  | 150229615 | 150286691 | + |
| 6451 | 1447237_at   | Region | Pde4b         | 18578  | 4  | 101213908 | 101564744 | + |
| 6452 | 1417346_at   | Region | Pycard        | 66824  | 7  | 122041913 | 122043557 | - |
| 6453 | 1453734_at   | Region | Atrx          | 22589  | X  | 100401518 | 100530707 | - |
| 6454 | 1439603_at   | Region | ---           | 435662 | 2  | 35423370  | 35490493  | - |
| 6455 | 1419292_at   | Region | Htra3         | 78558  | 5  | 34139553  | 34167077  | - |
| 6456 | 1424149_at   | Region | 1110014D18Rik | 68501  | 15 | 59384784  | 59612226  | + |
| 6457 | 1428616_at   | Region | Zfp131        | 72465  | 13 | 10118     | 57012     | + |
| 6458 | 1448880_at   | Region | Ube2l3        | 22195  | 16 | 15923031  | 15972515  | - |
| 6459 | 1430816_at   | Region | 3110003A22Rik | 68053  | 4  | 6118254   | 6143705   | + |
| 6460 | 1432680_at   | Region | 9130009M17Rik | 71588  | 19 | 40018920  | 40020861  | - |
| 6461 | 1421405_at   | Region | Zim1          | 22776  | 7  | 5878764   | 5899877   | - |
| 6462 | 1421215_a_at | Region | Slmap         | 83997  | 14 | 24509380  | 24629945  | - |
| 6463 | 1427256_at   | Region | Cspg2         | 13003  | 13 | 85771194  | 85857423  | - |
| 6464 | 1426247_at   | Region | Stk24         | 223255 | 14 | 115857532 | 115949796 | - |
| 6465 | 1441528_at   | Region | Ttc15         | 217449 | 12 | 25256255  | 25315622  | - |
| 6466 | 1438539_at   | Region | Ascc1         | 69090  | 10 | 59958483  | 60060150  | + |
| 6467 | 1437484_at   | Region | Zbtb5         | 230119 | 4  | 44907164  | 44928192  | - |
| 6468 | 1425037_at   | Region | Fgd4          | 224014 | 16 | 15192773  | 15330937  | - |
| 6469 | 1455260_at   | Region | A830039H10Rik | 209707 | 5  | 44458346  | 44613918  | - |
| 6470 | 1455731_at   | Region | Slc29a3       | 71279  | 10 | 60670868  | 60713357  | - |
| 6471 | 1451984_at   | Region | Hnrp11        | 232989 | 7  | 20886817  | 20919507  | - |
| 6472 | 1419429_at   | Region | Cntfr         | 12804  | 4  | 41796349  | 41835894  | - |
| 6473 | 1426422_at   | Region | BC016188      | 212139 | 8  | 83395895  | 83410820  | - |
| 6474 | 1416439_at   | Region | 2410015N17Rik | 66422  | 7  | 121306690 | 121310398 | - |
| 6475 | 1420365_a_at | Region | Hnrpa2b1      | 53379  | 6  | 51608402  | 51617123  | - |
| 6476 | 1459835_s_at | Region | Dnaja1        | 15502  | 4  | 40861384  | 40873815  | + |
| 6477 | 1444452_at   | Region | D930002L09Rik | 320876 | 3  | 44860222  | 44860878  | + |
| 6478 | 1457125_at   | Region | None          | None   | 3  | 152201308 | 152201929 | - |
| 6479 | 1441083_at   | Region | None          | None   | 7  | 16500824  | 16501250  | - |
| 6480 | 1450724_at   | Region | MGI:2149839   | 84652  | 5  | 22424927  | 22494571  | - |
| 6481 | 1432439_at   | Region | 2610041B18Rik | 69930  | 7  | 37370962  | 37388012  | - |
| 6482 | 1448395_at   | Region | Sfrp1         | 20377  | 8  | 22166110  | 22202536  | + |
| 6483 | 1435433_at   | Region | Centg2        | 347722 | 1  | 89273393  | 89708522  | + |
| 6484 | 1438378_at   | Region | 1700013G23Rik | 69378  | 11 | 59672552  | 59673570  | - |
| 6485 | 1442667_at   | Region | Cdc40         | 71713  | 10 | 40910293  | 40992658  | - |
| 6486 | 1421743_a_at | Region | Pcbp2         | 18521  | 15 | 102531206 | 102559300 | + |
| 6487 | 1455039_a_at | Region | Sin3b         | 20467  | 8  | 71873343  | 71907207  | + |
| 6488 | 1454724_x_at | Region | 5730446C15Rik | 226016 | 19 | 20916280  | 20924330  | + |
| 6489 | 1428383_a_at | Region | 2310021P13Rik | 268721 | 14 | 19082480  | 19084932  | + |
| 6490 | 1435455_at   | Region | C79267        | 212632 | 4  | 138478741 | 138498358 | + |
| 6491 | 1428508_at   | Region | 1810061M12Rik | 67016  | 9  | 90089335  | 90158057  | - |
| 6492 | 1426827_at   | Region | A730098D12Rik | 231386 | 5  | 86084480  | 86098514  | + |
| 6493 | 1448828_at   | Region | Smc6l1        | 67241  | 12 | 10625170  | 10671328  | + |
| 6494 | 1428941_at   | Region | Zfp198        | 76007  | 14 | 51415856  | 51488606  | + |
| 6495 | 1455014_at   | Region | AV009015      | 103388 | 10 | 30645939  | 30647381  | - |
| 6496 | 1431123_s_at | Region | Dnajc8        | 68598  | 4  | 131496455 | 131514634 | + |
| 6497 | 1450472_s_at | Region | Smad3         | 17127  | 9  | 63767269  | 63878762  | - |
| 6498 | 1429816_at   | Region | Armc3         | 70882  | 2  | 19241312  | 19352242  | + |
| 6499 | 1417972_s_at | Region | Pop5          | 117109 | 5  | 114345472 | 114350598 | + |
| 6500 | 1443939_at   | Region | LOC230628     | 230628 | 4  | 113368101 | 113569645 | + |
| 6501 | 1454790_at   | Region | Wdr35         | 74682  | 12 | 8290207   | 8345162   | + |
| 6502 | 1455277_at   | Region | Hhip          | 15245  | 8  | 79185726  | 79272113  | - |
| 6503 | 1426679_at   | Region | 3110006P09Rik | 68036  | 15 | 36999940  | 37010315  | - |
| 6504 | 1418828_at   | Region | Thex1         | 67276  | 8  | 34268325  | 34298553  | - |
| 6505 | 1432385_a_at | Region | Agtbp1        | 67269  | 13 | 58109493  | 58216884  | - |
| 6506 | 1435966_x_at | Region | Mrpl13        | 68537  | 15 | 55539170  | 55562387  | - |
| 6507 | 1418295_s_at | Region | Dgat1         | 13350  | 15 | 76552397  | 76562200  | - |
| 6508 | 1448865_at   | Region | Hsd17b7       | 15490  | 1  | 169883718 | 169903346 | - |
| 6509 | 1444157_a_at | Region | Jarid1c       | 20591  | X  | 145767667 | 145808191 | + |
| 6510 | 1436985_at   | Region | Zfp644        | 52397  | 5  | 105678595 | 105758844 | - |

|      |              |        |               |        |    |           |           |   |
|------|--------------|--------|---------------|--------|----|-----------|-----------|---|
| 6511 | 1441998_at   | Region | None          | None   | 9  | 66718053  | 66718735  | + |
| 6512 | 1439775_at   | Region | Brwd3         | 382236 | X  | 103336563 | 103435714 | - |
| 6513 | 1429762_a_at | Region | Bbs5          | 72569  | 2  | 69502655  | 69522969  | + |
| 6514 | 1417851_at   | Region | Cxcl13        | 55985  | 5  | 94970111  | 94974240  | + |
| 6515 | 1424332_at   | Region | Rab40c        | 224624 | 17 | 23689151  | 23711170  | - |
| 6516 | 1430066_at   | Region | 4930589M24Rik | 75906  | 10 | 53878840  | 53940180  | - |
| 6517 | 1444126_at   | Region | None          | None   | 17 | 62026280  | 62027138  | - |
| 6518 | 1434775_at   | Region | Pard3         | 93742  | 8  | 126354044 | 126919239 | + |
| 6519 | 1438315_x_at | Region | Akr7a5        | 110198 | 4  | 138192005 | 138199686 | + |
| 6520 | 1452840_at   | Region | 1500009L16Rik | 69784  | 10 | 83610822  | 83650687  | + |
| 6521 | 1435472_at   | Region | Kremen1       | 84035  | 11 | 5086339   | 5156397   | - |
| 6522 | 1433753_x_at | Region | Eral1         | 57837  | 11 | 77799035  | 77806004  | - |
| 6523 | 1440020_at   | Region | Rlf           | 109263 | 4  | 120167817 | 120237523 | - |
| 6524 | 1454698_at   | Region | AW742319      | 57874  | 9  | 65109184  | 65143902  | - |
| 6525 | 1456879_at   | Region | C130022K22Rik | 232236 | 6  | 92326024  | 92347807  | + |
| 6526 | 1452461_a_at | Region | MGC79224      | 432486 | 10 | 88350966  | 88419158  | + |
| 6527 | 1447483_s_at | Region | 2610002F03Rik | 72091  | 2  | 26571927  | 26572166  | - |
| 6528 | 1435834_at   | Region | Gas2          | 14453  | 7  | 46048672  | 46163985  | + |
| 6529 | 1453709_at   | Region | 3426406O18Rik | 70677  | 9  | 32185933  | 32186952  | + |
| 6530 | 1460737_at   | Region | Igbbp1        | 18518  | X  | 95095706  | 95117362  | + |
| 6531 | 1436630_at   | Region | None          | None   | 7  | 91770544  | 91770961  | - |
| 6532 | 1428409_at   | Region | Mak3          | 72117  | 16 | 43023139  | 43046694  | + |
| 6533 | 1433877_at   | Region | 4732473B16Rik | 100342 | 4  | 132441036 | 132448835 | + |
| 6534 | 1438699_at   | Region | Srd5a1        | 78925  | 13 | 65625480  | 65642329  | - |
| 6535 | 1423661_s_at | Region | Ctdsp2        | 52468  | 10 | 126728331 | 126732688 | + |
| 6536 | 1449632_s_at | Region | Fkbp10        | 14230  | 11 | 100236784 | 100245912 | + |
| 6537 | 1434184_s_at | Region | 9430080K19Rik | 68120  | 1  | 40319317  | 40320478  | + |
| 6538 | 1433801_at   | Region | 9930012K11Rik | 268759 | 14 | 64470394  | 64475460  | - |
| 6539 | 1418265_s_at | Region | Irf2          | 16363  | 8  | 45686560  | 45794326  | + |
| 6540 | 1423026_at   | Region | Rad51c        | 114714 | 11 | 87107378  | 87132413  | - |
| 6541 | 1425861_x_at | Region | Cacna2d1      | 12293  | 5  | 14583526  | 14791513  | + |
| 6542 | 1426461_at   | Region | Ugp2          | 216558 | 11 | 21215937  | 21265268  | - |
| 6543 | 1429926_at   | Region | 6720473G16Rik | 77078  | X  | 106710866 | 106711990 | + |
| 6544 | 1450954_at   | Region | Yme11         | 27377  | 2  | 23088708  | 23130798  | + |
| 6545 | 1430074_x_at | Region | 8430426H19Rik | 71508  | 13 | 7134      | 10068     | + |
| 6546 | 1455553_at   | Region | 5330401P04Rik | 227094 | 1  | 52934448  | 52954337  | + |
| 6547 | 1436681_x_at | Region | 0610009D07Rik | 66055  | 12 | 3985835   | 3999611   | + |
| 6548 | 1450953_at   | Region | Wdr39         | 26371  | 2  | 126754791 | 126761595 | - |
| 6549 | 1425507_at   | Region | Arfrp1        | 76688  | 2  | 181074790 | 181082318 | - |
| 6550 | 1452198_at   | Region | Fbxl10        | 30841  | 5  | 122023577 | 122142001 | - |
| 6551 | 1433866_x_at | Region | Prdx1         | 18477  | 4  | 115644504 | 115658905 | + |
| 6552 | 1452526_a_at | Region | Pax6          | 18508  | 2  | 105381199 | 105401823 | + |
| 6553 | 1418167_at   | Region | Tcfap4        | 83383  | 16 | 4216161   | 4231223   | - |
| 6554 | 1444897_at   | Region | AU017263      | 104936 | 12 | 94771317  | 94772245  | + |
| 6555 | 1442302_at   | Region | None          | None   | 11 | 32125455  | 32126040  | + |
| 6556 | 1425646_at   | Region | BC016495      | 225994 | 19 | 17878968  | 17899143  | + |
| 6557 | 1419734_at   | Region | Actb          | 11461  | 5  | 141967352 | 141970960 | - |
| 6558 | 1435899_at   | Region | 9430079B08Rik | 320481 | 1  | 106661191 | 106663294 | - |
| 6559 | 1428643_at   | Region | Mgat5         | 107895 | 1  | 127142098 | 127323193 | + |
| 6560 | 1460698_a_at | Region | Sec11l3       | 66286  | 18 | 66033804  | 66050883  | + |
| 6561 | 1423710_at   | Region | Dlst          | 78920  | 12 | 81979590  | 82002780  | + |
| 6562 | 1460254_at   | Region | 1810049H13Rik | 66431  | 11 | 120277697 | 120279156 | - |
| 6563 | 1427285_s_at | Region | Malat1        | 72289  | 19 | 5588755   | 5591120   | - |
| 6564 | 1456349_x_at | Region | Sumo1         | 22218  | 1  | 59942975  | 59974347  | - |
| 6565 | 1448735_at   | Region | Cp            | 12870  | 3  | 19298453  | 19333864  | + |
| 6566 | 1445191_at   | Region | 4932702D22Rik | 241624 | 2  | 119033253 | 119061476 | - |
| 6567 | 1421733_a_at | Region | Tpst1         | 22021  | 5  | 129243151 | 129305554 | + |
| 6568 | 1457694_at   | Region | 6430537H07Rik | 226265 | 19 | 58542983  | 58570971  | + |
| 6569 | 1439597_at   | Region | 4932417H02Rik | 74370  | 11 | 119424903 | 119718575 | + |
| 6570 | 1443279_at   | Region | Nlk           | 18099  | 11 | 78292827  | 78423032  | - |
| 6571 | 1441635_at   | Region | Nr6a1         | 14536  | 2  | 38655532  | 38859850  | - |
| 6572 | 1424204_at   | Region | Mrpl13        | 68537  | 15 | 55539170  | 55562387  | - |
| 6573 | 1418244_at   | Region | Nat5          | 67877  | 2  | 145360205 | 145373252 | + |
| 6574 | 1436758_at   | Region | Hdac4         | 208727 | 1  | 91760230  | 91975898  | - |
| 6575 | 1428285_at   | Region | 8430427H17Rik | 329540 | 2  | 152864402 | 152940719 | - |



|      |              |        |               |        |      |           |           |      |
|------|--------------|--------|---------------|--------|------|-----------|-----------|------|
| 6576 | 1448958_at   | Region | MGI:1929890   | 64164  | 1    | 155937531 | 155950350 | +    |
| 6577 | 1422533_at   | Region | Cyp51         | 13121  | 5    | 4088954   | 4110454   | -    |
| 6578 | 1435257_at   | Region | Klhl17        | 231003 | NONE | NONE      | NONE      | NONE |
| 6579 | 1436102_at   | Region | Sec22i3       | 215474 | 9    | 121695485 | 121719087 | -    |
| 6580 | 1436996_x_at | Region | Lzp-s         | 17110  | 10   | 116977248 | 116982319 | -    |
| 6581 | 1418339_at   | Region | Recql         | 19691  | 6    | 143205415 | 143230300 | -    |
| 6582 | 1418964_at   | Region | Pigm          | 67556  | 1    | 172305475 | 172309452 | +    |
| 6583 | 1458969_at   | Region | AU019559      | 102225 | 8    | 11158707  | 11159185  | +    |
| 6584 | 1450405_at   | Region | Mrpl19        | 56284  | 6    | 82245436  | 82301881  | -    |
| 6585 | 1458439_a_at | Region | 2310047C04Rik | 224170 | 16   | 47767664  | 47835780  | -    |
| 6586 | 1424644_at   | Region | Tbcc          | 72726  | 17   | 44403093  | 44404256  | +    |
| 6587 | 1437709_x_at | Region | Ttc13         | 234875 | 8    | 123958404 | 124009066 | -    |
| 6588 | 1458679_a_at | Region | Tatdn1        | 69694  | 15   | 58900953  | 58944887  | -    |
| 6589 | 1435866_s_at | Region | Hist3h2a      | 319162 | 11   | 58680314  | 58682303  | +    |
| 6590 | 1452042_a_at | Region | 5730537D05Rik | 70652  | 3    | 79543274  | 79572782  | -    |
| 6591 | 1456153_at   | Region | Ssh2          | 237860 | 11   | 77053112  | 77181207  | +    |
| 6592 | 1419521_at   | Region | Zfp94         | 22756  | 7    | 19475849  | 19490824  | -    |
| 6593 | 1427922_at   | Region | 2310061C15Rik | 66531  | 8    | 116217815 | 116249733 | -    |
| 6594 | 1433803_at   | Region | Jak1          | 16451  | 4    | 100111937 | 100224138 | -    |
| 6595 | 1449222_at   | Region | Ebi3          | 50498  | 17   | 53590984  | 53595366  | +    |
| 6596 | 1426242_at   | Region | Polr2a        | 20020  | 11   | 69460068  | 69483881  | -    |
| 6597 | 1424322_at   | Region | Apex2         | 77622  | X    | 144105902 | 144122544 | -    |
| 6598 | 1452916_at   | Region | 2610014H22Rik | 75410  | 7    | 25981548  | 25983534  | -    |
| 6599 | 1435556_at   | Region | Zfp597        | 71063  | 16   | 3533092   | 3535419   | -    |
| 6600 | 1421323_a_at | Region | E430034L04Rik | 23881  | 5    | 91390328  | 91419486  | -    |
| 6601 | 1453750_x_at | Region | Pitpnc1       | 71795  | 11   | 107033195 | 107291788 | -    |
| 6602 | 1442484_at   | Region | D9ErtD306e    | 52203  | 9    | 88820023  | 88820728  | -    |
| 6603 | 1434622_at   | Region | lqce          | 74239  | 5    | 139662337 | 139701210 | -    |
| 6604 | 1433534_a_at | Region | Cct2          | 12461  | 10   | 116740451 | 116753217 | -    |
| 6605 | 1423345_at   | Region | Degs1         | 13244  | 1    | 182232966 | 182239955 | -    |
| 6606 | 1450113_at   | Region | None          | None   | 12   | 75605546  | 75695819  | +    |
| 6607 | 1416223_at   | Region | BC003251      | 79566  | 11   | 58056379  | 58073354  | +    |
| 6608 | 1433447_x_at | Region | Cct4          | 12464  | 11   | 22885383  | 22898126  | +    |
| 6609 | 1427881_at   | Region | 4930588M11Rik | 99480  | 3    | 121052751 | 121063608 | +    |
| 6610 | 1424625_a_at | Region | 6030446L19Rik | 227801 | 2    | 37731153  | 38219509  | -    |
| 6611 | 1419617_at   | Region | Kcnn1         | 84036  | 8    | 69998871  | 70011298  | -    |
| 6612 | 1440650_at   | Region | Slit2         | 20563  | 5    | 46748038  | 47069334  | +    |
| 6613 | 1455138_x_at | Region | Cfl1          | 12631  | 19   | 5279315   | 5283991   | +    |
| 6614 | 1423235_at   | Region | Ap3b1         | 11774  | 13   | 90543097  | 90750381  | +    |
| 6615 | 1442583_a_at | Region | Al854703      | 243373 | 6    | 48760814  | 48766567  | +    |
| 6616 | 1448079_at   | Region | Rnf166        | 68718  | 8    | 121847734 | 121858060 | -    |
| 6617 | 1420795_at   | Region | Fgf9          | 14180  | 14   | 52607790  | 52644523  | +    |
| 6618 | 1453263_at   | Region | Mak10         | 78689  | 13   | 58245009  | 58294396  | +    |
| 6619 | 1440026_at   | Region | Trps1         | 83925  | 15   | 50659276  | 50888038  | -    |
| 6620 | 1429471_at   | Region | 1110017D15Rik | 73721  | 4    | 41643865  | 41656183  | -    |
| 6621 | 1453013_at   | Region | 1110034O07Rik | 68744  | 15   | 102267622 | 102274961 | +    |
| 6622 | 1420945_at   | Region | Atrx          | 22589  | X    | 100401518 | 100530707 | -    |
| 6623 | 1426292_at   | Region | 6330581L23Rik | 233056 | 7    | 25230836  | 25245657  | +    |
| 6624 | 1427446_s_at | Region | Ttn           | 22138  | 2    | 76401836  | 76406317  | -    |
| 6625 | 1458489_at   | Region | Prkag1        | 19082  | 15   | 98869730  | 98888520  | -    |
| 6626 | 1434056_a_at | Region | Gm137         | 230075 | 4    | 40409442  | 40418222  | -    |
| 6627 | 1460553_at   | Region | 1700025K23Rik | 66337  | 10   | 39188204  | 39203291  | -    |
| 6628 | 1431360_s_at | Region | 4921520P21Rik | 70887  | X    | 97504587  | 97510052  | -    |
| 6629 | 1451471_at   | Region | 3230401I01Rik | 67417  | 7    | 115916679 | 115944921 | -    |
| 6630 | 1422766_at   | Region | Stau1         | 20853  | 2    | 166405006 | 166453032 | -    |
| 6631 | 1423118_at   | Region | 1200014J11Rik | 66874  | 11   | 72773538  | 72805874  | +    |
| 6632 | 1421729_a_at | Region | Fert2         | 14158  | 17   | 61637960  | 61842673  | +    |
| 6633 | 1432182_at   | Region | 4922502B01Rik | 70954  | 8    | 108548150 | 108549390 | -    |
| 6634 | 1441349_at   | Region | LOC552904     | 552904 | 3    | 128945934 | 128946968 | -    |
| 6635 | 1440440_at   | Region | None          | None   | 9    | 13318586  | 13319228  | +    |
| 6636 | 1426842_at   | Region | Ythdf3        | 229096 | 3    | 15522868  | 15556473  | +    |
| 6637 | 1455311_at   | Region | Dgcr8         | 94223  | 16   | 17025006  | 17060210  | -    |
| 6638 | 1429186_a_at | Region | Cdadc1        | 71891  | 14   | 54094451  | 54133002  | -    |
| 6639 | 1457175_at   | Region | Numb          | 18222  | 12   | 80659465  | 80706369  | -    |
| 6640 | 1441931_x_at | Region | Gss           | 14854  | 2    | 155020120 | 155044513 | -    |

|      |              |        |                                                                                                             |        |      |           |           |      |
|------|--------------|--------|-------------------------------------------------------------------------------------------------------------|--------|------|-----------|-----------|------|
| 6641 | 1435036_at   | Region | A530050D06Rik                                                                                               | 104816 | 12   | 107586202 | 107606905 | +    |
| 6642 | 1455437_at   | Region | BC033915                                                                                                    | 70661  | 9    | 46026130  | 46236394  | +    |
| 6643 | 1454726_s_at | Region | AW456874                                                                                                    | 218232 | 13   | 48175930  | 48223631  | -    |
| 6644 | 1448727_at   | Region | Tle6                                                                                                        | 114606 | 10   | 81727590  | 81737585  | -    |
| 6645 | 1424821_at   | Region | Ndfip1                                                                                                      | 65113  | 18   | 38640514  | 38688909  | +    |
| 6646 | 1436379_at   | Region | 2610312F20Rik                                                                                               | 70461  | 7    | 74390859  | 74491412  | -    |
| 6647 | 1456498_at   | Region | Itga4                                                                                                       | 16401  | 2    | 78953394  | 79028523  | +    |
| 6648 | 1430522_a_at | Region | Vamp5                                                                                                       | 53620  | 6    | 72701002  | 72702306  | -    |
| 6649 | 1458641_at   | Region | Braf                                                                                                        | 109880 | 6    | 39749542  | 39860924  | -    |
| 6650 | 1443829_x_at | Region | Coasy                                                                                                       | 71743  | 11   | 100903693 | 100907704 | +    |
| 6651 | 1420618_at   | Region | Cpeb4                                                                                                       | 67579  | 11   | 31767001  | 31826367  | +    |
| 6652 | 1430623_s_at | Region | 5830411E10Rik<br>Tom1 ///                                                                                   | 109019 | 1    | 51769634  | 51779343  | -    |
| 6653 | 1435055_a_at | Region | LOC545878                                                                                                   | 21968  | 8    | 74197771  | 74234173  | +    |
| 6654 | 1425007_at   | Region | Zfp566                                                                                                      | 72556  | 7    | 25492062  | 25505056  | -    |
| 6655 | 1434254_at   | Region | Gna11                                                                                                       | 14672  | 10   | 81666416  | 81680827  | -    |
| 6656 | 1454648_s_at | Region | D10Wsu102e                                                                                                  | 28109  | 10   | 83248177  | 83256759  | +    |
| 6657 | 1424259_at   | Region | 2400010G15Rik                                                                                               | 76483  | 17   | 23384865  | 23468723  | +    |
| 6658 | 1422110_at   | Region | Hr                                                                                                          | 15460  | 14   | 64870045  | 64889532  | +    |
| 6659 | 1424947_at   | Region | Dncl1                                                                                                       | 235661 | 9    | 114662314 | 114697320 | +    |
| 6660 | 1417046_at   | Region | Tusc4                                                                                                       | 56032  | 9    | 107608007 | 107611476 | +    |
| 6661 | 1437057_at   | Region | Egfl3                                                                                                       | 230971 | 4    | 152663105 | 152768075 | +    |
| 6662 | 1452159_at   | Region | 2310001A20Rik                                                                                               | 71881  | 2    | 150040017 | 150065459 | -    |
| 6663 | 1435965_at   | Region | Cnot3                                                                                                       | 232791 | 7    | 95942392  | 95943786  | -    |
| 6664 | 1430555_s_at | Region | Lrig3                                                                                                       | 320398 | 10   | 125665572 | 125714849 | +    |
| 6665 | 1424458_at   | Region | Jmjd2c                                                                                                      | 76804  | 4    | 73313167  | 73467080  | +    |
| 6666 | 1420887_a_at | Region | Bcl2l1                                                                                                      | 12048  | 2    | 152237604 | 152288618 | -    |
| 6667 | 1459457_at   | Region | Camk2d                                                                                                      | 108058 | 3    | 125480582 | 125726370 | +    |
| 6668 | 1417072_at   | Region | Slc22a6                                                                                                     | 18399  | 19   | 7814586   | 7823070   | +    |
| 6669 | 1450657_at   | Region | Ppie                                                                                                        | 56031  | 4    | 122154237 | 122167053 | -    |
| 6670 | 1460094_at   | Region | AI790205                                                                                                    | 277463 | 2    | 31084496  | 31148729  | +    |
| 6671 | 1442617_at   | Region | Cbfb                                                                                                        | 12400  | 8    | 104466302 | 104513614 | +    |
| 6672 | 1416763_at   | Region | G431001I09Rik                                                                                               | 98828  | 2    | 5711566   | 5762232   | -    |
| 6673 | 1459839_x_at | Region | Btbd11                                                                                                      | 74007  | 10   | 8552377   | 8552631   | +    |
| 6674 | 1439416_x_at | Region | 4930542G03Rik ///<br>LOC433839                                                                              | 227613 | 2    | 25154324  | 25156803  | -    |
| 6675 | 1433387_at   | Region | 2900022M07Rik                                                                                               | 72951  | NONE | NONE      | NONE      | NONE |
| 6676 | 1452925_a_at | Region | 38416                                                                                                       | 69104  | 19   | 99847336  | 99848552  | -    |
| 6677 | 1453127_at   | Region | Ppm1j                                                                                                       | 71887  | 3    | 104207837 | 104212729 | +    |
| 6678 | 1453360_a_at | Region | Tex9                                                                                                        | 21778  | 9    | 72593752  | 72624808  | -    |
| 6679 | 1426446_at   | Region | 6430548M08Rik                                                                                               | 234797 | 8    | 119500738 | 119518927 | +    |
| 6680 | 1436620_at   | Region | 4732496G21Rik                                                                                               | 320162 | 11   | 106610364 | 106639918 | +    |
| 6681 | 1438517_at   | Region | Wwox                                                                                                        | 80707  | 8    | 113753199 | 114666211 | +    |
| 6682 | 1443799_at   | Region | Ppp1r14c                                                                                                    | 76142  | 10   | 7041618   | 7140096   | -    |
| 6683 | 1427067_at   | Region | 4933439F18Rik                                                                                               | 66771  | 11   | 60142945  | 60170919  | +    |
| 6684 | 1424902_at   | Region | Plxdc1                                                                                                      | 72324  | 11   | 97744325  | 97807467  | -    |
|      |              |        | Pcdha4 ///<br>///<br>Pcdha5 ///<br>///<br>Pcdha1 ///<br>///<br>Pcdha12 ///<br>///<br>Pcdhac1 ///<br>Pcdhac2 |        |      |           |           |      |
| 6685 | 1424341_s_at | Region | Pcdhac2                                                                                                     | 116731 | 18   | 37367691  | 37411386  | +    |
| 6686 | 1459317_at   | Region | Ank2                                                                                                        | 109676 | 3    | 125805551 | 125881703 | -    |
| 6687 | 1426614_at   | Region | Prkcbp1                                                                                                     | 228880 | 2    | 165242034 | 165353683 | -    |
| 6688 | 1443182_at   | Region | A930041C12Rik                                                                                               | 78443  | 5    | 106693490 | 106694118 | +    |
| 6689 | 1423993_at   | Region | Atp6v1f                                                                                                     | 66144  | 6    | 29514880  | 29517606  | +    |
| 6690 | 1439728_at   | Region | D330027H18Rik                                                                                               | 101359 | 6    | 29216329  | 29226681  | -    |
| 6691 | 1460693_a_at | Region | Col9a3                                                                                                      | 12841  | 2    | 180315202 | 180339143 | +    |
| 6692 | 1455929_x_at | Region | Ppp2r1a                                                                                                     | 51792  | 17   | 18817271  | 18837722  | +    |
| 6693 | 1452817_at   | Region | Smyd3                                                                                                       | 69726  | 1    | 178910022 | 179472249 | -    |

|      |              |        |               |        |    |           |           |   |
|------|--------------|--------|---------------|--------|----|-----------|-----------|---|
| 6694 | 1457548_at   | Region | Adamts6       | 108154 | 13 | 100587418 | 100712006 | + |
| 6695 | 1416880_at   | Region | Mcl1          | 17210  | 3  | 95146619  | 95151011  | + |
| 6696 | 1451901_at   | Region | Smarca3       | 20585  | 3  | 19399088  | 19457883  | + |
| 6697 | 1434019_at   | Region | Pdap1         | 231887 | 5  | 144168088 | 144178675 | - |
| 6698 | 1416616_s_at | Region | Clpp          | 53895  | 17 | 54680231  | 54686109  | + |
| 6699 | 1430195_at   | Region | 2810043O03Rik | 72697  | 9  | 72118680  | 72120526  | - |
| 6700 | 1455112_at   | Region | Amid          | 71361  | 10 | 61681617  | 61705566  | + |
| 6701 | 1424179_at   | Region | Plekhj1       | 78670  | 10 | 80928041  | 80930223  | - |
| 6702 | 1454774_at   | Region | Zfp445        | 235682 | 9  | 122869105 | 122879937 | - |
| 6703 | 1454971_x_at | Region | Tgfb1i4       | 21807  | 14 | 70758316  | 70850256  | + |
| 6704 | 1429367_at   | Region | 2510001I10Rik | 74781  | 5  | 141637713 | 141677424 | + |
| 6705 | 1458807_at   | Region | Epb4.1        | 269587 | 4  | 130721061 | 130868982 | - |
| 6706 | 1429431_at   | Region | Zfpn1a5       | 67143  | 7  | 125704215 | 125726182 | - |
| 6707 | 1438977_x_at | Region | Ran           | 19384  | 5  | 128195181 | 128199286 | + |
| 6708 | 1419670_at   | Region | Ftcd          | 14317  | 10 | 76676702  | 76691057  | + |
| 6709 | 1441567_at   | Region | 4732465J09Rik | 270163 | 9  | 59868073  | 60046149  | + |
| 6710 | 1425742_a_at | Region | Tgfb1i4       | 21807  | 14 | 70758316  | 70850256  | + |
| 6711 | 1426841_at   | Region | Ythdf3        | 229096 | 3  | 15522868  | 15556473  | + |
| 6712 | 1419173_at   | Region | Acy1          | 109652 | 9  | 106426550 | 106431807 | - |
| 6713 | 1423415_at   | Region | Gpr83         | 14608  | 9  | 14693694  | 14702939  | + |
| 6714 | 1434308_at   | Region | Slc43a2       | 215113 | 11 | 75257363  | 75300699  | + |
| 6715 | 1417713_at   | Region | Eif2s2        | 67204  | 2  | 154328353 | 154349719 | - |
| 6716 | 1416376_at   | Region | 1810014L12Rik | 69071  | 11 | 78267476  | 78276394  | - |
| 6717 | 1459677_at   | Region | None          | None   | 3  | 95357721  | 95357967  | - |
| 6718 | 1419460_at   | Region | Rpp14         | 67053  | 14 | 5748595   | 5760064   | + |
| 6719 | 1437642_at   | Region | Hrbl          | 231801 | 5  | 136601442 | 136635293 | - |
| 6720 | 1416425_at   | Region | Pex19         | 19298  | 1  | 172055691 | 172064699 | + |
| 6721 | 1437159_at   | Region | Glb1          | 12091  | 9  | 114364315 | 114438701 | + |
| 6722 | 1436208_at   | Region | Asb1          | 65247  | 1  | 91385187  | 91386171  | + |
| 6723 | 1425341_at   | Region | Kcnk3         | 16527  | 5  | 29047028  | 29082424  | + |
| 6724 | 1420502_at   | Region | Sat1          | 20229  | X  | 148839287 | 148842558 | - |
| 6725 | 1447270_at   | Region | Rybp          | 56353  | 6  | 100696164 | 100754244 | - |
| 6726 | 1454649_at   | Region | Srd5a1        | 78925  | 13 | 65625480  | 65642329  | - |
| 6727 | 1415990_at   | Region | Vdac2         | 22334  | 14 | 20196229  | 20210547  | + |
| 6728 | 1455881_at   | Region | Ier5l         | 72500  | 2  | 30403700  | 30406381  | - |
| 6729 | 1423394_at   | Region | Pcyox1        | 66881  | 6  | 86820763  | 86870063  | - |
| 6730 | 1418910_at   | Region | Bmp7          | 12162  | 2  | 172330153 | 172400760 | - |
| 6731 | 1447655_x_at | Region | Sox6          | 20679  | 7  | 109336962 | 109662307 | - |
| 6732 | 1426437_s_at | Region | Hdac3         | 15183  | 18 | 38160701  | 38178657  | - |
| 6733 | 1418626_a_at | Region | Clu           | 12759  | 14 | 60496045  | 60508968  | + |
| 6734 | 1421052_a_at | Region | Sms           | 20603  | X  | 151043359 | 151091439 | - |
| 6735 | 1455337_at   | Region | 9030023J02Rik | 320417 | 16 | 15187902  | 15188353  | - |
| 6736 | 1428736_at   | Region | 9130427A09Rik | 107022 | 18 | 56619358  | 56721861  | + |
| 6737 | 1434801_x_at | Region | Slc25a5       | 11740  | X  | 31416206  | 31419360  | + |
| 6738 | 1449861_at   | Region | Nek4          | 23955  | 14 | 29083439  | 29119352  | + |
| 6739 | 1416906_at   | Region | Anapc5        | 59008  | 5  | 121940636 | 121974194 | - |
| 6740 | 1433752_s_at | Region | D030016E14Rik | 320714 | 8  | 46456668  | 46491560  | - |
| 6741 | 1423612_at   | Region | Al462438      | 98985  | 2  | 84420871  | 84425017  | - |
| 6742 | 1417495_x_at | Region | Cp            | 12870  | 3  | 19298453  | 19333864  | + |
| 6743 | 1436930_x_at | Region | Hmbs          | 15288  | 9  | 44325203  | 44333042  | - |
| 6744 | 1439088_at   | Region | Pdzk8         | 107368 | 19 | 58893653  | 58894229  | - |
| 6745 | 1421987_at   | Region | Papss2        | 23972  | 19 | 31944210  | 31991770  | + |
| 6746 | 1446409_at   | Region | Gtdc1         | 227835 | 2  | 44496584  | 44793784  | - |
| 6747 | 1427182_s_at | Region | D18Ertd653e   | 52662  | 18 | 68295003  | 68486335  | + |
| 6748 | 1456926_at   | Region | Rims4         | 241770 | 2  | 163320850 | 163375652 | - |
|      |              |        | LOC545161 /// |        |    |           |           |   |
| 6749 | 1437014_x_at | Region | LOC547275     | 545161 | 16 | 47056509  | 47057435  | + |
| 6750 | 1435039_a_at | Region | Pip5k1b       | 18720  | 3  | 94547426  | 94594689  | - |
| 6751 | 1441545_at   | Region | 9230115F04Rik | 320841 | 4  | 107501254 | 107502139 | + |
| 6752 | 1428924_at   | Region | Mocs3         | 69372  | 2  | 167739156 | 167741028 | + |
| 6753 | 1418979_at   | Region | 9030611N15Rik | 105387 | 13 | 3943971   | 3974802   | + |
| 6754 | 1459981_s_at | Region | Rsbm1         | 229675 | 3  | 103355742 | 103393938 | + |
| 6755 | 1454789_x_at | Region | 2610031L17Rik | 68879  | 2  | 181318349 | 181372617 | + |
| 6756 | 1423575_a_at | Region | Wbscr22       | 66138  | 5  | 134066451 | 134078451 | - |
| 6757 | 1438892_at   | Region | Qk            | 19317  | 17 | 8850890   | 8959849   | - |

|      |              |        |               |        |      |           |           |      |
|------|--------------|--------|---------------|--------|------|-----------|-----------|------|
| 6758 | 1436792_at   | Region | BB081391      | 434204 | 7    | 75379417  | 75404632  | +    |
| 6759 | 1423116_at   | Region | Dom3z         | 112403 | 17   | 32539831  | 32542044  | +    |
| 6760 | 1417926_at   | Region | Luzp5         | 76044  | 12   | 112179035 | 112226477 | +    |
| 6761 | 1438377_x_at | Region | Slc13a3       | 114644 | 2    | 164862028 | 164929930 | -    |
| 6762 | 1458573_at   | Region | None          | None   | NONE | NONE      | NONE      | NONE |
| 6763 | 1457118_at   | Region | 6230417E10Rik | 271849 | 2    | 125143458 | 125237240 | -    |
| 6764 | 1418694_at   | Region | Kcmf1         | 74287  | 6    | 73177405  | 73198187  | -    |
| 6765 | 1460655_a_at | Region | Ubp1          | 22221  | 9    | 113984479 | 114029010 | +    |
| 6766 | 1435586_at   | Region | A730042J05Rik | 234069 | 8    | 12455825  | 12484040  | -    |
| 6767 | 1439932_at   | Region | None          | None   | 4    | 6148142   | 6148835   | +    |
| 6768 | 1417218_at   | Region | 2810048G17Rik | 72691  | 19   | 46683539  | 46689594  | -    |
| 6769 | 1424782_at   | Region | 2610318G18Rik | 67171  | 3    | 106343709 | 106369981 | +    |
| 6770 | 1455351_at   | Region | AU023006      | 102683 | 9    | 95365380  | 95368889  | -    |
| 6771 | 1450199_a_at | Region | Stab1         | 192187 | 14   | 29270851  | 29300410  | -    |
| 6772 | 1445259_at   | Region | None          | None   | 2    | 65537683  | 65539267  | +    |
| 6773 | 1443362_at   | Region | Zfp277        | 246196 | 12   | 36913519  | 37044268  | -    |
| 6774 | 1455524_at   | Region | 2810046L04Rik | 212127 | 3    | 53098037  | 53115975  | +    |
| 6775 | 1439255_s_at | Region | Tm7sf1        | 83924  | 13   | 12777506  | 12812482  | -    |
| 6776 | 1443524_x_at | Region | Bcl10         | 12042  | 3    | 144898767 | 144908672 | +    |
| 6777 | 1454865_at   | Region | Slc9a8        | 77031  | 2    | 166878454 | 166933731 | +    |
| 6778 | 1457015_at   | Region | None          | None   | 14   | 62659605  | 62659816  | +    |
| 6779 | 1448907_at   | Region | Thop1         | 50492  | 10   | 81203817  | 81216225  | +    |
| 6780 | 1448336_at   | Region | Drg1          | 13494  | 11   | 3144709   | 3161173   | -    |
| 6781 | 1438167_x_at | Region | Flcn          | 216805 | 11   | 59517379  | 59535402  | -    |
| 6782 | 1426126_a_at | Region | MGC30332      | 101883 | 7    | 25978772  | 25980651  | +    |
| 6783 | 1420425_at   | Region | Prdm1         | 12142  | 10   | 44551626  | 44573197  | -    |
| 6784 | 1441223_at   | Region | 38415         | 381270 | 1    | 72728777  | 72838594  | -    |
| 6785 | 1418036_at   | Region | Prim2         | 19076  | 1    | 33722760  | 33938707  | -    |
| 6786 | 1416932_at   | Region | Cog2          | 76332  | 8    | 123807899 | 123839080 | +    |
| 6787 | 1417739_at   | Region | 1110030J09Rik | 66172  | 11   | 70177589  | 70179385  | +    |
| 6788 | 1455391_at   | Region | Rad23a        | 19358  | 8    | 84101707  | 84107702  | -    |
| 6789 | 1440926_at   | Region | Flt1          | 14254  | 5    | 146453691 | 146617483 | -    |
| 6790 | 1422742_at   | Region | Hivep1        | 110521 | 13   | 41684912  | 41746312  | +    |
| 6791 | 1445653_at   | Region | Gsk3b         | 56637  | 16   | 36906890  | 37063968  | +    |
| 6792 | 1445134_at   | Region | Mkl2          | 239719 | 16   | 12094900  | 12148700  | +    |
| 6793 | 1440038_at   | Region | B430007K19Rik | 320708 | 9    | 43058119  | 43058802  | -    |
| 6794 | 1450874_at   | Region | Matr3         | 17184  | 18   | 35795510  | 35815074  | +    |
| 6795 | 1447299_at   | Region | None          | None   | NONE | NONE      | NONE      | NONE |
| 6796 | 1433995_s_at | Region | D16Bwg1543e   | 52910  | 16   | 26233287  | 26235466  | +    |
| 6797 | 1456983_at   | Region | Trps1         | 83925  | 15   | 50659276  | 50888038  | -    |
| 6798 | 1443258_at   | Region | Foxp1         | 108655 | 6    | 99395348  | 99630926  | -    |
| 6799 | 1420089_at   | Region | Nfkbia        | 18035  | 12   | 52210017  | 52212762  | -    |
| 6800 | 1423672_at   | Region | 2510042P03Rik | 72421  | 2    | 75633612  | 75636188  | -    |
| 6801 | 1430045_at   | Region | Tsnax         | 53424  | 8    | 124300320 | 124321515 | +    |
| 6802 | 1454612_at   | Region | Rkhd2         | 240396 | 18   | 73807650  | 73826798  | +    |
| 6803 | 1451071_a_at | Region | Atp1a1        | 11928  | 3    | 101002221 | 101030658 | -    |
| 6804 | 1442360_at   | Region | None          | None   | 5    | 130887413 | 130888910 | -    |
| 6805 | 1457009_at   | Region | Rhobtb3       | 73296  | 13   | 71926694  | 72000935  | -    |
| 6806 | 1431089_at   | Region | Cpsf2         | 51786  | 12   | 97421457  | 97450986  | +    |
| 6807 | 1444569_at   | Region | None          | None   | 4    | 8574109   | 8574599   | -    |
| 6808 | 1424291_at   | Region | Nup93         | 71805  | 8    | 93498773  | 93599238  | +    |
| 6809 | 1431173_at   | Region | A930008G19Rik | 77938  | 7    | 127078161 | 127179580 | -    |
| 6810 | 1450423_s_at | Region | Bxdc1         | 67239  | 10   | 40293133  | 40323010  | -    |
| 6811 | 1427901_at   | Region | Mrps18c       | 68735  | 5    | 99819412  | 99825120  | +    |
| 6812 | 1437077_at   | Region | AW495713      | 102323 | 8    | 12634596  | 12666770  | -    |
| 6813 | 1418856_a_at | Region | Fanca         | 14087  | 8    | 122643200 | 122693477 | -    |
| 6814 | 1420116_s_at | Region | Golph3        | 66629  | 15   | 12132755  | 12162746  | +    |
| 6815 | 1438826_x_at | Region | Calm3         | 12315  | 7    | 13866351  | 13874927  | -    |
| 6816 | 1444549_at   | Region | None          | None   | 7    | 50989210  | 50989561  | -    |
| 6817 | 1433498_at   | Region | 2010005J08Rik | 72046  | 11   | 5608972   | 5635937   | -    |
| 6818 | 1422556_at   | Region | Gna13         | 14674  | 11   | 109184029 | 109219306 | +    |
| 6819 | 1448818_at   | Region | Wnt5a         | 22418  | 14   | 26642805  | 26662537  | +    |
| 6820 | 1422985_at   | Region | Fzd1          | 14362  | 5    | 4759844   | 4763976   | -    |
| 6821 | 1455916_at   | Region | AI931714      | 102182 | 8    | 76707830  | 76793401  | +    |
| 6822 | 1440126_at   | Region | BC037704      | 269087 | 19   | 43221014  | 43221577  | +    |

|      |              |        |               |        |    |           |           |   |
|------|--------------|--------|---------------|--------|----|-----------|-----------|---|
| 6823 | 1424651_at   | Region | BC021611      | 257633 | 8  | 122162467 | 122199551 | + |
| 6824 | 1450115_at   | Region | Gnaq          | 14682  | 19 | 15357188  | 15609698  | + |
| 6825 | 1449851_at   | Region | Per1          | 18626  | 11 | 68824607  | 68835618  | + |
| 6826 | 1429012_at   | Region | Arhgef6       | 73341  | X  | 51986201  | 52093443  | - |
| 6827 | 1426246_at   | Region | Pros1         | 19128  | 16 | 61841913  | 61916636  | + |
| 6828 | 1446769_at   | Region | 2810439F02Rik | 72747  | 18 | 12831155  | 12924403  | + |
| 6829 | 1447478_at   | Region | Lrp1b         | 94217  | 2  | 40528935  | 42585760  | - |
| 6830 | 1428433_at   | Region | Hipk2         | 15258  | 6  | 38834084  | 39012133  | - |
| 6831 | 1419730_at   | Region | 4631427C17Rik | 74340  | 6  | 29815630  | 29959406  | + |
| 6832 | 1456528_x_at | Region | None          | None   | 1  | 86156796  | 86157492  | - |
| 6833 | 1433962_at   | Region | 6720458F09Rik | 328162 | 12 | 107156263 | 107162678 | + |
| 6834 | 1455688_at   | Region | LOC98434      | 98434  | 1  | 169906320 | 169907120 | - |
| 6835 | 1449988_at   | Region | Gimap1        | 16205  | 6  | 48871811  | 48876559  | + |
| 6836 | 1455755_at   | Region | Gm88          | 224813 | 17 | 43763607  | 43767237  | + |
| 6837 | 1437310_at   | Region | Bbs1          | 52028  | 19 | 4675672   | 4695428   | - |
| 6838 | 1452669_at   | Region | 2810012G03Rik | 66306  | 18 | 34982563  | 34997418  | + |
| 6839 | 1431254_at   | Region | 4930465M17Rik | 74901  | 8  | 14398719  | 14411815  | + |
| 6840 | 1429500_at   | Region | Ppm1a         | 19042  | 12 | 69630561  | 69641441  | + |
| 6841 | 1421985_a_at | Region | Eif4e2        | 26987  | 1  | 87030076  | 87054566  | + |
| 6842 | 1443356_at   | Region | None          | None   | 9  | 112232392 | 112232979 | - |
| 6843 | 1422734_a_at | Region | Myb           | 17863  | 10 | 21054488  | 21090667  | - |
| 6844 | 1424349_a_at | Region | Lpgat1        | 226856 | 1  | 191453775 | 191513698 | + |
| 6845 | 1423046_s_at | Region | Ncbp2         | 68092  | 16 | 30758010  | 30767552  | + |
| 6846 | 1447218_at   | Region | 1110003F02Rik | 68466  | 5  | 119755631 | 119756056 | + |
| 6847 | 1418321_at   | Region | Dci           | 13177  | 17 | 22230268  | 22242899  | + |
| 6848 | 1425593_at   | Region | Tnpo2         | 212999 | 8  | 84307954  | 84326395  | + |
| 6849 | 1416624_a_at | Region | Uba52         | 22186  | 8  | 69663643  | 69665714  | - |
| 6850 | 1433843_at   | Region | Hs1bp3        | 58240  | 12 | 7558840   | 7588145   | + |
| 6851 | 1444004_at   | Region | 6330441O12Rik | 331401 | X  | 36316177  | 36444623  | - |
| 6852 | 1415673_at   | Region | Psph          | 100678 | 5  | 128941432 | 128963612 | - |
| 6853 | 1441038_at   | Region | Utrn          | 22288  | 10 | 12263109  | 12646998  | - |
| 6854 | 1458450_at   | Region | Zfr           | 22763  | 15 | 11948204  | 11996199  | + |
| 6855 | 1455008_at   | Region | 6530401C20Rik | 231842 | 5  | 139722959 | 139752142 | + |
| 6856 | 1418793_at   | Region | Idua          | 15932  | 5  | 107745580 | 107760769 | + |
| 6857 | 1419140_at   | Region | Acvr2b        | 11481  | 9  | 119396762 | 119427776 | + |
| 6858 | 1453847_at   | Region | A930037O16Rik | 77971  | 6  | 25782552  | 25783712  | - |
| 6859 | 1427884_at   | Region | Col3a1        | 12825  | 1  | 45615394  | 45652804  | + |
| 6860 | 1451164_a_at | Region | Mrps18b       | 66973  | 17 | 33629538  | 33635522  | - |
| 6861 | 1436799_at   | Region | D230005D02Rik | 239188 | 14 | 71499296  | 72063839  | + |
| 6862 | 1423030_at   | Region | Vcp           | 269523 | 4  | 42895886  | 42916356  | - |
| 6863 | 1456200_at   | Region | Ipmk          | 69718  | 10 | 71401760  | 71439983  | + |
| 6864 | 1438900_at   | Region | Sacm11        | 83493  | 9  | 123553586 | 123616302 | + |
| 6865 | 1419996_s_at | Region | Arnt          | 11863  | 3  | 94936201  | 94983401  | + |
| 6866 | 1428410_at   | Region | Mak3          | 72117  | 16 | 43023139  | 43046694  | + |
| 6867 | 1449102_at   | Region | Ebf2          | 13592  | 14 | 61760384  | 61959861  | + |
| 6868 | 1417850_at   | Region | Rb1           | 19645  | 14 | 67546936  | 67677175  | - |
| 6869 | 1457713_at   | Region | Ercc5         | 22592  | 1  | 44443666  | 44477079  | + |
| 6870 | 1451159_at   | Region | Arhgef12      | 69632  | 9  | 42922812  | 43064327  | - |
| 6871 | 1424054_at   | Region | Btbd2         | 208198 | 10 | 80773518  | 80779624  | - |
| 6872 | 1424237_at   | Region | Zfp639        | 67778  | 3  | 31918770  | 31928914  | + |
| 6873 | 1424510_at   | Region | Nudt6         | 229228 | 3  | 36868582  | 36883188  | - |
| 6874 | 1439930_at   | Region | Smarca2       | 67155  | 19 | 25845226  | 26018387  | + |
| 6875 | 1419687_at   | Region | D930010J01Rik | 107227 | 19 | 6770655   | 6911902   | + |
| 6876 | 1426286_at   | Region | AF233884      | 57753  | 19 | 38132935  | 38163004  | - |
| 6877 | 1426009_a_at | Region | Pip5k1b       | 18720  | 3  | 94547426  | 94594689  | - |
| 6878 | 1440128_s_at | Region | Sez6l         | 56747  | 5  | 111489140 | 111647147 | - |
| 6879 | 1458414_at   | Region | D2Ertd93e     | 51842  | 2  | 167710860 | 167711582 | - |
| 6880 | 1423932_at   | Region | Cugbp1        | 13046  | 2  | 90645207  | 90721804  | + |
| 6881 | 1432478_a_at | Region | lbrdc3        | 75234  | 4  | 128085580 | 128112996 | + |
| 6882 | 1455790_at   | Region | E2f2          | 242705 | 4  | 135053651 | 135075971 | + |
| 6883 | 1446598_at   | Region | None          | None   | 11 | 108004702 | 108005342 | - |
| 6884 | 1430131_at   | Region | Crry          | 12946  | 1  | 194844160 | 194871942 | - |
| 6885 | 1416355_at   | Region | Rbmx          | 19655  | X  | 52141072  | 52147740  | - |
| 6886 | 1421528_a_at | Region | Surf5         | 20933  | 2  | 26837429  | 26842804  | - |
| 6887 | 1443144_at   | Region | Prkcb1        | 18751  | 7  | 116167155 | 116506625 | + |

|      |              |        |               |        |    |           |           |   |
|------|--------------|--------|---------------|--------|----|-----------|-----------|---|
| 6888 | 1428884_at   | Region | Tmem57        | 66146  | 4  | 133763662 | 133814033 | - |
| 6889 | 1452261_at   | Region | Shprh         | 268281 | 10 | 11027612  | 11087542  | + |
| 6890 | 1453649_at   | Region | C030039L03Rik | 112415 | 7  | 23049710  | 23081243  | + |
| 6891 | 1425425_a_at | Region | Wif1          | 24117  | 10 | 120617678 | 120684090 | + |
| 6892 | 1426195_a_at | Region | Cst3          | 13010  | 2  | 148328668 | 148332404 | - |
| 6893 | 1430529_at   | Region | Csnk1a1       | 93687  | 18 | 61784394  | 61817111  | + |
| 6894 | 1419264_at   | Region | 1200014M14Rik | 67463  | 13 | 92579692  | 92606895  | + |
| 6895 | 1442277_at   | Region | Chka          | 12660  | 19 | 3640704   | 3683157   | + |
| 6896 | 1425024_at   | Region | E430018J23Rik | 101604 | 7  | 121433485 | 121443350 | - |
| 6897 | 1449205_at   | Region | Zfp339        | 107586 | 2  | 143762111 | 143789016 | - |
| 6898 | 1445484_at   | Region | None          | None   | 6  | 50707092  | 50707690  | - |
| 6899 | 1452376_at   | Region | 6230401O10Rik | 72667  | 7  | 5377063   | 5384550   | + |
| 6900 | 1451748_a_at | Region | D12Ertd771e   | 52690  | 12 | 103577429 | 103650252 | - |
| 6901 | 1421826_at   | Region | Dll4          | 54485  | 2  | 118839678 | 118849505 | + |
| 6902 | 1437837_x_at | Region | Poldip3       | 73826  | 15 | 83176653  | 83200011  | - |
| 6903 | 1418760_at   | Region | Rdh11         | 17252  | 12 | 76030739  | 76048695  | - |
| 6904 | 1416075_at   | Region | Sav1          | 64010  | 12 | 66797137  | 66819163  | - |
| 6905 | 1418129_at   | Region | Dhcr24        | 74754  | 4  | 105520055 | 105545691 | + |
| 6906 | 1424301_at   | Region | Zfp219        | 69890  | 14 | 47106560  | 47120849  | - |
| 6907 | 1449269_at   | Region | F5            | 14067  | 1  | 164069551 | 164140290 | + |
| 6908 | 1427448_at   | Region | Rabep1        | 54189  | 11 | 70570583  | 70666598  | + |
| 6909 | 1452672_at   | Region | Fmip          | 107829 | 11 | 4790130   | 4823652   | + |
| 6910 | 1430077_at   | Region | Sfrs11        | 69207  | 3  | 157020040 | 157032607 | - |
| 6911 | 1446374_at   | Region | Arhgef10      | 234094 | 8  | 14307382  | 14378920  | + |
| 6912 | 1440006_at   | Region | BC026600      | 414070 | 17 | 22260152  | 22260590  | + |
| 6913 | 1452067_at   | Region | Asahl         | 67111  | 5  | 91594004  | 91613926  | - |
| 6914 | 1431033_x_at | Region | Agl           | 77559  | 3  | 115512007 | 115576987 | - |
| 6915 | 1443355_at   | Region | 1700081L11Rik | 76719  | 11 | 104154591 | 104263380 | - |
| 6916 | 1436481_at   | Region | None          | None   | 8  | 20744957  | 20745413  | - |
| 6917 | 1442890_at   | Region | Socs5         | 56468  | 17 | 84964483  | 84994389  | + |
| 6918 | 1450984_at   | Region | Tjp2          | 21873  | 19 | 23332679  | 23411932  | - |
| 6919 | 1438066_at   | Region | Gtf2b         | 229906 | 3  | 141734221 | 141752580 | + |
| 6920 | 1459644_at   | Region | AU020772      | 277939 | 7  | 94478918  | 94576823  | + |
| 6921 | 1416020_a_at | Region | Atp5g1        | 11951  | 11 | 95894073  | 95896691  | - |
| 6922 | 1437688_x_at | Region | Atp6ap2       | 70495  | X  | 10826811  | 10855905  | + |
| 6923 | 1416144_a_at | Region | Dhx15         | 13204  | 5  | 50961014  | 51001194  | - |
| 6924 | 1426705_s_at | Region | Iars          | 105148 | 13 | 49279007  | 49331120  | + |
| 6925 | 1439265_at   | Region | None          | None   | 14 | 58351896  | 58352168  | + |
| 6926 | 1457896_at   | Region | Esrrg         | 26381  | 1  | 187506691 | 187723715 | + |
| 6927 | 1437750_at   | Region | 2310037P21Rik | 72309  | 9  | 123277458 | 123278318 | - |
| 6928 | 1445128_at   | Region | None          | None   | 9  | 96967541  | 96968499  | - |
| 6929 | 1436960_at   | Region | Brd3          | 67382  | 2  | 27379952  | 27419365  | - |
| 6930 | 1453482_at   | Region | 2310024N18Rik | 69570  | 1  | 59021861  | 59022834  | + |
| 6931 | 1418789_at   | Region | Sntg2         | 268534 | 12 | 26745849  | 26946110  | - |
| 6932 | 1453893_at   | Region | 4933412O06Rik | 71071  | 13 | 15230943  | 15251910  | - |
| 6933 | 1444599_at   | Region | Herc4         | 67345  | 10 | 63208216  | 63282585  | + |
| 6934 | 1418087_at   | Region | Ufd1l         | 22230  | 16 | 17583376  | 17606305  | + |
| 6935 | 1419381_at   | Region | Terf2ip       | 57321  | 8  | 111309109 | 111318168 | + |
| 6936 | 1450023_at   | Region | Gtpbp1        | 14904  | 15 | 79743329  | 79772459  | + |
| 6937 | 1459619_at   | Region | Epb4.1l2      | 13822  | 10 | 25420347  | 25491840  | + |
| 6938 | 1454740_at   | Region | Mib1          | 225164 | 18 | 10770969  | 10857561  | + |
| 6939 | 1453166_at   | Region | D130073L02Rik | 215999 | 10 | 59411719  | 59579123  | - |
| 6940 | 1416264_at   | Region | Abcb9         | 56325  | 5  | 123233182 | 123267116 | - |
| 6941 | 1424642_at   | Region | Thoc1         | 225160 | 18 | 10003524  | 10040828  | + |
| 6942 | 1421117_at   | Region | Dst           | 13518  | 1  | 34280938  | 34577763  | + |
| 6943 | 1429050_at   | Region | Chic2         | 74277  | 5  | 73840608  | 73878810  | - |
| 6944 | 1440621_at   | Region | Kitl          | 17311  | 10 | 99997658  | 100082002 | + |
| 6945 | 1437740_at   | Region | Plekhm2       | 69582  | 4  | 140506995 | 140546160 | - |
| 6946 | 1440636_at   | Region | None          | None   | 9  | 105060109 | 105060774 | + |
| 6947 | 1451192_a_at | Region | Ttc4          | 72354  | 4  | 105621161 | 105637787 | - |
| 6948 | 1452903_at   | Region | 6230427J02Rik | 68176  | 9  | 108052213 | 108053866 | - |
| 6949 | 1451057_x_at | Region | Dnm2          | 13430  | 9  | 21313566  | 21396180  | + |
| 6950 | 1423340_at   | Region | Tcfap2b       | 21419  | 1  | 19426696  | 19452210  | + |
| 6951 | 1429760_at   | Region | Rps6ka6       | 67071  | X  | 105788074 | 105862607 | - |
| 6952 | 1430302_at   | Region | 1500041B16Rik | 380686 | 11 | 16946649  | 16947898  | + |

|      |              |        |               |        |      |           |           |      |
|------|--------------|--------|---------------|--------|------|-----------|-----------|------|
| 6953 | 1426707_at   | Region | Tubgcp3       | 259279 | 8    | 11992912  | 12050735  | -    |
| 6954 | 1441487_at   | Region | Trim2         | 80890  | 3    | 83898180  | 83960638  | -    |
| 6955 | 1453814_at   | Region | Bcl11a        | 14025  | 11   | 23972907  | 24067984  | +    |
| 6956 | 1415854_at   | Region | Kitl          | 17311  | 10   | 99997658  | 100082002 | +    |
| 6957 | 1438672_at   | Region | None          | None   | 15   | 84362823  | 84364291  | +    |
| 6958 | 1456917_at   | Region | Arfgef1       | 211673 | 1    | 10242569  | 10337781  | -    |
| 6959 | 1438658_a_at | Region | Edg3          | 13610  | 13   | 2912      | 7069      | -    |
| 6960 | 1454629_at   | Region | A930037G23Rik | 320678 | 6    | 125801418 | 125818067 | +    |
| 6961 | 1434600_at   | Region | Tjp2          | 21873  | 19   | 23332679  | 23411932  | -    |
| 6962 | 1438388_at   | Region | None          | None   | 6    | 9216488   | 9216775   | +    |
| 6963 | 1435466_at   | Region | A830091I15Rik | 237868 | 11   | 78198950  | 78223362  | -    |
| 6964 | 1417088_at   | Region | Zfp346        | 26919  | 13   | 53716348  | 53745853  | +    |
| 6965 | 1439215_at   | Region | Atp2c1        | 235574 | 9    | 105393471 | 105477208 | -    |
| 6966 | 1452580_a_at | Region | Mrpl21        | 353242 | 19   | 3071741   | 3081531   | +    |
| 6967 | 1428559_at   | Region | Fvt1          | 70750  | 1    | 106664678 | 106700512 | -    |
| 6968 | 1455456_a_at | Region | Timm50        | 66525  | 7    | 23703430  | 23709650  | -    |
| 6969 | 1425602_a_at | Region | Rabep2        | 70314  | 7    | 120479171 | 120495632 | +    |
| 6970 | 1424800_at   | Region | Enah          | 13800  | 1    | 181864370 | 181978518 | -    |
| 6971 | 1418419_at   | Region | 4632423N09Rik | 103861 | 11   | 97903641  | 97905254  | -    |
| 6972 | 1449186_at   | Region | Bag4          | 67384  | 8    | 24492266  | 24510265  | -    |
| 6973 | 1450821_at   | Region | Pcaf          | 18519  | 17   | 51101486  | 51203822  | +    |
| 6974 | 1435635_at   | Region | A030012M09Rik | 319263 | 1    | 7090301   | 7142844   | +    |
| 6975 | 1428244_at   | Region | Larp1         | 73158  | 11   | 57734518  | 57787663  | +    |
| 6976 | 1452266_at   | Region | Las1l         | 76130  | X    | 90536683  | 90558302  | -    |
| 6977 | 1443790_x_at | Region | 4930414L22Rik | 78108  | 6    | 72772296  | 72772585  | +    |
| 6978 | 1438114_x_at | Region | Efs           | 13644  | 14   | 49433145  | 49442417  | -    |
| 6979 | 1448638_at   | Region | Mtbp          | 105837 | 15   | 55562483  | 55630929  | +    |
| 6980 | 1427870_x_at | Region | Igh-4         | 16017  | 12   | 108801158 | 108801309 | -    |
| 6981 | 1452944_at   | Region | Syngn2        | 20973  | 11   | 117630759 | 117635374 | +    |
| 6982 | 1442309_at   | Region | None          | None   | NONE | NONE      | NONE      | NONE |
| 6983 | 1426986_at   | Region | 2810485I05Rik | 72826  | 9    | 13664776  | 13683571  | +    |
| 6984 | 1433580_at   | Region | Nup51         | 269113 | 5    | 91751291  | 91770868  | -    |
| 6985 | 1427190_at   | Region | 2900057D21Rik | 72993  | 14   | 25057193  | 25108756  | -    |
| 6986 | 1426922_s_at | Region | Hrb           | 15463  | 1    | 83168589  | 83225381  | +    |
| 6987 | 1440736_at   | Region | Al131651      | 98858  | 2    | 59976509  | 59977009  | -    |
| 6988 | 1451104_a_at | Region | Snrp70        | 20637  | 7    | 39452705  | 39457003  | -    |
| 6989 | 1452701_x_at | Region | Uba52         | 22186  | 8    | 69663643  | 69665714  | -    |
| 6990 | 1433463_at   | Region | 0610010K06Rik | 71678  | 1    | 10115     | 28628     | -    |
| 6991 | 1451385_at   | Region | 2310056P07Rik | 70186  | 16   | 34825251  | 34857490  | -    |
| 6992 | 1428099_a_at | Region | Sfrs1         | 110809 | 11   | 87775771  | 87779641  | +    |
| 6993 | 1416802_a_at | Region | Cdca5         | 67849  | 19   | 5873887   | 5880563   | +    |
| 6994 | 1420170_at   | Region | Myh9          | 17886  | 15   | 77812545  | 77894062  | -    |
| 6995 | 1427548_a_at | Region | Clns1a        | 12729  | 7    | 91742962  | 91765150  | +    |
| 6996 | 1450858_a_at | Region | Ube2d3        | 66105  | 3    | 134321860 | 134350243 | +    |
| 6997 | 1416813_at   | Region | Tia1          | 21841  | 6    | 86837265  | 86854216  | +    |
| 6998 | 1448292_at   | Region | Uqcr          | 66594  | 10   | 80533820  | 80537651  | -    |
| 6999 | 1435224_at   | Region | Crebbp        | 12914  | 16   | 3754292   | 3755973   | -    |
| 7000 | 1435909_at   | Region | C030034I22Rik | 77533  | 17   | 67192735  | 67218840  | -    |
| 7001 | 1427051_at   | Region | Tnks1bp1      | 228140 | 2    | 84745922  | 84770797  | +    |
| 7002 | 1423553_at   | Region | Dnajb3        | 15504  | 1    | 88023840  | 88024853  | -    |
| 7003 | 1448072_at   | Region | None          | None   | 6    | 125378004 | 125378711 | +    |
| 7004 | 1443084_at   | Region | Ctso          | 229445 | 3    | 81661676  | 81685785  | +    |
| 7005 | 1451605_at   | Region | Dyx1c1        | 67685  | 9    | 73091351  | 73105809  | +    |
| 7006 | 1423356_at   | Region | Snap29        | 67474  | 16   | 16177019  | 16203795  | +    |
| 7007 | 1458586_at   | Region | Al849286      | 269966 | 7    | 96277205  | 96277799  | -    |
| 7008 | 1440238_at   | Region | None          | None   | 7    | 21778388  | 21778923  | -    |
| 7009 | 1443963_at   | Region | Fmr2          | 14266  | X    | 64028927  | 64536633  | +    |
| 7010 | 1446793_at   | Region | None          | None   | 12   | 7534887   | 7535438   | +    |
| 7011 | 1443640_at   | Region | None          | None   | NONE | NONE      | NONE      | NONE |
| 7012 | 1418810_at   | Region | Crhr1         | 12921  | 11   | 103954131 | 103996611 | +    |
| 7013 | 1420819_at   | Region | Sla           | 20491  | 15   | 66806690  | 66825714  | -    |
| 7014 | 1418649_at   | Region | Egln3         | 112407 | 12   | 50934400  | 50959266  | -    |
| 7015 | 1436605_at   | Region | Tkt           | 21881  | 14   | 28683743  | 28709316  | +    |
| 7016 | 1445880_at   | Region | C030036D22Rik | 77607  | NONE | NONE      | NONE      | NONE |
| 7017 | 1428290_at   | Region | Mipep         | 70478  | 14   | 55319724  | 55440621  | +    |

|      |              |        |                   |        |      |           |           |      |
|------|--------------|--------|-------------------|--------|------|-----------|-----------|------|
| 7018 | 1454163_at   | Region | 5730420D15Rik     | 70523  | 10   | 49278     | 60632     | -    |
| 7019 | 1438508_at   | Region | None              | None   | 18   | 35003585  | 35003888  | +    |
| 7020 | 1416874_a_at | Region | 5730511K23Rik     | 54624  | 7    | 23798598  | 23804984  | +    |
| 7021 | 1417643_at   | Region | Tsga2             | 22092  | 17   | 29064786  | 29085171  | -    |
| 7022 | 1441971_at   | Region | None              | None   | 2    | 104531780 | 104532569 | -    |
| 7023 | 1434832_at   | Region | Foxo3a            | 56484  | 10   | 42292466  | 42383422  | -    |
| 7024 | 1424309_a_at | Region | Mocs2             | 17434  | 13   | 111232567 | 111243010 | +    |
|      |              |        | Hspa8 ///         |        |      |           |           |      |
|      |              |        | LOC432883 ///     |        |      |           |           |      |
| 7025 | 1455789_x_at | Region | LOC545316         | 15481  | 9    | 40751958  | 40756793  | +    |
| 7026 | 1435303_at   | Region | Taf4b             | 72504  | 18   | 14971506  | 15086389  | +    |
| 7027 | 1453573_at   | Region | Hist1h3d          | 319149 | 13   | 23055870  | 23056280  | +    |
| 7028 | 1434768_at   | Region | Cln2              | 12751  | 7    | 99859499  | 99866859  | -    |
| 7029 | 1442593_at   | Region | None              | None   | 12   | 37719408  | 37720082  | +    |
| 7030 | 1447300_at   | Region | AW551984          | 244810 | 9    | 39530212  | 39546940  | -    |
| 7031 | 1458345_s_at | Region | Colec11           | 71693  | 12   | 25159743  | 25188570  | -    |
| 7032 | 1416738_at   | Region | Brap              | 72399  | 5    | 120815393 | 120837810 | +    |
| 7033 | 1424908_at   | Region | Mtfmt             | 69606  | 9    | 65558047  | 65574667  | +    |
| 7034 | 1426691_at   | Region | Tjp4              | 74094  | 17   | 43767797  | 43792935  | -    |
| 7035 | 1423384_s_at | Region | Tex261            | 21766  | 6    | 84114647  | 84119990  | -    |
| 7036 | 1416188_at   | Region | Gm2a              | 14667  | 11   | 54850958  | 54863739  | +    |
| 7037 | 1444058_at   | Region | 2310047C04Rik     | 224170 | 16   | 47767664  | 47835780  | -    |
| 7038 | 1451641_at   | Region | Dbr1              | 83703  | 9    | 99476600  | 99485145  | +    |
| 7039 | 1451754_a_at | Region | Wdr45             | 54636  | X    | 5961189   | 5967141   | +    |
| 7040 | 1421178_at   | Region | 9130411I17Rik     | 67569  | 10   | 102288141 | 102304017 | +    |
| 7041 | 1433918_at   | Region | Atg4dl            | 235040 | 9    | 21151564  | 21160633  | +    |
| 7042 | 1424290_at   | Region | BC010311          | 209212 | 4    | 15924086  | 15940842  | -    |
| 7043 | 1447234_s_at | Region | Snx6              | 72183  | 12   | 0         | 675       | -    |
| 7044 | 1454213_at   | Region | 4930438O05Rik     | 78795  | 1    | 85961103  | 86084595  | +    |
| 7045 | 1438459_x_at | Region | Sfpq              | 71514  | 4    | 126048448 | 126057909 | +    |
| 7046 | 1424839_a_at | Region | 2810405F18Rik     | 72181  | 4    | 114991747 | 115012781 | -    |
| 7047 | 1448020_at   | Region | Rap1a             | 109905 | 3    | 105524111 | 105597165 | -    |
| 7048 | 1420307_a_at | Region | Pitpnb            | 56305  | 5    | 110380456 | 110438052 | +    |
| 7049 | 1435282_at   | Region | Gm967             | 381217 | 19   | 23211527  | 23268980  | -    |
| 7050 | 1436120_at   | Region | None              | None   | 14   | 53937157  | 53944677  | -    |
| 7051 | 1434611_at   | Region | Rnf123            | 84585  | 9    | 108119827 | 108143707 | -    |
| 7052 | 1458167_at   | Region | Kcnd2             | 16508  | 6    | 21263145  | 21776841  | +    |
| 7053 | 1440387_at   | Region | ---               | 434626 | NONE | NONE      | NONE      | NONE |
| 7054 | 1444717_at   | Region | Zwint             | 52696  | 10   | 72709781  | 72729831  | +    |
|      |              |        | ICRFP703B1614Q5   |        |      |           |           |      |
| 7055 | 1450959_at   | Region | .6                | 57373  | 7    | 103556608 | 103565052 | +    |
| 7056 | 1458185_at   | Region | Thap4             | 67026  | 1    | 93532881  | 93578284  | -    |
| 7057 | 1417647_at   | Region | Snx5              | 69178  | 2    | 143707062 | 143727467 | -    |
| 7058 | 1460550_at   | Region | Mttr11            | 194126 | 3    | 95649869  | 95659546  | +    |
| 7059 | 1419132_at   | Region | Tlr2              | 24088  | 3    | 83572215  | 83577710  | -    |
| 7060 | 1455780_at   | Region | 4932418K24Rik     | 237930 | 11   | 95953110  | 95986538  | +    |
|      |              |        | LOC224870 ///     |        |      |           |           |      |
|      |              |        | Phgdh ///         |        |      |           |           |      |
|      |              |        | LOC269242 ///     |        |      |           |           |      |
|      |              |        | LOC383450 ///     |        |      |           |           |      |
|      |              |        | LOC434173 ///     |        |      |           |           |      |
| 7061 | 1456584_x_at | Region | LOC546010         | 224870 | 17   | 50730422  | 50732759  | +    |
|      |              |        | 5430432N15Rik /// |        |      |           |           |      |
| 7062 | 1431836_x_at | Region | AW743872          | 101899 | 7    | 39723120  | 39728912  | +    |
| 7063 | 1429394_at   | Region | A130010J15Rik     | 319266 | 1    | 192912406 | 192915067 | +    |
| 7064 | 1430287_s_at | Region | Hemk1             | 69536  | 9    | 107393488 | 107404076 | -    |
| 7065 | 1424183_at   | Region | Acat1             | 110446 | 9    | 53644099  | 53673628  | -    |
| 7066 | 1424921_at   | Region | Bst2              | 69550  | 8    | 70683434  | 70686579  | -    |
| 7067 | 1417303_at   | Region | Mvd               | 192156 | 8    | 121815191 | 121824977 | -    |
| 7068 | 1431428_a_at | Region | Nosip             | 66394  | 7    | 39139035  | 39153958  | +    |
| 7069 | 1416317_a_at | Region | Stambp            | 70527  | 6    | 83887437  | 83916666  | -    |
| 7070 | 1424192_at   | Region | 1500011H22Rik     | 68948  | 5    | 121516936 | 121524705 | -    |
| 7071 | 1426740_s_at | Region | Armc5             | 233912 | 7    | 122287167 | 122294910 | +    |
| 7072 | 1441229_at   | Region | D230019N24Rik     | 399607 | 10   | 63259865  | 63260423  | +    |
| 7073 | 1423409_a_at | Region | 2500003M10Rik     | 66511  | 3    | 90309771  | 90320256  | -    |



|      |              |        |               |        |    |           |           |   |
|------|--------------|--------|---------------|--------|----|-----------|-----------|---|
| 7074 | 1420526_at   | Region | Dcbl2         | 73379  | 16 | 57413972  | 57455222  | + |
| 7075 | 1457034_at   | Region | D14Abb1e      | 218850 | 14 | 25576551  | 25619645  | + |
| 7076 | 1424359_at   | Region | Oplah         | 75475  | 15 | 76344528  | 76355172  | - |
| 7077 | 1441742_at   | Region | 6430546I09    | 238271 | 12 | 71750845  | 72033694  | - |
| 7078 | 1417107_at   | Region | Tpd52I2       | 66314  | 2  | 181214210 | 181233714 | + |
| 7079 | 1434599_a_at | Region | Tjp2          | 21873  | 19 | 23332679  | 23411932  | - |
| 7080 | 1418127_a_at | Region | Pdcd8         | 26926  | X  | 42995740  | 43034222  | - |
| 7081 | 1436209_at   | Region | Dnajc16       | 214063 | 4  | 140643259 | 140671905 | - |
| 7082 | 1455671_at   | Region | Commd8        | 27784  | 5  | 70938206  | 70949389  | - |
| 7083 | 1453016_at   | Region | 2900042B11Rik | 72938  | 4  | 106212803 | 106238837 | + |
| 7084 | 1434913_at   | Region | Hmgcl1        | 208982 | 9  | 76153103  | 76274476  | + |
| 7085 | 1434579_x_at | Region | Ndufs8        | 225887 | 19 | 3697661   | 3701550   | - |
| 7086 | 1441049_at   | Region | Kcna6         | 16494  | 6  | 127379948 | 127411808 | - |
| 7087 | 1459433_at   | Region | C130051F05Rik | 320348 | 13 | 74177838  | 74178470  | + |
| 7088 | 1456927_at   | Region | Mast2         | 17776  | 4  | 115265667 | 115422753 | - |
| 7089 | 1455434_a_at | Region | Ktn1          | 16709  | 14 | 42751248  | 42824049  | + |
| 7090 | 1430764_at   | Region | 1700023F06Rik | 69441  | 11 | 103019929 | 103021175 | - |
| 7091 | 1426395_s_at | Region | Eif3s1        | 78655  | 2  | 121561316 | 121567484 | + |
| 7092 | 1436016_x_at | Region | Gdi3          | 14569  | 13 | 3422528   | 3450201   | + |
| 7093 | 1421356_at   | Region | Tex9          | 21778  | 9  | 72593752  | 72624808  | - |
| 7094 | 1456514_at   | Region | Rbm16         | 106583 | 17 | 3065810   | 3160145   | + |
| 7095 | 1416793_at   | Region | Arl6ip2       | 56298  | 17 | 77665786  | 77673524  | - |
| 7096 | 1431201_at   | Region | Slc25a27      | 74011  | 17 | 41143342  | 41168531  | - |
| 7097 | 1447908_x_at | Region | Ttc3          | 22129  | 16 | 93778128  | 93866771  | + |
| 7098 | 1443902_at   | Region | 6430573F11Rik | 319582 | 8  | 35293919  | 35317741  | + |
| 7099 | 1455644_at   | Region | 3100002B05Rik | 68299  | 11 | 75771884  | 75905288  | - |
| 7100 | 1435140_at   | Region | Ide           | 15925  | 19 | 36613620  | 36677821  | - |
| 7101 | 1437378_x_at | Region | Scarb1        | 20778  | 5  | 124438866 | 124503358 | - |
| 7102 | 1457027_at   | Region | Dhtkd1        | 209692 | 2  | 5813387   | 5860053   | - |
| 7103 | 1435233_at   | Region | Ncoa2         | 17978  | 1  | 13272503  | 13507008  | - |
| 7104 | 1434604_at   | Region | Eif5b         | 226982 | 1  | 38328500  | 38347645  | + |
| 7105 | 1458882_at   | Region | Serpnb8       | 20725  | 1  | 107578943 | 107597781 | + |
| 7106 | 1443934_at   | Region | 9230110C19Rik | 234912 | 9  | 8027636   | 8048787   | - |
| 7107 | 1419374_at   | Region | Wbp4          | 22380  | 14 | 73815794  | 73835161  | - |
| 7108 | 1452889_at   | Region | 2310007H09Rik | 76429  | 7  | 126976517 | 127072441 | + |
| 7109 | 1425746_at   | Region | D730039F16Rik | 77996  | 2  | 34806598  | 34824295  | + |
| 7110 | 1423959_at   | Region | Ropn1l        | 252967 | 15 | 31441819  | 31454253  | - |
| 7111 | 1440972_at   | Region | Nsd1          | 18193  | 13 | 53842763  | 53849719  | + |
| 7112 | 1460085_at   | Region | None          | None   | 1  | 136481330 | 136481881 | + |
| 7113 | 1428453_at   | Region | 4930487N19Rik | 70646  | 14 | 44261607  | 44280316  | + |
| 7114 | 1443430_at   | Region | Cradd         | 12905  | 10 | 95150586  | 95300324  | - |
| 7115 | 1458624_at   | Region | LOC380843     | 380843 | 13 | 46016804  | 46028743  | + |
| 7116 | 1452740_at   | Region | Myh10         | 77579  | 11 | 68417625  | 68542200  | + |

Myl6 /// LOC432856

/// LOC433297 ///

|      |              |        |               |        |    |           |           |   |
|------|--------------|--------|---------------|--------|----|-----------|-----------|---|
| 7117 | 1424269_a_at | Region | LOC546126     | 17904  | 10 | 128227888 | 128230852 | - |
| 7118 | 1446288_at   | Region | C78692        | 97148  | 4  | 119825806 | 119826139 | - |
| 7119 | 1424205_at   | Region | Smarca5       | 93762  | 8  | 79911951  | 79951467  | - |
| 7120 | 1428225_s_at | Region | Hnrpdl        | 50926  | 5  | 99053360  | 99057516  | - |
| 7121 | 1418876_at   | Region | Foxd1         | 15229  | 13 | 94542754  | 94545191  | + |
| 7122 | 1442066_at   | Region | C530028O21Rik | 319352 | 6  | 125652724 | 125659098 | + |
| 7123 | 1456998_at   | Region | Dbpht2        | 386753 | 12 | 71155249  | 71156206  | + |
| 7124 | 1456811_at   | Region | Cxxc4         | 319478 | 3  | 133121396 | 133143674 | + |
| 7125 | 1457028_at   | Region | A430033K04    | 243308 | 5  | 137594368 | 137620231 | + |
| 7126 | 1416580_a_at | Region | Stub1         | 56424  | 17 | 23636797  | 23639522  | - |
| 7127 | 1452748_at   | Region | Xrcc3         | 74335  | 12 | 107284533 | 107295382 | - |
|      |              |        | Psarl ///     |        |    |           |           |   |
| 7128 | 1433478_at   | Region | LOC383654     | 381038 | 16 | 19051435  | 19073977  | - |
| 7129 | 1428871_at   | Region | 4121402D02Rik | 74026  | 11 | 98616603  | 98627514  | + |
| 7130 | 1423742_at   | Region | Rbm10         | 236732 | X  | 18858936  | 18889829  | + |
| 7131 | 1452152_at   | Region | Al642036      | 216705 | 11 | 45594714  | 45663462  | + |
| 7132 | 1454938_at   | Region | Snx13         | 217463 | 12 | 31759593  | 31761148  | + |
| 7133 | 1452926_at   | Region | Ttc14         | 67120  | 3  | 33243957  | 33251783  | + |
| 7134 | 1417893_at   | Region | Sfxn3         | 94280  | 19 | 44592080  | 44600788  | + |

|      |              |        |               |        |    |           |           |   |
|------|--------------|--------|---------------|--------|----|-----------|-----------|---|
| 7135 | 1460728_s_at | Region | Ing4          | 28019  | 6  | 125695852 | 125705268 | + |
| 7136 | 1435481_at   | Region | Zfp653        | 319601 | 9  | 21946165  | 21962759  | - |
| 7137 | 1458941_at   | Region | D130016B08Rik | 319524 | 2  | 44940594  | 44941248  | - |
| 7138 | 1449350_at   | Region | Osr1          | 23967  | 12 | 8890186   | 8896599   | + |
| 7139 | 1452451_at   | Region | MGI:1929597   | 65115  | 8  | 103464769 | 103513458 | + |
| 7140 | 1429487_at   | Region | Ppp1r12a      | 17931  | 10 | 108049328 | 108167253 | + |
| 7141 | 1434361_at   | Region | E130307J07Rik | 235406 | 9  | 57030694  | 57040389  | - |
| 7142 | 1451094_at   | Region | Ggtl3         | 207182 | 2  | 154947322 | 154971764 | - |
| 7143 | 1431175_at   | Region | 1810019D21Rik | 69771  | 8  | 105432613 | 105434567 | + |
| 7144 | 1425531_at   | Region | Znhit1        | 70103  | 5  | 135995323 | 136001004 | - |
| 7145 | 1428296_at   | Region | Polr2l        | 66491  | 7  | 135874755 | 135877129 | - |
| 7146 | 1418573_a_at | Region | Raly          | 19383  | 2  | 154248094 | 154324181 | + |
| 7147 | 1443707_at   | Region | 2900046B09Rik | 74327  | 9  | 36785709  | 36785967  | + |
| 7148 | 1436861_at   | Region | Ii7           | 16196  | 3  | 7546649   | 7587999   | - |
| 7149 | 1421874_a_at | Region | Mrps23        | 64656  | 11 | 87932410  | 87939499  | + |
| 7150 | 1424465_at   | Region | Al413631      | 381045 | 16 | 34857660  | 34877238  | + |
| 7151 | 1415720_s_at | Region | Mad2l1bp      | 66591  | 17 | 43657310  | 43663457  | - |
| 7152 | 1441608_at   | Region | None          | None   |    | 67051729  | 67052352  | - |
| 7153 | 1443836_x_at | Region | Wdr48         | 67561  | 9  | 119904848 | 119936532 | + |
| 7154 | 1436882_at   | Region | Ubl5          | 66177  | 9  | 20514222  | 20517693  | + |
| 7155 | 1429976_at   | Region | Clasp2        | 76499  | 9  | 113865413 | 113971281 | + |
| 7156 | 1431830_at   | Region | 4632409L22Rik | 67230  | 7  | 10799782  | 10812533  | - |
| 7157 | 1423799_at   | Region | Sui1-rs1      | 20918  | 11 | 100141081 | 100143183 | + |
| 7158 | 1451271_a_at | Region | Acat1         | 110446 | 9  | 53644099  | 53673628  | - |
| 7159 | 1425108_a_at | Region | BC004728      | 207818 | 15 | 100678898 | 100694279 | - |
| 7160 | 1429668_at   | Region | E130119J07Rik | 78006  | 14 | 99005077  | 99007471  | - |
| 7161 | 1444273_at   | Region | AW555355      | 99413  | 2  | 90272998  | 90274123  | - |
| 7162 | 1436057_at   | Region | Gtl2          | 17263  | 12 | 105023823 | 105039917 | + |
| 7163 | 1435931_at   | Region | None          | None   | 4  | 59668259  | 59669843  | + |
| 7164 | 1452281_at   | Region | Sos2          | 20663  | 12 | 66415427  | 66507784  | - |
| 7165 | 1424121_at   | Region | Commd1        | 17846  | 11 | 22794554  | 22873786  | - |
| 7166 | 1444312_at   | Region | 4930477M19    | 242126 | 3  | 101284848 | 101322324 | - |
| 7167 | 1459154_at   | Region | Eya3          | 14050  | 4  | 131599945 | 131685662 | + |
| 7168 | 1447822_x_at | Region | 2700038N03Rik | 70240  | 5  | 136245535 | 136246530 | + |
| 7169 | 1434307_at   | Region | 9630015D15Rik | 100201 | 4  | 15192785  | 15212331  | + |
| 7170 | 1443981_at   | Region | LOC544892     | 544892 | 12 | 105954467 | 105960875 | - |
| 7171 | 1444349_at   | Region | None          | None   | 15 | 96372348  | 96373090  | + |
| 7172 | 1452101_at   | Region | Blmh          | 104184 | 11 | 76671417  | 76713035  | + |
| 7173 | 1448875_at   | Region | Zhx1          | 22770  | 15 | 58056024  | 58078371  | - |
| 7174 | 1423891_at   | Region | Gstt3         | 103140 | 10 | 75875862  | 75883154  | - |
| 7175 | 1426804_at   | Region | Smarca4       | 20586  | 9  | 21522528  | 21593154  | + |
| 7176 | 1426366_at   | Region | Eif2c2        | 239528 | 15 | 73133858  | 73173566  | - |
| 7177 | 1456999_at   | Region | 2510001I10Rik | 74781  | 5  | 141637713 | 141677424 | + |
| 7178 | 1450151_at   | Region | Zfp316        | 54201  | 5  | 142310603 | 142328821 | - |
| 7179 | 1434896_at   | Region | MGI:3028594   | 77652  | 17 | 30988427  | 31006091  | + |
| 7180 | 1418436_at   | Region | Stx7          | 53331  | 10 | 24123924  | 24163523  | + |
| 7181 | 1447820_x_at | Region | Cpt2          | 12896  | 4  | 106862887 | 106882439 | - |
| 7182 | 1428421_a_at | Region | 2700085E05Rik | 67201  | 11 | 75947168  | 75969314  | - |
| 7183 | 1438681_at   | Region | None          | None   | 12 | 84570510  | 84571205  | + |
| 7184 | 1419067_a_at | Region | Rabgef1       | 56715  | 5  | 129357005 | 129384162 | + |
| 7185 | 1452899_at   | Region | Rian          | 75745  | X  | 59165199  | 59166522  | + |
| 7186 | 1424703_at   | Region | Hemk1         | 69536  | 9  | 107393488 | 107404076 | - |
| 7187 | 1416628_at   | Region | 0610006I08Rik | 66836  | 19 | 7967543   | 7969022   | + |
| 7188 | 1439695_a_at | Region | Mphosph1      | 240641 | 19 | 34265710  | 34319122  | + |
| 7189 | 1429068_at   | Region | 2810488G03Rik | 72842  | 6  | 8482382   | 8484485   | - |
| 7190 | 1427439_s_at | Region | Skb1          | 27374  | 14 | 49025095  | 49035051  | - |
| 7191 | 1451678_at   | Region | 4430402O11Rik | 67608  | 11 | 121058346 | 121076948 | + |
| 7192 | 1458060_at   | Region | None          | None   | 4  | 133702458 | 133703156 | - |
| 7193 | 1423239_at   | Region | Impdh1        | 23917  | 6  | 29247537  | 29259368  | - |
| 7194 | 1438843_x_at | Region | Mtch2         | 56428  | 2  | 90551904  | 90571383  | + |
| 7195 | 1451496_at   | Region | Mtss1         | 211401 | 15 | 58954404  | 59092928  | - |
| 7196 | 1451272_a_at | Region | 2510010F15Rik | 67921  | 1  | 91073608  | 91108966  | + |
| 7197 | 1449878_a_at | Region | Slc12a6       | 107723 | 2  | 111890057 | 111986394 | + |
| 7198 | 1417008_at   | Region | Crat          | 12908  | 2  | 30334148  | 30347622  | - |
| 7199 | 1439349_at   | Region | Stno          | 216161 | 10 | 80180244  | 80225913  | - |

|      |              |        |               |        |      |           |           |      |
|------|--------------|--------|---------------|--------|------|-----------|-----------|------|
| 7200 | 1442411_at   | Region | Glcci1        | 170772 | 6    | 8234651   | 8573400   | +    |
| 7201 | 1418593_at   | Region | Taf6          | 21343  | 5    | 137151434 | 137157311 | -    |
| 7202 | 1425523_at   | Region | 2600011C06Rik | 67039  | 12   | 80506670  | 80547102  | +    |
| 7203 | 1440701_at   | Region | None          | None   | 5    | 75947446  | 75948048  | +    |
| 7204 | 1434104_at   | Region | 6030458H05    | 270066 | 8    | 71632032  | 71642844  | -    |
| 7205 | 1424872_at   | Region | 2310001H12Rik | 69504  | 5    | 109003198 | 109009422 | +    |
| 7206 | 1453134_at   | Region | Pik3ca        | 18706  | 3    | 31844384  | 31871009  | +    |
|      |              |        | Slc25a5 ///   |        |      |           |           |      |
|      |              |        | LOC383528 /// |        |      |           |           |      |
|      |              |        | LOC433326 /// |        |      |           |           |      |
|      |              |        | LOC433923 /// |        |      |           |           |      |
| 7207 | 1438546_x_at | Region | LOC545025     | 11740  | X    | 31416206  | 31419360  | +    |
| 7208 | 1418873_at   | Region | Sfxn4         | 94281  | 19   | 60439150  | 60461769  | -    |
|      |              |        | Slc25a5 ///   |        |      |           |           |      |
| 7209 | 1438922_x_at | Region | LOC433326     | 11740  | X    | 31416206  | 31419360  | +    |
| 7210 | 1437458_x_at | Region | Clu           | 12759  | 14   | 60496045  | 60508968  | +    |
| 7211 | 1417187_at   | Region | Hip2          | 53323  | 5    | 64339100  | 64400757  | +    |
| 7212 | 1447947_at   | Region | Zfyve16       | 218441 | 13   | 88655606  | 88698984  | -    |
| 7213 | 1426429_at   | Region | Thap7         | 69009  | 16   | 16298950  | 16302020  | -    |
| 7214 | 1456668_at   | Region | Zcchc11       | 230594 | 4    | 107418943 | 107518318 | +    |
| 7215 | 1450112_a_at | Region | Gas2          | 14453  | 7    | 46048672  | 46163985  | +    |
| 7216 | 1445933_at   | Region | None          | None   | 14   | 16847716  | 16848416  | -    |
| 7217 | 1456761_at   | Region | D630030B22Rik | 53963  | NONE | NONE      | NONE      | NONE |
| 7218 | 1439958_at   | Region | LOC546257     | 546257 | 12   | 84514431  | 84514898  | -    |
| 7219 | 1455049_at   | Region | Igsf3         | 78908  | 3    | 100804224 | 100886780 | +    |
| 7220 | 1427124_at   | Region | Stk35         | 67333  | 2    | 129314605 | 129341840 | +    |
| 7221 | 1451834_at   | Region | Cacnb1        | 12295  | 11   | 97823988  | 97904149  | -    |
| 7222 | 1426532_at   | Region | Zmynd11       | 66505  | 13   | 9669934   | 9749340   | -    |
| 7223 | 1448083_at   | Region | A930012M17    | 268777 | 14   | 117843742 | 117864796 | -    |
| 7224 | 1444085_at   | Region | 5430420P03Rik | 71365  | 10   | 43327846  | 43546962  | +    |
| 7225 | 1443746_x_at | Region | Dmp1          | 13406  | 5    | 103238499 | 103249944 | +    |
| 7226 | 1424460_s_at | Region | BC005662      | 210992 | 13   | 69524486  | 69573696  | +    |
| 7227 | 1438005_at   | Region | B230315F11Rik | 319653 | 5    | 8429484   | 8466624   | +    |
| 7228 | 1455673_at   | Region | AU016977      | 231642 | 5    | 113234577 | 113238864 | -    |
| 7229 | 1455542_at   | Region | C630043F03Rik | 68285  | 4    | 71292437  | 71294029  | +    |
| 7230 | 1455035_s_at | Region | Nol5a         | 67134  | 2    | 129788312 | 129793166 | +    |
| 7231 | 1455032_at   | Region | 9630037P07Rik | 227210 | 1    | 64989291  | 65019720  | +    |
| 7232 | 1437862_at   | Region | 2600011C06Rik | 67039  | 12   | 80506670  | 80547102  | +    |
| 7233 | 1428464_at   | Region | Ndufa3        | 66091  | 7    | 1492      | 4280      | +    |
| 7234 | 1448263_a_at | Region | Cndp2         | 66054  | 18   | 84835201  | 84853374  | -    |
| 7235 | 1426330_at   | Region | Cacng5        | 140723 | 11   | 107695694 | 107732451 | -    |
| 7236 | 1420857_at   | Region | Lancl2        | 71835  | 6    | 57865048  | 57900894  | +    |
| 7237 | 1440446_at   | Region | Nkd1          | 93960  | 8    | 87806676  | 87877632  | +    |
| 7238 | 1441510_at   | Region | Rhof          | 23912  | 5    | 122256437 | 122285538 | -    |
| 7239 | 1425009_at   | Region | Tcte2         | 21646  | 17   | 11774717  | 11823520  | -    |
| 7240 | 1428389_s_at | Region | Wdr43         | 72515  | 17   | 69392451  | 69435728  | +    |
| 7241 | 1428110_x_at | Region | Vps11         | 71732  | 9    | 44336960  | 44350525  | -    |
| 7242 | 1432435_s_at | Region | C030004A17Rik | 109229 | 9    | 35131009  | 35181307  | -    |
| 7243 | 1428905_at   | Region | Rraga         | 68441  | 4    | 85561878  | 85563477  | +    |
| 7244 | 1423811_at   | Region | Sf3a3         | 75062  | 4    | 123741889 | 123759573 | +    |
| 7245 | 1441327_a_at | Region | Ssr1          | 107513 | 13   | 37516882  | 37533029  | -    |
| 7246 | 1438991_x_at | Region | Ppp2r1a       | 51792  | 17   | 18817271  | 18837722  | +    |
| 7247 | 1419125_at   | Region | Ptpn18        | 19253  | 1    | 34729261  | 34743287  | +    |
| 7248 | 1459920_at   | Region | None          | None   | 12   | 29986273  | 29987153  | +    |
| 7249 | 1435480_at   | Region | Braf          | 109880 | 6    | 39749542  | 39860924  | -    |
| 7250 | 1452869_at   | Region | Prpf38b       | 66921  | 3    | 108698549 | 108707446 | -    |
| 7251 | 1416635_at   | Region | Smpdl3a       | 57319  | 10   | 58060696  | 58077885  | +    |
| 7252 | 1438580_at   | Region | 4930572I07Rik | 319885 | 4    | 44672569  | 44825209  | +    |
| 7253 | 1436464_at   | Region | None          | None   | 1    | 189885431 | 189932179 | +    |
| 7254 | 1426925_at   | Region | Mnab          | 319817 | 2    | 37306963  | 37355065  | -    |
| 7255 | 1416323_at   | Region | 2410004N11Rik | 66989  | 17   | 26754605  | 26771684  | +    |
| 7256 | 1456712_at   | Region | A830039H10Rik | 209707 | 5    | 44458346  | 44613918  | -    |
| 7257 | 1417368_s_at | Region | Ndufa2        | 17991  | 18   | 36966131  | 36968313  | -    |
| 7258 | 1421005_at   | Region | Cep1          | 26920  | 2    | 35064394  | 35110984  | +    |
| 7259 | 1424116_x_at | Region | Ppp5c         | 19060  | 7    | 13955563  | 13978781  | -    |

|      |              |        |               |        |    |           |           |   |
|------|--------------|--------|---------------|--------|----|-----------|-----------|---|
| 7260 | 1441960_x_at | Region | 5730494M16Rik | 66648  | 18 | 25367107  | 25397117  | - |
| 7261 | 1426828_at   | Region | 1300018I17Rik | 72325  | 8  | 122617239 | 122629245 | - |
| 7262 | 1416623_at   | Region | Thbs3         | 21827  | 3  | 88971680  | 88983291  | + |
| 7263 | 1443349_at   | Region | Dock10        | 210293 | 1  | 80833085  | 80997044  | - |
| 7264 | 1418229_s_at | Region | Hirip5        | 56748  | 6  | 87443967  | 87462532  | + |
| 7265 | 1417457_at   | Region | Cks2          | 66197  | 13 | 50199009  | 50204338  | + |
| 7266 | 1446880_at   | Region | None          | None   | 10 | 8813595   | 8814186   | - |
| 7267 | 1426272_at   | Region | Lmbr1         | 56873  | 5  | 27683542  | 27828674  | - |
| 7268 | 1436761_s_at | Region | 1200015N20Rik | 71721  | 10 | 70495074  | 70612698  | + |
| 7269 | 1418591_at   | Region | Dnaja4        | 58233  | 9  | 54817109  | 54833863  | + |
| 7270 | 1451177_at   | Region | Dnajb4        | 67035  | 3  | 151165498 | 151191485 | - |
| 7271 | 1457261_at   | Region | A930025H08Rik | 77807  | 13 | 27889490  | 27890232  | - |
| 7272 | 1434708_at   | Region | Vhlh          | 22346  | 6  | 114191852 | 114199465 | + |
| 7273 | 1433515_s_at | Region | Etnk1         | 75320  | 6  | 144013618 | 144053017 | + |
| 7274 | 1427321_s_at | Region | Cxadr         | 13052  | 16 | 77387226  | 77445217  | + |
| 7275 | 1445395_at   | Region | Al875142      | 103885 | 11 | 108092142 | 108092743 | - |
| 7276 | 1448031_at   | Region | AW050213      | 102284 | 8  | 93243919  | 93244864  | + |
| 7277 | 1452933_at   | Region | Ankrd39       | 109346 | 1  | 36832764  | 36841792  | - |
| 7278 | 1439689_at   | Region | 9030224M15Rik | 327747 | 10 | 40761991  | 40889750  | + |
| 7279 | 1442934_at   | Region | C81608        | 97314  | 6  | 91238881  | 91239799  | - |
| 7280 | 1417535_at   | Region | Fbxo25        | 66822  | 8  | 13286421  | 13319136  | + |
| 7281 | 1418526_at   | Region | Fusip1        | 14105  | 4  | 134737416 | 134751165 | + |
| 7282 | 1443705_at   | Region | D14Ertd171e   | 238988 | 14 | 25761526  | 26615037  | + |
| 7283 | 1425466_at   | Region | Senp2         | 75826  | 16 | 20782192  | 20820660  | + |
| 7284 | 1417941_at   | Region | Hdhd4         | 67311  | 2  | 150486633 | 150496291 | - |

LOC432458 ///  
LOC432468 ///  
LOC432469 ///  
LOC432527 ///  
LOC432783 ///  
LOC432784 ///  
LOC432804 ///  
LOC432823 ///  
LOC432857 ///  
LOC432890 ///  
LOC432932 ///  
LOC433038 ///  
LOC433041 ///  
LOC433042 ///  
LOC433154 ///  
LOC433156 ///  
LOC433244 ///

|      |              |        |                   |        |    |           |           |   |
|------|--------------|--------|-------------------|--------|----|-----------|-----------|---|
| 7285 | 1424608_a_at | Region | LOC433285 /// LOC | 432458 | 10 | 47488094  | 47490071  | - |
| 7286 | 1442399_at   | Region | Xrn1              | 24127  | 9  | 95858413  | 95956167  | + |
| 7287 | 1422254_a_at | Region | Dyrk1b            | 13549  | 7  | 23575246  | 23582675  | + |
| 7288 | 1440218_at   | Region | BC040758          | 268663 | 13 | 53328471  | 53347805  | + |
| 7289 | 1439092_at   | Region | Nxf1              | 53319  | 19 | 7953650   | 7967457   | + |
| 7290 | 1452146_a_at | Region | Cox15             | 226139 | 19 | 43279531  | 43297387  | - |
| 7291 | 1424195_a_at | Region | Inpp5d            | 16331  | 1  | 87436767  | 87537073  | + |
| 7292 | 1445766_at   | Region | Ppfia2            | 327814 | 10 | 106357920 | 106820120 | + |
| 7293 | 1438623_x_at | Region | Rbx1              | 56438  | 15 | 81517173  | 81527164  | + |
| 7294 | 1438191_a_at | Region | Rnf40             | 233900 | 7  | 121638515 | 121653317 | + |
| 7295 | 1451518_at   | Region | BC021921          | 236193 | 8  | 2346      | 7667      | + |
| 7296 | 1422119_at   | Region | Rab5b             | 19344  | 10 | 128414967 | 128433354 | - |
| 7297 | 1427240_at   | Region | Dock6             | 67539  | 9  | 21693020  | 21737604  | - |
| 7298 | 1455395_at   | Region | 4933425A18Rik     | 71147  | 14 | 14735221  | 14746504  | - |
| 7299 | 1451076_s_at | Region | Ga17              | 98221  | 2  | 104704410 | 104721781 | - |
| 7300 | 1455943_at   | Region | Zfp451            | 98403  | 1  | 34030702  | 34083136  | - |
| 7301 | 1448345_at   | Region | Tomm34            | 67145  | 2  | 163510510 | 163528071 | - |
| 7302 | 1422736_at   | Region | Ranbp9            | 56705  | 13 | 42965819  | 43043413  | - |
| 7303 | 1421965_s_at | Region | Notch3            | 18131  | 17 | 29928825  | 29975691  | - |
| 7304 | 1416911_a_at | Region | 6330407G11Rik     | 68050  | 4  | 122762469 | 122777457 | - |
| 7305 | 1454051_at   | Region | 2600011E07Rik     | 72125  | 14 | 54913220  | 54915871  | + |
| 7306 | 1446272_at   | Region | Pctk2             | 237459 | 10 | 93180223  | 93239410  | + |

|      |              |        |               |        |      |           |           |      |
|------|--------------|--------|---------------|--------|------|-----------|-----------|------|
| 7307 | 1428955_x_at | Region | Slc9a3r2      | 65962  | 17   | 22442873  | 22453949  | -    |
| 7308 | 1424333_at   | Region | Rg9mtd1       | 52575  | 16   | 54929659  | 54933715  | -    |
| 7309 | 1421611_at   | Region | AB041806      | 58213  | 4    | 137276459 | 137278961 | +    |
| 7310 | 1417749_a_at | Region | Tjp1          | 21872  | 7    | 59180206  | 59255462  | -    |
| 7311 | 1438602_s_at | Region | Masp1         | 17174  | 16   | 22233196  | 22304246  | -    |
| 7312 | 1454464_at   | Region | 2700078F05Rik | 72626  | 1    | 181910788 | 181912233 | +    |
| 7313 | 1453334_at   | Region | B230216N24Rik | 78603  | 1    | 97811078  | 97827715  | -    |
| 7314 | 1450704_at   | Region | lhh           | 16147  | 1    | 75249527  | 75255860  | -    |
| 7315 | 1433747_at   | Region | 2010309L07Rik | 66485  | 17   | 15385299  | 15387122  | -    |
| 7316 | 1436086_at   | Region | 4921526F01Rik | 385668 | 16   | 95596843  | 95628432  | -    |
| 7317 | 1431450_at   | Region | 4930444P10Rik | 75799  | 1    | 16244204  | 16276731  | -    |
| 7318 | 1434142_at   | Region | Ppm1d         | 53892  | 11   | 85039246  | 85075058  | +    |
| 7319 | 1442745_x_at | Region | C79248        | 96982  | 2    | 155626396 | 155626710 | -    |
| 7320 | 1417792_at   | Region | Zfml          | 18139  | 6    | 84261646  | 84334988  | +    |
| 7321 | 1446297_at   | Region | Hibadh        | 58875  | 6    | 52690560  | 52784625  | -    |
| 7322 | 1423380_s_at | Region | Nfatc4        | 73181  | 14   | 50343024  | 50351959  | +    |
| 7323 | 1442258_at   | Region | None          | None   | 8    | 85949367  | 85950034  | +    |
| 7324 | 1427496_at   | Region | Al851464      | 99100  | 2    | 125076943 | 125138966 | -    |
| 7325 | 1440471_x_at | Region | Waspik        | 215280 | 2    | 73127366  | 73227159  | -    |
| 7326 | 1441988_at   | Region | Ppm1k         | 243382 | 6    | 57667241  | 57693162  | -    |
| 7327 | 1433742_at   | Region | Ankrd15       | 107351 | 19   | 24649338  | 24674526  | +    |
| 7328 | 1459847_x_at | Region | None          | None   | 14   | 65295090  | 65295338  | +    |
| 7329 | 1442821_at   | Region | Smbp          | 107358 | 19   | 40758164  | 40808343  | -    |
| 7330 | 1436722_a_at | Region | Actb          | 11461  | 5    | 141967352 | 141970960 | -    |
| 7331 | 1438768_at   | Region | None          | None   | 1    | 83284292  | 83285120  | -    |
| 7332 | 1416170_at   | Region | Trap1         | 68015  | 16   | 3711543   | 3749386   | -    |
| 7333 | 1433104_at   | Region | 5730412F04Rik | 70483  | 9    | 35471945  | 35473316  | +    |
| 7334 | 1437379_x_at | Region | Trap1         | 68015  | 16   | 3711543   | 3749386   | -    |
| 7335 | 1434420_x_at | Region | Tomm22        | 223696 | 15   | 79723188  | 79725182  | +    |
| 7336 | 1444178_at   | Region | LOC433237     | 433237 | 19   | 28317234  | 28322100  | +    |
| 7337 | 1427397_at   | Region | 2810046L04Rik | 212127 | 3    | 53098037  | 53115975  | +    |
| 7338 | 1418159_at   | Region | Tcfcp2        | 21422  | 15   | 100560334 | 100609485 | +    |
| 7339 | 1419815_at   | Region | D14Erdt209e   | 52535  | 14   | 46985534  | 46986284  | +    |
| 7340 | 1447869_x_at | Region | Rhobtb3       | 73296  | 13   | 71926694  | 72000935  | -    |
| 7341 | 1423071_x_at | Region | 6720475J19Rik | 68157  | NONE | NONE      | NONE      | NONE |
| 7342 | 1448351_at   | Region | Coro1b        | 23789  | 19   | 3937450   | 3942825   | +    |
| 7343 | 1448581_at   | Region | Zfp346        | 26919  | 13   | 53716348  | 53745853  | +    |
| 7344 | 1453243_at   | Region | 0610030E20Rik | 68364  | 6    | 72679317  | 72685122  | +    |
| 7345 | 1452804_at   | Region | 1700010A17Rik | 75495  | 2    | 35981635  | 36011871  | +    |
| 7346 | 1428661_at   | Region | Nfkbil2       | 72749  | 15   | 76677119  | 76690793  | -    |
| 7347 | 1435504_at   | Region | Rsnl2         | 78785  | 17   | 69558453  | 69633262  | +    |
| 7348 | 1418648_at   | Region | Egln3         | 112407 | 12   | 50934400  | 50959266  | -    |
| 7349 | 1423253_at   | Region | Mpz           | 17528  | 1    | 171079553 | 171089962 | +    |
| 7350 | 1452399_at   | Region | Rgs6          | 50779  | 12   | 79477666  | 80021017  | +    |
| 7351 | 1424751_at   | Region | Abt1          | 30946  | 13   | 22898425  | 22903930  | -    |
| 7352 | 1436032_at   | Region | None          | None   | 1    | 181195800 | 181196168 | +    |
| 7353 | 1416195_at   | Region | MGI:1194899   | 19062  | 11   | 75356678  | 75374523  | +    |
| 7354 | 1440531_at   | Region | Rbm11         | 224344 | 16   | 74674504  | 74683522  | +    |
| 7355 | 1440935_at   | Region | Grb10         | 14783  | 11   | 11828255  | 11865408  | -    |
| 7356 | 1438205_at   | Region | 1110014N23Rik | 68505  | 19   | 5858871   | 5865993   | -    |
| 7357 | 1416461_at   | Region | Gpiap1        | 53872  | 2    | 103469773 | 103502351 | -    |
| 7358 | 1443899_at   | Region | BC028799      | 213473 | 9    | 87536273  | 87546897  | -    |
| 7359 | 1416934_at   | Region | Mtm1          | 17772  | X    | 65883573  | 65983756  | +    |
| 7360 | 1453119_at   | Region | Otud1         | 71198  | 2    | 19697585  | 19889760  | +    |
| 7361 | 1456865_x_at | Region | Rrs1          | 59014  | 1    | 9650211   | 9652221   | +    |
| 7362 | 1441918_x_at | Region | LOC435350     | 435350 | 13   | 33364069  | 33372760  | -    |
| 7363 | 1424145_at   | Region | Prr3          | 75210  | 17   | 33691562  | 33699257  | -    |
| 7364 | 1426703_at   | Region | Gak           | 231580 | 5    | 107645627 | 107705954 | -    |
| 7365 | 1435097_at   | Region | Mmab          | 77697  | 5    | 113541603 | 113554596 | -    |
| 7366 | 1418381_at   | Region | Zfp148        | 22661  | 16   | 32188918  | 32308456  | +    |
| 7367 | 1426384_a_at | Region | Ywhae         | 22627  | 11   | 75458597  | 75491496  | +    |
| 7368 | 1448770_a_at | Region | Atpif1        | 11983  | 4    | 131491458 | 131494544 | -    |
| 7369 | 1429446_at   | Region | Sdccag1       | 66244  | 12   | 66143332  | 66188963  | -    |
| 7370 | 1423087_a_at | Region | 1110002E23Rik | 66119  | 17   | 45205200  | 45206846  | -    |
| 7371 | 1417670_at   | Region | Timm44        | 21856  | 8    | 3614696   | 3630853   | -    |

|      |              |        |               |        |    |           |           |   |
|------|--------------|--------|---------------|--------|----|-----------|-----------|---|
| 7372 | 1450212_at   | Region | Fmnl1         | 57778  | 11 | 102992486 | 103019315 | + |
| 7373 | 1454955_at   | Region | Ipo7          | 233726 | 7  | 103871296 | 103907985 | + |
| 7374 | 1423807_a_at | Region | Calm2         | 12314  | 17 | 85290221  | 85303654  | - |
| 7375 | 1420652_at   | Region | Ate1          | 11907  | 7  | 124514765 | 124642811 | - |
| 7376 | 1437146_x_at | Region | Coro7         | 78885  | 16 | 4297661   | 4351229   | - |
| 7377 | 1449451_at   | Region | Serpinb11     | 66957  | 1  | 107351186 | 107369347 | + |
| 7378 | 1445283_at   | Region | None          | None   | 2  | 96275041  | 96275719  | + |
| 7379 | 1454909_at   | Region | Tacc1         | 320165 | 8  | 23877518  | 23925420  | - |
| 7380 | 1418361_at   | Region | Gas8          | 104346 | 8  | 122891361 | 122910698 | + |
| 7381 | 1445323_at   | Region | MGI:2149712   | 268527 | 12 | 16037980  | 16123596  | - |
| 7382 | 1418724_at   | Region | Cfi           | 12630  | 3  | 128769608 | 128808203 | + |
| 7383 | 1444177_at   | Region | None          | None   | 1  | 153298267 | 153298859 | - |
| 7384 | 1434126_at   | Region | 4930402H24Rik | 228602 | 2  | 130221684 | 130353963 | - |
| 7385 | 1435747_at   | Region | Fgf14         | 14169  | 14 | 118506813 | 118721824 | - |
| 7386 | 1418344_at   | Region | Tmem8         | 60455  | 17 | 23906487  | 23916424  | + |
| 7387 | 1425552_at   | Region | Hip1r         | 29816  | 5  | 123144623 | 123174525 | + |
| 7388 | 1441813_at   | Region | None          | None   | 5  | 96014299  | 96014531  | - |
| 7389 | 1452940_x_at | Region | Pitpnc1       | 71795  | 11 | 107033195 | 107291788 | - |
| 7390 | 1444328_at   | Region | Clta          | 12757  | 4  | 43928606  | 43948768  | + |
| 7391 | 1459302_at   | Region | A030007N12Rik | 109237 | 15 | 102138906 | 102139535 | + |
| 7392 | 1447114_x_at | Region | 4930414L22Rik | 78108  | 6  | 72772131  | 72772585  | + |
| 7393 | 1419081_at   | Region | Atg10l        | 66795  | 13 | 87068126  | 87173332  | - |
|      |              |        | BC003993 ///  |        |    |           |           |   |
|      |              |        | LOC432468 /// |        |    |           |           |   |
|      |              |        | LOC432512 /// |        |    |           |           |   |
|      |              |        | LOC432823 /// |        |    |           |           |   |
|      |              |        | LOC432857 /// |        |    |           |           |   |
|      |              |        | LOC432890 /// |        |    |           |           |   |
|      |              |        | LOC432924 /// |        |    |           |           |   |
|      |              |        | LOC432932 /// |        |    |           |           |   |
|      |              |        | LOC433043 /// |        |    |           |           |   |
|      |              |        | LOC433244 /// |        |    |           |           |   |
|      |              |        | LOC433340 /// |        |    |           |           |   |
|      |              |        | LOC433373 /// |        |    |           |           |   |
|      |              |        | LOC433596 /// |        |    |           |           |   |
|      |              |        | LOC433657 /// |        |    |           |           |   |
|      |              |        | LOC433893 /// |        |    |           |           |   |
|      |              |        | LOC433915 /// |        |    |           |           |   |
|      |              |        | LOC434014 /// |        |    |           |           |   |
|      |              |        | LOC434071 /// |        |    |           |           |   |
| 7394 | 1424609_a_at | Region | LOC4          | 432468 | 10 | 66312437  | 66314332  | + |
| 7395 | 1424913_at   | Region | 2310044G17Rik | 217732 | 12 | 83821045  | 83837587  | + |
| 7396 | 1449013_at   | Region | Eef2k         | 13631  | 7  | 114718450 | 114779568 | + |
| 7397 | 1431806_at   | Region | 4931408D14Rik | 77059  | 19 | 36601644  | 36607149  | - |
| 7398 | 1435194_at   | Region | Hspa4         | 15525  | 11 | 53014415  | 53053230  | - |
| 7399 | 1458711_at   | Region | None          | None   | 15 | 101291534 | 101292103 | + |
| 7400 | 1456828_at   | Region | C030023E24Rik | 320247 | X  | 55862069  | 55862762  | + |
| 7401 | 1436582_at   | Region | None          | None   | X  | 99138334  | 99139054  | - |
| 7402 | 1434044_at   | Region | Repin1        | 58887  | 6  | 48726819  | 48731963  | + |
| 7403 | 1454697_at   | Region | Tloc1         | 69276  | 3  | 30204876  | 30231459  | + |
| 7404 | 1426254_at   | Region | Tm2d1         | 94043  | 4  | 97330443  | 97358338  | - |
| 7405 | 1446507_at   | Region | None          | None   | 4  | 41591437  | 41591913  | - |
| 7406 | 1416522_a_at | Region | Grcc10        | 14790  | 6  | 125394709 | 125396685 | - |
| 7407 | 1421107_at   | Region | Stk4          | 58231  | 2  | 163531147 | 163612490 | + |
| 7408 | 1450172_at   | Region | Pknx1         | 18771  | 17 | 29391575  | 29415568  | + |
| 7409 | 1446294_at   | Region | Tcf12         | 21406  | 9  | 71980605  | 72246476  | - |
| 7410 | 1439516_at   | Region | 2610201A13Rik | 70434  | 11 | 33045296  | 33045960  | - |
| 7411 | 1420744_at   | Region | Chrn2         | 11444  | 3  | 89559631  | 89570768  | - |
| 7412 | 1452901_at   | Region | 3526402H21Rik | 66683  | 1  | 64893251  | 64897055  | + |
| 7413 | 1429248_at   | Region | 2810002N01Rik | 68020  | 12 | 107191903 | 107212849 | + |
| 7414 | 1423766_at   | Region | Pak1ip1       | 68083  | 13 | 40561850  | 40573601  | + |
| 7415 | 1424211_at   | Region | 5730438N18Rik | 70556  | 4  | 148236837 | 148266549 | - |
| 7416 | 1420705_at   | Region | Foxb1         | 64290  | 9  | 69888791  | 69891882  | - |
| 7417 | 1443770_x_at | Region | None          | None   | 5  | 130720592 | 130720893 | - |
| 7418 | 1425424_at   | Region | None          | None   | 6  | 141243512 | 141245799 | + |

|      |              |        |               |        |      |           |           |      |
|------|--------------|--------|---------------|--------|------|-----------|-----------|------|
| 7419 | 1441738_at   | Region | None          | None   | NONE | NONE      | NONE      | NONE |
| 7420 | 1438753_at   | Region | Porcn         | 53627  | X    | 6432790   | 6445447   | -    |
| 7421 | 1445089_at   | Region | D16ErtD778e   | 52714  | NONE | NONE      | NONE      | NONE |
| 7422 | 1424003_at   | Region | 4930444A02Rik | 74653  | 8    | 24705353  | 24718870  | -    |
| 7423 | 1441768_at   | Region | 9430051O21Rik | 77339  | 4    | 79917608  | 79917958  | +    |
| 7424 | 1447228_at   | Region | Zfp289        | 77038  | 2    | 90970055  | 90981680  | +    |
| 7425 | 1422518_at   | Region | Cask          | 12361  | X    | 11759987  | 12085496  | -    |
| 7426 | 1435801_at   | Region | Fcmd          | 246179 | 4    | 53635886  | 53679150  | +    |
| 7427 | 1427639_a_at | Region | Nek4          | 23955  | 14   | 29083439  | 29119352  | +    |
| 7428 | 1446850_at   | Region | Ppap2b        | 67916  | 4    | 104116265 | 104190062 | +    |
| 7429 | 1436232_a_at | Region | Gabpb1        | 14391  | 2    | 126142766 | 126189340 | -    |
| 7430 | 1429156_at   | Region | 2610036L11Rik | 66311  | 10   | 30232476  | 30408425  | -    |
| 7431 | 1454233_at   | Region | 2310006M14Rik | 76422  | 1    | 136028546 | 136054934 | -    |
| 7432 | 1428019_at   | Region | 4932425I24Rik | 320214 | 16   | 37114992  | 37159933  | -    |
| 7433 | 1416177_at   | Region | Rbmxrt        | 19656  | 14   | 40378978  | 40380600  | +    |
| 7434 | 1450189_at   | Region | Xkh           | 22439  | X    | 7511854   | 7550113   | +    |
| 7435 | 1422575_at   | Region | Mxd4          | 17122  | 5    | 32664918  | 32676048  | -    |
| 7436 | 1426913_at   | Region | Lss           | 16987  | 10   | 76632617  | 76654924  | +    |
| 7437 | 1430791_at   | Region | 6330415B21Rik | 70753  | 6    | 77730464  | 77732574  | -    |
| 7438 | 1426576_at   | Region | Tmem23        | 208449 | 19   | 31448202  | 31573509  | -    |
| 7439 | 1448929_at   | Region | F13a1         | 74145  | 13   | 36407592  | 36590165  | -    |
| 7440 | 1423315_at   | Region | Bbc3          | 170770 | 7    | 1582      | 5761      | +    |
| 7441 | 1447962_at   | Region | None          | None   | 15   | 36798410  | 36799070  | +    |
| 7442 | 1439901_at   | Region | 2610208M17Rik | 108909 | 8    | 3442132   | 3444816   | +    |
| 7443 | 1453980_at   | Region | 5330434G04Rik | 78269  | X    | 99990916  | 99993138  | -    |
| 7444 | 1456021_at   | Region | Atf6          | 226641 | 1    | 170641954 | 170802508 | -    |
| 7445 | 1454625_at   | Region | Phf6          | 70998  | X    | 47433062  | 47477739  | +    |
| 7446 | 1431222_at   | Region | Tiam2         | 24001  | 17   | 3358883   | 3481083   | +    |
| 7447 | 1443302_at   | Region | 6720403M19Rik | 320619 | 6    | 146699973 | 146700622 | +    |
| 7448 | 1421646_a_at | Region | Pias3         | 229615 | 3    | 96184305  | 96193798  | +    |
| 7449 | 1438972_x_at | Region | 2810410L24Rik | 76377  | 11   | 120006436 | 120007769 | +    |
| 7450 | 1418534_at   | Region | Fzd2          | 57265  | 11   | 102425622 | 102427671 | +    |
| 7451 | 1430151_at   | Region | Nisch         | 64652  | 14   | 29302768  | 29323388  | -    |
|      |              |        | Gm1103 ///    |        |      |           |           |      |
| 7452 | 1434901_at   | Region | LOC544682     | 381990 | 10   | 125154233 | 125161026 | +    |
| 7453 | 1428542_at   | Region | 2010003J03Rik | 69860  | 19   | 5155603   | 5160301   | +    |
| 7454 | 1446080_at   | Region | Cutl2         | 13048  | 5    | 121012566 | 121200175 | -    |
| 7455 | 1442237_at   | Region | Sqstm1        | 18412  | 11   | 49952993  | 49963631  | -    |
| 7456 | 1436478_at   | Region | 1810013L24Rik | 69053  | 16   | 8502119   | 8528217   | +    |
| 7457 | 1436241_s_at | Region | Hira          | 15260  | 16   | 17647800  | 17741359  | +    |
| 7458 | 1424366_at   | Region | Tmem15        | 227697 | 2    | 30216424  | 30218241  | -    |
| 7459 | 1430526_a_at | Region | Smarca2       | 67155  | 19   | 25845226  | 26018387  | +    |
| 7460 | 1438056_x_at | Region | Abcc5         | 27416  | 16   | 19102921  | 19197967  | -    |
| 7461 | 1416163_at   | Region | Cops4         | 26891  | 5    | 99537083  | 99566415  | +    |
| 7462 | 1450413_at   | Region | Pdgfb         | 18591  | 15   | 80048194  | 80067128  | -    |
| 7463 | 1438789_s_at | Region | Dpysl3        | 22240  | 18   | 43544269  | 43613318  | -    |
| 7464 | 1423653_at   | Region | Atp1a1        | 11928  | 3    | 101002221 | 101030658 | -    |
| 7465 | 1448705_at   | Region | Zfp297        | 81630  | 17   | 31620251  | 31623277  | +    |
| 7466 | 1458738_at   | Region | Gna14         | 14675  | 19   | 15659862  | 15834920  | +    |
| 7467 | 1455103_at   | Region | Ddx46         | 212880 | 13   | 54296789  | 54297817  | +    |
| 7468 | 1429521_at   | Region | 4930562C03Rik | 67667  | 9    | 3286376   | 3289860   | +    |
| 7469 | 1421855_at   | Region | Fgl2          | 14190  | 5    | 19824807  | 19830476  | +    |
| 7470 | 1418013_at   | Region | Cml1          | 66116  | 6    | 86339786  | 86345291  | -    |
| 7471 | 1424928_at   | Region | LOC545983     | 545983 | 7    | 92685157  | 92692326  | -    |
| 7472 | 1443157_at   | Region | None          | None   | 19   | 27872963  | 27873268  | -    |
| 7473 | 1438583_at   | Region | Ern1          | 78943  | 11   | 106218709 | 106308885 | -    |
| 7474 | 1433754_at   | Region | Mbnl2         | 105559 | 14   | 114846670 | 115003029 | +    |
| 7475 | 1447995_x_at | Region | 1700026B20Rik | 69434  | 12   | 100474801 | 100476412 | -    |
| 7476 | 1452321_at   | Region | Brwd1         | 93871  | 16   | 95429851  | 95519830  | -    |
| 7477 | 1425497_a_at | Region | Prpf4b        | 19134  | 13   | 34407672  | 34435208  | +    |
| 7478 | 1456825_at   | Region | Wdr33         | 74320  | 18   | 32067429  | 32147139  | +    |
| 7479 | 1460129_at   | Region | Slc6a2        | 20538  | 8    | 92248264  | 92288701  | +    |
| 7480 | 1449176_a_at | Region | Dck           | 13178  | 5    | 88030861  | 88049111  | +    |
| 7481 | 1420823_at   | Region | Sema4d        | 20354  | 13   | 50254932  | 50347328  | -    |
| 7482 | 1453209_at   | Region | Brf1          | 72308  | 12   | 108436225 | 108439583 | -    |

|      |              |        |               |        |    |           |           |   |
|------|--------------|--------|---------------|--------|----|-----------|-----------|---|
| 7483 | 1449785_at   | Region | AA414993      | 103569 | 11 | 59561235  | 59561500  | - |
| 7484 | 1445492_at   | Region | Mapre2        | 212307 | 18 | 24032480  | 24122349  | + |
| 7485 | 1459360_at   | Region | Sp3           | 20687  | 2  | 72634943  | 72710690  | - |
| 7486 | 1450612_a_at | Region | Pemt          | 18618  | 11 | 59696259  | 59762481  | - |
| 7487 | 1438242_at   | Region | Usp40         | 227334 | 1  | 87765405  | 87827652  | - |
| 7488 | 1453282_at   | Region | Cxadr         | 13052  | 16 | 77387226  | 77445217  | + |
| 7489 | 1434311_at   | Region | Cnot6l        | 231464 | 5  | 95087917  | 95179605  | - |
| 7490 | 1454028_at   | Region | 4931402H11Rik | 70963  | 3  | 87971300  | 87976201  | - |
| 7491 | 1436746_at   | Region | Prkwnk1       | 232341 | 6  | 120356763 | 120470204 | - |
| 7492 | 1431712_a_at | Region | 2310022A10Rik | 66367  | 7  | 22928910  | 22956812  | + |
| 7493 | 1420110_s_at | Region | Zfp334        | 228876 | 2  | 164834169 | 164844992 | - |
| 7494 | 1455685_at   | Region | 9530064J02    | 330631 | 7  | 106205812 | 106208818 | + |
| 7495 | 1416574_at   | Region | 5730589K01Rik | 268741 | 14 | 47379749  | 47394617  | + |
| 7496 | 1452517_at   | Region | Plekhh1       | 211945 | 12 | 75867965  | 75938050  | + |
| 7497 | 1428483_a_at | Region | None          | None   | 16 | 89876353  | 89884308  | - |
| 7498 | 1454746_at   | Region | Plekhl1       | 353047 | 11 | 103186181 | 103233753 | - |
| 7499 | 1429086_at   | Region | Tcfcp2l3      | 252973 | 15 | 37236160  | 37368500  | + |
| 7500 | 1437838_x_at | Region | Grsf1         | 231413 | 5  | 87925715  | 87942166  | - |
| 7501 | 1431774_a_at | Region | 4930404J24Rik | 73919  | 7  | 113771859 | 113792317 | + |
| 7502 | 1436085_at   | Region | Zbtb34        | 241311 | 2  | 33338273  | 33363486  | - |
| 7503 | 1424503_at   | Region | Rab22a        | 19334  | 2  | 173120334 | 173165145 | + |
| 7504 | 1433807_at   | Region | 6720463M24Rik | 77744  | 14 | 93570533  | 93598212  | + |
| 7505 | 1455886_at   | Region | Cbl           | 12402  | 9  | 44140278  | 44222839  | - |
| 7506 | 1427008_at   | Region | 4732452J19Rik | 207742 | 11 | 87427889  | 87463530  | + |
| 7507 | 1460436_at   | Region | Ndst1         | 15531  | 18 | 60911289  | 60938715  | - |
| 7508 | 1443624_at   | Region | BC013481      | 245945 | 5  | 2381      | 11024     | + |
| 7509 | 1434843_at   | Region | A430041B07Rik | 328108 | 12 | 61743753  | 61801012  | + |
| 7510 | 1439539_at   | Region | Tram2         | 170829 | 1  | 21226321  | 21304168  | - |
| 7511 | 1423458_at   | Region | Slc35a5       | 74102  | 16 | 44022615  | 44041681  | - |
| 7512 | 1426089_a_at | Region | BC003331      | 226499 | 1  | 150199242 | 150227115 | - |
| 7513 | 1428927_at   | Region | Shq1          | 72171  | 6  | 101047039 | 101145097 | - |
| 7514 | 1424027_at   | Region | Pxn           | 19303  | 5  | 114657142 | 114667534 | + |
| 7515 | 1446383_at   | Region | Efna5         | 13640  | 17 | 60297708  | 60574961  | - |
| 7516 | 1438383_x_at | Region | Ppp2r1a       | 51792  | 17 | 18817271  | 18837722  | + |
| 7517 | 1434300_at   | Region | 2610101N10Rik | 67958  | 9  | 95369771  | 95420790  | - |
| 7518 | 1443745_s_at | Region | Dmp1          | 13406  | 5  | 103238499 | 103249944 | + |
| 7519 | 1418660_at   | Region | Clock         | 12753  | 5  | 75457416  | 75549787  | - |
| 7520 | 1450966_at   | Region | Crot          | 74114  | 5  | 8972791   | 9003889   | - |
| 7521 | 1447568_at   | Region | None          | None   | 5  | 114446249 | 114446563 | + |
| 7522 | 1424110_a_at | Region | Nme1          | 18102  | 11 | 93780012  | 93789608  | - |
| 7523 | 1434128_a_at | Region | Zfp574        | 232976 | 7  | 20255177  | 20260374  | + |
| 7524 | 1428136_at   | Region | Sfrp1         | 20377  | 8  | 22166110  | 22202536  | + |
| 7525 | 1420635_a_at | Region | Tcirg1        | 27060  | 19 | 3684843   | 3694020   | - |
| 7526 | 1449403_at   | Region | Pde9a         | 18585  | 17 | 29194101  | 29286091  | + |
| 7527 | 1458398_at   | Region | 1700027F06Rik | 72268  | 6  | 124975959 | 124976196 | - |
| 7528 | 1458459_a_at | Region | AI452102      | 330594 | 7  | 84020274  | 84040181  | + |
| 7529 | 1442603_at   | Region | Pb1           | 76748  | 14 | 29191861  | 29192436  | + |
| 7530 | 1442670_at   | Region | 6430517E21Rik | 240843 | 1  | 158150731 | 158260041 | - |
| 7531 | 1440168_x_at | Region | Kctd7         | 212919 | 5  | 129314713 | 129325633 | + |
| 7532 | 1453147_at   | Region | Polr3e        | 26939  | 7  | 114793384 | 114821816 | + |
| 7533 | 1428067_at   | Region | Rasl12        | 70784  | 9  | 65520753  | 65534971  | + |
| 7534 | 1429197_s_at | Region | Rabgap1l      | 29809  | 1  | 160161852 | 160697585 | - |
| 7535 | 1448930_at   | Region | 3010026O09Rik | 68067  | 11 | 49927692  | 49952950  | + |
| 7536 | 1420813_at   | Region | Hdac7a        | 56233  | 15 | 97868326  | 97887406  | - |
| 7537 | 1435864_a_at | Region | 1810063B05Rik | 67892  | 8  | 125710414 | 125713320 | + |
| 7538 | 1454086_a_at | Region | Lmo2          | 16909  | 2  | 103674977 | 103686628 | + |
| 7539 | 1450013_at   | Region | 2900073G15Rik | 67268  | 17 | 68765368  | 68773934  | - |
| 7540 | 1453350_at   | Region | 2010005J08Rik | 72046  | 11 | 5608972   | 5635937   | - |
| 7541 | 1418428_at   | Region | Kif5b         | 16573  | 18 | 6245790   | 6284051   | - |
| 7542 | 1422558_at   | Region | Gamt          | 14431  | 10 | 80383108  | 80385921  | - |
| 7543 | 1419212_at   | Region | Icosl         | 50723  | 10 | 78178359  | 78188516  | + |
| 7544 | 1443518_at   | Region | Sgce          | 20392  | 6  | 4627235   | 4699984   | - |
| 7545 | 1445101_at   | Region | None          | None   | 10 | 67203600  | 67204298  | + |
| 7546 | 1432007_s_at | Region | Ap2a2         | 11772  | 7  | 135965073 | 136035847 | + |
| 7547 | 1455086_at   | Region | Uchl5         | 56207  | 1  | 143609398 | 143638878 | + |



|      |              |        |                   |        |      |           |           |      |
|------|--------------|--------|-------------------|--------|------|-----------|-----------|------|
| 7548 | 1453796_a_at | Region | 1200009B18Rik     | 67456  | 6    | 149113867 | 149145859 | -    |
| 7549 | 1445866_at   | Region | Mast4             | 328329 | 13   | 98930827  | 99546711  | -    |
|      |              |        | 1300018I05Rik /// |        |      |           |           |      |
| 7550 | 1451082_at   | Region | LOC445272         | 445272 | 17   | 27470394  | 27513279  | +    |
| 7551 | 1427113_s_at | Region | 2700049H19Rik     | 109008 | 2    | 128607662 | 128610132 | +    |
| 7552 | 1434715_at   | Region | 1600014C10Rik     | 72244  | 7    | 33351336  | 33365081  | +    |
| 7553 | 1447471_at   | Region | None              | None   | NONE | NONE      | NONE      | NONE |
| 7554 | 1449413_at   | Region | Mpv17l            | 93734  | 16   | 12676558  | 12685220  | +    |
| 7555 | 1429585_s_at | Region | Mynn              | 80732  | 3    | 30012186  | 30028739  | +    |
| 7556 | 1436734_at   | Region | E130309F12Rik     | 272031 | 4    | 48975384  | 49256135  | +    |
| 7557 | 1423797_at   | Region | Aacs              | 78894  | 5    | 124642786 | 124684316 | +    |
| 7558 | 1460464_at   | Region | 2700089E24Rik     | 381820 | 6    | 133875346 | 133882217 | +    |
| 7559 | 1437797_at   | Region | D5Wsu150e         | 28023  | 5    | 121649873 | 121650200 | -    |
| 7560 | 1437115_at   | Region | AA673488          | 101471 | 7    | 135633236 | 135664738 | +    |
| 7561 | 1424055_at   | Region | Ncoa5             | 228869 | 2    | 164457090 | 164491512 | -    |
| 7562 | 1423505_at   | Region | Tagln             | 21345  | 9    | 45942880  | 45949150  | -    |
| 7563 | 1438783_at   | Region | Tmepai            | 65112  | 2    | 172688256 | 172737000 | -    |
| 7564 | 1421894_a_at | Region | Tpp2              | 22019  | 1    | 44229826  | 44298790  | +    |
| 7565 | 1439251_at   | Region | Idua              | 15932  | 5    | 107745580 | 107760769 | +    |
| 7566 | 1449886_a_at | Region | Timm10            | 30056  | 12   | 67958182  | 67971658  | -    |
| 7567 | 1438438_at   | Region | 2900002H16Rik     | 75695  | 5    | 123664423 | 123702734 | -    |
| 7568 | 1433209_at   | Region | 2210017G18Rik     | 70386  | 6    | 4872511   | 4873706   | +    |
| 7569 | 1429351_at   | Region | 4930429H24Rik     | 75785  | 16   | 18869169  | 18899359  | +    |
| 7570 | 1437644_at   | Region | B3galt2           | 26878  | 1    | 143472806 | 143481893 | +    |
| 7571 | 1457306_at   | Region | Pole3             | 59001  | 4    | 61614989  | 61616205  | -    |
| 7572 | 1451007_at   | Region | Cnm2              | 94219  | 19   | 46312725  | 46429008  | +    |
| 7573 | 1432410_a_at | Region | Bmp7              | 12162  | 2    | 172330153 | 172400760 | -    |
| 7574 | 1459409_at   | Region | D130073L02Rik     | 215999 | 10   | 59411719  | 59579123  | -    |
| 7575 | 1425814_a_at | Region | Calcrl            | 54598  | 2    | 84028375  | 84074736  | -    |
| 7576 | 1434823_x_at | Region | 1110002M09Rik     | 66915  | 1    | 92464648  | 92469431  | -    |
| 7577 | 1441652_at   | Region | Bmpr2             | 12168  | 1    | 60068175  | 60174399  | +    |
| 7578 | 1430557_at   | Region | 4930434J08Rik     | 73979  | 11   | 20636557  | 20638179  | +    |
| 7579 | 1422701_at   | Region | Zap70             | 22637  | 1    | 37056452  | 37077407  | +    |
| 7580 | 1426764_at   | Region | Oaz2              | 18247  | 9    | 65798855  | 65812562  | +    |
| 7581 | 1425439_a_at | Region | Slc41a3           | 71699  | 6    | 91044196  | 91085644  | +    |
| 7582 | 1434561_at   | Region | Asxl1             | 228790 | 2    | 152803270 | 152859009 | +    |
| 7583 | 1446141_at   | Region | Tgfb2             | 21808  | 1    | 186121756 | 186210661 | -    |
| 7584 | 1424663_at   | Region | BC017647          | 216971 | 11   | 77841285  | 77881745  | +    |
| 7585 | 1424661_at   | Region | Pmpca             | 66865  | 2    | 26321510  | 26329283  | +    |
| 7586 | 1425304_s_at | Region | Prima1            | 170952 | 12   | 98643479  | 98689656  | -    |
| 7587 | 1441724_at   | Region | None              | None   | 9    | 100833426 | 100833940 | +    |
| 7588 | 1419710_at   | Region | Nxph3             | 104079 | 11   | 95330939  | 95335358  | -    |
| 7589 | 1460660_x_at | Region | Rer1              | 67830  | 4    | 153566474 | 153578659 | -    |
| 7590 | 1456599_at   | Region | Nxt2              | 237082 | X    | 135668250 | 135679730 | +    |
| 7591 | 1429411_a_at | Region | Eny2              | 223527 | 15   | 44373735  | 44383309  | +    |
| 7592 | 1457930_at   | Region | Jarid1c           | 20591  | X    | 145767667 | 145808191 | +    |
| 7593 | 1422865_at   | Region | Runx1             | 12394  | 16   | 91765168  | 91858413  | -    |
| 7594 | 1450090_at   | Region | Zfp101            | 22643  | 17   | 31079009  | 31092917  | -    |
| 7595 | 1458308_at   | Region | Stno              | 216161 | 10   | 80180244  | 80225913  | -    |
| 7596 | 1432217_a_at | Region | 1700019F09Rik     | 71860  | 11   | 67650462  | 67691292  | -    |
| 7597 | 1441938_x_at | Region | Cables1           | 63955  | 18   | 12026875  | 12133165  | +    |
| 7598 | 1423209_at   | Region | 0610041E09Rik     | 66074  | 13   | 86207541  | 86225129  | +    |
| 7599 | 1424638_at   | Region | Cdkn1a            | 12575  | 17   | 26902192  | 26909139  | +    |
| 7600 | 1429612_at   | Region | Eml4              | 78798  | 17   | 81184646  | 81313423  | +    |
| 7601 | 1432644_at   | Region | 6430711C07Rik     | 76225  | 6    | 27952566  | 27954091  | +    |
| 7602 | 1419486_at   | Region | Foxc1             | 17300  | 13   | 31286268  | 31290257  | +    |
| 7603 | 1427417_at   | Region | Scml4             | 268297 | 10   | 42967077  | 43067140  | +    |
| 7604 | 1434262_at   | Region | None              | None   | 11   | 113482450 | 113484044 | +    |
| 7605 | 1447945_at   | Region | None              | None   | 8    | 115019852 | 115020530 | -    |
| 7606 | 1460474_at   | Region | 2610028L16Rik     | 76368  | 12   | 17816096  | 17818049  | +    |
| 7607 | 1427550_at   | Region | Peg10             | 170676 | 6    | 4700265   | 4713361   | +    |
| 7608 | 1431436_a_at | Region | 3110023G01Rik     | 71206  | 18   | 77114915  | 77169011  | -    |
| 7609 | 1438581_at   | Region | 4932439K10Rik     | 74392  | 10   | 75332436  | 75414133  | +    |
| 7610 | 1436310_at   | Region | Gemin5            | 216766 | 11   | 57846919  | 57894102  | -    |
| 7611 | 1436976_a_at | Region | 9930028C20Rik     | 226418 | 1    | 130566762 | 130571455 | +    |

|      |              |        |               |        |      |           |           |      |
|------|--------------|--------|---------------|--------|------|-----------|-----------|------|
| 7612 | 1436625_at   | Region | Fcgr1         | 14129  | 3    | 95770745  | 95781805  | -    |
| 7613 | 1416346_at   | Region | Timm8a        | 30058  | X    | 128082197 | 128086568 | -    |
| 7614 | 1432000_a_at | Region | Dedd          | 21945  | 1    | 171267091 | 171270454 | +    |
| 7615 | 1425550_a_at | Region | Prkar1a       | 19084  | 11   | 109472038 | 109490737 | +    |
| 7616 | 1428832_at   | Region | 1600002H07Rik | 72016  | 17   | 22018639  | 22024354  | -    |
| 7617 | 1433679_at   | Region | Fubp3         | 320267 | 2    | 31527019  | 31549061  | +    |
| 7618 | 1427168_a_at | Region | Col14a1       | 12818  | 15   | 55311277  | 55525876  | +    |
| 7619 | 1418543_s_at | Region | D11ErtD707e   | 52715  | 11   | 102505777 | 102518814 | -    |
| 7620 | 1423555_a_at | Region | lfi44         | 99899  | 3    | 150711335 | 150730313 | -    |
| 7621 | 1449750_at   | Region | AA407331      | 106839 | NONE | NONE      | NONE      | NONE |
| 7622 | 1455834_x_at | Region | Tacc3         | 21335  | 5    | 32147518  | 32160849  | +    |
| 7623 | 1439871_at   | Region | Lmtk2         | 231876 | 5    | 143211341 | 143229817 | +    |
| 7624 | 1438664_at   | Region | Prkar2b       | 19088  | 12   | 28534800  | 28637055  | -    |
| 7625 | 1424591_at   | Region | 5830433M19Rik | 67770  | 4    | 93475153  | 93531856  | -    |
| 7626 | 1418592_at   | Region | Dnaja4        | 58233  | 9    | 54817109  | 54833863  | +    |
| 7627 | 1457303_at   | Region | 2700067D09Rik | 72615  | 16   | 4611327   | 4634162   | -    |
| 7628 | 1446036_at   | Region | AU018728      | 106981 | 18   | 42978398  | 42979134  | -    |
| 7629 | 1433941_at   | Region | Pib5pa        | 170835 | 11   | 3389170   | 3399608   | -    |
| 7630 | 1453237_at   | Region | Qars          | 97541  | 9    | 108556974 | 108564815 | +    |
| 7631 | 1451005_at   | Region | Sumo1         | 22218  | 1    | 59942975  | 59974347  | +    |
| 7632 | 1426375_s_at | Region | BC019806      | 218885 | 14   | 30218148  | 30235400  | +    |
| 7633 | 1424487_x_at | Region | Txnrd1        | 50493  | 10   | 82746224  | 82784757  | +    |
| 7634 | 1455638_at   | Region | None          | None   | 8    | 94607184  | 94607824  | -    |
| 7635 | 1446626_at   | Region | D16H22S680E   | 27883  | 16   | 17071867  | 17095487  | -    |
| 7636 | 1453746_at   | Region | Fnbp1         | 14269  | 2    | 30985397  | 31074101  | -    |
| 7637 | 1457751_at   | Region | 4832420A03Rik | 320612 | 7    | 91735524  | 91736416  | +    |
| 7638 | 1420368_at   | Region | Denr          | 68184  | 5    | 123078362 | 123100021 | +    |
| 7639 | 1429806_at   | Region | Eral1         | 57837  | 11   | 77799035  | 77806004  | -    |
| 7640 | 1435098_at   | Region | None          | None   | 10   | 39959929  | 39960674  | -    |
| 7641 | 1436608_at   | Region | MGC47262      | 239647 | 15   | 97323750  | 97462319  | +    |
| 7642 | 1449092_at   | Region | Ppm1d         | 53892  | 11   | 85039246  | 85075058  | +    |
| 7643 | 1423929_at   | Region | Phgdhl1       | 68889  | 14   | 116446863 | 116589587 | +    |
| 7644 | 1436793_at   | Region | St18          | 240690 | 1    | 6695648   | 6826537   | +    |
| 7645 | 1423218_a_at | Region | Mrpl49        | 18120  | 19   | 5842420   | 5846541   | -    |
| 7646 | 1448962_at   | Region | Myh11         | 17880  | 16   | 12930823  | 13027159  | -    |
| 7647 | 1455700_at   | Region | Mterfd3       | 74238  | 10   | 85014096  | 85022661  | -    |
| 7648 | 1459869_x_at | Region | 4930402E16Rik | 319518 | 8    | 110392463 | 110432862 | +    |
| 7649 | 1439656_at   | Region | Pafah1b1      | 18472  | 11   | 74399613  | 74450328  | -    |
| 7650 | 1437583_x_at | Region | Acas2l        | 68738  | 2    | 150075047 | 150125165 | -    |
| 7651 | 1434182_at   | Region | Ddx31         | 227674 | 2    | 28819047  | 28837734  | +    |
| 7652 | 1431253_s_at | Region | 4933431N12Rik | 71310  | 8    | 82412909  | 82519979  | +    |
| 7653 | 1430955_at   | Region | 2810403A07Rik | 74200  | 3    | 88429682  | 88456786  | +    |
| 7654 | 1460317_s_at | Region | Gna13         | 14674  | 11   | 109184029 | 109219306 | +    |
| 7655 | 1436972_at   | Region | Gpr61         | 229714 | 3    | 107944063 | 107950624 | -    |
| 7656 | 1430952_at   | Region | 3110039C02Rik | 73127  | 3    | 25065670  | 25066876  | -    |
| 7657 | 1440548_at   | Region | Btdb9         | 224671 | 17   | 28030141  | 28340405  | -    |
| 7658 | 1441554_at   | Region | 4833446K15Rik | 78923  | 18   | 59406652  | 59407180  | +    |
| 7659 | 1460345_at   | Region | 2610208M17Rik | 108909 | 8    | 3442132   | 3444816   | +    |
| 7660 | 1423957_at   | Region | Isg2011       | 68048  | 7    | 72688034  | 72700940  | +    |
| 7661 | 1434647_at   | Region | AU040377      | 268780 | 15   | 6993687   | 7185872   | -    |
| 7662 | 1435076_at   | Region | 2310047D13Rik | 116972 | 11   | 75927673  | 75935074  | +    |
| 7663 | 1434274_at   | Region | Phr1          | 105689 | 14   | 97658865  | 97891435  | -    |
| 7664 | 1433673_at   | Region | LOC432582     | 432582 | 11   | 74366252  | 74367175  | +    |
| 7665 | 1440223_at   | Region | Rbm6          | 19654  | 9    | 107841550 | 107940685 | -    |
| 7666 | 1452929_at   | Region | Rsn           | 56430  | 5    | 122749321 | 122826732 | -    |
| 7667 | 1447643_x_at | Region | Snai2         | 20583  | 16   | 13416441  | 13419967  | +    |
| 7668 | 1446230_at   | Region | Gm944         | 381126 | 18   | 21343840  | 21521608  | -    |
| 7669 | 1421901_at   | Region | Eif2ak1       | 15467  | 5    | 142939806 | 142944198 | +    |
| 7670 | 1450670_at   | Region | Dbh           | 13166  | 2    | 27097395  | 27115081  | +    |
| 7671 | 1421692_at   | Region | Cacna1e       | 12290  | 1    | 154285134 | 154615539 | -    |
| 7672 | 1457140_s_at | Region | 4632411J06Rik | 78748  | 7    | 106807656 | 106811140 | +    |
| 7673 | 1424104_at   | Region | Cbpin         | 68592  | 4    | 133891883 | 133898440 | +    |
| 7674 | 1450480_a_at | Region | Gprk6         | 26385  | 13   | 54054856  | 54068930  | +    |
| 7675 | 1418073_at   | Region | MGI:1928939   | 56360  | X    | 148888659 | 148923797 | +    |
| 7676 | 1450818_a_at | Region | Ndufa7        | 66416  | 17   | 31523009  | 31536811  | +    |

|      |              |        |               |        |      |           |           |      |
|------|--------------|--------|---------------|--------|------|-----------|-----------|------|
| 7677 | 1439263_at   | Region | Fin15         | 14210  | 6    | 50344694  | 50347651  | +    |
| 7678 | 1441140_at   | Region | Rere          | 68703  | 4    | 148898702 | 149114159 | +    |
| 7679 | 1455895_x_at | Region | 1110012M11Rik | 73711  | 8    | 70692174  | 70697270  | +    |
| 7680 | 1430352_at   | Region | 8430417A20Rik | 74516  | 6    | 93270147  | 93297136  | +    |
| 7681 | 1442040_at   | Region | None          | None   | 4    | 117499012 | 117499705 | -    |
| 7682 | 1445480_at   | Region | Gpr19         | 14760  | 6    | 135626628 | 135645189 | -    |
| 7683 | 1443242_at   | Region | D5Erttd121e   | 52230  | 5    | 23871885  | 23872226  | -    |
| 7684 | 1458446_at   | Region | 3222401L13Rik | 320513 | 18   | 37881705  | 37882651  | +    |
| 7685 | 1450278_at   | Region | Tacr3         | 21338  | 3    | 133712014 | 133817494 | +    |
| 7686 | 1442342_at   | Region | Sp6           | 83395  | 11   | 96834656  | 96845821  | +    |
| 7687 | 1446627_at   | Region | Stk3          | 56274  | 15   | 34876656  | 35155734  | -    |
| 7688 | 1453851_a_at | Region | Gadd45g       | 23882  | 13   | 50400377  | 50402159  | +    |
| 7689 | 1448708_at   | Region | Pparbp        | 19014  | 11   | 97973241  | 98014347  | -    |
| 7690 | 1449342_at   | Region | Ptplb         | 70757  | 16   | 33805502  | 33889652  | +    |
| 7691 | 1458849_at   | Region | Asah2         | 54447  | 19   | 31310118  | 31428612  | -    |
| 7692 | 1441405_at   | Region | None          | None   | 18   | 38946621  | 38947439  | +    |
| 7693 | 1439580_at   | Region | B930053N05Rik | 105425 | 14   | 69131879  | 69132728  | -    |
| 7694 | 1425135_a_at | Region | Dnm2          | 13430  | 9    | 21313566  | 21396180  | +    |
| 7695 | 1435372_a_at | Region | Pa2g4         | 18813  | 10   | 128295733 | 128303038 | -    |
| 7696 | 1434465_x_at | Region | Vldlr         | 22359  | 19   | 26457498  | 26489686  | +    |
| 7697 | 1438226_at   | Region | AU022252      | 230696 | 4    | 118185114 | 118191611 | -    |
| 7698 | 1435160_at   | Region | 1110064P04Rik | 268390 | 11   | 23383337  | 23392736  | -    |
| 7699 | 1457869_at   | Region | None          | None   | 12   | 73305786  | 73306333  | +    |
| 7700 | 1444466_at   | Region | Ncald         | 52589  | 15   | 37371112  | 37797344  | -    |
| 7701 | 1425699_a_at | Region | Abhd14a       | 68644  | 9    | 106433630 | 106441207 | -    |
| 7702 | 1440079_at   | Region | 3632454L22Rik | 320606 | X    | 128567667 | 128568316 | -    |
| 7703 | 1457145_at   | Region | Plekhg4       | 102075 | 8    | 104670532 | 104678487 | +    |
| 7704 | 1428119_a_at | Region | Rap2c         | 72065  | X    | 45525090  | 45538760  | -    |
| 7705 | 1427908_at   | Region | Bnip1         | 224630 | 17   | 24576290  | 24587338  | +    |
| 7706 | 1420822_s_at | Region | Sgpp1         | 81535  | 12   | 72570627  | 72592022  | -    |
| 7707 | 1445456_at   | Region | Kcmf1         | 74287  | 6    | 73177405  | 73198187  | -    |
| 7708 | 1424788_at   | Region | BC021438      | 215194 | 9    | 21159727  | 21174226  | -    |
| 7709 | 1433598_at   | Region | 9430010O03Rik | 234023 | 8    | 8032433   | 8056378   | -    |
| 7710 | 1427683_at   | Region | Egr2          | 13654  | 10   | 67591672  | 67595982  | +    |
| 7711 | 1426060_at   | Region | Cul4a         | 99375  | 8    | 12484378  | 12526411  | +    |
| 7712 | 1415723_at   | Region | Eif5          | 217869 | 12   | 107012763 | 107017765 | +    |
| 7713 | 1459222_x_at | Region | None          | None   | NONE | NONE      | NONE      | NONE |
| 7714 | 1455868_a_at | Region | Tubgcp2       | 74237  | 7    | 134394993 | 134435263 | -    |
| 7715 | 1441667_s_at | Region | Smyd1         | 12180  | 6    | 71547104  | 71594179  | -    |
| 7716 | 1438967_x_at | Region | Amhr2         | 110542 | 15   | 102505839 | 102515049 | +    |
| 7717 | 1420387_at   | Region | Mpv17         | 17527  | 5    | 29599886  | 29613169  | -    |
| 7718 | 1457203_at   | Region | None          | None   | 3    | 55462048  | 55462695  | -    |
| 7719 | 1424118_a_at | Region | Spbc25        | 66442  | 2    | 69049296  | 69061557  | -    |
| 7720 | 1453799_at   | Region | 9430038I01Rik | 77252  | 7    | 131739470 | 131779393 | -    |
| 7721 | 1434195_at   | Region | Prss35        | 244954 | 9    | 87085453  | 87100637  | +    |
| 7722 | 1447091_at   | Region | Jmjd2c        | 76804  | 4    | 73313167  | 73467080  | +    |
| 7723 | 1457676_at   | Region | Tirap         | 117149 | 9    | 35100808  | 35113918  | -    |
| 7724 | 1456961_at   | Region | Eny2          | 223527 | 15   | 44373735  | 44383309  | +    |
| 7725 | 1415952_at   | Region | Mark2         | 13728  | 19   | 6990598   | 7055161   | -    |
| 7726 | 1451531_at   | Region | Cbwd1         | 226043 | 19   | 24160457  | 24201588  | -    |
| 7727 | 1456356_at   | Region | B230217O12Rik | 320879 | 19   | 56908922  | 56909654  | -    |
| 7728 | 1435438_at   | Region | Sox8          | 20681  | 17   | 23371562  | 23376362  | -    |
| 7729 | 1460018_at   | Region | D11Erttd759e  | 268513 | 11   | 119297145 | 119297814 | -    |
| 7730 | 1433398_at   | Region | 5830461L01Rik | 76091  | 13   | 48876129  | 48877130  | -    |
| 7731 | 1434521_at   | Region | 9930116O05Rik | 319758 | 9    | 72752141  | 72755606  | +    |
| 7732 | 1443566_at   | Region | A330103N21Rik | 77773  | 7    | 61958738  | 61959255  | +    |
| 7733 | 1460122_at   | Region | Tmem41b       | 233724 | 7    | 103825350 | 103839101 | -    |
| 7734 | 1455832_a_at | Region | Umps          | 22247  | 16   | 32763201  | 32775192  | -    |
| 7735 | 1458630_at   | Region | Vav3          | 57257  | 3    | 109150078 | 109494759 | +    |
| 7736 | 1429419_at   | Region | 2310007A19Rik | 66353  | 3    | 93952806  | 93961414  | -    |
| 7737 | 1438469_at   | Region | Bcor1l        | 320376 | X    | 42889570  | 42927501  | +    |
| 7738 | 1451909_a_at | Region | Prpf4b        | 19134  | 13   | 34407672  | 34435208  | +    |
| 7739 | 1445550_at   | Region | None          | None   | 4    | 24748076  | 24748629  | -    |
| 7740 | 1455461_at   | Region | A530017D24Rik | 103880 | 11   | 61591297  | 61594459  | -    |
| 7741 | 1426090_a_at | Region | Fert2         | 14158  | 17   | 61637960  | 61842673  | +    |

|      |              |        |               |        |      |           |           |      |
|------|--------------|--------|---------------|--------|------|-----------|-----------|------|
| 7742 | 1444231_at   | Region | Zdhhc6        | 66980  | 19   | 54859814  | 54896233  | -    |
| 7743 | 1424846_at   | Region | BC027174      | 216543 | 11   | 20123299  | 20144210  | -    |
| 7744 | 1439071_at   | Region | 5430416N02Rik | 71426  | 5    | 99439474  | 99448174  | -    |
| 7745 | 1420363_at   | Region | Biklk         | 12124  | 15   | 83575461  | 83593234  | +    |
| 7746 | 1448264_a_at | Region | Eif3s2        | 54709  | 4    | 128619087 | 128627726 | -    |
| 7747 | 1453833_a_at | Region | Rnaseh1       | 19819  | 12   | 25214880  | 25224831  | +    |
| 7748 | 1452471_at   | Region | Il17rd        | 171463 | 14   | 25177287  | 25240714  | +    |
| 7749 | 1452698_at   | Region | Tsfm          | 66399  | 10   | 126755051 | 126763533 | -    |
| 7750 | 1424424_at   | Region | Slc39a1       | 30791  | 3    | 90058648  | 90064030  | +    |
| 7751 | 1456587_x_at | Region | 2010005J08Rik | 72046  | 11   | 5608972   | 5635937   | -    |
| 7752 | 1426147_s_at | Region | Cldn10        | 58187  | 14   | 113343391 | 113430546 | +    |
| 7753 | 1453200_at   | Region | Rai1          | 19377  | 11   | 59865724  | 59917667  | +    |
| 7754 | 1419245_at   | Region | Rab14         | 68365  | 2    | 35113675  | 35132954  | -    |
| 7755 | 1419354_at   | Region | Klf7          | 93691  | 1    | 64328681  | 64414407  | -    |
| 7756 | 1415703_at   | Region | Huwe1         | 59026  | X    | 145451533 | 145469813 | +    |
| 7757 | 1451464_at   | Region | Mfap3         | 216760 | 11   | 57244336  | 57256528  | +    |
| 7758 | 1437227_at   | Region | 2900073H19Rik | 68205  | 2    | 29759551  | 29777158  | +    |
| 7759 | 1430428_at   | Region | 2310066F23Rik | 70409  | 19   | 55135717  | 55137191  | +    |
| 7760 | 1426018_a_at | Region | Sox6          | 20679  | 7    | 109336962 | 109662307 | -    |
| 7761 | 1429508_at   | Region | 2310057M21Rik | 68277  | 7    | 125654758 | 125677792 | -    |
| 7762 | 1459041_at   | Region | None          | None   | X    | 95764991  | 95765448  | -    |
| 7763 | 1455250_at   | Region | Sh3bp4        | 98402  | 1    | 88890095  | 88973785  | +    |
| 7764 | 1432452_at   | Region | 1700054O19Rik | 74272  | 14   | 24081604  | 24082471  | -    |
| 7765 | 1430778_a_at | Region | Nubp1         | 26425  | 16   | 10086475  | 10098031  | +    |
| 7766 | 1429352_at   | Region | Mocos         | 68591  | 18   | 24881983  | 24930071  | +    |
| 7767 | 1449572_at   | Region | Trhr          | 22045  | 15   | 44141857  | 44181536  | +    |
| 7768 | 1443916_at   | Region | 2900026A02Rik | 243219 | 5    | 112159902 | 112240390 | -    |
| 7769 | 1451370_at   | Region | None          | None   | 4    | 43409286  | 43411844  | +    |
| 7770 | 1458128_at   | Region | C430010P07Rik | 227227 | 1    | 67011628  | 67093590  | -    |
| 7771 | 1418737_at   | Region | Nudt2         | 66401  | 4    | 41616365  | 41619763  | +    |
| 7772 | 1439963_x_at | Region | 1700129I04Rik | 330577 | 7    | 76489483  | 76505046  | -    |
| 7773 | 1448195_at   | Region | Taf5l         | 102162 | 8    | 123283382 | 123308381 | -    |
| 7774 | 1457791_at   | Region | B830008H07Rik | 101646 | 7    | 39551853  | 39552521  | -    |
| 7775 | 1417134_at   | Region | Srpk2         | 20817  | 5    | 21967253  | 22080468  | -    |
| 7776 | 1448957_at   | Region | Rbpsuh        | 19664  | 5    | 52400484  | 52466172  | +    |
| 7777 | 1454475_at   | Region | 4921524M04Rik | 70890  | 7    | 119541286 | 119542790 | +    |
| 7778 | 1442326_at   | Region | Pcdh15        | 11994  | 10   | 74319368  | 74727834  | +    |
| 7779 | 1447415_at   | Region | G630013P12Rik | 218513 | 13   | 96291899  | 96292159  | -    |
| 7780 | 1416596_at   | Region | 2210409B01Rik | 70129  | 17   | 32618260  | 32634136  | +    |
| 7781 | 1427030_at   | Region | D16Ert480e    | 212514 | 16   | 43230787  | 43271716  | +    |
| 7782 | 1424452_at   | Region | 5730555F13Rik | 66660  | 9    | 70720790  | 70732757  | +    |
| 7783 | 1449933_a_at | Region | 5730449L18Rik | 66637  | 1    | 152255223 | 152271166 | -    |
| 7784 | 1456335_at   | Region | Gm106         | 226866 | 1    | 16033017  | 16070386  | -    |
| 7785 | 1458637_x_at | Region | Ube3c         | 100763 | 5    | 28019724  | 28126560  | +    |
| 7786 | 1448332_at   | Region | Pex19         | 19298  | 1    | 172055691 | 172064699 | +    |
| 7787 | 1422839_at   | Region | Neurog2       | 11924  | 3    | 126516140 | 126518626 | +    |
| 7788 | 1416831_at   | Region | Neu1          | 18010  | 17   | 32635159  | 32639101  | +    |
| 7789 | 1444359_at   | Region | 2810407L07Rik | 69228  | 6    | 48173858  | 48174736  | +    |
| 7790 | 1415870_at   | Region | Calu          | 12321  | 6    | 29395242  | 29423765  | +    |
| 7791 | 1429694_at   | Region | 4930402H24Rik | 228602 | 2    | 130221684 | 130353963 | -    |
| 7792 | 1415864_at   | Region | Bpgm          | 12183  | 6    | 34570624  | 34599878  | +    |
| 7793 | 1441702_at   | Region | Rfx3          | 19726  | 19   | 27008207  | 27251206  | -    |
| 7794 | 1457216_at   | Region | N28103        | 96936  | 1    | 160834701 | 160835015 | +    |
| 7795 | 1426044_a_at | Region | Prkcq         | 18761  | 2    | 11088122  | 11217235  | +    |
| 7796 | 1432591_at   | Region | Pappa         | 18491  | 4    | 64215365  | 64448700  | +    |
| 7797 | 1456674_at   | Region | E130016E03Rik | 320890 | 4    | 11485906  | 11542772  | +    |
| 7798 | 1433422_at   | Region | 2210008N01Rik | 76579  | 2    | 57048875  | 57049460  | +    |
| 7799 | 1435107_at   | Region | AW456874      | 218232 | 13   | 48175930  | 48223631  | -    |
| 7800 | 1448710_at   | Region | Cxcr4         | 12767  | 1    | 128431063 | 128435143 | -    |
| 7801 | 1433032_at   | Region | 2900064K03Rik | 72976  | 5    | 48281355  | 48282908  | -    |
| 7802 | 1427373_at   | Region | Amigo1        | 229715 | 3    | 107982077 | 107987519 | +    |
| 7803 | 1418081_at   | Region | Wbscr18       | 66114  | 5    | 134077698 | 134078857 | +    |
| 7804 | 1423615_at   | Region | Zfp364        | 67845  | 3    | 96215500  | 96278811  | +    |
| 7805 | 1440985_at   | Region | D130023J23Rik | 319769 | NONE | NONE      | NONE      | NONE |
| 7806 | 1421487_a_at | Region | Nck1          | 17973  | 9    | 100396550 | 100447600 | -    |

|      |              |        |               |        |      |           |           |      |
|------|--------------|--------|---------------|--------|------|-----------|-----------|------|
| 7807 | 1417721_s_at | Region | Laptm5        | 16792  | 4    | 129708150 | 129733024 | +    |
| 7808 | 1439122_at   | Region | None          | None   | 9    | 44626449  | 44627219  | +    |
| 7809 | 1449483_at   | Region | Polk          | 27015  | 13   | 92672015  | 92733811  | -    |
| 7810 | 1425900_at   | Region | Hkdc1         | 216019 | 10   | 62349472  | 62388792  | -    |
| 7811 | 1438498_at   | Region | LOC574428     | 574428 | 11   | 70190479  | 70191873  | +    |
| 7812 | 1434627_at   | Region | None          | None   | 6    | 30163315  | 30187986  | +    |
| 7813 | 1421034_a_at | Region | Il4ra         | 16190  | 7    | 119602018 | 119627698 | +    |
| 7814 | 1460098_at   | Region | None          | None   | 12   | 104260749 | 104261840 | -    |
| 7815 | 1439820_at   | Region | Ebf1          | 13591  | 11   | 44370971  | 44758012  | +    |
| 7816 | 1430268_at   | Region | 9630005C17Rik | 78743  | 19   | 21791848  | 21793126  | +    |
| 7817 | 1444459_at   | Region | Lmnb1         | 16906  | 18   | 56949007  | 56973792  | +    |
| 7818 | 1428341_at   | Region | Zfp655        | 72611  | 5    | 144270195 | 144285742 | +    |
| 7819 | 1423989_at   | Region | 2210010N04Rik | 70381  | 5    | 143236935 | 143265219 | -    |
| 7820 | 1449623_at   | Region | Txnrd3        | 232223 | 6    | 90079638  | 90111154  | +    |
| 7821 | 1416870_at   | Region | Dnalc4        | 54152  | 15   | 79813776  | 79826755  | -    |
| 7822 | 1427654_a_at | Region | Htrf4         | 15562  | 18   | 62640984  | 62693462  | +    |
| 7823 | 1457696_at   | Region | Rilp          | 280408 | 11   | 75236579  | 75238823  | +    |
| 7824 | 1417234_at   | Region | Mmp11         | 17385  | 10   | 76024964  | 76034203  | -    |
| 7825 | 1427564_at   | Region | Diap2         | 54004  | X    | 123208926 | 123787987 | +    |
| 7826 | 1451029_at   | Region | Bcl2l2        | 12050  | 14   | 49400262  | 49405071  | +    |
| 7827 | 1442358_at   | Region | AA409587      | 101447 | 7    | 94053651  | 94054550  | -    |
| 7828 | 1430969_at   | Region | Mtch2         | 56428  | 2    | 90551904  | 90571383  | +    |
| 7829 | 1416073_a_at | Region | Pcnt1         | 445007 | 11   | 115385575 | 115405078 | +    |
| 7830 | 1442003_at   | Region | None          | None   | X    | 123923942 | 123924962 | +    |
| 7831 | 1459020_at   | Region | Amigo1        | 229715 | 3    | 107982077 | 107987519 | +    |
| 7832 | 1451337_at   | Region | Psmf1         | 228769 | 2    | 151172998 | 151198229 | -    |
| 7833 | 1422973_a_at | Region | Thrsp         | 21835  | 7    | 91459228  | 91463781  | -    |
| 7834 | 1439034_at   | Region | Spn           | 20737  | 7    | 121184353 | 121187067 | -    |
| 7835 | 1457712_at   | Region | Chd8          | 67772  | 14   | 47298256  | 47322726  | -    |
| 7836 | 1444895_at   | Region | Jam3          | 83964  | 9    | 26991141  | 27048370  | -    |
| 7837 | 1429882_at   | Region | 2610005L07Rik | 381598 | 15   | 1398      | 8167      | +    |
| 7838 | 1442678_at   | Region | 1810010N17Rik | 66264  | 4    | 128646387 | 128651013 | -    |
| 7839 | 1429407_at   | Region | Pex11c        | 69129  | 8    | 4142      | 7868      | +    |
| 7840 | 1457467_at   | Region | None          | None   | NONE | NONE      | NONE      | NONE |
| 7841 | 1444716_at   | Region | Mettl2        | 52686  | 11   | 104947576 | 104961490 | +    |
| 7842 | 1447007_at   | Region | 1700008I05Rik | 71841  | X    | 129214254 | 129214725 | +    |
| 7843 | 1436914_at   | Region | None          | None   | 2    | 121528276 | 121529176 | +    |
| 7844 | 1450855_at   | Region | Arvcf         | 11877  | 16   | 17119316  | 17178126  | +    |
| 7845 | 1455009_at   | Region | Cpd           | 12874  | 11   | 76507648  | 76572655  | -    |
| 7846 | 1439972_at   | Region | Etnk1         | 75320  | 6    | 144013618 | 144053017 | +    |
| 7847 | 1443930_at   | Region | BC052046      | 240063 | 17   | 30574901  | 30633632  | -    |
| 7848 | 1418944_at   | Region | Cysltr1       | 58861  | X    | 101177882 | 101204827 | -    |
| 7849 | 1416018_at   | Region | Dr1           | 13486  | 5    | 107345107 | 107356731 | +    |
| 7850 | 1459565_at   | Region | Uty           | 22290  | Y    | 41346     | 184254    | +    |
| 7851 | 1437449_at   | Region | BC056485      | 237926 | 11   | 94360886  | 94361344  | -    |
| 7852 | 1439484_at   | Region | 4930431H11Rik | 73785  | 3    | 18560494  | 18561480  | -    |
| 7853 | 1445684_s_at | Region | Hdac2         | 15182  | 10   | 37046787  | 37075975  | +    |
| 7854 | 1436844_at   | Region | 6330403M23Rik | 109169 | 18   | 36517844  | 36520598  | +    |
| 7855 | 1449718_s_at | Region | 4930453N24Rik | 67609  | 16   | 63789732  | 63795010  | -    |
| 7856 | 1439062_at   | Region | Kbtbd3        | 69149  | 9    | 4217421   | 4239297   | +    |
| 7857 | 1452506_a_at | Region | Ilkap         | 67444  | 1    | 91198873  | 91221825  | -    |
| 7858 | 1438701_at   | Region | Bicd1         | 12121  | 6    | 4102      | 11525     | +    |
| 7859 | 1453231_at   | Region | Cdkl1         | 71091  | 12   | 66578318  | 66622177  | -    |
| 7860 | 1421035_a_at | Region | Magi3         | 99470  | 3    | 103442526 | 103647825 | -    |
| 7861 | 1447357_at   | Region | None          | None   | 11   | 87739983  | 87775999  | -    |
| 7862 | 1440354_at   | Region | Elov17        | 74559  | 13   | 104441513 | 104512532 | +    |
| 7863 | 1425739_at   | Region | Pld1          | 18805  | 3    | 27441540  | 27550616  | +    |
| 7864 | 1456089_at   | Region | Trim23        | 81003  | 13   | 100397284 | 100420234 | +    |
| 7865 | 1427135_at   | Region | Sfrs12        | 218543 | 13   | 99959715  | 99982622  | -    |
| 7866 | 1438661_a_at | Region | Arf2          | 11841  | 11   | 103787960 | 103806425 | +    |
| 7867 | 1446833_at   | Region | Dock9         | 105445 | 14   | 116113166 | 116206323 | -    |
| 7868 | 1445870_at   | Region | Cdc42ep2      | 104252 | 19   | 5706351   | 5707785   | -    |
| 7869 | 1431832_x_at | Region | Exosc10       | 50912  | 4    | 147050820 | 147074759 | +    |
| 7870 | 1432272_a_at | Region | Erccl4        | 50505  | 16   | 11850826  | 11883488  | +    |
| 7871 | 1424728_at   | Region | BC011248      | 224823 | 17   | 44178175  | 44184988  | -    |

|      |              |        |               |        |      |           |           |      |
|------|--------------|--------|---------------|--------|------|-----------|-----------|------|
| 7872 | 1455306_at   | Region | BC037112      | 231128 | 5    | 32898910  | 32974787  | +    |
| 7873 | 1420968_at   | Region | Btbd14b       | 66830  | 8    | 83935746  | 83953228  | -    |
| 7874 | 1416291_at   | Region | Psmc4         | 23996  | 7    | 23437587  | 23445795  | -    |
| 7875 | 1444703_at   | Region | 2810403D21Rik | 69964  | X    | 103435843 | 103488262 | +    |
| 7876 | 1435174_at   | Region | Rsbni         | 229675 | 3    | 103355742 | 103393938 | +    |
| 7877 | 1424585_at   | Region | Ranbp10       | 74334  | 8    | 105064168 | 105123194 | -    |
| 7878 | 1416104_at   | Region | Mpdu1         | 24070  | 11   | 69382362  | 69388300  | -    |
| 7879 | 1417097_at   | Region | Nrbf1         | 26922  | 4    | 130640356 | 130664652 | +    |
| 7880 | 1422954_at   | Region | Zfp60         | 22718  | 7    | 23111116  | 23124185  | +    |
| 7881 | 1421911_at   | Region | Stat2         | 20847  | 10   | 128007395 | 128029668 | +    |
| 7882 | 1434610_at   | Region | Plec1         | 18810  | 15   | 76219648  | 76280050  | -    |
| 7883 | 1419568_at   | Region | Mapk1         | 26413  | 16   | 15754059  | 15816626  | +    |
| 7884 | 1452796_at   | Region | Def6          | 23853  | 17   | 26003748  | 26024517  | +    |
| 7885 | 1443683_at   | Region | Ptprij        | 19271  | 2    | 90140801  | 90285334  | -    |
| 7886 | 1427879_at   | Region | 1810031K17Rik | 69171  | 1    | 75423424  | 75430579  | -    |
| 7887 | 1423106_at   | Region | Ube2b         | 22210  | 11   | 51738403  | 51753228  | -    |
| 7888 | 1443213_at   | Region | Gtdc1         | 227835 | 2    | 44496584  | 44793784  | -    |
| 7889 | 1446760_at   | Region | None          | None   | 13   | 69971333  | 69971842  | -    |
| 7890 | 1436103_at   | Region | Rab3ip        | 216363 | 10   | 116595236 | 116639832 | -    |
| 7891 | 1429743_at   | Region | 6720468P15Rik | 78073  | 19   | 57094313  | 57098510  | +    |
| 7892 | 1442154_at   | Region | U2af1-rs2     | 22184  | X    | 157534848 | 157558003 | -    |
| 7893 | 1437933_at   | Region | Hhip          | 15245  | 8    | 79185726  | 79272113  | -    |
| 7894 | 1439760_x_at | Region | Upk1b         | 22268  | 16   | 37594913  | 37621984  | -    |
| 7895 | 1437835_a_at | Region | 0610011L14Rik | 68295  | 2    | 156004536 | 156025909 | +    |
| 7896 | 1419309_at   | Region | Gp38          | 14726  | 4    | 142182695 | 142214661 | -    |
| 7897 | 1454268_a_at | Region | Cyba          | 13057  | 8    | 121806363 | 121814514 | -    |
| 7898 | 1426005_at   | Region | Dmp1          | 13406  | 5    | 103238499 | 103249944 | +    |
| 7899 | 1439180_at   | Region | A430093A21Rik | 329170 | 1    | 63346790  | 63347271  | -    |
| 7900 | 1428354_at   | Region | Foxk2         | 68837  | 11   | 121080635 | 121128991 | +    |
| 7901 | 1448984_at   | Region | Ercc4         | 50505  | 16   | 11850826  | 11883488  | +    |
| 7902 | 1426100_a_at | Region | Tk2           | 57813  | 8    | 103521036 | 103542872 | -    |
|      |              |        | Ptp4a1 ///    |        |      |           |           |      |
|      |              |        | LOC385423 /// |        |      |           |           |      |
|      |              |        | LOC433406 /// |        |      |           |           |      |
| 7903 | 1449322_at   | Region | LOC434095     | 19243  | 1    | 31213857  | 31222010  | -    |
| 7904 | 1423921_at   | Region | C77668        | 229543 | 3    | 90201806  | 90244054  | -    |
| 7905 | 1451890_at   | Region | Kif13a        | 16553  | 13   | 46347970  | 46527871  | -    |
| 7906 | 1436441_at   | Region | None          | None   | 15   | 5014873   | 5015567   | +    |
| 7907 | 1456940_at   | Region | Slc43a2       | 215113 | 11   | 75257363  | 75300699  | +    |
| 7908 | 1457062_at   | Region | 1700081L11Rik | 76719  | 11   | 104154591 | 104263380 | -    |
| 7909 | 1454538_at   | Region | D730048A03Rik | 77541  | 12   | 75465837  | 75466836  | +    |
| 7910 | 1431071_at   | Region | Mtx3          | 382793 | 13   | 89039781  | 89041514  | +    |
| 7911 | 1458230_at   | Region | Gria4         | 14802  | 9    | 4328268   | 4706535   | -    |
| 7912 | 1456813_at   | Region | None          | None   | NONE | NONE      | NONE      | NONE |
| 7913 | 1424019_at   | Region | Nol1          | 110109 | 6    | 125787913 | 125800927 | +    |
| 7914 | 1453880_s_at | Region | 1700041C02Rik | 73332  | 4    | 118281798 | 118374408 | -    |
| 7915 | 1443554_at   | Region | Ssbp3         | 72475  | 4    | 105870375 | 106008599 | +    |
| 7916 | 1459054_at   | Region | BC035954      | 194162 | 4    | 147443534 | 147445675 | +    |
| 7917 | 1435283_s_at | Region | Gm967         | 381217 | 19   | 23211527  | 23268980  | -    |
| 7918 | 1455775_at   | Region | None          | None   | NONE | NONE      | NONE      | NONE |
| 7919 | 1427305_at   | Region | Piga          | 18700  | X    | 158019221 | 158033321 | +    |
| 7920 | 1457883_at   | Region | None          | None   | 4    | 33449202  | 33449956  | -    |
| 7921 | 1434162_at   | Region | 2700078E11Rik | 78832  | 19   | 60127914  | 60181028  | -    |
| 7922 | 1449119_at   | Region | Arih2         | 23807  | 9    | 108651717 | 108698223 | -    |
| 7923 | 1446712_at   | Region | Ntrk2         | 18212  | 13   | 57448390  | 57572946  | +    |
| 7924 | 1445364_at   | Region | None          | None   | 17   | 24766842  | 24767498  | +    |
| 7925 | 1426312_at   | Region | Bre           | 107976 | 5    | 30156988  | 30543677  | +    |
| 7926 | 1458951_at   | Region | Vrk1          | 22367  | 12   | 101457929 | 101523008 | +    |
| 7927 | 1455547_at   | Region | Scrg3         | 20286  | 15   | 81795789  | 81846239  | +    |
| 7928 | 1436845_at   | Region | Axin2         | 12006  | 11   | 108741455 | 108771872 | +    |
| 7929 | 1435753_a_at | Region | Nucks1        | 98415  | 1    | 131762351 | 131784790 | +    |
| 7930 | 1441550_at   | Region | 9330184L24Rik | 402729 | X    | 114284287 | 114284952 | +    |
| 7931 | 1421145_at   | Region | Slc26a2       | 13521  | 18   | 10304     | 24932     | +    |
| 7932 | 1430694_at   | Region | None          | None   | 8    | 24537265  | 24539255  | -    |
| 7933 | 1439207_at   | Region | mKIAA1934     | 385377 | X    | 67695873  | 67697729  | -    |

|      |              |        |               |        |      |           |           |      |
|------|--------------|--------|---------------|--------|------|-----------|-----------|------|
| 7934 | 1433047_at   | Region | 5330430B06Rik | 78280  | 17   | 7249452   | 7250645   | +    |
| 7935 | 1428076_s_at | Region | Ndufb4        | 68194  | 16   | 36467069  | 36473835  | -    |
| 7936 | 1427571_at   | Region | Shh           | 20423  | 5    | 26906864  | 26917112  | -    |
| 7937 | 1443833_at   | Region | None          | None   | 6    | 127490507 | 127490708 | -    |
| 7938 | 1455666_at   | Region | A230042K10Rik | 218314 | 13   | 63913184  | 63932103  | -    |
| 7939 | 1418356_at   | Region | Mpst          | 246221 | 15   | 78461324  | 78465292  | +    |
| 7940 | 1433608_at   | Region | Scfd2         | 212986 | 5    | 73291008  | 73366380  | -    |
| 7941 | 1430827_a_at | Region | Ptk2          | 14083  | 15   | 73233486  | 73423105  | -    |
| 7942 | 1454369_a_at | Region | Nfatc4        | 73181  | 14   | 50343024  | 50351959  | +    |
| 7943 | 1434217_at   | Region | C330019G07Rik | 215476 | 5    | 31277729  | 31316129  | -    |
| 7944 | 1433617_s_at | Region | B4galt5       | 56336  | 2    | 166757794 | 166805916 | -    |
| 7945 | 1424342_at   | Region | Fytd1         | 69823  | 16   | 31685892  | 31716927  | +    |
| 7946 | 1439233_at   | Region | Tloc1         | 69276  | 3    | 30204876  | 30231459  | +    |
| 7947 | 1444700_at   | Region | E530011G23Rik | 319856 | 12   | 85108664  | 85109688  | -    |
| 7948 | 1455404_at   | Region | Jph2          | 59091  | 2    | 162794742 | 162854919 | -    |
| 7949 | 1430046_at   | Region | 3110030K17Rik | 73162  | 4    | 137776644 | 137803746 | -    |
| 7950 | 1457588_at   | Region | C76213        | 97124  | 4    | 42908649  | 42908946  | -    |
| 7951 | 1442085_at   | Region | Whsc1l1       | 234135 | 8    | 24322608  | 24439465  | +    |
| 7952 | 1429080_at   | Region | Mphosph10     | 67973  | 7    | 58155241  | 58166183  | -    |
| 7953 | 1437198_at   | Region | None          | None   | 11   | 82542022  | 82543999  | +    |
| 7954 | 1433029_at   | Region | Kcnj9         | 16524  | 1    | 172251006 | 172258201 | -    |
| 7955 | 1450913_at   | Region | B4galt6       | 56386  | 18   | 20900931  | 20961332  | -    |
| 7956 | 1455414_at   | Region | Ttc16         | 338348 | 2    | 32694340  | 32707501  | -    |
| 7957 | 1428220_at   | Region | 5730419I09Rik | 74741  | 6    | 143857967 | 143947128 | -    |
| 7958 | 1444744_at   | Region | None          | None   | 2    | 180382893 | 180383696 | -    |
| 7959 | 1454683_at   | Region | Sfrs8         | 231769 | 5    | 128676882 | 128691989 | +    |
| 7960 | 1423752_at   | Region | Ddx47         | 67755  | 6    | 135769073 | 135781224 | +    |
| 7961 | 1430370_at   | Region | Eprs          | 107508 | 1    | 184906893 | 184908652 | +    |
| 7962 | 1450643_s_at | Region | Acsi1         | 14081  | 8    | 45417959  | 45481923  | +    |
| 7963 | 1435037_at   | Region | Perld1        | 320655 | 11   | 98209764  | 98224134  | -    |
| 7964 | 1423779_at   | Region | Chchd6        | 66098  | 6    | 89818799  | 90031255  | -    |
| 7965 | 1424398_at   | Region | Dhx36         | 72162  | 3    | 62137118  | 62174023  | -    |
| 7966 | 1426869_at   | Region | Boc           | 117606 | 16   | 43368375  | 43441912  | -    |
| 7967 | 1421082_s_at | Region | Banf1         | 23825  | 19   | 5153430   | 5155435   | -    |
| 7968 | 1450810_at   | Region | Fshr          | 14309  | 17   | 86847074  | 87063567  | -    |
| 7969 | 1416878_at   | Region | Mrpl51        | 66493  | 6    | 125848878 | 125851070 | +    |
| 7970 | 1424576_s_at | Region | Cyp2c44       | 226143 | 19   | 43549428  | 43573605  | -    |
| 7971 | 1439563_at   | Region | Al854635      | 193043 | 11   | 70490105  | 70498572  | +    |
| 7972 | 1422054_a_at | Region | Skil          | 20482  | 3    | 30508258  | 30530416  | +    |
| 7973 | 1420139_s_at | Region | Hrb2          | 52705  | 10   | 111675789 | 111690089 | +    |
| 7974 | 1416280_at   | Region | Uble1b        | 50995  | 7    | 29294488  | 29322320  | -    |
| 7975 | 1446565_at   | Region | Man1b         | 17156  | 3    | 99992328  | 100111138 | -    |
| 7976 | 1433874_at   | Region | Ssh1          | 231637 | 5    | 113052863 | 113104401 | -    |
| 7977 | 1446031_at   | Region | None          | None   | NONE | NONE      | NONE      | NONE |
| 7978 | 1447117_at   | Region | Lrrtm1        | 74342  | 6    | 77592843  | 77607877  | +    |
| 7979 | 1441507_at   | Region | Spnb2         | 20742  | 11   | 29995224  | 30114564  | -    |
| 7980 | 1447411_at   | Region | Ugdh          | 22235  | 5    | 64215050  | 64237671  | -    |
| 7981 | 1441412_s_at | Region | Trim45        | 229644 | 3    | 100348526 | 100359922 | +    |
| 7982 | 1446143_at   | Region | Myst3         | 244349 | 8    | 21614114  | 21695221  | +    |
| 7983 | 1451428_x_at | Region | Egfl7         | 353156 | 2    | 26513245  | 26524844  | +    |
| 7984 | 1447443_at   | Region | None          | None   | 10   | 60067731  | 60068134  | +    |
| 7985 | 1417742_a_at | Region | Dmap1         | 66233  | 4    | 116633591 | 116641130 | -    |
| 7986 | 1443426_at   | Region | 5730555F13Rik | 66660  | 9    | 70720790  | 70732757  | +    |
| 7987 | 1441891_x_at | Region | Elov17        | 74559  | 13   | 104441513 | 104512532 | +    |
| 7988 | 1434236_at   | Region | Zdhhc20       | 75965  | 14   | 52372502  | 52425052  | -    |
| 7989 | 1447897_x_at | Region | Anapc11       | 66156  | 11   | 120419572 | 120429291 | +    |
| 7990 | 1443257_at   | Region | 9630050E16Rik | 320168 | 14   | 40566715  | 40567128  | -    |
| 7991 | 1458397_at   | Region | ---           | 433696 | 4    | 40858910  | 40859528  | -    |
| 7992 | 1435702_s_at | Region | Ywhae         | 22627  | 11   | 75458597  | 75491496  | +    |
| 7993 | 1426240_at   | Region | Chmp4b        | 75608  | 2    | 154114001 | 154151720 | +    |
| 7994 | 1448173_a_at | Region | Top3b         | 21976  | 16   | 15641732  | 15663698  | +    |
| 7995 | 1446240_at   | Region | Map2k5        | 23938  | 9    | 63284916  | 63498276  | -    |
| 7996 | 1457264_at   | Region | Phf2011       | 239510 | 15   | 66601624  | 66648123  | +    |
| 7997 | 1444194_at   | Region | Mlit10        | 17354  | 2    | 18097281  | 18254400  | +    |
| 7998 | 1449150_at   | Region | A930040G15Rik | 77827  | 6    | 48528544  | 48549779  | +    |

|      |              |        |               |        |      |           |           |      |
|------|--------------|--------|---------------|--------|------|-----------|-----------|------|
| 7999 | 1433650_at   | Region | Haghl         | 68977  | 17   | 23588825  | 23591333  | -    |
| 8000 | 1454932_at   | Region | Rcor1         | 217864 | 12   | 106514818 | 106586780 | +    |
| 8001 | 1433810_x_at | Region | None          | None   | 11   | 106601570 | 106603057 | -    |
| 8002 | 1442245_at   | Region | Carm1         | 59035  | 9    | 21456863  | 21476863  | +    |
| 8003 | 1448394_at   | Region | Myl2          | 17906  | 5    | 121253338 | 121259202 | +    |
| 8004 | 1450680_at   | Region | Rag1          | 19373  | 2    | 101342965 | 101354184 | -    |
| 8005 | 1417300_at   | Region | Smpdl3b       | 100340 | 4    | 131693865 | 131718070 | -    |
| 8006 | 1421636_at   | Region | 9030605E16Rik | 75757  | X    | 133248091 | 133250428 | -    |
| 8007 | 1431511_at   | Region | 9230110F15Rik | 77080  | 9    | 35750788  | 35756609  | -    |
| 8008 | 1416185_a_at | Region | Adh5          | 11532  | 3    | 137332399 | 137344734 | +    |
| 8009 | 1429560_at   | Region | MGI:3028594   | 77652  | 17   | 30988427  | 31006091  | +    |
| 8010 | 1424048_a_at | Region | Nqo3a2        | 72017  | 1    | 134256253 | 134262001 | +    |
| 8011 | 1430672_at   | Region | 5033418A18Rik | 75961  | X    | 42962347  | 42963908  | -    |
| 8012 | 1433622_at   | Region | Gemin4        | 276919 | 11   | 75936229  | 75943170  | -    |
| 8013 | 1415867_at   | Region | Cct4          | 12464  | 11   | 22885383  | 22898126  | +    |
| 8014 | 1422804_at   | Region | Serpinh6b     | 20708  | 13   | 32445135  | 32458659  | +    |
| 8015 | 1428010_at   | Region | Timm10        | 30056  | 12   | 67958182  | 67971658  | -    |
| 8016 | 1434413_at   | Region | Igf1          | 16000  | 10   | 87833042  | 87904980  | +    |
| 8017 | 1433821_at   | Region | 1110012D08Rik | 73827  | 10   | 128537126 | 128541460 | -    |
| 8018 | 1452018_at   | Region | Nkx2-6        | 18092  | 14   | 63705608  | 63709129  | +    |
| 8019 | 1434189_at   | Region | Stag1         | 20842  | 9    | 100545170 | 100860091 | +    |
| 8020 | 1451391_at   | Region | 2700050L05Rik | 214764 | 7    | 128005358 | 128040623 | +    |
| 8021 | 1445553_at   | Region | E130307J04Rik | 320360 | 7    | 102899682 | 102936254 | -    |
| 8022 | 1425654_a_at | Region | D15Ert366e    | 65970  | 15   | 99835724  | 99877288  | -    |
| 8023 | 1437896_at   | Region | 2700088M22Rik | 67197  | 15   | 93452324  | 93464501  | -    |
| 8024 | 1432673_at   | Region | 2300010F08Rik | 71875  | 4    | 29110389  | 29112459  | +    |
| 8025 | 1416651_at   | Region | Znhit2        | 29805  | 19   | 5849997   | 5851258   | +    |
| 8026 | 1418192_at   | Region | Mnt           | 17428  | 11   | 74556582  | 74571368  | +    |
| 8027 | 1444156_at   | Region | 9230112E08Rik | 320800 | 2    | 180701190 | 180702549 | +    |
| 8028 | 1448897_at   | Region | Mkxn2         | 67027  | 6    | 116039545 | 116056254 | +    |
| 8029 | 1460275_at   | Region | Gpr3          | 14748  | 4    | 132170265 | 132172756 | -    |
| 8030 | 1446358_at   | Region | Bai3          | 210933 | 1    | 25316949  | 26075533  | -    |
| 8031 | 1459488_at   | Region | None          | None   | 14   | 69633569  | 69634167  | +    |
| 8032 | 1429557_at   | Region | Mcm8          | 66634  | 2    | 132330188 | 132358050 | +    |
| 8033 | 1426405_at   | Region | Rnf11         | 29864  | 4    | 108411762 | 108435410 | -    |
| 8034 | 1434546_at   | Region | BC024683      | 229512 | 3    | 88079530  | 88106201  | +    |
| 8035 | 1426897_at   | Region | Rcc2          | 108911 | 4    | 139582803 | 139602736 | +    |
| 8036 | 1425747_at   | Region | Dock5         | 277133 | 14   | 62284170  | 62343871  | -    |
| 8037 | 1435418_at   | Region | Slc22a8       | 19879  | 19   | 7787836   | 7808381   | +    |
| 8038 | 1446758_at   | Region | Bre           | 107976 | 5    | 30156988  | 30543677  | +    |
| 8039 | 1425806_a_at | Region | Surb7         | 108098 | 6    | 147563269 | 147571290 | +    |
| 8040 | 1447365_at   | Region | None          | None   | 19   | 37655577  | 37656014  | +    |
| 8041 | 1440653_at   | Region | Phip          | 83946  | 9    | 83198955  | 83305205  | -    |
| 8042 | 1427569_a_at | Region | Utrn          | 22288  | 10   | 12263109  | 12646998  | -    |
| 8043 | 1428121_at   | Region | 2610528K11Rik | 72543  | 2    | 33662118  | 33820108  | -    |
| 8044 | 1457541_at   | Region | LOC434756     | 434756 | X    | 31771254  | 31789396  | -    |
| 8045 | 1417326_a_at | Region | Anapc11       | 66156  | 11   | 120419572 | 120429291 | +    |
| 8046 | 1436285_at   | Region | 4933409I22    | 244608 | 8    | 94812404  | 94837431  | +    |
| 8047 | 1443151_at   | Region | None          | None   | NONE | NONE      | NONE      | NONE |
| 8048 | 1431153_at   | Region | E530011G23Rik | 319856 | 12   | 84989756  | 84991612  | +    |
| 8049 | 1454060_a_at | Region | Nras          | 18176  | 3    | 102486135 | 102496241 | +    |
| 8050 | 1442114_at   | Region | Xab1          | 74254  | 5    | 29953699  | 29970565  | +    |
| 8051 | 1453601_at   | Region | 5430400N05Rik | 209225 | 7    | 73831628  | 73891602  | +    |
| 8052 | 1420653_at   | Region | Tgfb1         | 21803  | 7    | 20851917  | 20869779  | +    |
| 8053 | 1456324_at   | Region | 2610014M12Rik | 212276 | 13   | 64146690  | 64154874  | -    |
| 8054 | 1453609_s_at | Region | Ccdc9         | 243846 | 7    | 740       | 2049      | -    |
| 8055 | 1422709_a_at | Region | Wdr46         | 57315  | 17   | 31644466  | 31653438  | +    |
| 8056 | 1451570_a_at | Region | 6720467C03Rik | 68099  | 4    | 12080689  | 12098962  | -    |
| 8057 | 1460153_at   | Region | Abi2          | 329165 | 1    | 60713087  | 60784447  | +    |
| 8058 | 1449554_at   | Region | Tle3          | 21887  | 9    | 61493517  | 61536829  | +    |
| 8059 | 1433762_at   | Region | C630043F03Rik | 68285  | 4    | 71293960  | 71295103  | +    |
| 8060 | 1447934_at   | Region | 9630033F20Rik | 319801 | 6    | 127760801 | 127782742 | -    |
| 8061 | 1453451_at   | Region | 6820402I19Rik | 74509  | 14   | 17218594  | 17220328  | -    |
| 8062 | 1429474_at   | Region | Zadh1         | 77219  | 12   | 81153770  | 81182471  | +    |
| 8063 | 1421146_at   | Region | Rapgef1       | 107746 | 2    | 29551925  | 29670492  | +    |



|      |              |        |                   |        |    |           |           |   |
|------|--------------|--------|-------------------|--------|----|-----------|-----------|---|
| 8064 | 1437939_s_at | Region | Ctsc              | 13032  | 7  | 82254582  | 82287335  | + |
| 8065 | 1442651_at   | Region | Wwox              | 80707  | 8  | 113753199 | 114666211 | + |
| 8066 | 1456600_a_at | Region | Rnf7              | 19823  | 9  | 96369942  | 96420174  | - |
| 8067 | 1446732_at   | Region | None              | None   | 4  | 145974668 | 145975287 | + |
| 8068 | 1433886_at   | Region | Eif2b5            | 224045 | 16 | 19270969  | 19281464  | + |
| 8069 | 1458040_at   | Region | None              | None   | 7  | 103971736 | 103972474 | - |
| 8070 | 1427533_at   | Region | Als2cl            | 235633 | 9  | 110921471 | 110941821 | + |
| 8071 | 1433571_at   | Region | A130038L21Rik     | 218442 | 13 | 88778759  | 88896020  | + |
| 8072 | 1437039_at   | Region | Cops2             | 12848  | 2  | 125345452 | 125372846 | - |
| 8073 | 1452835_a_at | Region | Polrmt            | 216151 | 10 | 79858754  | 79869197  | - |
| 8074 | 1436036_at   | Region | Whsc1             | 107823 | 5  | 32384228  | 32386230  | + |
| 8075 | 1457355_at   | Region | None              | None   | 12 | 40969014  | 40969986  | + |
| 8076 | 1424355_a_at | Region | Sin3b             | 20467  | 8  | 71873343  | 71907207  | + |
| 8077 | 1432924_at   | Region | 2810404I24Rik     | 76949  | 19 | 42110442  | 42112369  | + |
| 8078 | 1448313_at   | Region | Cln2              | 12751  | 7  | 99859499  | 99866859  | - |
| 8079 | 1452622_a_at | Region | Tradd             | 71609  | 8  | 104554167 | 104556311 | - |
| 8080 | 1445566_at   | Region | Centb2            | 78618  | 16 | 29953373  | 29953905  | - |
| 8081 | 1450401_at   | Region | Ncoa6ip           | 116940 | 4  | 3502044   | 3543770   | + |
| 8082 | 1456002_at   | Region | Xpa               | 22590  | 4  | 46091161  | 46112233  | - |
| 8083 | 1441976_at   | Region | Rnf19             | 30945  | 15 | 36241202  | 36267284  | - |
| 8084 | 1437206_at   | Region | 2900045N06Rik     | 72895  | 6  | 113640716 | 113716498 | + |
| 8085 | 1459900_at   | Region | C79468            | 97294  | 6  | 55041125  | 55042294  | + |
| 8086 | 1444632_at   | Region | None              | None   | 6  | 129694506 | 129695564 | + |
| 8087 | 1417526_at   | Region | Pcbp3             | 59093  | 10 | 76863181  | 76993973  | - |
| 8088 | 1421518_at   | Region | Kcns1             | 16538  | 2  | 163621274 | 163628058 | - |
| 8089 | 1420546_at   | Region | Th                | 21823  | 7  | 137305795 | 137312985 | - |
| 8090 | 1426746_at   | Region | 1810026J23Rik     | 69773  | 9  | 21480123  | 21486981  | + |
| 8091 | 1454944_at   | Region | Hic2              | 58180  | 16 | 16025980  | 16032597  | + |
| 8092 | 1422744_at   | Region | Phka1             | 18679  | X  | 97117039  | 97245563  | - |
| 8093 | 1421981_at   | Region | Kcnc3             | 16504  | 7  | 38665933  | 38671377  | + |
| 8094 | 1437829_s_at | Region | Eef2k             | 13631  | 7  | 114718450 | 114779568 | + |
| 8095 | 1445689_at   | Region | Rbms1             | 56878  | 2  | 60608122  | 60818320  | - |
| 8096 | 1441200_at   | Region | Klf3              | 16599  | 5  | 63601098  | 63627704  | + |
| 8097 | 1436269_s_at | Region | Prss25            | 64704  | 6  | 49801     | 53090     | - |
| 8098 | 1428575_at   | Region | Fcho1             | 74015  | 8  | 70858707  | 70875819  | - |
| 8099 | 1428634_at   | Region | Twistnb           | 28071  | 12 | 30039599  | 30048310  | + |
| 8100 | 1445697_at   | Region | ---               | 270387 |    | 1619156   | 1619474   | - |
| 8101 | 1416805_at   | Region | 1110032E23Rik     | 68659  | 3  | 79616111  | 79673508  | + |
| 8102 | 1419404_s_at | Region | Siah1a /// Siah1b | 20437  | 8  | 86007609  | 86029536  | - |
| 8103 | 1416324_s_at | Region | 2410004N11Rik     | 66989  | 17 | 26754605  | 26771684  | + |
| 8104 | 1423887_a_at | Region | 1200003M09Rik     | 71718  | 17 | 22905428  | 22921626  | - |
| 8105 | 1456624_at   | Region | D11Ert498e        | 52639  | 11 | 109394610 | 109432478 | - |
| 8106 | 1453636_at   | Region | Pcgf5             | 76073  | 19 | 35721737  | 35798874  | + |
| 8107 | 1430590_at   | Region | 2810009O15Rik     | 73852  | 3  | 41247547  | 41261082  | + |
| 8108 | 1428091_at   | Region | Klhl7             | 52323  | 5  | 22564507  | 22624682  | + |
| 8109 | 1448016_at   | Region | None              | None   | 3  | 115398610 | 115399916 | + |
| 8110 | 1440302_at   | Region | Slc25a3           | 18674  | 10 | 91087904  | 91095289  | - |
| 8111 | 1433977_at   | Region | Hs3st3b1          | 54710  | 11 | 63614682  | 63647884  | - |
| 8112 | 1442622_at   | Region | Strbp             | 20744  | 2  | 37415390  | 37579381  | - |
| 8113 | 1423565_at   | Region | Paics             | 67054  | 5  | 76195870  | 76211964  | + |
| 8114 | 1451789_a_at | Region | Ryk               | 20187  | 9  | 102804509 | 102877376 | + |
| 8115 | 1451390_s_at | Region | 1110060O18Rik     | 68818  | 1  | 75456524  | 75459403  | + |
| 8116 | 1450882_s_at | Region | Tm7sf1            | 83924  | 13 | 12777506  | 12812482  | - |
| 8117 | 1434411_at   | Region | None              | None   | 9  | 79804293  | 79805243  | - |
| 8118 | 1430279_at   | Region | 3110038A09Rik     | 73126  | 18 | 31873754  | 31874286  | - |
| 8119 | 1427920_at   | Region | Phf19             | 74016  | 2  | 34825917  | 34846138  | - |
| 8120 | 1423012_at   | Region | Syt7              | 54525  | 19 | 9585980   | 9644941   | + |
| 8121 | 1448128_at   | Region | Ppgb              | 19025  | 2  | 164290539 | 164297765 | + |
| 8122 | 1451168_a_at | Region | Arhgdia           | 192662 | 11 | 120399205 | 120402340 | - |
| 8123 | 1453920_a_at | Region | Mospd2            | 76763  | X  | 158535574 | 158579740 | - |
| 8124 | 1425309_at   | Region | Catsper2          | 212670 | 2  | 120908208 | 120927384 | - |
| 8125 | 1422883_at   | Region | Usp8              | 84092  | 2  | 126221216 | 126273150 | + |
| 8126 | 1428191_s_at | Region | D14Ert4209e       | 52535  | 14 | 46979197  | 46986291  | + |
| 8127 | 1424578_at   | Region | Arrdc1            | 215705 | 2  | 24857514  | 24867325  | - |
| 8128 | 1448385_at   | Region | Slc15a4           | 100561 | 5  | 126762650 | 126784376 | - |

## 2610510B01Rik ///

|      |              |        |               |        |      |           |           |      |
|------|--------------|--------|---------------|--------|------|-----------|-----------|------|
| 8129 | 1449904_at   | Region | LOC547290     | 547290 | 16   | 1165278   | 1193622   | -    |
| 8130 | 1430025_at   | Region | Ppp3cc        | 19057  | 14   | 64533887  | 64605438  | -    |
| 8131 | 1424665_at   | Region | 5430405G24Rik | 237943 | 11   | 102298304 | 102329534 | -    |
| 8132 | 1421395_at   | Region | Zik1          | 22775  | 7    | 8786037   | 8794152   | -    |
| 8133 | 1422516_a_at | Region | Fibp          | 58249  | 19   | 5249484   | 5253784   | +    |
| 8134 | 1458493_a_at | Region | None          | None   | 8    | 6403706   | 6404162   | -    |
| 8135 | 1445037_at   | Region | 6430510B20Rik | 320025 | 5    | 113863874 | 113864707 | -    |
| 8136 | 1457954_at   | Region | None          | None   | 4    | 8794230   | 8794757   | -    |
| 8137 | 1427638_at   | Region | Zbtb16        | 235320 | 9    | 48684510  | 48863820  | -    |
| 8138 | 1460171_at   | Region | Cops5         | 26754  | 1    | 10129944  | 10143020  | -    |
| 8139 | 1424078_s_at | Region | Pex6          | 224824 | 17   | 44222425  | 44236648  | +    |
| 8140 | 1451819_at   | Region | Zswim6        | 67263  | 13   | 103950578 | 104158812 | -    |
| 8141 | 1422888_at   | Region | Rnf5          | 54197  | 17   | 32303550  | 32306102  | -    |
| 8142 | 1457760_at   | Region | A930004J17Rik | 319635 | 4    | 130676253 | 130677249 | +    |
| 8143 | 1430966_at   | Region | Cml3          | 93674  | 6    | 86243280  | 86244659  | -    |
| 8144 | 1438530_at   | Region | Tfpi          | 21788  | 2    | 84130609  | 84171923  | -    |
| 8145 | 1435234_at   | Region | Ncoa2         | 17978  | 1    | 13272503  | 13507008  | -    |
| 8146 | 1459707_at   | Region | Pacs1         | 107975 | 19   | 4922475   | 5061909   | -    |
| 8147 | 1439888_at   | Region | None          | None   | 1    | 192593007 | 192595716 | +    |
| 8148 | 1416477_at   | Region | Ube2d2        | 56550  | 18   | 35995272  | 36030828  | +    |
| 8149 | 1425074_at   | Region | Wrn           | 22427  | 8    | 32039864  | 32191103  | -    |
| 8150 | 1448849_at   | Region | Mrpl40        | 18100  | 16   | 17643267  | 17647687  | -    |
| 8151 | 1423143_at   | Region | Gtpbp4        | 69237  | 13   | 8956055   | 8979603   | -    |
| 8152 | 1445949_at   | Region | Tnfrsf19      | 29820  | 14   | 55499179  | 55581612  | -    |
| 8153 | 1432997_at   | Region | 5830462P14Rik | 76098  | 14   | 60791949  | 60793605  | -    |
| 8154 | 1425824_a_at | Region | Pcsk4         | 18551  | 10   | 80446311  | 80454484  | -    |
| 8155 | 1458811_at   | Region | 9430047L24Rik | 320850 | 3    | 140465086 | 140465921 | +    |
| 8156 | 1447176_at   | Region | A930008G19Rik | 77938  | 7    | 127078161 | 127179580 | -    |
| 8157 | 1435182_at   | Region | C530028I08Rik | 232933 | 7    | 15760799  | 15780242  | -    |
| 8158 | 1453308_at   | Region | 8430429K09Rik | 71523  | 11   | 3347259   | 3353126   | +    |
| 8159 | 1417228_at   | Region | Capn1         | 12333  | 19   | 5777335   | 5803941   | -    |
| 8160 | 1441367_a_at | Region | None          | None   | NONE | NONE      | NONE      | NONE |
| 8161 | 1455002_at   | Region | Ptp4a1        | 19243  | 1    | 31213857  | 31222010  | -    |
| 8162 | 1443240_at   | Region | Gpc3          | 14734  | X    | 46793222  | 47134717  | -    |
| 8163 | 1432236_a_at | Region | Suv39h1       | 20937  | X    | 6300242   | 6313526   | -    |
| 8164 | 1415936_at   | Region | Bcar3         | 29815  | 3    | 121200933 | 121310740 | +    |
| 8165 | 1429464_at   | Region | Prkaa2        | 108079 | 4    | 103993895 | 104068774 | -    |
| 8166 | 1440253_at   | Region | None          | None   | 11   | 80198613  | 80198903  | +    |
| 8167 | 1436580_at   | Region | D8ErtD354e    | 52120  | 8    | 24669208  | 24671231  | -    |
| 8168 | 1452272_a_at | Region | Gfer          | 11692  | 17   | 22498277  | 22501235  | -    |
| 8169 | 1451108_at   | Region | Rnf185        | 193670 | 11   | 3310770   | 3347112   | -    |
| 8170 | 1451102_at   | Region | Cnot8         | 69125  | 11   | 57829782  | 57844223  | +    |
| 8171 | 1433923_at   | Region | Krt2-39       | 406220 | 15   | 101918318 | 101928080 | -    |
| 8172 | 1441912_x_at | Region | C2            | 12263  | 17   | 32565421  | 32584866  | -    |
| 8173 | 1439072_at   | Region | Slc1a3        | 20512  | 15   | 8424368   | 8500974   | -    |
| 8174 | 1418928_a_at | Region | 2310038H17Rik | 67099  | 1    | 64900564  | 64911252  | -    |
| 8175 | 1423862_at   | Region | Plekhd2       | 71801  | 4    | 10915627  | 10934525  | -    |
| 8176 | 1418432_at   | Region | Cab39         | 12283  | 1    | 85601719  | 85656721  | +    |
| 8177 | 1419047_at   | Region | Pcnx          | 54604  | 12   | 78720867  | 78861705  | +    |
| 8178 | 1441428_at   | Region | None          | None   | 1    | 51808112  | 51808751  | -    |
| 8179 | 1420660_at   | Region | Lrrc6         | 54562  | 15   | 66403753  | 66524736  | -    |
| 8180 | 1447349_s_at | Region | Ep400         | 75560  | 5    | 109714361 | 109820853 | -    |
| 8181 | 1426592_a_at | Region | Fbxo22        | 71999  | 9    | 55320406  | 55335959  | +    |
| 8182 | 1416726_s_at | Region | Ube2s         | 77891  | 7    | 4053868   | 4058194   | -    |
| 8183 | 1419913_at   | Region | Strap         | 20901  | 6    | 138527082 | 138543054 | +    |
| 8184 | 1417449_at   | Region | Pte1          | 170789 | 2    | 164249501 | 164261605 | -    |
| 8185 | 1427043_s_at | Region | Cova1         | 209224 | X    | 43531318  | 43809038  | -    |
| 8186 | 1453274_at   | Region | 1700039D13Rik | 73293  | 11   | 102702333 | 102706304 | +    |
| 8187 | 1453433_at   | Region | 2600001A11Rik | 72338  | 12   | 72487759  | 72525892  | -    |
| 8188 | 1424098_at   | Region | Elovl7        | 74559  | 13   | 104441513 | 104512532 | +    |
| 8189 | 1436498_at   | Region | Arih1         | 23806  | 9    | 59509355  | 59603044  | -    |
| 8190 | 1441210_at   | Region | Myo1b         | 17912  | 1    | 52050933  | 52208258  | -    |
| 8191 | 1416622_at   | Region | Wbscr16       | 94254  | 5    | 133439452 | 133468143 | -    |
| 8192 | 1434695_at   | Region | None          | None   | 1    | 191273729 | 191274488 | -    |

|      |              |        |               |        |      |           |           |      |
|------|--------------|--------|---------------|--------|------|-----------|-----------|------|
| 8193 | 1460123_at   | Region | Gpr1          | 241070 | 1    | 63475709  | 63507227  | -    |
| 8194 | 1433814_at   | Region | None          | None   | 6    | 119909753 | 119910437 | -    |
| 8195 | 1429485_a_at | Region | Utp11l        | 67205  | 4    | 123705877 | 123720667 | -    |
| 8196 | 1422787_at   | Region | Fkbpl         | 56299  | 17   | 32348153  | 32349597  | +    |
| 8197 | 1423680_at   | Region | Fads1         | 76267  | 19   | 9379470   | 9393371   | +    |
| 8198 | 1458538_at   | Region | Sirt1         | 93759  | 10   | 63283769  | 63303800  | -    |
| 8199 | 1445514_at   | Region | Vh1h          | 22346  | 6    | 114191852 | 114199465 | +    |
| 8200 | 1435139_at   | Region | Narg1         | 74838  | 3    | 51048093  | 51105995  | +    |
| 8201 | 1454616_at   | Region | 5730410I19Rik | 66622  | 12   | 98203846  | 98224080  | +    |
| 8202 | 1424096_at   | Region | Krt2-5        | 110308 | 15   | 101765532 | 101771353 | -    |
| 8203 | 1416860_s_at | Region | Ing1          | 26356  | 8    | 10928492  | 10935676  | +    |
| 8204 | 1420865_at   | Region | Zfp161        | 22666  | 17   | 67159059  | 67165625  | +    |
| 8205 | 1455117_at   | Region | BC062185      | 215112 | 10   | 53781786  | 53794040  | -    |
| 8206 | 1443490_at   | Region | D3Erd34e      | 52061  | 3    | 89892447  | 89893008  | +    |
| 8207 | 1430928_at   | Region | 2900002J02Rik | 70412  | 19   | 19823384  | 19824928  | +    |
| 8208 | 1438999_a_at | Region | Nfat5         | 54446  | 8    | 106591549 | 106677210 | +    |
| 8209 | 1449162_at   | Region | Pop7          | 74097  | 5    | 136452305 | 136453297 | -    |
| 8210 | 1420384_at   | Region | Col4a3bp      | 68018  | 13   | 92734071  | 92828876  | +    |
| 8211 | 1455253_at   | Region | 4930535B03Rik | 75137  | 3    | 95249480  | 95306695  | -    |
| 8212 | 1426512_at   | Region | Olfm3         | 229759 | 3    | 113850919 | 113895474 | +    |
| 8213 | 1434346_at   | Region | None          | None   | 10   | 62970027  | 62970706  | +    |
| 8214 | 1453298_at   | Region | Ptpn21        | 24000  | 12   | 94103584  | 94161513  | -    |
| 8215 | 1460619_at   | Region | 4931419K03Rik | 211798 | 1    | 41069152  | 41088661  | -    |
| 8216 | 1442645_at   | Region | Atp2b3        | 320707 | X    | 68163741  | 68231660  | +    |
| 8217 | 1440301_at   | Region | None          | None   | 11   | 53291814  | 53292501  | +    |
| 8218 | 1441880_x_at | Region | MGC30332      | 101883 | 7    | 25978772  | 25980651  | +    |
| 8219 | 1440332_at   | Region | Cdv3          | 321022 | 9    | 103328549 | 103340979 | -    |
| 8220 | 1420853_at   | Region | Sdc3          | 20970  | 4    | 129589463 | 129623202 | +    |
| 8221 | 1440482_at   | Region | Vps13a        | 271564 | 19   | 15859308  | 15865745  | -    |
| 8222 | 1441439_at   | Region | Ucn3          | 83428  | 13   | 3825536   | 3826030   | -    |
| 8223 | 1429366_at   | Region | Lrrc34        | 71827  | 3    | 30034945  | 30055642  | -    |
| 8224 | 1427524_a_at | Region | 4930548G07Rik | 75339  | 14   | 51190396  | 51219682  | +    |
| 8225 | 1428557_a_at | Region | Osgepl1       | 72085  | 1    | 53621177  | 53631578  | +    |
| 8226 | 1416254_a_at | Region | Vps16         | 80743  | 2    | 129938242 | 129957587 | +    |
| 8227 | 1446518_at   | Region | Rock1         | 19877  | 18   | 10112811  | 10226661  | -    |
| 8228 | 1441991_at   | Region | BC039632      | 330657 | 7    | 121935704 | 121939069 | -    |
| 8229 | 1439301_at   | Region | Rad51l1       | 19363  | 12   | 76156299  | 76675619  | +    |
| 8230 | 1439704_at   | Region | Hdac2         | 15182  | 10   | 37046787  | 37075975  | +    |
| 8231 | 1422122_at   | Region | Fcer2a        | 14128  | 8    | 3029641   | 3042078   | -    |
| 8232 | 1440958_at   | Region | None          | None   | 15   | 81736920  | 81745417  | -    |
| 8233 | 1429664_at   | Region | Cdk1l         | 71091  | 12   | 66578318  | 66622177  | -    |
| 8234 | 1420749_a_at | Region | Pou6f1        | 19009  | 15   | 100632856 | 100643903 | -    |
| 8235 | 1452873_at   | Region | 5830415F09Rik | 74753  | 4    | 46295973  | 46308520  | -    |
| 8236 | 1430608_at   | Region | 4930535I16Rik | 75220  | 4    | 122943098 | 122945136 | -    |
| 8237 | 1451516_at   | Region | Rhebl1        | 69159  | 15   | 98935597  | 98939379  | -    |
| 8238 | 1433384_at   | Region | 9330199C07Rik | 77245  | 14   | 37072410  | 37073349  | +    |
| 8239 | 1452778_x_at | Region | Nap1l1        | 53605  | 10   | 111105541 | 111122931 | +    |
| 8240 | 1447311_at   | Region | Slc6a2        | 20538  | 8    | 92248264  | 92288701  | +    |
| 8241 | 1441024_at   | Region | None          | None   | 5    | 52930353  | 52931195  | +    |
| 8242 | 1419075_s_at | Region | Saa1          | 20208  | 7    | 40825847  | 40828328  | -    |
| 8243 | 1459195_at   | Region | None          | None   | 6    | 40198225  | 40198593  | +    |
| 8244 | 1427149_at   | Region | Plekha6       | 240753 | 1    | 133120188 | 133162992 | +    |
| 8245 | 1447987_at   | Region | D030041N04Rik | 270035 | 8    | 24316834  | 24322553  | -    |
| 8246 | 1432950_at   | Region | 5330421F21Rik | 78288  | 4    | 86010044  | 86011838  | -    |
| 8247 | 1438083_at   | Region | Hhip          | 15245  | 8    | 79185726  | 79272113  | -    |
| 8248 | 1449045_at   | Region | Afg3l1        | 114896 | 8    | 122852829 | 122876449 | +    |
| 8249 | 1447935_at   | Region | C730036B14Rik | 104806 | 12   | 61853297  | 61909946  | +    |
| 8250 | 1420661_a_at | Region | 4933439F18Rik | 66771  | 11   | 60142945  | 60170919  | +    |
| 8251 | 1456891_at   | Region | A930010I20Rik | 329727 | 3    | 102555072 | 102597254 | +    |
| 8252 | 1448878_at   | Region | Mxd3          | 17121  | 13   | 53934348  | 53938588  | -    |
| 8253 | 1455286_at   | Region | Btbd1         | 83962  | 7    | 75600213  | 75626398  | -    |
| 8254 | 1421066_at   | Region | Jak2          | 16452  | 19   | 28505054  | 28564581  | +    |
| 8255 | 1451841_a_at | Region | Ncor2         | 20602  | 5    | 124178459 | 124286279 | -    |
| 8256 | 1443203_at   | Region | Zfhx1a        | 21417  | 18   | 5709786   | 5817483   | +    |
| 8257 | 1440459_at   | Region | None          | None   | NONE | NONE      | NONE      | NONE |

|      |              |        |               |        |    |           |           |   |
|------|--------------|--------|---------------|--------|----|-----------|-----------|---|
| 8258 | 1449567_at   | Region | Tktl1         | 83553  | X  | 68837939  | 68869146  | + |
| 8259 | 1438076_at   | Region | Rpl30         | 19946  | 15 | 34440221  | 34442933  | - |
| 8260 | 1435898_x_at | Region | Gdi3          | 14569  | 13 | 3422528   | 3450201   | + |
| 8261 | 1431169_at   | Region | D230012E17Rik | 241062 | 1  | 54784800  | 54786464  | - |
| 8262 | 1439053_at   | Region | Hnrph3        | 107938 | 10 | 62988787  | 62989452  | + |
| 8263 | 1458190_at   | Region | Arhgap4       | 171207 | X  | 68555013  | 68571884  | - |
| 8264 | 1453381_at   | Region | C030033M12Rik | 77334  | 7  | 91737559  | 91739054  | + |
| 8265 | 1451805_at   | Region | Phip          | 83946  | 9  | 83198955  | 83305205  | - |
| 8266 | 1458958_at   | Region | Nope          | 56741  | 9  | 65223736  | 65260207  | + |
| 8267 | 1421378_s_at | Region | Abcc1         | 17250  | 16 | 13097054  | 13210369  | + |
| 8268 | 1420253_at   | Region | D2Ertd63e     | 51845  | 2  | 167719665 | 167719911 | - |
| 8269 | 1418759_at   | Region | Ptpn20        | 19256  | 14 | 31735571  | 31773221  | + |
| 8270 | 1430357_at   | Region | H3f3b         | 15081  | 11 | 115843386 | 115845593 | - |
| 8271 | 1420015_s_at | Region | Ppt1          | 19063  | 4  | 121863367 | 121885494 | + |
| 8272 | 1418416_x_at | Region | Psg23         | 56868  | 7  | 781       | 5199      | + |
| 8273 | 1439005_x_at | Region | Ywhaz         | 22631  | 15 | 36773662  | 36797651  | - |
| 8274 | 1459369_at   | Region | Epha6         | 13840  | 16 | 58635452  | 59588354  | - |
| 8275 | 1417302_at   | Region | Rcor2         | 104383 | 19 | 6982928   | 6989070   | + |
| 8276 | 1433634_at   | Region | Irf2bp2       | 270110 | 8  | 125876185 | 125881321 | - |
| 8277 | 1435064_a_at | Region | Tmem27        | 57394  | X  | 157689592 | 157718264 | + |
| 8278 | 1428238_at   | Region | 2700059D21Rik | 433693 | 4  | 34689700  | 34705975  | + |
| 8279 | 1419488_at   | Region | Tnip2         | 231130 | 5  | 32984434  | 33002317  | - |
| 8280 | 1424587_at   | Region | BC023488      | 237221 | X  | 159769900 | 159789915 | + |
| 8281 | 1428651_at   | Region | 4930429H24Rik | 75785  | 16 | 18869169  | 18899359  | + |
| 8282 | 1460359_at   | Region | LOC434247     | 434247 | 7  | 122087459 | 122098021 | - |
| 8283 | 1425282_at   | Region | lbrdc2        | 218215 | 13 | 46720793  | 46844544  | + |
| 8284 | 1452954_at   | Region | Ube2c         | 68612  | 2  | 164226662 | 164229635 | + |
| 8285 | 1430366_at   | Region | 5430405H02Rik | 74487  | 2  | 156319009 | 156320028 | - |
| 8286 | 1437945_x_at | Region | Nap11         | 53605  | 10 | 111105541 | 111122931 | + |
| 8287 | 1422920_at   | Region | Cldn13        | 57255  | 5  | 133927742 | 133929018 | - |
| 8288 | 1457442_at   | Region | AW125324      | 104600 | 11 | 58080996  | 58081571  | + |
| 8289 | 1428598_at   | Region | Tbc1d7        | 67046  | 13 | 42714184  | 42733799  | - |
| 8290 | 1418173_at   | Region | 4631426H08Rik | 70810  | 11 | 99136931  | 99144028  | - |
| 8291 | 1440355_at   | Region | Kctd12b       | 207474 | X  | 147219550 | 147230676 | - |
| 8292 | 1427925_at   | Region | Stx17         | 67727  | 4  | 48040852  | 48099039  | + |
| 8293 | 1448096_at   | Region | None          | None   | 8  | 93324976  | 93325226  | + |
| 8294 | 1445576_at   | Region | 4930526H21Rik | 75136  | 5  | 142978696 | 143027241 | + |
| 8295 | 1439590_at   | Region | 4931440N07Rik | 381560 | 4  | 131685803 | 131693445 | - |
| 8296 | 1416943_at   | Region | Ube2e1        | 22194  | 14 | 16806204  | 16855591  | - |
| 8297 | 1423852_at   | Region | Tmem46        | 219134 | 14 | 54160371  | 54166718  | + |
| 8298 | 1416904_at   | Region | Mbnl1         | 56758  | 3  | 60179725  | 60308221  | + |
| 8299 | 1423480_at   | Region | 1500002M01Rik | 68979  | 11 | 106987749 | 107010349 | - |
| 8300 | 1459202_at   | Region | Cecr2         | 330409 | 6  | 121098395 | 121197332 | + |
| 8301 | 1438728_at   | Region | Nif3l1        | 65102  | 1  | 58752501  | 58767146  | + |
| 8302 | 1423184_at   | Region | Sh3d1B        | 20403  | 12 | 3775688   | 3876446   | + |
| 8303 | 1420221_at   | Region | 4930461P20Rik | 78244  | 15 | 10260892  | 10284727  | - |
| 8304 | 1424772_at   | Region | E130307C13    | 232440 | 6  | 137580120 | 137581870 | + |
| 8305 | 1428784_at   | Region | Gmip          | 78816  | 8  | 68958946  | 68972501  | + |
| 8306 | 1441788_s_at | Region | BC068171      | 245474 | X  | 69756509  | 69770234  | + |
| 8307 | 1460542_s_at | Region | Mdm4          | 17248  | 1  | 132851305 | 132886808 | - |
| 8308 | 1443832_s_at | Region | Sdpr          | 20324  | 1  | 51590070  | 51603904  | + |
| 8309 | 1423564_a_at | Region | Paics         | 67054  | 5  | 76195870  | 76211964  | + |
| 8310 | 1416545_at   | Region | Zdhhc7        | 102193 | 8  | 119437315 | 119456866 | - |
| 8311 | 1441607_at   | Region | AU015603      | 103336 | 10 | 29372014  | 29372610  | + |
| 8312 | 1450356_at   | Region | Trhr2         | 170732 | 8  | 121738554 | 121742333 | - |
| 8313 | 1429454_at   | Region | Gapvd1        | 66691  | 2  | 34609129  | 34687394  | - |
| 8314 | 1438560_x_at | Region | Cct4          | 12464  | 11 | 22885383  | 22898126  | + |
| 8315 | 1452402_at   | Region | Uchl3         | 50933  | 14 | 96180426  | 96270208  | + |
| 8316 | 1455749_x_at | Region | Ndufa7        | 66416  | 17 | 31523009  | 31536811  | + |
| 8317 | 1441997_at   | Region | Zfp184        | 193452 | 13 | 21425158  | 21440549  | + |
| 8318 | 1440904_at   | Region | Senp5         | 320213 | 16 | 30771924  | 30812542  | - |
| 8319 | 1426022_a_at | Region | Vill          | 22351  | 9  | 119047063 | 119065587 | + |
| 8320 | 1444437_at   | Region | Usp34         | 17847  | 11 | 23201764  | 23383978  | + |
| 8321 | 1452358_at   | Region | Rai2          | 24004  | X  | 155317032 | 155378898 | + |
| 8322 | 1445253_at   | Region | None          | None   | 19 | 11014740  | 11027754  | + |

|      |              |        |               |        |      |           |           |      |
|------|--------------|--------|---------------|--------|------|-----------|-----------|------|
| 8323 | 1441508_at   | Region | Sirt1         | 93759  | 10   | 63283769  | 63303800  | -    |
| 8324 | 1443922_at   | Region | None          | None   | 1    | 191873321 | 191874037 | -    |
| 8325 | 1447748_x_at | Region | Slc29a2       | 13340  | 19   | 4814896   | 4820754   | +    |
| 8326 | 1434390_at   | Region | Hnrpu         | 51810  | 1    | 178283700 | 178291584 | -    |
| 8327 | 1430558_at   | Region | Zfp318        | 57908  | 17   | 43894944  | 43929210  | +    |
|      |              |        | Ap3m1 ///     |        |      |           |           |      |
| 8328 | 1416375_at   | Region | LOC544716     | 544716 | 10   | 82473353  | 82475506  | +    |
| 8329 | 1433823_at   | Region | AW456874      | 218232 | 13   | 48175930  | 48223631  | -    |
| 8330 | 1425129_a_at | Region | Taldo1        | 21351  | 7    | 135794197 | 135804954 | +    |
| 8331 | 1458286_at   | Region | 0610007P14Rik | 58520  | 12   | 82685029  | 82694208  | -    |
| 8332 | 1460443_at   | Region | Brms1l        | 52592  | 12   | 52556120  | 52589380  | +    |
| 8333 | 1436567_a_at | Region | Ndufa7        | 66416  | 17   | 31523009  | 31536811  | +    |
| 8334 | 1442853_at   | Region | None          | None   | 17   | 22695374  | 22696427  | -    |
| 8335 | 1442969_at   | Region | None          | None   | NONE | NONE      | NONE      | NONE |
| 8336 | 1439499_at   | Region | AA415398      | 433752 | 4    | 118489213 | 118497674 | -    |
| 8337 | 1416679_at   | Region | Abcd3         | 19299  | 3    | 120537803 | 120594108 | -    |
| 8338 | 1437129_at   | Region | E330018D03Rik | 320319 | 19   | 45309292  | 45312279  | -    |
| 8339 | 1418900_at   | Region | Ufm1          | 67890  | 3    | 53489432  | 53497992  | -    |
| 8340 | 1426347_at   | Region | 2010321M09Rik | 69882  | 9    | 65083138  | 65108909  | +    |
| 8341 | 1454984_at   | Region | AW061234      | 106020 | 15   | 6984377   | 6985054   | +    |
| 8342 | 1450051_at   | Region | Atrx          | 22589  | X    | 100401518 | 100530707 | -    |
| 8343 | 1457232_at   | Region | Fbxl21        | 213311 | 13   | 55147303  | 55147813  | +    |
| 8344 | 1426888_at   | Region | Ehmt2         | 110147 | 17   | 32601358  | 32617827  | +    |
| 8345 | 1452365_at   | Region | 4732435N03Rik | 234356 | 8    | 67505844  | 67884445  | -    |
| 8346 | 1416447_at   | Region | Tmem30a       | 69981  | 9    | 79974649  | 79999130  | -    |
| 8347 | 1454848_at   | Region | Ppp1r12c      | 232807 | 7    | 3712775   | 3715587   | -    |
| 8348 | 1455795_at   | Region | Sart2         | 212898 | 10   | 34212320  | 34268478  | -    |
| 8349 | 1449432_a_at | Region | Mell1         | 27390  | 4    | 153361998 | 153387892 | +    |
| 8350 | 1434305_at   | Region | U2af114       | 233073 | 7    | 25976032  | 25978056  | +    |
| 8351 | 1436337_at   | Region | E030031F02Rik | 319689 | 5    | 9107480   | 9125785   | +    |
| 8352 | 1432367_a_at | Region | Ufd1l         | 22230  | 16   | 17583376  | 17606305  | +    |
| 8353 | 1437565_a_at | Region | Gnl2          | 230737 | 4    | 124057151 | 124082485 | +    |
| 8354 | 1425670_at   | Region | Rfxank        | 19727  | 8    | 69285462  | 69292088  | -    |
| 8355 | 1422041_at   | Region | Pilrb         | 170741 | 5    | 136802747 | 136808598 | -    |
| 8356 | 1455634_at   | Region | Son           | 20658  | 16   | 90805044  | 90836353  | +    |
| 8357 | 1424961_at   | Region | Tapbpl        | 213233 | 6    | 125880885 | 125888540 | -    |
| 8358 | 1455951_at   | Region | Mars          | 216443 | 10   | 127032863 | 127048276 | -    |
| 8359 | 1417433_at   | Region | Lypla2        | 26394  | 4    | 134849482 | 134853851 | -    |
| 8360 | 1447818_x_at | Region | Rhebl1        | 69159  | 15   | 98935597  | 98939379  | -    |
| 8361 | 1438662_at   | Region | LOC433810     | 433810 | 4    | 151865583 | 151878912 | -    |
| 8362 | 1416333_at   | Region | Dok2          | 13449  | 14   | 65090610  | 65094723  | +    |
| 8363 | 1455611_at   | Region | Pias1         | 56469  | 9    | 63002575  | 63103377  | -    |
| 8364 | 1448014_s_at | Region | Usp24         | 329908 | 4    | 105320122 | 105400231 | +    |
| 8365 | 1426860_at   | Region | Ep400         | 75560  | 5    | 109714361 | 109820853 | -    |
| 8366 | 1437722_x_at | Region | Pcbp3         | 59093  | 10   | 76863181  | 76993973  | -    |
| 8367 | 1457699_at   | Region | E330009J07Rik | 243780 | 6    | 40549078  | 40577713  | -    |
| 8368 | 1454091_at   | Region | Psg21         | 72242  | 7    | 917       | 1431      | -    |
| 8369 | 1441878_s_at | Region | 1810049H13Rik | 66431  | 11   | 120277697 | 120279156 | -    |
| 8370 | 1456107_x_at | Region | MGI:1336880   | 20624  | 11   | 102659566 | 102702006 | -    |
| 8371 | 1439567_at   | Region | Tbx3          | 21386  | 5    | 118821012 | 118834673 | +    |
|      |              |        | Tnfrsf19l /// |        |      |           |           |      |
| 8372 | 1455116_at   | Region | LOC434148     | 320100 | 7    | 94952524  | 94970071  | -    |
| 8373 | 1415677_at   | Region | Dhrs1         | 52585  | 14   | 50257036  | 50263603  | -    |
| 8374 | 1427617_at   | Region | Fut10         | 171167 | 8    | 29970150  | 30020391  | +    |
| 8375 | 1420487_at   | Region | Nol7          | 70078  | 13   | 42960833  | 42965301  | +    |
| 8376 | 1442552_at   | Region | Gm1118        | 382079 | 9    | 60306143  | 60628579  | -    |
| 8377 | 1460016_at   | Region | AW547186      | 209497 | X    | 136121461 | 136278281 | +    |
| 8378 | 1447229_x_at | Region | Zfp289        | 77038  | 2    | 90970055  | 90981680  | +    |
| 8379 | 1446657_at   | Region | None          | None   | NONE | NONE      | NONE      | NONE |
| 8380 | 1418637_at   | Region | Etv3          | 27049  | 3    | 87270684  | 87284681  | +    |
| 8381 | 1426784_at   | Region | Trim47        | 217333 | 11   | 115926852 | 115931301 | -    |
| 8382 | 1419355_at   | Region | Klf7          | 93691  | 1    | 64328681  | 64414407  | -    |
| 8383 | 1416048_at   | Region | Phc2          | 54383  | 4    | 127732109 | 127779987 | +    |
| 8384 | 1459088_at   | Region | C79557        | 97074  | 3    | 108318151 | 108319206 | +    |
| 8385 | 1450347_at   | Region | Syt10         | 54526  | 15   | 89835266  | 89894642  | -    |

|      |              |        |               |        |      |           |           |      |
|------|--------------|--------|---------------|--------|------|-----------|-----------|------|
| 8386 | 1451829_a_at | Region | Nf2           | 18016  | 11   | 4662781   | 4744337   | -    |
| 8387 | 1423815_at   | Region | Ddx56         | 52513  | 11   | 6152332   | 6162516   | -    |
| 8388 | 1416619_at   | Region | 4632428N05Rik | 74048  | 10   | 60305586  | 60331366  | +    |
| 8389 | 1442296_at   | Region | Wdr75         | 73674  | 1    | 46099251  | 46127299  | +    |
| 8390 | 1451860_a_at | Region | Trim30        | 20128  | 7    | 98521385  | 98577468  | -    |
| 8391 | 1442239_at   | Region | None          | None   | 18   | 50224256  | 50224814  | +    |
| 8392 | 1445490_at   | Region | C77805        | 97592  | NONE | NONE      | NONE      | NONE |
| 8393 | 1437586_at   | Region | Cnot4         | 53621  | 6    | 35139222  | 35227761  | -    |
| 8394 | 1454827_at   | Region | Pogz          | 229584 | 3    | 94341777  | 94368636  | +    |
| 8395 | 1444208_at   | Region | E030034C22Rik | 218880 | 14   | 29452210  | 29452780  | +    |
| 8396 | 1446305_at   | Region | LOC432657     | 432657 | 12   | 49495911  | 49497511  | +    |
| 8397 | 1437372_at   | Region | Cpsf6         | 432508 | 10   | 117044269 | 117045158 | -    |
| 8398 | 1429733_at   | Region | 2900016D05Rik | 72886  | 17   | 53597518  | 53606625  | +    |
| 8399 | 1454137_s_at | Region | Hfe2          | 69585  | 3    | 96013008  | 96017047  | +    |
| 8400 | 1447485_at   | Region | Gpr150        | 238725 | 13   | 72111960  | 72114105  | -    |
| 8401 | 1425514_at   | Region | Pik3r1        | 18708  | 13   | 97857040  | 97865195  | -    |
| 8402 | 1455129_at   | Region | Mtdh          | 67154  | 15   | 34082454  | 34141052  | +    |
| 8403 | 1440047_at   | Region | None          | None   | 16   | 9885498   | 9886159   | +    |
| 8404 | 1449439_at   | Region | Klf7          | 93691  | 1    | 64328681  | 64414407  | -    |
| 8405 | 1446150_at   | Region | Tm4sf10       | 192216 | X    | 75731366  | 75757118  | +    |
| 8406 | 1423145_a_at | Region | Tcap          | 21393  | 11   | 98204898  | 98206299  | +    |
| 8407 | 1456715_at   | Region | Phr1          | 105689 | 14   | 97658865  | 97891435  | -    |
| 8408 | 1444087_at   | Region | Prpf38a       | 230596 | 4    | 107523775 | 107538232 | -    |
| 8409 | 1452845_at   | Region | Hif1an        | 319594 | 19   | 44107275  | 44174420  | +    |
| 8410 | 1446955_at   | Region | Nr2c2         | 22026  | NONE | NONE      | NONE      | NONE |
| 8411 | 1437272_at   | Region | 4932443J21Rik | 320752 | 9    | 24452062  | 24453053  | -    |
| 8412 | 1427054_s_at | Region | None          | None   | 16   | 55472636  | 55593745  | +    |
| 8413 | 1437181_at   | Region | Peli2         | 93834  | 14   | 43206712  | 43342591  | +    |
| 8414 | 1423494_at   | Region | 2310042E22Rik | 66561  | 16   | 19923731  | 19925006  | -    |
| 8415 | 1431822_a_at | Region | Azi2          | 27215  | 9    | 118036598 | 118059690 | +    |
| 8416 | 1434514_at   | Region | Rbm15         | 229700 | 3    | 107121774 | 107129502 | -    |
| 8417 | 1454819_at   | Region | None          | None   | 6    | 54789416  | 54790165  | +    |
| 8418 | 1431187_s_at | Region | Dlg5          | 71228  | 14   | 22497841  | 22611777  | -    |
| 8419 | 1436276_at   | Region | AU041707      | 102247 | 8    | 21927525  | 21962925  | -    |
| 8420 | 1418308_at   | Region | Hus1          | 15574  | 11   | 8887934   | 8905929   | -    |
| 8421 | 1429820_at   | Region | Rutbc2        | 52850  | 5    | 112319917 | 112387408 | -    |
| 8422 | 1450162_at   | Region | Dpf3          | 70127  | 12   | 80134474  | 80234627  | -    |
| 8423 | 1436090_at   | Region | Enpp6         | 320981 | 8    | 45933793  | 46041689  | +    |
| 8424 | 1452950_at   | Region | Mett5d1       | 76894  | 2    | 108716087 | 108902077 | -    |
| 8425 | 1427832_at   | Region | Tuba-rs1      | 26947  | 17   | 27988280  | 27988880  | +    |
| 8426 | 1434430_s_at | Region | Adora2b       | 11541  | 11   | 61974626  | 61992094  | +    |
| 8427 | 1442426_at   | Region | BC037674      | 218914 | 14   | 32808636  | 32880366  | +    |
| 8428 | 1418503_at   | Region | Hspa9a        | 15526  | 18   | 35161089  | 35177981  | -    |
| 8429 | 1429742_at   | Region | Chc1l         | 105670 | 14   | 67493623  | 67535123  | +    |
| 8430 | 1460126_at   | Region | None          | None   | 11   | 23241221  | 23241873  | +    |
| 8431 | 1458536_at   | Region | Ccni          | 12453  | 5    | 92517687  | 92541778  | -    |
| 8432 | 1420971_at   | Region | Ubr1          | 22222  | 2    | 120375495 | 120484564 | -    |
| 8433 | 1430587_at   | Region | 4933425L03Rik | 71169  | 12   | 12682551  | 12943170  | +    |
| 8434 | 1451767_at   | Region | Ncf1          | 17969  | 5    | 133511650 | 133520970 | -    |
| 8435 | 1457839_at   | Region | Dhx40         | 67487  | 11   | 86497746  | 86535629  | -    |
| 8436 | 1422818_at   | Region | Nedd9         | 18003  | 13   | 40868522  | 41047402  | -    |
| 8437 | 1446481_at   | Region | Apbb2         | 11787  | 5    | 65067237  | 65384014  | -    |
| 8438 | 1449871_at   | Region | Tbx18         | 76365  | 9    | 88049059  | 88076120  | -    |
| 8439 | 1426520_at   | Region | Btg4          | 56057  | 9    | 51188327  | 51192026  | +    |
| 8440 | 1440003_at   | Region | None          | None   | 6    | 114294027 | 114294741 | +    |
| 8441 | 1457222_at   | Region | Creb5         | 231991 | 6    | 53717699  | 53840157  | +    |
| 8442 | 1453199_at   | Region | Acbd6         | 72482  | 1    | 155453464 | 155582573 | +    |
| 8443 | 1441387_at   | Region | BC030343      | 269723 | 5    | 142330755 | 142331083 | +    |
| 8444 | 1438542_at   | Region | None          | None   | 11   | 69308887  | 69309357  | +    |
| 8445 | 1417319_at   | Region | Pvrl3         | 58998  | 16   | 45281022  | 45382981  | -    |
| 8446 | 1440741_at   | Region | Htr1d         | 15552  | 4    | 135304781 | 135325655 | +    |
| 8447 | 1444246_at   | Region | Chd2          | 244059 | 7    | 67322642  | 67415792  | -    |
| 8448 | 1447315_at   | Region | None          | None   | NONE | NONE      | NONE      | NONE |
| 8449 | 1427290_at   | Region | Krt2-19       | 64818  | 15   | 101516799 | 101549911 | -    |
| 8450 | 1437822_at   | Region | Yme111        | 27377  | 2    | 23088708  | 23130798  | +    |

|      |              |        |               |        |      |           |           |      |
|------|--------------|--------|---------------|--------|------|-----------|-----------|------|
| 8451 | 1439188_at   | Region | Cpsf6         | 432508 | 10   | 117042913 | 117044350 | -    |
| 8452 | 1442271_at   | Region | 4930432B04Rik | 75786  | 2    | 91305906  | 91306575  | +    |
| 8453 | 1424282_at   | Region | Pet112l       | 229487 | 3    | 85317234  | 85397575  | +    |
| 8454 | 1434545_x_at | Region | 1110025L05Rik | 66162  | 7    | 120745731 | 120746424 | +    |
| 8455 | 1426590_at   | Region | Gfm2          | 320806 | 13   | 93327341  | 93365553  | +    |
| 8456 | 1421907_at   | Region | Pparbp        | 19014  | 11   | 97973241  | 98014347  | -    |
| 8457 | 1423005_a_at | Region | Espn          | 56226  | 4    | 150613239 | 150644569 | -    |
| 8458 | 1418041_at   | Region | 4432406C05Rik | 66690  | 16   | 8307024   | 8310994   | -    |
| 8459 | 1429911_at   | Region | Mcph1         | 244329 | 8    | 18540173  | 18748189  | +    |
| 8460 | 1432908_at   | Region | 2810410P21Rik | 72731  | NONE | NONE      | NONE      | NONE |
| 8461 | 1419940_at   | Region | C030018P15Rik | 109260 | 12   | 67720697  | 67721300  | +    |
| 8462 | 1447255_at   | Region | 2310015A10Rik | 69548  | NONE | NONE      | NONE      | NONE |
| 8463 | 1430198_at   | Region | 3110009F21Rik | 67280  | 12   | 105627247 | 105633498 | -    |
| 8464 | 1458926_at   | Region | 5830415L20Rik | 68152  | 5    | 3549849   | 3575816   | +    |
| 8465 | 1442254_at   | Region | Dgkd          | 227333 | 1    | 87696734  | 87764305  | +    |
| 8466 | 1456450_at   | Region | Ctns          | 83429  | 11   | 72908791  | 72924677  | -    |
| 8467 | 1435884_at   | Region | ltsn1         | 16443  | 16   | 90939437  | 91069253  | +    |
| 8468 | 1438744_at   | Region | Asb7          | 117589 | 7    | 60532010  | 60573698  | -    |
| 8469 | 1428166_at   | Region | Cdan1         | 68968  | 2    | 120230371 | 120245350 | -    |
| 8470 | 1456650_at   | Region | None          | None   | 1    | 137776613 | 137777283 | +    |
| 8471 | 1445004_a_at | Region | A330068P14Rik | 327958 | 11   | 71776765  | 71784195  | -    |
| 8472 | 1416585_at   | Region | Ruvbl1        | 56505  | 6    | 88900844  | 88932944  | +    |
| 8473 | 1440851_at   | Region | None          | None   | 11   | 30824574  | 30825170  | -    |
| 8474 | 1459997_s_at | Region | Tmem17        | 103765 | 11   | 22407076  | 22414024  | +    |
| 8475 | 1447028_at   | Region | 4930563E22Rik | 75304  | 11   | 71940830  | 71944102  | +    |
| 8476 | 1425658_at   | Region | Cd109         | 235505 | 9    | 78815469  | 78916251  | +    |
| 8477 | 1456094_at   | Region | Usp36         | 72344  | 11   | 118078029 | 118111324 | -    |
| 8478 | 1431566_at   | Region | None          | None   | 2    | 147401406 | 147433122 | -    |
| 8479 | 1444514_at   | Region | Stx5a         | 56389  | 19   | 7938367   | 7952189   | +    |
| 8480 | 1416448_at   | Region | ltpa          | 16434  | 2    | 130181694 | 130195467 | +    |
| 8481 | 1427534_at   | Region | 4930535I16Rik | 75220  | 4    | 122931341 | 122944382 | -    |
| 8482 | 1439838_a_at | Region | Tmie          | 20776  | 9    | 110907343 | 110921380 | -    |
| 8483 | 1417588_at   | Region | Galnt3        | 14425  | 2    | 65938833  | 65982415  | -    |
| 8484 | 1438413_at   | Region | Senp7         | 66315  | 16   | 54970744  | 55086065  | +    |
| 8485 | 1434085_at   | Region | Zfp523        | 224656 | 17   | 25973336  | 26001802  | +    |
| 8486 | 1428366_at   | Region | 1600027N09Rik | 73247  | 2    | 180298180 | 180303262 | +    |
| 8487 | 1430311_at   | Region | Marcks        | 17118  | 10   | 37207003  | 37211096  | -    |
| 8488 | 1453712_a_at | Region | Map2k5        | 23938  | 9    | 63284916  | 63498276  | -    |
| 8489 | 1436267_a_at | Region | Frap1         | 56717  | 4    | 146940969 | 147050045 | +    |
| 8490 | 1441906_x_at | Region | Syap1         | 67043  | X    | 156456257 | 156487836 | -    |
| 8491 | 1439942_at   | Region | Prep          | 19072  | 10   | 45184189  | 45275958  | +    |
| 8492 | 1416047_at   | Region | Fuca2         | 66848  | 10   | 13382818  | 13399065  | +    |
| 8493 | 1447921_at   | Region | None          | None   | 5    | 142346289 | 142346458 | -    |
| 8494 | 1448225_at   | Region | Gpaa1         | 14731  | 15   | 76379484  | 76383089  | +    |
| 8495 | 1420114_s_at | Region | 2410022L05Rik | 66423  | 8    | 13263410  | 13268885  | -    |
| 8496 | 1452032_at   | Region | Prkar1a       | 19084  | 11   | 109472038 | 109490737 | +    |
| 8497 | 1459946_at   | Region | None          | None   | 1    | 43046937  | 43047603  | +    |
| 8498 | 1435361_at   | Region | AK129018      | 218877 | 14   | 29349698  | 29362188  | +    |
| 8499 | 1456347_at   | Region | 2010309L07Rik | 66485  | 17   | 15395468  | 15395912  | -    |
| 8500 | 1439328_at   | Region | Nfat5         | 54446  | 8    | 106591549 | 106677210 | +    |
| 8501 | 1455417_at   | Region | Kcnj11        | 16514  | 7    | 40182510  | 40185585  | -    |
| 8502 | 1426806_at   | Region | 5830411E10Rik | 109019 | 1    | 51769634  | 51779343  | -    |
| 8503 | 1422320_x_at | Region | Phxr5         | 18690  | 7    | 103697887 | 103699905 | -    |
| 8504 | 1455841_s_at | Region | Grwd1         | 101612 | 7    | 39909985  | 39915506  | -    |
| 8505 | 1459866_x_at | Region | Nipa2         | 93790  | 7    | 50201064  | 50231927  | -    |
| 8506 | 1438160_x_at | Region | Slco4a1       | 108115 | 2    | 180177936 | 180191810 | +    |
| 8507 | 1443812_x_at | Region | Cstf2t        | 83410  | 19   | 30334913  | 30338502  | +    |
| 8508 | 1450625_at   | Region | Col5a2        | 12832  | 1    | 45679868  | 45806698  | -    |
| 8509 | 1456727_a_at | Region | Csnk1d        | 104318 | 11   | 120784515 | 120812412 | -    |
| 8510 | 1443918_at   | Region | 2700050L05Rik | 214764 | 7    | 128005358 | 128040623 | +    |
| 8511 | 1425914_a_at | Region | Armcx1        | 78248  | X    | 128262928 | 128266856 | +    |
| 8512 | 1453037_at   | Region | None          | None   | 17   | 45204318  | 45205222  | +    |
| 8513 | 1424695_at   | Region | 2010011I20Rik | 67017  | 2    | 171854342 | 171864482 | +    |
| 8514 | 1425637_at   | Region | 6430548M08Rik | 234797 | 8    | 119500738 | 119518927 | +    |
| 8515 | 1426962_at   | Region | 6820402O20Rik | 228829 | 2    | 155653612 | 155764373 | +    |

|      |              |        |                   |        |    |           |           |   |
|------|--------------|--------|-------------------|--------|----|-----------|-----------|---|
| 8516 | 1448800_at   | Region | Rtn4ip1           | 170728 | 10 | 44011554  | 44057609  | + |
| 8517 | 1426012_a_at | Region | 2610301G19Rik     | 219158 | 14 | 64454157  | 64470333  | - |
| 8518 | 1458915_at   | Region | C77949            | 97227  | 5  | 141422126 | 141422690 | + |
| 8519 | 1424203_at   | Region | Ncln              | 103425 | 10 | 81621714  | 81631821  | - |
| 8520 | 1421757_at   | Region | Htr6              | 15565  | 4  | 137942670 | 137956050 | - |
|      |              |        | Sim2 ///          |        |    |           |           |   |
|      |              |        | LOC547289 ///     |        |    |           |           |   |
| 8521 | 1419437_at   | Region | LOC547335         | 20465  | 16 | 93258955  | 93522296  | + |
| 8522 | 1453713_s_at | Region | 4930546H06Rik     | 75202  | 17 | 15694963  | 15706791  | + |
| 8523 | 1424858_at   | Region | L2hgdh            | 217666 | 12 | 66521922  | 66556288  | - |
| 8524 | 1459848_x_at | Region | None              | None   | 2  | 27115114  | 27115362  | + |
| 8525 | 1421515_at   | Region | Nr6a1             | 14536  | 2  | 38655532  | 38859850  | - |
| 8526 | 1424636_at   | Region | 2610204L23Rik     | 67163  | 11 | 106021555 | 106037392 | - |
| 8527 | 1459373_at   | Region | Epb4.1            | 269587 | 4  | 130721061 | 130868982 | - |
| 8528 | 1422696_at   | Region | Ttyh1             | 57776  | 7  | 3340443   | 3356202   | + |
| 8529 | 1460327_at   | Region | Gpr88             | 64378  | 3  | 115019299 | 115023427 | - |
| 8530 | 1454558_at   | Region | 5430416B10Rik     | 71430  | 2  | 113195292 | 113196381 | + |
| 8531 | 1419743_s_at | Region | Carm1             | 59035  | 9  | 21456863  | 21476863  | + |
| 8532 | 1436900_x_at | Region | Leprot            | 230514 | 4  | 100606688 | 100618263 | + |
| 8533 | 1438287_x_at | Region | Ddx39             | 68278  | 8  | 82975115  | 82983264  | + |
| 8534 | 1417475_at   | Region | Atp13a1           | 170759 | 8  | 68941427  | 68958004  | + |
|      |              |        | 2310009B15Rik /// |        |    |           |           |   |
| 8535 | 1455761_at   | Region | LOC545365         | 545365 | 1  | 138696345 | 138701165 | - |
| 8536 | 1437864_at   | Region | Adipor2           | 68465  | 6  | 119785416 | 119849749 | - |
| 8537 | 1444917_at   | Region | 6130401J04Rik     | 66799  | 1  | 16725948  | 16804454  | - |
| 8538 | 1448901_at   | Region | Cpxm1             | 56264  | 2  | 129904628 | 129911427 | - |
| 8539 | 1428665_at   | Region | None              | None   | 12 | 3935489   | 3945007   | + |
| 8540 | 1459475_at   | Region | D10Ertd761e       | 52706  | 10 | 82101232  | 82101667  | - |
| 8541 | 1456975_at   | Region | Taok1             | 216965 | 11 | 77255718  | 77311108  | - |
| 8542 | 1453593_at   | Region | 1700110N18Rik     | 73569  | 16 | 64821348  | 64869062  | + |
| 8543 | 1444739_at   | Region | None              | None   | 6  | 82966764  | 82967375  | - |
| 8544 | 1417970_at   | Region | Atp5s             | 68055  | 12 | 66556432  | 66576128  | + |
|      |              |        | Pcaf ///          |        |    |           |           |   |
| 8545 | 1457809_at   | Region | LOC330129         | 18519  | 17 | 51101486  | 51203822  | + |
| 8546 | 1444886_at   | Region | Appbp2            | 66884  | 11 | 84919300  | 84963112  | - |
| 8547 | 1434711_at   | Region | BC030867          | 217216 | 11 | 102069972 | 102086265 | + |
| 8548 | 1458765_at   | Region | Rbm10             | 236732 | X  | 18858936  | 18889829  | + |
| 8549 | 1450462_at   | Region | Crhr2             | 12922  | 6  | 55234412  | 55277297  | - |
| 8550 | 1442634_at   | Region | None              | None   | 3  | 68162303  | 68162933  | - |
| 8551 | 1458328_x_at | Region | 3110007P09Rik     | 73094  | 4  | 101719268 | 101930082 | + |
| 8552 | 1457249_at   | Region | Ubap2l            | 74383  | 3  | 89810481  | 89862883  | - |
| 8553 | 1437269_at   | Region | AW124722          | 239570 | 15 | 85880947  | 85905439  | + |
| 8554 | 1440749_at   | Region | 1300002E11Rik     | 71751  | 16 | 20663480  | 20702856  | + |
| 8555 | 1417681_at   | Region | Cpsf5             | 68219  | 8  | 93303578  | 93321193  | - |
| 8556 | 1447499_s_at | Region | Omt2b             | 382088 | 9  | 78512287  | 78513851  | - |
| 8557 | 1417118_a_at | Region | Ard1              | 56292  | X  | 68577530  | 68582568  | - |
| 8558 | 1444611_at   | Region | None              | None   | X  | 157575331 | 157575652 | + |
| 8559 | 1443838_x_at | Region | Fads2             | 56473  | 19 | 9260661   | 9298000   | - |
| 8560 | 1442222_at   | Region | lfnar1            | 15975  | 16 | 90642257  | 90664445  | + |
| 8561 | 1446447_at   | Region | 4921537D05Rik     | 77048  | 10 | 94662974  | 94764320  | + |
| 8562 | 1452294_at   | Region | Pcdh1             | 75599  | 18 | 38420416  | 38433484  | - |
| 8563 | 1435339_at   | Region | Kctd15            | 233107 | 7  | 29792806  | 29806632  | - |
| 8564 | 1435127_a_at | Region | Osgepl1           | 72085  | 1  | 53621177  | 53631578  | + |
| 8565 | 1458850_at   | Region | Myh7              | 140781 | 14 | 49487183  | 49511559  | - |
| 8566 | 1447511_at   | Region | Cacna1b           | 12287  | 2  | 24538537  | 24695314  | - |
| 8567 | 1457952_at   | Region | Cd80              | 12519  | 16 | 37277581  | 37317238  | + |
| 8568 | 1454873_at   | Region | C130032F08Rik     | 243372 | 6  | 48746059  | 48756106  | + |
| 8569 | 1450432_s_at | Region | Mus81             | 71711  | 19 | 5271641   | 5277131   | - |
| 8570 | 1429038_at   | Region | 1500034J01Rik     | 66498  | 8  | 70619056  | 70625966  | + |
| 8571 | 1436052_at   | Region | 1700020O03Rik     | 70373  | 12 | 83112070  | 83161560  | + |
| 8572 | 1456625_at   | Region | None              | None   | 9  | 4202406   | 4203204   | - |
| 8573 | 1459248_at   | Region | Ptpn9             | 56294  | 9  | 57108988  | 57176293  | + |
| 8574 | 1455118_at   | Region | D9Ertd402e        | 382117 | 9  | 122853031 | 122854106 | + |
| 8575 | 1420570_x_at | Region | Tcl1b3            | 27378  | 12 | 100635179 | 100639748 | + |
| 8576 | 1446137_at   | Region | Gbas              | 14467  | 5  | 128900966 | 128934118 | + |



|      |              |        |               |        |      |           |           |      |
|------|--------------|--------|---------------|--------|------|-----------|-----------|------|
| 8577 | 1458820_at   | Region | None          | None   | 9    | 20218990  | 20219727  | -    |
| 8578 | 1421944_a_at | Region | Asgr1         | 11889  | 11   | 69780073  | 69783544  | +    |
| 8579 | 1445624_at   | Region | D8ErtD587e    | 52335  | 8    | 109034895 | 109035353 | +    |
| 8580 | 1422782_s_at | Region | Tlr3          | 142980 | 8    | 44343914  | 44358907  | -    |
| 8581 | 1423344_at   | Region | Epor          | 13857  | 9    | 21848885  | 21854434  | -    |
| 8582 | 1441240_at   | Region | Rpa1          | 68275  | 11   | 75026006  | 75073962  | -    |
| 8583 | 1435508_x_at | Region | 0610009D07Rik | 66055  | 12   | 3985835   | 3999611   | +    |
| 8584 | 1424139_at   | Region | Rap1a         | 109905 | 3    | 105524111 | 105597165 | -    |
| 8585 | 1437788_at   | Region | Sp6           | 83395  | 11   | 96834656  | 96845821  | +    |
| 8586 | 1456132_x_at | Region | Tgfb1i4       | 21807  | 14   | 70758316  | 70850256  | +    |
| 8587 | 1460176_at   | Region | Crk           | 12928  | 11   | 75404968  | 75431752  | +    |
| 8588 | 1444769_at   | Region | Tex9          | 21778  | 9    | 72593752  | 72624808  | -    |
| 8589 | 1428833_at   | Region | 4930406D14Rik | 73805  | 11   | 86678121  | 86679892  | -    |
| 8590 | 1446653_at   | Region | None          | None   | NONE | NONE      | NONE      | NONE |
| 8591 | 1455639_at   | Region | Rap2ip        | 51799  | 11   | 102214763 | 102223640 | +    |
| 8592 | 1423699_at   | Region | D15ErtD785e   | 52683  | 15   | 89408645  | 89425699  | +    |
| 8593 | 1432383_a_at | Region | 4930438O05Rik | 78795  | 1    | 85961103  | 86084595  | +    |
| 8594 | 1418417_at   | Region | Msc           | 17681  | 1    | 14930745  | 14933365  | -    |
| 8595 | 1450568_at   | Region | Galr1         | 14427  | 18   | 82561154  | 82574552  | -    |
| 8596 | 1427334_s_at | Region | 2810474O19Rik | 67246  | 6    | 24756910  | 24759603  | +    |
| 8597 | 1430657_at   | Region | 1810034E14Rik | 66503  | 13   | 61632956  | 61652402  | +    |
| 8598 | 1429522_at   | Region | Ankrd42       | 73845  | 7    | 86648875  | 86677040  | -    |
| 8599 | 1435188_at   | Region | LOC433627     | 433627 | 3    | 95365378  | 95371717  | -    |
| 8600 | 1426454_at   | Region | Arhgdib       | 11857  | 6    | 137695505 | 137713513 | -    |
| 8601 | 1442278_at   | Region | Jarid1b       | 75605  | 1    | 134410458 | 134483140 | +    |
| 8602 | 1425188_s_at | Region | Sel1h         | 20338  | 12   | 87225863  | 87265702  | -    |
| 8603 | 1434048_at   | Region | 4930471M23Rik | 74919  | 5    | 29106904  | 29118671  | +    |
| 8604 | 1445606_a_at | Region | 2900009J06Rik | 72887  | 1    | 127596004 | 127616472 | -    |
| 8605 | 1454107_a_at | Region | Kif2a         | 16563  | 13   | 103169548 | 103230223 | -    |
| 8606 | 1455942_at   | Region | Fbxl11        | 225876 | 19   | 4106596   | 4187056   | -    |
| 8607 | 1439176_at   | Region | None          | None   | NONE | NONE      | NONE      | NONE |
| 8608 | 1419997_at   | Region | None          | None   | 3    | 31985298  | 31985849  | -    |
| 8609 | 1451315_at   | Region | 2610511E22Rik | 76547  | 11   | 101973636 | 101977448 | -    |
| 8610 | 1419208_at   | Region | Map3k8        | 26410  | 18   | 4336071   | 4357697   | -    |
| 8611 | 1460002_at   | Region | Tlk1          | 228012 | 2    | 70410150  | 70523223  | -    |
| 8612 | 1432183_at   | Region | C030022K24Rik | 77462  | 5    | 120615004 | 120647228 | +    |
| 8613 | 1437781_at   | Region | None          | None   | 12   | 52321795  | 52322476  | +    |
| 8614 | 1435823_x_at | Region | Egfl7         | 353156 | 2    | 26513245  | 26524844  | +    |
| 8615 | 1422095_a_at | Region | Tyki          | 22169  | 12   | 23014305  | 23024800  | +    |
| 8616 | 1427525_at   | Region | Cd151         | 12476  | 7    | 135869384 | 135873464 | +    |
| 8617 | 1459887_at   | Region | Ube4a         | 140630 | 9    | 44921926  | 44954380  | -    |
| 8618 | 1418449_at   | Region | Lad1          | 16763  | 1    | 135665574 | 135680235 | +    |
| 8619 | 1458628_at   | Region | Limk2         | 16886  | 11   | 3239044   | 3303961   | -    |
| 8620 | 1430539_at   | Region | 1810057P16Rik | 67622  | 11   | 116624497 | 116649139 | -    |
| 8621 | 1431234_at   | Region | 1700041B20Rik | 73338  | 2    | 126654382 | 126656482 | -    |
| 8622 | 1435408_at   | Region | 2700092H06Rik | 78325  | 5    | 149577052 | 149577849 | -    |
| 8623 | 1428586_at   | Region | Tmem41b       | 233724 | 7    | 103825350 | 103839101 | -    |
| 8624 | 1431651_at   | Region | C330001K17Rik | 77609  | 9    | 21879781  | 21892408  | -    |
| 8625 | 1444941_at   | Region | None          | None   | 5    | 59644779  | 59645539  | -    |
| 8626 | 1421377_at   | Region | Traf6         | 22034  | 2    | 101383123 | 101405659 | +    |
| 8627 | 1443358_at   | Region | None          | None   | 14   | 5732841   | 5733441   | +    |
| 8628 | 1437695_at   | Region | Gpr731        | 246313 | 2    | 131885018 | 131899253 | -    |
| 8629 | 1433221_at   | Region | 2610311E24Rik | 70469  | NONE | NONE      | NONE      | NONE |
| 8630 | 1443551_at   | Region | Atp2a2        | 11938  | 5    | 121605864 | 121654245 | -    |
| 8631 | 1454311_at   | Region | None          | None   | 2    | 130525264 | 130526320 | +    |
| 8632 | 1436929_x_at | Region | Adcy3         | 104111 | 12   | 3286276   | 3366296   | +    |
| 8633 | 1426513_at   | Region | Rbm28         | 68272  | 6    | 29172114  | 29205297  | -    |
| 8634 | 1443966_at   | Region | None          | None   | 19   | 28858795  | 28859429  | +    |
| 8635 | 1459098_at   | Region | Dst           | 13518  | 1    | 34280938  | 34577763  | +    |
| 8636 | 1417521_at   | Region | Efna2         | 13637  | 10   | 80304628  | 80314613  | +    |
| 8637 | 1437337_x_at | Region | Fuk           | 234730 | 8    | 110180185 | 110200181 | -    |
| 8638 | 1440235_at   | Region | Itga10 ///    |        |      |           |           |      |
| 8638 | 1440235_at   | Region | LOC547448     | 213119 | 3    | 96133436  | 96152349  | +    |
| 8639 | 1456273_x_at | Region | Tpmt          | 22017  | 13   | 46623326  | 46641352  | -    |
| 8640 | 1443628_at   | Region | Wwp1          | 107568 | 4    | 19537563  | 19635959  | -    |

|      |              |        |               |        |      |           |           |      |
|------|--------------|--------|---------------|--------|------|-----------|-----------|------|
| 8641 | 1455384_x_at | Region | D030056L22    | 225995 | 19   | 17960188  | 17965380  | +    |
| 8642 | 1440497_at   | Region | 1300018I05Rik | 74157  | 17   | 27470422  | 27513276  | +    |
| 8643 | 1448502_at   | Region | Slc16a7       | 20503  | 10   | 124921069 | 125022119 | -    |
| 8644 | 1459728_at   | Region | 5830446M03Rik | 57905  | 6    | 88255108  | 88275421  | -    |
| 8645 | 1458910_at   | Region | Tbrg3         | 21378  | 15   | 82917881  | 82918219  | -    |
| 8646 | 1441835_x_at | Region | Mtmr11        | 194126 | 3    | 95649869  | 95659546  | +    |
| 8647 | 1460447_at   | Region | 3000003F02Rik | 78895  | 15   | 94591343  | 94612193  | -    |
| 8648 | 1430237_at   | Region | Cldn22        | 75677  | 8    | 46794079  | 46795074  | +    |
| 8649 | 1433127_at   | Region | 4930513L20Rik | 71656  | 7    | 101153912 | 101154816 | +    |
| 8650 | 1447011_at   | Region | 1200009B18Rik | 67456  | 6    | 149113867 | 149145859 | -    |
| 8651 | 1436448_a_at | Region | Ptgs1         | 19224  | 2    | 36162689  | 36184424  | +    |
| 8652 | 1446811_at   | Region | 9430023B20Rik | 210719 | 18   | 69777707  | 7047463   | -    |
| 8653 | 1454195_at   | Region | 4933433G19Rik | 71226  | 13   | 63599240  | 63634827  | -    |
| 8654 | 1427698_at   | Region | Brca1         | 12189  | 11   | 101309851 | 101370207 | -    |
| 8655 | 1440714_at   | Region | ---           | 433569 | 3    | 33875269  | 33882992  | -    |
| 8656 | 1442780_at   | Region | 2610002J02Rik | 67513  | 4    | 153742328 | 153749046 | +    |
| 8657 | 1444129_at   | Region | None          | None   | 13   | 112753926 | 112754767 | -    |
| 8658 | 1427385_s_at | Region | Actn1         | 109711 | 12   | 77029036  | 77121075  | -    |
| 8659 | 1444114_at   | Region | Mkln1         | 27418  | 6    | 31475825  | 31586464  | +    |
| 8660 | 1452495_at   | Region | Adam28        | 13522  | 14   | 63136656  | 63185619  | -    |
| 8661 | 1422544_at   | Region | Myo10         | 17909  | 15   | 25611655  | 25800954  | +    |
| 8662 | 1439706_at   | Region | A330106F07Rik | 402724 | 2    | 23425090  | 23425518  | -    |
| 8663 | 1457801_at   | Region | 9930024M15Rik | 399602 | 10   | 41934632  | 41935129  | +    |
| 8664 | 1451857_a_at | Region | 5730593N15Rik | 77583  | 11   | 120480250 | 120482908 | +    |
| 8665 | 1421254_a_at | Region | Sgcg          | 24053  | 14   | 55756587  | 55793567  | -    |
| 8666 | 1455127_at   | Region | 5430438H03Rik | 319581 | 8    | 18877730  | 18895959  | -    |
| 8667 | 1429135_at   | Region | 1110059M19Rik | 68800  | X    | 39611700  | 39613587  | +    |
| 8668 | 1436635_at   | Region | D11Moh35      | 268470 | 11   | 95868517  | 95886448  | -    |
| 8669 | 1450564_x_at | Region | Ifna1         | 15962  | 4    | 87836279  | 87836848  | +    |
| 8670 | 1456168_at   | Region | Gm877         | 380694 | 11   | 43281564  | 43346257  | +    |
| 8671 | 1437673_at   | Region | None          | None   | 14   | 26663643  | 26664551  | +    |
| 8672 | 1425270_at   | Region | Kif1b         | 16561  | 4    | 147668683 | 147799980 | -    |
| 8673 | 1439947_at   | Region | Cyp11a1       | 13070  | 9    | 58129644  | 58141559  | +    |
| 8674 | 1433560_at   | Region | 9330175B01Rik | 106068 | 15   | 73605805  | 73674109  | -    |
| 8675 | 1443112_at   | Region | Api5          | 11800  | 2    | 94116415  | 94142756  | -    |
| 8676 | 1445506_at   | Region | None          | None   | 11   | 77244275  | 77264082  | +    |
| 8677 | 1430588_at   | Region | Mro           | 71263  | 18   | 74093614  | 74112959  | +    |
| 8678 | 1431174_at   | Region | A930036K24Rik | 77829  | 9    | 107745633 | 107747060 | +    |
| 8679 | 1447422_at   | Region | Garnl1        | 56784  | 12   | 52323288  | 52540884  | -    |
| 8680 | 1423504_at   | Region | Jam3          | 83964  | 9    | 26991141  | 27048370  | -    |
| 8681 | 1436191_at   | Region | Arid4a        | 238247 | 12   | 67850998  | 67933600  | +    |
| 8682 | 1419820_at   | Region | Pkhd1         | 241035 | 1    | 20275361  | 20840829  | -    |
| 8683 | 1457221_at   | Region | None          | None   | NONE | NONE      | NONE      | NONE |
| 8684 | 1459393_at   | Region | Tcfap2b       | 21419  | 1    | 19426696  | 19452210  | +    |
| 8685 | 1453611_at   | Region | Rbbp6         | 19647  | 7    | 116848797 | 116880431 | +    |
| 8686 | 1459588_at   | Region | Kit           | 16590  | 5    | 74409260  | 74490904  | +    |
| 8687 | 1421228_at   | Region | Ccl7          | 20306  | 11   | 81785373  | 81787184  | +    |
| 8688 | 1433739_at   | Region | Gm67          | 217431 | 12   | 16711160  | 16792762  | +    |
| 8689 | 1443361_at   | Region | 9430079M16Rik | 109246 | 6    | 128652920 | 128772541 | -    |
| 8690 | 1425075_at   | Region | Gatad2b       | 229542 | 3    | 90152072  | 90168538  | +    |
| 8691 | 1452058_a_at | Region | Rnf11         | 29864  | 4    | 108411762 | 108435410 | -    |
| 8692 | 1419918_at   | Region | Tmed7         | 66676  | 18   | 46809246  | 46819270  | -    |
| 8693 | 1428199_at   | Region | 4930578F03Rik | 75894  | 2    | 120654277 | 120670529 | +    |
| 8694 | 1450351_a_at | Region | Rsn           | 56430  | 5    | 122749321 | 122826732 | -    |
| 8695 | 1444934_at   | Region | Zfp276        | 57247  | 8    | 122630839 | 122644636 | +    |
| 8696 | 1428208_at   | Region | Bcl7a         | 77045  | 5    | 122516563 | 122546119 | +    |
| 8697 | 1440558_at   | Region | Atp9b         | 50771  | 18   | 80858429  | 81057410  | -    |
| 8698 | 1439509_at   | Region | 2900008C10Rik | 72937  | X    | 10373621  | 10399286  | -    |
| 8699 | 1458180_at   | Region | None          | None   | NONE | NONE      | NONE      | NONE |
| 8700 | 1438102_at   | Region | Senp8         | 71599  | 9    | 59852773  | 59867496  | -    |
| 8701 | 1440433_at   | Region | Nmt2          | 18108  | 2    | 3201559   | 3243640   | +    |
| 8702 | 1422087_at   | Region | Lmyc1         | 16918  | 4    | 122023211 | 122029597 | +    |
| 8703 | 1421531_at   | Region | Akap3         | 11642  | 6    | 127527211 | 127548304 | +    |
| 8704 | 1419915_at   | Region | D10Ert438e    | 52014  | 10   | 52670740  | 52691207  | +    |
| 8705 | 1459417_at   | Region | None          | None   | 9    | 65837174  | 65837651  | -    |

|      |              |        |               |        |      |           |           |      |
|------|--------------|--------|---------------|--------|------|-----------|-----------|------|
| 8706 | 1458740_at   | Region | None          | None   | 1    | 115798565 | 115799483 | +    |
| 8707 | 1447607_at   | Region | None          | None   | NONE | NONE      | NONE      | NONE |
| 8708 | 1454087_at   | Region | 2810031P15Rik | 72701  | 4    | 62056769  | 62225062  | +    |
| 8709 | 1441761_at   | Region | Tgn           | 21819  | 15   | 66694846  | 66874812  | +    |
| 8710 | 1456667_at   | Region | Hdh           | 15194  | 5    | 33249415  | 33397070  | +    |
| 8711 | 1459810_at   | Region | 1110008F13Rik | 67388  | 2    | 156320097 | 156330528 | +    |
| 8712 | 1442181_at   | Region | None          | None   | 7    | 13472708  | 13473664  | -    |
| 8713 | 1460069_at   | Region | Smc611        | 67241  | 12   | 10625170  | 10671328  | +    |
| 8714 | 1449876_at   | Region | Prkg1         | 19091  | 19   | 29820457  | 30038883  | -    |
| 8715 | 1427644_at   | Region | D0Kist4       | 27491  | NONE | NONE      | NONE      | NONE |
| 8716 | 1443911_at   | Region | Xpo1          | 103573 | 11   | 23150860  | 23192321  | +    |
| 8717 | 1424031_at   | Region | Snx11         | 74479  | 11   | 96588642  | 96598618  | -    |
| 8718 | 1442574_at   | Region | None          | None   | 16   | 90872236  | 90872802  | +    |
| 8719 | 1437366_at   | Region | Al608492      | 103269 | 10   | 126787728 | 126788276 | -    |
| 8720 | 1433107_at   | Region | Zc3h11a       | 70579  | 1    | 133482838 | 133516350 | -    |
| 8721 | 1459340_at   | Region | None          | None   | NONE | NONE      | NONE      | NONE |
| 8722 | 1418249_at   | Region | Crcp          | 12909  | 5    | 129199131 | 129230612 | +    |
| 8723 | 1455742_x_at | Region | Morf411       | 21761  | 9    | 89979040  | 90001962  | -    |
| 8724 | 1428044_at   | Region | Ap3s2         | 11778  | 7    | 73672386  | 73717617  | -    |
| 8725 | 1458458_at   | Region | Sfn5          | 327978 | 11   | 82691761  | 82702600  | +    |
| 8726 | 1419680_a_at | Region | Elac2         | 68626  | 11   | 64704747  | 64727719  | +    |
| 8727 | 1446131_at   | Region | None          | None   | 9    | 26996076  | 26996777  | +    |
| 8728 | 1416078_s_at | Region | Raf1          | 110157 | 6    | 116056173 | 116114081 | -    |
| 8729 | 1429703_at   | Region | 2900072G11Rik | 73005  | 2    | 14629340  | 14630990  | +    |
| 8730 | 1430413_at   | Region | 6330540D07Rik | 76170  | X    | 143932168 | 143975533 | -    |
| 8731 | 1449198_a_at | Region | St3gal5       | 20454  | 6    | 72429820  | 72486545  | +    |
| 8732 | 1424830_at   | Region | Ccnk          | 12454  | 12   | 103650832 | 103674346 | +    |
| 8733 | 1447609_at   | Region | 5730410E15Rik | 319613 | 15   | 44706659  | 44733620  | -    |
| 8734 | 1446095_at   | Region | Igf2r         | 16004  | 17   | 11321447  | 11408701  | -    |
| 8735 | 1429702_at   | Region | 2900072G11Rik | 73005  | 2    | 14629340  | 14630990  | +    |
| 8736 | 1440876_at   | Region | Rp9h          | 55934  | 9    | 22338723  | 22358719  | -    |
| 8737 | 1416876_at   | Region | Parvg         | 64099  | 15   | 84373319  | 84391538  | +    |
| 8738 | 1442616_at   | Region | Grasp         | 56149  | 15   | 101282359 | 101290906 | +    |
| 8739 | 1425085_at   | Region | 6330416L07Rik | 319615 | 17   | 20260455  | 20282030  | -    |
| 8740 | 1439391_at   | Region | 2810002I04Rik | 72350  | 12   | 82156575  | 82167280  | +    |
| 8741 | 1422237_at   | Region | Mc3r          | 17201  | 2    | 171757225 | 171759847 | +    |
| 8742 | 1422534_at   | Region | Cyp51         | 13121  | 5    | 4088954   | 4110454   | -    |
| 8743 | 1458078_at   | Region | Chd9          | 109151 | 8    | 90276602  | 90277120  | +    |
| 8744 | 1454765_at   | Region | LOC227109     | 227109 | 1    | 54704189  | 54745716  | -    |
| 8745 | 1445229_at   | Region | Dgat1         | 13350  | 15   | 76552397  | 76562200  | -    |
| 8746 | 1453652_at   | Region | 4933400F21Rik | 74403  | 1    | 89495997  | 89502443  | -    |
| 8747 | 1419964_s_at | Region | Hdgf          | 15191  | 3    | 87650025  | 87659786  | +    |
| 8748 | 1436983_at   | Region | Crebbp        | 12914  | 16   | 3763367   | 3779836   | -    |
| 8749 | 1456591_x_at | Region | Akap3         | 11642  | 6    | 127527211 | 127548304 | +    |
| 8750 | 1438573_at   | Region | 4932432N11Rik | 74386  | 13   | 57034424  | 57043384  | +    |
| 8751 | 1447941_x_at | Region | Braf          | 109880 | 6    | 39749542  | 39860924  | -    |
| 8752 | 1441302_at   | Region | LOC433471     | 433471 | 2    | 124638104 | 124650569 | -    |
| 8753 | 1418839_at   | Region | Glmn          | 170823 | 5    | 106619473 | 106668024 | -    |
| 8754 | 1419827_s_at | Region | Kif17         | 16559  | 4    | 137143512 | 137182753 | +    |
| 8755 | 1450315_at   | Region | V1rd14        | 81011  | 7    | 17631886  | 17634324  | -    |
| 8756 | 1439382_x_at | Region | Ddr1          | 12305  | 17   | 33397888  | 33421229  | -    |
| 8757 | 1439421_x_at | Region | None          | None   | 3    | 32306908  | 32307152  | +    |
| 8758 | 1445813_at   | Region | Wdr27         | 71682  | 17   | 12872815  | 12987048  | -    |
| 8759 | 1456023_at   | Region | 2210010B09Rik | 244721 | 9    | 20454212  | 20467883  | +    |
| 8760 | 1457688_at   | Region | Zfp398        | 272347 | 6    | 47960121  | 47992931  | +    |
| 8761 | 1431693_a_at | Region | Il17b         | 56069  | 18   | 61916747  | 61921349  | +    |
| 8762 | 1445426_at   | Region | Map4k5        | 399510 | 12   | 66635229  | 66724562  | -    |
| 8763 | 1440025_at   | Region | Kptn          | 70394  | 7    | 16668     | 24276     | +    |
| 8764 | 1422375_a_at | Region | Art1          | 11870  | 7    | 96207701  | 96219891  | +    |
| 8765 | 1431737_at   | Region | None          | None   | 12   | 36821231  | 36823697  | +    |
| 8766 | 1444645_at   | Region | Sertad2       | 58172  | 11   | 20438127  | 20543916  | +    |
| 8767 | 1438733_at   | Region | Zfp689        | 71131  | 7    | 121491869 | 121498852 | -    |
| 8768 | 1429833_at   | Region | Ly6g6e        | 70274  | 17   | 32780722  | 32782584  | +    |
| 8769 | 1424315_at   | Region | 1110004E09Rik | 68001  | 16   | 90082869  | 90091849  | -    |
| 8770 | 1460050_x_at | Region | Klk6          | 16612  | 7    | 38299769  | 38303949  | +    |

|      |              |        |                |        |      |           |           |      |
|------|--------------|--------|----------------|--------|------|-----------|-----------|------|
| 8771 | 1431762_at   | Region | Htra3          | 78558  | 5    | 34139553  | 34167077  | -    |
| 8772 | 1415953_s_at | Region | Mark2          | 13728  | 19   | 6990598   | 7055161   | -    |
| 8773 | 1457638_x_at | Region | Rfc2           | 19718  | 5    | 93150     | 108790    | -    |
| 8774 | 1416652_at   | Region | Aspn           | 66695  | 13   | 49144054  | 49167081  | +    |
| 8775 | 1453465_x_at | Region | 4930402H24Rik  | 228602 | 2    | 130221684 | 130353963 | -    |
| 8776 | 1446219_at   | Region | D930015E06Rik  | 229473 | 3    | 83635417  | 83777077  | -    |
| 8777 | 1433129_at   | Region | 2900040J22Rik  | 72956  | 18   | 75704661  | 75705969  | -    |
| 8778 | 1456439_x_at | Region | Mical1         | 171580 | 10   | 41578201  | 41588854  | +    |
| 8779 | 1434886_at   | Region | D630048P19Rik  | 403187 | 7    | 16097225  | 16115805  | +    |
| 8780 | 1454818_at   | Region | Gmeb2          | 229004 | 2    | 180968408 | 181004923 | -    |
| 8781 | 1452886_at   | Region | Btbd5          | 66689  | 12   | 61720548  | 61743644  | -    |
| 8782 | 1436633_at   | Region | Gm1567         | 380741 | 11   | 120056327 | 120057401 | -    |
| 8783 | 1439080_at   | Region | Erbb2ip        | 59079  | 13   | 100037161 | 100140118 | -    |
| 8784 | 1421459_a_at | Region | Lrp8           | 16975  | 4    | 106761166 | 106833072 | +    |
| 8785 | 1428035_at   | Region | Fsip1          | 71313  | 2    | 117718736 | 117770802 | -    |
| 8786 | 1438905_x_at | Region | C030046I01Rik  | 109284 | 10   | 80033312  | 80039553  | -    |
| 8787 | 1452262_at   | Region | Grpel2         | 17714  | 18   | 61939158  | 61955132  | -    |
| 8788 | 1421196_at   | Region | Ptpn11         | 19247  | 5    | 120282348 | 120343136 | -    |
| 8789 | 1445451_at   | Region | None           | None   | 15   | 83623693  | 83624310  | -    |
| 8790 | 1449611_at   | Region | Kai1           | 12521  | 2    | 93123794  | 93167094  | -    |
| 8791 | 1417128_at   | Region | 2810052M02Rik  | 67220  | 3    | 95476660  | 95483671  | -    |
| 8792 | 1427503_at   | Region | AI324046       | 380795 | 12   | 108833057 | 108906536 | -    |
| 8793 | 1453389_a_at | Region | MGI:1345171    | 23921  | 5    | 135231641 | 135258395 | -    |
| 8794 | 1426192_at   | Region | Smarcd2        | 83796  | 11   | 106084275 | 106088711 | -    |
| 8795 | 1437870_at   | Region | Slco4c1        | 227394 | 1    | 96592770  | 96647174  | -    |
| 8796 | 1449818_at   | Region | Abcb4          | 18670  | 5    | 8900460   | 8965969   | +    |
| 8797 | 1417057_a_at | Region | Ppid /// Lamp3 | 239739 | 16   | 18424724  | 18477654  | -    |
| 8798 | 1451407_at   | Region | Jam4           | 72058  | 16   | 95842156  | 95884225  | +    |
| 8799 | 1433599_at   | Region | Baz1a          | 217578 | 12   | 51598034  | 51690813  | -    |
| 8800 | 1420479_a_at | Region | Nap11          | 53605  | 10   | 111105541 | 111122931 | +    |
| 8801 | 1443181_at   | Region | None           | None   | NONE | NONE      | NONE      | NONE |
| 8802 | 1421458_at   | Region | Zfp112         | 57745  | 7    | 19285997  | 19301733  | +    |
| 8803 | 1438951_x_at | Region | Nup54          | 269113 | 5    | 91751291  | 91770868  | -    |
| 8804 | 1431991_at   | Region | 2410004P03Rik  | 73667  | 12   | 16371877  | 16420917  | -    |
| 8805 | 1453405_at   | Region | 2610311B01Rik  | 78390  | 2    | 119780144 | 119782753 | -    |
| 8806 | 1454061_at   | Region | Thumpd3        | 14911  | 6    | 113609303 | 113631351 | +    |
| 8807 | 1446464_at   | Region | Psme4          | 103554 | 11   | 30666852  | 30774524  | +    |
| 8808 | 1435483_x_at | Region | MGI:1917156    | 69906  | 15   | 38993909  | 39012345  | -    |
| 8809 | 1439632_at   | Region | Gnb4           | 14696  | 3    | 31991704  | 32024713  | -    |
| 8810 | 1432939_at   | Region | None           | None   | 14   | 112457825 | 112459678 | -    |
| 8811 | 1459794_at   | Region | Bcl2l11        | 12125  | 2    | 127639891 | 127676025 | +    |
| 8812 | 1447397_at   | Region | 1700129I04Rik  | 330577 | 7    | 76489483  | 76505046  | -    |
| 8813 | 1455415_at   | Region | A730056A06Rik  | 319783 | 7    | 67200765  | 67201391  | -    |
| 8814 | 1456989_at   | Region | None           | None   | 14   | 114592687 | 114593086 | -    |
| 8815 | 1425565_at   | Region | Rest           | 19712  | 5    | 76512186  | 76527229  | +    |
| 8816 | 1422004_at   | Region | D730048I06Rik  | 68171  | 9    | 35700509  | 35702571  | -    |
| 8817 | 1452538_at   | Region | Igh-4          | 16017  | 12   | 108802515 | 109842781 | -    |
| 8818 | 1417844_at   | Region | Vdrip          | 67381  | 14   | 67861484  | 67869980  | +    |
| 8819 | 1441542_at   | Region | Drp2           | 13497  | X    | 127949776 | 127998338 | +    |
| 8820 | 1460597_at   | Region | Asxl2          | 75302  | 12   | 1933      | 29919     | +    |
| 8821 | 1426702_at   | Region | 4632419K20Rik  | 74349  | 7    | 99490967  | 99512368  | -    |
| 8822 | 1440766_at   | Region | C77032         | 30877  | 14   | 29144393  | 29151021  | -    |
| 8823 | 1444152_at   | Region | Cugbp2         | 14007  | 2    | 6459141   | 6638885   | -    |
| 8824 | 1420485_at   | Region | Nol7           | 70078  | 13   | 42960833  | 42965301  | +    |
| 8825 | 1448953_at   | Region | Blm            | 12144  | 7    | 74257792  | 74337688  | -    |
| 8826 | 1440728_at   | Region | Kcnma1         | 16531  | 14   | 21672901  | 22164598  | -    |
| 8827 | 1432577_at   | Region | None           | None   | 13   | 109055057 | 109056235 | -    |
| 8828 | 1425776_a_at | Region | C87436         | 232196 | 6    | 86827909  | 86902412  | +    |
| 8829 | 1431083_a_at | Region | 1810014B01Rik  | 544717 | 10   | 82507736  | 82511798  | -    |
| 8830 | 1432842_s_at | Region | Ywhaq          | 22630  | 12   | 18728420  | 18754333  | +    |
| 8831 | 1444835_at   | Region | BC030499       | 216976 | 11   | 109439    | 110664    | +    |
| 8832 | 1456687_at   | Region | Arih1          | 23806  | 9    | 59509355  | 59603044  | -    |
| 8833 | 1460074_x_at | Region | Epdr2          | 105298 | 13   | 19073208  | 19101305  | -    |
| 8834 | 1449677_s_at | Region | Tmem38b        | 52076  | 4    | 53741941  | 53776470  | +    |
| 8835 | 1437645_at   | Region | Atf7           | 223922 | 15   | 102597062 | 102685840 | -    |

|      |              |        |               |        |      |           |           |      |
|------|--------------|--------|---------------|--------|------|-----------|-----------|------|
| 8836 | 1420846_at   | Region | Mrps2         | 118451 | 2    | 28400228  | 28403339  | +    |
| 8837 | 1439456_x_at | Region | Atp6ap2       | 70495  | X    | 10826811  | 10855905  | +    |
| 8838 | 1447493_at   | Region | A530088H08Rik | 193003 | 11   | 66637641  | 66654350  | +    |
| 8839 | 1418622_at   | Region | Rab2          | 59021  | 4    | 8462790   | 8534848   | +    |
| 8840 | 1419265_at   | Region | 1200014M14Rik | 67463  | 13   | 92579692  | 92606895  | +    |
| 8841 | 1438138_a_at | Region | Pex6          | 224824 | 17   | 44222425  | 44236648  | +    |
| 8842 | 1446182_at   | Region | Zmynd11       | 66505  | 13   | 9669934   | 9749340   | -    |
| 8843 | 1449223_at   | Region | Dnajb8        | 56691  | 6    | 88657640  | 88658670  | +    |
| 8844 | 1430076_at   | Region | 4930432J16Rik | 76872  | 16   | 15910017  | 15918238  | -    |
| 8845 | 1456507_at   | Region | Zfp454        | 237758 | 11   | 50625563  | 50640284  | -    |
| 8846 | 1426008_a_at | Region | Slc7a2        | 11988  | 8    | 39830084  | 39853621  | +    |
| 8847 | 1457258_at   | Region | None          | None   | 5    | 76712866  | 76713102  | +    |
| 8848 | 1434108_at   | Region | Fbxo11        | 225055 | 17   | 85850006  | 85924399  | -    |
| 8849 | 1444217_at   | Region | Mrpl38        | 60441  | 11   | 115952914 | 115959871 | -    |
| 8850 | 1437488_at   | Region | Slc9a9        | 331004 | 9    | 94575744  | 95138101  | +    |
| 8851 | 1420004_s_at | Region | Pom121        | 107939 | 5    | 134389633 | 134408002 | -    |
| 8852 | 1425419_a_at | Region | Raf1          | 110157 | 6    | 116056173 | 116114081 | -    |
| 8853 | 1417158_at   | Region | Zxdc          | 80292  | 6    | 90805539  | 90839567  | +    |
| 8854 | 1438515_at   | Region | None          | None   | 11   | 80126619  | 80127482  | +    |
| 8855 | 1455003_at   | Region | Thap1         | 73754  | 8    | 24882962  | 24887689  | +    |
| 8856 | 1459648_at   | Region | Rutbc3        | 105835 | 15   | 81030424  | 81064690  | +    |
| 8857 | 1459004_at   | Region | Sorl1         | 20660  | 9    | 41927330  | 42082982  | -    |
| 8858 | 1417841_at   | Region | Pxmp2         | 19301  | 5    | 109325344 | 109336789 | -    |
| 8859 | 1432293_at   | Region | 4930579G18Rik | 75913  | 14   | 49167228  | 49171458  | +    |
| 8860 | 1457537_at   | Region | Rab1          | 19324  | 11   | 20096395  | 20121649  | +    |
| 8861 | 1429154_at   | Region | Slc35f2       | 72022  | 9    | 53875397  | 53921607  | +    |
| 8862 | 1434534_at   | Region | None          | None   | 18   | 20178509  | 20180097  | -    |
| 8863 | 1443360_x_at | Region | Arhgap4       | 171207 | X    | 68555013  | 68571884  | -    |
| 8864 | 1453348_at   | Region | 1700085D22Rik | 73512  | 8    | 71699213  | 71700495  | +    |
| 8865 | 1441120_at   | Region | None          | None   | 7    | 67546     | 73851     | +    |
| 8866 | 1422886_a_at | Region | Clk4          | 12750  | 11   | 51016012  | 51034605  | +    |
| 8867 | 1447659_x_at | Region | Atp6v1h       | 108664 | 1    | 5048448   | 5126164   | +    |
| 8868 | 1437112_at   | Region | Pld1          | 18805  | 3    | 27441540  | 27550616  | +    |
| 8869 | 1439949_at   | Region | Gsk3b         | 56637  | 16   | 36906890  | 37063968  | +    |
| 8870 | 1423546_at   | Region | Zfp207        | 22680  | 11   | 80109005  | 80121796  | +    |
| 8871 | 1457611_x_at | Region | 2010309E21Rik | 66488  | 6    | 4013569   | 4015176   | +    |
| 8872 | 1445188_at   | Region | Gphn          | 268566 | 12   | 75199951  | 75541337  | +    |
| 8873 | 1444469_at   | Region | 1110059H15Rik | 68795  | 2    | 69802617  | 69879409  | +    |
| 8874 | 1455264_at   | Region | 1110035L05Rik | 67389  | 4    | 154454680 | 154458991 | +    |
| 8875 | 1440748_at   | Region | Scarf1        | 380713 | 11   | 75239199  | 75252230  | +    |
| 8876 | 1450776_at   | Region | AU041707      | 102247 | 8    | 21927525  | 21962925  | -    |
| 8877 | 1442846_at   | Region | Pbx1          | 18514  | 1    | 168054563 | 168366387 | -    |
| 8878 | 1425524_at   | Region | 2600011C06Rik | 67039  | 12   | 80506670  | 80547102  | +    |
| 8879 | 1419778_at   | Region | None          | None   | 4    | 103706472 | 103706861 | +    |
| 8880 | 1420939_at   | Region | Hs6st2        | 50786  | X    | 45909852  | 46201195  | -    |
| 8881 | 1446924_at   | Region | None          | None   | 19   | 53513363  | 53513941  | +    |
| 8882 | 1455745_at   | Region | None          | None   | 8    | 14279141  | 14279990  | +    |
| 8883 | 1416602_a_at | Region | Rad52         | 19365  | 6    | 120335139 | 120355247 | +    |
| 8884 | 1430638_at   | Region | 1700041C02Rik | 73332  | 4    | 118281798 | 118374408 | -    |
| 8885 | 1429252_at   | Region | 0610010K14Rik | 104457 | 11   | 69960866  | 69963572  | -    |
| 8886 | 1448048_at   | Region | BC016495      | 225994 | 19   | 17878968  | 17899143  | +    |
| 8887 | 1452015_at   | Region | 6330416G13Rik | 230279 | 4    | 62651547  | 62677546  | +    |
| 8888 | 1452010_at   | Region | Chrna3        | 110834 | 9    | 55131846  | 55145722  | -    |
| 8889 | 1422781_at   | Region | Tlr3          | 142980 | 8    | 44343914  | 44358907  | -    |
| 8890 | 1437338_x_at | Region | Elp3          | 74195  | 14   | 60057876  | 60120430  | -    |
| 8891 | 1418923_at   | Region | Slc17a3       | 105355 | 13   | 23319506  | 23339620  | +    |
| 8892 | 1420312_s_at | Region | None          | None   | NONE | NONE      | NONE      | NONE |
| 8893 | 1443025_at   | Region | None          | None   | 1    | 81658113  | 81658758  | +    |
| 8894 | 1447781_s_at | Region | Rg9mtd2       | 108943 | 3    | 137032375 | 137047205 | +    |
| 8895 | 1418541_at   | Region | 2810429O05Rik | 52504  | 12   | 3365090   | 3394126   | -    |
| 8896 | 1427463_at   | Region | MGI:2384865   | 213819 | 6    | 4553951   | 4596266   | +    |
| 8897 | 1445269_at   | Region | Mrps18c       | 68735  | 5    | 99819412  | 99825120  | +    |
| 8898 | 1418959_at   | Region | Tmprss5       | 80893  | 9    | 49132999  | 49147914  | +    |
| 8899 | 1456679_at   | Region | Obfc1         | 108689 | 19   | 47052348  | 47088320  | -    |
| 8900 | 1451359_at   | Region | BC005662      | 210992 | 13   | 69524486  | 69573696  | +    |

|      |              |        |                     |        |      |           |           |      |
|------|--------------|--------|---------------------|--------|------|-----------|-----------|------|
| 8901 | 1440032_at   | Region | E130008O17Rik       | 320518 | 1    | 128016906 | 128017591 | +    |
| 8902 | 1453025_at   | Region | 1110033L15Rik       | 73752  | 2    | 139909324 | 139934342 | +    |
| 8903 | 1442538_at   | Region | Rcor3               | 214742 | 1    | 191839449 | 191876966 | -    |
| 8904 | 1430138_at   | Region | Cd3eap              | 70333  | 7    | 16226093  | 16228663  | -    |
| 8905 | 1443227_at   | Region | Bzw2                | 66912  | 12   | 32698936  | 32763848  | -    |
| 8906 | 1458331_x_at | Region | 1700122C07Rik       | 67935  | 8    | 92783046  | 92819879  | -    |
| 8907 | 1453998_at   | Region | Smap1               | 98366  | 1    | 24090771  | 24166945  | -    |
|      |              |        | Rpl37 ///           |        |      |           |           |      |
| 8908 | 1450838_x_at | Region | LOC383438           | 383438 | 19   | 15249551  | 15249820  | +    |
| 8909 | 1457435_x_at | Region | Myom2               | 17930  | 8    | 14436135  | 14512023  | +    |
| 8910 | 1421648_at   | Region | Nlgn1               | 192167 | 3    | 24847948  | 25748398  | -    |
| 8911 | 1437884_at   | Region | Arl8                | 75869  | 2    | 14981634  | 15005463  | +    |
| 8912 | 1422242_at   | Region | Defcr-rs10          | 13219  | NONE | NONE      | NONE      | NONE |
| 8913 | 1442997_at   | Region | Odz3                | 23965  | 8    | 47191599  | 47638956  | -    |
| 8914 | 1459178_at   | Region | D8Erttd503e         | 52366  | 8    | 117235428 | 117236176 | +    |
| 8915 | 1434123_at   | Region | Fut11               | 73068  | 14   | 19056280  | 19061509  | +    |
| 8916 | 1451487_at   | Region | Rabepk              | 227746 | 2    | 34710828  | 34731953  | -    |
| 8917 | 1426672_at   | Region | Al604832            | 102566 | 9    | 122196041 | 122314536 | -    |
| 8918 | 1422794_at   | Region | Cul3                | 26554  | 1    | 80599109  | 80655022  | -    |
| 8919 | 1457434_s_at | Region | Ptpla               | 30963  | 2    | 13953103  | 13982307  | -    |
| 8920 | 1450993_at   | Region | Pask                | 269224 | 1    | 93136928  | 93165065  | -    |
| 8921 | 1424327_at   | Region | 3200002M19Rik       | 75430  | 7    | 96002510  | 96005638  | +    |
| 8922 | 1441942_x_at | Region | Rnut1               | 66069  | 9    | 57064413  | 57096688  | +    |
| 8923 | 1431409_at   | Region | C030015A19Rik       | 77418  | 6    | 90823015  | 90824268  | +    |
| 8924 | 1438735_at   | Region | Hbxap               | 233532 | 7    | 91626175  | 91732691  | +    |
| 8925 | 1435818_at   | Region | None                | None   | X    | 88937780  | 88938354  | +    |
| 8926 | 1419928_at   | Region | Lrig1               | 16206  | 6    | 95066417  | 95161798  | -    |
| 8927 | 1430210_at   | Region | C330024D12Rik       | 78444  | 7    | 62120928  | 62133948  | -    |
| 8928 | 1444206_at   | Region | None                | None   | NONE | NONE      | NONE      | NONE |
| 8929 | 1452208_at   | Region | Prdm4               | 72843  | 10   | 85852908  | 85878083  | -    |
| 8930 | 1422819_at   | Region | Mrpl36              | 94066  | 13   | 69386508  | 69387677  | +    |
| 8931 | 1459564_at   | Region | C87580              | 97569  | NONE | NONE      | NONE      | NONE |
| 8932 | 1449517_at   | Region | Qpctl               | 67369  | 7    | 16008978  | 16017957  | -    |
| 8933 | 1416886_at   | Region | MGI:1927354         | 57316  | 11   | 17152411  | 17163969  | +    |
| 8934 | 1433798_a_at | Region | E330034G19Rik       | 105418 | 14   | 22648374  | 22677449  | +    |
| 8935 | 1429990_at   | Region | Hyal4               | 77042  | 6    | 24797831  | 24817147  | +    |
| 8936 | 1449247_at   | Region | MGI:1920603         | 73353  | 4    | 153158794 | 153160095 | -    |
| 8937 | 1426638_at   | Region | Six3                | 20473  | 17   | 83450633  | 83453317  | +    |
| 8938 | 1459493_at   | Region | Setbp1              | 240427 | 18   | 78876677  | 79209594  | -    |
| 8939 | 1418482_at   | Region | Cyb561d2            | 56368  | 9    | 107604792 | 107607646 | -    |
| 8940 | 1443288_at   | Region | Traf6               | 22034  | 2    | 101383123 | 101405659 | +    |
| 8941 | 1419124_at   | Region | 2210010L05Rik       | 98682  | 1    | 52961158  | 53031019  | -    |
| 8942 | 1450658_at   | Region | Adamts5             | 23794  | 16   | 84962621  | 85000488  | -    |
| 8943 | 1419025_at   | Region | Sag                 | 20215  | 1    | 87620465  | 87661728  | +    |
| 8944 | 1443953_at   | Region | Tex2                | 21763  | 11   | 106323228 | 106434019 | -    |
| 8945 | 1426291_at   | Region | 1500031M22Rik       | 66254  | 13   | 103155563 | 103168048 | +    |
| 8946 | 1460142_at   | Region | D13Erttd324e        | 52604  | 13   | 92173696  | 92174713  | -    |
| 8947 | 1456296_at   | Region | 5830418K08Rik       | 319675 | 9    | 15154056  | 15170640  | -    |
| 8948 | 1454719_at   | Region | 5730411O18Rik       | 279766 | 11   | 4994225   | 5000878   | +    |
| 8949 | 1424042_at   | Region | Tmem5               | 216395 | 10   | 121740118 | 121755674 | -    |
| 8950 | 1441344_at   | Region | Spfh1               | 226144 | 19   | 43579353  | 43613932  | -    |
| 8951 | 1419046_at   | Region | Brp16               | 59053  | 15   | 76417980  | 76420765  | +    |
| 8952 | 1456559_at   | Region | Emx2os              | 329078 | NONE | NONE      | NONE      | NONE |
| 8953 | 1419934_at   | Region | Pdrg1               | 68559  | 2    | 152465826 | 152472319 | -    |
| 8954 | 1420638_at   | Region | Prps2               | 110639 | X    | 160945738 | 160982104 | -    |
| 8955 | 1438223_at   | Region | None                | None   | NONE | NONE      | NONE      | NONE |
| 8956 | 1430341_at   | Region | Nudt5               | 53893  | 2    | 5762306   | 5786008   | +    |
| 8957 | 1422083_at   | Region | Tlr9                | 81897  | 9    | 106216193 | 106220471 | +    |
| 8958 | 1453114_at   | Region | 4632412I24Rik       | 74035  | 4    | 150531696 | 150553856 | +    |
| 8959 | 1445006_at   | Region | None                | None   | 13   | 41565045  | 41565899  | +    |
|      |              |        | Pramel4 /// Pramel5 |        |      |           |           |      |
| 8960 | 1438468_at   | Region | /// LOC545696       | 347709 | 4    | 142980947 | 142983963 | +    |
| 8961 | 1454117_at   | Region | 5330439B14Rik       | 321015 | 6    | 143457864 | 143469731 | +    |
| 8962 | 1455163_at   | Region | AA407526            | 231279 | 5    | 68325793  | 68340721  | +    |

|      |              |        |               |        |      |           |           |      |
|------|--------------|--------|---------------|--------|------|-----------|-----------|------|
| 8963 | 1423293_at   | Region | Rpa1          | 68275  | 11   | 75026006  | 75073962  | -    |
| 8964 | 1436018_at   | Region | None          | None   | 3    | 88282768  | 88285258  | +    |
| 8965 | 1422729_at   | Region | Pcdhb10       | 93881  | 18   | 37635595  | 37637988  | +    |
| 8966 | 1453551_at   | Region | Polq          | 77782  | 16   | 35831253  | 35914864  | +    |
| 8967 | 1428292_at   | Region | Ndor1         | 78797  | 2    | 25176981  | 25187540  | -    |
| 8968 | 1422363_at   | Region | Olfr64        | 18365  | 7    | 98015814  | 98019893  | +    |
| 8969 | 1446205_at   | Region | Nfyc          | 18046  | 4    | 119779882 | 119848111 | -    |
| 8970 | 1418554_at   | Region | Admr          | 11536  | 10   | 127486332 | 127488403 | -    |
| 8971 | 1451311_a_at | Region | Adipor1       | 72674  | 1    | 134285743 | 134282600 | +    |
| 8972 | 1447416_at   | Region | LOC544740     | 544740 | 10   | 116466001 | 116485583 | -    |
| 8973 | 1428098_a_at | Region | Tm7sf3        | 67623  | 6    | 147522941 | 147555233 | -    |
| 8974 | 1442727_at   | Region | None          | None   | NONE | NONE      | NONE      | NONE |
| 8975 | 1428337_at   | Region | 1810034K20Rik | 67881  | 14   | 50175921  | 50178429  | -    |
| 8976 | 1450498_at   | Region | Mthfr         | 17769  | 4    | 146533584 | 146551911 | +    |
| 8977 | 1420449_at   | Region | A230048G03Rik | 320473 | 17   | 76575104  | 76657599  | -    |
| 8978 | 1458214_at   | Region | A730012O14Rik | 330301 | 6    | 47943627  | 47954860  | -    |
| 8979 | 1426080_a_at | Region | Kcnq2         | 16536  | 2    | 180792537 | 180852183 | -    |
| 8980 | 1423719_at   | Region | U46068        | 228801 | 2    | 153647755 | 153677280 | +    |
| 8981 | 1446846_at   | Region | None          | None   | 11   | 3215202   | 3215778   | +    |
| 8982 | 1420041_at   | Region | None          | None   | 12   | 51612712  | 51613144  | -    |
| 8983 | 1445024_at   | Region | Stard7        | 99138  | 2    | 126784092 | 126812786 | +    |
| 8984 | 1421410_a_at | Region | Pstpip2       | 19201  | 18   | 77916484  | 78001401  | +    |
| 8985 | 1445126_at   | Region | Ldb2          | 16826  | 5    | 43229785  | 43558377  | -    |
| 8986 | 1433579_at   | Region | Tmem30b       | 238257 | 12   | 70390928  | 70394209  | -    |
| 8987 | 1435939_s_at | Region | AI987662      | 101202 | 6    | 3409611   | 3447020   | -    |
| 8988 | 1427063_at   | Region | 5330417C22Rik | 229722 | 3    | 108251436 | 108332283 | -    |
| 8989 | 1452114_s_at | Region | Igfbp5        | 16011  | 1    | 73159719  | 73176568  | -    |
| 8990 | 1460190_at   | Region | Ap1m2         | 11768  | 9    | 21181723  | 21198572  | -    |
| 8991 | 1451112_s_at | Region | Dap           | 223453 | 15   | 31222609  | 31273841  | +    |
| 8992 | 1418294_at   | Region | Epb4.114b     | 54357  | 4    | 57005188  | 57087097  | -    |
| 8993 | 1444409_at   | Region | Rph3al        | 380714 | 11   | 75557816  | 75636684  | -    |
| 8994 | 1420545_a_at | Region | Chn1          | 108699 | 2    | 73308494  | 73358115  | -    |
| 8995 | 1454681_at   | Region | 2210008M09Rik | 207920 | 4    | 11258898  | 11311338  | -    |
| 8996 | 1457877_at   | Region | Esr1          | 13982  | 10   | 5503826   | 5892641   | -    |
| 8997 | 1419408_at   | Region | Six6          | 20476  | 12   | 69787131  | 69792085  | +    |
| 8998 | 1419879_s_at | Region | Trim25        | 217069 | 11   | 88820567  | 88841380  | +    |
| 8999 | 1423732_at   | Region | Tram1         | 72265  | 1    | 13697903  | 13722901  | -    |
| 9000 | 1416441_at   | Region | MGI:1889205   | 54381  | 15   | 33211945  | 33593530  | +    |
| 9001 | 1423790_at   | Region | Dap           | 223453 | 15   | 31222609  | 31273841  | +    |
| 9002 | 1428141_at   | Region | Gga2          | 74105  | 7    | 115864580 | 115899025 | -    |
| 9003 | 1423670_a_at | Region | Srpr          | 67398  | 9    | 35125247  | 35131047  | +    |
| 9004 | 1453568_at   | Region | 2310032F03Rik | 76747  | 2    | 59340053  | 59360334  | +    |
| 9005 | 1449939_s_at | Region | Dlk1          | 13386  | 12   | 104931713 | 104938825 | +    |
| 9006 | 1439427_at   | Region | Cldn9         | 56863  | 17   | 21485176  | 21485829  | -    |
| 9007 | 1452770_at   | Region | Vkorc1        | 27973  | 7    | 121942873 | 121945427 | -    |
| 9008 | 1439822_at   | Region | None          | None   | 2    | 174259045 | 174259767 | -    |
| 9009 | 1451978_at   | Region | Lox1          | 16949  | 9    | 58402901  | 58427658  | -    |
| 9010 | 1439031_at   | Region | Jph4          | 319984 | 14   | 49623897  | 49633349  | -    |
| 9011 | 1445897_s_at | Region | Ifi35         | 70110  | 11   | 101269568 | 101279549 | +    |
| 9012 | 1425041_at   | Region | Lhx3          | 16871  | 2    | 26133109  | 26140411  | -    |
| 9013 | 1450482_a_at | Region | Pitx2         | 18741  | 3    | 128131958 | 128151601 | +    |
| 9014 | 1447385_at   | Region | None          | None   | 16   | 9243076   | 9243485   | -    |
| 9015 | 1425603_at   | Region | 0610011I04Rik | 66058  | 6    | 48974286  | 48979812  | +    |
| 9016 | 1456552_at   | Region | None          | None   | 9    | 98848567  | 98849123  | -    |
| 9017 | 1417272_at   | Region | 9130005N14Rik | 68303  | 5    | 63771941  | 63843703  | +    |
| 9018 | 1441811_x_at | Region | 0610011I04Rik | 66058  | 6    | 48974286  | 48979812  | +    |
| 9019 | 1454760_at   | Region | Htatsf1       | 72459  | X    | 51808329  | 51821897  | +    |
| 9020 | 1427447_a_at | Region | Triobp        | 110253 | 15   | 78999010  | 79031429  | +    |
| 9021 | 1436268_at   | Region | Ddn           | 13199  | 15   | 98852014  | 98866922  | -    |
| 9022 | 1415856_at   | Region | Emb           | 13723  | 13   | 113672954 | 113726420 | +    |
| 9023 | 1455824_x_at | Region | Itm1          | 16430  | 9    | 36668263  | 36704803  | -    |
| 9024 | 1452953_at   | Region | 1810036I24Rik | 67510  | 11   | 62605140  | 62620834  | +    |
| 9025 | 1415857_at   | Region | Emb           | 13723  | 13   | 113672954 | 113726420 | +    |
| 9026 | 1424382_at   | Region | Rcn3          | 52377  | 7    | 39159455  | 39168705  | -    |
| 9027 | 1452056_s_at | Region | Ppp3ca        | 19055  | 3    | 135555655 | 135820664 | +    |

|      |              |        |               |        |    |           |           |   |
|------|--------------|--------|---------------|--------|----|-----------|-----------|---|
| 9028 | 1452671_s_at | Region | Lman1         | 70361  | 18 | 66213875  | 66235740  | - |
| 9029 | 1417460_at   | Region | Ifitm2        | 80876  | 7  | 135356826 | 135357948 | - |
| 9030 | 1450795_at   | Region | Lhb           | 16866  | 7  | 39498047  | 39498872  | + |
| 9031 | 1457077_at   | Region | None          | None   | X  | 151416131 | 151417519 | - |
| 9032 | 1429105_at   | Region | Dlgap1        | 224997 | 17 | 68195196  | 68591524  | + |
| 9033 | 1450784_at   | Region | Reck          | 53614  | 4  | 43791522  | 43860442  | + |
| 9034 | 1460419_a_at | Region | Prkcb1        | 18751  | 7  | 116167155 | 116506625 | + |
| 9035 | 1433701_at   | Region | D15Bwg0669e   | 223726 | 15 | 83828622  | 83907073  | + |
| 9036 | 1422498_at   | Region | Mageh1        | 75625  | X  | 146570562 | 146571748 | - |
| 9037 | 1419569_a_at | Region | Isg20         | 57444  | 7  | 72705925  | 72712471  | + |
| 9038 | 1423478_at   | Region | Prkcb1        | 18751  | 7  | 116167155 | 116506625 | + |
| 9039 | 1455936_a_at | Region | Rbpms         | 19663  | 8  | 32589665  | 32735420  | - |
| 9040 | 1421396_at   | Region | Pcsk1         | 18548  | 13 | 71146157  | 71188465  | + |
| 9041 | 1448848_at   | Region | None          | None   | 2  | 30885134  | 30891176  | + |
| 9042 | 1455225_at   | Region | Syne1         | 64009  | 10 | 4960414   | 5487942   | + |
| 9043 | 1415828_a_at | Region | D3Ucla1       | 28146  | 3  | 58166332  | 58170108  | - |
| 9044 | 1434969_at   | Region | None          | None   | 10 | 81592298  | 81592936  | - |
| 9045 | 1417379_at   | Region | Iqgap1        | 29875  | 7  | 74515481  | 74605994  | - |
| 9046 | 1450841_at   | Region | Itm1          | 16430  | 9  | 36668263  | 36704803  | - |
| 9047 | 1448149_at   | Region | Ctnna1        | 12385  | 18 | 35342570  | 35478433  | + |
| 9048 | 1428624_at   | Region | 2810482107Rik | 67243  | X  | 100569431 | 100571394 | - |
| 9049 | 1452178_at   | Region | Plec1         | 18810  | 15 | 76219648  | 76280050  | - |
| 9050 | 1449139_at   | Region | 2310008M10Rik | 66357  | 3  | 129626476 | 129640041 | - |
| 9051 | 1433674_a_at | Region | Rnu22         | 83673  | 19 | 7920687   | 7922991   | + |
| 9052 | 1418545_at   | Region | Wasf1         | 83767  | 10 | 41029716  | 41047932  | + |
| 9053 | 1423316_at   | Region | Tmem39a       | 67846  | 16 | 37385037  | 37413429  | + |
| 9054 | 1420624_a_at | Region | Vamp8         | 22320  | 6  | 72717197  | 72722555  | - |
| 9055 | 1433833_at   | Region | Fndc3b        | 72007  | 3  | 26833958  | 27060578  | - |
| 9056 | 1450910_at   | Region | Cap2          | 67252  | 13 | 46100466  | 46248597  | + |
| 9057 | 1416167_at   | Region | Prdx4         | 53381  | X  | 148950069 | 148964603 | - |
| 9058 | 1416108_a_at | Region | Tmed3         | 66111  | 9  | 89586270  | 89592056  | - |
| 9059 | 1419978_s_at | Region | D10Ertd610e   | 52666  | 10 | 126915321 | 126923060 | - |
| 9060 | 1426918_at   | Region | Itgb1         | 16412  | 8  | 3634      | 31325     | + |
| 9061 | 1455458_x_at | Region | Gmpa          | 69080  | 1  | 75726707  | 75733896  | + |
| 9062 | 1418004_a_at | Region | 1810009M01Rik | 65963  | 6  | 48966591  | 48973744  | - |
| 9063 | 1449740_s_at | Region | Dsg2          | 13511  | 18 | 20773051  | 20817758  | + |
| 9064 | 1453014_a_at | Region | Sec311i       | 69162  | 5  | 99380288  | 99448544  | - |
| 9065 | 1437086_at   | Region | Ascl1         | 17172  | 10 | 87463685  | 87466044  | - |
| 9066 | 1420867_at   | Region | 1110032D12Rik | 56334  | 5  | 123712134 | 123721846 | + |
| 9067 | 1449063_at   | Region | Sec221i       | 20333  | 3  | 97387503  | 97408594  | + |
| 9068 | 1416627_at   | Region | Spint1        | 20732  | 2  | 118751326 | 118763044 | + |
| 9069 | 1440980_at   | Region | Kcnh8         | 211468 | 17 | 50487209  | 50488364  | - |
| 9070 | 1417336_a_at | Region | Sytl4         | 27359  | X  | 127481324 | 127526722 | - |
| 9071 | 1418355_at   | Region | Nucb2         | 53322  | 7  | 110370258 | 110406443 | + |
| 9072 | 1416326_at   | Region | Crip1         | 12925  | 12 | 108628197 | 108630021 | + |
| 9073 | 1429024_at   | Region | 1110018J23Rik | 73713  | 19 | 53411329  | 53445957  | + |
| 9074 | 1451132_at   | Region | Pbxip1        | 229534 | 3  | 89193476  | 89205693  | + |
| 9075 | 1455085_at   | Region | 1700086L19Rik | 74284  | 12 | 71140731  | 71152721  | + |
| 9076 | 1426393_a_at | Region | Sdf4          | 20318  | 4  | 154485276 | 154505972 | + |
| 9077 | 1450123_at   | Region | Ryr2          | 20191  | 13 | 11561136  | 11985749  | - |
| 9078 | 1421223_a_at | Region | Anxa4         | 11746  | 6  | 87171158  | 87227870  | - |
| 9079 | 1459740_s_at | Region | Ucp2          | 22228  | 7  | 94600035  | 94608691  | + |
| 9080 | 1419091_a_at | Region | Anxa2         | 12306  | 9  | 69585297  | 69623409  | + |
| 9081 | 1437465_a_at | Region | P4hb          | 18453  | 11 | 120381397 | 120394029 | - |
| 9082 | 1455074_at   | Region | None          | None   | 16 | 13701828  | 13703156  | + |
| 9083 | 1428986_at   | Region | Slc17a7       | 72961  | 7  | 39246100  | 39252681  | + |
| 9084 | 1448669_at   | Region | Dkk3          | 50781  | 7  | 105969156 | 106012196 | - |
| 9085 | 1437396_at   | Region | Creb3l2       | 208647 | 6  | 37465296  | 37576712  | - |
| 9086 | 1416440_at   | Region | Cd164         | 53599  | 10 | 41621324  | 41632866  | + |
| 9087 | 1450708_at   | Region | Scg2          | 20254  | 1  | 79772940  | 79774793  | - |
| 9088 | 1423802_at   | Region | Camkv         | 235604 | 9  | 108003907 | 108017678 | + |
| 9089 | 1438194_at   | Region | 2900019G14Rik | 72932  | 2  | 102494336 | 102495534 | + |
| 9090 | 1437119_at   | Region | Ern1          | 78943  | 11 | 106218709 | 106308885 | - |
| 9091 | 1426015_s_at | Region | Asph          | 65973  | 4  | 9376231   | 9595958   | - |
| 9092 | 1439755_at   | Region | Sipa111       | 217692 | 12 | 79172130  | 79311045  | + |



|      |              |        |               |        |    |           |           |   |
|------|--------------|--------|---------------|--------|----|-----------|-----------|---|
| 9093 | 1416241_at   | Region | Sec13l1       | 110379 | 6  | 114296639 | 114309268 | - |
| 9094 | 1426832_at   | Region | 6330505F04Rik | 236790 | X  | 51209591  | 51262553  | + |
| 9095 | 1455968_x_at | Region | 1110032D12Rik | 56334  | 5  | 123712134 | 123721846 | + |
| 9096 | 1428112_at   | Region | Armet         | 74840  | 9  | 106954542 | 106957696 | - |
| 9097 | 1448229_s_at | Region | Ccnd2         | 12444  | 6  | 127802641 | 127824339 | - |
| 9098 | 1449007_at   | Region | Btg3          | 12228  | 16 | 77445330  | 77462255  | - |
| 9099 | 1439611_at   | Region | Chrm1         | 12669  | 19 | 7860376   | 7878114   | + |
| 9100 | 1423754_at   | Region | Ifitm3        | 66141  | 7  | 135411577 | 135412731 | - |
| 9101 | 1420886_a_at | Region | Xbp1          | 22433  | 11 | 5415754   | 5420659   | + |
| 9102 | 1429059_s_at | Region | 1110004B13Rik | 66910  | 11 | 68796467  | 68798950  | + |
| 9103 | 1429069_at   | Region | Stub1         | 56424  | 17 | 23636797  | 23639522  | - |
| 9104 | 1424621_at   | Region | AA792894      | 57896  | 6  | 71603943  | 71617243  | + |
| 9105 | 1418790_at   | Region | Zfp312        | 54713  | 14 | 10799639  | 10803365  | - |
| 9106 | 1451483_s_at | Region | 1700054N08Rik | 73420  | 8  | 123127903 | 123147281 | - |
| 9107 | 1434507_at   | Region | Npepl1        | 228961 | 2  | 173535272 | 173547609 | + |
| 9108 | 1452428_a_at | Region | B2m           | 12010  | 2  | 121661540 | 121666935 | + |
| 9109 | 1423396_at   | Region | Agt           | 11606  | 8  | 123843659 | 123851653 | - |
| 9110 | 1423231_at   | Region | Nrgn          | 64011  | 9  | 37486032  | 37494348  | - |
| 9111 | 1439476_at   | Region | Dsg2          | 13511  | 18 | 20773051  | 20817758  | + |
| 9112 | 1422748_at   | Region | Zfhx1b        | 24136  | 2  | 44919283  | 45045178  | - |
| 9113 | 1451449_at   | Region | 4933407N01Rik | 66753  | 11 | 30826209  | 30848913  | - |
| 9114 | 1424094_at   | Region | Nek9          | 217718 | 12 | 82167435  | 82204517  | - |
| 9115 | 1427528_a_at | Region | Epha7         | 13841  | 4  | 28997442  | 29149372  | + |
| 9116 | 1437783_x_at | Region | Tmem4         | 56530  | 10 | 128059278 | 128064006 | + |
| 9117 | 1418331_at   | Region | 1110031I02Rik | 66179  | 11 | 120998686 | 121025741 | - |
| 9118 | 1422455_s_at | Region | Nsf           | 18195  | 11 | 103642871 | 103775145 | - |
| 9119 | 1449679_s_at | Region | Stx5a         | 56389  | 19 | 7938367   | 7952189   | + |
| 9120 | 1423975_s_at | Region | Numa1         | 101706 | 7  | 96075802  | 96120917  | + |
| 9121 | 1452197_at   | Region | Smc4l1        | 70099  | 3  | 68675494  | 68705145  | + |
| 9122 | 1453782_at   | Region | 3021401C12Rik | 70678  | 15 | 31290975  | 31293548  | - |
| 9123 | 1431167_at   | Region | Dgkg          | 110197 | 16 | 21240316  | 21402362  | - |
| 9124 | 1456487_at   | Region | Adcy1         | 432530 | 11 | 7072012   | 7073299   | + |
| 9125 | 1447896_s_at | Region | 2010109N14Rik | 69895  | 3  | 122299267 | 122299409 | - |
| 9126 | 1437760_at   | Region | Galnt12       | 230145 | 4  | 47007875  | 47038964  | + |
| 9127 | 1452411_at   | Region | Lrrc1         | 214345 | 9  | 77571439  | 77639884  | - |
| 9128 | 1455436_at   | Region | LOC544932     | 544932 | 13 | 51063134  | 51091231  | - |
| 9129 | 1426473_at   | Region | Dnajc9        | 108671 | 14 | 18745950  | 18750192  | - |
| 9130 | 1455133_s_at | Region | Al848100      | 226551 | 1  | 161723956 | 161783029 | - |
| 9131 | 1416556_at   | Region | Sas           | 67125  | 10 | 126800009 | 126802980 | - |
| 9132 | 1419473_a_at | Region | Cck           | 12424  | 9  | 121506265 | 121512102 | - |
| 9133 | 1455301_at   | Region | BQ952480      | 330319 | 6  | 54605656  | 54648089  | + |
| 9134 | 1424617_at   | Region | Ifi35         | 70110  | 11 | 101269568 | 101279549 | + |
| 9135 | 1423215_at   | Region | Spcs2         | 66624  | 7  | 93927764  | 93947742  | - |
| 9136 | 1416901_at   | Region | Npc2          | 67963  | 12 | 81625079  | 81641589  | - |
| 9137 | 1455620_at   | Region | None          | None   | 7  | 118447725 | 118448773 | + |
| 9138 | 1452734_at   | Region | Rnaset2       | 68195  | 17 | 6479455   | 6498737   | + |
| 9139 | 1417977_at   | Region | Eif4e3        | 66892  | 6  | 100093332 | 100134966 | - |
| 9140 | 1418271_at   | Region | Bhlhb5        | 59058  | 3  | 17384970  | 17388074  | + |
| 9141 | 1436714_at   | Region | Lpp           | 210126 | 16 | 23179019  | 23766559  | + |
| 9142 | 1435578_s_at | Region | Dab1          | 13131  | 4  | 103326495 | 103639279 | + |
| 9143 | 1419649_s_at | Region | Myo1c         | 17913  | 11 | 75377236  | 75400301  | + |
| 9144 | 1436853_a_at | Region | Snca          | 20617  | 6  | 60971674  | 61069793  | - |
| 9145 | 1421862_a_at | Region | Vamp1         | 22317  | 6  | 125872261 | 125878983 | + |
| 9146 | 1415766_at   | Region | 4930564D15Rik | 75365  | 3  | 97408693  | 97409564  | + |
| 9147 | 1428393_at   | Region | Nrn1          | 68404  | 13 | 36265477  | 36274425  | - |
| 9148 | 1437393_at   | Region | Al875142      | 103885 | 11 | 107754465 | 107758035 | - |
| 9149 | 1454674_at   | Region | Fez1          | 235180 | 9  | 36770087  | 36817745  | + |
| 9150 | 1449488_at   | Region | Pitx1         | 18740  | 13 | 54441612  | 54447983  | - |
| 9151 | 1436509_at   | Region | 2410014A08Rik | 109154 | 5  | 114254717 | 114267772 | - |
| 9152 | 1457296_at   | Region | Cilp          | 214425 | 9  | 65387445  | 65402870  | + |
| 9153 | 1416830_at   | Region | 0610031J06Rik | 56700  | 3  | 88068887  | 88072495  | + |
| 9154 | 1428380_at   | Region | 0610007C21Rik | 381629 | 5  | 29507597  | 29513561  | + |
| 9155 | 1424708_at   | Region | 1110014C03Rik | 68581  | 12 | 82210494  | 82242351  | - |
| 9156 | 1427450_x_at | Region | Myo1b         | 17912  | 1  | 52050933  | 52208258  | - |
| 9157 | 1436998_at   | Region | Ankrd43       | 237761 | 11 | 53229420  | 53232920  | - |

|      |              |        |                |        |    |           |           |   |
|------|--------------|--------|----------------|--------|----|-----------|-----------|---|
| 9158 | 1457446_at   | Region | Opcml          | 330908 | 9  | 28570800  | 28821443  | + |
|      |              |        | Hist2h2aa1 /// |        |    |           |           |   |
|      |              |        | Hist1h2ad ///  |        |    |           |           |   |
|      |              |        | Hist1h2an ///  |        |    |           |           |   |
|      |              |        | Hist2h2ab ///  |        |    |           |           |   |
|      |              |        | Hist2h2ac ///  |        |    |           |           |   |
| 9159 | 1418366_at   | Region | Hist2h2aa2     | 15267  | 3  | 95727548  | 95728125  | - |
| 9160 | 1448569_at   | Region | Cd8b1          | 12526  | 6  | 71654715  | 71669354  | + |
| 9161 | 1416246_a_at | Region | Coro1a         | 12721  | 7  | 120749505 | 120754485 | - |
| 9162 | 1417579_x_at | Region | Gmppa          | 69080  | 1  | 75726707  | 75733896  | + |
| 9163 | 1416724_x_at | Region | Tcf4           | 21413  | 18 | 69575005  | 69915006  | + |
| 9164 | 1449372_at   | Region | Dnajc3         | 19107  | 14 | 113495773 | 113540797 | + |
| 9165 | 1434096_at   | Region | Slc4a4         | 54403  | 5  | 88232301  | 88532904  | + |
| 9166 | 1435895_at   | Region | LOC547272      | 547272 | 16 | 5774751   | 5788961   | - |
| 9167 | 1419514_at   | Region | Pitx1          | 18740  | 13 | 54441612  | 54447983  | - |
| 9168 | 1418300_a_at | Region | Mknk2          | 17347  | 10 | 80797130  | 80803778  | - |
| 9169 | 1424026_s_at | Region | BC013529       | 215751 | 10 | 7633427   | 7646395   | - |
| 9170 | 1436444_at   | Region | 6030405A18     | 329641 | 3  | 54531407  | 54550223  | - |
| 9171 | 1457311_at   | Region | Camk2a         | 12322  | 18 | 61150958  | 61213470  | + |
| 9172 | 1425458_a_at | Region | Grb10          | 14783  | 11 | 11828255  | 11865408  | - |
| 9173 | 1438940_x_at | Region | Hmgn1          | 15312  | 16 | 95558992  | 95565130  | - |
| 9174 | 1452545_a_at | Region | Itgb1          | 16412  | 8  | 3634      | 31325     | + |
| 9175 | 1434440_at   | Region | Gnai1          | 14677  | 5  | 16685204  | 16687252  | - |
| 9176 | 1449289_a_at | Region | B2m            | 12010  | 2  | 121661540 | 121666935 | + |
| 9177 | 1416926_at   | Region | Trp53inp1      | 60599  | 4  | 11083406  | 11101342  | + |
| 9178 | 1436493_at   | Region | BB181834       | 381418 | 2  | 124661366 | 124661696 | + |
| 9179 | 1429264_at   | Region | C030044B11Rik  | 68128  | 13 | 48566948  | 48569375  | + |
| 9180 | 1417312_at   | Region | Dkk3           | 50781  | 7  | 105969156 | 106012196 | - |
| 9181 | 1426981_at   | Region | Pcsk6          | 18553  | 7  | 59746360  | 59934610  | + |
| 9182 | 1424329_a_at | Region | Prrg2          | 65116  | 7  | 39130146  | 39138194  | - |
| 9183 | 1459679_s_at | Region | Myo1b          | 17912  | 1  | 52050933  | 52208258  | - |
| 9184 | 1426208_x_at | Region | Plagl1         | 22634  | 10 | 12972582  | 13011561  | + |
| 9185 | 1446953_at   | Region | None           | None   | 18 | 69855808  | 69856379  | + |
| 9186 | 1456012_x_at | Region | Rnaset2        | 68195  | 17 | 6479455   | 6498737   | + |
| 9187 | 1421970_a_at | Region | Gria2          | 14800  | 3  | 80417443  | 80531582  | - |
| 9188 | 1441320_a_at | Region | AI413194       | 100620 | 5  | 136118764 | 136120238 | - |
| 9189 | 1452050_at   | Region | Camk1d         | 227541 | 2  | 5214190   | 5631787   | - |
| 9190 | 1439066_at   | Region | Angpt1         | 11600  | 15 | 42335548  | 42587605  | - |
| 9191 | 1434935_at   | Region | Aak1           | 269774 | 6  | 87436351  | 87437290  | + |
| 9192 | 1457302_at   | Region | Slc20a2        | 20516  | 8  | 21228953  | 21324191  | + |
| 9193 | 1423854_a_at | Region | Rasl11b        | 68939  | 5  | 73024750  | 73034009  | + |
| 9194 | 1435678_at   | Region | 2610017I09Rik  | 66297  | 1  | 42942917  | 42989541  | - |
| 9195 | 1417921_at   | Region | 2610029G23Rik  | 67683  | X  | 99681140  | 99686551  | + |
| 9196 | 1445202_at   | Region | None           | None   | 5  | 130022101 | 130022810 | + |
| 9197 | 1429027_at   | Region | 0610007N19Rik  | 66835  | 15 | 32244217  | 32279632  | - |
| 9198 | 1441894_s_at | Region | Grasp          | 56149  | 15 | 101282359 | 101290906 | + |
| 9199 | 1416101_a_at | Region | Hist1h1c       | 50708  | 13 | 23218684  | 23220243  | + |
| 9200 | 1449233_at   | Region | Bhlhb8         | 17341  | 5  | 143231899 | 143236054 | + |
| 9201 | 1429123_at   | Region | Rab27a         | 11891  | 9  | 73177546  | 73230218  | + |
| 9202 | 1423172_at   | Region | Napb           | 17957  | 2  | 148151593 | 148189356 | - |
| 9203 | 1435663_at   | Region | Esr1           | 13982  | 10 | 5503826   | 5892641   | - |
| 9204 | 1425652_s_at | Region | Rbpms          | 19663  | 8  | 32589665  | 32735420  | - |
| 9205 | 1459741_x_at | Region | Ucp2           | 22228  | 7  | 94600035  | 94608691  | + |
| 9206 | 1454942_at   | Region | Niban          | 63913  | 1  | 151492935 | 151576687 | + |
| 9207 | 1432474_a_at | Region | Krtcap3        | 69815  | 5  | 29710654  | 29712135  | + |
| 9208 | 1449544_a_at | Region | Kcnh2          | 16511  | 5  | 22783486  | 22815501  | - |
| 9209 | 1449616_s_at | Region | Golga3         | 269682 | 5  | 109227485 | 109273939 | + |
| 9210 | 1453848_s_at | Region | Zbed3          | 72114  | 13 | 91509451  | 91522055  | + |
| 9211 | 1423493_a_at | Region | Nfix           | 18032  | 8  | 83974112  | 84039256  | - |
| 9212 | 1460230_at   | Region | Syn2           | 20965  | 6  | 115570293 | 115710479 | + |
| 9213 | 1418149_at   | Region | Chga           | 12652  | 12 | 97999844  | 98009898  | + |
| 9214 | 1435469_at   | Region | Qscn6l1        | 227638 | 2  | 26141292  | 26169563  | - |
| 9215 | 1453027_at   | Region | Dlgap1         | 224997 | 17 | 68195196  | 68591524  | + |

Hist1h2bc ///  
 Hist1h2be ///  
 Hist1h2bl ///  
 Hist1h2bm ///

|      |              |        |               |        |    |           |           |   |
|------|--------------|--------|---------------|--------|----|-----------|-----------|---|
| 9216 | 1452540_a_at | Region | Hist1h2bp     | 319179 | 13 | 23063618  | 23101001  | - |
| 9217 | 1453191_at   | Region | Col27a1       | 373864 | 4  | 62307017  | 62424499  | + |
| 9218 | 1440849_at   | Region | 6330417G04Rik | 108780 | 13 | 88017031  | 88018036  | - |
| 9219 | 1426974_at   | Region | 4632413K17Rik | 216440 | 10 | 126828369 | 126853844 | - |
| 9220 | 1450930_at   | Region | Hpca          | 15444  | 4  | 128138688 | 128145871 | - |
| 9221 | 1423746_at   | Region | Txndc5        | 105245 | 13 | 38041006  | 38069191  | - |
| 9222 | 1460594_a_at | Region | Gmppa         | 69080  | 1  | 75726707  | 75733896  | + |
| 9223 | 1440739_at   | Region | Vegfc         | 22341  | 8  | 53042643  | 53151107  | + |
| 9224 | 1450486_a_at | Region | Oprl1         | 18389  | 2  | 181432000 | 181437928 | + |
| 9225 | 1450372_a_at | Region | Rpl18         | 19899  | 6  | 129003525 | 129004136 | + |
| 9226 | 1439143_at   | Region | 9.33E+12      | 328399 | 14 | 45989622  | 45990176  | - |
| 9227 | 1441779_at   | Region | 9530006C21Rik | 77393  | 8  | 32733763  | 32734210  | - |
| 9228 | 1438954_x_at | Region | None          | None   | X  | 158000068 | 158000375 | + |
| 9229 | 1427176_s_at | Region | AI428936      | 233066 | 7  | 25727444  | 25731659  | + |
| 9230 | 1455893_at   | Region | 2610028F08Rik | 239405 | 15 | 42929665  | 43116666  | - |
| 9231 | 1450634_at   | Region | Atp6v1a1      | 11964  | 16 | 42970115  | 43022327  | + |
| 9232 | 1416762_at   | Region | S100a10       | 20194  | 3  | 93272307  | 93281786  | + |
| 9233 | 1439701_at   | Region | 9330121K16Rik | 320227 | 8  | 54058787  | 54059453  | + |
| 9234 | 1436514_at   | Region | Gpc4          | 14735  | X  | 46573716  | 46686048  | - |
| 9235 | 1443119_at   | Region | Grm7          | 108073 | 6  | 112124756 | 112125436 | + |
| 9236 | 1418619_at   | Region | Icam5         | 15898  | 9  | 20914650  | 20921595  | + |
| 9237 | 1460186_at   | Region | MGI:1914262   | 107358 | 19 | 40758164  | 40808343  | - |
| 9238 | 1422441_x_at | Region | Cdk4          | 12567  | 10 | 126796334 | 126800114 | + |
| 9239 | 1433428_x_at | Region | Tgm2          | 21817  | 2  | 157573374 | 157603361 | - |
| 9240 | 1431829_a_at | Region | Rgl3          | 71746  | 9  | 21861231  | 21879362  | - |
| 9241 | 1455762_at   | Region | C330002I19Rik | 77480  | 12 | 21526422  | 21612277  | + |
| 9242 | 1435033_at   | Region | 9330140K16Rik | 226970 | 1  | 35071064  | 35082096  | + |
| 9243 | 1455137_at   | Region | Rapgef5       | 217944 | 12 | 113453236 | 113521583 | + |
| 9244 | 1454782_at   | Region | Bai3          | 210933 | 1  | 25316949  | 26075533  | - |
| 9245 | 1416603_at   | Region | Rpl22         | 19934  | 4  | 150818238 | 150826433 | + |
| 9246 | 1416816_at   | Region | Nek7          | 59125  | 1  | 138334093 | 138469075 | - |
| 9247 | 1450138_a_at | Region | Serpib6a      | 20719  | 13 | 33449537  | 33467606  | - |
| 9248 | 1429219_at   | Region | 1200009F10Rik | 67454  | 10 | 91054397  | 91073933  | + |
| 9249 | 1433919_at   | Region | Asb4          | 65255  | 6  | 5363349   | 5405778   | + |
| 9250 | 1426162_a_at | Region | Rpl7          | 19989  | 1  | 16284751  | 16287861  | - |
| 9251 | 1420965_a_at | Region | Enc1          | 13803  | 13 | 93429732  | 93441676  | + |
| 9252 | 1418579_at   | Region | Cetn2         | 26370  | X  | 67574220  | 67578999  | - |
| 9253 | 1452217_at   | Region | Ahnak         | 66395  | 19 | 8185831   | 8273459   | + |
| 9254 | 1435043_at   | Region | Plcb1         | 18795  | 2  | 134734571 | 134986275 | + |
| 9255 | 1437161_x_at | Region | Rbpms         | 19663  | 8  | 32589665  | 32735420  | - |
| 9256 | 1423091_a_at | Region | Gpm6b         | 14758  | X  | 159838377 | 159988393 | + |
| 9257 | 1429287_a_at | Region | Prl           | 19109  | 13 | 26537198  | 26544804  | + |
| 9258 | 1418507_s_at | Region | D130043N08Rik | 103250 | 10 | 95388033  | 95392041  | - |
| 9259 | 1456283_at   | Region | Neto1         | 246317 | 18 | 86565134  | 86671455  | + |
| 9260 | 1415987_at   | Region | Hdlbp         | 110611 | 1  | 93233431  | 93306299  | - |
| 9261 | 1434904_at   | Region | Hivep2        | 15273  | 10 | 14029087  | 14051962  | + |
| 9262 | 1425175_at   | Region | C1ql3         | 227580 | 2  | 12919466  | 12927756  | - |
| 9263 | 1418195_at   | Region | Galnt10       | 171212 | 11 | 57371071  | 57513130  | + |
| 9264 | 1437363_at   | Region | Homer1        | 26556  | 13 | 89489518  | 89588558  | + |
| 9265 | 1422495_a_at | Region | Hmgn1         | 15312  | 16 | 95558992  | 95565130  | - |
| 9266 | 1416836_at   | Region | Lrp10         | 65107  | 14 | 48981556  | 48987703  | + |
| 9267 | 1454757_s_at | Region | D12Ertd647e   | 52668  | 12 | 98879691  | 98885687  | + |
| 9268 | 1439030_at   | Region | Gmppb         | 331026 | 9  | 108117296 | 108119688 | + |
| 9269 | 1416918_at   | Region | Dlgh3         | 53310  | X  | 95369108  | 95419769  | + |
| 9270 | 1429359_s_at | Region | Rbpms         | 19663  | 8  | 32589665  | 32735420  | - |
| 9271 | 1418093_a_at | Region | Egf           | 13645  | 3  | 128610449 | 128688187 | - |
| 9272 | 1434295_at   | Region | Rasgrp1       | 19419  | 2  | 116793841 | 116856725 | - |
| 9273 | 1431012_a_at | Region | Peci          | 23986  | 13 | 34509925  | 34526292  | - |
| 9274 | 1426552_a_at | Region | Bcl11a        | 14025  | 11 | 23972907  | 24067984  | + |
| 9275 | 1456885_at   | Region | ---           | 435258 | 11 | 53301378  | 53302447  | + |
| 9276 | 1439750_at   | Region | None          | None   | 6  | 47504699  | 47505151  | + |

|      |              |        |               |        |    |           |           |   |
|------|--------------|--------|---------------|--------|----|-----------|-----------|---|
| 9277 | 1435971_at   | Region | Rims3         | 242662 | 4  | 119900313 | 119914004 | + |
| 9278 | 1436141_at   | Region | 2610510L01Rik | 67178  | 11 | 4599465   | 4632453   | + |
| 9279 | 1450533_a_at | Region | Plagl1        | 22634  | 10 | 12972582  | 13011561  | + |
| 9280 | 1447057_at   | Region | None          | None   | 13 | 89596861  | 89597390  | + |
| 9281 | 1437060_at   | Region | Olfm4         | 380924 | 14 | 74375875  | 74377189  | + |
| 9282 | 1456478_at   | Region | Pgm211        | 70974  | 7  | 94334296  | 94382030  | + |
| 9283 | 1417680_at   | Region | Kcna5         | 16493  | 6  | 127204164 | 127207023 | - |
| 9284 | 1451931_x_at | Region | H2-D1         | 14964  | 17 | 186801    | 249200    | - |
| 9285 | 1439777_at   | Region | B230218O03    | 329333 | 2  | 6456973   | 6458747   | - |
| 9286 | 1416688_at   | Region | Snap91        | 20616  | 9  | 87108242  | 87224260  | - |
| 9287 | 1418782_at   | Region | Rxrg          | 20183  | 1  | 167533144 | 167574406 | + |
| 9288 | 1424477_at   | Region | BC019731      | 231832 | 5  | 138801292 | 138810582 | - |
| 9289 | 1433992_at   | Region | Apxl          | 110380 | X  | 146144399 | 146157734 | - |
| 9290 | 1440534_at   | Region | 6330403A02Rik | 381310 | 1  | 180390485 | 180437713 | - |
| 9291 | 1422079_at   | Region | Prkch         | 18755  | 12 | 70432855  | 70625999  | + |
| 9292 | 1417820_at   | Region | Tor1b         | 30934  | 2  | 30885164  | 30890432  | + |
| 9293 | 1435851_at   | Region | Lgi1          | 56839  | 19 | 37608585  | 37652742  | + |
| 9294 | 1416059_at   | Region | Sec23b        | 27054  | 2  | 144013213 | 144047679 | + |
| 9295 | 1456389_at   | Region | 9130203F04Rik | 319891 | 2  | 44915677  | 44918442  | - |
| 9296 | 1442595_at   | Region | None          | None   | 7  | 78434484  | 78435148  | + |
| 9297 | 1417524_at   | Region | Cnih2         | 12794  | 19 | 4881661   | 4887208   | - |
| 9298 | 1455956_x_at | Region | Ccnd2         | 12444  | 6  | 127802641 | 127824339 | - |
| 9299 | 1453152_at   | Region | Mamdc2        | 71738  | 19 | 22540521  | 22686490  | - |
| 9300 | 1439333_at   | Region | Kcnv1         | 67498  | 15 | 45052998  | 45061646  | - |
| 9301 | 1455858_x_at | Region | Pomc1         | 18976  | 12 | 3107167   | 3112834   | + |
| 9302 | 1428118_at   | Region | Lrrn6a        | 235402 | 9  | 56731964  | 56798742  | - |
| 9303 | 1423110_at   | Region | Col1a2        | 12843  | 6  | 4458646   | 4493615   | + |
| 9304 | 1433972_at   | Region | Camta1        | 100072 | 4  | 149553741 | 150114842 | - |
| 9305 | 1427294_a_at | Region | 1810073N04Rik | 72055  | 11 | 119925064 | 119972367 | - |
| 9306 | 1433986_at   | Region | BC024659      | 108934 | 13 | 40807525  | 40834510  | + |
| 9307 | 1430301_at   | Region | Stxbp5        | 78808  | 10 | 9633720   | 9718785   | - |
| 9308 | 1450683_at   | Region | Tagln3        | 56370  | 16 | 44595436  | 44609155  | - |
| 9309 | 1435083_at   | Region | Ctxn          | 330695 | 8  | 3612618   | 3614168   | - |
| 9310 | 1427470_s_at | Region | Napb          | 17957  | 2  | 148151593 | 148189356 | - |
| 9311 | 1421739_a_at | Region | Matk          | 17179  | 10 | 81393675  | 81399111  | + |
| 9312 | 1427436_at   | Region | Six2          | 20472  | 17 | 83512185  | 83516164  | - |
| 9313 | 1418854_at   | Region | Birc2         | 11797  | 9  | 1250      | 8691      | + |
| 9314 | 1416956_at   | Region | Kcnab2        | 16498  | 4  | 150883106 | 150969841 | - |
| 9315 | 1426774_at   | Region | Parp12        | 243771 | 6  | 39222967  | 39254680  | - |
| 9316 | 1415997_at   | Region | Txnip         | 56338  | 3  | 96045794  | 96049702  | + |
| 9317 | 1442927_at   | Region | Ptk2b         | 19229  | 14 | 60680682  | 60808472  | - |
| 9318 | 1450850_at   | Region | Vil2          | 22350  | 17 | 6239016   | 6283286   | - |
| 9319 | 1426255_at   | Region | Nefl          | 18039  | 14 | 62612329  | 62616190  | + |
| 9320 | 1417420_at   | Region | Ccnd1         | 12443  | 7  | 139319781 | 139352397 | - |
| 9321 | 1456684_at   | Region | B230382K22Rik | 239408 | 15 | 43812307  | 43815641  | - |
| 9322 | 1418995_at   | Region | Neurod2       | 18013  | 11 | 98147677  | 98150732  | - |
| 9323 | 1427045_at   | Region | Synpo         | 104027 | 18 | 60821152  | 60821932  | - |
| 9324 | 1454660_at   | Region | 1100001E04Rik | 75404  | X  | 43991246  | 44021037  | + |
| 9325 | 1416927_at   | Region | Trp5inp1      | 60599  | 4  | 11083406  | 11101342  | + |
| 9326 | 1449106_at   | Region | Gpx3          | 14778  | 11 | 54655791  | 54663218  | + |
| 9327 | 1427982_s_at | Region | Syne2         | 319565 | 12 | 72696171  | 72966517  | + |
| 9328 | 1427280_at   | Region | Scn2a1        | 110876 | 2  | 65619938  | 65621824  | + |
| 9329 | 1424235_at   | Region | Ormdl2        | 66844  | 10 | 128554992 | 128558684 | - |
| 9330 | 1430396_at   | Region | 5730403I07Rik | 70487  | 9  | 77505709  | 77539876  | - |
| 9331 | 1416776_at   | Region | Crym          | 12971  | 7  | 114061951 | 114077555 | - |
| 9332 | 1420820_at   | Region | 2900073G15Rik | 67268  | 17 | 68765368  | 68773934  | - |
| 9333 | 1448946_at   | Region | Kif3c         | 16570  | 12 | 148       | 2122      | + |
| 9334 | 1454959_s_at | Region | Gnai1         | 14677  | 5  | 16685204  | 16687252  | - |
| 9335 | 1421358_at   | Region | H2-M3         | 14991  | 17 | 35031325  | 35034815  | + |
| 9336 | 1433897_at   | Region | A1597468      | 103266 | 10 | 85010116  | 85012295  | + |
| 9337 | 1426938_at   | Region | Nova1         | 18134  | 12 | 43448264  | 43449196  | - |
| 9338 | 1435519_at   | Region | Rap1b         | 215449 | 10 | 117505589 | 117536966 | - |
| 9339 | 1438059_at   | Region | None          | None   | 18 | 57694011  | 57694710  | + |
| 9340 | 1416543_at   | Region | Nfe2l2        | 18024  | 2  | 75373265  | 75402331  | - |
| 9341 | 1418397_at   | Region | Zfp275        | 27081  | X  | 68003290  | 68019619  | + |

|      |              |        |               |        |    |           |           |   |
|------|--------------|--------|---------------|--------|----|-----------|-----------|---|
| 9342 | 1423756_s_at | Region | Igfbp4        | 16010  | 11 | 98862347  | 98873733  | + |
| 9343 | 1441815_at   | Region | AI851453      | 106953 | 18 | 86675269  | 86675638  | + |
| 9344 | 1439568_at   | Region | MGI:2149712   | 268527 | 12 | 16037980  | 16123596  | - |
| 9345 | 1422692_at   | Region | Rpo2tc1       | 20024  | 15 | 11792969  | 11807128  | - |
| 9346 | 1452304_a_at | Region | Arhgef5       | 54324  | 6  | 43427204  | 43455561  | + |
| 9347 | 1449799_s_at | Region | Pkp2          | 67451  | 16 | 14981080  | 15040447  | + |
| 9348 | 1449024_a_at | Region | Hexa          | 15211  | 9  | 59656332  | 59681866  | + |
| 9349 | 1429518_at   | Region | Faim2         | 72393  | 15 | 99556986  | 99584882  | - |
| 9350 | 1416493_at   | Region | Ddost         | 13200  | 4  | 137185999 | 137193872 | + |
| 9351 | 1449167_at   | Region | Epb4.114a     | 13824  | 18 | 34019983  | 34229156  | - |
| 9352 | 1418896_a_at | Region | Rpn2          | 20014  | 2  | 156736067 | 156783287 | + |
| 9353 | 1423090_x_at | Region | Sec61g        | 20335  | 11 | 16396431  | 16402946  | - |
| 9354 | 1427095_at   | Region | Cdcp1         | 109332 | 9  | 123198536 | 123233772 | - |
| 9355 | 1423689_a_at | Region | Gpsm1         | 67839  | 2  | 26247702  | 26280397  | + |
| 9356 | 1422600_at   | Region | Rasgrf1       | 19417  | 9  | 89795814  | 89912965  | + |
| 9357 | 1428379_at   | Region | Slc17a6       | 140919 | 7  | 45791145  | 45840421  | + |
| 9358 | 1442116_at   | Region | Gm1012        | 381413 | 2  | 117790958 | 117887160 | - |
| 9359 | 1428209_at   | Region | Bex4          | 406217 | X  | 129683982 | 129685380 | + |
| 9360 | 1423035_s_at | Region | Txn15         | 52700  | 11 | 71933212  | 71936145  | + |
| 9361 | 1425942_a_at | Region | Gpm6b         | 14758  | X  | 159838377 | 159988393 | + |
| 9362 | 1450925_a_at | Region | Rps271        | 67941  | 9  | 67073432  | 67076878  | + |
| 9363 | 1455272_at   | Region | Grm5          | 108071 | 7  | 81779037  | 82108756  | + |
| 9364 | 1436087_at   | Region | Dpp10         | 269109 | 1  | 123096743 | 123812573 | - |
| 9365 | 1434725_at   | Region | 4921521N14Rik | 207798 | 16 | 42863685  | 42899689  | - |
| 9366 | 1450388_s_at | Region | Twsg1 ///     |        |    |           |           |   |
| 9366 | 1450388_s_at | Region | 1810013J15Rik | 65960  | 17 | 63632504  | 63660568  | - |
| 9367 | 1436363_a_at | Region | Nfix          | 18032  | 8  | 83974112  | 84039256  | - |
| 9368 | 1444767_at   | Region | Gnas          | 14683  | 2  | 173709228 | 173771651 | + |
| 9369 | 1433567_at   | Region | Gmps          | 229363 | 3  | 63642160  | 63687698  | + |
| 9370 | 1437921_x_at | Region | Zfp516        | 329003 | 18 | 83123821  | 83170925  | + |
| 9371 | 1460456_at   | Region | 2010316F05Rik | 67939  | 11 | 29407845  | 29409823  | - |
| 9372 | 1433800_a_at | Region | Pomc1         | 18976  | 12 | 3107167   | 3112834   | + |
| 9373 | 1428331_at   | Region | 2210016F16Rik | 70153  | 13 | 57013547  | 57017878  | - |
| 9374 | 1434986_a_at | Region | Sec61a1       | 53421  | 6  | 88938985  | 88954178  | - |
| 9375 | 1434998_at   | Region | Iqgap1        | 29875  | 7  | 74515481  | 74605994  | - |
| 9376 | 1451310_a_at | Region | Ctsl          | 13039  | 13 | 61752983  | 61760075  | - |
| 9377 | 1440962_at   | Region | Slc8a3        | 110893 | 12 | 78060702  | 78194436  | - |
| 9378 | 1457092_at   | Region | C630007B19Rik | 320265 | 6  | 96574976  | 97120216  | + |
| 9379 | 1435038_s_at | Region | Aak1          | 269774 | 6  | 87425235  | 87425928  | + |
| 9380 | 1449842_at   | Region | 1810059G22Rik | 67706  | 19 | 7969076   | 7970989   | - |
| 9381 | 1436357_at   | Region | None          | None   | 11 | 84598872  | 84599730  | + |
| 9382 | 1440587_at   | Region | None          | None   | 16 | 42198886  | 42199577  | + |
| 9383 | 1423186_at   | Region | Tiam2         | 24001  | 17 | 3358883   | 3481083   | + |
| 9384 | 1450520_at   | Region | Cacng3        | 54376  | 7  | 116549752 | 116646824 | + |
| 9385 | 1433985_at   | Region | Abi2          | 329165 | 1  | 60713087  | 60784447  | + |
| 9386 | 1435767_at   | Region | Scn3b         | 235281 | 9  | 40219687  | 40241396  | + |
| 9387 | 1434709_at   | Region | C130076O07Rik | 319504 | 12 | 40985533  | 41346376  | + |
| 9388 | 1419938_s_at | Region | Arhgef17      | 207212 | 7  | 94978006  | 95038415  | - |
| 9389 | 1455899_x_at | Region | Socs3         | 12702  | 11 | 117787172 | 117790255 | - |
| 9390 | 1421881_a_at | Region | Elavl2        | 15569  | 4  | 90225838  | 90375056  | - |
| 9391 | 1426534_a_at | Region | Arfgap3       | 66251  | 15 | 83348357  | 83398846  | - |
| 9392 | 1418615_at   | Region | Astn1         | 11899  | 1  | 158266071 | 158595619 | + |
| 9393 | 1423488_at   | Region | Mmd           | 67468  | 11 | 90070563  | 90099660  | + |
| 9394 | 1453915_a_at | Region | Slc37a3       | 72144  | 6  | 39472104  | 39502599  | - |
| 9395 | 1449099_at   | Region | Lrba          | 80877  | 3  | 85969078  | 86527074  | + |
| 9396 | 1433434_at   | Region | AW551984      | 244810 | 9  | 39530212  | 39546940  | - |
| 9397 | 1437698_at   | Region | Myo5b         | 17919  | 18 | 74676774  | 75005998  | + |
| 9398 | 1436299_at   | Region | Gls           | 14660  | 1  | 52466745  | 52534174  | + |
| 9399 | 1447053_x_at | Region | Ssr3          | 67437  | 3  | 65053089  | 65065985  | - |
| 9400 | 1441491_at   | Region | A330068G13Rik | 414087 | 7  | 71965300  | 71965985  | - |
| 9401 | 1435385_at   | Region | MGI:2153084   | 228911 | 2  | 169394568 | 169397236 | + |
| 9402 | 1424354_at   | Region | 1110007F12Rik | 68487  | 6  | 34957408  | 34969208  | + |
| 9403 | 1438305_at   | Region | Rims1         | 116837 | 1  | 22518105  | 22662526  | - |
| 9404 | 1456741_s_at | Region | Gpm6a         | 234267 | 8  | 53936872  | 54043110  | + |
| 9405 | 1448704_s_at | Region | H47           | 109815 | 7  | 59963883  | 59973627  | + |

|      |              |        |                   |        |    |           |           |   |
|------|--------------|--------|-------------------|--------|----|-----------|-----------|---|
| 9406 | 1454800_at   | Region | MGI:2674071       | 378462 | 17 | 78107606  | 78114868  | + |
| 9407 | 1417267_s_at | Region | Fkbp11            | 66120  | 15 | 98781810  | 98785637  | - |
| 9408 | 1433788_at   | Region | None              | None   | 12 | 85736951  | 85737688  | + |
| 9409 | 1439971_at   | Region | 6330439K17Rik     | 99097  | 2  | 143927477 | 143928540 | - |
| 9410 | 1449620_s_at | Region | D16Wsu65e         | 28001  | 16 | 3956182   | 3956737   | - |
| 9411 | 1439833_at   | Region | 38598             | 24050  | 15 | 82325610  | 82342778  | + |
| 9412 | 1437643_at   | Region | Cenpj             | 219103 | 14 | 51048548  | 51064812  | - |
| 9413 | 1455340_at   | Region | D030011O10Rik     | 320560 | 6  | 149949871 | 150037421 | - |
| 9414 | 1435894_at   | Region | C030014L02        | 329906 | 4  | 101935438 | 101936351 | + |
| 9415 | 1416344_at   | Region | Lamp2             | 16784  | X  | 32940306  | 32977217  | - |
| 9416 | 1452285_a_at | Region | Eif3s5            | 66085  | 7  | 102786972 | 102794245 | + |
| 9417 | 1419146_a_at | Region | Gck               | 103988 | 11 | 5795610   | 5844386   | - |
| 9418 | 1417538_at   | Region | Slc35a1           | 24060  | 4  | 34802324  | 34826420  | - |
| 9419 | 1441706_at   | Region | Dscaml1           | 114873 | 9  | 45443056  | 45766529  | + |
| 9420 | 1451394_at   | Region | Dpp6              | 13483  | 5  | 25258284  | 26167391  | + |
| 9421 | 1418688_at   | Region | Calcr             | 12311  | 6  | 3638256   | 3717139   | - |
| 9422 | 1451577_at   | Region | Zbtb20            | 56490  | 16 | 42442156  | 42491541  | + |
| 9423 | 1436484_at   | Region | C030019I05Rik     | 320116 | 11 | 45988394  | 45992708  | + |
| 9424 | 1418472_at   | Region | Aspa              | 11484  | 11 | 73030646  | 73050292  | - |
| 9425 | 1435667_at   | Region | Rims1             | 116837 | 1  | 22518105  | 22662526  | - |
| 9426 | 1428270_at   | Region | Glt8d1            | 76485  | 14 | 29133655  | 29143945  | + |
| 9427 | 1426767_at   | Region | 3230401M21Rik     | 106618 | 17 | 23650932  | 23667660  | - |
| 9428 | 1448676_at   | Region | Camk2b            | 12323  | 11 | 5864459   | 5960535   | - |
| 9429 | 1423301_at   | Region | Copb1             | 70349  | 7  | 108071537 | 108111448 | - |
| 9430 | 1434403_at   | Region | Spred2            | 114716 | 11 | 19819235  | 19917390  | + |
| 9431 | 1433689_s_at | Region | Rps9              | 76846  | 7  | 14674548  | 14677359  | + |
| 9432 | 1417868_a_at | Region | Ctsz              | 64138  | 2  | 173852401 | 173863899 | - |
| 9433 | 1419455_at   | Region | Ii10rb            | 16155  | 16 | 90564064  | 90583487  | + |
| 9434 | 1423053_at   | Region | Arf4              | 11843  | 14 | 24734402  | 24753463  | + |
|      |              |        | 5730427N09Rik /// |        |    |           |           |   |
| 9435 | 1423132_a_at | Region | LOC433230         | 433230 | 19 | 21678941  | 21680624  | + |
| 9436 | 1423471_at   | Region | Ptbp2             | 56195  | 3  | 118493626 | 118557890 | - |
| 9437 | 1423108_at   | Region | Slc25a20          | 57279  | 9  | 108710938 | 108733881 | + |
| 9438 | 1428094_at   | Region | Lamp2             | 16784  | X  | 32940306  | 32977217  | - |
| 9439 | 1437485_at   | Region | Nos1ap            | 70729  | 1  | 170252649 | 170555484 | - |
| 9440 | 1422099_a_at | Region | Oprl1             | 18389  | 2  | 181432000 | 181437928 | + |
|      |              |        | Hist1h4h ///      |        |    |           |           |   |
|      |              |        | Hist1h4c ///      |        |    |           |           |   |
|      |              |        | Hist1h4i ///      |        |    |           |           |   |
|      |              |        | /// Hist1h4j ///  |        |    |           |           |   |
|      |              |        | Hist1h4k ///      |        |    |           |           |   |
|      |              |        | Hist1h4m ///      |        |    |           |           |   |
|      |              |        | Hist1h4a ///      |        |    |           |           |   |
| 9441 | 1422948_s_at | Region | Hist1h4b          | 319155 | 13 | 23178015  | 23178326  | - |
| 9442 | 1433885_at   | Region | LOC544963         | 544963 | 13 | 91817361  | 91882649  | - |
| 9443 | 1429786_a_at | Region | Zwint             | 52696  | 10 | 72709781  | 72729831  | + |
| 9444 | 1427974_s_at | Region | Cacna1d           | 12289  | 14 | 28175955  | 28625750  | - |
| 9445 | 1424058_at   | Region | 1190002C06Rik     | 73137  | 18 | 57571393  | 57606175  | + |
| 9446 | 1417951_at   | Region | Eno3              | 13808  | 11 | 70383454  | 70388171  | + |
| 9447 | 1426585_s_at | Region | Mapk1             | 26413  | 16 | 15754059  | 15816626  | + |
| 9448 | 1436694_s_at | Region | Neurod4           | 11923  | 10 | 130003660 | 130015733 | - |
| 9449 | 1460366_at   | Region | Eml3              | 225898 | 19 | 8126241   | 8138129   | + |
| 9450 | 1416387_at   | Region | Pip5k2c           | 117150 | 10 | 126932905 | 126947384 | - |
| 9451 | 1455785_at   | Region | Kcna1             | 16485  | 6  | 127312007 | 127316405 | - |
| 9452 | 1439048_at   | Region | 2900078E11Rik     | 72986  | 16 | 65667797  | 65668756  | - |
| 9453 | 1425285_a_at | Region | Rab27a            | 11891  | 9  | 73177546  | 73230218  | + |
| 9454 | 1450477_at   | Region | Htr2c             | 15560  | X  | 140402560 | 140637323 | + |
| 9455 | 1422747_at   | Region | Chek2             | 50883  | 5  | 109890347 | 109924463 | + |
| 9456 | 1455636_at   | Region | Lsamp             | 268890 | 16 | 40710888  | 41011281  | + |
| 9457 | 1423994_at   | Region | Kif1b             | 16561  | 4  | 147668683 | 147799980 | - |
| 9458 | 1428411_at   | Region | 1700020I14Rik     | 66602  | 2  | 119108145 | 119117748 | + |

Rps6 ///  
LOC214738 ///  
LOC216036 ///  
LOC236932 ///  
LOC434404 ///

|      |              |        |               |        |      |           |           |      |
|------|--------------|--------|---------------|--------|------|-----------|-----------|------|
| 9459 | 1416142_at   | Region | LOC545640     | 20104  | 4    | 85840854  | 85843549  | -    |
| 9460 | 1456245_x_at | Region | Vamp3         | 22319  | 4    | 149539667 | 149550315 | -    |
| 9461 | 1459717_at   | Region | None          | None   | 7    | 5627536   | 5627867   | +    |
| 9462 | 1419163_s_at | Region | Dnajc3        | 19107  | 14   | 113495773 | 113540797 | +    |
| 9463 | 1454647_at   | Region | 5730439E10Rik | 102632 | 9    | 104041180 | 104105123 | +    |
| 9464 | 1452132_at   | Region | 0610007A15Rik | 68385  | 11   | 77904425  | 77906431  | +    |
| 9465 | 1460570_at   | Region | Pgbd5         | 209966 | 8    | 123657103 | 123671680 | -    |
| 9466 | 1436088_at   | Region | 0910001A06Rik | 223601 | 15   | 63945267  | 64076491  | -    |
| 9467 | 1447174_at   | Region | Dach1         | 13134  | 14   | 92301812  | 92643713  | -    |
| 9468 | 1427233_at   | Region | Sdccag33      | 110796 | 18   | 84180139  | 84254394  | -    |
| 9469 | 1449770_x_at | Region | D16Bwg1494e   | 224019 | 16   | 16047277  | 16049629  | +    |
| 9470 | 1416853_at   | Region | Ncdn          | 26562  | 4    | 125770868 | 125780472 | -    |
| 9471 | 1436038_a_at | Region | Dscr5         | 56176  | 16   | 93758663  | 93765231  | -    |
| 9472 | 1428572_at   | Region | Basp1         | 70350  | 15   | 25353395  | 25354075  | -    |
| 9473 | 1460458_at   | Region | Crispld2      | 78892  | 8    | 119359392 | 119408065 | +    |
| 9474 | 1452202_at   | Region | Pde2a         | 207728 | 7    | 95527997  | 95619103  | +    |
| 9475 | 1451411_at   | Region | Gprc5b        | 64297  | 7    | 112847904 | 112871012 | -    |
| 9476 | 1423648_at   | Region | Pdia6         | 71853  | 12   | 16627969  | 16646144  | +    |
| 9477 | 1425846_a_at | Region | Caln1         | 140904 | 5    | 129622542 | 130015605 | +    |
| 9478 | 1438312_s_at | Region | Ltbp3         | 16998  | 19   | 5530917   | 5547315   | +    |
| 9479 | 1456857_at   | Region | 1500011B03Rik | 66236  | NONE | NONE      | NONE      | NONE |
| 9480 | 1426416_a_at | Region | Yipf4         | 67864  | 17   | 72297116  | 72307880  | +    |
| 9481 | 1420895_at   | Region | Tgfb1         | 21812  | 4    | 47269227  | 47330846  | +    |
| 9482 | 1437448_s_at | Region | Ctnd1         | 12388  | 2    | 84298531  | 84298992  | -    |
| 9483 | 1452682_at   | Region | 4632404H22Rik | 78755  | X    | 47764230  | 47789827  | -    |
| 9484 | 1454198_a_at | Region | 5430404L10Rik | 66793  | 16   | 13626255  | 13644131  | +    |
| 9485 | 1459838_s_at | Region | Btbd11        | 74007  | 10   | 85552377  | 85552631  | +    |
| 9486 | 1433575_at   | Region | Sox4          | 20677  | 13   | 28430338  | 28433304  | -    |
| 9487 | 1455080_at   | Region | Ppp1r16b      | 228852 | 2    | 158122367 | 158219842 | +    |
| 9488 | 1433675_at   | Region | Rnu22         | 83673  | 19   | 7920687   | 7922991   | +    |
| 9489 | 1456642_x_at | Region | S100a10       | 20194  | 3    | 93272307  | 93281786  | +    |
| 9490 | 1439904_at   | Region | Fstl5         | 213262 | 3    | 75804137  | 76439608  | +    |
| 9491 | 1426442_at   | Region | Gpm6a         | 234267 | 8    | 53936872  | 54043110  | +    |
| 9492 | 1433791_at   | Region | Rab9b         | 319642 | X    | 130403090 | 130413479 | -    |
| 9493 | 1448398_s_at | Region | Rpl22         | 19934  | 4    | 150818238 | 150826433 | +    |
| 9494 | 1421093_at   | Region | Slc7a10       | 53896  | 7    | 30347870  | 30362566  | +    |
| 9495 | 1451230_a_at | Region | Wbp5          | 22381  | X    | 129790064 | 129792067 | +    |
| 9496 | 1451674_at   | Region | Slc12a5       | 57138  | 2    | 164425052 | 164456464 | +    |
| 9497 | 1425784_a_at | Region | Olfm1         | 56177  | 2    | 28137838  | 28162624  | +    |
| 9498 | 1419157_at   | Region | Sox4          | 20677  | 13   | 28430338  | 28433304  | -    |
| 9499 | 1423254_x_at | Region | Rps27l        | 67941  | 9    | 67073432  | 67076878  | +    |
| 9500 | 1435218_at   | Region | Rasgef1a      | 70727  | 6    | 118498951 | 118523137 | +    |
| 9501 | 1422662_at   | Region | Lgals8        | 56048  | 13   | 12479155  | 12500727  | -    |
| 9502 | 1436579_s_at | Region | Al839402      | 106263 | 16   | 91076823  | 91077826  | +    |
| 9503 | 1448441_at   | Region | Cks1b         | 54124  | 3    | 89172201  | 89175020  | -    |
| 9504 | 1437560_at   | Region | Ntrk2         | 18212  | 13   | 57448390  | 57572946  | +    |
| 9505 | 1429966_at   | Region | 3110057O12Rik | 269423 | 3    | 40321711  | 40365570  | +    |
| 9506 | 1448400_a_at | Region | Smarcd2       | 83796  | 11   | 106084275 | 106088711 | -    |
| 9507 | 1428154_s_at | Region | Ppapdc1       | 71910  | 8    | 24440828  | 24449305  | +    |
| 9508 | 1452872_at   | Region | 2900054D09Rik | 73013  | 10   | 70079259  | 70081585  | +    |
| 9509 | 1453421_at   | Region | Srr           | 27364  | 11   | 74632454  | 74651361  | -    |
| 9510 | 1435666_at   | Region | Mast3         | 234385 | 8    | 69933651  | 69934783  | -    |
| 9511 | 1448551_a_at | Region | Trim2         | 80890  | 3    | 83898180  | 83960638  | -    |
| 9512 | 1451899_x_at | Region | Gtf2ird1      | 57080  | 5    | 87703     | 186724    | -    |
| 9513 | 1438794_x_at | Region | Rps13         | 68052  | 7    | 110187198 | 110189820 | -    |
| 9514 | 1448151_at   | Region | Elavl1        | 15568  | 8    | 3643294   | 3667872   | -    |
| 9515 | 1424156_at   | Region | Rbl1          | 19650  | 2    | 156602867 | 156661488 | -    |
| 9516 | 1443960_at   | Region | Asrgl1        | 66514  | 19   | 8308266   | 8332113   | -    |
| 9517 | 1435558_at   | Region | Bai2          | 230775 | 4    | 129019181 | 129049461 | +    |
| 9518 | 1419494_a_at | Region | Tpd52         | 21985  | 3    | 78893581  | 78895590  | -    |

|      |              |        |               |        |      |           |           |      |
|------|--------------|--------|---------------|--------|------|-----------|-----------|------|
| 9519 | 1455410_at   | Region | Faim2         | 72393  | 15   | 99556986  | 99584882  | -    |
| 9520 | 1435056_x_at | Region | Pofut2        | 80294  | 10   | 77370658  | 77380047  | +    |
| 9521 | 1416038_at   | Region | AL033314      | 56463  | 6    | 28527393  | 28935815  | +    |
| 9522 | 1450843_a_at | Region | Serpinh1      | 12406  | 7    | 93433937  | 93441711  | -    |
| 9523 | 1433945_at   | Region | 5730507A09Rik | 70638  | 7    | 58642774  | 58657690  | -    |
| 9524 | 1451529_at   | Region | Sgtb          | 218544 | 13   | 100327976 | 100359638 | +    |
| 9525 | 1425582_a_at | Region | MGI:1891716   | 59308  | 3    | 136226028 | 136317669 | +    |
| 9526 | 1417869_s_at | Region | Ctsz          | 64138  | 2    | 173852401 | 173863899 | -    |
| 9527 | 1416573_at   | Region | Pofut2        | 80294  | 10   | 77370658  | 77380047  | +    |
| 9528 | 1417151_a_at | Region | Ntsr2         | 18217  | 12   | 16019829  | 16026582  | +    |
| 9529 | 1449368_at   | Region | Dcn           | 13179  | 10   | 97459372  | 97497709  | +    |
| 9530 | 1417111_at   | Region | Man1a         | 17155  | 10   | 54152456  | 54322172  | -    |
| 9531 | 1436134_at   | Region | Scn2b         | 72821  | 9    | 45118242  | 45118928  | +    |
| 9532 | 1453993_a_at | Region | Bnip2         | 12175  | 9    | 70120357  | 70139177  | +    |
| 9533 | 1454939_at   | Region | Phf201        | 239510 | 15   | 66601624  | 66648123  | +    |
| 9534 | 1427890_a_at | Region | 5730427C23Rik | 70552  | 7    | 135597131 | 135612042 | +    |
| 9535 | 1428255_at   | Region | Luc7l         | 66978  | 17   | 24046121  | 24075138  | +    |
| 9536 | 1452767_at   | Region | Rrbp1         | 81910  | 2    | 143442799 | 143468120 | -    |
| 9537 | 1436340_at   | Region | 9630041G16Rik | 100223 | 4    | 56900622  | 56901684  | -    |
| 9538 | 1417109_at   | Region | Tinagl        | 94242  | 4    | 129192832 | 129202235 | -    |
| 9539 | 1448903_at   | Region | MGI:1927947   | 93684  | 3    | 143542154 | 143569352 | +    |
| 9540 | 1439843_at   | Region | Camk4         | 12326  | 18   | 33179625  | 33409958  | +    |
| 9541 | 1418153_at   | Region | Lama1         | 16772  | 17   | 65465173  | 65590535  | +    |
| 9542 | 1425132_at   | Region | Neto1         | 246317 | 18   | 86565134  | 86671455  | +    |
| 9543 | 1423423_at   | Region | Pdia3         | 14827  | 2    | 120927809 | 120951829 | +    |
| 9544 | 1417245_at   | Region | E130016I23Rik | 58245  | 14   | 112692638 | 112719594 | +    |
| 9545 | 1437005_a_at | Region | Rpl18         | 19899  | 6    | 129003525 | 129004136 | +    |
| 9546 | 1434947_at   | Region | Kif3c         | 16570  | 12   | 148       | 2122      | +    |
| 9547 | 1446357_at   | Region | BC020402      | 407824 | 10   | 7544334   | 7544995   | -    |
| 9548 | 1453836_a_at | Region | Mgll          | 23945  | 6    | 89159883  | 89263412  | +    |
| 9549 | 1416127_a_at | Region | Dnpep         | 13437  | 1    | 75598827  | 75608568  | -    |
| 9550 | 1435604_at   | Region | Trim37        | 68729  | 11   | 86855069  | 86948674  | +    |
| 9551 | 1455628_at   | Region | 6430543G08Rik | 319794 | NONE | NONE      | NONE      | NONE |
| 9552 | 1455840_at   | Region | Rapgef5       | 217944 | 12   | 113453236 | 113521583 | +    |
| 9553 | 1435204_at   | Region | Hrmt114       | 381813 | 6    | 128377963 | 128457962 | -    |
| 9554 | 1419184_a_at | Region | Fhl2          | 14200  | 1    | 43417794  | 43458567  | -    |
| 9555 | 1449389_at   | Region | Tal1          | 21349  | 4    | 114018432 | 114030660 | +    |
| 9556 | 1422756_at   | Region | Slc32a1       | 22348  | 2    | 158068170 | 158072631 | +    |
| 9557 | 1426983_at   | Region | Fnbp1         | 14269  | 2    | 30985397  | 31074101  | -    |
| 9558 | 1424806_s_at | Region | 1110039B18Rik | 68796  | 5    | 29328591  | 29336411  | +    |
| 9559 | 1417323_at   | Region | 5430413I02Rik | 56742  | 3    | 108179585 | 108183911 | +    |
| 9560 | 1434449_at   | Region | Aqp4          | 11829  | 18   | 15581082  | 15591914  | -    |
| 9561 | 1423067_at   | Region | Cdk5rap3      | 80280  | 11   | 96728873  | 96737568  | -    |
| 9562 | 1437855_at   | Region | Mtap4         | 17758  | 9    | 109957034 | 110109905 | +    |
| 9563 | 1437143_a_at | Region | Txndc1        | 72736  | 12   | 67285315  | 67299785  | +    |
| 9564 | 1439766_x_at | Region | Vegfc         | 22341  | 8    | 53042643  | 53151107  | +    |
| 9565 | 1460408_at   | Region | Gabrg1        | 14405  | 5    | 69531953  | 69623523  | -    |
| 9566 | 1436322_a_at | Region | 2810001A02Rik | 72146  | 15   | 86264501  | 86265270  | -    |
| 9567 | 1426914_at   | Region | Marveld2      | 218518 | 13   | 96748325  | 96753403  | -    |
| 9568 | 1444286_at   | Region | None          | None   | 13   | 91068262  | 91069247  | +    |
| 9569 | 1426332_a_at | Region | Cldn3         | 12739  | 5    | 133999706 | 134000964 | +    |
| 9570 | 1425619_s_at | Region | Dsg2          | 13511  | 18   | 20773051  | 20817758  | +    |
| 9571 | 1419239_at   | Region | Zfp54         | 22712  | 17   | 19292554  | 19304447  | +    |
| 9572 | 1438428_at   | Region | Jph1          | 57339  | 1    | 17181923  | 17282257  | -    |
| 9573 | 1417954_at   | Region | Sst           | 20604  | 16   | 22673099  | 22674362  | -    |
| 9574 | 1417890_at   | Region | Pdpx          | 57028  | 15   | 78965238  | 78970803  | +    |
| 9575 | 1456632_at   | Region | Bcl11a        | 14025  | 11   | 23972907  | 24067984  | +    |
| 9576 | 1441963_at   | Region | MGI:2656976   | 241638 | 2    | 130146625 | 130156697 | -    |
| 9577 | 1423599_a_at | Region | Pdcl          | 67466  | 2    | 37282236  | 37291394  | -    |
| 9578 | 1450932_s_at | Region | Dock9         | 105445 | 14   | 116113166 | 116206323 | -    |
| 9579 | 1428260_at   | Region | Spg3a         | 73991  | 12   | 66724668  | 66796156  | +    |
| 9580 | 1422670_at   | Region | Rnd2          | 11858  | 11   | 101289425 | 101292393 | +    |
| 9581 | 1417435_at   | Region | Large         | 16795  | 8    | 71965827  | 72364115  | -    |
| 9582 | 1441778_at   | Region | Adcyap1       | 11516  | 17   | 91181801  | 91187870  | +    |
| 9583 | 1433932_x_at | Region | C030046I01Rik | 109284 | 10   | 80033312  | 80039553  | -    |



|      |              |        |               |        |    |           |           |   |
|------|--------------|--------|---------------|--------|----|-----------|-----------|---|
| 9584 | 1451583_a_at | Region | BC025076      | 216829 | 11 | 62374331  | 62392004  | + |
| 9585 | 1416034_at   | Region | Cd24a         | 12484  | 10 | 43687333  | 43692412  | + |
| 9586 | 1424852_at   | Region | Mef2c         | 17260  | 13 | 79604158  | 79763912  | + |
| 9587 | 1447837_x_at | Region | None          | None   | 17 | 43681275  | 43681498  | - |
| 9588 | 1452952_at   | Region | 9030418K01Rik | 71532  | 2  | 178139528 | 178141387 | + |
| 9589 | 1426973_at   | Region | Gpr153        | 100129 | 4  | 150766724 | 150777699 | + |
| 9590 | 1449002_at   | Region | Phlda3        | 27280  | 1  | 135612814 | 135615815 | + |
| 9591 | 1450055_at   | Region | Vsnl1         | 26950  | 12 | 10678693  | 10740412  | - |
| 9592 | 1426345_at   | Region | Prepl         | 213760 | 17 | 82893334  | 82920056  | - |
| 9593 | 1455358_at   | Region | A2bp1         | 268859 | 16 | 6740061   | 7081334   | + |
| 9594 | 1459019_at   | Region | Sprn          | 212518 | 7  | 134549625 | 134553656 | - |
| 9595 | 1440438_at   | Region | Wasf1         | 83767  | 10 | 41029716  | 41047932  | + |
| 9596 | 1450437_a_at | Region | Ncam1         | 17967  | 9  | 49555319  | 49607941  | - |
| 9597 | 1457061_at   | Region | Glcci1        | 170772 | 6  | 8234651   | 8573400   | + |
| 9598 | 1423978_at   | Region | Sbk1          | 104175 | 7  | 120322350 | 120344730 | + |
| 9599 | 1448184_at   | Region | Fkbp1a        | 14225  | 2  | 150999557 | 151018627 | + |
| 9600 | 1436443_a_at | Region | Kdelc1        | 72050  | 1  | 44402365  | 44414592  | - |
| 9601 | 1424069_at   | Region | Napg          | 108123 | 18 | 63183763  | 63228262  | + |
| 9602 | 1456119_at   | Region | Grm5          | 108071 | 7  | 81779037  | 82108756  | + |
| 9603 | 1416698_a_at | Region | Cks1b         | 54124  | 3  | 89172201  | 89175020  | - |
| 9604 | 1446670_at   | Region | Cugbp2        | 14007  | 2  | 6459141   | 6638885   | - |
| 9605 | 1423126_at   | Region | Atp1b3        | 11933  | 9  | 96231661  | 96263287  | - |
| 9606 | 1428623_at   | Region | Plxna1        | 18844  | 6  | 89754497  | 89798238  | - |
| 9607 | 1423892_at   | Region | Apbb1         | 11785  | 7  | 99670922  | 99693881  | - |
| 9608 | 1441305_at   | Region | Nedd4l        | 83814  | 18 | 65256461  | 65446324  | + |
| 9609 | 1433931_at   | Region | C030046I01Rik | 109284 | 10 | 80033312  | 80039553  | - |
| 9610 | 1452347_at   | Region | Mef2a         | 17258  | 7  | 61121784  | 61125517  | - |
| 9611 | 1417279_at   | Region | Itpr1         | 16438  | 6  | 108714663 | 109053117 | + |
| 9612 | 1448231_at   | Region | Fkbp5         | 14229  | 17 | 26200322  | 26287578  | - |
| 9613 | 1419118_at   | Region | 2900093B09Rik | 58188  | 7  | 35016170  | 35046860  | + |
| 9614 | 1434763_at   | Region | A730041O15Rik | 269717 | 5  | 135160956 | 135184148 | - |
| 9615 | 1433934_at   | Region | Sec24a        | 77371  | 11 | 51447661  | 51509426  | - |
| 9616 | 1439462_x_at | Region | 1110014C03Rik | 68581  | 12 | 82210494  | 82242351  | - |
| 9617 | 1448253_at   | Region | Glud1         | 14661  | 14 | 32447805  | 32482226  | + |
| 9618 | 1434673_at   | Region | Gpr22         | 73010  | 12 | 28281559  | 28288571  | - |
| 9619 | 1454861_at   | Region | MGI:105968    | 109658 | 4  | 128653196 | 128667753 | - |
| 9620 | 1425634_a_at | Region | Tnk1          | 83813  | 11 | 69576757  | 69584375  | - |
| 9621 | 1455269_a_at | Region | Coro1a        | 12721  | 7  | 120749505 | 120754485 | - |
| 9622 | 1417788_at   | Region | Sncg          | 20618  | 14 | 32506856  | 32511231  | - |
| 9623 | 1438934_x_at | Region | Sema4a        | 20351  | 3  | 88179823  | 88199543  | - |
|      |              |        | Krt2-8 ///    |        |    |           |           |   |
| 9624 | 1435989_x_at | Region | LOC434261     | 16691  | 15 | 102056071 | 102063643 | - |
| 9625 | 1437341_x_at | Region | Cnp1          | 12799  | 11 | 100396062 | 100402812 | + |
| 9626 | 1421074_at   | Region | Cyp7b1        | 13123  | 3  | 17402749  | 17573964  | - |
| 9627 | 1448454_at   | Region | Sfrs6         | 67996  | 2  | 162388514 | 162394090 | + |
| 9628 | 1442614_at   | Region | Il1rap        | 16180  | 16 | 25368195  | 25502925  | + |
| 9629 | 1448948_at   | Region | Rga           | 19729  | 3  | 89024719  | 89027033  | - |
| 9630 | 1416617_at   | Region | Acas2l        | 68738  | 2  | 150075047 | 150125165 | - |
| 9631 | 1455758_at   | Region | Prkcc         | 18752  | 7  | 3801      | 13486     | - |
| 9632 | 1436948_a_at | Region | 6430550H21Rik | 245386 | X  | 32718102  | 32773193  | - |
| 9633 | 1423405_at   | Region | Timp4         | 110595 | 6  | 115681210 | 115687239 | - |
| 9634 | 1445124_at   | Region | A930009L07Rik | 402733 | 15 | 72533983  | 72534757  | - |
| 9635 | 1422086_at   | Region | Tbx19         | 83993  | 1  | 165060565 | 165083707 | - |
| 9636 | 1437237_x_at | Region | Zfp110        | 65020  | 7  | 10828742  | 10844258  | + |
| 9637 | 1424885_at   | Region | A630065K24Rik | 213417 | 1  | 132155437 | 132164168 | + |
| 9638 | 1424379_at   | Region | Car11         | 12348  | 7  | 39783109  | 39787816  | + |
| 9639 | 1436329_at   | Region | Egr3          | 13655  | 14 | 64393373  | 64396085  | + |
| 9640 | 1454806_at   | Region | D12Ertd553e   | 76820  | 12 | 11632753  | 11732017  | + |
| 9641 | 1436203_a_at | Region | 1110059G02Rik | 68786  | 15 | 55640894  | 55642196  | - |
| 9642 | 1420191_s_at | Region | D16Bwg1494e   | 224019 | 16 | 16047277  | 16049629  | + |
| 9643 | 1417012_at   | Region | Sdc2          | 15529  | 15 | 32919852  | 33033850  | + |
| 9644 | 1450070_s_at | Region | Pak1          | 18479  | 7  | 91889708  | 91958070  | + |
| 9645 | 1432329_a_at | Region | Matk          | 17179  | 10 | 81393675  | 81399111  | + |
| 9646 | 1437385_at   | Region | None          | None   | 18 | 66289526  | 66290257  | - |
| 9647 | 1434576_at   | Region | Tsga14        | 83922  | 6  | 30701454  | 30741755  | - |

|      |              |        |               |        |    |           |           |   |
|------|--------------|--------|---------------|--------|----|-----------|-----------|---|
| 9648 | 1418583_at   | Region | Hint3         | 66847  | 10 | 30650948  | 30661107  | - |
| 9649 | 1439552_at   | Region | Trio          | 223435 | 15 | 27735485  | 27736133  | - |
| 9650 | 1460331_at   | Region | Tm9sf2        | 68059  | 14 | 116675627 | 116727419 | + |
| 9651 | 1424169_at   | Region | Tax1bp3       | 76281  | 11 | 72902741  | 72907704  | + |
| 9652 | 1435128_at   | Region | Baiap2        | 108100 | 11 | 119764194 | 119822580 | + |
| 9653 | 1428064_at   | Region | Centd2        | 69710  | 7  | 95491815  | 95518874  | + |
| 9654 | 1429588_at   | Region | 2810474O19Rik | 67246  | 6  | 24764793  | 24765816  | + |
| 9655 | 1448185_at   | Region | Herpod1       | 64209  | 8  | 93670672  | 93679530  | + |
| 9656 | 1425299_s_at | Region | 0610038D11Rik | 67674  | 19 | 6623999   | 6624872   | + |
| 9657 | 1427183_at   | Region | Efemp1        | 216616 | 11 | 28762563  | 28821527  | + |
| 9658 | 1438654_x_at | Region | Mmd2          | 75104  | 5  | 141570887 | 141587725 | - |
| 9659 | 1428050_a_at | Region | 0610007H07Rik | 68212  | 10 | 119786523 | 119802594 | + |
| 9660 | 1449264_at   | Region | Syt11         | 229521 | 3  | 88489566  | 88516404  | - |
| 9661 | 1438619_x_at | Region | Zdhhc14       | 224454 | 17 | 5400177   | 5659646   | + |
| 9662 | 1416981_at   | Region | Foxo1         | 56458  | 3  | 51900114  | 51981292  | + |
| 9663 | 1424719_a_at | Region | Mapt          | 17762  | 11 | 104052587 | 104149347 | + |
| 9664 | 1421176_at   | Region | Rasgrp1       | 19419  | 2  | 116793841 | 116856725 | - |
| 9665 | 1431569_a_at | Region | Lypdc1        | 72585  | 1  | 125707252 | 125747423 | - |
| 9666 | 1415935_at   | Region | Smoc2         | 64074  | 17 | 12330114  | 12456677  | + |
| 9667 | 1433759_at   | Region | Dpy19l1       | 244745 | 9  | 24306726  | 24318597  | - |
| 9668 | 1419725_at   | Region | Slc26a4       | 23985  | 12 | 28095023  | 28135173  | - |
| 9669 | 1425585_at   | Region | Tnrc11        | 59024  | X  | 95876255  | 95898632  | + |
| 9670 | 1418886_s_at | Region | ldh3b         | 170718 | 2  | 129793165 | 129798290 | - |
| 9671 | 1436238_at   | Region | Lgi3          | 213469 | 14 | 64846859  | 64854311  | + |
| 9672 | 1424670_s_at | Region | Zfyve21       | 68520  | 12 | 107295781 | 107308852 | + |
| 9673 | 1421891_at   | Region | St3gal2       | 20444  | 8  | 110217644 | 110269279 | + |
| 9674 | 1436818_a_at | Region | Msi2h         | 76626  | 11 | 88067452  | 88208048  | - |
| 9675 | 1438916_x_at | Region | 6720401G13Rik | 103012 | X  | 45083921  | 45155862  | - |
| 9676 | 1434062_at   | Region | Rabgap1l      | 29809  | 1  | 160161852 | 160697585 | - |
| 9677 | 1436426_at   | Region | 5730509K17Rik | 231214 | 5  | 42419495  | 42498023  | + |
| 9678 | 1416933_at   | Region | Por           | 18984  | 5  | 134702706 | 134748817 | + |
| 9679 | 1440286_at   | Region | Fbxl16        | 214931 | 17 | 23622414  | 23627423  | + |
| 9680 | 1418756_at   | Region | Trh           | 22044  | 6  | 92691219  | 92693046  | - |
| 9681 | 1439486_at   | Region | Kcnt1         | 227632 | 2  | 25843419  | 25848759  | + |
| 9682 | 1460203_at   | Region | ltpr1         | 16438  | 6  | 108714663 | 109053117 | + |
| 9683 | 1448357_at   | Region | Snrpg         | 68011  | 6  | 86805446  | 86812808  | + |
| 9684 | 1440859_at   | Region | Akap6         | 238161 | 12 | 49603505  | 49902998  | + |
| 9685 | 1448353_x_at | Region | Rpn1          | 103963 | 6  | 88518156  | 88540499  | + |
| 9686 | 1444139_at   | Region | Ddit4l        | 73284  | 3  | 136513537 | 136518197 | + |
| 9687 | 1426209_at   | Region | Strn4         | 97387  | 7  | 13766849  | 13791927  | + |
| 9688 | 1428660_s_at | Region | Tor3a         | 30935  | 1  | 156560153 | 156579875 | - |
| 9689 | 1435123_at   | Region | Al852640      | 380744 | 12 | 3114770   | 3191118   | - |
| 9690 | 1453248_at   | Region | 2810039B14Rik | 72665  | 15 | 75692198  | 75697504  | + |
| 9691 | 1420688_a_at | Region | Sgce          | 20392  | 6  | 4627235   | 4699984   | - |
| 9692 | 1452714_at   | Region | 1200003E16Rik | 66860  | 2  | 59467444  | 59701549  | + |
| 9693 | 1437223_s_at | Region | Xbp1          | 22433  | 11 | 5415754   | 5420659   | + |
| 9694 | 1448703_at   | Region | Lsm8          | 76522  | 6  | 18898032  | 18903464  | + |
|      |              |        | Odc1 ///      |        |    |           |           |   |
|      |              |        | LOC545783 /// |        |    |           |           |   |
| 9695 | 1438761_a_at | Region | LOC546355     | 18263  | 12 | 16906701  | 16912688  | + |
| 9696 | 1434248_at   | Region | Prkch         | 18755  | 12 | 70432855  | 70625999  | + |
| 9697 | 1428218_a_at | Region | 1600012H06Rik | 67912  | 17 | 12995900  | 12998652  | + |
| 9698 | 1424223_at   | Region | 1700020C11Rik | 67900  | 11 | 3986267   | 3990192   | - |
| 9699 | 1429185_at   | Region | 8430436L14Rik | 71560  | 3  | 62125408  | 62129257  | + |
| 9700 | 1438656_x_at | Region | Timm17b       | 21855  | X  | 6138338   | 6146592   | + |
| 9701 | 1429162_at   | Region | 1500015A07Rik | 68982  | 18 | 61955202  | 61956437  | + |
| 9702 | 1448474_at   | Region | Nek7          | 59125  | 1  | 138334093 | 138469075 | - |
| 9703 | 1439573_at   | Region | Rtn4rl2       | 269295 | 2  | 84569695  | 84584441  | - |
| 9704 | 1426221_at   | Region | Loh11cr2a     | 67776  | 9  | 38660904  | 38685943  | + |
| 9705 | 1425870_a_at | Region | Kcnp2         | 80906  | 19 | 45341106  | 45363239  | - |
| 9706 | 1429022_at   | Region | Adcyap1r1     | 11517  | 6  | 55596313  | 55643230  | + |
| 9707 | 1460700_at   | Region | Stat3         | 20848  | 11 | 100709309 | 100760491 | - |
| 9708 | 1428875_at   | Region | Golph4        | 73124  | 3  | 75606017  | 75686516  | - |
| 9709 | 1418498_at   | Region | Fgf13         | 14168  | X  | 53816864  | 53889150  | - |
| 9710 | 1418902_at   | Region | 3110023E09Rik | 68038  | 7  | 135895916 | 135942583 | - |

|      |              |        |                     |        |      |           |           |      |
|------|--------------|--------|---------------------|--------|------|-----------|-----------|------|
| 9711 | 1449267_at   | Region | 3110023E09Rik       | 68038  | 7    | 135895916 | 135942583 | -    |
| 9712 | 1417709_at   | Region | Cyp46a1             | 13116  | 12   | 103805370 | 103833223 | +    |
| 9713 | 1427277_at   | Region | Six1                | 20471  | 12   | 69888891  | 69893525  | -    |
| 9714 | 1435197_at   | Region | Pou3f3              | 18993  | 1    | 42991862  | 42993355  | +    |
| 9715 | 1455145_at   | Region | None                | None   | X    | 127127811 | 127129566 | -    |
| 9716 | 1452380_at   | Region | Epha7               | 13841  | 4    | 28997442  | 29149372  | +    |
| 9717 | 1416937_at   | Region | Gabarap             | 56486  | 11   | 69717028  | 69720604  | +    |
| 9718 | 1438665_at   | Region | Smpd3               | 58994  | 8    | 105548395 | 105633835 | -    |
| 9719 | 1417505_s_at | Region | Il11ra1 /// Il11ra2 | 16157  | 4    | 41901051  | 41908166  | +    |
| 9720 | 1417747_at   | Region | Cplx1               | 12889  | 5    | 107594772 | 107626145 | -    |
| 9721 | 1424437_s_at | Region | Abcg4               | 192663 | 9    | 44262045  | 44277099  | -    |
| 9722 | 1454886_x_at | Region | None                | None   | 12   | 67076694  | 67077367  | -    |
| 9723 | 1426339_at   | Region | Ak5                 | 229949 | 3    | 151445720 | 151481554 | -    |
| 9724 | 1417829_a_at | Region | Rab15               | 104886 | 12   | 73654549  | 73681495  | -    |
| 9725 | 1429064_at   | Region | 2900024P20Rik       | 208440 | 13   | 9260573   | 9652519   | +    |
| 9726 | 1435593_x_at | Region | Rps7                | 20115  | 12   | 25196338  | 25201165  | -    |
| 9727 | 1437360_at   | Region | Pcdh19              | 279653 | X    | 127132549 | 127233781 | -    |
| 9728 | 1429021_at   | Region | Epha4               | 13838  | 1    | 77656420  | 77802175  | -    |
| 9729 | 1451257_at   | Region | Acls6               | 216739 | 11   | 54057075  | 54114371  | +    |
| 9730 | 1422563_at   | Region | Crry                | 12946  | 1    | 194844160 | 194871942 | +    |
| 9731 | 1435626_a_at | Region | Herpud1             | 64209  | 8    | 93670672  | 93679530  | +    |
| 9732 | 1455315_at   | Region | 2410019G02Rik       | 216964 | 11   | 77233764  | 77238942  | -    |
| 9733 | 1418360_at   | Region | Zfp179              | 22671  | 11   | 61174084  | 61179528  | -    |
| 9734 | 1460181_at   | Region | Stmn3               | 20262  | 2    | 181023416 | 181031457 | -    |
| 9735 | 1419421_at   | Region | Ank1                | 11733  | 8    | 21812854  | 21905075  | +    |
| 9736 | 1438134_at   | Region | Pcdh10              | 18526  | 3    | 44837486  | 44841910  | +    |
| 9737 | 1446273_at   | Region | Csmd1               | 94109  | 8    | 15273983  | 16089202  | -    |
| 9738 | 1426903_at   | Region | Fndc3a              | 319448 | 14   | 66891442  | 67062343  | -    |
| 9739 | 1429261_at   | Region | 2210411K11Rik       | 75685  | 7    | 4030762   | 4035755   | -    |
| 9740 | 1451566_at   | Region | BC005471            | 235050 | 9    | 22167374  | 22198034  | -    |
| 9741 | 1433577_at   | Region | A730017C20Rik       | 225583 | 18   | 59287736  | 59302184  | +    |
| 9742 | 1436959_x_at | Region | Nelf                | 56876  | 2    | 24986575  | 24995042  | +    |
| 9743 | 1435835_at   | Region | LOC380718           | 380718 | 11   | 87556734  | 87591791  | +    |
| 9744 | 1436073_at   | Region | A630007B06Rik       | 213993 | 19   | 56376334  | 56399260  | -    |
| 9745 | 1448459_at   | Region | Kcnp1               | 70357  | 11   | 33524574  | 33738321  | -    |
| 9746 | 1460409_at   | Region | Cpt1a               | 12894  | 19   | 3137883   | 3174426   | +    |
| 9747 | 1416124_at   | Region | Ccnd2               | 12444  | 6    | 127802641 | 127824339 | -    |
| 9748 | 1418100_at   | Region | A030009H04Rik       | 80515  | 11   | 69066475  | 69068299  | +    |
| 9749 | 1436659_at   | Region | Dcamk1              | 13175  | 3    | 54876964  | 55171014  | +    |
| 9750 | 1428323_at   | Region | Gpd2                | 14571  | 2    | 57163836  | 57293151  | +    |
| 9751 | 1417050_at   | Region | C1qtnf4             | 67445  | 2    | 90590607  | 90595268  | +    |
| 9752 | 1451755_a_at | Region | Apobec1             | 11810  | 6    | 123242773 | 123267425 | -    |
| 9753 | 1421883_at   | Region | Elavl2              | 15569  | 4    | 90225838  | 90375056  | -    |
| 9754 | 1454808_at   | Region | Efha1               | 68514  | 14   | 52451152  | 52534134  | -    |
| 9755 | 1420827_a_at | Region | Ccng1               | 12450  | 11   | 40489722  | 40494170  | -    |
| 9756 | 1448236_at   | Region | Rdx                 | 19684  | 9    | 52120601  | 52161012  | +    |
| 9757 | 1426219_at   | Region | Scp2                | 20280  | 4    | 107002744 | 107077406 | -    |
| 9758 | 1428964_at   | Region | Slc25a18            | 71803  | 6    | 121205578 | 121226141 | +    |
| 9759 | 1426283_at   | Region | MGI:2446259         | 235106 | 9    | 28892331  | 29088826  | -    |
| 9760 | 1436744_x_at | Region | Fbxw14              | 50757  | 9    | 109317856 | 109334407 | -    |
| 9761 | 1419642_at   | Region | Purb                | 19291  | 11   | 6369560   | 6370704   | -    |
| 9762 | 1455871_s_at | Region | Tax1bp3 /// Rpl13   | 270106 | 8    | 122483697 | 122486521 | +    |
| 9763 | 1433469_at   | Region | Lrrn2               | 16980  | 1    | 132741815 | 132801419 | +    |
| 9764 | 1435543_at   | Region | Apc                 | 11789  | 18   | 34484045  | 34541630  | +    |
| 9765 | 1434851_s_at | Region | Crb3                | 224912 | 17   | 54752222  | 54755863  | +    |
| 9766 | 1429104_at   | Region | 0610025L06Rik       | 67803  | 11   | 105977345 | 105981231 | -    |
| 9767 | 1423213_at   | Region | Plxnc1              | 54712  | 10   | 94767461  | 94918749  | -    |
| 9768 | 1417706_at   | Region | Naglu               | 27419  | 11   | 100891212 | 100898739 | +    |
| 9769 | 1433757_a_at | Region | Nisch               | 64652  | 14   | 29302768  | 29323388  | -    |
| 9770 | 1450945_at   | Region | Prkca               | 18750  | 11   | 107759337 | 108165017 | -    |
| 9771 | 1448720_at   | Region | Lrrc40              | 67144  | 3    | 157046099 | 157077874 | +    |
| 9772 | 1426341_at   | Region | Slc1a3              | 20512  | 15   | 8424368   | 8500974   | -    |
| 9773 | 1434027_at   | Region | Dscr112             | 53902  | 4    | 134293565 | 134306678 | -    |
| 9774 | 1444077_at   | Region | None                | None   | NONE | NONE      | NONE      | NONE |
| 9775 | 1417419_at   | Region | Ccnd1               | 12443  | 7    | 139319781 | 139352397 | -    |

|      |              |        |               |        |    |           |           |   |
|------|--------------|--------|---------------|--------|----|-----------|-----------|---|
| 9776 | 1437071_at   | Region | Eif1ay        | 66235  | X  | 152971635 | 152987226 | + |
| 9777 | 1419137_at   | Region | Shank3        | 58234  | 15 | 89554156  | 89613132  | + |
| 9778 | 1457030_at   | Region | Mirg          | 373070 | 12 | 105220796 | 105226448 | + |
| 9779 | 1448242_at   | Region | Sec61a1       | 53421  | 6  | 88938985  | 88954178  | - |
| 9780 | 1449505_at   | Region | Kpna1         | 16646  | 16 | 34764772  | 34817569  | + |
| 9781 | 1431951_a_at | Region | Usp16         | 74112  | 16 | 86604508  | 86632967  | + |
| 9782 | 1426486_at   | Region | Ubx2          | 67812  | 1  | 128087153 | 128120583 | + |
| 9783 | 1451259_at   | Region | Smfn          | 104444 | 9  | 48485885  | 48497982  | - |
| 9784 | 1454837_at   | Region | Cln6          | 76524  | 9  | 62961291  | 62974504  | + |
| 9785 | 1420500_at   | Region | Dnajc1        | 13418  | 2  | 18259145  | 18434517  | - |
| 9786 | 1433507_a_at | Region | Hmgn2         | 15331  | 4  | 132925640 | 132928805 | - |
| 9787 | 1437744_at   | Region | Slitrk4       | 245446 | X  | 58938040  | 58945592  | - |
| 9788 | 1434685_at   | Region | D3Bwg0562e    | 229791 | 3  | 116093000 | 116134735 | - |
| 9789 | 1417663_a_at | Region | Ndr3          | 29812  | 2  | 156384314 | 156427107 | - |
| 9790 | 1453196_a_at | Region | Oasl2         | 23962  | 5  | 114006560 | 114021853 | + |
| 9791 | 1456397_at   | Region | Cdh4          | 12561  | 2  | 179497210 | 179613363 | + |
| 9792 | 1416220_at   | Region | Spcs1         | 69019  | 14 | 29131779  | 29133314  | - |
| 9793 | 1425533_a_at | Region | Stau2         | 29819  | 1  | 16527085  | 16558282  | - |
| 9794 | 1454677_at   | Region | Timp2         | 21858  | 11 | 118122157 | 118176401 | - |
| 9795 | 1423119_at   | Region | Rshl2         | 66832  | 17 | 6405302   | 6448903   | - |
| 9796 | 1427921_s_at | Region | 2310061C15Rik | 66531  | 8  | 116217815 | 116249733 | - |
| 9797 | 1451783_a_at | Region | Kifap3        | 16579  | 1  | 163697221 | 163834642 | + |
| 9798 | 1428637_at   | Region | Dyrk2         | 69181  | 10 | 118436994 | 118438441 | - |
| 9799 | 1425480_at   | Region | Cnot6l        | 231464 | 5  | 95087917  | 95179605  | - |
| 9800 | 1428253_at   | Region | Chmp2b        | 68942  | 16 | 64543222  | 64566897  | - |
| 9801 | 1418933_at   | Region | Slc1a6        | 20513  | 10 | 78895476  | 78930109  | + |
| 9802 | 1436526_at   | Region | Gnptg         | 214505 | 17 | 23040168  | 23045967  | - |
| 9803 | 1429053_at   | Region | 1110012J17Rik | 68617  | 17 | 64055405  | 64103991  | - |
| 9804 | 1437052_s_at | Region | Slc2a3        | 20527  | 6  | 123394798 | 123409491 | - |
| 9805 | 1449435_at   | Region | B4galt3       | 57370  | 1  | 171199227 | 171205734 | + |
| 9806 | 1435522_a_at | Region | 2310016E02Rik | 67695  | 5  | 29365462  | 29366669  | - |
| 9807 | 1416721_s_at | Region | Sfrs6         | 67996  | 2  | 162388514 | 162394090 | + |
| 9808 | 1416749_at   | Region | Prss11        | 56213  | 7  | 125247906 | 125297330 | + |
| 9809 | 1450907_at   | Region | Spcs2         | 66624  | 7  | 93927764  | 93947742  | - |
| 9810 | 1431056_a_at | Region | Lpl           | 16956  | 8  | 68029951  | 68056194  | + |
| 9811 | 1450193_at   | Region | Hcn1          | 15165  | 13 | 114055153 | 114429899 | + |
| 9812 | 1416091_at   | Region | Mtap4         | 17758  | 9  | 109957034 | 110109905 | + |
| 9813 | 1452956_a_at | Region | D12Ertd647e   | 52668  | 12 | 98879691  | 98885687  | + |
| 9814 | 1448552_s_at | Region | 2310028N02Rik | 66950  | 1  | 191062230 | 191089190 | + |
| 9815 | 1459695_at   | Region | None          | None   | 16 | 41902852  | 41903163  | + |
| 9816 | 1452071_at   | Region | Slc4a4        | 54403  | 5  | 88232301  | 88532904  | + |
| 9817 | 1427296_at   | Region | BC010304      | 218236 | 13 | 48477714  | 48566441  | - |
| 9818 | 1436226_at   | Region | Tceb1         | 67923  | 1  | 16827250  | 16842139  | - |
| 9819 | 1433662_s_at | Region | Timp2         | 21858  | 11 | 118122157 | 118176401 | - |
| 9820 | 1460257_a_at | Region | Mthfs         | 107885 | 9  | 89099733  | 89128768  | + |
| 9821 | 1436513_at   | Region | 3526402J09Rik | 237960 | 11 | 105744223 | 105745391 | + |
| 9822 | 1460626_at   | Region | 38606         | 52398  | 5  | 92429207  | 92510708  | + |
| 9823 | 1460592_at   | Region | Epb4.1l1      | 13821  | 2  | 155877989 | 155997768 | + |
| 9824 | 1436180_at   | Region | Dnajc5        | 13002  | 2  | 181237462 | 181269206 | + |
| 9825 | 1423973_a_at | Region | Arf3          | 11842  | 15 | 98795066  | 98820699  | - |
| 9826 | 1435826_at   | Region | Rad18         | 58186  | 6  | 113184164 | 113259954 | - |
| 9827 | 1427416_x_at | Region | Dusp7         | 235584 | 9  | 106362584 | 106369022 | + |
| 9828 | 1424986_s_at | Region | Fbxw7         | 50754  | 3  | 84695316  | 84720739  | + |
| 9829 | 1419062_at   | Region | Epb4.1l3      | 13823  | 17 | 66934864  | 67065569  | + |
| 9830 | 1422490_at   | Region | Bnip2         | 12175  | 9  | 70120357  | 70139177  | + |
| 9831 | 1452711_at   | Region | Spg3a         | 73991  | 12 | 66724668  | 66796156  | + |
| 9832 | 1450391_a_at | Region | Mgll          | 23945  | 6  | 89159883  | 89263412  | + |
| 9833 | 1421889_a_at | Region | Aplp2         | 11804  | 9  | 31068390  | 31130767  | - |
| 9834 | 1452657_at   | Region | Ap1s2         | 108012 | X  | 157508565 | 157528951 | + |
| 9835 | 1452248_at   | Region | Plekhhg5      | 269608 | 4  | 150589081 | 150607762 | + |
| 9836 | 1458324_x_at | Region | None          | None   | 6  | 93697593  | 93697780  | + |
| 9837 | 1427286_at   | Region | D11Bwg0517e   | 52897  | 11 | 118315243 | 118582135 | - |
| 9838 | 1434446_at   | Region | D630014A15Rik | 319666 | 8  | 13158142  | 13211994  | + |
| 9839 | 1423233_at   | Region | Cebpd         | 12609  | 16 | 14655589  | 14657307  | + |
| 9840 | 1455875_x_at | Region | Tm9sf2        | 68059  | 14 | 116675627 | 116727419 | + |

|      |              |        |                     |        |    |           |           |   |
|------|--------------|--------|---------------------|--------|----|-----------|-----------|---|
| 9841 | 1417391_a_at | Region | Il16<br>Rpl10 ///   | 16170  | 7  | 77499493  | 77591920  | - |
| 9842 | 1415942_at   | Region | LOC234703           | 110954 | X  | 68931512  | 68933781  | + |
| 9843 | 1427878_at   | Region | 0610010O12Rik       | 66060  | 18 | 36566148  | 36591920  | + |
| 9844 | 1445328_at   | Region | E130010M05Rik       | 319847 | 1  | 82777551  | 82781741  | - |
| 9845 | 1433868_at   | Region | None                | None   | 2  | 137800261 | 137801278 | + |
| 9846 | 1436827_at   | Region | Gm944               | 381126 | 18 | 21343840  | 21521608  | - |
| 9847 | 1451679_at   | Region | 6530401D17Rik       | 76219  | X  | 129538762 | 129579883 | + |
| 9848 | 1441382_at   | Region | None                | None   | X  | 52251384  | 52252096  | - |
| 9849 | 1429759_at   | Region | Rps6ka6             | 67071  | X  | 105788074 | 105862607 | - |
| 9850 | 1450069_a_at | Region | Cugbp2              | 14007  | 2  | 6459141   | 6638885   | - |
| 9851 | 1425336_x_at | Region | H2-K1               | 14972  | 17 | 32967247  | 32971632  | + |
| 9852 | 1456085_x_at | Region | Cd151               | 12476  | 7  | 135869384 | 135873464 | + |
| 9853 | 1435511_at   | Region | Syn2                | 20965  | 6  | 115570293 | 115710479 | + |
| 9854 | 1455754_at   | Region | Lmo3                | 109593 | 6  | 139156439 | 139373926 | - |
| 9855 | 1417116_at   | Region | Slc6a8              | 102857 | X  | 68333805  | 68343157  | + |
| 9856 | 1435190_at   | Region | Chl1                | 12661  | 6  | 103991578 | 104209457 | + |
| 9857 | 1439398_x_at | Region | Nelf                | 56876  | 2  | 24986575  | 24995042  | + |
| 9858 | 1424367_a_at | Region | Homer2              | 26557  | 7  | 75417854  | 75529582  | - |
| 9859 | 1423428_at   | Region | Ror2                | 26564  | 13 | 51672830  | 51844724  | + |
| 9860 | 1428507_at   | Region | Hdhd2               | 76987  | 18 | 77065841  | 77093117  | + |
| 9861 | 1435326_at   | Region | AW112037            | 98667  | 1  | 191515786 | 191519464 | + |
| 9862 | 1437861_s_at | Region | None                | None   | 17 | 84488716  | 84490164  | + |
| 9863 | 1459338_at   | Region | Auts2               | 319974 | 5  | 130627794 | 130728707 | - |
| 9864 | 1428203_at   | Region | C030002O17Rik       | 78533  | 11 | 42384313  | 42385400  | + |
| 9865 | 1436495_s_at | Region | Zfp260              | 26466  | 7  | 25509675  | 25522233  | + |
| 9866 | 1454852_at   | Region | Sp1                 | 20683  | 15 | 102466747 | 102493098 | + |
| 9867 | 1439957_at   | Region | Al843190            | 106944 | 18 | 67455638  | 67456124  | + |
| 9868 | 1448954_at   | Region | Nrip3               | 78593  | 7  | 103610927 | 103634416 | - |
| 9869 | 1420641_a_at | Region | Sqrdl               | 59010  | 2  | 122295852 | 122323406 | + |
| 9870 | 1449307_at   | Region | 2810427I04Rik       | 72185  | 8  | 122879960 | 122889622 | - |
| 9871 | 1453187_at   | Region | Ociad2              | 433904 | 5  | 72107568  | 72123547  | - |
| 9872 | 1439381_x_at | Region | Marveld1            | 277010 | 19 | 41691767  | 41696030  | + |
| 9873 | 1416181_at   | Region | Mesdc2              | 67943  | 7  | 77748975  | 77758250  | + |
| 9874 | 1449474_a_at | Region | Nelf                | 56876  | 2  | 24986575  | 24995042  | + |
| 9875 | 1446148_x_at | Region | C79248<br>Rpl29 /// | 96982  | 2  | 155626395 | 155627019 | - |
|      |              |        | LOC240367 ///       |        |    |           |           |   |
|      |              |        | LOC433350 ///       |        |    |           |           |   |
|      |              |        | LOC433383 ///       |        |    |           |           |   |
|      |              |        | LOC433706 ///       |        |    |           |           |   |
| 9876 | 1448846_a_at | Region | LOC433941           | 19944  | 9  | 106423093 | 106425121 | + |
| 9877 | 1455479_a_at | Region | Ube2d3              | 66105  | 3  | 134321860 | 134350243 | + |
| 9878 | 1456373_x_at | Region | Rps20               | 67427  | 4  | 3761619   | 3762746   | - |
| 9879 | 1437472_at   | Region | Unc13a              | 382018 | 8  | 70776389  | 70778131  | - |
| 9880 | 1427560_at   | Region | Six5                | 20475  | 7  | 15963564  | 15967107  | + |
| 9881 | 1427165_at   | Region | Il13ra1             | 16164  | X  | 30732693  | 30791816  | + |
| 9882 | 1428371_at   | Region | 2610507N02Rik       | 74210  | 2  | 120246668 | 120250019 | - |
| 9883 | 1417296_at   | Region | Atf1                | 11908  | 15 | 100285451 | 100318782 | + |
| 9884 | 1422907_at   | Region | Gnat2               | 14686  | 3  | 107888810 | 107897028 | + |
| 9885 | 1428268_at   | Region | Psd2                | 74002  | 18 | 36188770  | 36238339  | + |
| 9886 | 1418899_at   | Region | Ufm1                | 67890  | 3  | 53489432  | 53497992  | - |
| 9887 | 1428867_at   | Region | 4933417E01Rik       | 74463  | 7  | 16358300  | 16366004  | + |
| 9888 | 1460696_at   | Region | BC026585            | 226527 | 1  | 157359757 | 157394630 | + |
| 9889 | 1434265_s_at | Region | Ank2                | 109676 | 3  | 125805551 | 125881703 | - |
| 9890 | 1429002_at   | Region | Skiip               | 66354  | 12 | 84536947  | 84547086  | + |
| 9891 | 1422644_at   | Region | Sh3bgr              | 50795  | 16 | 95636972  | 95655833  | + |
| 9892 | 1451782_a_at | Region | Slc29a1             | 63959  | 17 | 43096564  | 43103735  | - |
| 9893 | 1429062_at   | Region | Kif16b              | 16558  | 2  | 142170469 | 142397720 | - |
| 9894 | 1450626_at   | Region | Manba               | 110173 | 3  | 134368802 | 134454538 | + |
| 9895 | 1448182_a_at | Region | Cd24a               | 12484  | 10 | 43687333  | 43692412  | + |
| 9896 | 1428186_at   | Region | Kctd6               | 71393  | 14 | 5880987   | 5890506   | + |
| 9897 | 1431076_at   | Region | 2900072M03Rik       | 72970  | 6  | 86552074  | 86553985  | + |
| 9898 | 1421840_at   | Region | Abca1               | 11303  | 4  | 52946667  | 53075771  | - |
| 9899 | 1434172_at   | Region | Cnr1                | 12801  | 4  | 34203466  | 34224064  | + |

|      |              |        |               |        |    |           |           |   |
|------|--------------|--------|---------------|--------|----|-----------|-----------|---|
| 9900 | 1451255_at   | Region | MGI:1927471   | 54135  | 7  | 26365183  | 26380612  | - |
| 9901 | 1425534_at   | Region | Stau2         | 29819  | 1  | 16527085  | 16558282  | - |
| 9902 | 1421832_at   | Region | Twsg1         | 65960  | 17 | 63632504  | 63660568  | - |
| 9903 | 1457032_at   | Region | None          | None   | 3  | 151444587 | 151445242 | - |
| 9904 | 1416361_a_at | Region | Dncic1        | 13426  | 6  | 5698564   | 6000796   | + |
| 9905 | 1451066_at   | Region | Leng4         | 77582  | 7  | 1165      | 3428      | - |
| 9906 | 1460551_at   | Region | Ran           | 19384  | 5  | 128195181 | 128199286 | + |
| 9907 | 1436578_at   | Region | A330104H05Rik | 77767  | 2  | 57970654  | 57978291  | - |
| 9908 | 1426785_s_at | Region | Mgll          | 23945  | 6  | 89159883  | 89263412  | + |
| 9909 | 1457990_at   | Region | C030032C09Rik | 77531  | 10 | 90548071  | 90943317  | + |
| 9910 | 1432016_a_at | Region | Idh3a         | 67834  | 9  | 54704020  | 54722171  | + |
| 9911 | 1452298_a_at | Region | Myo5b         | 17919  | 18 | 74676774  | 75005998  | + |
| 9912 | 1455242_at   | Region | Foxp1         | 108655 | 6  | 99395348  | 99630926  | - |
| 9913 | 1457898_at   | Region | Kcnq5         | 226922 | 1  | 22045734  | 22046447  | - |
| 9914 | 1418209_a_at | Region | Pfn2          | 18645  | 3  | 57483992  | 57489636  | - |
| 9915 | 1448200_at   | Region | Tcn2          | 21452  | 11 | 3811977   | 3826370   | - |
| 9916 | 1454613_at   | Region | Dpysl3        | 22240  | 18 | 43544269  | 43613318  | - |
| 9917 | 1438769_a_at | Region | MGI:1925112   | 77862  | 9  | 26893639  | 26901251  | + |
| 9918 | 1417288_at   | Region | Plekha2       | 83436  | 8  | 23764086  | 23824498  | - |
| 9919 | 1416718_at   | Region | Bcan          | 12032  | 3  | 87731261  | 87744094  | - |
| 9920 | 1449314_at   | Region | Zfpm2         | 22762  | 15 | 40545548  | 40999330  | + |
| 9921 | 1417283_at   | Region | Lynx1         | 23936  | 15 | 74779518  | 74784641  | - |
| 9922 | 1438193_at   | Region | Nrxn3         | 18191  | 12 | 84906378  | 85735809  | + |
|      |              |        | Trim34 ///    |        |    |           |           |   |
| 9923 | 1424857_a_at | Region | LOC434218     | 434218 | 7  | 98356814  | 98374591  | + |
| 9924 | 1429651_at   | Region | Phactr3       | 74189  | 2  | 177858975 | 178053449 | + |
| 9925 | 1432143_a_at | Region | Hbp1          | 73389  | 12 | 28501152  | 28525243  | - |
| 9926 | 1417132_at   | Region | Cdc25a        | 12530  | 9  | 109902125 | 109918909 | + |
| 9927 | 1424525_at   | Region | Grp           | 225642 | 18 | 66106724  | 66119806  | + |
| 9928 | 1434575_at   | Region | Epb4.1l1      | 13821  | 2  | 155877989 | 155997768 | + |
| 9929 | 1424100_s_at | Region | 1500001H12Rik | 57754  | 7  | 135828437 | 135831408 | - |
| 9930 | 1459881_at   | Region | MGC62475      | 237730 | 11 | 35591414  | 35592604  | - |
| 9931 | 1424395_at   | Region | Asrgl1        | 66514  | 19 | 8308266   | 8332113   | - |
| 9932 | 1418212_at   | Region | Omg           | 18377  | 11 | 79227011  | 79229678  | - |
| 9933 | 1429274_at   | Region | 2310010M24Rik | 71897  | 2  | 49719848  | 49881008  | + |
| 9934 | 1439433_a_at | Region | Slc35a2       | 22232  | X  | 6123184   | 6133345   | + |
| 9935 | 1450333_a_at | Region | Gata2         | 14461  | 6  | 88634163  | 88642525  | + |
| 9936 | 1434528_at   | Region | Aard          | 239435 | 15 | 52040354  | 52045967  | + |
| 9937 | 1455940_x_at | Region | Wdr6          | 83669  | 9  | 108621311 | 108627764 | - |
| 9938 | 1440940_at   | Region | Cacnb1        | 12295  | 11 | 97823988  | 97904149  | - |
| 9939 | 1427510_at   | Region | Gnai1         | 14677  | 5  | 16687230  | 16780697  | - |
| 9940 | 1436179_a_at | Region | Dnajc5        | 13002  | 2  | 181237462 | 181269206 | + |
| 9941 | 1420611_at   | Region | Prkacb        | 18749  | 3  | 145706130 | 145789479 | - |
| 9942 | 1437708_x_at | Region | Vamp3         | 22319  | 4  | 149539667 | 149550315 | - |
| 9943 | 1423889_at   | Region | MGC5739       | 434402 | 9  | 48512636  | 48513345  | + |
| 9944 | 1450773_at   | Region | Kcnd2         | 16508  | 6  | 21263145  | 21776841  | + |
| 9945 | 1417275_at   | Region | Mal           | 17153  | 2  | 127147083 | 127170136 | - |
| 9946 | 1448438_at   | Region | Derl2         | 116891 | 11 | 70733103  | 70744921  | - |
| 9947 | 1415912_a_at | Region | Rps13         | 68052  | 7  | 110187198 | 110189820 | - |
| 9948 | 1429361_at   | Region | Pmch          | 110312 | 10 | 88063262  | 88064562  | + |
| 9949 | 1457128_at   | Region | AL024213      | 105253 | 13 | 51834168  | 51834693  | - |
| 9950 | 1430700_a_at | Region | Pla2g7        | 27226  | 17 | 41070175  | 41113348  | + |
| 9951 | 1416531_at   | Region | Gsto1         | 14873  | 19 | 47406289  | 47416090  | + |
| 9952 | 1424420_at   | Region | Ccpg1         | 72278  | 9  | 73118338  | 73148795  | + |
| 9953 | 1451601_a_at | Region | BC011467      | 216892 | 11 | 72177296  | 72218168  | - |
| 9954 | 1434073_at   | Region | Gprasp2       | 245607 | X  | 129383995 | 129389665 | + |
| 9955 | 1418107_at   | Region | Tcea2         | 21400  | 2  | 181397266 | 181405007 | + |
| 9956 | 1424882_a_at | Region | 2510015F01Rik | 70021  | 14 | 29263072  | 29270876  | + |
| 9957 | 1454759_at   | Region | Git1          | 216963 | 11 | 77219071  | 77233433  | + |
| 9958 | 1422532_at   | Region | Xpc           | 22591  | 6  | 91938966  | 91964918  | - |
| 9959 | 1429400_at   | Region | Clcn5         | 12728  | X  | 5398413   | 5427626   | - |
| 9960 | 1436689_a_at | Region | Aldh9a1       | 56752  | 1  | 167283401 | 167301474 | + |
| 9961 | 1437066_at   | Region | 7330412A13Rik | 78143  | 16 | 42509171  | 42511979  | + |
| 9962 | 1435021_at   | Region | Gabbr3        | 14402  | 7  | 51863803  | 52099137  | + |
| 9963 | 1426626_at   | Region | Gtf2f2        | 68705  | 14 | 70239863  | 70353356  | - |

|       |              |        |                |        |      |           |           |      |
|-------|--------------|--------|----------------|--------|------|-----------|-----------|------|
| 9964  | 1416351_at   | Region | Map2k1         | 26395  | 9    | 64306481  | 64375194  | -    |
| 9965  | 1425892_a_at | Region | Pnoc           | 18155  | 14   | 59927812  | 59952527  | -    |
| 9966  | 1434503_s_at | Region | Lamp2          | 16784  | X    | 32940306  | 32977217  | -    |
| 9967  | 1417011_at   | Region | Sdc2           | 15529  | 15   | 32919852  | 33033850  | +    |
| 9968  | 1440258_at   | Region | None           | None   | 2    | 180792969 | 180795082 | -    |
| 9969  | 1438915_at   | Region | 6720401G13Rik  | 103012 | X    | 45083921  | 45155862  | -    |
| 9970  | 1447707_s_at | Region | Pde2a          | 207728 | 7    | 95527997  | 95619103  | +    |
| 9971  | 1424612_at   | Region | 9330161F08Rik  | 223473 | 15   | 34572658  | 34678755  | -    |
| 9972  | 1456854_at   | Region | Neurl          | 18011  | 19   | 46730295  | 46810735  | +    |
| 9973  | 1421280_at   | Region | Gabra1         | 14394  | 11   | 41884317  | 41935767  | -    |
| 9974  | 1417366_s_at | Region | Calm1          | 12313  | 12   | 95642228  | 95652493  | +    |
| 9975  | 1434571_at   | Region | Vps13b         | 328525 | 15   | 35918559  | 35932752  | +    |
| 9976  | 1424624_at   | Region | 2900011O08Rik  | 67254  | 16   | 12722524  | 12837150  | +    |
| 9977  | 1417179_at   | Region | Tspan5         | 56224  | 3    | 137631430 | 137793659 | +    |
| 9978  | 1458403_at   | Region | Tnik           | 69014  | 3    | 27680596  | 28087969  | +    |
| 9979  | 1450794_at   | Region | Avp            | 11998  | 2    | 130094530 | 130096394 | -    |
| 9980  | 1437089_at   | Region | 4833409A17Rik  | 74580  | 19   | 42270264  | 42297181  | -    |
| 9981  | 1455136_at   | Region | Atp1a2         | 98660  | 1    | 172203449 | 172226896 | -    |
| 9982  | 1425575_at   | Region | Epha3          | 13837  | 16   | 62549020  | 62869320  | -    |
| 9983  | 1435642_at   | Region | 9630019K15Rik  | 320111 | 17   | 215       | 3323      | +    |
| 9984  | 1456464_x_at | Region | None           | None   | NONE | NONE      | NONE      | NONE |
| 9985  | 1428936_at   | Region | Atp2b1         | 67972  | 10   | 98895589  | 99006572  | +    |
| 9986  | 1424854_at   | Region | Hist1h4i       | 319158 | 13   | 21521076  | 21521387  | -    |
| 9987  | 1431777_a_at | Region | Hmgn3          | 94353  | 9    | 83439717  | 83476376  | -    |
| 9988  | 1451544_at   | Region | Tapbpl         | 213233 | 6    | 125880885 | 125888540 | -    |
| 9989  | 1437217_at   | Region | Ankrd6         | 140577 | 4    | 33082828  | 33202298  | -    |
| 9990  | 1416900_s_at | Region | Gdf1 /// Lass1 | 14559  | 8    | 69476431  | 69485074  | +    |
| 9991  | 1451840_at   | Region | Kcnp4          | 80334  | 5    | 47153325  | 47273714  | -    |
| 9992  | 1455361_at   | Region | Dgkb           | 217480 | 12   | 34483693  | 34776186  | +    |
| 9993  | 1429589_at   | Region | 6330404F12Rik  | 70758  | 2    | 22653645  | 22655680  | +    |
| 9994  | 1455605_at   | Region | D5Bwg0860e     | 52822  | 5    | 87850046  | 87908952  | +    |
| 9995  | 1455447_at   | Region | D430019H16Rik  | 268595 | 12   | 100938471 | 100940569 | +    |
| 9996  | 1422186_s_at | Region | Dia1           | 109754 | 15   | 83204176  | 83222883  | -    |
| 9997  | 1428663_at   | Region | 5133401H06Rik  | 71305  | 3    | 130248843 | 130250098 | -    |
| 9998  | 1417038_at   | Region | 38604          | 53860  | 11   | 117152813 | 117183400 | +    |
| 9999  | 1440742_at   | Region | Epc1           | 13831  | 18   | 6478658   | 6558794   | -    |
| 10000 | 1447825_x_at | Region | Pcdh8          | 18530  | 14   | 74120840  | 74125280  | -    |
| 10001 | 1460239_at   | Region | Tspan13        | 66109  | 12   | 32620734  | 32648498  | -    |
| 10002 | 1450121_at   | Region | Scn1a          | 20265  | 2    | 66128285  | 66206577  | -    |
| 10003 | 1431339_a_at | Region | Efh2           | 27984  | 4    | 140739403 | 140756181 | -    |
| 10004 | 1429549_at   | Region | Col27a1        | 373864 | 4    | 62307017  | 62424499  | +    |
| 10005 | 1416069_at   | Region | Pfcp           | 56421  | 13   | 6476970   | 6563786   | -    |
| 10006 | 1417774_at   | Region | Nans           | 94181  | 4    | 46405251  | 46419360  | +    |
| 10007 | 1423062_at   | Region | Igfbp3         | 16009  | 11   | 7103173   | 7108623   | -    |
| 10008 | 1422789_at   | Region | Aldh1a2        | 19378  | 9    | 71359672  | 71440085  | +    |
| 10009 | 1421606_a_at | Region | Sult4a1        | 29859  | 15   | 84124696  | 84154353  | -    |
| 10010 | 1435148_at   | Region | Atp1b2         | 11932  | 11   | 69325411  | 69331487  | -    |
| 10011 | 1426570_a_at | Region | Frk            | 14302  | 10   | 34545676  | 34672847  | +    |
| 10012 | 1417481_at   | Region | Ramp1          | 51801  | 1    | 91003083  | 91046721  | +    |
| 10013 | 1428347_at   | Region | Cyfip2         | 76884  | 11   | 45948917  | 46065130  | -    |
| 10014 | 1426039_a_at | Region | Alox12e        | 11685  | 11   | 70041271  | 70048176  | -    |
| 10015 | 1441662_at   | Region | None           | None   | 4    | 114065269 | 114065575 | -    |
| 10016 | 1460432_a_at | Region | Eif3s6         | 16341  | 15   | 43195901  | 43228545  | -    |
| 10017 | 1434902_at   | Region | Rnf157         | 217340 | 11   | 116157470 | 116234559 | -    |
| 10018 | 1417374_at   | Region | Tuba4          | 22145  | 1    | 75502339  | 75506618  | -    |
| 10019 | 1460006_at   | Region | Atbf1          | 11906  | 8    | 108012331 | 108254925 | +    |
| 10020 | 1436260_at   | Region | None           | None   | 1    | 154279911 | 154280514 | -    |
| 10021 | 1456538_at   | Region | Sdccag8        | 76816  | 1    | 176747373 | 176953729 | +    |
| 10022 | 1426829_at   | Region | Rxrip110       | 20184  | 13   | 53637738  | 53711331  | -    |
| 10023 | 1447800_x_at | Region | Tcn2           | 21452  | 11   | 3811977   | 3826370   | -    |
| 10024 | 1448797_at   | Region | Elk3           | 13713  | 10   | 93221365  | 93283561  | -    |
| 10025 | 1456018_at   | Region | AL022779       | 105246 | 13   | 69997814  | 70020895  | +    |
| 10026 | 1434603_at   | Region | Thrap2         | 76199  | 5    | 117691302 | 117893539 | +    |
| 10027 | 1438752_at   | Region | A230058F20Rik  | 320270 | X    | 36184309  | 36185041  | +    |
| 10028 | 1443847_x_at | Region | None           | None   | X    | 64540436  | 64540649  | +    |

|       |              |        |               |        |      |           |           |      |
|-------|--------------|--------|---------------|--------|------|-----------|-----------|------|
| 10029 | 1425927_a_at | Region | Atf5          | 107503 | 7    | 38887185  | 38891499  | -    |
| 10030 | 1457299_at   | Region | Grm4          | 268934 | 17   | 25221819  | 25222622  | -    |
| 10031 | 1460555_at   | Region | 6330500D04Rik | 193385 | 13   | 24212440  | 24213658  | +    |
| 10032 | 1445523_at   | Region | Gje1          | 118446 | 5    | 136904409 | 136913559 | -    |
| 10033 | 1458176_at   | Region | Per3          | 18628  | 4    | 149497074 | 149536951 | -    |
| 10034 | 1441233_at   | Region | None          | None   | 12   | 51914268  | 51914751  | +    |
| 10035 | 1457424_at   | Region | Eya1          | 14048  | 1    | 14348042  | 14481971  | -    |
| 10036 | 1437522_x_at | Region | Gh            | 14599  | 11   | 106121357 | 106122899 | -    |
| 10037 | 1417022_at   | Region | Slc7a3        | 11989  | X    | 95680582  | 95686713  | -    |
| 10038 | 1436450_at   | Region | None          | None   | 11   | 118310853 | 118311221 | -    |
| 10039 | 1451235_at   | Region | 1500001H12Rik | 57754  | 7    | 135828437 | 135831408 | -    |
| 10040 | 1415789_a_at | Region | BC002236      | 79560  | 11   | 44207410  | 44223282  | -    |
| 10041 | 1420718_at   | Region | Odz2          | 23964  | 11   | 35801678  | 36738275  | -    |
| 10042 | 1417191_at   | Region | Dnajb9        | 27362  | 12   | 121826595 | 121837207 | -    |
| 10043 | 1450975_at   | Region | Cacng4        | 54377  | 11   | 107555869 | 107615553 | -    |
| 10044 | 1421568_at   | Region | Kcna6         | 16494  | 6    | 127379948 | 127411808 | -    |
| 10045 | 1442021_at   | Region | Gnal          | 14680  | 18   | 67317669  | 67452049  | +    |
| 10046 | 1419722_at   | Region | Prss19        | 259277 | 7    | 37872977  | 37879728  | +    |
| 10047 | 1431393_at   | Region | 4930447C04Rik | 75801  | 12   | 69728240  | 69764946  | -    |
| 10048 | 1421969_a_at | Region | Faah          | 14073  | 4    | 114955573 | 114976807 | -    |
| 10049 | 1455056_at   | Region | Lmo7          | 380928 | 14   | 96369275  | 96463310  | +    |
| 10050 | 1424402_at   | Region | D5Bwg0860e    | 52822  | 5    | 87850046  | 87908952  | +    |
| 10051 | 1423619_at   | Region | Rasd1         | 19416  | 11   | 59688823  | 59690584  | -    |
| 10052 | 1425597_a_at | Region | Qk            | 19317  | 17   | 8850890   | 8959849   | -    |
| 10053 | 1435712_a_at | Region | Rps18         | 20084  | 17   | 31655742  | 31659385  | -    |
| 10054 | 1444028_s_at | Region | Dock9         | 105445 | 14   | 116113166 | 116206323 | -    |
| 10055 | 1438671_at   | Region | Ppp2r2c       | 269643 | 5    | 35375082  | 35461590  | +    |
| 10056 | 1415907_at   | Region | Ccnd3         | 12445  | 17   | 45112008  | 45118149  | +    |
| 10057 | 1437992_x_at | Region | Gja1          | 14609  | 10   | 56627159  | 56640230  | +    |
| 10058 | 1448910_at   | Region | Pecr          | 111175 | 1    | 72555295  | 72582008  | -    |
| 10059 | 1457867_at   | Region | Sgpp2         | 433323 | 1    | 78598998  | 78708934  | +    |
| 10060 | 1436182_at   | Region | Satb1         | 20230  | 17   | 49274277  | 49367498  | -    |
| 10061 | 1447551_x_at | Region | Lphn3         | 319387 | 5    | 80275281  | 81049432  | +    |
| 10062 | 1433585_at   | Region | Tnpo1         | 238799 | 13   | 95031172  | 95114281  | -    |
| 10063 | 1429111_at   | Region | Tln2          | 70549  | 9    | 67349709  | 67668766  | -    |
| 10064 | 1424741_s_at | Region | Creb3         | 12913  | 4    | 43478591  | 43482789  | +    |
| 10065 | 1424556_at   | Region | Pycr1         | 209027 | 11   | 120460517 | 120464797 | -    |
| 10066 | 1431826_a_at | Region | Brsk2         | 75770  | 7    | 136362546 | 136417039 | +    |
| 10067 | 1426519_at   | Region | P4ha1         | 18451  | 10   | 59286782  | 59335753  | +    |
| 10068 | 1417131_at   | Region | Cdc25a        | 12530  | 9    | 109902125 | 109918909 | +    |
| 10069 | 1419979_s_at | Region | Creb3         | 12913  | 4    | 43478591  | 43482789  | +    |
| 10070 | 1439412_at   | Region | Arpp21        | 19050  | NONE | NONE      | NONE      | NONE |
| 10071 | 1420505_a_at | Region | Stxbp1        | 20910  | 2    | 32720124  | 32779288  | -    |
| 10072 | 1417028_a_at | Region | Trim2         | 80890  | 3    | 83898180  | 83960638  | -    |
| 10073 | 1424530_at   | Region | Sec14l2       | 67815  | 11   | 3991826   | 4013516   | -    |
| 10074 | 1438559_x_at | Region | 1110028E10Rik | 68682  | 9    | 21224117  | 21241293  | +    |
| 10075 | 1438068_at   | Region | None          | None   | 5    | 107441765 | 107442579 | -    |
| 10076 | 1415971_at   | Region | Marcks        | 17118  | 10   | 37207003  | 37211096  | -    |
| 10077 | 1422456_at   | Region | Nsf           | 18195  | 11   | 103642871 | 103775145 | -    |
| 10078 | 1435580_at   | Region | C230081A13Rik | 244895 | 9    | 56336855  | 56527185  | -    |
| 10079 | 1434292_at   | Region | E130013N09Rik | 99358  | NONE | NONE      | NONE      | NONE |
| 10080 | 1437977_at   | Region | 2410002O22Rik | 66975  | 13   | 100361503 | 100396609 | -    |
| 10081 | 1448342_at   | Region | Mapk10        | 26414  | 5    | 101946583 | 102247027 | -    |
| 10082 | 1423544_at   | Region | Ptpn5         | 19259  | 7    | 41163785  | 41219667  | -    |
| 10083 | 1454796_at   | Region | D5Ertd40e     | 231630 | 5    | 112846457 | 112851320 | +    |
| 10084 | 1450696_at   | Region | Psmb9         | 16912  | 17   | 31887730  | 31892961  | -    |
| 10085 | 1455735_at   | Region | Ap1s3         | 252903 | 1    | 79944670  | 80009757  | -    |
| 10086 | 1435462_at   | Region | LOC433022     | 433022 | 16   | 44845024  | 44847514  | -    |
| 10087 | 1426606_at   | Region | Crtac1        | 72832  | 19   | 41827441  | 41976053  | -    |
| 10088 | 1433551_at   | Region | AI427515      | 270097 | 8    | 113506193 | 113688506 | +    |
| 10089 | 1417827_at   | Region | Ngly1         | 59007  | 14   | 14745876  | 14808542  | +    |
| 10090 | 1450164_at   | Region | Ascl1         | 17172  | 10   | 87463685  | 87466044  | -    |
| 10091 | 1416064_a_at | Region | Hspa5         | 14828  | 2    | 34704257  | 34708619  | +    |
| 10092 | 1452065_at   | Region | BC027127      | 211739 | 11   | 16152565  | 16178979  | +    |
| 10093 | 1442150_at   | Region | None          | None   | 1    | 63409464  | 63410570  | +    |



|       |              |        |                   |        |      |           |           |      |
|-------|--------------|--------|-------------------|--------|------|-----------|-----------|------|
| 10094 | 1436660_at   | Region | Rrbp1             | 81910  | 2    | 143442799 | 143468120 | -    |
| 10095 | 1437868_at   | Region | BC023892          | 212943 | 9    | 85652955  | 85678535  | -    |
| 10096 | 1438684_at   | Region | Nuak1             | 77976  | 10   | 84266116  | 84335276  | -    |
| 10097 | 1435735_x_at | Region | H47               | 109815 | 7    | 59963883  | 59973627  | +    |
| 10098 | 1431717_at   | Region | 3526401B18Rik     | 70774  | 12   | 73188475  | 73190231  | -    |
| 10099 | 1416808_at   | Region | Nid1              | 18073  | 13   | 12856586  | 12931160  | +    |
|       |              |        | 1200003110Rik /// |        |      |           |           |      |
|       |              |        | 1200016E24Rik /// |        |      |           |           |      |
|       |              |        | A130040M12Rik /// |        |      |           |           |      |
|       |              |        | E430024C06Rik /// |        |      |           |           |      |
|       |              |        | LOC433071 ///     |        |      |           |           |      |
|       |              |        | LOC546178 ///     |        |      |           |           |      |
| 10100 | 1427932_s_at | Region | LOC547372         | 319202 | NONE | NONE      | NONE      | NONE |
| 10101 | 1454834_at   | Region | Nfib              | 18028  | 4    | 81281923  | 81491315  | -    |
| 10102 | 1460446_at   | Region | Wrb               | 71446  | 16   | 95583096  | 95595535  | +    |
| 10103 | 1417489_at   | Region | Npy2r             | 18167  | 3    | 82267450  | 82277153  | -    |
| 10104 | 1417653_at   | Region | Pvalb             | 19293  | 15   | 78243110  | 78258344  | -    |
| 10105 | 1439444_x_at | Region | 1110014C03Rik     | 68581  | 12   | 82210494  | 82242351  | -    |
| 10106 | 1442752_at   | Region | Opcml             | 330908 | 9    | 28570800  | 28821443  | +    |
| 10107 | 1451396_at   | Region | Pomt2             | 217734 | 12   | 83988455  | 84027132  | -    |
| 10108 | 1441429_at   | Region | Irs4              | 16370  | X    | 135151041 | 135165260 | -    |
| 10109 | 1455066_s_at | Region | 9130229H14Rik     | 236520 | 1    | 6211      | 14138     | -    |
| 10110 | 1416885_at   | Region | 1110038F14Rik     | 117171 | 15   | 77000761  | 77002949  | +    |
| 10111 | 1451627_a_at | Region | Slc1a2            | 20511  | 2    | 102411192 | 102482860 | +    |
| 10112 | 1441259_s_at | Region | Wdr10             | 81896  | 6    | 116291063 | 116364225 | +    |
| 10113 | 1426621_a_at | Region | Ppp2r2b           | 72930  | 18   | 42865902  | 42961824  | -    |
| 10114 | 1439548_at   | Region | Rap2b             | 74012  | 3    | 61043051  | 61046895  | +    |
| 10115 | 1428792_at   | Region | Bcas1             | 76960  | 2    | 169855881 | 169936561 | -    |
| 10116 | 1427685_a_at | Region | Synj2             | 20975  | 17   | 5881998   | 5950653   | +    |
| 10117 | 1460444_at   | Region | Arrb1             | 109689 | 7    | 93624118  | 93692062  | +    |
| 10118 | 1449450_at   | Region | Ptges             | 64292  | 2    | 30821633  | 30835459  | -    |
| 10119 | 1417301_at   | Region | Fzd6              | 14368  | 15   | 38905352  | 38937760  | +    |
| 10120 | 1428801_at   | Region | Mgat3             | 17309  | 15   | 80263672  | 80268219  | +    |
| 10121 | 1422629_s_at | Region | Shrm              | 27428  | 5    | 92019185  | 92300704  | +    |
| 10122 | 1424086_at   | Region | D9Ucla1           | 102644 | 9    | 43180556  | 43199094  | -    |
| 10123 | 1416022_at   | Region | Fabp5             | 16592  | 3    | 10011881  | 10015886  | +    |
| 10124 | 1451595_a_at | Region | Kcnq2             | 16536  | 2    | 180792537 | 180852183 | -    |
| 10125 | 1454656_at   | Region | Spata13           | 219140 | 14   | 55169182  | 55299693  | +    |
| 10126 | 1419249_at   | Region | Pftk1             | 18647  | 5    | 4809738   | 5386208   | -    |
| 10127 | 1434310_at   | Region | Bmpr2             | 12168  | 1    | 60068175  | 60174399  | +    |
| 10128 | 1436622_at   | Region | None              | None   | X    | 145713414 | 145729005 | +    |
| 10129 | 1449221_a_at | Region | Rrbp1             | 81910  | 2    | 143442799 | 143468120 | -    |
| 10130 | 1434107_at   | Region | Spata2            | 263876 | 2    | 166938128 | 166949596 | -    |
| 10131 | 1428466_at   | Region | Chd3              | 216848 | 11   | 69068931  | 69091238  | -    |
| 10132 | 1441369_at   | Region | None              | None   | 18   | 40765877  | 40766773  | +    |
| 10133 | 1417141_at   | Region | Igtp              | 16145  | 11   | 57925185  | 57933220  | +    |
| 10134 | 1416191_at   | Region | Sec61a1           | 53421  | 6    | 88938985  | 88954178  | -    |
| 10135 | 1429416_at   | Region | 2900074C18Rik     | 73032  | 7    | 23028864  | 23031149  | +    |
| 10136 | 1433959_at   | Region | Zmat4             | 320158 | 8    | 22424307  | 22817717  | +    |
| 10137 | 1441899_x_at | Region | Bcan              | 12032  | 3    | 87731261  | 87744094  | -    |
|       |              |        | Npas3 ///         |        |      |           |           |      |
|       |              |        | LOC544865 ///     |        |      |           |           |      |
| 10138 | 1450287_at   | Region | LOC546536         | 27386  | 12   | 50702581  | 50824492  | +    |
| 10139 | 1417636_at   | Region | Slc6a9            | 14664  | 4    | 116794241 | 116828210 | +    |
| 10140 | 1433591_at   | Region | AI553587          | 103784 | 11   | 17106711  | 17128589  | +    |
| 10141 | 1438796_at   | Region | None              | None   | 4    | 48001207  | 48002366  | +    |
| 10142 | 1448237_x_at | Region | Ldh2              | 16832  | 6    | 143333518 | 143351212 | -    |
| 10143 | 1451046_at   | Region | Zfpm1             | 22761  | 8    | 121663726 | 121718834 | +    |
| 10144 | 1455177_at   | Region | Ahi1              | 52906  | 10   | 20882283  | 21010464  | +    |
| 10145 | 1429246_a_at | Region | Anxa6             | 11749  | 11   | 54731952  | 54786255  | -    |
| 10146 | 1453329_s_at | Region | 6330571D19Rik     | 432450 | 10   | 31729508  | 31730785  | -    |
| 10147 | 1428063_at   | Region | Ankrd46           | 68839  | 15   | 36479034  | 36498329  | -    |
| 10148 | 1420872_at   | Region | Gucy1b3           | 54195  | 3    | 81761066  | 81803745  | -    |
| 10149 | 1453008_at   | Region | 2300002D11Rik     | 69539  | 4    | 132452002 | 132459405 | -    |
| 10150 | 1422508_at   | Region | Atp6v1a1          | 11964  | 16   | 42970115  | 43022327  | -    |

|       |              |        |                 |        |    |           |           |   |
|-------|--------------|--------|-----------------|--------|----|-----------|-----------|---|
| 10151 | 1448739_x_at | Region | Rps18           | 20084  | 17 | 31655742  | 31659385  | - |
| 10152 | 1417943_at   | Region | Gng4            | 14706  | 13 | 13229694  | 13273161  | + |
| 10153 | 1426167_a_at | Region | Camk4           | 12326  | 18 | 33179625  | 33409958  | + |
| 10154 | 1433802_at   | Region | AW125688        | 381199 | 19 | 4868127   | 4874267   | - |
| 10155 | 1417380_at   | Region | Iqgap1          | 29875  | 7  | 74515481  | 74605994  | - |
| 10156 | 1427905_at   | Region | 1810063B07Rik   | 67509  | 14 | 18438397  | 18446022  | - |
| 10157 | 1418494_at   | Region | Ebf2            | 13592  | 14 | 61760384  | 61959861  | + |
| 10158 | 1450088_a_at | Region | Mobp            | 17433  | 9  | 120159695 | 120186044 | + |
| 10159 | 1423075_at   | Region | Lman2           | 66890  | 13 | 53952542  | 53972056  | - |
| 10160 | 1423607_at   | Region | Lum             | 17022  | 10 | 97546067  | 97553024  | + |
| 10161 | 1415822_at   | Region | Scd2            | 20250  | 19 | 43838494  | 43851266  | + |
| 10162 | 1418505_at   | Region | Nudt4           | 71207  | 10 | 95523184  | 95539880  | - |
| 10163 | 1426542_at   | Region | 2310067E08Rik   | 71946  | 9  | 14189509  | 14216547  | - |
| 10164 | 1426587_a_at | Region | Stat3           | 20848  | 11 | 100709309 | 100760491 | - |
| 10165 | 1423365_at   | Region | Cacna1g         | 12291  | 11 | 94229603  | 94294812  | - |
| 10166 | 1441065_at   | Region | None            | None   | 13 | 15057247  | 15057834  | + |
|       |              |        | MGI:1931466 /// |        |    |           |           |   |
| 10167 | 1447909_s_at | Region | LOC432812       | 432812 | 13 | 60225860  | 60254605  | + |
| 10168 | 1422018_at   | Region | Hivep2          | 15273  | 10 | 14029087  | 14051962  | + |
| 10169 | 1459723_at   | Region | Gm262           | 238331 | 12 | 83857606  | 83862901  | - |
| 10170 | 1416766_at   | Region | Mosc2           | 67247  | 1  | 184311520 | 184344299 | - |
| 10171 | 1423545_a_at | Region | Zfp207          | 22680  | 11 | 80109005  | 80121796  | + |
| 10172 | 1426028_a_at | Region | Cit             | 12704  | 5  | 114963119 | 115127860 | + |
| 10173 | 1451796_s_at | Region | Hdc             | 15186  | 2  | 126107521 | 126132518 | - |
| 10174 | 1440323_at   | Region | Syt2            | 20980  | 1  | 134496944 | 134599680 | + |
| 10175 | 1416445_at   | Region | 2810405J04Rik   | 72722  | 17 | 73347397  | 73361507  | - |
| 10176 | 1423679_at   | Region | 2810432L12Rik   | 67063  | 4  | 49500451  | 49513677  | - |
| 10177 | 1418320_at   | Region | Prss8           | 76560  | 7  | 121975527 | 121979904 | - |
| 10178 | 1435308_at   | Region | Fut9            | 14348  | 4  | 25753460  | 25935314  | - |
| 10179 | 1428250_at   | Region | Gpr30           | 76854  | 5  | 138420671 | 138425280 | + |
| 10180 | 1449420_at   | Region | Pde1b           | 18574  | 15 | 103566380 | 103593133 | + |
| 10181 | 1453273_at   | Region | Kcnv1           | 67498  | 15 | 45052998  | 45061646  | - |
| 10182 | 1440201_at   | Region | AV344025        | 106755 | 17 | 79205697  | 79206709  | - |
| 10183 | 1422452_at   | Region | Bag3            | 29810  | 7  | 122573079 | 122596498 | + |
| 10184 | 1429891_at   | Region | Capsl           | 75568  | 15 | 9248356   | 9279435   | + |
| 10185 | 1429315_at   | Region | Syt11           | 229521 | 3  | 88489566  | 88516404  | - |
| 10186 | 1444693_at   | Region | Cacnb2          | 12296  | 2  | 14530578  | 14913205  | + |
| 10187 | 1448380_at   | Region | Lgals3bp        | 19039  | 11 | 118213845 | 118223024 | - |
| 10188 | 1436876_at   | Region | D13Bwg1146e     | 52882  | 13 | 101166216 | 101269810 | - |
| 10189 | 1418135_at   | Region | Aff1            | 17355  | 5  | 102817913 | 102885914 | + |
| 10190 | 1417241_at   | Region | X83328          | 13929  | 11 | 109247065 | 109273461 | + |
| 10191 | 1419686_at   | Region | Tsga14          | 83922  | 6  | 30701454  | 30741755  | - |
| 10192 | 1451219_at   | Region | Ormdl1          | 227102 | 1  | 53604628  | 53617817  | + |
| 10193 | 1433687_at   | Region | Al662250        | 106639 | 17 | 54402558  | 54406722  | - |
| 10194 | 1421546_a_at | Region | Racgap1         | 26934  | 15 | 99677712  | 99708837  | - |
| 10195 | 1424565_at   | Region | Polr3d          | 67065  | 14 | 64754785  | 64759436  | - |
| 10196 | 1417039_a_at | Region | Cul7            | 66515  | 17 | 44160990  | 44175008  | + |
| 10197 | 1439612_at   | Region | Cacna1b         | 12287  | 2  | 24538537  | 24695314  | - |
| 10198 | 1434657_at   | Region | Gls             | 14660  | 1  | 52466745  | 52534174  | - |
| 10199 | 1448478_at   | Region | Trfp            | 56771  | 17 | 45130056  | 45142878  | + |
| 10200 | 1459144_at   | Region | Fndc3           | 319448 | 14 | 66891442  | 67062343  | - |
| 10201 | 1417577_at   | Region | Trpc3           | 22065  | 3  | 36084163  | 36135201  | - |
| 10202 | 1448757_at   | Region | Pml             | 18854  | 9  | 58332803  | 58364326  | - |
| 10203 | 1441801_at   | Region | Gtf2f2          | 68705  | 14 | 70239863  | 70353356  | - |
| 10204 | 1423034_at   | Region | Txn15           | 52700  | 11 | 71933212  | 71936145  | + |
| 10205 | 1433708_at   | Region | Srp68           | 217337 | 11 | 116066259 | 116095310 | - |
| 10206 | 1437390_x_at | Region | Stx1a           | 20907  | 5  | 134037064 | 134064591 | + |
| 10207 | 1448487_at   | Region | Lrrfip1         | 16978  | 1  | 90875248  | 90952241  | + |
| 10208 | 1455672_s_at | Region | Cplx2           | 12890  | 13 | 52985707  | 52986681  | + |
| 10209 | 1455609_at   | Region | C030025P15Rik   | 320895 | 5  | 115129574 | 115130430 | + |
| 10210 | 1437056_x_at | Region | Crispld2        | 78892  | 8  | 119359392 | 119408065 | + |
| 10211 | 1417027_at   | Region | Trim2           | 80890  | 3  | 83898180  | 83960638  | - |
| 10212 | 1424949_at   | Region | Huwe1           | 59026  | X  | 145451533 | 145469813 | + |
| 10213 | 1416452_at   | Region | Oat             | 18242  | 7  | 126923351 | 126936010 | - |
| 10214 | 1450380_at   | Region | Epdr2           | 105298 | 13 | 19073208  | 19101305  | - |

|       |              |        |               |        |    |           |           |   |
|-------|--------------|--------|---------------|--------|----|-----------|-----------|---|
| 10215 | 1435512_at   | Region | Al836003      | 239650 | 15 | 98243222  | 98245696  | + |
| 10216 | 1433522_at   | Region | Pskh1         | 244631 | 8  | 105196321 | 105227649 | + |
| 10217 | 1430820_a_at | Region | Bbx           | 70508  | 16 | 49039981  | 49275616  | - |
| 10218 | 1438784_at   | Region | None          | None   | 12 | 103385220 | 103385903 | - |
| 10219 | 1448325_at   | Region | Myd116        | 17872  | 7  | 39605336  | 39608716  | - |
| 10220 | 1422773_at   | Region | Myt1          | 17932  | 2  | 181483998 | 181544724 | + |
| 10221 | 1435120_at   | Region | None          | None   | 8  | 101921874 | 101922507 | - |
| 10222 | 1450017_at   | Region | Ccng1         | 12450  | 11 | 40489722  | 40494170  | - |
| 10223 | 1436163_at   | Region | Kcnj16        | 16517  | 11 | 110789161 | 110849057 | + |
|       |              |        | SFT2 domain   |        |    |           |           |   |
| 10224 | 1435141_at   | Region | containing 2  | 108735 | 1  | 165097432 | 165117255 | - |
| 10225 | 1454666_at   | Region | Klf3          | 16599  | 5  | 63601098  | 63627704  | + |
| 10226 | 1448018_at   | Region | Rere          | 68703  | 4  | 148898702 | 149114159 | + |
| 10227 | 1423743_at   | Region | Arcn1         | 213827 | 9  | 44730423  | 44756652  | - |
| 10228 | 1432164_a_at | Region | Gcsh          | 68133  | 8  | 116311176 | 116322181 | - |
| 10229 | 1453620_at   | Region | 3010022N24Rik | 68069  | 6  | 18562938  | 18564218  | - |
| 10230 | 1428265_at   | Region | Ppp2r1b       | 73699  | 9  | 50938901  | 50953949  | + |
| 10231 | 1439334_at   | Region | None          | None   | X  | 135167546 | 135168172 | + |
| 10232 | 1452597_at   | Region | 2310061C15Rik | 66531  | 8  | 116217815 | 116249733 | - |
| 10233 | 1451413_at   | Region | Cast          | 12380  | 13 | 70751497  | 70865131  | - |
| 10234 | 1428976_at   | Region | Tmpo          | 21917  | 10 | 91133084  | 91142861  | - |
| 10235 | 1459860_x_at | Region | Trim2         | 80890  | 3  | 83898180  | 83960638  | - |
| 10236 | 1438774_s_at | Region | Pgm211        | 70974  | 7  | 94334296  | 94382030  | + |
| 10237 | 1423262_a_at | Region | H3f3a         | 15078  | 1  | 180756388 | 180767423 | - |
| 10238 | 1429718_at   | Region | Slitrk5       | 75409  | 14 | 106214046 | 106222066 | + |
| 10239 | 1425052_at   | Region | 2610034N03Rik | 66307  | 18 | 58884044  | 58904170  | + |
| 10240 | 1437842_at   | Region | A330045H12Rik | 403178 | 5  | 109150217 | 109154339 | + |
| 10241 | 1435368_a_at | Region | Parp1         | 11545  | 1  | 180523221 | 180555500 | + |
| 10242 | 1451991_at   | Region | Epha7         | 13841  | 4  | 28997442  | 29149372  | + |
| 10243 | 1435314_at   | Region | Tph2          | 216343 | 10 | 114762957 | 114869788 | - |
| 10244 | 1422577_at   | Region | Cs            | 12974  | 10 | 128074651 | 128099298 | + |
| 10245 | 1415801_at   | Region | Gja1          | 14609  | 10 | 56627159  | 56640230  | + |
| 10246 | 1452267_at   | Region | Flywch1       | 224613 | 17 | 21557603  | 21565956  | - |
| 10247 | 1418474_at   | Region | 1500005A01Rik | 85308  | 14 | 50099490  | 50103265  | - |
| 10248 | 1428718_at   | Region | Scrn1         | 69938  | 6  | 54653141  | 54710707  | - |
| 10249 | 1450047_at   | Region | Hs6st2        | 50786  | X  | 45909852  | 46201195  | - |
| 10250 | 1436961_at   | Region | Hspa12a       | 73442  | 19 | 58396851  | 58460502  | - |
| 10251 | 1427426_at   | Region | Kcnq5         | 226922 | 1  | 21628315  | 22188135  | - |
| 10252 | 1426013_s_at | Region | Plekha4       | 69217  | 7  | 39574953  | 39637592  | + |
| 10253 | 1425563_s_at | Region | Pcdh10        | 18526  | 3  | 44837486  | 44841910  | + |
| 10254 | 1433566_at   | Region | Rasl10b       | 276952 | 11 | 83137304  | 83146823  | + |
| 10255 | 1457658_x_at | Region | Anxa4         | 11746  | 6  | 87171158  | 87227870  | - |
| 10256 | 1435117_a_at | Region | C330021A05Rik | 217378 | 12 | 3234875   | 3262331   | + |
| 10257 | 1420123_at   | Region | Tcta          | 102791 | 9  | 108372719 | 108375712 | - |
| 10258 | 1415978_at   | Region | Tubb3         | 22152  | 8  | 122786461 | 122796907 | + |
|       |              |        | Rpl13 ///     |        |    |           |           |   |
|       |              |        | LOC280047 /// |        |    |           |           |   |
|       |              |        | LOC432861 /// |        |    |           |           |   |
| 10259 | 1460581_a_at | Region | LOC547376     | 270106 | 8  | 122483697 | 122486521 | + |
| 10260 | 1417040_a_at | Region | Bok           | 51800  | 1  | 93513185  | 93523253  | + |
| 10261 | 1439332_at   | Region | Ddit4l        | 73284  | 3  | 136513537 | 136518197 | + |
| 10262 | 1422721_at   | Region | Tnk1          | 83813  | 11 | 69576757  | 69584375  | - |
| 10263 | 1434301_at   | Region | D330050I23Rik | 399603 | 15 | 60824299  | 60827416  | - |
| 10264 | 1425053_at   | Region | Isoc1         | 66307  | 18 | 58884044  | 58904170  | + |
| 10265 | 1423506_a_at | Region | Nnat          | 18111  | 2  | 157017092 | 157019473 | + |
| 10266 | 1424375_s_at | Region | Gimap4        | 107526 | 6  | 48816795  | 48824784  | + |
| 10267 | 1420473_at   | Region | Mtpn          | 14489  | 6  | 35603109  | 35634015  | - |
| 10268 | 1453004_at   | Region | 3110004L20Rik | 73102  | 13 | 33714148  | 33929039  | - |
| 10269 | 1421441_at   | Region | Angpt1        | 11600  | 15 | 42335548  | 42587605  | - |
| 10270 | 1460360_at   | Region | Asrgl1        | 66514  | 19 | 8308266   | 8332113   | - |
| 10271 | 1436508_at   | Region | 2410014A08Rik | 109154 | 5  | 114254717 | 114267772 | - |
| 10272 | 1422578_at   | Region | Cs            | 12974  | 10 | 128074651 | 128099298 | + |
| 10273 | 1430779_at   | Region | A930010C08Rik | 77943  | 3  | 109951781 | 109952402 | - |
| 10274 | 1437065_at   | Region | 7330412A13Rik | 78143  | 16 | 42509171  | 42511979  | + |
| 10275 | 1455148_at   | Region | C130036G08    | 243339 | 5  | 143778139 | 143803802 | - |

|       |              |        |               |        |      |           |           |      |
|-------|--------------|--------|---------------|--------|------|-----------|-----------|------|
| 10276 | 1449245_at   | Region | Grin2c        | 14813  | 11   | 115070262 | 115088336 | -    |
| 10277 | 1455289_at   | Region | B930093C12Rik | 268445 | 11   | 77196147  | 77198731  | -    |
| 10278 | 1417402_at   | Region | 1190017O12Rik | 68936  | 16   | 91458563  | 91470749  | +    |
| 10279 | 1417181_a_at | Region | Kifap3        | 16579  | 1    | 163697221 | 163834642 | +    |
| 10280 | 1426306_a_at | Region | Maged2        | 80884  | X    | 144340816 | 144348677 | -    |
| 10281 | 1435788_at   | Region | 2900086B20Rik | 73074  | 12   | 67798894  | 67799727  | +    |
| 10282 | 1419706_a_at | Region | Akap12        | 83397  | 10   | 6145386   | 6238479   | -    |
| 10283 | 1449441_a_at | Region | Wbp1          | 22377  | 6    | 83462734  | 83465112  | -    |
| 10284 | 1455325_at   | Region | A230057G18Rik | 330166 | 5    | 111288191 | 111298937 | -    |
| 10285 | 1418528_a_at | Region | Dad1          | 13135  | 14   | 48755589  | 48773800  | -    |
| 10286 | 1434005_at   | Region | Rbms1         | 56878  | 2    | 60608122  | 60818320  | -    |
| 10287 | 1451028_at   | Region | Baiap2        | 108100 | 11   | 119764194 | 119822580 | +    |
| 10288 | 1444503_at   | Region | Gbas          | 14467  | 5    | 128900966 | 128934118 | +    |
| 10289 | 1432103_a_at | Region | Sh3gl3        | 20408  | 7    | 76116902  | 76163933  | +    |
| 10290 | 1420172_at   | Region | Myh9          | 17886  | 15   | 77812545  | 77894062  | -    |
| 10291 | 1435750_at   | Region | Gchfr         | 320415 | 2    | 118681637 | 118686238 | +    |
| 10292 | 1448832_a_at | Region | Cplx1         | 12889  | 5    | 107594772 | 107626145 | -    |
| 10293 | 1428945_at   | Region | 5730469D23Rik | 231380 | 5    | 85372730  | 85434753  | -    |
| 10294 | 1428928_at   | Region | 3110038O15Rik | 73120  | 2    | 52360370  | 52361890  | -    |
| 10295 | 1416276_a_at | Region | Rps4x         | 20102  | X    | 96786304  | 96790667  | -    |
| 10296 | 1456733_x_at | Region | Serpinh1      | 12406  | 7    | 93433937  | 93441711  | -    |
| 10297 | 1424523_at   | Region | Elmo1         | 140580 | 13   | 19666927  | 20088452  | +    |
| 10298 | 1424707_at   | Region | 1110014C03Rik | 68581  | 12   | 82210494  | 82242351  | -    |
| 10299 | 1429503_at   | Region | 2900024C23Rik | 67266  | 5    | 106978787 | 107057482 | -    |
| 10300 | 1455375_at   | Region | None          | None   | 1    | 181855245 | 181855800 | -    |
| 10301 | 1419546_at   | Region | Atp6v1c1      | 66335  | 15   | 38667202  | 38697131  | +    |
| 10302 | 1439740_s_at | Region | AI481316      | 98383  | 1    | 167156103 | 167156616 | -    |
| 10303 | 1452654_at   | Region | Zdhhc2        | 70546  | 8    | 39367458  | 39428485  | +    |
| 10304 | 1424567_at   | Region | Tspan2        | 70747  | 3    | 102162658 | 102198922 | +    |
| 10305 | 1418476_at   | Region | Crlf1         | 12931  | 8    | 1573      | 4254      | -    |
| 10306 | 1455708_at   | Region | Tmod3         | 50875  | 9    | 75635361  | 75697149  | -    |
| 10307 | 1438572_at   | Region | Csmd3         | 239420 | 15   | 47577326  | 48359844  | -    |
| 10308 | 1453849_s_at | Region | Hnrpab        | 15384  | 11   | 51352941  | 51359688  | -    |
| 10309 | 1451634_at   | Region | 2810051F02Rik | 72704  | NONE | NONE      | NONE      | NONE |
| 10310 | 1428615_at   | Region | P2ry5         | 67168  | 14   | 67589330  | 67591777  | +    |
| 10311 | 1453065_at   | Region | Aldh5a1       | 214579 | 13   | 24390909  | 24417538  | -    |
| 10312 | 1417090_at   | Region | Rcn1          | 19672  | 2    | 105091687 | 105103993 | -    |
| 10313 | 1448534_at   | Region | Ptpns1        | 19261  | 2    | 129107171 | 129144785 | +    |
| 10314 | 1435255_at   | Region | Plxnb1        | 235611 | 9    | 109142184 | 109166503 | +    |
| 10315 | 1455558_at   | Region | Gm114         | 228730 | 2    | 146291291 | 146427030 | +    |
| 10316 | 1418774_a_at | Region | Atp7a         | 11977  | X    | 100628682 | 100726282 | +    |
| 10317 | 1428864_at   | Region | 5530400B01Rik | 71434  | 7    | 136492281 | 136494259 | -    |
| 10318 | 1449471_at   | Region | Kcnmb4        | 58802  | 10   | 116107314 | 116162975 | -    |
| 10319 | 1435450_at   | Region | Cpne3         | 70568  | 4    | 19448948  | 19497068  | -    |
| 10320 | 1424789_at   | Region | Hkr2          | 232878 | 7    | 10891496  | 10901920  | +    |
| 10321 | 1431280_at   | Region | AI597468      | 103266 | 10   | 84997433  | 85015279  | +    |
| 10322 | 1448949_at   | Region | Car4          | 12351  | 11   | 84685835  | 84694036  | +    |
| 10323 | 1423515_at   | Region | Scn8a         | 20273  | 15   | 100993863 | 101098226 | +    |
| 10324 | 1418851_at   | Region | Trim39        | 79263  | 17   | 34008393  | 34021525  | -    |
| 10325 | 1420667_at   | Region | Doc2b         | 13447  | 11   | 75494748  | 75521715  | -    |
| 10326 | 1460615_at   | Region | Nt5c211       | 319638 | 10   | 34364736  | 34479712  | -    |
| 10327 | 1435017_at   | Region | Mel13         | 217149 | 11   | 97506688  | 97509712  | +    |
| 10328 | 1423571_at   | Region | Edg1          | 13609  | 3    | 114480955 | 114485563 | -    |
| 10329 | 1417149_at   | Region | P4ha2         | 18452  | 11   | 53854357  | 53884489  | +    |
| 10330 | 1417674_s_at | Region | Golga4        | 54214  | 9    | 118500315 | 118578377 | +    |
| 10331 | 1418868_at   | Region | En2           | 13799  | 5    | 26616504  | 26622197  | +    |
| 10332 | 1441983_at   | Region | None          | None   | 16   | 94153738  | 94154753  | -    |
| 10333 | 1419601_at   | Region | Kcnj10        | 16513  | 1    | 172270320 | 172303004 | +    |
| 10334 | 1422586_at   | Region | Ecel1         | 13599  | 1    | 86963814  | 86971186  | -    |
| 10335 | 1425110_at   | Region | Sorcs3        | 66673  | 19   | 47757239  | 48356719  | +    |
| 10336 | 1452327_at   | Region | lqsec1        | 232227 | 6    | 91098830  | 91101520  | -    |
| 10337 | 1418501_a_at | Region | Oxr1          | 170719 | 15   | 41691294  | 41762827  | +    |
| 10338 | 1417304_at   | Region | Chrd          | 12667  | 16   | 19504234  | 19513489  | +    |
| 10339 | 1425248_a_at | Region | Tyro3         | 22174  | 2    | 119313419 | 119331330 | +    |
| 10340 | 1418273_a_at | Region | Rpl30         | 19946  | 15   | 34440221  | 34442933  | -    |

|       |              |        |               |        |      |           |           |      |
|-------|--------------|--------|---------------|--------|------|-----------|-----------|------|
| 10341 | 1428316_a_at | Region | Fundc2        | 67391  | X    | 70043077  | 70056771  | +    |
| 10342 | 1438540_at   | Region | None          | None   | 3    | 129529323 | 129529976 | +    |
| 10343 | 1452608_at   | Region | Mycbp         | 56309  | 4    | 122932163 | 122939256 | +    |
| 10344 | 1452081_a_at | Region | 9130017N09Rik | 78906  | 10   | 79943645  | 79953076  | +    |
| 10345 | 1426550_at   | Region | Sidt1         | 320007 | 16   | 43123510  | 43216168  | -    |
| 10346 | 1444761_at   | Region | None          | None   | 7    | 13947701  | 13948427  | +    |
| 10347 | 1450705_at   | Region | Rdbp          | 27632  | 17   | 32553733  | 32558972  | +    |
| 10348 | 1452225_at   | Region | 2010106G01Rik | 66552  | 2    | 126407985 | 126447088 | -    |
| 10349 | 1428709_a_at | Region | Mrpl24        | 67707  | 3    | 87663204  | 87667324  | +    |
| 10350 | 1423472_at   | Region | 38597         | 18000  | 1    | 93316614  | 93337221  | +    |
| 10351 | 1417289_at   | Region | Plekha2       | 83436  | 8    | 23764086  | 23824498  | -    |
| 10352 | 1437292_at   | Region | A330019N05Rik | 215890 | 10   | 33567437  | 33679703  | -    |
| 10353 | 1444696_at   | Region | None          | None   | 14   | 54173610  | 54174656  | -    |
| 10354 | 1424186_at   | Region | 2610001E17Rik | 67896  | 16   | 43977206  | 44010706  | +    |
| 10355 | 1442889_at   | Region | None          | None   | 13   | 18629651  | 18630452  | +    |
| 10356 | 1455344_at   | Region | AW494418      | 99908  | NONE | NONE      | NONE      | NONE |
| 10357 | 1427537_at   | Region | Eppk1         | 223650 | 15   | 76152276  | 76168867  | -    |
| 10358 | 1455618_x_at | Region | 1300010A20Rik | 232670 | 6    | 29741353  | 29765655  | +    |
| 10359 | 1416807_at   | Region | Rpl36a        | 19982  | X    | 128130624 | 128132999 | +    |
|       |              |        | Rps14 ///     |        |      |           |           |      |
| 10360 | 1437706_x_at | Region | LOC545121     | 20044  | 18   | 60999975  | 61003870  | +    |
| 10361 | 1428741_at   | Region | Elavl4        | 15572  | 4    | 109165070 | 109310814 | -    |
| 10362 | 1450414_at   | Region | Pdgfb         | 18591  | 15   | 80048194  | 80067128  | -    |
| 10363 | 1451229_at   | Region | Hdac11        | 232232 | 6    | 91599688  | 91617556  | +    |
| 10364 | 1419823_s_at | Region | Ksr           | 16706  | 11   | 78740461  | 78872020  | -    |
| 10365 | 1448401_at   | Region | Smarcd2       | 83796  | 11   | 106084275 | 106088711 | -    |
| 10366 | 1426752_at   | Region | Phf17         | 269424 | 3    | 41010564  | 41046427  | +    |
| 10367 | 1418510_s_at | Region | Fbxo8         | 50753  | 8    | 55605791  | 55648596  | +    |
| 10368 | 1415881_at   | Region | Ghitm         | 66092  | 14   | 35253316  | 35267764  | -    |
| 10369 | 1421978_at   | Region | Gad2          | 14417  | 2    | 22584120  | 22652794  | +    |
| 10370 | 1456251_x_at | Region | Bzrp          | 12257  | 15   | 83612210  | 83636054  | +    |
| 10371 | 1423765_at   | Region | BC023151      | 212974 | 7    | 135343568 | 135349645 | +    |
| 10372 | 1424373_at   | Region | Armxc3        | 71703  | X    | 128301536 | 128306395 | +    |
| 10373 | 1425929_a_at | Region | Rnf14         | 56736  | 18   | 38520411  | 38541525  | +    |
| 10374 | 1416329_at   | Region | Cyfp1         | 20430  | 7    | 50141336  | 50199963  | +    |
| 10375 | 1416026_a_at | Region | Rpl12         | 269261 | 2    | 32893888  | 32896203  | +    |
| 10376 | 1451364_at   | Region | Polr3gl       | 69870  | 3    | 96065710  | 96081979  | -    |
| 10377 | 1419044_at   | Region | Cntnap4       | 170571 | 8    | 111866933 | 112181180 | +    |
| 10378 | 1435832_at   | Region | Lrrc4         | 192198 | 6    | 28876498  | 28878711  | -    |
| 10379 | 1435256_at   | Region | 1500005P14Rik | 76686  | 7    | 25693378  | 25719722  | +    |
| 10380 | 1437333_x_at | Region | Aldh18a1      | 56454  | 19   | 40094578  | 40132690  | -    |
| 10381 | 1423817_s_at | Region | 2010315L10Rik | 67023  | 8    | 70517056  | 70519559  | +    |
| 10382 | 1455165_at   | Region | None          | None   | 9    | 69518542  | 69520199  | +    |
| 10383 | 1446622_at   | Region | A330068G13Rik | 414087 | 7    | 71965890  | 71966527  | -    |
| 10384 | 1450970_at   | Region | Got1          | 14718  | 19   | 43044161  | 43068915  | -    |
| 10385 | 1426567_a_at | Region | Pqlc1         | 66943  | 18   | 80379828  | 80416235  | +    |
| 10386 | 1457292_at   | Region | 4930553M18Rik | 75316  | 9    | 15143402  | 15154138  | +    |
| 10387 | 1460672_at   | Region | 2410002F23Rik | 66976  | 7    | 38321775  | 38326651  | +    |
| 10388 | 1429131_at   | Region | Ube2v2        | 70620  | 16   | 14321751  | 14363568  | -    |
| 10389 | 1443904_at   | Region | Fads6         | 328035 | 11   | 115104459 | 115118607 | -    |
| 10390 | 1424743_at   | Region | 2610003J06Rik | 72106  | 17   | 23635208  | 23637927  | +    |
| 10391 | 1431008_at   | Region | 0610037M15Rik | 68395  | NONE | NONE      | NONE      | NONE |
| 10392 | 1453055_at   | Region | Sema6d        | 214968 | 2    | 124124149 | 124181623 | +    |
| 10393 | 1450027_at   | Region | Sdc3          | 20970  | 4    | 129589463 | 129623202 | +    |
|       |              |        | Capza1 ///    |        |      |           |           |      |
| 10394 | 1452038_at   | Region | LOC546155     | 12340  | 3    | 104249759 | 104291308 | -    |
| 10395 | 1439026_at   | Region | Trpm3         | 226025 | 19   | 21686135  | 22227805  | +    |
| 10396 | 1451339_at   | Region | Suox          | 211389 | 10   | 128406984 | 128410951 | -    |
| 10397 | 1426622_a_at | Region | Qpct          | 70536  | 17   | 76864189  | 76911773  | +    |
| 10398 | 1423885_at   | Region | Lamc1         | 226519 | 1    | 153103649 | 153217512 | -    |
| 10399 | 1440270_at   | Region | Fgf12         | 14167  | 16   | 26943562  | 27228998  | -    |
| 10400 | 1454708_at   | Region | Ablim1        | 226251 | 19   | 56622771  | 56801757  | -    |
| 10401 | 1422866_at   | Region | Col13a1       | 12817  | 10   | 61804824  | 61945626  | -    |
| 10402 | 1427019_at   | Region | Ptprz1        | 19283  | 6    | 22927206  | 23056382  | +    |
| 10403 | 1417074_at   | Region | Ceacam10      | 26366  | 7    | 19954879  | 19962377  | +    |

|       |              |        |               |        |    |           |           |   |
|-------|--------------|--------|---------------|--------|----|-----------|-----------|---|
| 10404 | 1419278_at   | Region | Usp48         | 170707 | 4  | 136475016 | 136537437 | + |
| 10405 | 1427226_at   | Region | Epn2          | 13855  | 11 | 61242891  | 61305293  | - |
| 10406 | 1438201_at   | Region | None          | None   | 4  | 11885151  | 11885960  | - |
| 10407 | 1436702_at   | Region | BC034068      | 269642 | 5  | 32485166  | 32491323  | + |
| 10408 | 1426886_at   | Region | Cln5          | 211286 | 14 | 97610921  | 97623064  | + |
| 10409 | 1452936_at   | Region | Crtac1        | 72832  | 19 | 41827441  | 41976053  | - |
| 10410 | 1450114_at   | Region | Ksr           | 16706  | 11 | 78740461  | 78872020  | - |
| 10411 | 1435460_at   | Region | Prkg2         | 19092  | 5  | 97950831  | 98055222  | - |
| 10412 | 1440250_at   | Region | E130010M05Rik | 319847 | 1  | 82777551  | 82781741  | - |
| 10413 | 1418570_at   | Region | Ncstn         | 59287  | 1  | 171995017 | 172011613 | - |
| 10414 | 1416123_at   | Region | Ccnd2         | 12444  | 6  | 127802641 | 127824339 | - |
| 10415 | 1434635_at   | Region | Rph3a         | 19894  | 5  | 120092306 | 120161325 | - |
| 10416 | 1453756_at   | Region | 2900075N08Rik | 72991  | X  | 95924146  | 95926159  | + |
| 10417 | 1422432_at   | Region | Dbi           | 13167  | 1  | 119870842 | 119878615 | - |
| 10418 | 1415922_s_at | Region | Mlp           | 17357  | 4  | 128540757 | 128543088 | + |
| 10419 | 1424737_at   | Region | Thrsp         | 21835  | 7  | 91459228  | 91463781  | - |
| 10420 | 1420405_at   | Region | Slc01a4       | 28250  | 6  | 142613255 | 142664334 | - |
| 10421 | 1449423_at   | Region | Mast1         | 56527  | 8  | 84179304  | 84205636  | - |
| 10422 | 1443375_at   | Region | Gnas          | 14683  | 2  | 173709228 | 173771651 | + |
| 10423 | 1423477_at   | Region | Zic1          | 22771  | 9  | 91251432  | 91256620  | - |
| 10424 | 1436688_x_at | Region | Rpl14         | 67115  | 9  | 120583908 | 120587044 | + |
| 10425 | 1425767_a_at | Region | Six4          | 20474  | 12 | 69946438  | 69959424  | - |
| 10426 | 1447521_x_at | Region | D15Wsu169e    | 223666 | 15 | 76775364  | 76869603  | - |
| 10427 | 1450697_at   | Region | Slc30a7       | 66500  | 3  | 114716461 | 114777895 | - |
| 10428 | 1434761_at   | Region | Lrrtm3        | 216028 | 10 | 63866884  | 64028642  | - |
| 10429 | 1416406_at   | Region | Pea15         | 18611  | 1  | 172081687 | 172129498 | - |
| 10430 | 1425600_a_at | Region | Plcb1         | 18795  | 2  | 134734571 | 134986275 | + |
| 10431 | 1434849_at   | Region | Tspyl2        | 52808  | X  | 145871248 | 145876838 | - |
| 10432 | 1448356_at   | Region | Ube2d2        | 56550  | 18 | 35995272  | 36030828  | + |
| 10433 | 1427281_at   | Region | Scn2a1        | 110876 | 2  | 65619938  | 65621824  | + |
| 10434 | 1438072_at   | Region | Nfib          | 18028  | 4  | 81281923  | 81491315  | - |
| 10435 | 1433991_x_at | Region | Dbi           | 13167  | 1  | 119870842 | 119878615 | - |
| 10436 | 1451842_a_at | Region | Chrn3         | 108043 | 8  | 26137431  | 26169283  | + |
| 10437 | 1429138_at   | Region | Npas3         | 27386  | 12 | 50702581  | 50824492  | + |
| 10438 | 1423453_at   | Region | C78541        | 97961  | 15 | 78986217  | 78994920  | + |
| 10439 | 1428847_a_at | Region | Macf1         | 11426  | 4  | 122378001 | 122711301 | - |
| 10440 | 1448594_at   | Region | Wisp1         | 22402  | 15 | 66915598  | 66947404  | + |
| 10441 | 1434102_at   | Region | Nfib          | 18028  | 4  | 81281923  | 81491315  | - |
| 10442 | 1418540_a_at | Region | Ptpre         | 19267  | 7  | 129905416 | 130053886 | + |
| 10443 | 1439006_x_at | Region | 6430550H21Rik | 245386 | X  | 32718102  | 32773193  | - |
| 10444 | 1434885_at   | Region | 5830435K17Rik | 101685 | 7  | 41076681  | 41094192  | - |
| 10445 | 1437347_at   | Region | Ednrb         | 13618  | 14 | 98359614  | 98388688  | - |
| 10446 | 1416368_at   | Region | Gsta4         | 14860  | 9  | 78360919  | 78378190  | + |
| 10447 | 1455919_at   | Region | None          | None   | 11 | 66099894  | 66100557  | - |
| 10448 | 1435700_at   | Region | Tln2          | 70549  | 9  | 67349709  | 67668766  | - |
| 10449 | 1452183_a_at | Region | Gtl2          | 17263  | 12 | 105023823 | 105039917 | + |
| 10450 | 1429115_at   | Region | 2010003O02Rik | 66434  | 4  | 40408436  | 40409792  | + |
| 10451 | 1428427_at   | Region | Fbxl2         | 72179  | 9  | 114028966 | 114079010 | - |
| 10452 | 1448063_at   | Region | lqsec2        | 245666 | X  | 145713404 | 145759631 | + |
| 10453 | 1418010_a_at | Region | Sh3glb1       | 54673  | 3  | 143660519 | 143691998 | - |
| 10454 | 1415770_at   | Region | Wdr6          | 83669  | 9  | 108621311 | 108627764 | - |
| 10455 | 1456214_at   | Region | Pcdh7         | 54216  | 5  | 56521609  | 56532964  | + |
| 10456 | 1454424_at   | Region | 2610040L17Rik | 72464  | 11 | 36470417  | 36472016  | - |
| 10457 | 1422481_at   | Region | Krt2-1        | 16678  | 15 | 101903976 | 101909256 | - |
| 10458 | 1423511_at   | Region | Asf1a         | 66403  | 10 | 53842489  | 53854684  | + |
| 10459 | 1455296_at   | Region | Adcy5         | 224129 | 16 | 34082407  | 34088712  | + |
| 10460 | 1455631_at   | Region | H13           | 14950  | 2  | 152126435 | 152163760 | + |
| 10461 | 1452716_at   | Region | 5730469M10Rik | 70564  | 14 | 39139992  | 39160295  | - |
| 10462 | 1449405_at   | Region | Tns1          | 21961  | 1  | 74217097  | 74291359  | - |
| 10463 | 1426978_at   | Region | Klh2          | 77113  | 8  | 63808844  | 63849038  | - |
| 10464 | 1427680_a_at | Region | Nfib          | 18028  | 4  | 81281923  | 81491315  | - |
| 10465 | 1439022_at   | Region | Phactr1       | 218194 | 13 | 42242828  | 42700966  | + |
| 10466 | 1452344_at   | Region | Synj2         | 20975  | 17 | 5881998   | 5950653   | + |
| 10467 | 1459894_at   | Region | LOC544963     | 544963 | 13 | 91817361  | 91882649  | - |
| 10468 | 1426530_a_at | Region | Klh5          | 71778  | 5  | 63933500  | 63955461  | + |

|       |              |        |               |        |      |           |           |      |
|-------|--------------|--------|---------------|--------|------|-----------|-----------|------|
| 10469 | 1418104_at   | Region | Nrip3         | 78593  | 7    | 103610927 | 103634416 | -    |
| 10470 | 1449528_at   | Region | Figf          | 14205  | X    | 157972953 | 158002052 | +    |
| 10471 | 1450974_at   | Region | Timp4         | 110595 | 6    | 115681210 | 115687239 | -    |
| 10472 | 1425529_s_at | Region | D19Wsu162e    | 226178 | 19   | 46146382  | 46202440  | +    |
| 10473 | 1451227_a_at | Region | Slc10a3       | 214601 | X    | 69029872  | 69033911  | -    |
| 10474 | 1449059_a_at | Region | Oxct1         | 67041  | 15   | 3809284   | 3936636   | +    |
| 10475 | 1450667_a_at | Region | Cs            | 12974  | 10   | 128074651 | 128099298 | +    |
| 10476 | 1423136_at   | Region | Fgf1          | 14164  | 18   | 39062902  | 39142421  | -    |
| 10477 | 1433596_at   | Region | Dnajc6        | 72685  | 4    | 100509499 | 100601704 | +    |
| 10478 | 1419279_at   | Region | Pip5k2a       | 18718  | 2    | 18884270  | 19040126  | -    |
| 10479 | 1436921_at   | Region | Atp7a         | 11977  | X    | 100628682 | 100726282 | +    |
| 10480 | 1455845_at   | Region | BC030477      | 216881 | 11   | 71476361  | 71515305  | +    |
| 10481 | 1423157_at   | Region | Gnpnat1       | 54342  | 14   | 40454704  | 40467079  | -    |
| 10482 | 1417373_a_at | Region | Tuba4         | 22145  | 1    | 75502339  | 75506618  | -    |
| 10483 | 1435879_at   | Region | Akt3          | 23797  | 1    | 176955410 | 177064396 | -    |
| 10484 | 1460688_s_at | Region | AA407659      | 106840 | 5    | 114232192 | 114244601 | -    |
| 10485 | 1423561_at   | Region | Nell2         | 54003  | 15   | 95287908  | 95595549  | -    |
| 10486 | 1423256_a_at | Region | Atp6v1g1      | 66290  | 4    | 62636028  | 62641892  | +    |
| 10487 | 1449312_at   | Region | Npy5r         | 18168  | 8    | 65789090  | 65797217  | -    |
| 10488 | 1420583_a_at | Region | Rora          | 19883  | 9    | 69474948  | 69510983  | +    |
| 10489 | 1440071_at   | Region | Baiap1        | 14924  | 6    | 94131999  | 94737301  | -    |
| 10490 | 1436866_at   | Region | Efna5         | 13640  | 17   | 60297708  | 60574961  | -    |
| 10491 | 1448460_at   | Region | Acvr1         | 11477  | 2    | 58371977  | 58441698  | -    |
| 10492 | 1416826_a_at | Region | Trfp          | 56771  | 17   | 45130056  | 45142878  | +    |
| 10493 | 1456764_at   | Region | Slc35f3       | 210027 | 8    | 125586128 | 125683011 | +    |
| 10494 | 1460028_at   | Region | None          | None   | 6    | 92210633  | 92211004  | -    |
| 10495 | 1423624_at   | Region | Fancl         | 67030  | 11   | 26281874  | 26366666  | +    |
| 10496 | 1434032_at   | Region | None          | None   | 5    | 22946572  | 22947083  | +    |
| 10497 | 1460625_at   | Region | Gm1568        | 380768 | 12   | 77617054  | 77621942  | -    |
| 10498 | 1457243_at   | Region | None          | None   | NONE | NONE      | NONE      | NONE |
| 10499 | 1416029_at   | Region | Klf10         | 21847  | 15   | 38299350  | 38305644  | -    |
| 10500 | 1434784_s_at | Region | D15Ertd405e   | 380967 | 15   | 98040510  | 98045837  | +    |
| 10501 | 1425885_a_at | Region | Kcnab2        | 16498  | 4    | 150883106 | 150969841 | -    |
| 10502 | 1442214_at   | Region | Nfib          | 18028  | 4    | 81281923  | 81491315  | -    |
| 10503 | 1430675_at   | Region | 2900055J20Rik | 73001  | 18   | 40480760  | 40481502  | +    |
| 10504 | 1427888_a_at | Region | Spna2         | 20740  | 2    | 29927373  | 29963613  | +    |
| 10505 | 1454675_at   | Region | Thra          | 21833  | 11   | 98562960  | 98586198  | +    |
| 10506 | 1452843_at   | Region | Il6st         | 16195  | 13   | 108856634 | 108899366 | +    |
| 10507 | 1437528_x_at | Region | A730017C20Rik | 225583 | 18   | 59287736  | 59302184  | +    |
| 10508 | 1455760_at   | Region | None          | None   | 8    | 104663942 | 104664976 | +    |
| 10509 | 1429761_at   | Region | Rtn1          | 104001 | 12   | 69054243  | 69252428  | -    |
| 10510 | 1451215_at   | Region | 1190002C06Rik | 73137  | 18   | 57571393  | 57606175  | +    |
| 10511 | 1437614_x_at | Region | Zdhhc14       | 224454 | 17   | 5400177   | 5659646   | +    |
| 10512 | 1452888_at   | Region | 1110034G24Rik | 73747  | 2    | 132192859 | 132264907 | +    |
| 10513 | 1439479_at   | Region | Lct           | 226413 | 1    | 128127755 | 128156651 | -    |
| 10514 | 1451075_s_at | Region | Ctdsp2        | 52468  | 10   | 126728331 | 126732688 | -    |
| 10515 | 1437503_a_at | Region | MGI:1915044   | 66940  | 9    | 109085219 | 109104358 | +    |
| 10516 | 1428848_a_at | Region | Macf1         | 11426  | 4    | 122378001 | 122711301 | -    |
| 10517 | 1456134_x_at | Region | Yif1          | 68090  | 19   | 4877343   | 4881646   | +    |
| 10518 | 1427123_s_at | Region | Copg2as2      | 54158  | 6    | 30846849  | 30849105  | +    |
| 10519 | 1419630_a_at | Region | Trim11        | 94091  | 11   | 58703745  | 58717087  | +    |
| 10520 | 1417251_at   | Region | Palmd         | 114301 | 3    | 115687722 | 115739898 | -    |
| 10521 | 1418829_a_at | Region | Eno2          | 13807  | 6    | 125416602 | 125426275 | -    |
| 10522 | 1426799_at   | Region | Rab8b         | 235442 | 9    | 66968816  | 67043633  | -    |
| 10523 | 1427929_a_at | Region | Pdxk          | 216134 | 10   | 78549713  | 78575725  | -    |
| 10524 | 1428991_at   | Region | Hrasls        | 27281  | 16   | 27998437  | 28019272  | +    |
| 10525 | 1427407_s_at | Region | Trip11        | 109181 | 12   | 97280506  | 97358629  | -    |
| 10526 | 1438878_at   | Region | 6430537K16Rik | 320480 | 17   | 60539632  | 60540356  | -    |
| 10527 | 1415874_at   | Region | Spry1         | 24063  | 3    | 37103574  | 37108195  | +    |
| 10528 | 1459197_at   | Region | None          | None   | 15   | 92329361  | 92353854  | +    |
| 10529 | 1439117_at   | Region | Clnn          | 94040  | 12   | 100215893 | 100309212 | -    |
| 10530 | 1459746_at   | Region | R3hdm         | 226412 | 1    | 127946018 | 128080726 | +    |
| 10531 | 1455321_at   | Region | Ddhd1         | 114874 | 14   | 40672980  | 40701448  | -    |
| 10532 | 1458534_at   | Region | D13Bwg1146e   | 52882  | 13   | 101166216 | 101269810 | -    |
| 10533 | 1449738_s_at | Region | Exosc8        | 69639  | 3    | 54362900  | 54369613  | -    |

|       |              |        |                   |        |    |           |           |   |
|-------|--------------|--------|-------------------|--------|----|-----------|-----------|---|
| 10534 | 1417673_at   | Region | Grb14             | 50915  | 2  | 64767878  | 64878166  | - |
| 10535 | 1449142_a_at | Region | Yipf5             | 67180  | 18 | 40429229  | 40443156  | - |
| 10536 | 1433446_at   | Region | Hmgcs1            | 208715 | 13 | 114526    | 140291    | - |
| 10537 | 1447927_at   | Region | Mpa2l             | 100702 | 5  | 0         | 5299      | - |
| 10538 | 1435959_at   | Region | Arhgap15          | 76117  | 2  | 43681013  | 44318825  | + |
| 10539 | 1440056_at   | Region | None              | None   | 19 | 41142196  | 41142866  | - |
| 10540 | 1422980_a_at | Region | Bet1l             | 54399  | 7  | 135255293 | 135258149 | - |
| 10541 | 1427934_at   | Region | 2610208E05Rik     | 108755 | 4  | 33079058  | 33081043  | + |
| 10542 | 1434887_at   | Region | Freq              | 14299  | 2  | 31178085  | 31227634  | + |
| 10543 | 1425194_a_at | Region | 6330577E15Rik     | 67788  | 19 | 47283059  | 47286799  | + |
| 10544 | 1448808_a_at | Region | Nme2              | 18103  | 11 | 93770901  | 93777094  | - |
| 10545 | 1417879_at   | Region | Nenf              | 66208  | 1  | 191043062 | 191054383 | - |
| 10546 | 1437308_s_at | Region | F2r               | 14062  | 13 | 91791978  | 91808621  | - |
| 10547 | 1435706_at   | Region | None              | None   | 17 | 28025564  | 28026466  | - |
| 10548 | 1456436_x_at | Region | Rps20             | 67427  | 4  | 3761619   | 3762746   | - |
| 10549 | 1416042_s_at | Region | Nasp              | 50927  | 4  | 115560514 | 115586846 | - |
| 10550 | 1423150_at   | Region | Sgne1             | 20394  | 2  | 113399605 | 113452364 | - |
| 10551 | 1417872_at   | Region | Fhl1              | 14199  | X  | 51509047  | 51548058  | + |
| 10552 | 1452616_s_at | Region | Ssbp1             | 381760 | 6  | 40612256  | 40622665  | + |
| 10553 | 1416092_a_at | Region | Mtap4             | 17758  | 9  | 109957034 | 110109905 | + |
| 10554 | 1415947_at   | Region | Creg1             | 433375 | 1  | 165685557 | 165697081 | + |
| 10555 | 1449429_at   | Region | Fkbp1b            | 14226  | 12 | 4005389   | 4013790   | - |
| 10556 | 1422596_at   | Region | C030019F02Rik     | 58237  | 2  | 180651730 | 180671652 | - |
| 10557 | 1417355_at   | Region | Peg3              | 18616  | 7  | 5909405   | 5933864   | - |
| 10558 | 1427674_a_at | Region | Sez6              | 20370  | 11 | 77656602  | 77704707  | + |
| 10559 | 1448153_at   | Region | Cox5a             | 12858  | 9  | 57635235  | 57646353  | + |
| 10560 | 1451130_at   | Region | 2010315L10Rik     | 67023  | 8  | 70517056  | 70519559  | + |
| 10561 | 1421595_at   | Region | 9630031F12Rik     | 58227  | 5  | 44288471  | 44397958  | - |
| 10562 | 1426389_at   | Region | Camk1d            | 227541 | 2  | 5214190   | 5631787   | - |
| 10563 | 1436350_at   | Region | D430039N05Rik     | 241520 | 2  | 83510477  | 83579107  | + |
| 10564 | 1449084_s_at | Region | Sh3d19            | 27059  | 3  | 85819530  | 85872864  | + |
| 10565 | 1429159_at   | Region | 4631408O11Rik     | 66693  | 2  | 10169436  | 10172539  | + |
| 10566 | 1420362_a_at | Region | Biklk             | 12124  | 15 | 83575461  | 83593234  | + |
| 10567 | 1423392_at   | Region | Clic4             | 29876  | 4  | 134095226 | 134154017 | - |
| 10568 | 1448157_s_at | Region | Rpl10             | 110954 | X  | 68931512  | 68933781  | + |
| 10569 | 1417847_at   | Region | Ulk2              | 29869  | 11 | 61501302  | 61580259  | - |
| 10570 | 1447034_at   | Region | 8030448K23Rik     | 320826 | 13 | 95096672  | 95097144  | - |
| 10571 | 1423135_at   | Region | Thy1              | 21838  | 9  | 44034809  | 44037433  | + |
| 10572 | 1424319_at   | Region | Oraov1            | 72284  | 7  | 139327211 | 139333154 | + |
| 10573 | 1417441_at   | Region | Dnajc12           | 30045  | 10 | 63352440  | 63374606  | + |
| 10574 | 1430552_a_at | Region | Sbf1              | 77980  | 15 | 89339395  | 89368172  | - |
| 10575 | 1427405_s_at | Region | Rab11fip5         | 52055  | 6  | 85684683  | 85724625  | - |
| 10576 | 1446265_at   | Region | Dnm3              | 103967 | 1  | 161896669 | 162387092 | - |
| 10577 | 1418738_at   | Region | Scn1b             | 20266  | 7  | 26526157  | 26537211  | - |
| 10578 | 1416842_at   | Region | Gstm5             | 14866  | 3  | 107691596 | 107694427 | + |
| 10579 | 1438494_at   | Region | Hrh1              | 15465  | 6  | 114980341 | 115054903 | + |
| 10580 | 1429772_at   | Region | Plxna2            | 18845  | 1  | 194358488 | 194552987 | + |
| 10581 | 1422505_at   | Region | Chrac1            | 93696  | 15 | 73117409  | 73121072  | + |
| 10582 | 1436994_a_at | Region | Hist1h1c          | 50708  | 13 | 23218684  | 23220243  | + |
| 10583 | 1442080_at   | Region | Creb3l2           | 208647 | 6  | 37465296  | 37576712  | - |
| 10584 | 1424572_a_at | Region | H2afy             | 26914  | 13 | 54691912  | 54753184  | - |
| 10585 | 1437230_at   | Region | Kcna1             | 16485  | 6  | 127312007 | 127316405 | - |
| 10586 | 1424677_at   | Region | Cyp2j9            | 74519  | 4  | 95543502  | 95566558  | - |
| 10587 | 1416727_a_at | Region | Cyb5              | 109672 | 18 | 85019156  | 85047605  | + |
| 10588 | 1433688_x_at | Region | Rpl14             | 67115  | 9  | 120583908 | 120587044 | + |
| 10589 | 1452893_s_at | Region | 1110065P19Rik /// | 68919  | 4  | 41776994  | 41779094  | - |
| 10590 | 1426397_at   | Region | 2310040A07Rik     | 21813  | 9  | 116074629 | 116162211 | - |
| 10591 | 1436468_at   | Region | Tgfb2             | 27801  | 16 | 16994248  | 17006052  | - |
| 10592 | 1453098_at   | Region | Zdhhc8            | 14800  | 3  | 80417443  | 80531582  | - |
| 10593 | 1437219_at   | Region | Gria2             | 14800  | 3  | 80417443  | 80531582  | - |
| 10594 | 1437219_at   | Region | A330103N21Rik     | 77773  | 7  | 61907803  | 61908932  | + |
| 10594 | 1418840_at   | Region | Pdcd4             | 18569  | 19 | 53482344  | 53508727  | + |
| 10595 | 1454947_a_at | Region | BC002236          | 79560  | 11 | 44207410  | 44223282  | - |
| 10596 | 1440759_at   | Region | None              | None   | 3  | 106910406 | 106910834 | + |
| 10597 | 1416411_at   | Region | Gstm2             | 14863  | 3  | 107777444 | 107782176 | - |



|       |              |        |               |        |    |           |           |   |
|-------|--------------|--------|---------------|--------|----|-----------|-----------|---|
| 10598 | 1452184_at   | Region | Ndufb9        | 66218  | 15 | 58944967  | 58950646  | + |
| 10599 | 1417031_at   | Region | 2310028N02Rik | 66950  | 1  | 191062230 | 191089190 | + |
| 10600 | 1452227_at   | Region | 2310045A20Rik | 231238 | 5  | 51917296  | 52023458  | - |
| 10601 | 1443612_at   | Region | None          | None   | 2  | 110280744 | 110281219 | - |
| 10602 | 1419077_at   | Region | Mpp3          | 13384  | 11 | 101820749 | 101847992 | - |
| 10603 | 1458394_at   | Region | Slc6a17       | 229706 | 3  | 107263377 | 107313847 | - |
| 10604 | 1433517_at   | Region | None          | None   | 1  | 92464637  | 92469415  | - |
| 10605 | 1420124_s_at | Region | Tcta          | 102791 | 9  | 108372719 | 108375712 | - |
| 10606 | 1451693_a_at | Region | Fgf12         | 14167  | 16 | 26943562  | 27228998  | - |
| 10607 | 1428259_at   | Region | 2310075M15Rik | 69675  | 12 | 26573857  | 26588960  | + |
| 10608 | 1437947_x_at | Region | None          | None   | 1  | 32009779  | 32010021  | + |
| 10609 | 1418492_at   | Region | Grem2         | 23893  | 1  | 174766769 | 174854520 | - |
| 10610 | 1416303_at   | Region | Litaf         | 56722  | 16 | 7206983   | 7214387   | - |
| 10611 | 1417255_at   | Region | Wdtdc2        | 106633 | 17 | 153401    | 174334    | + |
| 10612 | 1420875_at   | Region | Ptk9          | 19230  | 15 | 94647782  | 94658539  | - |
| 10613 | 1417676_a_at | Region | Ptpro         | 19277  | 6  | 138044416 | 138255228 | + |
| 10614 | 1448851_a_at | Region | Dnajc5        | 13002  | 2  | 181237462 | 181269206 | + |
| 10615 | 1416546_a_at | Region | Rpl6          | 19988  | 5  | 120357217 | 120368957 | + |
| 10616 | 1420932_at   | Region | Mapk8         | 26419  | 14 | 31516453  | 31580724  | - |
| 10617 | 1435338_at   | Region | Cdk6          | 12571  | 5  | 3350317   | 3528230   | + |
| 10618 | 1434222_at   | Region | Sipa111       | 217692 | 12 | 79172130  | 79311045  | + |
| 10619 | 1419021_at   | Region | Mcf2          | 109904 | X  | 54810674  | 54902358  | - |
| 10620 | 1416021_a_at | Region | Fabp5         | 16592  | 3  | 10011881  | 10015886  | + |
| 10621 | 1424410_at   | Region | Ttc8          | 76260  | 12 | 94347654  | 94410409  | + |
| 10622 | 1421142_s_at | Region | Foxp1         | 108655 | 6  | 99395348  | 99630926  | - |
| 10623 | 1437298_at   | Region | 5730509C05Rik | 68524  | 11 | 98684896  | 98724607  | + |
| 10624 | 1417062_at   | Region | 2810037C14Rik | 67211  | 5  | 20098348  | 20114956  | + |
| 10625 | 1456098_a_at | Region | Elmo2         | 140579 | 2  | 164744764 | 164783212 | - |
| 10626 | 1453570_x_at | Region | Bet1l         | 54399  | 7  | 135255293 | 135258149 | - |
| 10627 | 1440970_at   | Region | None          | None   | 16 | 32777397  | 32778894  | - |
| 10628 | 1438060_at   | Region | Npas3         | 27386  | 12 | 50702581  | 50824492  | + |
| 10629 | 1450878_at   | Region | Sri           | 109552 | 5  | 8054494   | 8076270   | + |
| 10630 | 1428978_at   | Region | 2900009J20Rik | 72876  | 12 | 69644051  | 69646703  | + |
| 10631 | 1439396_x_at | Region | Gpd1          | 14555  | 15 | 99774809  | 99782224  | + |
| 10632 | 1417558_at   | Region | Fyn           | 14360  | 10 | 39440670  | 39635213  | + |
| 10633 | 1435731_x_at | Region | Stag1         | 20842  | 9  | 100545170 | 100860091 | + |
|       |              |        | Rps6 ///      |        |    |           |           |   |
|       |              |        | LOC214738 /// |        |    |           |           |   |
|       |              |        | LOC216036 /// |        |    |           |           |   |
|       |              |        | LOC236932 /// |        |    |           |           |   |
|       |              |        | LOC434404 /// |        |    |           |           |   |
| 10634 | 1437246_x_at | Region | LOC545640     | 20104  | 4  | 85840854  | 85843549  | - |
| 10635 | 1452444_at   | Region | Napb          | 17957  | 2  | 148151593 | 148189356 | - |
| 10636 | 1423288_s_at | Region | Cbln1         | 12404  | 8  | 86752336  | 86755765  | - |
| 10637 | 1418643_at   | Region | Tspan13       | 66109  | 12 | 32620734  | 32648498  | - |
| 10638 | 1436699_x_at | Region | Rpl18         | 19899  | 6  | 129003525 | 129004136 | + |
| 10639 | 1445804_at   | Region | 9630020C08Rik | 327819 | 10 | 109788315 | 110103340 | - |
| 10640 | 1439725_at   | Region | Ptptr         | 19281  | 2  | 160984592 | 162118116 | - |
| 10641 | 1436335_at   | Region | A930027K05Rik | 269615 | 4  | 153475739 | 153503344 | - |
| 10642 | 1429682_at   | Region | 4930431B09Rik | 74645  | 3  | 99897447  | 99915097  | - |
| 10643 | 1455661_at   | Region | None          | None   | 5  | 89665368  | 89665916  | + |
| 10644 | 1422517_a_at | Region | Znrd1         | 66136  | 17 | 34713862  | 34717932  | - |
| 10645 | 1428545_at   | Region | 0610007L01Rik | 71667  | 5  | 129392160 | 129415495 | + |
| 10646 | 1452351_at   | Region | C030027K23Rik | 77419  | 14 | 51170381  | 51181942  | + |
| 10647 | 1448392_at   | Region | Sparc         | 20692  | 11 | 55147342  | 55172707  | - |
| 10648 | 1435013_at   | Region | MGC60818      | 433956 | 5  | 138148281 | 138184566 | + |
| 10649 | 1420401_a_at | Region | Ramp3         | 56089  | 11 | 6553321   | 6572263   | + |
| 10650 | 1437450_x_at | Region | 2700060E02Rik | 68045  | 14 | 18174611  | 18186532  | - |
| 10651 | 1417174_at   | Region | 1810021J13Rik | 66279  | 9  | 37149795  | 37164750  | + |
| 10652 | 1437350_at   | Region | MGI:2179725   | 246257 | 11 | 74901601  | 74904466  | - |
| 10653 | 1424699_at   | Region | 4921511K06Rik | 232664 | 6  | 29443258  | 29474046  | + |
| 10654 | 1422845_at   | Region | Canx          | 12330  | 11 | 50047308  | 50078432  | - |
| 10655 | 1459151_x_at | Region | Ifi35         | 70110  | 11 | 101269568 | 101279549 | + |
| 10656 | 1448283_a_at | Region | Uble1b        | 50995  | 7  | 29294488  | 29322320  | - |
| 10657 | 1427427_at   | Region | None          | None   | 2  | 112254595 | 112259929 | - |

|       |              |        |               |        |    |           |           |   |
|-------|--------------|--------|---------------|--------|----|-----------|-----------|---|
| 10658 | 1458428_at   | Region | Kcnt1         | 227632 | 2  | 25848573  | 25849383  | + |
| 10659 | 1436849_x_at | Region | Gaa           | 14387  | 11 | 119089137 | 119106545 | + |
| 10660 | 1423592_at   | Region | Rock2         | 19878  | 12 | 16262121  | 16345038  | + |
| 10661 | 1426964_at   | Region | 3110003A17Rik | 73112  | 10 | 17935737  | 17974930  | - |
| 10662 | 1423803_s_at | Region | Gltscr2       | 68077  | 7  | 39        | 7752      | - |
| 10663 | 1420962_at   | Region | Hapln2        | 73940  | 3  | 87765928  | 87771304  | - |
| 10664 | 1423893_x_at | Region | Apbb1         | 11785  | 7  | 99670922  | 99693881  | - |
| 10665 | 1458440_at   | Region | Specc1        | 432572 | 11 | 61858013  | 61865361  | + |
| 10666 | 1454761_at   | Region | BC005764      | 216152 | 10 | 79987416  | 79997269  | - |
| 10667 | 1424348_at   | Region | 1110007A13Rik | 210711 | 7  | 122745901 | 122814730 | - |
| 10668 | 1431680_a_at | Region | Ptprk         | 19272  | 10 | 28105024  | 28627423  | + |
|       |              |        | Rpl29 ///     |        |    |           |           |   |
|       |              |        | LOC433350 /// |        |    |           |           |   |
| 10669 | 1436046_x_at | Region | LOC433941     | 19944  | 9  | 106423093 | 106425121 | + |
| 10670 | 1438706_at   | Region | 6430517E21Rik | 240843 | 1  | 158150731 | 158260041 | - |
| 10671 | 1421998_at   | Region | Tor3a         | 30935  | 1  | 156560153 | 156579875 | - |
| 10672 | 1436231_at   | Region | 2900052N01Rik | 73040  | 9  | 46937700  | 46938426  | + |
| 10673 | 1451140_s_at | Region | Prkag2        | 108099 | 5  | 23326651  | 23569979  | - |
| 10674 | 1424034_at   | Region | Rora          | 19883  | 9  | 69474948  | 69510983  | + |
| 10675 | 1456202_at   | Region | 6.33E+19      | 207393 | 15 | 78721307  | 78725742  | - |
| 10676 | 1418097_a_at | Region | Tslpr         | 57914  | 5  | 108635082 | 108641057 | - |
| 10677 | 1434158_at   | Region | Gmds          | 218138 | 13 | 31299208  | 31818166  | - |
| 10678 | 1449841_at   | Region | Kif3a         | 16568  | 11 | 53320244  | 53354795  | + |
| 10679 | 1455531_at   | Region | A930031D07Rik | 213006 | 1  | 131888602 | 131919751 | - |
| 10680 | 1435237_at   | Region | 2310009A05Rik | 66364  | 9  | 73172461  | 73175337  | + |
| 10681 | 1443964_at   | Region | Tmie          | 20776  | 9  | 110907343 | 110921380 | - |
| 10682 | 1438667_at   | Region | 5730410E15Rik | 319613 | 15 | 44706659  | 44733620  | - |
| 10683 | 1423399_a_at | Region | Yaf2          | 67057  | 15 | 93350109  | 93403125  | - |
| 10684 | 1416530_a_at | Region | Pnp           | 18950  | 14 | 46039165  | 46048052  | + |
| 10685 | 1418180_at   | Region | Sp1           | 20683  | 15 | 102466747 | 102493098 | + |
| 10686 | 1428573_at   | Region | Chn2          | 69993  | 6  | 54417146  | 54446135  | + |
| 10687 | 1420534_at   | Region | Gucy1a3       | 60596  | 3  | 81821497  | 81874847  | - |
| 10688 | 1435367_at   | Region | Mapk4         | 225724 | 18 | 74162718  | 74205506  | - |
| 10689 | 1451146_at   | Region | Zfp386        | 56220  | 12 | 111816578 | 111828697 | + |
| 10690 | 1416551_at   | Region | Atp2a2        | 11938  | 5  | 121605864 | 121654245 | - |
| 10691 | 1456953_at   | Region | None          | None   | 1  | 24502339  | 24503559  | - |
| 10692 | 1440999_at   | Region | Zfp697        | 242109 | 3  | 97868692  | 97916581  | + |
| 10693 | 1436719_at   | Region | Slc35f1       | 215085 | 10 | 52933079  | 53356820  | + |
| 10694 | 1448991_a_at | Region | Ina           | 226180 | 19 | 46566002  | 46575960  | + |
| 10695 | 1449506_a_at | Region | Eef1d         | 66656  | 15 | 75944869  | 75959409  | - |
| 10696 | 1419618_at   | Region | Bbox1         | 170442 | 2  | 109888870 | 109929512 | - |
| 10697 | 1416301_a_at | Region | Ebf1          | 13591  | 11 | 44370971  | 44758012  | + |
| 10698 | 1420388_at   | Region | Prss12        | 19142  | 3  | 122238559 | 122298307 | + |
| 10699 | 1449491_at   | Region | Card10        | 105844 | 15 | 78826422  | 78854328  | - |
| 10700 | 1434461_at   | Region | 2610041B18Rik | 69930  | 7  | 37370962  | 37388012  | - |
| 10701 | 1456527_at   | Region | Hecw1         | 94253  | 13 | 13672338  | 13968180  | - |
| 10702 | 1440132_s_at | Region | Prkar1b       | 19085  | 5  | 138015364 | 138127749 | - |
| 10703 | 1425539_a_at | Region | Rtn3          | 20168  | 19 | 7139746   | 7197134   | - |
| 10704 | 1455346_at   | Region | Masp1         | 17174  | 16 | 22233196  | 22304246  | - |
| 10705 | 1426328_a_at | Region | Scn3b         | 235281 | 9  | 40219687  | 40241396  | + |
| 10706 | 1426979_at   | Region | AW228700      | 100951 | 5  | 122617914 | 122629974 | + |
| 10707 | 1454814_s_at | Region | AU021838      | 328099 | 12 | 53961902  | 53972469  | + |
| 10708 | 1424403_a_at | Region | D5Bwg0860e    | 52822  | 5  | 87850046  | 87908952  | + |
| 10709 | 1427271_at   | Region | Btbd15        | 235132 | 9  | 30949477  | 30989044  | + |
| 10710 | 1454699_at   | Region | Sesn1         | 140742 | 10 | 42001833  | 42014167  | + |
| 10711 | 1434628_a_at | Region | Rhpn2         | 52428  | 7  | 30518501  | 30557703  | + |
| 10712 | 1427035_at   | Region | Slc39a14      | 213053 | 14 | 64619456  | 64667414  | - |
| 10713 | 1438705_at   | Region | Cbfa2t3h      | 12398  | 8  | 122011527 | 122080570 | - |
| 10714 | 1436586_x_at | Region | Rps14         | 20044  | 18 | 60999975  | 61003870  | + |
| 10715 | 1424065_at   | Region | Edem1         | 192193 | 6  | 109331841 | 109362540 | + |
| 10716 | 1449229_a_at | Region | Cdkl2         | 53886  | 5  | 91341903  | 91378846  | - |
| 10717 | 1454995_at   | Region | Ddah1         | 69219  | 3  | 144733606 | 144866062 | + |
| 10718 | 1417626_at   | Region | Usmg4         | 83679  | 3  | 97176102  | 97177020  | - |
| 10719 | 1441101_at   | Region | Hecw1         | 94253  | 13 | 13672338  | 13968180  | - |
| 10720 | 1422313_a_at | Region | Igfbp5        | 16011  | 1  | 73159719  | 73176568  | - |

|       |              |        |               |        |    |           |           |   |
|-------|--------------|--------|---------------|--------|----|-----------|-----------|---|
| 10721 | 1416023_at   | Region | Fabp3         | 14077  | 4  | 129335891 | 129342576 | + |
| 10722 | 1418399_at   | Region | Kctd9         | 105440 | 14 | 62244836  | 62270712  | + |
| 10723 | 1417919_at   | Region | Ppp1r7        | 66385  | 1  | 93171136  | 93195109  | + |
| 10724 | 1429579_at   | Region | 6330407118Rik | 70710  | 9  | 3808267   | 3809504   | + |
| 10725 | 1448260_at   | Region | Uchl1         | 22223  | 5  | 65441631  | 65452577  | + |
| 10726 | 1433720_s_at | Region | MGI:2143558   | 103172 | 10 | 76037313  | 76039474  | + |
| 10727 | 1456137_at   | Region | Nrxn3         | 18191  | 12 | 84906378  | 85735809  | + |
| 10728 | 1434727_at   | Region | 2900042E01Rik | 72927  | 9  | 37309145  | 37326635  | + |
| 10729 | 1422825_at   | Region | MGI:1351330   | 27220  | 13 | 96090664  | 96092548  | - |
| 10730 | 1436990_s_at | Region | MGI:2143558   | 103172 | 10 | 76037313  | 76039474  | + |
| 10731 | 1425266_a_at | Region | Rap1gds1      | 229877 | 3  | 137815145 | 137964306 | - |
| 10732 | 1436656_at   | Region | BC062109      | 231503 | 5  | 99096511  | 99178447  | - |
| 10733 | 1427946_s_at | Region | Dpyd          | 99586  | 3  | 117335295 | 118207632 | + |
| 10734 | 1433432_x_at | Region | Rps12         | 20042  | 10 | 58921849  | 58922343  | + |
| 10735 | 1451751_at   | Region | Ddit4l        | 73284  | 3  | 136513537 | 136518197 | + |
| 10736 | 1460644_at   | Region | Bckdk         | 12041  | 7  | 121953913 | 121958419 | + |
| 10737 | 1437455_a_at | Region | Btg1          | 12226  | 10 | 96594653  | 96597253  | + |
| 10738 | 1423824_at   | Region | 5031439A09Rik | 68151  | 3  | 4597      | 6180      | + |
| 10739 | 1420596_at   | Region | Cacng2        | 12300  | 15 | 78046913  | 78171273  | - |
| 10740 | 1420979_at   | Region | Pak1          | 18479  | 7  | 91889708  | 91958070  | + |
| 10741 | 1439313_at   | Region | Lphn3         | 319387 | 5  | 80275281  | 81049432  | + |
| 10742 | 1428669_at   | Region | Bmyc          | 107771 | 2  | 25638994  | 25640056  | + |
| 10743 | 1426324_at   | Region | H2-D1         | 14964  | 17 | 186801    | 249200    | - |
| 10744 | 1434315_at   | Region | 9130020G22Rik | 74552  | 4  | 134332771 | 134375796 | - |
| 10745 | 1427762_x_at | Region | Hist1h2bp     | 319188 | 13 | 21267579  | 21267959  | + |
| 10746 | 1428793_at   | Region | Slc36a1       | 215335 | 11 | 54957211  | 54986745  | + |
| 10747 | 1436691_x_at | Region | Prdx1         | 18477  | 4  | 115644504 | 115658905 | + |
| 10748 | 1423987_at   | Region | Cdc26         | 66440  | 4  | 61485774  | 61495742  | - |
| 10749 | 1442379_at   | Region | MGC99845      | 574403 | 11 | 34316333  | 34317435  | + |
| 10750 | 1448940_at   | Region | Trim21        | 20821  | 7  | 96666869  | 96674091  | - |
| 10751 | 1435547_at   | Region | None          | None   | 16 | 12152379  | 12153526  | + |
| 10752 | 1433505_a_at | Region | Lrrc5         | 231549 | 5  | 104762811 | 104877194 | + |
| 10753 | 1428895_at   | Region | 3222401M22Rik | 74013  | 1  | 55471318  | 55527941  | - |
| 10754 | 1415965_at   | Region | Scd1          | 20249  | 19 | 43938861  | 43951959  | - |
| 10755 | 1416204_at   | Region | Gpd1          | 14555  | 15 | 99774809  | 99782224  | + |
| 10756 | 1434741_at   | Region | None          | None   | 13 | 37473505  | 37474179  | + |
| 10757 | 1441636_at   | Region | ---           | 436334 | 16 | 4856428   | 4856935   | + |
| 10758 | 1427136_s_at | Region | Sfrs12        | 218543 | 13 | 99959715  | 99982622  | - |
| 10759 | 1417604_at   | Region | Camk1         | 52163  | 6  | 113901957 | 113911755 | - |
| 10760 | 1451415_at   | Region | 1810011O10Rik | 69068  | 8  | 23192443  | 23193773  | - |
| 10761 | 1421861_at   | Region | Clstn1        | 65945  | 4  | 148079000 | 148140261 | + |
| 10762 | 1428745_a_at | Region | 2310003L22Rik | 69487  | 2  | 139684883 | 139717485 | + |
| 10763 | 1456603_at   | Region | 1500005K14Rik | 76566  | 11 | 75744852  | 75746368  | - |
| 10764 | 1426615_s_at | Region | Ndrg4         | 234593 | 8  | 94984302  | 94996288  | + |
| 10765 | 1415800_at   | Region | Gja1          | 14609  | 10 | 56627159  | 56640230  | + |
| 10766 | 1452587_at   | Region | Actr2         | 66713  | 11 | 19957097  | 20007705  | - |
| 10767 | 1457670_s_at | Region | Lmna          | 16905  | 3  | 88225013  | 88247171  | - |
| 10768 | 1415790_at   | Region | BC002236      | 79560  | 11 | 44207410  | 44223282  | - |
| 10769 | 1434755_at   | Region | Coro2b        | 235431 | 9  | 62539533  | 62656961  | - |
| 10770 | 1426646_at   | Region | 9130011J15Rik | 66818  | 8  | 71716686  | 71721857  | - |
| 10771 | 1428081_at   | Region | Klhl21        | 242785 | 4  | 150500450 | 150510042 | + |
| 10772 | 1452213_at   | Region | Tex2          | 21763  | 11 | 106323228 | 106434019 | - |
| 10773 | 1439913_at   | Region | 1810053B01Rik | 75658  | 2  | 163506945 | 163507507 | + |
| 10774 | 1445297_at   | Region | None          | None   | 16 | 35929400  | 35930081  | - |
| 10775 | 1429290_at   | Region | Cbx6          | 494448 | 15 | 79878420  | 79886557  | - |
| 10776 | 1425519_a_at | Region | li            | 16149  | 18 | 61029204  | 61037978  | + |
| 10777 | 1451363_a_at | Region | 2010308M01Rik | 72121  | 3  | 106281879 | 106296871 | + |
| 10778 | 1417398_at   | Region | Rras2         | 66922  | 7  | 107899626 | 107913462 | - |
| 10779 | 1417569_at   | Region | Ncald         | 52589  | 15 | 37371112  | 37797344  | - |
| 10780 | 1450693_at   | Region | None          | None   | 10 | 4588459   | 4678958   | + |
| 10781 | 1435016_at   | Region | Als2cr3       | 70827  | 1  | 59205320  | 59251368  | - |
| 10782 | 1426929_at   | Region | Brunol4       | 108013 | 18 | 25707613  | 25982655  | - |
| 10783 | 1427887_at   | Region | 2610304G08Rik | 70470  | 2  | 157485763 | 157534289 | + |
| 10784 | 1450355_a_at | Region | Capg          | 12332  | 6  | 72878054  | 72896490  | + |
| 10785 | 1430136_at   | Region | Grm3          | 108069 | 5  | 9495848   | 9738738   | - |

|       |              |        |               |        |    |           |           |   |
|-------|--------------|--------|---------------|--------|----|-----------|-----------|---|
| 10786 | 1453129_a_at | Region | Rgs12         | 71729  | 5  | 33437125  | 33521273  | + |
| 10787 | 1418970_a_at | Region | Bcl10         | 12042  | 3  | 144898767 | 144908672 | + |
| 10788 | 1446421_at   | Region | Schip1        | 30953  | 3  | 68244719  | 68298773  | + |
| 10789 | 1450052_at   | Region | Kif2a         | 16563  | 13 | 103169548 | 103230223 | - |
| 10790 | 1452533_at   | Region | None          | None   | 2  | 112261367 | 112271614 | - |
| 10791 | 1453740_a_at | Region | Ccnl2         | 56036  | 4  | 154304851 | 154316905 | + |
|       |              |        | Rps12 ///     |        |    |           |           |   |
|       |              |        | LOC546370 /// |        |    |           |           |   |
|       |              |        | LOC546371 /// |        |    |           |           |   |
|       |              |        | LOC546372 /// |        |    |           |           |   |
| 10792 | 1416453_x_at | Region | LOC546373     | 20042  | 10 | 58921849  | 58922343  | + |
| 10793 | 1439284_at   | Region | E230025E14Rik | 320932 | 1  | 119296466 | 119297552 | - |
| 10794 | 1436251_at   | Region | Pde1c         | 18575  | 6  | 56226106  | 56506844  | - |
| 10795 | 1419922_s_at | Region | Atrnl1        | 226255 | 19 | 57196770  | 57719074  | + |
| 10796 | 1433826_at   | Region | AW212607      | 241732 | 2  | 152679307 | 152682319 | - |
| 10797 | 1450244_a_at | Region | Map4k2        | 26412  | 19 | 6130040   | 6142317   | + |
| 10798 | 1458501_at   | Region | Vapb          | 56491  | 2  | 173198044 | 173239833 | + |
| 10799 | 1450916_at   | Region | Stau2         | 29819  | 1  | 16527085  | 16558282  | - |
| 10800 | 1455591_at   | Region | None          | None   | 4  | 62228874  | 62230900  | + |
| 10801 | 1458602_at   | Region | Bbx           | 70508  | 16 | 49039981  | 49275616  | - |
| 10802 | 1421349_x_at | Region | 1500001H12Rik | 57754  | 7  | 135828437 | 135831408 | - |
| 10803 | 1457479_at   | Region | None          | None   | 1  | 72670519  | 72671275  | + |
| 10804 | 1428680_at   | Region | Cds1          | 74596  | 5  | 100785901 | 100844694 | + |
| 10805 | 1426485_at   | Region | Ubx2          | 67812  | 1  | 128087153 | 128120583 | + |
| 10806 | 1425468_at   | Region | Plp1          | 18823  | X  | 130367715 | 130382986 | + |
| 10807 | 1422589_at   | Region | Rab3a         | 19339  | 8  | 69909984  | 69913935  | + |
| 10808 | 1423455_at   | Region | Ptma          | 19231  | 1  | 86331905  | 86336327  | + |
| 10809 | 1437707_at   | Region | BC019561      | 225655 | 18 | 67695686  | 67710555  | + |
| 10810 | 1417071_s_at | Region | Cyp4v3        | 102294 | 8  | 44254051  | 44281445  | - |
| 10811 | 1430656_a_at | Region | 2210409M21Rik | 70396  | 1  | 53652158  | 53660213  | - |
| 10812 | 1451122_at   | Region | Idi1          | 319554 | 13 | 8843118   | 8849517   | + |
| 10813 | 1440147_at   | Region | Lgi2          | 246316 | 5  | 51348717  | 51377137  | - |
| 10814 | 1435754_at   | Region | D6Bwg1452e    | 242610 | 6  | 107189346 | 107259993 | - |
| 10815 | 1450875_at   | Region | Gpr37         | 14763  | 6  | 25712863  | 25735484  | - |
| 10816 | 1426501_a_at | Region | MGI:2182965   | 211550 | 3  | 126673949 | 126682478 | + |
| 10817 | 1433867_at   | Region | 1810030O07Rik | 69155  | X  | 10893824  | 10912486  | - |
| 10818 | 1456388_at   | Region | Atp11a        | 50770  | 8  | 12135859  | 12243808  | + |
| 10819 | 1439466_s_at | Region | C77604        | 231889 | 5  | 144178833 | 144186510 | + |
| 10820 | 1429004_at   | Region | Phip          | 83946  | 9  | 83198955  | 83305205  | - |
| 10821 | 1454653_at   | Region | A730016F12Rik | 211232 | 6  | 113845771 | 113872593 | + |
| 10822 | 1423250_a_at | Region | Tgfb2         | 21808  | 1  | 186121756 | 186210661 | - |
| 10823 | 1436274_at   | Region | None          | None   | 9  | 87528031  | 87528983  | + |
| 10824 | 1415740_at   | Region | Psmc5         | 19184  | 11 | 106077274 | 106084201 | + |
| 10825 | 1427185_at   | Region | Mef2a         | 17258  | 7  | 61121784  | 61125517  | - |
| 10826 | 1429126_at   | Region | 2600001M11Rik | 76531  | 2  | 5786620   | 5788325   | + |
| 10827 | 1428816_a_at | Region | Gata2         | 14461  | 6  | 88634163  | 88642525  | + |
| 10828 | 1425180_at   | Region | Sgip1         | 73094  | 4  | 101719268 | 101930082 | + |
| 10829 | 1435417_at   | Region | Al464131      | 329828 | 4  | 41634456  | 41641908  | - |
| 10830 | 1454691_at   | Region | Nrxn1         | 18189  | 17 | 87900413  | 88568779  | - |
| 10831 | 1416282_at   | Region | Psmc3         | 19182  | 2  | 90758831  | 90764177  | + |
| 10832 | 1421841_at   | Region | Fgfr3         | 14184  | 5  | 32210377  | 32225943  | + |
| 10833 | 1436265_at   | Region | 6330405H19    | 330153 | 5  | 107447072 | 107449021 | + |
| 10834 | 1421918_at   | Region | Anp32a        | 11737  | 9  | 62461464  | 62498838  | + |
| 10835 | 1455698_at   | Region | Tloc1         | 69276  | 3  | 30204876  | 30231459  | + |
| 10836 | 1425863_a_at | Region | Ptpro         | 19277  | 6  | 138044416 | 138255228 | + |
| 10837 | 1453837_at   | Region | 6330500D04Rik | 193385 | 13 | 24201506  | 24211957  | + |
| 10838 | 1416754_at   | Region | Prkar1b       | 19085  | 5  | 138015364 | 138127749 | - |
| 10839 | 1439808_at   | Region | A130090K04Rik | 320495 | 10 | 3616345   | 3617561   | + |
| 10840 | 1451349_at   | Region | BC020077      | 230500 | 4  | 98868481  | 98871688  | + |
| 10841 | 1434866_x_at | Region | Cpt1a         | 12894  | 19 | 3137883   | 3174426   | + |
| 10842 | 1452621_at   | Region | Pcbd2         | 72562  | 13 | 54343926  | 54393388  | + |
| 10843 | 1453003_at   | Region | Sorl1         | 20660  | 9  | 41927330  | 42082982  | - |
| 10844 | 1440153_at   | Region | ---           | 433045 | 16 | 84023320  | 84061591  | + |
| 10845 | 1453576_at   | Region | Nipbl         | 71175  | 15 | 8078809   | 8232047   | - |
| 10846 | 1417959_at   | Region | Pdlim7        | 67399  | 13 | 54123331  | 54129992  | - |

|       |              |        |                  |        |      |           |           |      |
|-------|--------------|--------|------------------|--------|------|-----------|-----------|------|
| 10847 | 1450931_at   | Region | Dock9            | 105445 | 14   | 116113166 | 116206323 | -    |
| 10848 | 1436797_a_at | Region | Surf4            | 20932  | 2    | 26852201  | 26866090  | -    |
| 10849 | 1443558_s_at | Region | C630002B14Rik    | 103466 | 10   | 86809415  | 86813050  | +    |
| 10850 | 1423265_at   | Region | Minpp1           | 17330  | 19   | 31811243  | 31840828  | +    |
| 10851 | 1424396_a_at | Region | Asrgl1           | 66514  | 19   | 8308266   | 8332113   | -    |
| 10852 | 1421845_at   | Region | Golph3           | 66629  | 15   | 12132755  | 12162746  | +    |
| 10853 | 1425620_at   | Region | Tgibr3           | 21814  | 5    | 106170128 | 106359608 | -    |
| 10854 | 1454858_x_at | Region | 3300001H21Rik    | 70152  | 15   | 100362355 | 100371886 | +    |
| 10855 | 1436709_at   | Region | C230096C10Rik    | 230866 | 4    | 138233859 | 138259973 | +    |
| 10856 | 1423078_a_at | Region | Sc4mol           | 66234  | 8    | 63787318  | 63802751  | -    |
| 10857 | 1445144_at   | Region | None             | None   | NONE | NONE      | NONE      | NONE |
| 10858 | 1443290_at   | Region | None             | None   | 9    | 35449110  | 35449758  | -    |
| 10859 | 1418983_at   | Region | Inadl            | 12695  | 4    | 97370899  | 97694676  | +    |
| 10860 | 1419719_at   | Region | Gabrb1           | 14400  | 5    | 70477380  | 70918453  | +    |
| 10861 | 1449383_at   | Region | Adssl1           | 11565  | 12   | 108099476 | 108120727 | +    |
| 10862 | 1451012_a_at | Region | Csda             | 56449  | 6    | 132143594 | 132167186 | -    |
| 10863 | 1448135_at   | Region | Atf4             | 11911  | 15   | 80308201  | 80310204  | +    |
| 10864 | 1425111_at   | Region | Sorcs3           | 66673  | 19   | 47757239  | 48356719  | +    |
|       |              |        | Cyp4f16 ///      |        |      |           |           |      |
| 10865 | 1430172_a_at | Region | LOC545195        | 545195 | 17   | 30453789  | 30500640  | +    |
| 10866 | 1426322_a_at | Region | Kcnmb2           | 72413  | 3    | 31314154  | 31608812  | +    |
| 10867 | 1438154_x_at | Region | 2610002J02Rik    | 67513  | 4    | 153742328 | 153749046 | +    |
| 10868 | 1457305_at   | Region | Btrc             | 12234  | 19   | 44911191  | 45076729  | +    |
| 10869 | 1424306_at   | Region | Elov14           | 83603  | 9    | 84108461  | 84135869  | -    |
| 10870 | 1429830_a_at | Region | Cd59a            | 12509  | 2    | 103800607 | 103820103 | +    |
| 10871 | 1456967_at   | Region | Trim66           | 330627 | 7    | 103304494 | 103346871 | -    |
| 10872 | 1437972_s_at | Region | Sf3b5            | 66125  | 10   | 12890149  | 12890854  | +    |
| 10873 | 1417359_at   | Region | Mfap2            | 17150  | 4    | 139891964 | 139897234 | +    |
| 10874 | 1433542_at   | Region | Inpp5f           | 101490 | 7    | 122660050 | 122745896 | +    |
| 10875 | 1426540_at   | Region | 2310067E08Rik    | 71946  | 9    | 14189509  | 14216547  | -    |
| 10876 | 1434487_at   | Region | Mef2d            | 17261  | 3    | 87886291  | 87912587  | +    |
| 10877 | 1442288_at   | Region | Anxa6            | 11749  | 11   | 54731952  | 54786255  | -    |
| 10878 | 1422550_a_at | Region | Mtap6            | 17760  | 7    | 93358278  | 93425764  | +    |
| 10879 | 1416824_at   | Region | B230118H07Rik    | 68170  | 2    | 101265464 | 101333669 | -    |
| 10880 | 1421190_at   | Region | Gabrb3           | 14402  | 7    | 51863803  | 52099137  | +    |
| 10881 | 1428478_at   | Region | 2700029E10Rik    | 72549  | 14   | 64861612  | 64864921  | +    |
| 10882 | 1451302_at   | Region | 1110012L19Rik    | 68618  | X    | 65054404  | 65057907  | +    |
| 10883 | 1427246_at   | Region | Magi1            | 14924  | 6    | 94131999  | 94737301  | -    |
| 10884 | 1418862_at   | Region | Echdc3           | 67856  | 2    | 6105737   | 6130266   | -    |
| 10885 | 1452894_at   | Region | Elavl4           | 15572  | 4    | 109165070 | 109310814 | -    |
| 10886 | 1460699_at   | Region | Rps27            | 57294  | 3    | 90023087  | 90024065  | -    |
| 10887 | 1422823_at   | Region | Eps8             | 13860  | 6    | 138270172 | 138331399 | -    |
| 10888 | 1446506_at   | Region | B930041G04       | 245643 | X    | 133926910 | 133939479 | +    |
| 10889 | 1417356_at   | Region | Peg3             | 18616  | 7    | 5909405   | 5933864   | -    |
| 10890 | 1439336_at   | Region | Tcf4             | 21413  | 18   | 69575005  | 69915006  | +    |
| 10891 | 1416013_at   | Region | Pld3             | 18807  | 7    | 22908314  | 22928711  | -    |
| 10892 | 1415713_a_at | Region | Ddx24            | 27225  | 12   | 98853463  | 98871260  | -    |
| 10893 | 1436674_at   | Region | D11Ertd333e      | 68066  | 11   | 102224234 | 102228559 | -    |
| 10894 | 1424710_a_at | Region | Gorasp2          | 70231  | 2    | 70359319  | 70389486  | +    |
| 10895 | 1423664_at   | Region | Qdpr             | 110391 | 5    | 44192821  | 44208924  | -    |
| 10896 | 1436201_x_at | Region | Mbp              | 17196  | 18   | 82642914  | 82753380  | +    |
| 10897 | 1424409_at   | Region | Cldn23           | 71908  | 8    | 34627798  | 34629616  | -    |
| 10898 | 1426851_a_at | Region | Nov              | 18133  | 15   | 54747888  | 54755722  | +    |
| 10899 | 1439779_at   | Region | None             | None   | 10   | 4684375   | 4685279   | +    |
| 10900 | 1417527_at   | Region | Ap3m2            | 64933  | 8    | 21541934  | 21560210  | -    |
| 10901 | 1429428_at   | Region | Tcf7l2           | 21416  | 19   | 55323190  | 55515901  | +    |
| 10902 | 1423406_at   | Region | Sv2a             | 64051  | 3    | 95669059  | 95683015  | +    |
| 10903 | 1418975_at   | Region | Nckipisd         | 80987  | 9    | 108854911 | 108864897 | +    |
| 10904 | 1434645_at   | Region | C530008M17Rik    | 320827 | 5    | 76085039  | 76117985  | +    |
| 10905 | 1456863_at   | Region | Epha4            | 13838  | 1    | 77656420  | 77802175  | -    |
| 10906 | 1438018_at   | Region | Hook1            | 77963  | 4    | 94942452  | 94999350  | +    |
| 10907 | 1429681_a_at | Region | Gpsn2            | 106529 | 8    | 82829225  | 82852112  | -    |
| 10908 | 1448595_a_at | Region | Rex3             | 19716  | X    | 129758911 | 129760452 | -    |
| 10909 | 1448232_x_at | Region | Tuba6            | 22146  | 15   | 99088281  | 99096040  | +    |
| 10910 | 1428394_at   | Region | Phyhd1 /// Lrrc8 | 227696 | 2    | 30198365  | 30214309  | +    |

|       |              |        |               |        |      |           |           |      |
|-------|--------------|--------|---------------|--------|------|-----------|-----------|------|
| 10911 | 1422503_s_at | Region | Parp1         | 11545  | 1    | 180523221 | 180555500 | +    |
| 10912 | 1451268_at   | Region | Tram111       | 229801 | 3    | 123116273 | 123118424 | +    |
| 10913 | 1420506_a_at | Region | Stxbp1        | 20910  | 2    | 32720124  | 32779288  | -    |
| 10914 | 1416097_at   | Region | Lrrc4         | 192198 | 6    | 28876498  | 28878711  | -    |
| 10915 | 1424603_at   | Region | Sumf1         | 58911  | 6    | 108608573 | 108687101 | -    |
| 10916 | 1444052_at   | Region | Flt4          | 14257  | 11   | 49362568  | 49405070  | +    |
| 10917 | 1422484_at   | Region | Cycs          | 13063  | 6    | 50708965  | 50711007  | -    |
| 10918 | 1450890_a_at | Region | Abi1          | 11308  | 2    | 22882346  | 22926763  | -    |
|       |              |        | Pabpc4 ///    |        |      |           |           |      |
| 10919 | 1421046_a_at | Region | LOC432881     | 230721 | 4    | 122310023 | 122325944 | +    |
| 10920 | 1417102_a_at | Region | Ndufb5        | 66046  | 3    | 32145242  | 32159738  | +    |
| 10921 | 1455927_x_at | Region | 2510027N19Rik | 67711  | 7    | 119517375 | 119541266 | -    |
| 10922 | 1416410_at   | Region | Pafah1b3      | 18476  | 7    | 20475289  | 20478195  | -    |
| 10923 | 1432273_a_at | Region | Dfy           | 13349  | 1    | 173267162 | 173268795 | -    |
| 10924 | 1436912_at   | Region | 3110038O15Rik | 73120  | 2    | 52362896  | 52364144  | -    |
| 10925 | 1423780_at   | Region | Hibadh        | 58875  | 6    | 52690560  | 52784625  | -    |
| 10926 | 1417539_at   | Region | Slc35a1       | 24060  | 4    | 34802324  | 34826420  | -    |
| 10927 | 1451308_at   | Region | Elov14        | 83603  | 9    | 84108461  | 84135869  | -    |
| 10928 | 1435525_at   | Region | Kctd17        | 72844  | 15   | 78479947  | 78489979  | +    |
| 10929 | 1455450_at   | Region | Ptpn3         | 19257  | 4    | 57182973  | 57243817  | -    |
| 10930 | 1426074_at   | Region | LOC434536     | 434536 | NONE | NONE      | NONE      | NONE |
| 10931 | 1433658_x_at | Region | Pcbp4         | 59092  | 9    | 106517872 | 106528323 | +    |
| 10932 | 1457072_at   | Region | Bcl11a        | 14025  | 11   | 23972907  | 24067984  | +    |
| 10933 | 1425780_a_at | Region | 0610041E09Rik | 66074  | 13   | 86207541  | 86225129  | +    |
| 10934 | 1435155_at   | Region | Cgn           | 70737  | 3    | 94247892  | 94274753  | -    |
| 10935 | 1430183_at   | Region | 4833414E09Rik | 71633  | 1    | 168354070 | 168355687 | -    |
| 10936 | 1458721_at   | Region | Pcdhga12      | 93724  | 18   | 37929594  | 37930793  | +    |
| 10937 | 1456798_at   | Region | 9330118A15Rik | 319756 | 4    | 25147424  | 25148239  | +    |
| 10938 | 1460343_at   | Region | Neurl         | 18011  | 19   | 46730295  | 46810735  | +    |
| 10939 | 1438729_at   | Region | Sox1          | 20664  | 8    | 11774868  | 11776043  | +    |
| 10940 | 1436393_a_at | Region | Trim37        | 68729  | 11   | 86855069  | 86948674  | +    |
| 10941 | 1455548_at   | Region | Dlgap4        | 228836 | 2    | 156157648 | 156219872 | +    |
| 10942 | 1433772_at   | Region | Stch          | 110920 | 16   | 74838985  | 74850259  | -    |
| 10943 | 1438868_at   | Region | D14Ertdd668e  | 219132 | 14   | 53883795  | 53900507  | -    |
| 10944 | 1423097_s_at | Region | Capn7         | 12339  | 14   | 29468562  | 29503108  | +    |
| 10945 | 1428666_at   | Region | Nars          | 70223  | 18   | 64732225  | 64749104  | -    |
| 10946 | 1415914_at   | Region | Hnrpab        | 15384  | 11   | 51352941  | 51359688  | -    |
| 10947 | 1442393_at   | Region | Zfxh1b        | 24136  | 2    | 44919283  | 45045178  | -    |
| 10948 | 1416844_at   | Region | Hrmt111       | 15468  | 10   | 76308969  | 76339515  | -    |
| 10949 | 1450259_a_at | Region | Stat5a        | 20850  | 11   | 100680491 | 100706256 | +    |
| 10950 | 1455796_x_at | Region | Olfm1         | 56177  | 2    | 28137838  | 28162624  | +    |
| 10951 | 1423630_at   | Region | Cygb          | 114886 | 11   | 116466688 | 116475406 | -    |
| 10952 | 1448298_at   | Region | Tnk2          | 51789  | 16   | 31477206  | 31491474  | +    |
| 10953 | 1455266_at   | Region | Kif5c         | 16574  | 2    | 49551476  | 49706940  | +    |
| 10954 | 1455594_at   | Region | Sec6l1        | 211446 | 13   | 70234117  | 70270772  | -    |
| 10955 | 1435854_at   | Region | Tmem10        | 226115 | 19   | 40607792  | 40621485  | -    |
| 10956 | 1437985_a_at | Region | 2310061I04Rik | 69662  | 17   | 33611840  | 33616255  | -    |
| 10957 | 1437188_at   | Region | Gabbr1        | 54393  | 17   | 34805575  | 34833793  | +    |
| 10958 | 1453373_at   | Region | 6330532G10Rik | 76162  | X    | 81401528  | 81403058  | -    |
| 10959 | 1451121_a_at | Region | Gltscr2       | 68077  | 7    | 39        | 7752      | -    |
| 10960 | 1448102_a_at | Region | Wdr61         | 66317  | 9    | 54834704  | 54852350  | -    |
| 10961 | 1451176_at   | Region | D430028G21Rik | 228607 | 2    | 130747991 | 130761878 | +    |
| 10962 | 1428431_at   | Region | 2310047A01Rik | 71918  | 14   | 24086842  | 24133887  | -    |
| 10963 | 1421192_a_at | Region | Itns1         | 16443  | 16   | 90939437  | 91069253  | +    |
| 10964 | 1443997_at   | Region | C130040D06Rik | 239031 | 14   | 32321209  | 32325379  | -    |
| 10965 | 1448411_at   | Region | Wfs1          | 22393  | 5    | 35472619  | 35495421  | -    |
| 10966 | 1418298_s_at | Region | Dpysl4        | 26757  | 7    | 133487649 | 133503345 | +    |
| 10967 | 1450012_x_at | Region | Ywhag         | 22628  | 5    | 134921901 | 134948016 | -    |
| 10968 | 1437236_a_at | Region | Zfp110        | 65020  | 7    | 10828742  | 10844258  | +    |
| 10969 | 1426658_x_at | Region | Phgdh         | 236539 | 3    | 97799380  | 97826178  | -    |
| 10970 | 1424929_a_at | Region | Trim26        | 22670  | 17   | 34551189  | 34619192  | +    |
| 10971 | 1435650_at   | Region | Hapln4        | 330790 | 8    | 69237391  | 69243833  | +    |
| 10972 | 1451053_a_at | Region | Mdm1          | 17245  | 10   | 117835760 | 117862925 | +    |
| 10973 | 1435246_at   | Region | Paqr8         | 74229  | 1    | 21115565  | 21163699  | +    |
| 10974 | 1448867_at   | Region | 2310004K06Rik | 56786  | 7    | 103588707 | 103605134 | -    |

|       |              |        |               |        |      |           |           |      |
|-------|--------------|--------|---------------|--------|------|-----------|-----------|------|
| 10975 | 1417472_at   | Region | Myh9          | 17886  | 15   | 77812545  | 77894062  | -    |
| 10976 | 1427915_s_at | Region | Tceb1         | 67923  | 1    | 16827250  | 16842139  | -    |
| 10977 | 1455570_x_at | Region | Cnn3          | 71994  | 3    | 120205773 | 120237098 | +    |
| 10978 | 1427900_at   | Region | Pip5k1l       | 227733 | 2    | 32507981  | 32515941  | +    |
| 10979 | 1435771_at   | Region | Plcb4         | 18798  | 2    | 135319401 | 135526921 | +    |
| 10980 | 1421018_at   | Region | 1110018J18Rik | 66129  | 13   | 61676644  | 61701775  | -    |
| 10981 | 1435509_x_at | Region | Cdk2ap1       | 13445  | 5    | 123516782 | 123525971 | -    |
| 10982 | 1415679_at   | Region | Psenen        | 66340  | 7    | 25974557  | 25975876  | -    |
| 10983 | 1429204_at   | Region | 2900075A18Rik | 73047  | 16   | 19391361  | 19393425  | -    |
| 10984 | 1455152_at   | Region | AI462493      | 107197 | 19   | 8076563   | 8077471   | -    |
| 10985 | 1449286_at   | Region | Ntng1         | 80883  | 3    | 109582822 | 109951623 | -    |
| 10986 | 1419169_at   | Region | Mapk6         | 50772  | 9    | 75524483  | 75535986  | -    |
| 10987 | 1426509_s_at | Region | Gfap          | 14580  | 11   | 102709766 | 102718169 | -    |
| 10988 | 1422772_at   | Region | C1galt1       | 94192  | 6    | 7821663   | 7848379   | +    |
| 10989 | 1423470_at   | Region | Ptbp2         | 56195  | 3    | 118493626 | 118557890 | -    |
| 10990 | 1416256_a_at | Region | Tubb5         | 22154  | 17   | 33552072  | 33555475  | -    |
| 10991 | 1455908_a_at | Region | Scsep1        | 74617  | 11   | 88745107  | 88776519  | -    |
| 10992 | 1448358_s_at | Region | Snrpg         | 68011  | 6    | 86805446  | 86812808  | +    |
| 10993 | 1439083_at   | Region | Ahi1          | 52906  | 10   | 20882283  | 21010464  | +    |
| 10994 | 1440628_at   | Region | None          | None   | NONE | NONE      | NONE      | NONE |
| 10995 | 1437332_at   | Region | None          | None   | 7    | 54789671  | 54790247  | -    |
| 10996 | 1429601_x_at | Region | 1110019K23Rik | 68621  | 5    | 90247014  | 90341747  | +    |
| 10997 | 1448602_at   | Region | Pygm          | 19309  | 19   | 6173218   | 6187146   | +    |
| 10998 | 1451099_at   | Region | Mbc2          | 23943  | 10   | 128247338 | 128262949 | -    |
| 10999 | 1426233_at   | Region | Map2k4        | 26398  | 11   | 65413894  | 65513947  | -    |
| 11000 | 1430667_at   | Region | Pcdh10        | 18526  | 3    | 44837486  | 44841910  | +    |
| 11001 | 1417125_at   | Region | Ahcy          | 269378 | 2    | 154516629 | 154531334 | -    |
| 11002 | 1452097_a_at | Region | Dusp7         | 235584 | 9    | 106362584 | 106369022 | +    |
| 11003 | 1460668_at   | Region | Gal           | 14419  | 19   | 3198611   | 3203151   | -    |
| 11004 | 1445549_at   | Region | None          | None   | 16   | 72127591  | 72128149  | +    |
| 11005 | 1433715_at   | Region | Cpne7         | 102278 | 8    | 122498738 | 122516463 | +    |
| 11006 | 1428490_at   | Region | C1galt1       | 94192  | 6    | 7821663   | 7848379   | +    |
| 11007 | 1418275_a_at | Region | Elf2          | 69257  | 3    | 50887633  | 50957953  | -    |
| 11008 | 1429475_at   | Region | 2810457I06Rik | 72828  | 9    | 40966047  | 41111032  | -    |
| 11009 | 1454941_at   | Region | Nmt1          | 18107  | 11   | 102849651 | 102887194 | +    |
| 11010 | 1421937_at   | Region | Dapp1         | 26377  | 3    | 136820534 | 136870453 | -    |
| 11011 | 1449158_at   | Region | Kcnk2         | 16526  | 1    | 188922773 | 189058672 | -    |
| 11012 | 1450871_a_at | Region | Bcat1         | 12035  | 6    | 145846706 | 145893811 | -    |
| 11013 | 1434143_at   | Region | BC060631      | 234776 | 8    | 116271705 | 116288863 | +    |
| 11014 | 1420376_a_at | Region | H3f3b         | 15081  | 11   | 115843386 | 115845593 | -    |
| 11015 | 1448216_at   | Region | Syngn3        | 20974  | 17   | 22489447  | 22494793  | -    |
| 11016 | 1438192_s_at | Region | Baz2a         | 116848 | 10   | 127845721 | 127863571 | +    |
| 11017 | 1440954_at   | Region | Pbx1          | 18514  | 1    | 168054563 | 168366387 | -    |
| 11018 | 1427320_at   | Region | LOC434002     | 434002 | 6    | 30844726  | 30846521  | +    |
| 11019 | 1438781_at   | Region | None          | None   | 3    | 132369443 | 132369959 | -    |
| 11020 | 1427344_s_at | Region | Rasd2         | 75141  | 8    | 74417802  | 74428505  | +    |
| 11021 | 1448578_at   | Region | Pafah1b1      | 18472  | 11   | 74399613  | 74450328  | -    |
| 11022 | 1459211_at   | Region | Gli2          | 14633  | 1    | 118586114 | 118804994 | -    |
| 11023 | 1435305_at   | Region | Ntrk2         | 18212  | 13   | 57448390  | 57572946  | +    |
| 11024 | 1417493_at   | Region | Bmi1          | 12151  | 2    | 18719028  | 18728639  | +    |
| 11025 | 1427875_a_at | Region | 1100001I22Rik | 68436  | 3    | 129657460 | 129660947 | -    |
| 11026 | 1421882_a_at | Region | Elavl2        | 15569  | 4    | 90225838  | 90375056  | -    |
| 11027 | 1428762_at   | Region | 4921526G09Rik | 66724  | X    | 80291582  | 80295111  | +    |
| 11028 | 1437920_at   | Region | Epha5         | 13839  | 5    | 83317214  | 83675897  | -    |
| 11029 | 1417540_at   | Region | Elf1          | 13709  | 14   | 73835241  | 73936523  | +    |
| 11030 | 1436155_at   | Region | Nmnat2        | 226518 | 1    | 152958285 | 153003745 | +    |
| 11031 | 1433545_s_at | Region | 5730439E10Rik | 102632 | 9    | 104041180 | 104105123 | +    |
| 11032 | 1436123_at   | Region | Bsn           | 12217  | 9    | 108169094 | 108256167 | -    |
| 11033 | 1440880_at   | Region | Mppe1         | 225651 | 18   | 67454864  | 67475164  | -    |
| 11034 | 1437796_at   | Region | None          | None   | 7    | 55059532  | 55060213  | -    |
| 11035 | 1438680_at   | Region | Auts2         | 319974 | 5    | 130627794 | 130728707 | -    |
| 11036 | 1445676_at   | Region | Kcnn2         | 140492 | 18   | 45780779  | 45906508  | +    |
| 11037 | 1448416_at   | Region | Mgp           | 17313  | 6    | 137644232 | 137647601 | -    |
| 11038 | 1452366_at   | Region | 4732435N03Rik | 234356 | 8    | 67505844  | 67884445  | -    |
| 11039 | 1435811_a_at | Region | Unc50         | 67387  | 1    | 37724660  | 37733461  | +    |

|                   |              |        |               |        |      |           |           |      |
|-------------------|--------------|--------|---------------|--------|------|-----------|-----------|------|
| 11040             | 1421087_at   | Region | Per3          | 18628  | 4    | 149497074 | 149536951 | -    |
| 11041             | 1418710_at   | Region | Cd59a         | 12509  | 2    | 103800607 | 103820103 | +    |
| 11042             | 1416508_at   | Region | Med28         | 66999  | 5    | 44279069  | 44284371  | +    |
| 11043             | 1448319_at   | Region | LOC432549     | 432549 | 11   | 40411477  | 40412835  | -    |
| 11044             | 1418453_a_at | Region | Atp1b1        | 11931  | 1    | 164355219 | 164376238 | -    |
| 11045             | 1455448_at   | Region | MGI:2677061   | 269060 | 19   | 9444161   | 9468085   | -    |
| 11046             | 1415778_at   | Region | Morf4I2       | 56397  | X    | 130277881 | 130286548 | -    |
| 11047             | 1434921_at   | Region | Nr2e1         | 21907  | 10   | 42668662  | 42690279  | -    |
| 11048             | 1418691_at   | Region | Rgs9          | 19739  | 11   | 109046444 | 109119218 | -    |
| 11049             | 1416061_at   | Region | Tbc1d15       | 66687  | 10   | 114883404 | 114937196 | -    |
| 11050             | 1425554_a_at | Region | Cdc16         | 69957  | 8    | 13147970  | 13160545  | +    |
| 2700060E02Rik /// |              |        |               |        |      |           |           |      |
| 11051             | 1435413_x_at | Region | LOC545536     | 545536 | 3    | 88320105  | 88321076  | -    |
| 11052             | 1422728_at   | Region | Inha          | 16322  | 1    | 75797800  | 75801077  | +    |
| 11053             | 1428211_at   | Region | 4933406E20Rik | 74443  | 9    | 108627920 | 108646375 | -    |
| 11054             | 1433693_x_at | Region | Vamp3         | 22319  | 4    | 149539667 | 149550315 | -    |
| 11055             | 1449319_at   | Region | MGI:2183426   | 192199 | 4    | 124013543 | 124036212 | +    |
| 11056             | 1436174_at   | Region | Atad2         | 70472  | 15   | 58103062  | 58128331  | -    |
| 11057             | 1416388_at   | Region | Pip5k2c       | 117150 | 10   | 126932905 | 126947384 | -    |
| 11058             | 1455544_at   | Region | Zranb3        | 226409 | 1    | 127796898 | 127945759 | -    |
| 11059             | 1423859_a_at | Region | Ptgds         | 19215  | 2    | 25398874  | 25401893  | -    |
| 11060             | 1419295_at   | Region | Creb31        | 26427  | 2    | 91687402  | 91728880  | -    |
| 11061             | 1417606_a_at | Region | Calr          | 12317  | 8    | 84108911  | 84113928  | -    |
| 11062             | 1418885_a_at | Region | Idh3b         | 170718 | 2    | 129793165 | 129798290 | -    |
| 11063             | 1423103_at   | Region | None          | None   | 3    | 94441939  | 94449078  | +    |
| 11064             | 1448383_at   | Region | Mmp14         | 17387  | 14   | 48948545  | 48958231  | +    |
| 11065             | 1450847_at   | Region | Ncbp2         | 68092  | 16   | 30758010  | 30767552  | +    |
| 11066             | 1454965_at   | Region | D430039N05Rik | 241520 | 2    | 83510477  | 83579107  | +    |
| 11067             | 1448888_at   | Region | Ppp1r7        | 66385  | 1    | 93171136  | 93195109  | +    |
| 11068             | 1436150_at   | Region | 1700066J24Rik | 76992  | 4    | 41656542  | 41657464  | -    |
| 11069             | 1421203_at   | Region | Chrna4        | 11438  | 2    | 180739269 | 180756135 | -    |
| 11070             | 1421072_at   | Region | Irx5          | 54352  | 8    | 91644914  | 91648574  | +    |
| 11071             | 1448593_at   | Region | Wispl         | 22402  | 15   | 66915598  | 66947404  | +    |
| 11072             | 1456785_at   | Region | Crsp2         | 26896  | X    | 10918689  | 11001013  | -    |
| 11073             | 1428782_a_at | Region | Uqcr1         | 22273  | 9    | 108982804 | 108996233 | +    |
| 11074             | 1446264_at   | Region | None          | None   | 2    | 6999433   | 7000004   | -    |
| 11075             | 1430514_a_at | Region | 2410026K10Rik | 66478  | NONE | NONE      | NONE      | NONE |
| 11076             | 1436992_x_at | Region | None          | None   | 2    | 88278097  | 88278289  | +    |
| 11077             | 1424268_at   | Region | Smox          | 228608 | 2    | 131005796 | 131039025 | +    |
| 11078             | 1456424_s_at | Region | Pltp          | 18830  | 2    | 164296251 | 164314349 | -    |
| 11079             | 1454888_at   | Region | Pfdn4         | 109054 | 2    | 170005161 | 170027799 | +    |
| 11080             | 1454868_at   | Region | D4Erd429e     | 230917 | 4    | 148217245 | 148230336 | -    |
| 11081             | 1449885_at   | Region | Tmem47        | 192216 | X    | 75731366  | 75757118  | +    |
| 11082             | 1418083_at   | Region | 0610009B22Rik | 66050  | 11   | 51438226  | 51441475  | -    |
| 11083             | 1417753_at   | Region | Pkd2          | 18764  | 5    | 103495425 | 103541936 | +    |
| 11084             | 1443179_at   | Region | None          | None   | 8    | 17432035  | 17432702  | -    |
| 11085             | 1457829_at   | Region | Clgn          | 12745  | 8    | 82637493  | 82683940  | +    |
| 11086             | 1419869_s_at | Region | Hdlbp         | 110611 | 1    | 93233431  | 93306299  | -    |
| 11087             | 1434671_at   | Region | B230337E12Rik | 98262  | 1    | 119403893 | 119407079 | -    |
| 11088             | 1448553_at   | Region | Myh7          | 140781 | 14   | 49487183  | 49511559  | -    |
| 11089             | 1443327_at   | Region | D130043K22Rik | 210108 | 13   | 24325012  | 24381147  | +    |
| 11090             | 1415743_at   | Region | Hdac5         | 15184  | 11   | 102016834 | 102045926 | -    |
| 11091             | 1420620_a_at | Region | Rnf13         | 24017  | 3    | 57378718  | 57475204  | +    |
| 11092             | 1428681_at   | Region | Gm608         | 207806 | 16   | 43107623  | 43110794  | +    |
| 11093             | 1428785_at   | Region | Amotl1        | 75723  | 9    | 14380306  | 14523126  | -    |
| 11094             | 1456595_x_at | Region | Gh            | 14599  | 11   | 106121357 | 106122899 | -    |
| 11095             | 1436661_at   | Region | Dpp10         | 269109 | 1    | 123096743 | 123812573 | -    |
| 11096             | 1451908_a_at | Region | Sec14l1       | 74136  | 11   | 116936342 | 116980314 | +    |
| 11097             | 1435867_at   | Region | None          | None   | 6    | 39272948  | 39274299  | -    |
| 11098             | 1455162_at   | Region | 4922503N01Rik | 230603 | 4    | 108366002 | 108403650 | +    |
| 11099             | 1421815_at   | Region | Epdr2         | 105298 | 13   | 19073208  | 19101305  | -    |
| 11100             | 1448943_at   | Region | Nrp1          | 18186  | 8    | 127666747 | 127814326 | +    |
| 11101             | 1421979_at   | Region | Phex          | 18675  | X    | 150819810 | 151014683 | -    |
| 11102             | 1455421_x_at | Region | Clcn1         | 12723  | 6    | 42430564  | 42458535  | +    |
| 11103             | 1460543_x_at | Region | Rpl37a        | 19981  | 1    | 73012971  | 73015366  | +    |



|       |              |        |                 |        |      |           |           |      |
|-------|--------------|--------|-----------------|--------|------|-----------|-----------|------|
| 11104 | 1416431_at   | Region | Tubb6           | 67951  | 18   | 67621399  | 67633418  | +    |
| 11105 | 1460206_at   | Region | Grasp           | 56149  | 15   | 101282359 | 101290906 | +    |
| 11106 | 1448321_at   | Region | Smoc1           | 64075  | 12   | 77888087  | 78047656  | +    |
| 11107 | 1426599_a_at | Region | Slc2a1          | 20525  | 4    | 118067673 | 118096232 | +    |
| 11108 | 1437290_at   | Region | 1110001C20Rik   | 242291 | 4    | 4691488   | 4720452   | -    |
| 11109 | 1418384_at   | Region | 9430083G14Rik   | 68117  | X    | 106733286 | 106771915 | +    |
| 11110 | 1448960_at   | Region | Cxxc5           | 67393  | 18   | 36053483  | 36085353  | +    |
| 11111 | 1455484_at   | Region | 2600009P04Rik   | 66572  | 9    | 21904794  | 21906812  | -    |
| 11112 | 1438112_at   | Region | 9430021M05Rik   | 77288  | NONE | NONE      | NONE      | NONE |
| 11113 | 1451155_at   | Region | Cugbp2          | 14007  | 2    | 6459141   | 6638885   | -    |
| 11114 | 1434228_at   | Region | Ppm2c           | 381511 | 4    | 11886768  | 11892786  | -    |
| 11115 | 1447683_x_at | Region | Mettl1          | 17299  | 10   | 126774651 | 126778180 | +    |
| 11116 | 1437259_at   | Region | Slc9a2          | 226999 | 1    | 41062726  | 41066386  | +    |
| 11117 | 1436529_at   | Region | Gpr123          | 52389  | 7    | 134230082 | 134274053 | +    |
| 11118 | 1436432_at   | Region | B230343J05Rik   | 320320 | 16   | 26942002  | 26943497  | -    |
| 11119 | 1455029_at   | Region | Kif21a          | 16564  | 15   | 90987323  | 91102467  | -    |
| 11120 | 1441253_at   | Region | Rfx3            | 19726  | 19   | 27008207  | 27251206  | -    |
| 11121 | 1421963_a_at | Region | Cdc25b          | 12531  | 2    | 130700932 | 130712318 | +    |
| 11122 | 1434593_at   | Region | Eif5a2          | 208691 | 3    | 28198695  | 28216230  | +    |
| 11123 | 1424873_at   | Region | Rnf2            | 19821  | 1    | 151325156 | 151356573 | -    |
| 11124 | 1448209_a_at | Region | Slc22a17        | 59049  | 14   | 49423568  | 49429642  | -    |
| 11125 | 1450738_at   | Region | Kif21a          | 16564  | 15   | 90987323  | 91102467  | -    |
| 11126 | 1440084_at   | Region | Al663975        | 103819 | 11   | 110343456 | 110344098 | +    |
| 11127 | 1426826_at   | Region | Rbm16           | 106583 | 17   | 3065810   | 3160145   | +    |
| 11128 | 1447883_x_at | Region | Map1lc3a        | 66734  | 2    | 154733401 | 154735007 | +    |
| 11129 | 1418575_at   | Region | Shfdg1          | 20422  | 6    | 6531045   | 6551349   | -    |
| 11130 | 1416669_s_at | Region | Naca            | 17938  | 10   | 127772283 | 127785343 | +    |
| 11131 | 1428922_at   | Region | 1200009O22Rik   | 66873  | 6    | 53959793  | 53965019  | -    |
| 11132 | 1428989_at   | Region | 0710001D07Rik   | 67679  | 17   | 28386340  | 28387472  | +    |
| 11133 | 1435028_at   | Region | Wdr7            | 104082 | 18   | 63940854  | 64221039  | +    |
| 11134 | 1435659_a_at | Region | Tpi1            | 21991  | 6    | 125467483 | 125471180 | -    |
| 11135 | 1424252_at   | Region | Hnrpd1          | 50926  | 5    | 99053360  | 99057516  | -    |
| 11136 | 1425195_a_at | Region | Acat2 /// Acat3 | 110460 | 17   | 11571688  | 11589509  | +    |
| 11137 | 1449832_at   | Region | 1700091H14Rik   | 73553  | 14   | 3946      | 5292      | +    |
| 11138 | 1455702_at   | Region | None            | None   | 12   | 77196560  | 77197213  | -    |
| 11139 | 1419365_at   | Region | Pex11a          | 18631  | 7    | 73535535  | 73541429  | -    |
| 11140 | 1421960_at   | Region | Adcy3           | 104111 | 12   | 3286276   | 3366296   | +    |
| 11141 | 1455334_at   | Region | C85843          | 97470  | NONE | NONE      | NONE      | NONE |
| 11142 | 1436047_at   | Region | Gm672           | 269037 | 18   | 75666390  | 75932739  | -    |
| 11143 | 1433672_at   | Region | 4732479N06Rik   | 215201 | X    | 127767894 | 127821879 | -    |
| 11144 | 1429218_at   | Region | Det1            | 76375  | 7    | 72619581  | 72639318  | -    |
| 11145 | 1420900_a_at | Region | Rab18           | 19330  | 18   | 60692     | 85718     | -    |
| 11146 | 1456765_at   | Region | 6430511F03      | 331475 | X    | 96686491  | 96687590  | +    |
| 11147 | 1436743_at   | Region | Igsf4d          | 239857 | 16   | 65672212  | 65964483  | -    |
| 11148 | 1451064_a_at | Region | Psat1           | 107272 | 19   | 15129232  | 15149125  | -    |
| 11149 | 1449942_a_at | Region | Ilk             | 16202  | 7    | 99851400  | 99857574  | +    |
| 11150 | 1424680_at   | Region | BB146404        | 103511 | 10   | 34152279  | 34157446  | -    |
| 11151 | 1460341_at   | Region | Plekhh2         | 226971 | 1    | 35119341  | 35148911  | +    |
| 11152 | 1416706_at   | Region | Rpe             | 66646  | 1    | 66993273  | 67012185  | +    |
| 11153 | 1415866_at   | Region | AW538196        | 101869 | 7    | 74125404  | 74140375  | -    |
| 11154 | 1434731_x_at | Region | Prdx1           | 18477  | 4    | 115644504 | 115658905 | +    |
| 11155 | 1422489_at   | Region | Gcs1            | 57377  | 6    | 83459195  | 83462587  | +    |
| 11156 | 1452456_at   | Region | Nrip2           | 60345  | 6    | 129089953 | 129098438 | +    |
| 11157 | 1431844_at   | Region | Kcnmb2          | 72413  | 3    | 31314154  | 31608812  | +    |
| 11158 | 1420537_at   | Region | Kctd4           | 67516  | 14   | 70297498  | 70307712  | +    |
| 11159 | 1452063_at   | Region | 2410081M15Rik   | 73680  | 4    | 128380745 | 128405141 | -    |
| 11160 | 1434476_at   | Region | Mect1           | 382056 | 8    | 69536831  | 69594238  | -    |
| 11161 | 1423134_at   | Region | BC003324        | 80291  | 5    | 123634608 | 123649578 | -    |
| 11162 | 1455061_a_at | Region | Acaa2           | 52538  | 18   | 75014405  | 75041400  | +    |
| 11163 | 1425660_at   | Region | Btbd3           | 228662 | 2    | 137792375 | 137798774 | +    |
| 11164 | 1422449_s_at | Region | Rcn2            | 26611  | 9    | 56150016  | 56166999  | +    |
| 11165 | 1426539_at   | Region | Usp11           | 236733 | X    | 18942872  | 18959479  | +    |
| 11166 | 1455482_at   | Region | Ap2a2           | 11772  | 7    | 135965073 | 136035847 | +    |
| 11167 | 1425733_a_at | Region | Eps8            | 13860  | 6    | 138270172 | 138331399 | -    |
| 11168 | 1426258_at   | Region | Sorl1           | 20660  | 9    | 41927330  | 42082982  | -    |

|       |              |        |               |        |      |           |           |      |
|-------|--------------|--------|---------------|--------|------|-----------|-----------|------|
| 11169 | 1429298_at   | Region | Ddah1         | 69219  | 3    | 144733606 | 144866062 | +    |
| 11170 | 1456899_at   | Region | 1500004F05Rik | 69765  | 8    | 39251081  | 39251595  | -    |
| 11171 | 1439291_at   | Region | None          | None   | 13   | 15451114  | 15451849  | -    |
| 11172 | 1452721_a_at | Region | 2900091E11Rik | 67282  | 10   | 88172924  | 88217989  | +    |
| 11173 | 1422155_at   | Region | Hist2h3c2     | 97114  | 3    | 95725948  | 95726959  | -    |
| 11174 | 1460223_a_at | Region | Epb4.9        | 13829  | 14   | 64919420  | 64946006  | -    |
| 11175 | 1443471_at   | Region | Zbtb20        | 56490  | 16   | 42442156  | 42491541  | +    |
| 11176 | 1454646_at   | Region | E430026E19Rik | 216198 | 10   | 84471607  | 84509015  | +    |
| 11177 | 1436803_a_at | Region | Ndufb9        | 66218  | 15   | 58944967  | 58950646  | +    |
| 11178 | 1416036_at   | Region | Fkbp1a        | 14225  | 2    | 150999557 | 151018627 | +    |
| 11179 | 1452127_a_at | Region | Ptpn13        | 19249  | 5    | 102496160 | 102633144 | +    |
| 11180 | 1437067_at   | Region | Phtf2         | 68770  | 5    | 19211339  | 19334596  | -    |
| 11181 | 1426877_a_at | Region | 2610016F04Rik | 66923  | 14   | 29151150  | 29207125  | +    |
| 11182 | 1455787_x_at | Region | Minpp1        | 17330  | 19   | 31811243  | 31840828  | +    |
| 11183 | 1457632_s_at | Region | Mrg1          | 17536  | 2    | 115376917 | 115578960 | -    |
| 11184 | 1457270_at   | Region | B230343A10Rik | 320013 | 11   | 67412906  | 67414641  | +    |
| 11185 | 1416236_a_at | Region | Eva1          | 14012  | 9    | 45031412  | 45042867  | +    |
| 11186 | 1423251_at   | Region | Luc7l2        | 192196 | 6    | 38687728  | 38745622  | +    |
| 11187 | 1448787_at   | Region | Moap1         | 64113  | 12   | 98187945  | 98204543  | -    |
| 11188 | 1426275_a_at | Region | Uxs1          | 67883  | 1    | 44044005  | 44123567  | +    |
| 11189 | 1437022_at   | Region | D130059P03Rik | 320538 | 6    | 38570159  | 38638809  | +    |
| 11190 | 1434360_s_at | Region | Ptprg         | 19270  | 14   | 10014966  | 10698138  | +    |
| 11191 | 1426873_s_at | Region | Jup           | 16480  | 11   | 100191706 | 100218826 | -    |
| 11192 | 1418530_at   | Region | Nup160        | 59015  | 2    | 90381964  | 90441077  | +    |
| 11193 | 1420760_s_at | Region | Ndr1          | 17990  | 15   | 66953527  | 66993826  | -    |
| 11194 | 1449615_s_at | Region | Hdlbp         | 110611 | 1    | 93233431  | 93306299  | -    |
| 11195 | 1454828_at   | Region | AI790205      | 277463 | 2    | 31084496  | 31148729  | +    |
| 11196 | 1449520_at   | Region | AI428795      | 209683 | 5    | 110273612 | 110336823 | +    |
| 11197 | 1440413_at   | Region | A830006F12Rik | 320460 | 1    | 71020647  | 71027097  | +    |
| 11198 | 1426899_at   | Region | 4930451A13Rik | 67581  | 16   | 56073492  | 56138746  | -    |
| 11199 | 1440565_at   | Region | Zbtb20        | 56490  | 16   | 42442156  | 42491541  | +    |
| 11200 | 1419361_at   | Region | Ss18          | 268996 | 18   | 14813890  | 14871175  | -    |
| 11201 | 1419646_a_at | Region | Mbp           | 17196  | 18   | 82642914  | 82753380  | +    |
| 11202 | 1416753_at   | Region | Prkar1b       | 19085  | 5    | 138015364 | 138127749 | -    |
| 11203 | 1422660_at   | Region | Rbm3          | 19652  | X    | 6379007   | 6384637   | -    |
| 11204 | 1421878_at   | Region | Mapk9         | 26420  | 11   | 49599595  | 49638939  | +    |
| 11205 | 1415897_a_at | Region | Mgst1         | 56615  | 6    | 138932495 | 138948710 | +    |
| 11206 | 1450120_at   | Region | Scn1a         | 20265  | 2    | 66128285  | 66206577  | -    |
| 11207 | 1450202_at   | Region | Grin1         | 14810  | 2    | 25224409  | 25251141  | -    |
| 11208 | 1456532_at   | Region | Pdgfd         | 71785  | 9    | 6119514   | 6328427   | +    |
| 11209 | 1428584_a_at | Region | Haghl         | 68977  | 17   | 23588825  | 23591333  | -    |
| 11210 | 1447275_at   | Region | Gm1805        | 241950 | 3    | 36783406  | 36785048  | +    |
| 11211 | 1417491_at   | Region | Ctsb          | 13030  | 14   | 57653056  | 57676512  | +    |
| 11212 | 1422429_at   | Region | Rnf14         | 56736  | 18   | 38520411  | 38541525  | +    |
| 11213 | 1435609_at   | Region | None          | None   | 2    | 120708685 | 120709340 | -    |
| 11214 | 1456609_at   | Region | 1810006K23Rik | 66259  | 4    | 137336512 | 137339406 | +    |
| 11215 | 1440229_at   | Region | 2310034G01Rik | 75579  | 19   | 45895538  | 45896325  | -    |
| 11216 | 1450147_at   | Region | Nptxr         | 73340  | 15   | 79841252  | 79857012  | -    |
| 11217 | 1457559_at   | Region | None          | None   | NONE | NONE      | NONE      | NONE |
| 11218 | 1434925_at   | Region | 4833424O15Rik | 75769  | 3    | 116349459 | 116463339 | +    |
| 11219 | 1434389_at   | Region | None          | None   | 17   | 78220202  | 78221847  | -    |
| 11220 | 1444235_at   | Region | None          | None   | 1    | 151769008 | 151770475 | -    |
| 11221 | 1456783_at   | Region | 9330107J05Rik | 319584 | 1    | 63606938  | 63607594  | +    |
| 11222 | 1449012_s_at | Region | Fndc4         | 64339  | 5    | 29751186  | 29753072  | -    |
| 11223 | 1431170_at   | Region | None          | None   | 3    | 89071108  | 89072915  | -    |
| 11224 | 1423966_at   | Region | Cd99l2        | 171486 | X    | 66088561  | 66161136  | -    |
| 11225 | 1417152_at   | Region | Btbd14a       | 67991  | 2    | 25991155  | 26054942  | -    |
| 11226 | 1417984_at   | Region | Ube2v2        | 70620  | 16   | 14321751  | 14363568  | -    |
| 11227 | 1423259_at   | Region | Id4           | 15904  | 13   | 47859485  | 47862094  | +    |
| 11228 | 1416711_at   | Region | Tbr1          | 21375  | 2    | 61659853  | 61669514  | +    |
| 11229 | 1449848_at   | Region | Gna14         | 14675  | 19   | 15659862  | 15834920  | +    |
| 11230 | 1434596_at   | Region | AU023766      | 101257 | 13   | 50239213  | 50239730  | -    |
| 11231 | 1421870_at   | Region | Trim44        | 80985  | 2    | 102009026 | 102105530 | -    |
| 11232 | 1427523_at   | Region | Six3          | 20473  | 17   | 83450633  | 83453317  | +    |
| 11233 | 1417115_at   | Region | Map3k12       | 26404  | 15   | 102558068 | 102565989 | -    |

|       |              |        |               |        |    |           |           |   |
|-------|--------------|--------|---------------|--------|----|-----------|-----------|---|
| 11234 | 1436438_s_at | Region | None          | None   | 12 | 77196560  | 77197213  | - |
| 11235 | 1433879_a_at | Region | C130032J12Rik | 218975 | 14 | 42383095  | 42408162  | + |
| 11236 | 1437101_at   | Region | Lats2         | 50523  | 14 | 52225857  | 52269062  | - |
| 11237 | 1427061_at   | Region | Rbbp8         | 225182 | 18 | 11845010  | 11930602  | + |
| 11238 | 1447364_x_at | Region | Myo1b         | 17912  | 1  | 52050933  | 52208258  | - |
| 11239 | 1441127_at   | Region | None          | None   | X  | 61329124  | 61329999  | + |
| 11240 | 1416150_a_at | Region | Sfrs3         | 20383  | 17 | 26839644  | 26846716  | + |
| 11241 | 1430024_at   | Region | A430107J06Rik | 77929  | X  | 93539141  | 93548434  | + |
| 11242 | 1437099_x_at | Region | Hnrpf         | 98758  | 6  | 118349909 | 118358058 | + |
| 11243 | 1443954_at   | Region | Rad18         | 58186  | 6  | 113184164 | 113259954 | - |
| 11244 | 1422946_a_at | Region | Dnmt1         | 13433  | 9  | 20784243  | 20829937  | - |
| 11245 | 1425161_a_at | Region | 5730502D15Rik | 67976  | 15 | 89127929  | 89138928  | + |
| 11246 | 1455418_at   | Region | None          | None   | 10 | 53518544  | 53519695  | - |
| 11247 | 1429586_at   | Region | 4930558N01Rik | 75840  | 7  | 92747445  | 92749195  | + |
| 11248 | 1417637_a_at | Region | Hmg20b        | 15353  | 10 | 81481529  | 81485887  | - |
| 11249 | 1424676_s_at | Region | Sec14l4       | 103655 | 11 | 3926569   | 3942810   | + |
| 11250 | 1452728_at   | Region | Kirrel3       | 67703  | 9  | 34948894  | 34950352  | + |
| 11251 | 1441722_at   | Region | Rnpc2         | 170791 | 2  | 155604575 | 155637077 | - |
| 11252 | 1445473_at   | Region | LOC544932     | 544932 | 13 | 51063134  | 51091231  | - |
| 11253 | 1417691_at   | Region | Bin3          | 57784  | 14 | 64416073  | 64454195  | + |
| 11254 | 1425403_at   | Region | Dnm3          | 103967 | 1  | 161896669 | 162387092 | - |
| 11255 | 1436159_at   | Region | Usp32         | 237898 | 11 | 84712435  | 84833928  | - |
| 11256 | 1434813_x_at | Region | Wars          | 22375  | 12 | 104331027 | 104364190 | - |
| 11257 | 1449303_at   | Region | Sesn3         | 75747  | 9  | 14111292  | 14161413  | + |
| 11258 | 1419606_a_at | Region | Tnnt1         | 21955  | 7  | 3735769   | 3759685   | - |
| 11259 | 1454867_at   | Region | LOC433938     | 433938 | 5  | 110439114 | 110506716 | + |
| 11260 | 1451125_at   | Region | BC017133      | 232164 | 6  | 84150399  | 84175677  | - |
| 11261 | 1445862_at   | Region | BC031575      | 223989 | 16 | 12874640  | 12899363  | - |
| 11262 | 1417430_at   | Region | Cdr2          | 12585  | 7  | 114832607 | 114857851 | - |
| 11263 | 1429097_at   | Region | C030044C12Rik | 77483  | 8  | 82331940  | 82333406  | + |
| 11264 | 1460580_at   | Region | Pcnx          | 54604  | 12 | 78720867  | 78861705  | + |
| 11265 | 1448399_at   | Region | Tax1bp1       | 52440  | 6  | 52858073  | 52910809  | + |
| 11266 | 1456981_at   | Region | Tmc7          | 209760 | 7  | 112411701 | 112460543 | - |
| 11267 | 1420559_a_at | Region | Shox2         | 20429  | 3  | 66645577  | 66654082  | - |
| 11268 | 1418750_at   | Region | LOC546318 /// |        |    |           |           |   |
| 11268 | 1418750_at   | Region | LOC547400     | 546318 | X  | 68417758  | 68433166  | + |
| 11269 | 1435382_at   | Region | Ndn           | 17984  | 7  | 56122085  | 56123665  | + |
| 11270 | 1423160_at   | Region | Spred1        | 114715 | 2  | 116635298 | 116693185 | + |
| 11271 | 1438376_s_at | Region | Trim27        | 19720  | 13 | 20660436  | 20672921  | + |
| 11272 | 1425011_x_at | Region | Stx18         | 71116  | 5  | 36545458  | 36643042  | + |
| 11273 | 1421255_a_at | Region | Cabp1         | 29867  | 5  | 114278572 | 114295747 | - |
| 11274 | 1437137_at   | Region | 6430550H21Rik | 245386 | X  | 32718102  | 32773193  | - |
| 11275 | 1458813_at   | Region | Scn5a         | 20271  | 9  | 119479491 | 119556933 | - |
| 11276 | 1455723_at   | Region | D1Ert448e     | 52318  | 1  | 34717260  | 34718860  | + |
| 11277 | 1422868_s_at | Region | Gda           | 14544  | 19 | 20622929  | 20710514  | - |
| 11278 | 1455520_at   | Region | Ppp2r5c       | 26931  | 12 | 105961123 | 106055786 | + |
| 11279 | 1417143_at   | Region | Edg2          | 14745  | 4  | 58378433  | 58496968  | - |
| 11280 | 1448807_at   | Region | Hrh3          | 99296  | 2  | 179816431 | 179821182 | - |
| 11281 | 1427306_at   | Region | Ryr1          | 20190  | 7  | 24409764  | 24534347  | - |
| 11282 | 1442418_at   | Region | B930096F20Rik | 319332 | 19 | 7943380   | 7944071   | + |
| 11283 | 1448765_at   | Region | Fyn           | 14360  | 10 | 39440670  | 39635213  | + |
| 11284 | 1449110_at   | Region | Rhob          | 11852  | 12 | 7813873   | 7816100   | - |
| 11285 | 1458742_at   | Region | Lphn3         | 319387 | 5  | 80275281  | 81049432  | + |
| 11286 | 1436984_at   | Region | Abi2          | 329165 | 1  | 60713087  | 60784447  | + |
| 11287 | 1452353_at   | Region | Gpr155        | 68526  | 2  | 73039256  | 73084321  | - |
| 11288 | 1438496_a_at | Region | 6330505F04Rik | 236790 | X  | 51209591  | 51262553  | + |
| 11289 | 1460674_at   | Region | Paqr7         | 71904  | 4  | 133457881 | 133469713 | + |
| 11290 | 1448501_at   | Region | Tspan6        | 56496  | X  | 127436007 | 127443302 | - |
| 11291 | 1426818_at   | Region | Arrdc4        | 66412  | 7  | 62625680  | 62633272  | - |
| 11292 | 1446190_at   | Region | Dcamk1        | 13175  | 3  | 54876964  | 55171014  | + |
| 11293 | 1418332_a_at | Region | Agtpbp1       | 67269  | 13 | 58109493  | 58216884  | - |
| 11294 | 1420858_at   | Region | Pkia          | 18767  | 3  | 7341242   | 7419938   | + |
| 11295 | 1452771_s_at | Region | Acsl3         | 74205  | 1  | 78992139  | 79040786  | + |
| 11296 | 1452653_at   | Region | Slc25a22      | 68267  | 7  | 135831740 | 135839606 | - |
| 11297 | 1434088_at   | Region | Zfp496        | 268417 | 11 | 59211191  | 59231540  | - |

|       |              |        |        |        |    |           |           |   |
|-------|--------------|--------|--------|--------|----|-----------|-----------|---|
| 11298 | 1421193_a_at | Region | Pbx3   | 18516  | 2  | 34104071  | 34304198  | - |
| 11299 | 1438670_at   | Region | Ptpn1  | 19246  | 2  | 167396315 | 167485652 | + |
| 11300 | 1422431_at   | Region | Magee1 | 107528 | X  | 99721786  | 99725292  | + |
| 11301 | 1416780_at   | Region | Pfkm   | 18642  | 15 | 98187678  | 98208013  | + |
| 11302 | 1423363_at   | Region | Sort1  | 20661  | 3  | 108079874 | 108157253 | + |
| 11303 | 1415804_at   | Region | Cx3cl1 | 20312  | 8  | 94056398  | 94066599  | + |
| 11304 | 1450990_at   | Region | Gpc3   | 14734  | X  | 46793222  | 47134717  | - |
| 11305 | 1438651_a_at | Region | Agtrl1 | 23796  | 2  | 84834149  | 84837672  | + |

#### Hist1h4d /// Hist1h4j

|       |              |        |               |        |    |           |           |   |
|-------|--------------|--------|---------------|--------|----|-----------|-----------|---|
| 11306 | 1431658_at   | Region | /// Hist1h4k  | 319156 | 13 | 23061479  | 23061790  | + |
| 11307 | 1448402_at   | Region | Tln1          | 21894  | 4  | 43447441  | 43472672  | - |
| 11308 | 1426032_at   | Region | Nfatc2        | 18019  | 2  | 167988261 | 168098994 | - |
| 11309 | 1439443_x_at | Region | Tkt           | 21881  | 14 | 28683743  | 28709316  | + |
| 11310 | 1438641_x_at | Region | 1500016O10Rik | 68952  | 7  | 120873047 | 120879946 | + |
| 11311 | 1428400_at   | Region | 2200002K05Rik | 69137  | 9  | 15076342  | 15096777  | + |
| 11312 | 1455037_at   | Region | Plxna2        | 18845  | 1  | 194358488 | 194552987 | + |
| 11313 | 1436062_at   | Region | Arcn1         | 213827 | 9  | 44730423  | 44756652  | - |
| 11314 | 1449412_at   | Region | 1810046J19Rik | 103742 | 11 | 98258812  | 98260057  | - |
| 11315 | 1434333_a_at | Region | Prkd2         | 101540 | 7  | 13794089  | 13821505  | + |
| 11316 | 1434677_at   | Region | Hps5          | 246694 | 7  | 40845814  | 40881026  | - |
| 11317 | 1445929_at   | Region | Kcnk2         | 16526  | 1  | 188922773 | 189058672 | - |
| 11318 | 1438054_x_at | Region | Ppp2r2c       | 269643 | 5  | 35375082  | 35461590  | + |
| 11319 | 1428288_at   | Region | 2310051E17Rik | 70273  | 19 | 22403452  | 22406756  | + |
| 11320 | 1433554_at   | Region | AU022870      | 231874 | 5  | 143029522 | 143056466 | - |
| 11321 | 1455096_at   | Region | None          | None   | 12 | 91195053  | 91195851  | + |

#### Hk1 /// Rpl17 ///

LOC432963 ///

LOC545252 ///

|       |              |        |               |        |    |           |           |   |
|-------|--------------|--------|---------------|--------|----|-----------|-----------|---|
| 11322 | 1436822_x_at | Region | LOC545379     | 15275  | 10 | 62236465  | 62346218  | - |
| 11323 | 1439455_x_at | Region | Capza1        | 12340  | 3  | 104249759 | 104291308 | - |
| 11324 | 1438855_x_at | Region | Tnfaip2       | 21928  | 12 | 106918353 | 106928408 | + |
| 11325 | 1443546_at   | Region | Hdlbp         | 110611 | 1  | 93233431  | 93306299  | - |
| 11326 | 1444025_at   | Region | None          | None   | 2  | 55522400  | 55523103  | + |
| 11327 | 1446532_at   | Region | None          | None   | 15 | 92957497  | 92958118  | - |
| 11328 | 1457726_at   | Region | Rps15a        | 267019 | 7  | 111980231 | 111992004 | - |
| 11329 | 1434388_at   | Region | Mobkl2a       | 208228 | 10 | 80817003  | 80833604  | - |
| 11330 | 1417612_at   | Region | Ier5          | 15939  | 1  | 154988211 | 154990321 | - |
| 11331 | 1453372_at   | Region | Dnajc1        | 13418  | 2  | 18259145  | 18434517  | - |
| 11332 | 1416584_at   | Region | Man2b2        | 17160  | 5  | 35313433  | 35337139  | - |
| 11333 | 1417892_a_at | Region | Sirt3         | 64384  | 7  | 135265552 | 135284193 | - |
| 11334 | 1417627_a_at | Region | Limk1         | 16885  | 5  | 133669544 | 133702806 | - |
| 11335 | 1438040_a_at | Region | Tra1          | 22027  | 10 | 86665503  | 86680106  | - |
| 11336 | 1426678_at   | Region | 3110006P09Rik | 68036  | 15 | 36999940  | 37010315  | - |
| 11337 | 1454964_at   | Region | BC021395      | 225283 | 18 | 24716439  | 24758615  | - |
| 11338 | 1415876_a_at | Region | Rps26         | 27370  | 10 | 128361626 | 128363573 | - |
| 11339 | 1433605_at   | Region | Inpp5a        | 212111 | 7  | 133784822 | 133975505 | + |
| 11340 | 1437772_s_at | Region | Fuca1         | 71665  | 4  | 134802014 | 134821570 | + |
| 11341 | 1456944_at   | Region | C230009H10Rik | 320399 | 7  | 40517772  | 40518700  | + |
| 11342 | 1439235_x_at | Region | Tm2d2         | 69742  | 8  | 23740385  | 23746364  | + |
| 11343 | 1429166_s_at | Region | Clmn          | 94040  | 12 | 100215893 | 100309212 | - |
| 11344 | 1417140_a_at | Region | Ptpn2         | 19255  | 18 | 67896299  | 67955363  | - |
| 11345 | 1446048_at   | Region | Cdh11         | 12552  | 8  | 101922774 | 102074855 | - |
| 11346 | 1425753_a_at | Region | Ung           | 22256  | 5  | 113241844 | 113249965 | + |
| 11347 | 1434268_at   | Region | Adar          | 56417  | 3  | 89536967  | 89557589  | + |
| 11348 | 1418062_at   | Region | Eef1a2        | 13628  | 2  | 180864650 | 180873972 | - |
| 11349 | 1417688_at   | Region | BC004044      | 80752  | 5  | 137753158 | 137808121 | + |
| 11350 | 1447922_at   | Region | Stxbp5l       | 207227 | 16 | 35953363  | 36204390  | - |
| 11351 | 1418412_at   | Region | Tpd52l1       | 21987  | 10 | 31372578  | 31486119  | - |
| 11352 | 1457944_at   | Region | Etv6          | 14011  | 6  | 134792559 | 135023343 | + |
| 11353 | 1457736_at   | Region | Wbscr24       | 194309 | 5  | 134086393 | 134091758 | - |
| 11354 | 1448221_at   | Region | Bat1a         | 53817  | 17 | 32946813  | 32958600  | + |
|       |              |        | Dph2l1 ///    |        |    |           |           |   |
| 11355 | 1418335_a_at | Region | MGI:2179725   | 116905 | 11 | 74903301  | 74916132  | - |
| 11356 | 1438151_x_at | Region | Zdhhc14       | 224454 | 17 | 5400177   | 5659646   | + |

|       |              |        |               |        |    |           |           |   |
|-------|--------------|--------|---------------|--------|----|-----------|-----------|---|
| 11357 | 1422453_at   | Region | Prpf8         | 192159 | 11 | 75212748  | 75235041  | + |
| 11358 | 1434185_at   | Region | Acaca         | 107476 | 11 | 84127739  | 84129644  | + |
| 11359 | 1440041_at   | Region | Tgfb3         | 21814  | 5  | 106170128 | 106359608 | - |
| 11360 | 1453113_at   | Region | Wdsub1        | 72137  | 2  | 59707764  | 59737984  | - |
| 11361 | 1451366_at   | Region | Cops6         | 26893  | 5  | 137133910 | 137136792 | + |
| 11362 | 1455128_x_at | Region | Tnrc6a        | 233833 | 7  | 117180427 | 117250357 | + |
| 11363 | 1426376_at   | Region | Dp1           | 13476  | 18 | 34567907  | 34596351  | - |
| 11364 | 1419274_at   | Region | C80913        | 19777  | 7  | 33124913  | 33183548  | - |
| 11365 | 1439889_at   | Region | Scn8a         | 20273  | 15 | 100993863 | 101098226 | + |
| 11366 | 1426788_a_at | Region | Ssrp1         | 20833  | 2  | 84735021  | 84744858  | + |
| 11367 | 1451714_a_at | Region | Map2k3        | 26397  | 11 | 60657699  | 60678445  | + |
| 11368 | 1454914_at   | Region | 2610101N10Rik | 67958  | 9  | 95369771  | 95420790  | - |
| 11369 | 1419358_at   | Region | Sorcs2        | 81840  | 5  | 34504743  | 34885854  | - |
| 11370 | 1420906_at   | Region | Cd2ap         | 12488  | 17 | 40292779  | 40376218  | - |
| 11371 | 1444790_at   | Region | 1810005K13Rik | 66255  | 18 | 80353999  | 80360382  | - |
| 11372 | 1437738_at   | Region | Atp2c1        | 235574 | 9  | 105393471 | 105477208 | - |
| 11373 | 1451036_at   | Region | Spg21         | 27965  | 9  | 65583236  | 65609720  | + |
| 11374 | 1427138_at   | Region | 0610010D24Rik | 68339  | 12 | 96358158  | 96474441  | - |
| 11375 | 1427044_a_at | Region | Amph          | 218038 | 13 | 18423821  | 18627334  | + |
| 11376 | 1434707_at   | Region | Sbf1          | 77980  | 15 | 89339395  | 89368172  | - |
| 11377 | 1417365_a_at | Region | Calm1         | 12313  | 12 | 95642228  | 95652493  | + |
| 11378 | 1417793_at   | Region | Ilgp2         | 54396  | 11 | 57925267  | 57948404  | + |
| 11379 | 1451286_s_at | Region | Fus           | 233908 | 7  | 122017364 | 122031841 | + |
| 11380 | 1423695_at   | Region | 9530090G24Rik | 108687 | 2  | 155158964 | 155186323 | - |
| 11381 | 1455976_x_at | Region | Dbi           | 13167  | 1  | 119870842 | 119878615 | - |
| 11382 | 1439293_at   | Region | C130047D21Rik | 320861 | 9  | 75161369  | 75161936  | + |
| 11383 | 1449981_a_at | Region | Nat2          | 17961  | 8  | 66602080  | 66609702  | + |
| 11384 | 1448992_at   | Region | Ina           | 226180 | 19 | 46566002  | 46575960  | + |
| 11385 | 1455031_at   | Region | None          | None   | 10 | 40559347  | 40560722  | + |
| 11386 | 1448673_at   | Region | Pvrl3         | 58998  | 16 | 45281022  | 45382981  | - |
| 11387 | 1421790_a_at | Region | Kcnab3        | 16499  | 11 | 69051916  | 69058699  | + |
| 11388 | 1435937_at   | Region | Sptlc2        | 20773  | 12 | 84187587  | 84267928  | - |
| 11389 | 1441087_at   | Region | 2810011L19Rik | 69952  | 12 | 100827808 | 100828069 | + |
| 11390 | 1418067_at   | Region | Cfl2          | 12632  | 12 | 51564268  | 51568328  | - |
| 11391 | 1439586_at   | Region | LOC548102     | 548102 | 16 | 42437719  | 42438534  | + |
| 11392 | 1448217_a_at | Region | Rpl27         | 19942  | 11 | 101263502 | 101266620 | + |
| 11393 | 1439042_at   | Region | Adcyap1r1     | 11517  | 6  | 55596313  | 55643230  | + |
| 11394 | 1431812_a_at | Region | Slc6a9        | 14664  | 4  | 116794241 | 116828210 | + |
| 11395 | 1452055_at   | Region | Ctdsp1        | 227292 | 1  | 74694064  | 74699752  | + |
| 11396 | 1425691_at   | Region | B3gat1        | 76898  | 9  | 26645461  | 26655237  | + |
| 11397 | 1417743_at   | Region | Clk2          | 12748  | 3  | 88921556  | 88933062  | + |
| 11398 | 1460566_at   | Region | LOC545454     | 545454 | 2  | 120820915 | 120822007 | + |
| 11399 | 1423196_at   | Region | Nedd1         | 17997  | 10 | 92653242  | 92690856  | - |
| 11400 | 1423532_at   | Region | Rnf44         | 105239 | 13 | 53289019  | 53303558  | - |
| 11401 | 1455298_at   | Region | Idb4          | 15904  | 13 | 47859485  | 47862094  | + |
| 11402 | 1433901_at   | Region | Gpiap1        | 53872  | 2  | 103469773 | 103502351 | - |
| 11403 | 1434586_a_at | Region | Ptdss2        | 27388  | 7  | 135533273 | 135558141 | + |
| 11404 | 1422537_a_at | Region | Id2           | 15902  | 12 | 21646605  | 21648874  | - |
| 11405 | 1439090_at   | Region | D030022P07Rik | 320607 | 16 | 56084412  | 56085344  | - |
| 11406 | 1452157_at   | Region | Eprs          | 107508 | 1  | 184861496 | 184926808 | + |
| 11407 | 1418391_at   | Region | Phf21a        | 192285 | 2  | 91918732  | 92065593  | + |
| 11408 | 1426963_at   | Region | Pacs1l        | 217893 | 12 | 108490808 | 108550569 | + |
| 11409 | 1438294_at   | Region | Sca1          | 20238  | 13 | 45130048  | 45540117  | - |
| 11410 | 1452902_at   | Region | 2610209N15Rik | 70451  | 11 | 77757998  | 77763521  | + |
| 11411 | 1438778_at   | Region | A930025H08Rik | 77807  | 13 | 27889889  | 27890934  | - |
| 11412 | 1451671_at   | Region | Gorasp1       | 74498  | 9  | 119935626 | 119947511 | - |
| 11413 | 1458555_at   | Region | AW121567      | 270028 | 8  | 8571891   | 9138527   | - |
| 11414 | 1417129_a_at | Region | Mrg1          | 17536  | 2  | 115376917 | 115578960 | - |
| 11415 | 1434744_at   | Region | BC023823      | 230734 | 4  | 123877893 | 123882353 | + |
| 11416 | 1428108_x_at | Region | Tmcc2         | 68875  | 1  | 132213622 | 132248587 | - |
| 11417 | 1438430_at   | Region | Hbp1          | 73389  | 12 | 28501152  | 28525243  | - |
| 11418 | 1439945_at   | Region | Zfp449        | 78619  | X  | 51117810  | 51120388  | + |
| 11419 | 1455397_at   | Region | Caskin1       | 268932 | 17 | 22292368  | 22312494  | + |
| 11420 | 1418502_a_at | Region | Oxr1          | 170719 | 15 | 41691294  | 41762827  | + |
| 11421 | 1457366_at   | Region | Cdc40         | 71713  | 10 | 40910293  | 40992658  | - |

|       |              |        |               |        |    |           |           |   |
|-------|--------------|--------|---------------|--------|----|-----------|-----------|---|
| 11422 | 1422678_at   | Region | Dgat2         | 67800  | 7  | 93245028  | 93274078  | - |
| 11423 | 1450170_x_at | Region | H2-D1         | 14964  | 17 | 186801    | 249200    | - |
| 11424 | 1440156_s_at | Region | Al851523      | 99101  | 2  | 162780917 | 162781136 | + |
| 11425 | 1444301_at   | Region | Pcdh10        | 18526  | 3  | 44837486  | 44841910  | + |
| 11426 | 1448589_at   | Region | Ndufb5        | 66046  | 3  | 32145242  | 32159738  | + |
| 11427 | 1450326_at   | Region | Shc3          | 20418  | 13 | 49996373  | 50120768  | - |
| 11428 | 1449338_at   | Region | D10Ertd641e   | 52717  | 10 | 59943553  | 59958756  | - |
| 11429 | 1429914_at   | Region | Epc1          | 13831  | 18 | 6478658   | 6558794   | - |
| 11430 | 1460552_at   | Region | Ascc3l1       | 320632 | 2  | 126722257 | 126754304 | + |
| 11431 | 1419714_at   | Region | Cd274         | 60533  | 19 | 28620054  | 28640694  | + |
| 11432 | 1458470_at   | Region | None          | None   | 13 | 74295654  | 74296396  | + |
| 11433 | 1433819_s_at | Region | Agpat3        | 28169  | 10 | 78381798  | 78461806  | - |
| 11434 | 1416350_at   | Region | Klf16         | 118445 | 10 | 80698354  | 80708753  | - |
| 11435 | 1450982_at   | Region | Slc9a3r1      | 26941  | 11 | 114984496 | 115002271 | + |
| 11436 | 1417091_at   | Region | Chuk          | 12675  | 19 | 43617742  | 43651851  | - |
| 11437 | 1421824_at   | Region | Bace1         | 23821  | 9  | 45851835  | 45875693  | + |
| 11438 | 1427689_a_at | Region | Tnip1         | 57783  | 11 | 54663628  | 54715753  | - |
| 11439 | 1425183_a_at | Region | Rpl4          | 67891  | 9  | 64294180  | 64299471  | + |
| 11440 | 1443856_at   | Region | Rabep1        | 54189  | 11 | 70570583  | 70666598  | + |
| 11441 | 1421569_at   | Region | Grid1         | 14803  | 14 | 32951534  | 33710256  | + |
| 11442 | 1422659_at   | Region | Camk2d        | 108058 | 3  | 125480582 | 125726370 | + |
| 11443 | 1425472_a_at | Region | Lmna          | 16905  | 3  | 88225013  | 88247171  | - |
| 11444 | 1442068_at   | Region | Pinx1         | 72400  | 14 | 58390951  | 58450455  | + |
| 11445 | 1436293_x_at | Region | D1Ertd471e    | 27877  | 1  | 166238203 | 166238610 | + |
| 11446 | 1454705_at   | Region | D15Ertd621e   | 210998 | 15 | 58436372  | 58467006  | + |
| 11447 | 1442810_x_at | Region | Scn9a         | 20274  | 2  | 66338406  | 66490352  | - |
| 11448 | 1428448_a_at | Region | Gtf3c2        | 71752  | 5  | 29615739  | 29638859  | - |
| 11449 | 1457690_at   | Region | Kalrn         | 224126 | 16 | 32782324  | 32783165  | - |
| 11450 | 1434078_at   | Region | D7Wsu128e     | 28018  | 7  | 115945280 | 115956990 | + |
| 11451 | 1418437_a_at | Region | Tcfl4         | 21428  | 11 | 100908397 | 100913294 | + |
| 11452 | 1436044_at   | Region | Scn7a         | 20272  | 2  | 66530712  | 66640318  | - |
| 11453 | 1420402_at   | Region | Atp2b2        | 11941  | 6  | 114316878 | 114489190 | - |
| 11454 | 1433493_at   | Region | 5730472N09Rik | 108958 | 2  | 30296497  | 30317681  | + |
| 11455 | 1450350_a_at | Region | MGI:1932093   | 81703  | 12 | 82468979  | 82509441  | + |
| 11456 | 1425092_at   | Region | Cdh10         | 320873 | 15 | 18747204  | 18942493  | + |
| 11457 | 1441904_x_at | Region | 9130005N14Rik | 68303  | 5  | 63771941  | 63843703  | + |
| 11458 | 1423725_at   | Region | Pls3          | 102866 | X  | 70446318  | 70535193  | - |
| 11459 | 1430634_a_at | Region | Pfkip         | 56421  | 13 | 6476970   | 6563786   | - |
| 11460 | 1419638_at   | Region | Efnb2         | 13642  | 8  | 7983291   | 8026630   | - |
| 11461 | 1460600_at   | Region | LOC245350     | 245350 | X  | 11175895  | 11177481  | + |
| 11462 | 1437183_at   | Region | Lrrc4b        | 272381 | 7  | 38517724  | 38540036  | + |
| 11463 | 1447277_s_at | Region | Pcyox1        | 66881  | 6  | 86820763  | 86870063  | - |
| 11464 | 1450756_s_at | Region | Cul3          | 26554  | 1  | 80599109  | 80655022  | - |
| 11465 | 1422414_a_at | Region | Calm2         | 12314  | 17 | 85290221  | 85303654  | - |
| 11466 | 1423165_a_at | Region | Mta2          | 23942  | 19 | 8138467   | 8148847   | + |
| 11467 | 1417845_at   | Region | Cldn6         | 54419  | 17 | 21481545  | 21484620  | + |
| 11468 | 1450454_at   | Region | Tor3a         | 30935  | 1  | 156560153 | 156579875 | - |
| 11469 | 1425859_a_at | Region | Psmd4         | 19185  | 3  | 94520536  | 94530376  | - |
| 11470 | 1431938_a_at | Region | Pmm2          | 54128  | 16 | 8311000   | 8330817   | + |
| 11471 | 1416187_s_at | Region | Pnrc2         | 52830  | 4  | 134752186 | 134755084 | - |
| 11472 | 1437196_x_at | Region | Rps16         | 20055  | 7  | 23752643  | 23754589  | + |
| 11473 | 1439283_at   | Region | Osbpl9        | 100273 | 4  | 108020555 | 108061497 | - |
| 11474 | 1452594_at   | Region | Dusp11        | 72102  | 6  | 86372013  | 86391226  | - |
| 11475 | 1440142_s_at | Region | Gfap          | 14580  | 11 | 102709766 | 102718169 | - |
| 11476 | 1435346_at   | Region | 2310043N13Rik | 66396  |    | 48970084  | 48970693  | + |
| 11477 | 1433702_at   | Region | D19Wsu12e     | 226090 | 19 | 28862793  | 28936642  | - |
| 11478 | 1429044_at   | Region | Camsap1l1     | 67886  | 1  | 136115147 | 136192998 | - |
| 11479 | 1419102_at   | Region | Sin3a         | 20466  | 9  | 57189858  | 57241642  | + |
| 11480 | 1443724_at   | Region | Jph3          | 57340  | 8  | 121112150 | 121172408 | + |
| 11481 | 1450194_a_at | Region | Myb           | 17863  | 10 | 21054488  | 21090667  | - |
| 11482 | 1440051_at   | Region | Ppp3ca        | 19055  | 3  | 135555655 | 135820664 | + |
| 11483 | 1451777_at   | Region | BC013672      | 234311 | 8  | 60993208  | 61102544  | + |
| 11484 | 1448448_a_at | Region | Chkb          | 12651  | 15 | 89479240  | 89482772  | - |
| 11485 | 1427939_s_at | Region | Mycbp         | 56309  | 4  | 122932163 | 122939256 | + |
| 11486 | 1435370_a_at | Region | Ces3          | 104158 | 8  | 92449775  | 92481484  | - |

|       |              |        |               |        |    |           |           |   |
|-------|--------------|--------|---------------|--------|----|-----------|-----------|---|
| 11487 | 1445377_at   | Region | Als2cr19      | 72823  | 1  | 61929985  | 62930941  | + |
| 11488 | 1427844_a_at | Region | Cebpb         | 12608  | 2  | 167197648 | 167199151 | + |
| 11489 | 1423211_at   | Region | Nola3         | 66181  | 2  | 111885207 | 111886138 | + |
| 11490 | 1448060_at   | Region | Sema6d        | 214968 | 2  | 124124149 | 124181623 | + |
| 11491 | 1448691_at   | Region | Ubqln4        | 94232  | 3  | 88297580  | 88313589  | + |
| 11492 | 1435000_at   | Region | Gspt1         | 14852  | 16 | 10388595  | 10422192  | + |
| 11493 | 1456226_x_at | Region | Ddr1          | 12305  | 17 | 33397888  | 33421229  | - |
| 11494 | 1455476_a_at | Region | Gse1          | 382034 | 8  | 119846048 | 119938723 | + |
| 11495 | 1436485_s_at | Region | Whrn          | 73750  | 4  | 62506101  | 62587142  | - |
| 11496 | 1426340_at   | Region | Slc1a3        | 20512  | 15 | 8424368   | 8500974   | - |
| 11497 | 1450972_at   | Region | 3110040N11Rik | 67290  | 7  | 75590133  | 75597570  | - |
| 11498 | 1417242_at   | Region | Ddx48         | 192170 | 11 | 119109456 | 119121136 | - |
| 11499 | 1417153_at   | Region | Btbd14a       | 67991  | 2  | 25991155  | 26054942  | - |
| 11500 | 1433925_at   | Region | Dncllc2       | 234663 | 8  | 103710711 | 103736151 | - |
| 11501 | 1430538_at   | Region | 2210013O21Rik | 70123  | X  | 147242260 | 147275811 | + |
|       |              |        | Nono ///      |        |    |           |           |   |
| 11502 | 1415820_x_at | Region | LOC434808     | 434808 | X  | 75193538  | 75198479  | - |
|       |              |        | Rpl35a ///    |        |    |           |           |   |
| 11503 | 1417317_s_at | Region | 4632409L19Rik | 57808  | 16 | 31865188  | 31868217  | + |
| 11504 | 1450389_s_at | Region | Pip5k1a       | 18719  | 19 | 23533932  | 23683715  | - |
| 11505 | 1444422_at   | Region | Pcdh19        | 279653 | X  | 127132549 | 127233781 | - |
| 11506 | 1451297_at   | Region | Gulo          | 268756 | 14 | 60514207  | 60536630  | - |
| 11507 | 1455889_at   | Region | Mlst1         | 330450 | 6  | 149072613 | 149116582 | + |
| 11508 | 1449897_a_at | Region | Mtcp1         | 17763  | X  | 70065501  | 70077198  | - |
| 11509 | 1450399_at   | Region | Psen1         | 19164  | 12 | 80552589  | 80599225  | + |
| 11510 | 1434395_at   | Region | Man1a2        | 17156  | 3  | 99992328  | 100111138 | - |
| 11511 | 1452973_at   | Region | Ppm1k         | 243382 | 6  | 57667241  | 57693162  | - |
| 11512 | 1446147_at   | Region | C79248        | 96982  | 2  | 155626395 | 155627019 | - |
| 11513 | 1460657_at   | Region | Wnt10a        | 22409  | 1  | 75095603  | 75108385  | + |
| 11514 | 1422798_at   | Region | Cntnap2       | 66797  | 6  | 45854973  | 47502306  | + |
| 11515 | 1434629_at   | Region | None          | None   | 2  | 37364330  | 37366015  | - |
| 11516 | 1450922_a_at | Region | Tgfb2         | 21808  | 1  | 186121756 | 186210661 | - |
| 11517 | 1456883_at   | Region | Stox1         | 216021 | 10 | 62625575  | 62692453  | - |
| 11518 | 1426710_at   | Region | Calm3         | 12315  | 7  | 13866351  | 13874927  | - |
| 11519 | 1417094_at   | Region | MGI:1917275   | 70025  | 4  | 150670496 | 150764209 | + |
| 11520 | 1456334_s_at | Region | A230106D06Rik | 232785 | 6  | 48067302  | 48076242  | + |
| 11521 | 1448424_at   | Region | Frzb          | 20378  | 2  | 80109719  | 80145145  | - |
| 11522 | 1457183_at   | Region | Slc6a1        | 232333 | 6  | 114853331 | 114888000 | + |
| 11523 | 1455069_x_at | Region | Slc25a4       | 11739  | 8  | 45151043  | 45155041  | - |
| 11524 | 1434404_at   | Region | C030011O14Rik | 215708 | 3  | 151257333 | 151321808 | - |
| 11525 | 1427899_at   | Region | Rnf6          | 74132  | 5  | 145096046 | 145108279 | - |
| 11526 | 1451171_at   | Region | 2310008H04Rik | 224008 | 16 | 14656989  | 14914568  | - |
| 11527 | 1421851_at   | Region | Ddx26         | 18130  | 14 | 57209161  | 57294009  | - |
| 11528 | 1420734_at   | Region | Ppp1r3f       | 54646  | X  | 5797892   | 5813060   | - |
| 11529 | 1417165_at   | Region | Mbd2          | 17191  | 18 | 70800857  | 70858783  | + |
| 11530 | 1417168_a_at | Region | Usp2          | 53376  | 9  | 44056022  | 44083332  | + |
| 11531 | 1460601_at   | Region | Myrip         | 245049 | 9  | 120316489 | 120487292 | + |
| 11532 | 1416502_a_at | Region | Preb          | 50907  | 5  | 29413992  | 29419173  | - |
| 11533 | 1424495_a_at | Region | Cklf          | 75458  | 8  | 103545239 | 103557779 | + |
| 11534 | 1418822_a_at | Region | Arf6          | 11845  | 12 | 66203985  | 66205580  | + |
| 11535 | 1424824_at   | Region | 9630044O09Rik | 105439 | 14 | 98195231  | 98249790  | + |
| 11536 | 1433614_at   | Region | Snx27         | 76742  | 3  | 93985373  | 94070606  | - |
| 11537 | 1434660_at   | Region | Alkbh         | 211064 | 12 | 84553626  | 84569673  | + |
| 11538 | 1438650_x_at | Region | Gja1          | 14609  | 10 | 56627159  | 56640230  | + |
| 11539 | 1460403_at   | Region | Psip1         | 101739 | 4  | 82441872  | 82472582  | - |
| 11540 | 1439557_s_at | Region | Ldb2          | 16826  | 5  | 43229785  | 43558377  | - |
| 11541 | 1458163_at   | Region | BC066028      | 407812 | 7  | 135211557 | 135223941 | - |
| 11542 | 1428398_at   | Region | B3galt5       | 93961  | 16 | 95762296  | 95799852  | + |
| 11543 | 1457213_a_at | Region | Dgkh          | 380921 | 14 | 72922487  | 72981706  | - |
| 11544 | 1441277_s_at | Region | Ptprk         | 19272  | 10 | 28105024  | 28627423  | + |
| 11545 | 1432916_at   | Region | 5730407I07Rik | 70515  | 15 | 33597307  | 33598609  | + |
| 11546 | 1443982_at   | Region | Rgnf          | 110596 | 13 | 94087960  | 94394666  | - |
| 11547 | 1427371_at   | Region | Abca8a        | 217258 | 11 | 109846725 | 109912709 | - |
| 11548 | 1418085_at   | Region | Prkcz         | 18762  | 4  | 153754439 | 153853605 | - |
| 11549 | 1417777_at   | Region | Ltb4dh        | 67103  | 4  | 58909039  | 58930527  | - |

|       |              |        |                    |        |    |           |           |   |
|-------|--------------|--------|--------------------|--------|----|-----------|-----------|---|
| 11550 | 1448026_at   | Region | Chd7               | 320790 | 4  | 8617703   | 8793952   | + |
| 11551 | 1426069_s_at | Region | Slc7a4             | 224022 | 16 | 16343928  | 16347174  | - |
| 11552 | 1418121_at   | Region | Vrk3               | 101568 | 7  | 38823439  | 38852449  | + |
| 11553 | 1438116_x_at | Region | Slc9a3r1           | 26941  | 11 | 114984496 | 115002271 | + |
| 11554 | 1428500_at   | Region | 2210419D22Rik      | 73661  | 6  | 135203243 | 135206518 | - |
| 11555 | 1426323_x_at | Region | MGI:1353606        | 30954  | 12 | 108124289 | 108128532 | + |
| 11556 | 1446260_at   | Region | 4930447C04Rik      | 75801  | 12 | 69728240  | 69764946  | - |
| 11557 | 1435791_x_at | Region | Rpl17              | 319195 | 18 | 75235707  | 75238565  | + |
| 11558 | 1456888_at   | Region | C230090D14         | 270198 | 9  | 109038494 | 109078817 | + |
| 11559 | 1426535_at   | Region | 9630046K23Rik      | 224143 | 16 | 37343910  | 37372402  | - |
| 11560 | 1438213_at   | Region | A830018L16Rik      | 320492 | 1  | 11519751  | 12100440  | + |
| 11561 | 1428239_at   | Region | Ankrd16            | 320816 | 2  | 11694586  | 11697273  | + |
| 11562 | 1433656_a_at | Region | Gnl3               | 30877  | 14 | 29144393  | 29151021  | - |
| 11563 | 1418947_at   | Region | Nek3               | 23954  | 8  | 20880454  | 20918573  | - |
| 11564 | 1422147_a_at | Region | Pla2g6             | 53357  | 15 | 79337514  | 79379454  | - |
| 11565 | 1449972_s_at | Region | Zfp97 /// BC018101 | 22759  | 17 | 0         | 593       | + |
| 11566 | 1422467_at   | Region | None               | None   | 4  | 121863359 | 121886854 | + |
| 11567 | 1450016_at   | Region | Ccng1              | 12450  | 11 | 40489722  | 40494170  | - |
| 11568 | 1436068_at   | Region | Zbtb10             | 229055 | 3  | 9111529   | 9270577   | + |
| 11569 | 1450129_a_at | Region | Socs6              | 54607  | 18 | 89012087  | 89038416  | - |
| 11570 | 1443247_at   | Region | None               | None   | 13 | 42851494  | 42852002  | - |
| 11571 | 1435421_at   | Region | Fsd1               | 240121 | 17 | 53625987  | 53635126  | + |
| 11572 | 1442111_at   | Region | D430033H22Rik      | 320461 | 19 | 45731358  | 45732042  | + |
| 11573 | 1436724_a_at | Region | Lgtn               | 16865  | 1  | 131002708 | 131021706 | + |
| 11574 | 1448934_at   | Region | Ndufa10            | 67273  | 1  | 92267199  | 92301249  | - |
| 11575 | 1437799_at   | Region | 4933407H18Rik      | 71101  | 5  | 31867548  | 31908144  | + |
| 11576 | 1433767_at   | Region | 1110018G07Rik      | 68497  | 12 | 81786755  | 81819896  | - |
| 11577 | 1459293_at   | Region | C030038J10Rik      | 243385 | 6  | 59598164  | 59670385  | - |
| 11578 | 1441055_at   | Region | R75368             | 97198  | 4  | 57659946  | 57660576  | + |
| 11579 | 1421958_at   | Region | L1cam              | 16728  | X  | 68515690  | 68530459  | - |
| 11580 | 1416418_at   | Region | Gabarap1           | 57436  | 6  | 130220677 | 130229816 | + |
| 11581 | 1434150_a_at | Region | 3300001H21Rik ///  |        |    |           |           |   |
| 11582 | 1422733_at   | Region | MGI:3026615        | 393082 | 15 | 100410740 | 100418501 | + |
| 11583 | 1416625_at   | Region | Fjx1               | 14221  | 2  | 102154049 | 102156475 | - |
| 11584 | 1424566_s_at | Region | Serping1           | 12258  | 2  | 84463134  | 84473153  | - |
| 11585 | 1424566_s_at | Region | Polr3d             | 67065  | 14 | 64754785  | 64759436  | - |
| 11585 | 1456204_at   | Region | 2010107H07Rik      | 66487  | 14 | 29256469  | 29262975  | - |
| 11586 | 1436589_x_at | Region | Prkd2              | 101540 | 7  | 13794089  | 13821505  | + |
| 11587 | 1426094_at   | Region | Rhbd11             | 214951 | 17 | 23640626  | 23643288  | - |
| 11588 | 1424557_at   | Region | Zcchc9             | 69085  | 13 | 87933565  | 87943200  | - |
| 11589 | 1449050_at   | Region | Recc1              | 19687  | 5  | 64063687  | 64137434  | - |
| 11590 | 1416432_at   | Region | Pfkfb3             | 170768 | 2  | 11387835  | 11418034  | - |
| 11591 | 1425665_a_at | Region | Srp54              | 24067  | 12 | 51906616  | 51907500  | + |
| 11592 | 1426300_at   | Region | Alcam              | 11658  | 16 | 51168811  | 51372049  | - |
| 11593 | 1430560_at   | Region | Ppp1r10            | 52040  | 17 | 33636151  | 33651436  | + |
| 11594 | 1417029_a_at | Region | Trim2              | 80890  | 3  | 83898180  | 83960638  | - |
| 11595 | 1425408_a_at | Region | 2610034M16Rik      | 69239  | 17 | 56562860  | 56568186  | - |
| 11596 | 1421369_a_at | Region | Mab211i            | 17116  | 3  | 55415255  | 55417607  | + |
| 11597 | 1421982_a_at | Region | Unc50              | 67387  | 1  | 37724660  | 37733461  | + |
| 11598 | 1443390_at   | Region | Dock1              | 330662 | 7  | 129038306 | 129541299 | + |
| 11599 | 1417411_at   | Region | Nap115             | 58243  | 6  | 59067708  | 59069539  | - |
| 11600 | 1424468_s_at | Region | Phldb1             | 102693 | 9  | 44675163  | 44724049  | - |
| 11601 | 1438241_at   | Region | Rgma               | 244058 | 7  | 67267239  | 67313292  | + |
| 11602 | 1434105_at   | Region | Epm2aip1           | 77781  | 9  | 111313226 | 111320386 | + |
| 11603 | 1438483_at   | Region | None               | None   | 5  | 117083657 | 117084800 | + |
| 11604 | 1424604_s_at | Region | Sumf1              | 58911  | 6  | 108608573 | 108687101 | - |
| 11605 | 1441926_x_at | Region | Tmie               | 20776  | 9  | 110907343 | 110921380 | - |
| 11606 | 1444395_at   | Region | Dixdc1             | 330938 | 9  | 50735078  | 50800301  | - |
| 11607 | 1453060_at   | Region | Rgs8               | 67792  | 1  | 153537740 | 153582301 | + |
| 11608 | 1437774_at   | Region | 1700020I14Rik      | 66602  | 2  | 119108145 | 119117748 | + |
| 11609 | 1428300_at   | Region | 4932439K10Rik      | 74392  | 10 | 75332436  | 75414133  | + |
| 11610 | 1424847_at   | Region | Nefh               | 380684 | 11 | 4833545   | 4842900   | - |
| 11611 | 1457490_at   | Region | B230218L05Rik      | 330998 | 9  | 89615314  | 89625540  | - |
| 11612 | 1439234_a_at | Region | Tm2d2              | 69742  | 8  | 23740385  | 23746364  | + |



|       |              |        |                   |        |      |           |           |      |
|-------|--------------|--------|-------------------|--------|------|-----------|-----------|------|
| 11613 | 1427120_at   | Region | Zfp26             | 22688  | 9    | 20309411  | 20333047  | -    |
| 11614 | 1450247_a_at | Region | Scamp5            | 56807  | 9    | 57554973  | 57581670  | -    |
| 11615 | 1460565_at   | Region | Slc41a1           | 98396  | 1    | 131678316 | 131697273 | +    |
| 11616 | 1431619_a_at | Region | Dtnbp1            | 94245  | 13   | 44496235  | 44576050  | -    |
| 11617 | 1424613_at   | Region | Gprc5b            | 64297  | 7    | 112847904 | 112871012 | -    |
| 11618 | 1423563_at   | Region | ORF31             | 260297 | 17   | 32332934  | 32335508  | +    |
| 11619 | 1435790_at   | Region | Olfm2             | 244723 | 9    | 20538487  | 20598918  | -    |
| 11620 | 1446258_at   | Region | None              | None   | 15   | 55843404  | 55844180  | -    |
| 11621 | 1420892_at   | Region | Wnt7b             | 22422  | 15   | 85584040  | 85630181  | -    |
| 11622 | 1454792_s_at | Region | Sephs1            | 109079 | 2    | 4798835   | 4827828   | +    |
| 11623 | 1448139_at   | Region | Mlc1              | 170790 | 15   | 89007469  | 89030936  | -    |
| 11624 | 1459483_at   | Region | AW121567          | 270028 | 8    | 8571891   | 9138527   | -    |
| 11625 | 1428644_at   | Region | Mgat5             | 107895 | 1    | 127142098 | 127323193 | +    |
| 11626 | 1426866_at   | Region | D4st1             | 72136  | 2    | 118440373 | 118442434 | +    |
| 11627 | 1433894_at   | Region | AI591476          | 231986 | 6    | 52913122  | 52956624  | -    |
| 11628 | 1417235_at   | Region | Ehd3              | 57440  | 17   | 71586595  | 71613824  | +    |
| 11629 | 1421433_at   | Region | Zfhx4             | 80892  | 3    | 5216397   | 5389236   | +    |
| 11630 | 1424390_at   | Region | Nupl1             | 71844  | 14   | 54755759  | 54787669  | -    |
| 11631 | 1416609_at   | Region | BC004004          | 80748  | 17   | 27090378  | 27115403  | +    |
| 11632 | 1452234_s_at | Region | D16Bwg1494e       | 224019 | 16   | 16047277  | 16049629  | +    |
| 11633 | 1456390_at   | Region | Ppp2ca            | 19052  | 11   | 51851665  | 51875590  | +    |
| 11634 | 1422247_a_at | Region | Uty /// LOC546404 | 22290  | Y    | 41346     | 184254    | +    |
| 11635 | 1433156_at   | Region | Kcnp1             | 70357  | 11   | 33524574  | 33738321  | -    |
| 11636 | 1438673_at   | Region | Slc4a7            | 218756 | 14   | 13169299  | 13264198  | +    |
|       |              |        | Rps6 ///          |        |      |           |           |      |
|       |              |        | LOC434404 ///     |        |      |           |           |      |
| 11637 | 1455693_x_at | Region | LOC545640         | 20104  | 4    | 85840854  | 85843549  | -    |
| 11638 | 1423474_at   | Region | Top1              | 21969  | 2    | 160127068 | 160179680 | +    |
| 11639 | 1437417_s_at | Region | Gpc6              | 23888  | 14   | 111487529 | 112531234 | +    |
| 11640 | 1425131_at   | Region | Ptpn5             | 19259  | 7    | 41163785  | 41219667  | -    |
| 11641 | 1424030_at   | Region | Tcfcp2l2          | 195733 | 12   | 21130474  | 21167143  | +    |
| 11642 | 1439454_x_at | Region | Tm2d2             | 69742  | 8    | 23740385  | 23746364  | +    |
| 11643 | 1443287_at   | Region | ---               | 383787 | 2    | 118216115 | 118217287 | -    |
| 11644 | 1458307_at   | Region | B230334C09Rik     | 319537 | 3    | 157082841 | 157083211 | -    |
| 11645 | 1448364_at   | Region | Ccng2             | 12452  | 5    | 92603007  | 92611974  | +    |
| 11646 | 1427042_at   | Region | Mal2              | 105853 | 15   | 54573445  | 54604798  | +    |
| 11647 | 1436372_a_at | Region | AA415817          | 94184  | 16   | 12571455  | 12638826  | -    |
| 11648 | 1438557_x_at | Region | Dnpep             | 13437  | 1    | 75598827  | 75608568  | -    |
|       |              |        | Uty /// LOC546404 |        |      |           |           |      |
| 11649 | 1426598_at   | Region | /// LOC546411     | 22290  | Y    | 41346     | 184254    | +    |
|       |              |        | Ftl1 /// Ftl2 /// |        |      |           |           |      |
|       |              |        | LOC544951 ///     |        |      |           |           |      |
| 11650 | 1422302_s_at | Region | LOC545679         | 14325  | 7    | 6038071   | 6038985   | -    |
| 11651 | 1460070_at   | Region | Chst2             | 54371  | 9    | 95313309  | 95315530  | -    |
| 11652 | 1437312_at   | Region | Bmpr1b            | 12167  | 3    | 140807013 | 140952143 | -    |
| 11653 | 1457495_at   | Region | 2900052N01Rik     | 73040  | NONE | NONE      | NONE      | NONE |
| 11654 | 1454901_at   | Region | 6430570G24        | 327989 | 11   | 86664419  | 86665560  | -    |
| 11655 | 1426824_at   | Region | Psme4             | 103554 | 11   | 30666852  | 30774524  | +    |
| 11656 | 1456433_at   | Region | Rcctb1            | 71330  | 14   | 53736681  | 53772708  | +    |
| 11657 | 1460315_s_at | Region | Tbk1              | 56480  | 10   | 121202714 | 121243001 | -    |
| 11658 | 1451741_a_at | Region | Cdk7              | 12572  | 13   | 96873946  | 96901672  | -    |
| 11659 | 1456628_x_at | Region | Rps24             | 20088  | 14   | 22859652  | 22865117  | +    |
| 11660 | 1438093_x_at | Region | Dbi               | 13167  | 1    | 119870842 | 119878615 | -    |
| 11661 | 1418123_at   | Region | Unc119            | 22248  | 11   | 78069181  | 78074815  | +    |
| 11662 | 1423998_at   | Region | Gtf3c5            | 70239  | 2    | 28498477  | 28515408  | -    |
| 11663 | 1449043_at   | Region | Naga              | 17939  | 15   | 82380266  | 82389523  | -    |
| 11664 | 1451210_at   | Region | Ppap2c            | 50784  | 10   | 79648047  | 79654486  | -    |
| 11665 | 1424444_a_at | Region | 1600014C10Rik     | 72244  | 7    | 33351336  | 33365081  | +    |
| 11666 | 1433718_a_at | Region | Cbx1              | 12412  | 11   | 96610246  | 96629727  | +    |
| 11667 | 1417960_at   | Region | Cpeb1             | 12877  | 7    | 75155001  | 75262817  | -    |
| 11668 | 1436918_at   | Region | 1810038L18Rik     | 69181  | 10   | 118438264 | 118440169 | -    |
| 11669 | 1431530_a_at | Region | Tspan5            | 56224  | 3    | 137631430 | 137793659 | +    |
| 11670 | 1418529_at   | Region | Osgep             | 66246  | 14   | 46010322  | 46019468  | -    |
| 11671 | 1439839_at   | Region | D130051D11Rik     | 319737 | 15   | 85673593  | 85716318  | +    |
| 11672 | 1416823_a_at | Region | Ospl1a            | 64291  | 18   | 12943381  | 13129769  | -    |

|       |              |        |               |        |    |           |           |   |
|-------|--------------|--------|---------------|--------|----|-----------|-----------|---|
| 11673 | 1417683_at   | Region | Diablo        | 66593  | 5  | 122682693 | 122695654 | - |
| 11674 | 1417213_a_at | Region | Rbm6          | 19654  | 9  | 107841550 | 107940685 | - |
| 11675 | 1424988_at   | Region | Myliip        | 218203 | 13 | 44964531  | 44986418  | + |
| 11676 | 1437969_s_at | Region | 0610007P22Rik | 68327  | 17 | 23046050  | 23048646  | + |
| 11677 | 1417575_at   | Region | Otub2         | 68149  | 12 | 98834218  | 98851823  | + |
| 11678 | 1421952_at   | Region | Capn6         | 12338  | X  | 137242282 | 137286776 | - |
| 11679 | 1416074_a_at | Region | Rpl28         | 19943  | 7  | 4039146   | 4044498   | + |
| 11680 | 1437746_at   | Region | Lrrtm1        | 74342  | 6  | 77592843  | 77607877  | + |
| 11681 | 1421768_a_at | Region | Homer1        | 26556  | 13 | 89489518  | 89588558  | + |
| 11682 | 1449070_x_at | Region | Apcdd1        | 494504 | 18 | 63040206  | 63182348  | + |
| 11683 | 1428688_at   | Region | Pdcd11        | 18572  | 19 | 46642066  | 46682446  | + |
| 11684 | 1448630_a_at | Region | Sdhc          | 66052  | 1  | 171058005 | 171079442 | - |
| 11685 | 1460189_at   | Region | Wdr23         | 28199  | 14 | 50079168  | 50088008  | + |
| 11686 | 1436805_at   | Region | 2810457I06Rik | 72828  | 9  | 40966047  | 41111032  | - |
| 11687 | 1455230_at   | Region | Cacng4        | 54377  | 11 | 107555869 | 107615553 | - |
| 11688 | 1456326_at   | Region | Gm784         | 333564 | X  | 101021406 | 101086594 | - |
| 11689 | 1449422_at   | Region | Cdh4          | 12561  | 2  | 179497210 | 179613363 | + |
| 11690 | 1450449_a_at | Region | 2900002H16Rik | 75695  | 5  | 123664423 | 123702734 | - |
| 11691 | 1435845_at   | Region | 2900006N09Rik | 72898  | 5  | 111455434 | 111462202 | - |
| 11692 | 1424568_at   | Region | Tspan2        | 70747  | 3  | 102162658 | 102198922 | + |
| 11693 | 1430037_at   | Region | Snx27         | 76742  | 3  | 93985373  | 94070606  | - |
| 11694 | 1458802_at   | Region | Hivep3        | 16656  | 4  | 119003584 | 119157855 | + |
| 11695 | 1456036_x_at | Region | Gsto1         | 14873  | 19 | 47406289  | 47416090  | + |
| 11696 | 1423220_at   | Region | Eif4e         | 13684  | 3  | 137416519 | 137446834 | + |
| 11697 | 1426733_at   | Region | Itpk1         | 217837 | 12 | 98013454  | 98150125  | - |
| 11698 | 1456393_at   | Region | 2310002J21Rik | 66360  | 19 | 53175077  | 53508819  | - |
| 11699 | 1456739_x_at | Region | Armxcx2       | 67416  | X  | 128349086 | 128353933 | - |
| 11700 | 1457146_at   | Region | Dock4         | 238130 | 12 | 37324777  | 37326167  | + |
| 11701 | 1428914_at   | Region | 2310014D11Rik | 69633  | 19 | 46811476  | 46812774  | - |
| 11702 | 1460424_at   | Region | 1810008O21Rik | 69094  | 7  | 13402158  | 13404869  | + |
| 11703 | 1455667_at   | Region | None          | None   | 5  | 29410615  | 29412616  | - |
| 11704 | 1440388_at   | Region | None          | None   | 6  | 28310038  | 28310758  | + |
| 11705 | 1424206_at   | Region | Smarca5       | 93762  | 8  | 79911951  | 79951467  | - |
| 11706 | 1427604_a_at | Region | Atp9a         | 11981  | 2  | 168143171 | 168250533 | - |
| 11707 | 1435705_at   | Region | LOC232875     | 232875 | 7  | 10761773  | 10775035  | - |
| 11708 | 1458409_at   | Region | C86595        | 97935  | 14 | 49268738  | 49269867  | - |
| 11709 | 1435238_x_at | Region | 2310009A05Rik | 66364  | 9  | 73172461  | 73175337  | + |
| 11710 | 1434200_at   | Region | BC010981      | 407830 | 14 | 54760287  | 54760969  | - |
| 11711 | 1455010_at   | Region | 1500012F01Rik | 68949  | 2  | 166519800 | 166522596 | + |
| 11712 | 1430543_at   | Region | 1500005P14Rik | 76686  | 7  | 25693378  | 25719722  | + |
| 11713 | 1438232_at   | Region | Foxp2         | 114142 | 6  | 14888986  | 15429612  | + |
| 11714 | 1426084_a_at | Region | Tor1a1p1      | 208263 | 1  | 155902618 | 155932908 | - |
| 11715 | 1430154_at   | Region | 4930543C13Rik | 78932  | 19 | 15856656  | 15858955  | - |
| 11716 | 1419457_at   | Region | Rgndf         | 110596 | 13 | 94087960  | 94394666  | - |
| 11717 | 1441780_at   | Region | None          | None   | 3  | 24837915  | 24838360  | - |
| 11718 | 1419462_s_at | Region | Gtl3          | 14894  | 8  | 94698722  | 94713270  | - |
| 11719 | 1431592_a_at | Region | Sh3kbp1       | 58194  | X  | 153308006 | 153573572 | + |
| 11720 | 1455924_at   | Region | Rab6b         | 270192 | 9  | 103083792 | 103160522 | + |
| 11721 | 1460739_at   | Region | D11Bwg0280e   | 52915  | 11 | 6284151   | 6300949   | + |
| 11722 | 1440764_at   | Region | Araf          | 11836  | X  | 19087538  | 19099458  | + |
| 11723 | 1431597_a_at | Region | Nrip3         | 78593  | 7  | 103610927 | 103634416 | - |
| 11724 | 1435741_at   | Region | Pde8b         | 218461 | 13 | 91208631  | 91434426  | - |
| 11725 | 1446610_at   | Region | Elmo1         | 140580 | 13 | 19666927  | 20088452  | + |
| 11726 | 1418785_at   | Region | Mapk8ip2      | 60597  | 15 | 89507005  | 89515320  | + |
| 11727 | 1420843_at   | Region | Ptpfr         | 19268  | 4  | 117168706 | 117236351 | - |
| 11728 | 1415986_at   | Region | Cln4-2        | 12727  | 7  | 241       | 13444     | + |
| 11729 | 1429564_at   | Region | Pcgf5         | 76073  | 19 | 35721737  | 35798874  | + |
| 11730 | 1433973_at   | Region | Seps1         | 109079 | 2  | 4798835   | 4827828   | + |
| 11731 | 1443175_at   | Region | A830010M09Rik | 320317 | 3  | 25281887  | 25282477  | - |
| 11732 | 1424346_at   | Region | Ppp6c         | 67857  | 2  | 39128960  | 39158501  | - |
| 11733 | 1443849_x_at | Region | Urod          | 22275  | 4  | 115949123 | 115953269 | - |
| 11734 | 1429696_at   | Region | Gpr123        | 52389  | 7  | 134230082 | 134274053 | + |
| 11735 | 1428602_at   | Region | Kcnj9         | 16524  | 1  | 172251006 | 172258201 | - |
| 11736 | 1428768_at   | Region | 2700050F09Rik | 72587  | 5  | 146420994 | 146439998 | + |
| 11737 | 1440108_at   | Region | Foxp2         | 114142 | 6  | 14888986  | 15429612  | + |

|       |              |        |                 |        |    |           |           |   |
|-------|--------------|--------|-----------------|--------|----|-----------|-----------|---|
| 11738 | 1418560_at   | Region | Pdha1           | 18597  | X  | 153721624 | 153737741 | - |
| 11739 | 1431711_a_at | Region | 9030409G11Rik   | 71529  | 4  | 140983652 | 141035828 | - |
| 11740 | 1455732_at   | Region | 1700025G04Rik   | 69399  | 1  | 151777069 | 151974583 | - |
| 11741 | 1419089_at   | Region | Timp3           | 21859  | 10 | 86261055  | 86310024  | + |
| 11742 | 1449503_at   | Region | Kpna1           | 16646  | 16 | 34764772  | 34817569  | + |
| 11743 | 1444679_at   | Region | Bhc80           | 192285 | 2  | 91918732  | 92065593  | + |
| 11744 | 1425792_a_at | Region | Rorc            | 19885  | 3  | 93860609  | 93886411  | + |
| 11745 | 1420375_at   | Region | Kif3a           | 16568  | 11 | 53320244  | 53354795  | + |
| 11746 | 1424024_at   | Region | Mcfd2           | 193813 | 17 | 85111247  | 85122719  | - |
| 11747 | 1425338_at   | Region | Plcb4           | 18798  | 2  | 135319401 | 135526921 | + |
| 11748 | 1428877_at   | Region | Srp72           | 66661  | 5  | 76219172  | 76244365  | + |
| 11749 | 1422005_at   | Region | Prkr            | 19106  | 17 | 76674799  | 76704807  | - |
| 11750 | 1426081_a_at | Region | Dio2            | 13371  | 12 | 86128063  | 86141948  | - |
| 11751 | 1422552_at   | Region | Rprm            | 67874  | 2  | 54009632  | 54011091  | - |
| 11752 | 1442347_at   | Region | Lrp8            | 16975  | 4  | 106761166 | 106833072 | + |
| 11753 | 1427384_at   | Region | 5430439G14Rik   | 71389  | 2  | 160403955 | 160419235 | - |
| 11754 | 1424529_s_at | Region | Cgref1          | 68567  | 5  | 29392087  | 29404535  | - |
| 11755 | 1439410_x_at | Region | D11Ert333e      | 68066  | 11 | 102224234 | 102228559 | - |
| 11756 | 1456108_x_at | Region | Zfp179          | 22671  | 11 | 61174084  | 61179528  | - |
| 11757 | 1450249_s_at | Region | Kif5a /// Kif5c | 16572  | 10 | 126965001 | 126999707 | - |
| 11758 | 1429348_at   | Region | Sema3c          | 20348  | 5  | 15994279  | 16149731  | + |
| 11759 | 1420834_at   | Region | Vamp2           | 22318  | 11 | 68814186  | 68818039  | + |
| 11760 | 1460440_at   | Region | Lphn3           | 319387 | 5  | 80275281  | 81049432  | + |
| 11761 | 1435568_at   | Region | AK129128        | 218343 | 13 | 72188389  | 72247425  | + |
| 11762 | 1451049_at   | Region | Bcap31          | 27061  | X  | 68346838  | 68376830  | - |
| 11763 | 1428662_a_at | Region | MGI:1916782     | 74318  | 5  | 76331480  | 76359676  | - |
| 11764 | 1428179_at   | Region | Ndufv2          | 72900  | 17 | 63788360  | 63810997  | - |
| 11765 | 1420927_at   | Region | St6gal1         | 20440  | 16 | 22008076  | 22143979  | + |
| 11766 | 1448295_at   | Region | D13Wsu50e       | 28077  | 13 | 65842571  | 65848783  | + |
| 11767 | 1451280_at   | Region | MGI:107562      | 74100  | 9  | 112222231 | 112229149 | - |
| 11768 | 1423972_at   | Region | Etfp            | 110842 | 9  | 55567483  | 55625204  | - |
| 11769 | 1448905_at   | Region | Nme3            | 79059  | 17 | 22702408  | 22703419  | + |
| 11770 | 1460680_a_at | Region | Rpl23           | 65019  | 11 | 97598630  | 97603460  | - |
| 11771 | 1418255_s_at | Region | Srf             | 20807  | 17 | 44056896  | 44066219  | - |
| 11772 | 1425326_at   | Region | Acly            | 104112 | 11 | 100297443 | 100348988 | - |
| 11773 | 1455481_at   | Region | Ids             | 15931  | X  | 65014764  | 65033475  | - |
| 11774 | 1416484_at   | Region | Ttc3            | 22129  | 16 | 93778128  | 93866771  | + |
| 11775 | 1423748_at   | Region | Pdk1            | 228026 | 2  | 71570967  | 71599744  | + |
| 11776 | 1426256_at   | Region | Timm17a         | 21854  | 1  | 135152008 | 135164210 | - |
| 11777 | 1442883_s_at | Region | D10Bwg1364e     | 216169 | 10 | 80715282  | 80721253  | - |
| 11778 | 1426775_s_at | Region | Scamp1          | 107767 | 13 | 90385498  | 90469347  | - |
| 11779 | 1423200_at   | Region | Ncor1           | 20185  | 11 | 62043183  | 62164152  | - |
| 11780 | 1453369_a_at | Region | Fundc1          | 72018  | X  | 15795509  | 15811237  | - |
| 11781 | 1436854_at   | Region | Trpc2           | 22064  | 7  | 96181838  | 96202292  | + |
| 11782 | 1424240_at   | Region | Arfp2           | 76932  | 7  | 99750533  | 99755261  | - |
| 11783 | 1430579_at   | Region | Tnik            | 69014  | 3  | 27680596  | 28087969  | + |
| 11784 | 1444268_at   | Region | BC004004        | 80748  | 17 | 27090378  | 27115403  | + |
| 11785 | 1431403_a_at | Region | 2900002G04Rik   | 78283  | X  | 153013977 | 153098157 | + |
| 11786 | 1416001_a_at | Region | Cotl1           | 72042  | 8  | 119165392 | 119197206 | - |
| 11787 | 1454721_at   | Region | 1110018G07Rik   | 68497  | 12 | 81786755  | 81819896  | - |
| 11788 | 1429360_at   | Region | Klf3            | 16599  | 5  | 63601098  | 63627704  | + |
| 11789 | 1435278_at   | Region | 2610206C24Rik   | 67158  | 18 | 32150744  | 32151382  | - |
| 11790 | 1428212_x_at | Region | Rpl31           | 114641 | 1  | 39664836  | 39668824  | + |
| 11791 | 1433578_at   | Region | E130304D01      | 231290 | 5  | 71790031  | 71796081  | + |
| 11792 | 1437751_at   | Region | Ppargc1a        | 19017  | 5  | 50268292  | 50364500  | - |
| 11793 | 1453467_s_at | Region | Rps15a          | 267019 | 7  | 111980231 | 111992004 | - |
| 11794 | 1428705_at   | Region | 1700007K13Rik   | 69327  | 2  | 28394163  | 28398526  | - |
| 11795 | 1449172_a_at | Region | Lin7b           | 22342  | 7  | 39443916  | 39446815  | - |
| 11796 | 1450941_at   | Region | None            | None   | 4  | 6292828   | 6323429   | + |
| 11797 | 1420493_a_at | Region | Pcyt2           | 68671  | 11 | 120431180 | 120438983 | - |
| 11798 | 1440121_at   | Region | A530083M17Rik   | 320505 | 3  | 152401753 | 152402203 | - |
| 11799 | 1425494_s_at | Region | Bmpr1a          | 12166  | 14 | 32547251  | 32638735  | - |
| 11800 | 1425811_a_at | Region | Csrp1           | 13007  | 1  | 135580251 | 135598910 | + |
| 11801 | 1429192_at   | Region | Ski             | 20481  | 4  | 153649703 | 153714882 | - |
| 11802 | 1456620_at   | Region | MGC79224        | 432486 | 10 | 88350966  | 88419158  | + |

|       |              |        |               |        |      |           |           |      |
|-------|--------------|--------|---------------|--------|------|-----------|-----------|------|
| 11803 | 1448887_x_at | Region | Fxc1          | 14356  | 7    | 99755452  | 99756758  | +    |
| 11804 | 1431510_s_at | Region | 2010110K16Rik | 67899  | 9    | 118060948 | 118143996 | -    |
| 11805 | 1450735_at   | Region | 1810003N24Rik | 66249  | 11   | 17097995  | 17106346  | -    |
| 11806 | 1423622_a_at | Region | Ccnl1         | 56706  | 3    | 65619603  | 65631632  | -    |
| 11807 | 1431191_a_at | Region | Syt1          | 20979  | 10   | 108385089 | 108577499 | -    |
| 11808 | 1425803_a_at | Region | Mbd2          | 17191  | 18   | 70800857  | 70858783  | +    |
| 11809 | 1437184_at   | Region | AA407526      | 231279 | 5    | 68325793  | 68340721  | +    |
| 11810 | 1433455_at   | Region | None          | None   | 5    | 120967826 | 120969276 | -    |
| 11811 | 1434860_at   | Region | Narg3         | 93698  | 4    | 11188265  | 11189818  | -    |
| 11812 | 1449625_at   | Region | None          | None   | NONE | NONE      | NONE      | NONE |
| 11813 | 1416705_at   | Region | Rpe           | 66646  | 1    | 66993273  | 67012185  | +    |
| 11814 | 1425537_at   | Region | Ppm1a         | 19042  | 12   | 69630561  | 69641441  | +    |
| 11815 | 1429901_at   | Region | 6330571D19Rik | 432450 | 10   | 31729508  | 31730785  | -    |
| 11816 | 1429215_at   | Region | 2310058N22Rik | 71921  | 12   | 112143610 | 112144601 | +    |
| 11817 | 1435254_at   | Region | Plxnbl        | 235611 | 9    | 109142184 | 109166503 | +    |
| 11818 | 1431146_a_at | Region | Cpne8         | 66871  | 15   | 90540437  | 90732329  | -    |
| 11819 | 1425686_at   | Region | Cflar         | 12633  | 1    | 59018187  | 59060035  | +    |
| 11820 | 1427694_at   | Region | Gnrhr         | 14715  | 5    | 85444004  | 85459880  | -    |
| 11821 | 1429692_s_at | Region | Gch1          | 14528  | 14   | 42234216  | 42269658  | -    |
| 11822 | 1435383_x_at | Region | Ndn           | 17984  | 7    | 56122085  | 56123665  | +    |
| 11823 | 1456072_at   | Region | Ppp1r9a       | 243725 | 6    | 4856205   | 5118546   | +    |
| 11824 | 1421876_at   | Region | Mapk9         | 26420  | 11   | 49599595  | 49638939  | +    |
| 11825 | 1425906_a_at | Region | Sema3e        | 20349  | 5    | 13478445  | 13707444  | +    |
| 11826 | 1426122_a_at | Region | Coro6         | 216961 | 11   | 77189572  | 77195160  | +    |
| 11827 | 1444596_at   | Region | None          | None   | 4    | 138618330 | 138618741 | -    |
| 11828 | 1443070_at   | Region | Auts2         | 319974 | 5    | 130627794 | 130728707 | -    |
| 11829 | 1416578_at   | Region | Rbx1          | 56438  | 15   | 81517173  | 81527164  | +    |
| 11830 | 1437202_at   | Region | C130067A03Rik | 320713 | 4    | 93917113  | 93954172  | -    |
| 11831 | 1429671_at   | Region | 2410018M08Rik | 71970  | 5    | 129064817 | 129072750 | +    |
| 11832 | 1435923_at   | Region | Gm237         | 211488 | 10   | 67598925  | 67602736  | -    |
| 11833 | 1424456_at   | Region | Pvrl2         | 19294  | 7    | 16585905  | 16618713  | -    |
| 11834 | 1438864_at   | Region | C920006C10Rik | 76740  | 15   | 65810937  | 65897708  | +    |
| 11835 | 1450393_a_at | Region | Scamp4        | 56214  | 10   | 80733774  | 80746677  | +    |
| 11836 | 1424368_s_at | Region | Ubqln1        | 56085  | 13   | 56804764  | 56844390  | -    |
| 11837 | 1435183_at   | Region | 3110043L15Rik | 73174  | 11   | 96957260  | 96970799  | -    |
| 11838 | 1428667_at   | Region | Maoa          | 17161  | X    | 14858768  | 14924684  | +    |
| 11839 | 1434179_at   | Region | Mll3          | 231051 | 5    | 23741347  | 23769624  | -    |
| 11840 | 1428397_at   | Region | B3galt5       | 93961  | 16   | 95762296  | 95799852  | +    |
| 11841 | 1460711_at   | Region | 4930461P20Rik | 78244  | 15   | 10260892  | 10284727  | -    |
| 11842 | 1455538_at   | Region | 6330403M23Rik | 109169 | 18   | 36523201  | 36525181  | +    |
| 11843 | 1434679_at   | Region | Cspg3         | 13004  | 8    | 69246056  | 69273784  | -    |
| 11844 | 1448428_at   | Region | Nbl1          | 17965  | 4    | 137963553 | 137974126 | -    |
| 11845 | 1455079_at   | Region | A1836376      | 100737 | 5    | 72281021  | 72350725  | +    |
| 11846 | 1416216_at   | Region | Reps1         | 19707  | 10   | 18013924  | 18049606  | +    |
| 11847 | 1428223_at   | Region | Mfsd2         | 76574  | 4    | 121973962 | 121988282 | -    |
| 11848 | 1438712_at   | Region | 2010308M01Rik | 72121  | 3    | 106281879 | 106296871 | +    |
| 11849 | 1432631_at   | Region | 1190002C06Rik | 73137  | 18   | 57571393  | 57606175  | +    |
| 11850 | 1449674_s_at | Region | Pdcd6ip       | 18571  | 9    | 113708127 | 113760882 | -    |
| 11851 | 1457089_at   | Region | None          | None   | 11   | 3141987   | 3142641   | -    |
| 11852 | 1455878_at   | Region | 2700023E23Rik | 70036  | 5    | 72927647  | 72928860  | +    |
| 11853 | 1430770_at   | Region | 3110080E11Rik | 73219  | 8    | 16838586  | 16839641  | -    |
| 11854 | 1452762_at   | Region | 8430436O14Rik | 71506  | 9    | 116559671 | 116560865 | -    |
| 11855 | 1457156_at   | Region | Trhde         | 237553 | 10   | 114074464 | 114477689 | -    |
| 11856 | 1430111_a_at | Region | Bcat1         | 12035  | 6    | 145846706 | 145893811 | -    |
| 11857 | 1450258_a_at | Region | Elavl4        | 15572  | 4    | 109165070 | 109310814 | -    |
| 11858 | 1436924_x_at | Region | Rpl31         | 114641 | 1    | 39664836  | 39668824  | +    |
| 11859 | 1435358_at   | Region | Cuedc1        | 103841 | 11   | 87827241  | 87920907  | +    |
| 11860 | 1448510_at   | Region | Efna1         | 13636  | 3    | 89028209  | 89036114  | -    |
| 11861 | 1424178_at   | Region | Tmem38a       | 74166  | 8    | 71722899  | 71738144  | +    |
|       |              |        | Phgdh ///     |        |      |           |           |      |
| 11862 | 1437621_x_at | Region | LOC546010     | 236539 | 3    | 97799380  | 97826178  | -    |
| 11863 | 1418594_a_at | Region | Ncoa1         | 17977  | 12   | 3409624   | 3575830   | -    |
| 11864 | 1423449_a_at | Region | Actn4         | 60595  | 7    | 24299701  | 24368752  | -    |
| 11865 | 1433643_at   | Region | Cacna2d1      | 12293  | 5    | 14583526  | 14791513  | +    |
| 11866 | 1456995_at   | Region | 2700045P11Rik | 72555  | 16   | 10723051  | 11008542  | +    |

|       |              |        |                   |        |    |           |           |   |
|-------|--------------|--------|-------------------|--------|----|-----------|-----------|---|
| 11867 | 1452090_a_at | Region | Olfm3             | 229759 | 3  | 113850919 | 113895474 | + |
| 11868 | 1436916_at   | Region | None              | None   | 9  | 103459023 | 103459743 | - |
| 11869 | 1429310_at   | Region | Flrt3             | 71436  | 2  | 140172056 | 140185326 | - |
| 11870 | 1415985_at   | Region | Sf3b3             | 101943 | 8  | 110108214 | 110144495 | - |
| 11871 | 1419223_a_at | Region | Dtna              | 13527  | 18 | 23643946  | 23881842  | + |
| 11872 | 1438795_x_at | Region | Fkbp1a            | 14225  | 2  | 150999557 | 151018627 | + |
| 11873 | 1425560_a_at | Region | S100a16           | 67860  | 3  | 90349834  | 90350682  | + |
| 11874 | 1430303_at   | Region | 4921537D05Rik     | 77048  | 10 | 94662974  | 94764320  | + |
| 11875 | 1417660_s_at | Region | Vps29             | 56433  | 5  | 121506763 | 121515637 | + |
| 11876 | 1436503_at   | Region | BC048546          | 232400 | 6  | 129230009 | 129271784 | - |
| 11877 | 1433549_x_at | Region | Rps21             | 66481  | 2  | 179974367 | 179975394 | + |
| 11878 | 1452094_at   | Region | P4ha1             | 18451  | 10 | 59286782  | 59335753  | + |
| 11879 | 1418566_s_at | Region | Nudcd2            | 52653  | 11 | 40472609  | 40478985  | + |
| 11880 | 1451147_x_at | Region | AI481750          | 105859 | 15 | 81987653  | 82001658  | + |
| 11881 | 1416270_at   | Region | Polr2g            | 67710  | 19 | 7989676   | 7995104   | - |
| 11882 | 1460380_at   | Region | Dsg2              | 13511  | 18 | 20773051  | 20817758  | + |
| 11883 | 1437156_at   | Region | Efcbp1            | 69352  | 4  | 14879213  | 15076079  | - |
| 11884 | 1418124_at   | Region | 2610318K02Rik     | 68032  | 2  | 111986257 | 111991265 | - |
| 11885 | 1456387_at   | Region | Nol4              | 319211 | 18 | 22913931  | 23259189  | - |
| 11886 | 1457354_at   | Region | 6330509G02Rik     | 268481 | 11 | 99054185  | 99065154  | - |
| 11887 | 1423858_a_at | Region | Hmgcs2            | 15360  | 3  | 97766644  | 97796941  | + |
| 11888 | 1455042_at   | Region | Tbl1x             | 21372  | X  | 72294199  | 72320920  | + |
| 11889 | 1417468_at   | Region | Nit1              | 27045  | 1  | 171271083 | 171274465 | - |
| 11890 | 1429735_at   | Region | 1110003F05Rik     | 66145  | 17 | 8844203   | 8846425   | - |
| 11891 | 1442348_at   | Region | None              | None   | 5  | 147768531 | 147769808 | - |
| 11892 | 1435245_at   | Region | Gls2              | 216456 | 10 | 127943744 | 127946757 | + |
| 11893 | 1447676_x_at | Region | S100a16           | 67860  | 3  | 90349834  | 90350682  | + |
| 11894 | 1435583_at   | Region | 9330182L06Rik     | 231014 | 5  | 9273627   | 9491141   | + |
| 11895 | 1421328_at   | Region | Mtap2 ///         |        |    |           |           |   |
| 11895 | 1421328_at   | Region | A730034C02        | 17756  | 1  | 66613900  | 66731968  | + |
| 11896 | 1433619_at   | Region | AI894139          | 101197 | 6  | 48077721  | 48089796  | + |
| 11897 | 1424740_at   | Region | Creb3             | 12913  | 4  | 43478591  | 43482789  | + |
| 11898 | 1452214_at   | Region | Skil              | 20482  | 3  | 30508258  | 30530416  | + |
| 11899 | 1460430_at   | Region | Rap2c             | 72065  | X  | 45525090  | 45538760  | - |
| 11900 | 1457964_at   | Region | 1810044D09Rik     | 69798  | 6  | 91890127  | 91890879  | + |
| 11901 | 1434422_at   | Region | AI428479          | 98341  | 1  | 57688292  | 57689151  | + |
| 11902 | 1451163_at   | Region | Tinf2             | 28113  | 14 | 50197117  | 50199743  | - |
| 11903 | 1454045_a_at | Region | 4933424M23Rik /// |        |    |           |           |   |
| 11903 | 1454045_a_at | Region | LOC260345         | 260345 | 11 | 117821888 | 117845019 | + |
| 11904 | 1444763_at   | Region | Ptprk             | 19272  | 10 | 28105024  | 28627423  | + |
| 11905 | 1417967_at   | Region | Mms19l            | 72199  | 19 | 41488079  | 41525508  | - |
| 11906 | 1416767_a_at | Region | 1110003E01Rik     | 68552  | 5  | 64251633  | 64294659  | - |
| 11907 | 1426792_s_at | Region | Rusc2             | 100213 | 4  | 43322447  | 43343004  | + |
| 11908 | 1416640_at   | Region | Kcne1l            | 66240  | X  | 135744796 | 135746241 | - |
| 11909 | 1417765_a_at | Region | Amy1              | 11722  | 3  | 11288     | 30098     | + |
| 11910 | 1430756_at   | Region | 5430427G11Rik     | 71414  | 10 | 43326579  | 43327743  | - |
| 11911 | 1428967_at   | Region | A330103N21Rik     | 77773  | 7  | 62113386  | 62117987  | + |
| 11912 | 1460003_at   | Region | AI956758          | 99132  | 2  | 16683470  | 16684602  | + |
| 11913 | 1428333_at   | Region | 6530401D17Rik     | 76219  | X  | 129538762 | 129579883 | + |
| 11914 | 1441376_at   | Region | Gabarapl2         | 93739  | 8  | 111238426 | 111253086 | + |
| 11915 | 1436014_a_at | Region | Rusc1             | 72296  | 3  | 88827845  | 88837154  | - |
| 11916 | 1444508_s_at | Region | Arrdc1            | 215705 | 2  | 24857514  | 24867325  | - |
| 11917 | 1418057_at   | Region | Tiam1             | 21844  | 16 | 88944544  | 89118259  | - |
| 11918 | 1437375_at   | Region | None              | None   | 19 | 27001787  | 27002323  | - |
| 11919 | 1440086_at   | Region | Rnf182            | 328234 | 13 | 43178421  | 43231343  | + |
| 11920 | 1418684_at   | Region | 2310012P17Rik     | 69623  | 5  | 103619547 | 103620974 | + |
| 11921 | 1435672_at   | Region | 3830612M24        | 330635 | 7  | 111548725 | 111549404 | + |
| 11922 | 1418170_a_at | Region | Zcchc1            | 142682 | 8  | 120981449 | 121033085 | - |
| 11923 | 1426466_s_at | Region | Rps6kl1           | 238323 | 12 | 82004324  | 82019912  | - |
| 11924 | 1450248_at   | Region | Adam11            | 11488  | 11 | 102582695 | 102600123 | + |
| 11925 | 1419752_at   | Region | Nfx1              | 74164  | 4  | 41109832  | 41164029  | + |
| 11926 | 1423845_at   | Region | AI481750          | 105859 | 15 | 81987653  | 82001658  | + |
| 11927 | 1417598_a_at | Region | Fxr1h             | 14359  | 3  | 33467491  | 33516721  | + |
| 11928 | 1422694_at   | Region | Ttyh1             | 57776  | 7  | 3340443   | 3356202   | + |
| 11929 | 1417103_at   | Region | Ddt               | 13202  | 10 | 75872973  | 75875114  | - |

|       |              |        |               |        |      |           |           |      |
|-------|--------------|--------|---------------|--------|------|-----------|-----------|------|
| 11930 | 1453807_at   | Region | 6330563C09Rik | 76186  | 13   | 114438290 | 114439758 | +    |
| 11931 | 1418082_at   | Region | Nmt1          | 18107  | 11   | 102849651 | 102887194 | +    |
| 11932 | 1424768_at   | Region | Cald1         | 109624 | 6    | 34803747  | 34868362  | +    |
| 11933 | 1455955_s_at | Region | Snx17         | 266781 | 5    | 29652242  | 29657838  | +    |
| 11934 | 1436101_at   | Region | Rnf24         | 51902  | 2    | 130814673 | 130866701 | -    |
| 11935 | 1419595_a_at | Region | Ggh           | 14590  | 4    | 20143507  | 20167394  | +    |
| 11936 | 1435800_a_at | Region | Csda          | 56449  | 6    | 132143594 | 132167186 | -    |
| 11937 | 1436420_a_at | Region | Ipo4          | 75751  | 14   | 50143923  | 50153613  | -    |
| 11938 | 1440037_at   | Region | Pbx1          | 18514  | 1    | 168054563 | 168366387 | -    |
| 11939 | 1441197_at   | Region | 9530059O14Rik | 319626 | 9    | 122695338 | 122696024 | +    |
| 11940 | 1426884_at   | Region | 1110007A06Rik | 68477  | 6    | 71723228  | 71772465  | -    |
| 11941 | 1455369_at   | Region | Apba1         | 319924 | 19   | 23142625  | 23185544  | +    |
| 11942 | 1423115_at   | Region | St6galnac6    | 50935  | 2    | 32539188  | 32551693  | +    |
| 11943 | 1443401_at   | Region | Trim32        | 69807  | 4    | 64696209  | 64707429  | +    |
| 11944 | 1423828_at   | Region | Fasn          | 14104  | 11   | 120628169 | 120645157 | -    |
| 11945 | 1428940_at   | Region | Gnaq          | 14682  | 19   | 15357188  | 15609698  | +    |
| 11946 | 1436320_at   | Region | None          | None   | NONE | NONE      | NONE      | NONE |
| 11947 | 1425690_at   | Region | B3gat1        | 76898  | 9    | 26645461  | 26655237  | +    |
| 11948 | 1457988_at   | Region | Sec63         | 140740 | 10   | 42868086  | 42935647  | +    |
| 11949 | 1418322_at   | Region | Crem          | 12916  | 18   | 3271060   | 3332223   | -    |
| 11950 | 1446540_at   | Region | Kirrel3       | 67703  | 9    | 34625377  | 34626028  | +    |
| 11951 | 1435229_at   | Region | A930008A22Rik | 235283 | 9    | 40248196  | 40406053  | -    |
| 11952 | 1419759_at   | Region | Abcb1a        | 18671  | 5    | 8666835   | 8755262   | +    |
| 11953 | 1435145_at   | Region | Igsf4d        | 239857 | 16   | 65672212  | 65964483  | -    |
| 11954 | 1432263_a_at | Region | Cox7a2l       | 20463  | 17   | 81335584  | 81347955  | -    |
| 11955 | 1448142_x_at | Region | Rps13         | 68052  | 7    | 110187198 | 110189820 | -    |
| 11956 | 1435115_at   | Region | Fndc5         | 384061 | 4    | 128164173 | 128171706 | +    |
| 11957 | 1418892_at   | Region | Rhoj          | 80837  | 12   | 72164788  | 72257817  | +    |
| 11958 | 1458285_at   | Region | Gria1         | 14799  | 11   | 56764801  | 57055873  | +    |
| 11959 | 1448433_a_at | Region | Pcolce        | 18542  | 5    | 136555709 | 136561968 | -    |
| 11960 | 1456937_at   | Region | Cdh26         | 381409 | 2    | 178147565 | 178204324 | +    |
| 11961 | 1460194_at   | Region | Phyh          | 16922  | 2    | 4836302   | 4855996   | +    |
| 11962 | 1423897_at   | Region | Rnf187        | 108660 | 11   | 58657917  | 58664545  | -    |
| 11963 | 1423856_at   | Region | Popdc3        | 78977  | 10   | 45407660  | 45436490  | +    |
| 11964 | 1428392_at   | Region | Rassf2        | 215653 | 2    | 131506703 | 131543663 | -    |
| 11965 | 1434730_at   | Region | Al854517      | 101694 | 7    | 73274371  | 73331599  | +    |
| 11966 | 1436824_x_at | Region | LOC545856     | 545856 | 6    | 76842195  | 76844739  | -    |
| 11967 | 1451149_at   | Region | Pgm2          | 72157  | 4    | 98888410  | 98946194  | +    |
| 11968 | 1426410_at   | Region | Pdk3          | 236900 | X    | 88425274  | 88492753  | -    |
| 11969 | 1437109_s_at | Region | Lsm6          | 78651  | 8    | 21699568  | 21713205  | -    |
| 11970 | 1438325_at   | Region | Evi1          | 14013  | 3    | 29354762  | 29399710  | -    |
| 11971 | 1448774_at   | Region | Stoml2        | 66592  | 4    | 42943612  | 42947306  | -    |
| 11972 | 1427245_at   | Region | Arfgap1       | 228998 | 2    | 180684227 | 180699400 | +    |
| 11973 | 1428930_at   | Region | 6330540D07Rik | 76170  | X    | 143942975 | 143993536 | -    |
| 11974 | 1457177_at   | Region | Rora          | 19883  | 9    | 69474948  | 69510983  | +    |
| 11975 | 1434504_at   | Region | Zfyve28       | 231125 | 5    | 32683213  | 32683988  | -    |
| 11976 | 1416591_at   | Region | Rab34         | 19376  | 11   | 77914493  | 77917847  | +    |
| 11977 | 1429885_at   | Region | 4930431P19Rik | 73886  | 7    | 103605116 | 103605970 | +    |
| 11978 | 1433607_at   | Region | Cbln4         | 228942 | 2    | 171545069 | 171552199 | -    |
| 11979 | 1416005_at   | Region | Psmc1         | 19179  | 12   | 95551741  | 95565014  | +    |
| 11980 | 1424141_at   | Region | Hectd1        | 207304 | 3    | 48495784  | 48579550  | -    |
| 11981 | 1423056_at   | Region | Nsg1          | 18196  | 5    | 36643418  | 36665681  | -    |
| 11982 | 1449852_a_at | Region | Ehd4          | 98878  | 2    | 119603336 | 119668424 | -    |
| 11983 | 1416641_at   | Region | Lig1          | 16881  | 7    | 11271341  | 11305498  | +    |
| 11984 | 1448536_at   | Region | Lsm3          | 67678  | 6    | 91965158  | 91971745  | +    |
| 11985 | 1423951_at   | Region | Tm2d3         | 68634  | 7    | 59575395  | 59586131  | +    |
| 11986 | 1444513_at   | Region | Cnksr2        | 245684 | X    | 151420978 | 151642515 | -    |
| 11987 | 1426689_s_at | Region | Sdha          | 66945  | 13   | 70384460  | 70412084  | -    |
| 11988 | 1416539_at   | Region | Ysg2          | 22619  | 9    | 37555344  | 37589819  | +    |
| 11989 | 1451245_at   | Region | Lrrc3b        | 218763 | 14   | 13848834  | 13930422  | -    |
| 11990 | 1420592_a_at | Region | Anp32e        | 66471  | 3    | 95417123  | 95434808  | +    |
| 11991 | 1439123_at   | Region | Bhc80         | 192285 | 2    | 91918732  | 92065593  | +    |
| 11992 | 1416648_at   | Region | Dnchc1        | 13424  | 12   | 106076688 | 106142158 | +    |
| 11993 | 1436358_at   | Region | Atpaf1        | 230649 | 4    | 114743890 | 114771219 | +    |
| 11994 | 1456126_at   | Region | Malt1         | 240354 | 18   | 65664223  | 65712018  | +    |

|       |              |        |               |        |    |           |           |   |
|-------|--------------|--------|---------------|--------|----|-----------|-----------|---|
| 11995 | 1448823_at   | Region | Cxcl12        | 20315  | 6  | 117603898 | 117616686 | + |
| 11996 | 1424785_at   | Region | Angptl6       | 70726  | 9  | 20751107  | 20756927  | - |
| 11997 | 1437043_a_at | Region | 1110012M11Rik | 73711  | 8  | 70692174  | 70697270  | + |
| 11998 | 1440891_at   | Region | Gria4         | 14802  | 9  | 4328268   | 4706535   | - |
| 11999 | 1456279_a_at | Region | Bcap31        | 27061  | X  | 68346838  | 68376830  | - |
| 12000 | 1423770_at   | Region | Tmc6          | 217353 | 11 | 117587081 | 117601714 | - |
| 12001 | 1431811_a_at | Region | Fbxo34        | 78938  | 14 | 42557515  | 42616834  | + |
| 12002 | 1417707_at   | Region | B230342M21Rik | 100637 | 5  | 149512098 | 149517442 | - |
| 12003 | 1456212_x_at | Region | Socs3         | 12702  | 11 | 117787172 | 117790255 | - |
| 12004 | 1429344_at   | Region | 9.13E+15      | 74564  | 6  | 18479059  | 18480642  | - |
| 12005 | 1427227_at   | Region | Gabrg1        | 14405  | 5  | 69531953  | 69623523  | - |
| 12006 | 1438880_at   | Region | 1700012D14Rik | 75479  | 7  | 104974464 | 104975152 | - |
| 12007 | 1448913_at   | Region | Smarcd1       | 83797  | 15 | 99759546  | 99771207  | + |
| 12008 | 1434828_at   | Region | B430201A12Rik | 329739 | 3  | 108768194 | 108823063 | - |
| 12009 | 1418611_at   | Region | Gpr162        | 14788  | 6  | 125515212 | 125520685 | - |
| 12010 | 1433586_at   | Region | Rgmb          | 68799  | 17 | 13809790  | 13830123  | - |
| 12011 | 1434034_at   | Region | Cerk          | 223753 | 15 | 86189022  | 86235839  | - |
| 12012 | 1448777_at   | Region | Mcm2          | 17216  | 6  | 89318530  | 89333755  | - |
| 12013 | 1428528_at   | Region | 1110007L15Rik | 67604  | 5  | 138250433 | 138268108 | + |
| 12014 | 1450872_s_at | Region | Lip1          | 16889  | 19 | 33824007  | 33859684  | - |
| 12015 | 1450947_at   | Region | 2610528J11Rik | 66451  | 4  | 117486180 | 117489122 | + |
| 12016 | 1439697_at   | Region | I11rap        | 16180  | 16 | 25368195  | 25502925  | + |
| 12017 | 1427017_at   | Region | Satb2         | 212712 | 1  | 57097853  | 57272176  | - |
| 12018 | 1460375_at   | Region | 0610038D11Rik | 67674  | 19 | 6623999   | 6624872   | + |
| 12019 | 1436111_at   | Region | E030011K20Rik | 208613 | 3  | 27283448  | 27313750  | - |
| 12020 | 1417515_at   | Region | Lsm10         | 116748 | 4  | 125123865 | 125125693 | + |
| 12021 | 1450684_at   | Region | Etv1          | 14009  | 12 | 35383685  | 35470632  | + |
| 12022 | 1455630_at   | Region | 1700010H15Rik | 105000 | 12 | 80978687  | 81002773  | + |
| 12023 | 1426951_at   | Region | Crim1         | 50766  | 17 | 76016353  | 76192698  | + |
| 12024 | 1443643_at   | Region | T2            | 21331  | 17 | 1092      | 7498      | + |
| 12025 | 1438057_at   | Region | None          | None   | 3  | 80410446  | 80411354  | - |
| 12026 | 1428881_at   | Region | Kns2          | 16593  | 12 | 107239749 | 107276237 | + |
| 12027 | 1417193_at   | Region | Sod2          | 20656  | 17 | 11516794  | 11524420  | - |
| 12028 | 1421604_a_at | Region | Klf3          | 16599  | 5  | 63601098  | 63627704  | + |
| 12029 | 1456477_at   | Region | Ccnt1         | 12455  | 15 | 98601104  | 98626096  | - |
| 12030 | 1436110_at   | Region | None          | None   | 7  | 75413613  | 75414289  | - |
| 12031 | 1433649_at   | Region | Aof1          | 218214 | 13 | 46641719  | 46682749  | + |
| 12032 | 1435110_at   | Region | Unc5b         | 107449 | 10 | 60725176  | 60793297  | - |
| 12033 | 1460704_at   | Region | Rfng          | 19719  | 11 | 120601838 | 120605297 | - |
| 12034 | 1429447_at   | Region | Evc2          | 68525  | 5  | 35845020  | 35931569  | + |
| 12035 | 1419164_at   | Region | Zfp260        | 26466  | 7  | 25509675  | 25522233  | + |
| 12036 | 1441214_at   | Region | MGI:2443248   | 320051 | 9  | 53366823  | 53442774  | + |
| 12037 | 1438017_at   | Region | Rusc1         | 72296  | 3  | 88827845  | 88837154  | - |
| 12038 | 1435355_at   | Region | Neb           | 17996  | 2  | 52065009  | 52266643  | - |
| 12039 | 1450746_at   | Region | Keap1         | 50868  | 9  | 21116332  | 21125078  | - |
| 12040 | 1439515_at   | Region | 2900045N06Rik | 72895  | 6  | 113640716 | 113716498 | + |
| 12041 | 1421090_at   | Region | Epb4.1l1      | 13821  | 2  | 155877989 | 155997768 | + |
| 12042 | 1422803_at   | Region | Fstl3         | 83554  | 10 | 79899919  | 79904946  | + |
| 12043 | 1455078_at   | Region | None          | None   | 11 | 77183548  | 77185877  | + |
| 12044 | 1426670_at   | Region | Agrn          | 11603  | 4  | 154657652 | 154677497 | - |
| 12045 | 1441230_at   | Region | 1600019O04Rik | 72007  | 3  | 26833958  | 27060578  | - |
| 12046 | 1434606_at   | Region | Erbp3         | 13867  | 10 | 128304619 | 128305195 | - |
| 12047 | 1451611_at   | Region | Hrasls3       | 225845 | 19 | 7271359   | 7299646   | + |
| 12048 | 1434674_at   | Region | Lyst          | 17101  | 13 | 13033273  | 13222595  | + |
|       |              |        | Eno1 ///      |        |    |           |           |   |
|       |              |        | LOC433182 /// |        |    |           |           |   |
| 12049 | 1419022_a_at | Region | LOC545568     | 13806  | 4  | 148729617 | 148741237 | + |
| 12050 | 1442025_a_at | Region | None          | None   | 9  | 48679581  | 48680488  | - |
| 12051 | 1436229_at   | Region | C130065N10Rik | 319340 | 1  | 58831032  | 58831957  | - |
| 12052 | 1454487_at   | Region | 5830490A04Rik | 76126  | 10 | 63982087  | 63983298  | - |
| 12053 | 1438941_x_at | Region | Ampd2         | 109674 | 3  | 107869804 | 107882369 | - |
| 12054 | 1415787_at   | Region | Ganab         | 14376  | 19 | 8094658   | 8113213   | + |
| 12055 | 1424083_at   | Region | Rod1          | 230257 | 4  | 59418515  | 59492735  | - |
| 12056 | 1451247_at   | Region | Mfsd1         | 66868  | 3  | 67255079  | 67276542  | + |
| 12057 | 1450899_at   | Region | Nedd1         | 17997  | 10 | 92653242  | 92690856  | - |

|       |              |        |                   |        |      |           |           |      |
|-------|--------------|--------|-------------------|--------|------|-----------|-----------|------|
| 12058 | 1433829_a_at | Region | Hnrpa2b1          | 53379  | 6    | 51608402  | 51617123  | -    |
| 12059 | 1441629_at   | Region | B130020M22Rik     | 320217 | 10   | 119083490 | 119083894 | +    |
| 12060 | 1426495_at   | Region | 2410042D21Rik     | 72425  | 2    | 112002449 | 112037475 | +    |
| 12061 | 1448956_at   | Region | Stard10           | 56018  | 7    | 95423673  | 95452600  | +    |
| 12062 | 1452177_at   | Region | Abcf3             | 27406  | 16   | 19320803  | 19332961  | +    |
| 12063 | 1420880_a_at | Region | Ywhab             | 54401  | 2    | 163452166 | 163475556 | +    |
| 12064 | 1434826_at   | Region | Al256775          | 218341 | 13   | 72059883  | 72075496  | -    |
| 12065 | 1436449_at   | Region | None              | None   | X    | 115260331 | 115260889 | +    |
| 12066 | 1419653_a_at | Region | Ndx5              | 13207  | 11   | 106602635 | 106609565 | -    |
| 12067 | 1456116_at   | Region | Catnd2            | 18163  | 15   | 30163743  | 31021141  | +    |
| 12068 | 1460197_a_at | Region | Steap4            | 117167 | 5    | 7968888   | 7990629   | +    |
| 12069 | 1456531_x_at | Region | Prp19             | 28000  | 19   | 10091789  | 10102029  | +    |
| 12070 | 1454896_at   | Region | None              | None   | 5    | 52466436  | 52467501  | +    |
| 12071 | 1422625_at   | Region | Ly6h              | 23934  | 15   | 75615042  | 75616905  | -    |
| 12072 | 1421154_at   | Region | Hcn2              | 15166  | 10   | 79839258  | 79858732  | +    |
| 12073 | 1424711_at   | Region | Tmem2             | 83921  | 19   | 21045338  | 21094911  | +    |
| 12074 | 1446803_at   | Region | Dock9             | 105445 | 14   | 116113166 | 116206323 | -    |
| 12075 | 1437843_s_at | Region | Nupl1             | 71844  | 14   | 54755759  | 54787669  | -    |
| 12076 | 1429981_a_at | Region | 4933426K21Rik     | 108653 | 6    | 123118089 | 123137380 | -    |
| 12077 | 1428307_at   | Region | Zdhhc13           | 243983 | 7    | 42903847  | 42942281  | +    |
| 12078 | 1433645_at   | Region | 2210409B22Rik     | 70174  | 4    | 53482109  | 53483675  | +    |
| 12079 | 1417124_at   | Region | Dstn              | 56431  | 2    | 143372547 | 143400260 | +    |
| 12080 | 1428510_at   | Region | Lphn1             | 330814 | 8    | 83175087  | 83200065  | +    |
| 12081 | 1436475_at   | Region | Nr2f2             | 11819  | 7    | 64237865  | 64245019  | -    |
| 12082 | 1424117_at   | Region | BC056474          | 414077 | 8    | 84351649  | 84353025  | +    |
| 12083 | 1436158_at   | Region | Eif4ebp2          | 13688  | 10   | 61397930  | 61418102  | -    |
| 12084 | 1452603_at   | Region | 5330431N19Rik     | 226162 | 19   | 45108051  | 45125723  | +    |
| 12085 | 1426508_at   | Region | Gfap              | 14580  | 11   | 102709766 | 102718169 | -    |
| 12086 | 1416895_at   | Region | Efna1             | 13636  | 3    | 89028209  | 89036114  | -    |
| 12087 | 1423371_at   | Region | Pole4             | 66979  | 6    | 82990518  | 82996671  | -    |
| 12088 | 1426955_at   | Region | Col18a1           | 12822  | 10   | 77153138  | 77270740  | -    |
| 12089 | 1435752_s_at | Region | Abcc9             | 20928  | 6    | 143432402 | 143545542 | -    |
| 12090 | 1426263_at   | Region | Igsf4c            | 260299 | 7    | 19674773  | 19680043  | +    |
| 12091 | 1444291_at   | Region | 4930506D23Rik     | 75099  | 7    | 61113618  | 61119077  | +    |
| 12092 | 1452642_at   | Region | None              | None   | 15   | 95891608  | 95897370  | -    |
| 12093 | 1443253_at   | Region | None              | None   | NONE | NONE      | NONE      | NONE |
| 12094 | 1435096_at   | Region | BC051080          | 237422 | 10   | 84812276  | 84911107  | +    |
| 12095 | 1455171_at   | Region | Suv420h1          | 225888 | 19   | 3556211   | 3605181   | +    |
| 12096 | 1445966_at   | Region | Igf2r             | 16004  | 17   | 11321447  | 11408701  | -    |
| 12097 | 1426620_at   | Region | Chst10            | 98388  | 1    | 39160793  | 39194909  | -    |
| 12098 | 1449944_a_at | Region | Sec61a2           | 57743  | 2    | 5788259   | 5812625   | -    |
| 12099 | 1448766_at   | Region | Gjb1              | 14618  | X    | 95982922  | 95986986  | +    |
| 12100 | 1433541_a_at | Region | Ubp2l             | 74383  | 3    | 89810481  | 89862883  | -    |
| 12101 | 1439541_at   | Region | 4930414L22Rik     | 78108  | 6    | 72772008  | 72772590  | +    |
| 12102 | 1450814_a_at | Region | Ipo4              | 75751  | 14   | 50143923  | 50153613  | -    |
| 12103 | 1448293_at   | Region | Ebf1              | 13591  | 11   | 44370971  | 44758012  | +    |
| 12104 | 1454990_at   | Region | Arid2             | 77044  | 15   | 96436802  | 96469595  | +    |
| 12105 | 1416760_at   | Region | Galnt1            | 108760 | 12   | 77379532  | 77465731  | +    |
| 12106 | 1437031_at   | Region | Acsl6             | 216739 | 11   | 54057075  | 54114371  | +    |
| 12107 | 1433110_at   | Region | 5830474E16Rik     | 76094  | 1    | 22178810  | 22180166  | -    |
| 12108 | 1452807_s_at | Region | 1500016O10Rik     | 68952  | 7    | 120873047 | 120879946 | +    |
| 12109 | 1415819_a_at | Region | Ppp2r1a           | 51792  | 17   | 18817271  | 18837722  | +    |
| 12110 | 1434015_at   | Region | Slc2a6            | 227659 | 2    | 26953530  | 26960152  | -    |
| 12111 | 1429451_at   | Region | 2610301B20Rik     | 67157  | 4    | 10801573  | 10826390  | +    |
| 12112 | 1417593_at   | Region | Tusc2             | 80385  | 9    | 107629036 | 107631889 | +    |
| 12113 | 1441161_at   | Region | B230216G23Rik     | 319552 | 6    | 143257089 | 143262999 | +    |
| 12114 | 1439549_at   | Region | Gm368             | 208748 | X    | 66623279  | 66633373  | +    |
| 12115 | 1436754_at   | Region | Al839735          | 104885 | 12   | 107979577 | 107990559 | -    |
| 12116 | 1455539_at   | Region | None              | None   | 13   | 24467360  | 24470251  | -    |
| 12117 | 1455190_at   | Region | Gng7              | 14708  | 10   | 81080086  | 81084486  | -    |
| 12118 | 1452844_at   | Region | Pou6f1            | 19009  | 15   | 100632856 | 100643903 | -    |
| 12119 | 1454775_at   | Region | Hdac10            | 170787 | 15   | 89175231  | 89180553  | -    |
| 12120 | 1428447_at   | Region | Tmem14a           | 75712  | 1    | 21442755  | 21454142  | +    |
| 12121 | 1419472_s_at | Region | Nudc /// Nudc-ps1 | 18221  | 4    | 132493443 | 132506848 | -    |
| 12122 | 1436892_at   | Region | Spred2            | 114716 | 11   | 19819235  | 19917390  | +    |



|       |              |        |               |        |      |           |           |      |
|-------|--------------|--------|---------------|--------|------|-----------|-----------|------|
| 12123 | 1436839_at   | Region | None          | None   | 12   | 28984449  | 28985321  | +    |
| 12124 | 1451689_a_at | Region | Sox10         | 20665  | 15   | 79206217  | 79275996  | -    |
| 12125 | 1435178_x_at | Region | Anapc5        | 59008  | 5    | 121940636 | 121974194 | -    |
| 12126 | 1448982_at   | Region | Prss18        | 19144  | 7    | 37900849  | 37907331  | +    |
| 12127 | 1422506_a_at | Region | Cstb          | 13014  | 10   | 78536450  | 78538362  | +    |
| 12128 | 1456333_a_at | Region | Arhgap6       | 11856  | X    | 162395378 | 162903843 | +    |
| 12129 | 1459850_x_at | Region | Glrb          | 14658  | 3    | 80572600  | 80642620  | -    |
| 12130 | 1415782_at   | Region | Sumo2         | 170930 | 11   | 115344202 | 115357323 | -    |
| 12131 | 1425788_a_at | Region | Echdc2        | 52430  | 4    | 107124401 | 107138212 | +    |
| 12132 | 1427985_at   | Region | 9630042H07Rik | 270624 | X    | 89623871  | 89628043  | -    |
| 12133 | 1422530_at   | Region | Prph1         | 19132  | 15   | 99113134  | 99116597  | +    |
| 12134 | 1460387_a_at | Region | Ysg2          | 22619  | 9    | 37555344  | 37589819  | +    |
| 12135 | 1430346_at   | Region | 5730507A09Rik | 70638  | 7    | 58642774  | 58657690  | -    |
| 12136 | 1418574_a_at | Region | Shfdg1        | 20422  | 6    | 6531045   | 6551349   | -    |
| 12137 | 1448196_at   | Region | Mat2b         | 108645 | 11   | 40418255  | 40431554  | -    |
| 12138 | 1419745_at   | Region | Arhgap23      | 58996  | 11   | 97311160  | 97323487  | +    |
| 12139 | 1437991_x_at | Region | Rusc1         | 72296  | 3    | 88827845  | 88837154  | -    |
| 12140 | 1433464_at   | Region | Ipo13         | 230673 | 4    | 116853398 | 116873904 | -    |
| 12141 | 1451105_at   | Region | B130052G07Rik | 226841 | 1    | 190684016 | 190715465 | -    |
| 12142 | 1425277_at   | Region | Slit1         | 20562  | 19   | 41144631  | 41288228  | -    |
| 12143 | 1448625_at   | Region | Golga2        | 99412  | 2    | 32220518  | 32240075  | +    |
| 12144 | 1452980_at   | Region | 2810468N07Rik | 72834  | 17   | 23376562  | 23380720  | +    |
| 12145 | 1434714_at   | Region | Ero1lb        | 67475  | 13   | 203       | 5259      | -    |
| 12146 | 1447898_s_at | Region | Sfrs6         | 67996  | 2    | 162388514 | 162394090 | +    |
| 12147 | 1434444_s_at | Region | None          | None   | 2    | 128124162 | 128125728 | -    |
| 12148 | 1426235_a_at | Region | Glul          | 14645  | 1    | 153783869 | 153793637 | +    |
| 12149 | 1450005_x_at | Region | Egfl9         | 106565 | 17   | 43807132  | 43812952  | +    |
| 12150 | 1435869_s_at | Region | Ap2a2         | 11772  | 7    | 135965073 | 136035847 | +    |
| 12151 | 1435280_at   | Region | Al452195      | 105178 | 13   | 106203504 | 106205191 | +    |
| 12152 | 1434723_at   | Region | None          | None   | 10   | 39691327  | 39801885  | -    |
| 12153 | 1439342_at   | Region | Clpx          | 270166 | 9    | 65416574  | 65452907  | +    |
| 12154 | 1449563_at   | Region | Cntn1         | 12805  | 15   | 92196046  | 92407969  | +    |
| 12155 | 1433765_at   | Region | B230113M03Rik | 217342 | 11   | 116358846 | 116402540 | -    |
| 12156 | 1432270_a_at | Region | Chmp5         | 76959  | 4    | 41087404  | 41104153  | +    |
| 12157 | 1451484_a_at | Region | Syn1          | 20964  | X    | 19099459  | 19159931  | -    |
| 12158 | 1424275_s_at | Region | Trim41        | 211007 | 11   | 48559241  | 48570190  | -    |
| 12159 | 1434666_at   | Region | Pcgf5         | 76073  | 19   | 35721737  | 35798874  | +    |
| 12160 | 1451025_at   | Region | Arl1          | 104303 | 10   | 88703486  | 88716220  | +    |
| 12161 | 1418327_at   | Region | 1110058L19Rik | 68002  | 1    | 24240602  | 24250296  | -    |
| 12162 | 1451451_at   | Region | Gca           | 227960 | 2    | 62519727  | 62549509  | +    |
| 12163 | 1423462_at   | Region | Map3k7ip2     | 68652  | 10   | 7771623   | 7790347   | -    |
| 12164 | 1422473_at   | Region | Pde4b         | 18578  | 4    | 101213908 | 101564744 | +    |
| 12165 | 1444778_at   | Region | 38598         | 24050  | 15   | 82325610  | 82342778  | +    |
| 12166 | 1422314_at   | Region | Clcn6         | 26372  | 4    | 146498846 | 146531129 | -    |
| 12167 | 1415727_at   | Region | Apoa1bp       | 246703 | 3    | 87800387  | 87802359  | -    |
| 12168 | 1458156_at   | Region | E230012J19Rik | 319664 | 4    | 148909732 | 148910382 | +    |
| 12169 | 1452961_at   | Region | 1200009O22Rik | 66873  | 6    | 53959793  | 53965019  | -    |
| 12170 | 1434848_at   | Region | Gpr27         | 14761  | 6    | 100160874 | 100162013 | +    |
| 12171 | 1449514_at   | Region | Gprk5         | 14773  | 19   | 6912      | 30724     | -    |
| 12172 | 1448791_at   | Region | Snx5          | 69178  | 2    | 143707062 | 143727467 | -    |
| 12173 | 1423591_at   | Region | Fgfr1op2      | 67529  | 6    | 147498625 | 147519880 | +    |
| 12174 | 1421498_a_at | Region | 2010204K13Rik | 68355  | NONE | NONE      | NONE      | NONE |
| 12175 | 1455110_at   | Region | None          | None   | 3    | 94669597  | 94671651  | -    |
| 12176 | 1428889_at   | Region | 1810020C19Rik | 69113  | 2    | 93685235  | 93715406  | -    |
| 12177 | 1438848_at   | Region | Osbp          | 76303  | 19   | 11155242  | 11190607  | +    |
| 12178 | 1416659_at   | Region | Eif3s10       | 13669  | 19   | 60361493  | 60391011  | -    |
| 12179 | 1415689_s_at | Region | Zfp306        | 72739  | 13   | 20867145  | 20884810  | -    |
| 12180 | 1429418_at   | Region | Cdc14b        | 218294 | 13   | 61579944  | 61659178  | -    |
| 12181 | 1434840_at   | Region | Hrb           | 15463  | 1    | 83168589  | 83225381  | +    |
| 12182 | 1416208_at   | Region | Usp14         | 59025  | 18   | 10040776  | 10075422  | -    |
| 12183 | 1432408_a_at | Region | B230208H21    | 330549 | 7    | 54974364  | 55091137  | -    |
| 12184 | 1452299_at   | Region | Wwp1          | 107568 | 4    | 19537563  | 19635959  | -    |
| 12185 | 1431372_at   | Region | Srpk2         | 20817  | 5    | 21967253  | 22080468  | -    |
| 12186 | 1438829_at   | Region | Gm96          | 225743 | 18   | 77584095  | 77687047  | -    |
| 12187 | 1448923_at   | Region | Prkra         | 23992  | 2    | 76327686  | 76345743  | -    |

|       |              |        |               |        |    |           |           |   |
|-------|--------------|--------|---------------|--------|----|-----------|-----------|---|
| 12188 | 1416709_a_at | Region | AW552001      | 83485  | 7  | 74061151  | 74065438  | + |
| 12189 | 1417142_at   | Region | 4932442K08Rik | 67544  | 17 | 13399931  | 13435680  | + |
| 12190 | 1420575_at   | Region | Mt3           | 17751  | 8  | 93436916  | 93438303  | + |
| 12191 | 1448307_at   | Region | Dscr2         | 56088  | 16 | 95417359  | 95428307  | - |
| 12192 | 1460677_at   | Region | None          | None   | 15 | 99184511  | 99271018  | + |
| 12193 | 1424441_at   | Region | Slc27a4       | 26569  | 2  | 29734842  | 29749684  | + |
| 12194 | 1427831_s_at | Region | Zfp260        | 26466  | 7  | 25509675  | 25522233  | + |
| 12195 | 1426037_a_at | Region | Rgs16         | 19734  | 1  | 153624984 | 153630102 | + |
| 12196 | 1439817_at   | Region | 2900064A13Rik | 73024  | 2  | 112078263 | 112090674 | + |
| 12197 | 1417780_at   | Region | Lass4         | 67260  | 8  | 3848044   | 3880287   | + |
| 12198 | 1416321_s_at | Region | Prelp         | 116847 | 1  | 133761069 | 133772168 | - |
| 12199 | 1426971_at   | Region | Ube1l         | 74153  | 9  | 108043554 | 108052043 | + |
| 12200 | 1451114_at   | Region | Cklfsf6       | 67213  | 9  | 114704736 | 114722975 | + |
| 12201 | 1434523_x_at | Region | Eif3s6        | 16341  | 15 | 43195901  | 43228545  | - |
| 12202 | 1417846_at   | Region | Ulk2          | 29869  | 11 | 61501302  | 61580259  | - |
| 12203 | 1439764_s_at | Region | C330012H03Rik | 319765 | 16 | 20832300  | 20935863  | - |
| 12204 | 1434210_s_at | Region | Lrig1         | 16206  | 6  | 95066417  | 95161798  | - |
| 12205 | 1419673_at   | Region | Spock1        | 20745  | 13 | 56048889  | 56210903  | - |
| 12206 | 1424093_x_at | Region | Cd151         | 12476  | 7  | 135869384 | 135873464 | + |
| 12207 | 1455231_s_at | Region | Apc2          | 23805  | 10 | 80426747  | 80441034  | + |
| 12208 | 1452874_at   | Region | 2510003E04Rik | 72320  | 10 | 62524855  | 62544796  | - |
| 12209 | 1456413_at   | Region | 9430063L05Rik | 229622 | 3  | 97225124  | 97254244  | - |
| 12210 | 1420666_at   | Region | Doc2b         | 13447  | 11 | 75494748  | 75521715  | - |
| 12211 | 1450853_at   | Region | Tle4          | 21888  | 19 | 13671934  | 13821845  | - |
| 12212 | 1426880_at   | Region | BC026657      | 208618 | 2  | 20552057  | 20852534  | + |
| 12213 | 1417985_at   | Region | Nrarp         | 67122  | 2  | 25113185  | 25115487  | + |
| 12214 | 1435359_at   | Region | BC060632      | 244654 | 8  | 110019206 | 110039122 | + |
| 12215 | 1460276_a_at | Region | Gpr175        | 24100  | 6  | 89279841  | 89347284  | + |
| 12216 | 1435195_at   | Region | D930046M13Rik | 104880 | 12 | 83567774  | 83569620  | + |
| 12217 | 1450081_x_at | Region | Gpi1          | 14751  | 7  | 29355949  | 29384053  | - |
| 12218 | 1459358_at   | Region | Pkp2          | 67451  | 16 | 14981080  | 15040447  | + |
| 12219 | 1456250_x_at | Region | Tgfb1         | 21810  | 13 | 55229952  | 55259688  | + |
| 12220 | 1444923_at   | Region | None          | None   | 12 | 71742721  | 71743618  | - |
| 12221 | 1415794_a_at | Region | Spin          | 20729  | 13 | 67875489  | 67920302  | - |
| 12222 | 1460008_x_at | Region | Rpl31         | 114641 | 1  | 39664836  | 39668824  | + |
| 12223 | 1448788_at   | Region | Cd200         | 17470  | 16 | 44266133  | 44292916  | - |
| 12224 | 1436908_at   | Region | Pcm1          | 18536  | 8  | 40177407  | 40269978  | + |
| 12225 | 1434002_at   | Region | Ches1         | 71375  | 12 | 94622265  | 94816088  | - |
| 12226 | 1442704_at   | Region | None          | None   | 2  | 59877948  | 59878354  | - |
| 12227 | 1450428_at   | Region | Lhx1          | 16869  | 11 | 84247371  | 84253526  | - |
| 12228 | 1457568_at   | Region | C230004L04    | 330135 | 5  | 98975085  | 98975685  | - |
| 12229 | 1446805_at   | Region | Gabra2        | 14395  | 5  | 69741965  | 69877243  | - |
| 12230 | 1438858_x_at | Region | H2-Aa         | 14960  | 17 | 31984134  | 31989153  | - |
| 12231 | 1421028_a_at | Region | Mef2c         | 17260  | 13 | 79604158  | 79763912  | + |
| 12232 | 1436828_a_at | Region | Tpd52l2       | 66314  | 2  | 181214210 | 181233714 | + |
| 12233 | 1424132_at   | Region | Hras1         | 15461  | 7  | 135593335 | 135594927 | - |
| 12234 | 1442415_at   | Region | 5830454E08Rik | 76100  | 9  | 120589590 | 120609801 | + |
| 12235 | 1451762_a_at | Region | Kif1b         | 16561  | 4  | 147668683 | 147799980 | - |
| 12236 | 1417503_at   | Region | Rfc2          | 19718  | 5  | 93150     | 108790    | - |
| 12237 | 1423728_at   | Region | Eif3s6ip      | 223691 | 15 | 79126509  | 79145686  | + |
| 12238 | 1422078_at   | Region | Akt3          | 23797  | 1  | 176955410 | 177064396 | - |
| 12239 | 1458575_at   | Region | Setbp1        | 240427 | 18 | 78876677  | 79209594  | - |
| 12240 | 1457589_at   | Region | D430038H04Rik | 270120 | 9  | 15750373  | 15766277  | - |
| 12241 | 1448005_at   | Region | Sash1         | 70097  | 10 | 8593638   | 8757302   | - |
| 12242 | 1421141_a_at | Region | Foxp1         | 108655 | 6  | 99395348  | 99630926  | - |
| 12243 | 1437413_x_at | Region | Rps29         | 20090  | 12 | 65989514  | 65990859  | - |
| 12244 | 1439194_at   | Region | C030048H21Rik | 77481  | 2  | 26175614  | 26176728  | - |
| 12245 | 1424897_at   | Region | Gpr85         | 64450  | 6  | 13822022  | 13826799  | - |
| 12246 | 1434537_at   | Region | Slco3a1       | 108116 | 7  | 68181298  | 68451736  | - |
| 12247 | 1425628_a_at | Region | Gtf2i         | 14886  | 5  | 133529235 | 133606084 | - |
| 12248 | 1423729_a_at | Region | 2500002L14Rik | 66510  | 6  | 72691688  | 72694355  | - |
| 12249 | 1433834_at   | Region | 38417         | 223455 | 15 | 31457571  | 31531643  | - |
| 12250 | 1458341_x_at | Region | None          | None   | 3  | 121650632 | 121650889 | + |
| 12251 | 1460650_at   | Region | Atp6v0a1      | 11975  | 11 | 100830569 | 100884801 | + |
| 12252 | 1419238_at   | Region | Abca7         | 27403  | 10 | 80120249  | 80138206  | + |

|       |              |        |                    |        |    |           |           |   |
|-------|--------------|--------|--------------------|--------|----|-----------|-----------|---|
| 12253 | 1428636_at   | Region | Steap2             | 74051  | 5  | 5676943   | 5699766   | - |
| 12254 | 1444523_s_at | Region | Ube2v1             | 66589  | 2  | 167064579 | 167088725 | - |
| 12255 | 1457401_at   | Region | Dnahc9             | 237806 | 11 | 65556977  | 65846480  | - |
| 12256 | 1456759_at   | Region | 6430556C10Rik      | 241568 | 2  | 97172340  | 97336347  | + |
| 12257 | 1452207_at   | Region | None               | None   | 10 | 17647349  | 17649770  | + |
| 12258 | 1428201_at   | Region | 2310036O22Rik      | 68544  | 8  | 84297511  | 84300924  | + |
| 12259 | 1455142_at   | Region | Socs4              | 67296  | 14 | 42361847  | 42376298  | + |
| 12260 | 1418752_at   | Region | Aldh3a1            | 11670  | 11 | 60934387  | 60944056  | + |
| 12261 | 1426490_at   | Region | Bfar               | 67118  | 16 | 12408146  | 12438648  | + |
| 12262 | 1428948_at   | Region | 5730414M22Rik      | 70528  | 14 | 21670471  | 21672182  | - |
| 12263 | 1427923_at   | Region | Zmpste24           | 230709 | 4  | 120081682 | 120120687 | - |
| 12264 | 1427151_at   | Region | 4732486I23Rik      | 99003  | 2  | 104462387 | 104521514 | - |
| 12265 | 1424177_at   | Region | Tmem38a            | 74166  | 8  | 71722899  | 71738144  | + |
| 12266 | 1425329_a_at | Region | Dia1               | 109754 | 15 | 83204176  | 83222883  | - |
| 12267 | 1426994_at   | Region | Phlpp              | 98432  | 1  | 106112969 | 106335347 | + |
| 12268 | 1431007_at   | Region | LOC381062          | 381062 | 17 | 13026322  | 13036818  | + |
| 12269 | 1417904_at   | Region | Dcre1a             | 55947  | 19 | 56114717  | 56132771  | - |
| 12270 | 1448545_at   | Region | Sdc2               | 15529  | 15 | 32919852  | 33033850  | + |
| 12271 | 1424976_at   | Region | Rhov               | 228543 | 2  | 118783050 | 118785078 | - |
| 12272 | 1416381_a_at | Region | Prdx5              | 54683  | 19 | 6620667   | 6623493   | - |
| 12273 | 1460561_x_at | Region | Sepw1              | 20364  | 7  | 4226      | 7136      | - |
| 12274 | 1436760_a_at | Region | Rps8               | 20116  | 4  | 116112741 | 116115037 | - |
| 12275 | 1440350_at   | Region | None               | None   | 15 | 89121846  | 89122825  | + |
| 12276 | 1435094_at   | Region | Kcnj16             | 16517  | 11 | 110789161 | 110849057 | + |
| 12277 | 1434701_at   | Region | AW215868           | 104611 | 11 | 60283372  | 60283948  | + |
| 12278 | 1454922_at   | Region | AI553587           | 103784 | 11 | 17106711  | 17128589  | + |
| 12279 | 1428538_s_at | Region | Rarres2            | 71660  | 6  | 48702577  | 48705549  | - |
| 12280 | 1418468_at   | Region | Anxa11             | 11744  | 14 | 24217620  | 24262677  | + |
| 12281 | 1457266_at   | Region | AW322671           | 105016 | 12 | 70199679  | 70200254  | + |
| 12282 | 1450440_at   | Region | Gfra1              | 14585  | 19 | 57822423  | 58054639  | - |
| 12283 | 1428158_at   | Region | Akt1s1             | 67605  | 7  | 38924155  | 38930338  | + |
| 12284 | 1426264_at   | Region | Dlat               | 235339 | 9  | 50706961  | 50732106  | - |
| 12285 | 1454142_a_at | Region | Pwp1               | 103136 | 10 | 85832809  | 85850040  | + |
| 12286 | 1427773_a_at | Region | Rabac1             | 14470  | 7  | 20146731  | 20149637  | - |
| 12287 | 1447979_at   | Region | Rutbc2             | 52850  | 5  | 112319917 | 112387408 | - |
| 12288 | 1423307_s_at | Region | Tgoln1 /// Tgoln2  | 22134  | 6  | 72943992  | 72950517  | - |
| 12289 | 1451295_a_at | Region | Chd4               | 107932 | 6  | 125752167 | 125786488 | + |
| 12290 | 1448379_at   | Region | Pot1               | 101185 | 6  | 25788490  | 25853950  | - |
| 12291 | 1435668_at   | Region | None               | None   | 17 | 13436445  | 13437236  | + |
| 12292 | 1448111_at   | Region | Ctps2              | 55936  | X  | 156501010 | 156631724 | + |
| 12293 | 1436501_at   | Region | Mtus1              | 102103 | 8  | 39926813  | 40021115  | - |
| 12294 | 1417004_at   | Region | Tsg101             | 22088  | 7  | 40975338  | 41005870  | - |
| 12295 | 1429862_at   | Region | 2310026J01Rik      | 329502 | 2  | 119686022 | 119758931 | - |
| 12296 | 1430603_at   | Region | 4930579K19Rik      | 75881  | 9  | 98461587  | 98462950  | - |
| 12297 | 1435048_at   | Region | AI854703           | 243373 | 6  | 48760814  | 48766567  | + |
|       |              |        | Rps2 ///           |        |    |           |           |   |
|       |              |        | LOC193707 ///      |        |    |           |           |   |
|       |              |        | LOC232534 ///      |        |    |           |           |   |
|       |              |        | LOC243642 ///      |        |    |           |           |   |
|       |              |        | LOC380872 ///      |        |    |           |           |   |
|       |              |        | LOC381086 ///      |        |    |           |           |   |
|       |              |        | LOC432878 ///      |        |    |           |           |   |
|       |              |        | LOC433715 ///      |        |    |           |           |   |
|       |              |        | LOC434084 ///      |        |    |           |           |   |
|       |              |        | LOC436484 ///      |        |    |           |           |   |
|       |              |        | LOC544872 ///      |        |    |           |           |   |
|       |              |        | LOC545808 ///      |        |    |           |           |   |
|       |              |        | LOC546164 ///      |        |    |           |           |   |
|       |              |        | LOC546298 ///      |        |    |           |           |   |
| 12298 | 1431765_a_at | Region | LOC546797          | 16898  | 17 | 22525236  | 22527051  | + |
| 12299 | 1416159_at   | Region | Nr2f2              | 11819  | 7  | 64237865  | 64245019  | - |
| 12300 | 1429532_at   | Region | Morc2a             | 74522  | 11 | 3553487   | 3585159   | + |
| 12301 | 1424702_a_at | Region | 2410024A21Rik      | 76559  | 12 | 101063610 | 101094310 | - |
| 12302 | 1459986_a_at | Region | Rps17              | 20068  | 7  | 75150291  | 75152774  | - |
| 12303 | 1456606_a_at | Region | Chst11 /// Phactr1 | 218194 | 13 | 42242828  | 42700966  | + |

|       |              |        |               |        |    |           |           |   |
|-------|--------------|--------|---------------|--------|----|-----------|-----------|---|
| 12304 | 1441325_at   | Region | 9430034D17Rik | 77286  | X  | 31508160  | 31510142  | - |
| 12305 | 1452834_at   | Region | 2600010E01Rik | 72446  | 2  | 101420931 | 101502300 | - |
| 12306 | 1452780_at   | Region | Gtf3c2        | 71752  | 5  | 29615739  | 29638859  | - |
| 12307 | 1416072_at   | Region | Cd34          | 12490  | 1  | 194679286 | 194701657 | + |
| 12308 | 1441430_at   | Region | None          | None   | 3  | 129567099 | 129567575 | + |
| 12309 | 1423880_at   | Region | D10Wsu52e     | 28088  | 10 | 85899581  | 85918735  | - |
| 12310 | 1436745_at   | Region | Scyl1bp1      | 98376  | 1  | 163300126 | 163318858 | - |
| 12311 | 1434405_at   | Region | A730024A03Rik | 216742 | 11 | 54191030  | 54271077  | + |
| 12312 | 1435975_at   | Region | AI115600      | 102442 | 9  | 65003770  | 65041605  | + |
| 12313 | 1451154_a_at | Region | Cugbp2        | 14007  | 2  | 6459141   | 6638885   | - |
| 12314 | 1420842_at   | Region | Ptpnf         | 19268  | 4  | 117168706 | 117236351 | - |
| 12315 | 1455141_at   | Region | Tnrc6a        | 233833 | 7  | 117180427 | 117250357 | + |
| 12316 | 1448387_at   | Region | Rbx1          | 56438  | 15 | 81517173  | 81527164  | + |
| 12317 | 1415688_at   | Region | Ube2g1        | 67128  | 11 | 72333039  | 72409965  | + |
| 12318 | 1433997_at   | Region | 2410127E18Rik | 76788  | 6  | 30449002  | 30501701  | + |
| 12319 | 1416237_at   | Region | Eva1          | 14012  | 9  | 45031412  | 45042867  | + |
| 12320 | 1456602_at   | Region | 4932417116Rik | 234740 | 8  | 111209596 | 111211461 | - |
| 12321 | 1424365_at   | Region | 1810037117Rik | 67704  | X  | 1870      | 3216      | - |
| 12322 | 1427476_a_at | Region | Trim32        | 69807  | 4  | 64696209  | 64707429  | + |
| 12323 | 1456213_x_at | Region | Qars          | 97541  | 9  | 108556974 | 108564815 | + |
| 12324 | 1415683_at   | Region | Nmt1          | 18107  | 11 | 102849651 | 102887194 | + |
| 12325 | 1419509_a_at | Region | Nagk          | 56174  | 6  | 84139275  | 84146789  | + |
| 12326 | 1419210_at   | Region | Hrh1          | 15465  | 6  | 114980341 | 115054903 | + |
| 12327 | 1426961_at   | Region | 6820402O20Rik | 228829 | 2  | 155653612 | 155764373 | + |
| 12328 | 1426451_at   | Region | 6030465E24Rik | 214585 | 2  | 121567379 | 121632227 | - |
| 12329 | 1416002_x_at | Region | Cotl1         | 72042  | 8  | 119165392 | 119197206 | - |
| 12330 | 1424442_a_at | Region | Pja2          | 224938 | 17 | 61986425  | 62035635  | - |
| 12331 | 1435784_at   | Region | Atg9l1        | 245860 | 1  | 75468642  | 75479736  | - |
| 12332 | 1421095_a_at | Region | Trpc1         | 22063  | 9  | 95610171  | 95653902  | - |
| 12333 | 1415895_at   | Region | Snrpn         | 20646  | 7  | 53759592  | 53781697  | - |
| 12334 | 1449388_at   | Region | Thbs4         | 21828  | 13 | 88935778  | 88978946  | - |
| 12335 | 1424200_s_at | Region | Seh1l         | 72124  | 18 | 68005761  | 68023379  | + |
| 12336 | 1452330_a_at | Region | Mxra8         | 74761  | 4  | 154332120 | 154336450 | + |
| 12337 | 1439459_x_at | Region | Acly          | 104112 | 11 | 100297443 | 100348988 | - |
| 12338 | 1434515_at   | Region | Ncoa1         | 17977  | 12 | 3409624   | 3575830   | - |
| 12339 | 1427445_a_at | Region | Ttn           | 22138  | 2  | 76401836  | 76406317  | - |
| 12340 | 1422869_at   | Region | Mertk         | 17289  | 2  | 128212850 | 128316041 | + |
| 12341 | 1448596_at   | Region | Slc6a8        | 102857 | X  | 68333805  | 68343157  | + |
| 12342 | 1429767_at   | Region | 2810013P06Rik | 67206  | 8  | 122423784 | 122425711 | + |
| 12343 | 1424547_at   | Region | Car10         | 72605  | 11 | 92919497  | 93422360  | + |
| 12344 | 1428274_s_at | Region | 1110065L07Rik | 68904  | 8  | 9345221   | 9357725   | + |
| 12345 | 1451504_at   | Region | Chchd3        | 66075  | 6  | 32872201  | 33140615  | - |
| 12346 | 1449465_at   | Region | Reln          | 19699  | 5  | 20336833  | 20797054  | - |
| 12347 | 1423214_at   | Region | Plxnc1        | 54712  | 10 | 94767461  | 94918749  | - |
| 12348 | 1420530_at   | Region | Neud4         | 29861  | 7  | 24715394  | 24728970  | + |
| 12349 | 1454682_at   | Region | A430005L14Rik | 97159  | 4  | 152449599 | 152454276 | + |
| 12350 | 1427114_at   | Region | Ttc19         | 72795  | 11 | 62007122  | 62040890  | + |
| 12351 | 1429288_x_at | Region | Stx18         | 71116  | 5  | 36545458  | 36643042  | + |
| 12352 | 1450728_at   | Region | Fjx1          | 14221  | 2  | 102154049 | 102156475 | - |
| 12353 | 1426976_at   | Region | Usp47         | 74996  | 7  | 105876643 | 105964517 | + |
| 12354 | 1428562_at   | Region | 2210403K04Rik | 67098  | 11 | 75187288  | 75192350  | + |
| 12355 | 1455352_at   | Region | AU023006      | 102683 | 9  | 95365380  | 95368889  | - |
| 12356 | 1439946_at   | Region | Mef2c         | 17260  | 13 | 79604158  | 79763912  | + |
| 12357 | 1416049_at   | Region | Gldc          | 104174 | 19 | 29351052  | 29427324  | - |
| 12358 | 1417013_at   | Region | Hspb8         | 80888  | 5  | 115530010 | 115544379 | - |
| 12359 | 1421017_at   | Region | Nrg3          | 18183  | 14 | 36505478  | 36542277  | - |
| 12360 | 1456520_at   | Region | 9530033F24Rik | 268469 | 11 | 95584927  | 95586264  | + |
| 12361 | 1436321_at   | Region | B3gnt7        | 227327 | 1  | 86109779  | 86113616  | + |
| 12362 | 1417113_at   | Region | Gcl           | 23885  | 6  | 87126075  | 87167665  | - |
| 12363 | 1415797_at   | Region | Ddr1          | 12305  | 17 | 33397888  | 33421229  | - |
| 12364 | 1434824_at   | Region | Baz1b         | 22385  | 5  | 134200851 | 134258059 | + |
| 12365 | 1456380_x_at | Region | Cnn3          | 71994  | 3  | 120205773 | 120237098 | + |
| 12366 | 1423049_a_at | Region | Tpm1          | 22003  | 9  | 67151552  | 67178023  | - |
| 12367 | 1421124_at   | Region | Cdk5r1        | 12569  | 11 | 80202705  | 80206840  | + |
| 12368 | 1436349_at   | Region | 2700094K13Rik | 72657  | 2  | 84366970  | 84368431  | - |

|       |              |        |                   |        |      |           |           |      |
|-------|--------------|--------|-------------------|--------|------|-----------|-----------|------|
| 12369 | 1436902_x_at | Region | Tmsb10            | 19240  | 6    | 20039912  | 20040386  | +    |
| 12370 | 1418444_a_at | Region | MGI:1891827       | 56209  | 7    | 112564415 | 112581595 | -    |
| 12371 | 1447771_at   | Region | None              | None   | NONE | NONE      | NONE      | NONE |
| 12372 | 1435720_at   | Region | None              | None   | 3    | 105468784 | 105469832 | +    |
| 12373 | 1437975_a_at | Region | Rpl23a            | 268449 | 11   | 77906594  | 77909202  | -    |
| 12374 | 1421890_at   | Region | St3gal2           | 20444  | 8    | 110217644 | 110269279 | +    |
| 12375 | 1448218_s_at | Region | Ywhaz             | 22631  | 15   | 36773662  | 36797651  | -    |
| 12376 | 1423083_at   | Region | Rab33b            | 19338  | 3    | 51115980  | 51128158  | +    |
| 12377 | 1426554_a_at | Region | Pgam1             | 18648  | 19   | 41456332  | 41463037  | +    |
| 12378 | 1419628_at   | Region | Chx10             | 12677  | 12   | 81438199  | 81463804  | +    |
| 12379 | 1441145_at   | Region | D030065N23Rik     | 399586 | 2    | 92037458  | 92038145  | +    |
| 12380 | 1442359_at   | Region | AW045895          | 100891 | 5    | 5674532   | 5675294   | -    |
| 12381 | 1434749_at   | Region | BC067068          | 216292 | 10   | 105655737 | 105733844 | -    |
| 12382 | 1428505_at   | Region | 2310015N07Rik     | 66365  | 7    | 2391      | 6258      | -    |
| 12383 | 1448442_a_at | Region | Psma3             | 19167  | 12   | 67809701  | 67829929  | +    |
| 12384 | 1442581_at   | Region | Ksr               | 16706  | 11   | 78740461  | 78872020  | -    |
| 12385 | 1423914_at   | Region | C630004H02Rik     | 217310 | 11   | 115168802 | 115188812 | -    |
| 12386 | 1434872_x_at | Region | None              | None   | 6    | 34904862  | 34905086  | -    |
| 12387 | 1426110_a_at | Region | Edg2              | 14745  | 4    | 58378433  | 58496968  | -    |
| 12388 | 1449138_at   | Region | Sf3b1             | 81898  | 1    | 55286605  | 55333156  | -    |
| 12389 | 1415977_at   | Region | MGI:1919030       | 71780  | 8    | 69750834  | 69753776  | +    |
| 12390 | 1424736_at   | Region | Eef2              | 13629  | 10   | 81312692  | 81318533  | +    |
| 12391 | 1428217_at   | Region | 1600012H06Rik     | 67912  | 17   | 12995900  | 12998652  | +    |
| 12392 | 1416217_a_at | Region | Rpl37a            | 19981  | 1    | 73012971  | 73015366  | +    |
|       |              |        | Hpcal1 ///        |        |      |           |           |      |
|       |              |        | 2410018L13Rik /// |        |      |           |           |      |
|       |              |        | LOC245297 ///     |        |      |           |           |      |
|       |              |        | LOC544836 ///     |        |      |           |           |      |
|       |              |        | LOC544845 ///     |        |      |           |           |      |
| 12393 | 1439113_at   | Region | LOC544850         | 245297 | 12   | 17297145  | 17297932  | +    |
| 12394 | 1416563_at   | Region | Ctps              | 51797  | 4    | 119562310 | 119592708 | -    |
| 12395 | 1435630_s_at | Region | Acat2             | 110460 | 17   | 11571688  | 11589509  | +    |
| 12396 | 1456381_x_at | Region | Mcl1              | 17210  | 3    | 95146619  | 95151011  | +    |
| 12397 | 1454650_at   | Region | Trim35            | 66854  | 14   | 60824516  | 60836924  | +    |
| 12398 | 1418817_at   | Region | Chmp1b            | 67064  | 18   | 67434757  | 67436335  | +    |
| 12399 | 1456216_at   | Region | Csnk1a1           | 93687  | 18   | 61784394  | 61817111  | +    |
| 12400 | 1418119_at   | Region | Rbm8a             | 60365  | 3    | 96117769  | 96120746  | +    |
| 12401 | 1424285_s_at | Region | Arl6ip4           | 65105  | 5    | 123287433 | 123289520 | +    |
| 12402 | 1431771_a_at | Region | Irak1bp1          | 65099  | 9    | 83159766  | 83177453  | +    |
| 12403 | 1428536_at   | Region | Kcng4             | 66733  | 8    | 118977994 | 118989820 | -    |
| 12404 | 1445827_at   | Region | Prkcbp1           | 228880 | 2    | 165242034 | 165353683 | -    |
| 12405 | 1447891_at   | Region | None              | None   | 7    | 124871214 | 124871393 | +    |
| 12406 | 1451312_at   | Region | Ndufs7            | 75406  | 10   | 80374361  | 80381701  | +    |
| 12407 | 1422643_at   | Region | Moxd1             | 59012  | 10   | 24198081  | 24277347  | +    |
| 12408 | 1443353_at   | Region | None              | None   | 15   | 11942165  | 11942660  | +    |
| 12409 | 1450033_a_at | Region | Stat1             | 20846  | 1    | 52420399  | 52461905  | +    |
| 12410 | 1437172_x_at | Region | Hadhb             | 231086 | 5    | 28621184  | 28642098  | +    |
| 12411 | 1455428_at   | Region | A930008G19Rik     | 77938  | 7    | 127078161 | 127179580 | -    |
| 12412 | 1456201_at   | Region | 4632427E13Rik     | 68186  | 7    | 86777643  | 86778378  | -    |
| 12413 | 1434281_at   | Region | 1500034J01Rik     | 66498  | 8    | 70619056  | 70625966  | +    |
| 12414 | 1424562_a_at | Region | Slc25a4           | 11739  | 8    | 45151043  | 45155041  | -    |
| 12415 | 1447583_x_at | Region | Gpr30             | 76854  | 5    | 138420671 | 138425280 | +    |
| 12416 | 1435612_at   | Region | Opcml             | 330908 | 9    | 28570800  | 28821443  | +    |
| 12417 | 1436971_x_at | Region | Ywhaz             | 22631  | 15   | 36773662  | 36797651  | -    |
| 12418 | 1434087_at   | Region | Mthfr             | 17769  | 4    | 146533584 | 146551911 | +    |
| 12419 | 1441414_at   | Region | 2310047I15Rik     | 78887  | 11   | 3026676   | 3091300   | -    |
| 12420 | 1434193_at   | Region | Zfp258            | 100177 | 4    | 126104496 | 126151407 | +    |
| 12421 | 1439368_a_at | Region | Slc9a3r2          | 65962  | 17   | 22442873  | 22453949  | -    |
| 12422 | 1426234_s_at | Region | BC002199          | 211556 | 3    | 126691354 | 126692954 | -    |
| 12423 | 1415738_at   | Region | Txndc12           | 66073  | 4    | 107793583 | 107821025 | +    |
| 12424 | 1435454_a_at | Region | BC006779          | 229003 | 2    | 180944576 | 180954007 | -    |
| 12425 | 1439527_at   | Region | BB114106          | 102824 | 9    | 8978959   | 8979854   | +    |
| 12426 | 1425756_at   | Region | Rab40b            | 217371 | 11   | 121177896 | 121209232 | -    |
| 12427 | 1449938_at   | Region | Pp11r             | 19011  | 15   | 97786664  | 97796795  | -    |
| 12428 | 1434429_at   | Region | Syt16             | 238266 | 12   | 70980664  | 71124581  | +    |

|       |              |        |                   |        |      |           |           |      |
|-------|--------------|--------|-------------------|--------|------|-----------|-----------|------|
| 12429 | 1421924_at   | Region | Slc2a3            | 20527  | 6    | 123394798 | 123409491 | -    |
| 12430 | 1426238_at   | Region | Bmp1              | 12153  | 14   | 64790547  | 64836177  | -    |
| 12431 | 1428325_at   | Region | 2610019P18Rik     | 66455  | 5    | 137160349 | 137166708 | +    |
| 12432 | 1418716_at   | Region | Mrps25            | 64658  | 6    | 92621555  | 92631448  | -    |
| 12433 | 1434190_at   | Region | Sms               | 20603  | X    | 151043359 | 151091439 | -    |
| 12434 | 1442037_at   | Region | LOC434238         | 434238 | 7    | 116939048 | 116944447 | +    |
| 12435 | 1447806_s_at | Region | Stk23             | 56504  | X    | 68435077  | 68439580  | +    |
| 12436 | 1426773_at   | Region | Mfn1              | 67414  | 3    | 31937664  | 31985854  | +    |
| 12437 | 1449271_a_at | Region | Hebp2             | 56016  | 10   | 18464596  | 18470549  | -    |
| 12438 | 1438473_at   | Region | Arfrp2            | 218639 | 13   | 110208602 | 110571472 | +    |
| 12439 | 1425886_at   | Region | Fev               | 260298 | 1    | 75185718  | 75189628  | -    |
| 12440 | 1418464_at   | Region | Matn4             | 17183  | 2    | 163846367 | 163861893 | -    |
| 12441 | 1451062_a_at | Region | Pex2              | 58869  | 3    | 32358790  | 32491207  | -    |
|       |              |        | Rpl29 ///         |        |      |           |           |      |
|       |              |        | LOC433350 ///     |        |      |           |           |      |
|       |              |        | LOC433383 ///     |        |      |           |           |      |
| 12442 | 1455348_x_at | Region | LOC433941         | 19944  | 9    | 106423093 | 106425121 | +    |
| 12443 | 1429897_a_at | Region | D16Ertd472e       | 67102  | 16   | 77629000  | 77662117  | -    |
| 12444 | 1417652_a_at | Region | Tbca              | 21371  | 13   | 90973009  | 91026965  | +    |
| 12445 | 1442079_at   | Region | Tmem23            | 208449 | 19   | 31448202  | 31573509  | -    |
| 12446 | 1437174_at   | Region | Tfdp2             | 211586 | 9    | 96095461  | 96217969  | +    |
| 12447 | 1432750_at   | Region | 2810409C01Rik     | 69243  | X    | 107033291 | 107034548 | +    |
| 12448 | 1435484_at   | Region | BF642829          | 503859 | 16   | 91243262  | 91244718  | +    |
| 12449 | 1428821_at   | Region | Agpat2            | 67512  | 2    | 26525749  | 26536372  | -    |
| 12450 | 1427202_at   | Region | 4833442J19Rik     | 320204 | 6    | 150077480 | 150087054 | +    |
| 12451 | 1428587_at   | Region | Tmem41b           | 233724 | 7    | 103825350 | 103839101 | -    |
| 12452 | 1436035_at   | Region | 3830431G21Rik     | 217682 | 12   | 77553846  | 77585467  | +    |
| 12453 | 1448640_at   | Region | Slc14a1           | 108052 | 18   | 78222739  | 78245970  | -    |
| 12454 | 1417839_at   | Region | Cldn5             | 12741  | 16   | 17547897  | 17549310  | +    |
| 12455 | 1445767_at   | Region | Ptprd             | 19266  | NONE | NONE      | NONE      | NONE |
| 12456 | 1422541_at   | Region | Ptprm             | 19274  | 17   | 64435036  | 65122417  | -    |
| 12457 | 1428289_at   | Region | Klf9              | 16601  | 19   | 22379147  | 22404832  | +    |
| 12458 | 1460607_at   | Region | Igsf11            | 207683 | 16   | 37725194  | 37850220  | +    |
| 12459 | 1424720_at   | Region | Mgat4b            | 103534 | 11   | 49978474  | 49987491  | +    |
| 12460 | 1435763_at   | Region | Tbc1d16           | 207592 | 11   | 118968230 | 119049592 | -    |
| 12461 | 1458592_at   | Region | None              | None   | 5    | 130812544 | 130812991 | -    |
| 12462 | 1422538_at   | Region | Extl2             | 58193  | 3    | 114777993 | 114799388 | +    |
| 12463 | 1421181_at   | Region | Nptxr             | 73340  | 15   | 79841252  | 79857012  | -    |
| 12464 | 1434443_at   | Region | None              | None   | 2    | 128124162 | 128125728 | -    |
| 12465 | 1421491_a_at | Region | Tmem49            | 75909  | 11   | 86311857  | 86411814  | -    |
| 12466 | 1418053_at   | Region | Sncb              | 104069 | 13   | 53366552  | 53374115  | -    |
| 12467 | 1422500_at   | Region | Idh3a             | 67834  | 9    | 54704020  | 54722171  | +    |
| 12468 | 1416684_at   | Region | Fbl /// LOC545184 | 14113  | 7    | 23565500  | 23575021  | +    |
| 12469 | 1416175_a_at | Region | Vdac3             | 22335  | 8    | 21331680  | 21348337  | -    |
| 12470 | 1439619_at   | Region | Tcf12             | 21406  | 9    | 71980605  | 72246476  | -    |
| 12471 | 1429649_at   | Region | Slc35a3           | 229782 | 3    | 115439734 | 115481216 | -    |
| 12472 | 1451264_at   | Region | 4930488L10Rik     | 319710 | 12   | 67659295  | 67737242  | +    |
| 12473 | 1455170_at   | Region | 2810001G20Rik     | 66456  | 11   | 63805232  | 63808909  | +    |
| 12474 | 1435297_at   | Region | Gja9              | 14617  | 2    | 113523441 | 113527459 | -    |
| 12475 | 1442502_at   | Region | Lrch1             | 380916 | 14   | 69108806  | 69291857  | -    |
| 12476 | 1445873_at   | Region | Tfdp2             | 211586 | 9    | 96095461  | 96217969  | +    |
| 12477 | 1437742_at   | Region | Rab21             | 216344 | 10   | 114975874 | 115001563 | -    |
| 12478 | 1450937_at   | Region | Lin7c             | 22343  | 2    | 109514665 | 109524724 | +    |
| 12479 | 1442101_at   | Region | A930017N06Rik     | 243312 | 5    | 138904283 | 138971062 | +    |
| 12480 | 1436177_at   | Region | Plekha2           | 83436  | 8    | 23764086  | 23824498  | -    |
| 12481 | 1415945_at   | Region | Mcm5              | 17218  | 8    | 74273686  | 74291750  | +    |
| 12482 | 1441023_at   | Region | Eif2s2            | 67204  | 2    | 154328353 | 154349719 | -    |
| 12483 | 1451743_at   | Region | D19Wsu162e        | 226178 | 19   | 46146382  | 46202440  | +    |
| 12484 | 1438404_at   | Region | Rnf144            | 108089 | 12   | 22852685  | 22961373  | -    |
| 12485 | 1455468_at   | Region | 9330164H19Rik     | 233115 | 7    | 30851673  | 30917234  | -    |
| 12486 | 1456570_at   | Region | 6430704M03Rik     | 230235 | 4    | 56903585  | 56933806  | -    |
| 12487 | 1451169_at   | Region | Nomo1             | 211548 | 7    | 40119166  | 40169552  | +    |
| 12488 | 1455727_at   | Region | U2af1-rs2         | 22184  | X    | 157534848 | 157558003 | -    |
| 12489 | 1435870_at   | Region | Sycp3             | 20962  | 10   | 88431421  | 88445069  | +    |
| 12490 | 1422569_at   | Region | Yy1               | 22632  | 12   | 104264095 | 104287625 | +    |

|       |              |        |                   |        |    |           |           |   |
|-------|--------------|--------|-------------------|--------|----|-----------|-----------|---|
| 12491 | 1459971_at   | Region | None              | None   | 1  | 140488179 | 140488433 | + |
| 12492 | 1437437_x_at | Region | Dnpep             | 13437  | 1  | 75598827  | 75608568  | - |
| 12493 | 1460260_s_at | Region | Kpna1             | 16646  | 16 | 34764772  | 34817569  | + |
| 12494 | 1455101_at   | Region | None              | None   | 10 | 13089390  | 13089847  | - |
| 12495 | 1420508_at   | Region | Sema3f            | 20350  | 9  | 107747279 | 107776252 | - |
| 12496 | 1427012_at   | Region | Lancl1            | 14768  | 1  | 67292813  | 67331161  | - |
| 12497 | 1420731_a_at | Region | Csrp2             | 13008  | 10 | 110543027 | 110562470 | + |
| 12498 | 1435456_at   | Region | AI428795          | 209683 | 5  | 110273612 | 110336823 | + |
| 12499 | 1426187_a_at | Region | Hax1              | 23897  | 3  | 89805798  | 89809027  | - |
| 12500 | 1438455_at   | Region | C330050A14Rik     | 78704  | 3  | 46037530  | 46038398  | - |
| 12501 | 1440866_at   | Region | Prkr              | 19106  | 17 | 76674799  | 76704807  | - |
| 12502 | 1452309_at   | Region | Cgnl1             | 68178  | 9  | 71761361  | 71906454  | - |
| 12503 | 1439009_at   | Region | Gnl3l             | 237107 | X  | 144517536 | 144551643 | - |
| 12504 | 1456114_at   | Region | Cds1              | 74596  | 5  | 100785901 | 100844694 | + |
| 12505 | 1428561_at   | Region | 2610002J23Rik     | 69886  | 11 | 100278210 | 100279249 | - |
| 12506 | 1445600_at   | Region | A330103N21Rik     | 77773  | 7  | 61919158  | 61919541  | + |
| 12507 | 1460506_s_at | Region | Ndufc2            | 68197  | 7  | 91446361  | 91454068  | + |
| 12508 | 1456193_x_at | Region | None              | None   | 10 | 46037249  | 46037583  | + |
| 12509 | 1450522_a_at | Region | H1f0              | 14958  | 15 | 79079749  | 79081790  | + |
| 12510 | 1450561_a_at | Region | Surf1             | 20930  | 2  | 26845598  | 26848493  | - |
| 12511 | 1457966_at   | Region | None              | None   | 15 | 26643761  | 26644191  | - |
| 12512 | 1426657_s_at | Region | Phgdh             | 236539 | 3  | 97799380  | 97826178  | - |
| 12513 | 1458089_at   | Region | Fkbp5             | 14229  | 17 | 26200322  | 26287578  | - |
| 12514 | 1450567_a_at | Region | Col2a1            | 12824  | 15 | 98051602  | 98080055  | - |
| 12515 | 1426289_at   | Region | 2610028H07Rik     | 69232  | 9  | 108566005 | 108594371 | + |
| 12516 | 1442243_at   | Region | Per3              | 18628  | 4  | 149497074 | 149536951 | - |
| 12517 | 1440361_at   | Region | None              | None   | 4  | 37091817  | 37126884  | + |
| 12518 | 1437856_at   | Region | lpmk              | 69718  | 10 | 71401760  | 71439983  | + |
| 12519 | 1448870_at   | Region | Ltbp1             | 268977 | 17 | 72812765  | 73202010  | + |
| 12520 | 1418767_at   | Region | Cyp4f13           | 170716 | 17 | 30748639  | 30771938  | - |
| 12521 | 1456316_a_at | Region | Acbd3             | 170760 | 1  | 180679954 | 180707985 | + |
| 12522 | 1455115_a_at | Region | Crb3              | 224912 | 17 | 54752222  | 54755863  | + |
| 12523 | 1415775_at   | Region | Rbbp7             | 245688 | X  | 156359864 | 156378495 | + |
| 12524 | 1434648_a_at | Region | Ccm2              | 216527 | 11 | 6441744   | 6491532   | + |
| 12525 | 1451231_a_at | Region | Cul2              | 71745  | 18 | 3387735   | 3440960   | + |
| 12526 | 1449263_at   | Region | Ufm1              | 67890  | 3  | 53489432  | 53497992  | - |
| 12527 | 1452738_at   | Region | Stoml1            | 69106  | 9  | 58367732  | 58377239  | + |
| 12528 | 1451917_a_at | Region | Dcamk1            | 13175  | 3  | 54876964  | 55171014  | + |
| 12529 | 1448694_at   | Region | Jun               | 16476  | 4  | 94024127  | 94027259  | - |
| 12530 | 1415747_s_at | Region | Riok3             | 66878  | 18 | 12316360  | 12344298  | + |
| 12531 | 1433910_at   | Region | Zcchc6            | 214290 | 13 | 58431477  | 58482699  | - |
| 12532 | 1437214_at   | Region | Lrrtm4            | 243499 | 6  | 80352899  | 80359760  | + |
| 12533 | 1417804_at   | Region | LOC381240         | 381240 | 19 | 6189191   | 6203905   | + |
|       |              |        | Akr1b3 ///        |        |    |           |           |   |
| 12534 | 1456590_x_at | Region | LOC432549         | 11677  | 6  | 34398202  | 34411739  | - |
| 12535 | 1439825_at   | Region | Dtx3l             | 209200 | 16 | 34709546  | 34710081  | - |
| 12536 | 1456573_x_at | Region | Nnt               | 18115  | 13 | 10658     | 16286     | - |
|       |              |        | 4933424M23Rik /// |        |    |           |           |   |
| 12537 | 1455229_x_at | Region | LOC260345         | 260345 | 11 | 117826678 | 117845105 | + |
| 12538 | 1435595_at   | Region | 1810011O10Rik     | 69068  | 8  | 23192443  | 23193773  | - |
| 12539 | 1438627_x_at | Region | Pgd               | 110208 | 4  | 147642356 | 147659030 | - |
| 12540 | 1457374_at   | Region | Nedd4l            | 83814  | 18 | 65256461  | 65446324  | + |
| 12541 | 1455655_a_at | Region | Tardbp            | 230908 | 4  | 147104744 | 147119358 | - |
| 12542 | 1438199_at   | Region | AI316807          | 102032 | 8  | 21214785  | 21228840  | - |
| 12543 | 1443957_at   | Region | Dixdc1            | 330938 | 9  | 50735078  | 50800301  | - |
| 12544 | 1455455_at   | Region | 4732486J07Rik     | 320302 | 3  | 85613266  | 85630813  | - |
| 12545 | 1416559_at   | Region | 1500003O22Rik     | 101867 | 7  | 99846861  | 99851152  | - |
| 12546 | 1442419_at   | Region | None              | None   | 18 | 40760490  | 40761167  | + |
| 12547 | 1438009_at   | Region | Hist1h2ad         | 319165 | 13 | 23054539  | 23054931  | + |
| 12548 | 1442077_at   | Region | 2310076G05Rik     | 76963  | 9  | 81953359  | 81954073  | - |
| 12549 | 1421860_at   | Region | Clstn1            | 65945  | 4  | 148079000 | 148140261 | + |
| 12550 | 1434547_at   | Region | Cpd               | 12874  | 11 | 76507648  | 76572655  | - |
| 12551 | 1433611_s_at | Region | None              | None   | 5  | 144178885 | 144186515 | + |
| 12552 | 1454015_a_at | Region | Cdh13             | 12554  | 8  | 118009574 | 118667271 | + |
| 12553 | 1427620_at   | Region | Parc              | 78309  | 17 | 44009963  | 44037654  | - |

|       |              |        |                 |        |    |           |           |   |
|-------|--------------|--------|-----------------|--------|----|-----------|-----------|---|
| 12554 | 1449302_at   | Region | Abca2           | 11305  | 2  | 25360932  | 25380361  | + |
| 12555 | 1423507_a_at | Region | Sirt2           | 64383  | 7  | 24172893  | 24194867  | + |
| 12556 | 1451425_a_at | Region | Mkrm1           | 54484  | 6  | 39533206  | 39555816  | - |
| 12557 | 1456909_at   | Region | Gpi1 /// Gm1840 | 14751  | 7  | 29355949  | 29384053  | - |
| 12558 | 1428675_at   | Region | 1110049F12Rik   | 66193  | 4  | 134856862 | 134868502 | - |
| 12559 | 1418086_at   | Region | Ppp1r14a        | 68458  | 7  | 24700565  | 24704617  | + |
| 12560 | 1449281_at   | Region | Nrtn            | 18188  | 17 | 54441310  | 54447662  | - |
| 12561 | 1456176_x_at | Region | D11Ertd333e     | 68066  | 11 | 102224234 | 102228559 | - |
| 12562 | 1438022_at   | Region | Rab11fip3       | 215445 | 17 | 23782207  | 23862685  | - |
| 12563 | 1451097_at   | Region | Vasp            | 22323  | 7  | 16126947  | 16134057  | - |
| 12564 | 1417573_at   | Region | 2010311D03Rik   | 109129 | 2  | 50212043  | 50228839  | - |
| 12565 | 1460671_at   | Region | Gpx1            | 14775  | 9  | 108408939 | 108410079 | + |
| 12566 | 1432705_at   | Region | 5330428N10Rik   | 78277  | 10 | 108524259 | 108525835 | - |
| 12567 | 1421415_s_at | Region | Gcnt2           | 14538  | 13 | 40420765  | 40521482  | + |
| 12568 | 1437021_at   | Region | Arl2l1          | 68146  | 16 | 61787624  | 61834525  | - |
| 12569 | 1438931_s_at | Region | Sesn1           | 140742 | 10 | 42013946  | 42014164  | + |
| 12570 | 1434377_x_at | Region | Rps6            | 20104  | 4  | 85840854  | 85843549  | - |
| 12571 | 1423484_at   | Region | Bicc1           | 83675  | 10 | 70979053  | 71213601  | - |
| 12572 | 1423550_at   | Region | Slc1a4          | 55963  | 11 | 20196998  | 20227464  | - |
| 12573 | 1428388_at   | Region | Tnks2           | 74493  | 19 | 36161291  | 36235550  | + |
| 12574 | 1453283_at   | Region | Pgm1            | 66681  | 5  | 62890880  | 62926108  | + |
| 12575 | 1448265_x_at | Region | Eva1            | 14012  | 9  | 45031412  | 45042867  | + |
| 12576 | 1424659_at   | Region | Slit2           | 20563  | 5  | 46748038  | 47069334  | + |
| 12577 | 1455378_at   | Region | BC057371        | 194237 | 4  | 118424188 | 118451484 | - |
| 12578 | 1438973_x_at | Region | Gja1            | 14609  | 10 | 56627159  | 56640230  | + |
| 12579 | 1451135_at   | Region | Gtf2b           | 229906 | 3  | 141734221 | 141752580 | + |
| 12580 | 1446244_at   | Region | D6Bwg1452e      | 242610 | 6  | 107189346 | 107259993 | - |
| 12581 | 1459214_at   | Region | Odz2            | 23964  | 11 | 35801678  | 36738275  | - |
| 12582 | 1417685_at   | Region | Ankfy1          | 11736  | 11 | 72437815  | 72496879  | + |
| 12583 | 1424528_at   | Region | Cgref1          | 68567  | 5  | 29392087  | 29404535  | - |
| 12584 | 1456752_at   | Region | None            | None   | 2  | 173691335 | 173691965 | - |
| 12585 | 1435162_at   | Region | Prkg2           | 19092  | 5  | 97950831  | 98055222  | - |
| 12586 | 1437597_at   | Region | None            | None   | 7  | 55299710  | 55667682  | - |
| 12587 | 1458830_at   | Region | 4931432E15Rik   | 70991  | 14 | 10630860  | 10631610  | + |
| 12588 | 1437331_a_at | Region | Arf3            | 11842  | 15 | 98795066  | 98820699  | - |
| 12589 | 1432757_at   | Region | 2900011L18Rik   | 77082  | 13 | 104041848 | 104042951 | - |
| 12590 | 1421075_s_at | Region | Cyp7b1          | 13123  | 3  | 17402749  | 17573964  | - |
| 12591 | 1456243_x_at | Region | Mcl1            | 17210  | 3  | 95146619  | 95151011  | + |
| 12592 | 1456862_at   | Region | Six4            | 20474  | 12 | 69946438  | 69959424  | - |
| 12593 | 1433712_at   | Region | AW555464        | 217882 | 12 | 108218013 | 108225980 | + |
| 12594 | 1424776_a_at | Region | Slc25a28        | 246696 | 19 | 43208207  | 43219287  | - |
| 12595 | 1450963_at   | Region | Hnrpf           | 98758  | 6  | 118349909 | 118358058 | + |
| 12596 | 1434249_s_at | Region | None            | None   | 12 | 67076694  | 67077367  | - |
| 12597 | 1417783_at   | Region | Als2            | 74018  | 1  | 59468051  | 59542338  | - |
| 12598 | 1416867_at   | Region | Bet1            | 12068  | 6  | 4029552   | 4039575   | - |
| 12599 | 1453181_x_at | Region | Plscr1          | 22038  | 9  | 92150623  | 92163255  | + |
| 12600 | 1417928_at   | Region | Pdlim4          | 30794  | 11 | 53807773  | 53821809  | - |
| 12601 | 1431766_x_at | Region | Rps2            | 16898  | 17 | 22525236  | 22527051  | + |
| 12602 | 1450422_a_at | Region | Kdelc1          | 72050  | 1  | 44402365  | 44414592  | - |
| 12603 | 1428749_at   | Region | Dmxl2           | 235380 | 9  | 54479317  | 54533979  | - |
| 12604 | 1426372_a_at | Region | Bet1l           | 54399  | 7  | 135255293 | 135258149 | - |
| 12605 | 1420908_at   | Region | Cd2ap           | 12488  | 17 | 40292779  | 40376218  | - |
| 12606 | 1421567_at   | Region | Npas3           | 27386  | 12 | 50702581  | 50824492  | + |
| 12607 | 1449228_at   | Region | Sh3gl2          | 20404  | 4  | 84191648  | 84375572  | + |
| 12608 | 1415749_a_at | Region | Rragc           | 54170  | 4  | 122944623 | 122964102 | + |
| 12609 | 1417166_at   | Region | Psip1           | 101739 | 4  | 82441872  | 82472582  | - |
| 12610 | 1439654_at   | Region | LOC319225       | 319225 | 9  | 100448950 | 100449985 | + |
| 12611 | 1433928_a_at | Region | Rpl13a          | 22121  | 7  | 39202318  | 39205277  | - |
| 12612 | 1435206_at   | Region | Slc24a4         | 238384 | 12 | 97574903  | 97712233  | + |
| 12613 | 1439802_at   | Region | Stk35           | 67333  | 2  | 129314605 | 129341840 | + |
| 12614 | 1455994_x_at | Region | Elov1l          | 54325  | 4  | 117387050 | 117391522 | + |
| 12615 | 1431316_at   | Region | Itch            | 16396  | 2  | 154590446 | 154683791 | + |
| 12616 | 1426406_at   | Region | 2410195B05Rik   | 67956  | 5  | 123611273 | 123633650 | + |
| 12617 | 1437100_x_at | Region | Pim3            | 223775 | 15 | 88914123  | 88917655  | + |
| 12618 | 1423318_at   | Region | Rad18           | 58186  | 6  | 113184164 | 113259954 | - |



|       |              |        |                   |        |      |           |           |      |
|-------|--------------|--------|-------------------|--------|------|-----------|-----------|------|
| 12619 | 1423822_a_at | Region | 8430437G11Rik     | 101118 | 6    | 13567638  | 13595014  | -    |
| 12620 | 1424071_s_at | Region | BC018507          | 218333 | 13   | 66640392  | 66677128  | -    |
| 12621 | 1434232_a_at | Region | None              | None   | X    | 66483448  | 66485362  | +    |
| 12622 | 1423871_at   | Region | BC014795          | 208795 | 1    | 180896338 | 180928924 | +    |
| 12623 | 1455778_at   | Region | Zfp192            | 93681  | 13   | 20999835  | 21011161  | -    |
| 12624 | 1435675_at   | Region | Tbc1d12           | 209478 | 19   | 38180383  | 38263474  | +    |
| 12625 | 1437094_x_at | Region | Dnaic1            | 68922  | 4    | 41708645  | 41777001  | +    |
| 12626 | 1424276_at   | Region | Snx16             | 74718  | 3    | 10419694  | 10441634  | -    |
| 12627 | 1450729_at   | Region | Hs2st1            | 23908  | 3    | 143402785 | 143541813 | -    |
| 12628 | 1456227_x_at | Region | Rbbp7             | 245688 | X    | 156359864 | 156378495 | +    |
| 12629 | 1417574_at   | Region | Cxcl12            | 20315  | 6    | 117603898 | 117616686 | +    |
| 12630 | 1452416_at   | Region | Il6ra             | 16194  | 3    | 89634609  | 89719225  | -    |
| 12631 | 1456180_at   | Region | LOC380843         | 380843 | 13   | 46016804  | 46028743  | +    |
| 12632 | 1451270_at   | Region | Dusp18            | 75219  | 11   | 3790068   | 3796083   | +    |
| 12633 | 1424013_at   | Region | Etf1              | 225363 | 18   | 35127577  | 35155611  | -    |
| 12634 | 1418198_a_at | Region | Tm9sf1            | 74140  | 14   | 50153981  | 50161821  | -    |
| 12635 | 1460081_at   | Region | Syt7              | 54525  | 19   | 9585980   | 9644941   | +    |
| 12636 | 1424250_a_at | Region | Arhgef3           | 71704  | 14   | 25376244  | 25542109  | +    |
| 12637 | 1417045_at   | Region | Bid               | 12122  | 6    | 121323904 | 121348810 | -    |
| 12638 | 1415830_at   | Region | Orc5l             | 26429  | 5    | 20939068  | 21004775  | -    |
| 12639 | 1441462_at   | Region | Dock4             | 238130 | 12   | 37409375  | 37410068  | +    |
| 12640 | 1418996_a_at | Region | 4930469P12Rik     | 67636  | 6    | 146057599 | 146063382 | +    |
| 12641 | 1418651_at   | Region | Spata6            | 67946  | 4    | 110678911 | 110787339 | +    |
| 12642 | 1425700_at   | Region | Grm1              | 14816  | 10   | 10563608  | 10961343  | -    |
| 12643 | 1456763_at   | Region | AA536749          | 26936  | 11   | 59388161  | 59501851  | +    |
| 12644 | 1436084_at   | Region | Scrt1             | 170729 | 15   | 76566591  | 76572559  | -    |
| 12645 | 1423692_at   | Region | Ndufa8            | 68375  | 2    | 35968496  | 35981454  | -    |
| 12646 | 1427125_s_at | Region | Lrrc41            | 230654 | 4    | 115034370 | 115055948 | +    |
| 12647 | 1416285_at   | Region | Ndufc1            | 66377  | 3    | 51037443  | 51040919  | -    |
| 12648 | 1429501_s_at | Region | Ppm1a             | 19042  | 12   | 69630561  | 69641441  | +    |
| 12649 | 1455465_at   | Region | None              | None   | NONE | NONE      | NONE      | NONE |
| 12650 | 1448900_at   | Region | D16H22S680E       | 27883  | 16   | 17071867  | 17095487  | -    |
| 12651 | 1419545_a_at | Region | Atp6v1c1          | 66335  | 15   | 38667202  | 38697131  | +    |
| 12652 | 1434178_at   | Region | Mll3              | 231051 | 5    | 23741347  | 23769624  | -    |
| 12653 | 1427050_at   | Region | 5730420B22Rik     | 70561  | 14   | 2827      | 4349      | +    |
| 12654 | 1448559_at   | Region | Flot1             | 14251  | 17   | 33540621  | 33550054  | +    |
| 12655 | 1433864_at   | Region | Lrp12             | 239393 | 15   | 39764001  | 39836637  | -    |
| 12656 | 1425853_s_at | Region | Prlr              | 19116  | 15   | 9991399   | 10143512  | +    |
| 12657 | 1448937_at   | Region | Slc35b3           | 108652 | 13   | 38472884  | 38501276  | -    |
| 12658 | 1433565_at   | Region | Prpf38a           | 230596 | 4    | 107523775 | 107538232 | -    |
| 12659 | 1452277_at   | Region | 6330406P08Rik     | 74008  | 11   | 109310969 | 109394419 | +    |
| 12660 | 1423749_s_at | Region | Rangap1           | 19387  | 15   | 81754967  | 81780618  | -    |
| 12661 | 1437123_at   | Region | Mmrn2             | 105450 | 14   | 32512110  | 32539866  | +    |
| 12662 | 1447745_at   | Region | Aqp4              | 11829  | 18   | 15581082  | 15591914  | -    |
| 12663 | 1437195_x_at | Region | Mapk10            | 26414  | 5    | 101946583 | 102247027 | -    |
| 12664 | 1422795_at   | Region | Cul3              | 26554  | 1    | 80599109  | 80655022  | -    |
| 12665 | 1433490_s_at | Region | Epb4.1l2          | 13822  | 10   | 25420347  | 25491840  | +    |
| 12666 | 1423675_at   | Region | Usp1              | 230484 | 4    | 97898883  | 97910606  | +    |
| 12667 | 1433769_at   | Region | Als2cl            | 235633 | 9    | 110921471 | 110941821 | +    |
| 12668 | 1426358_at   | Region | Taok1             | 216965 | 11   | 77255718  | 77311108  | -    |
| 12669 | 1451990_at   | Region | Mapre2            | 212307 | 18   | 24032480  | 24122349  | +    |
| 12670 | 1454514_at   | Region | 5730415C11Rik     | 70522  | 2    | 174275547 | 174277376 | -    |
| 12671 | 1434944_at   | Region | Dmpk              | 13400  | 7    | 15952756  | 15961863  | +    |
| 12672 | 1452075_at   | Region | 4933435A13Rik     | 74467  | 11   | 23560487  | 23626315  | +    |
| 12673 | 1450965_at   | Region | Tex261            | 21766  | 6    | 84114647  | 84119990  | -    |
| 12674 | 1438157_s_at | Region | Nfkbia            | 18035  | 12   | 52210017  | 52212762  | -    |
|       |              |        | Tdg /// LOC434200 |        |      |           |           |      |
| 12675 | 1416790_a_at | Region | /// LOC545124     | 21665  | 10   | 82517850  | 82538768  | +    |
| 12676 | 1422645_at   | Region | Hfe               | 15216  | 13   | 23183718  | 23190688  | -    |
| 12677 | 1453010_at   | Region | 1700069O15Rik     | 73473  | 18   | 32307908  | 32337452  | +    |
| 12678 | 1434318_a_at | Region | Tcfe3             | 209446 | X    | 6001657   | 6014139   | +    |
| 12679 | 1460182_at   | Region | Snx4              | 69150  | 16   | 32059538  | 32107644  | +    |
| 12680 | 1434011_a_at | Region | 1110055N21Rik     | 109077 | 19   | 8089552   | 8094435   | +    |
| 12681 | 1424836_a_at | Region | Clasp2            | 76499  | 9    | 113865413 | 113971281 | +    |
| 12682 | 1416811_s_at | Region | Ctla2a /// Ctla2b | 13024  | 13   | 59552384  | 59592485  | -    |

|       |              |        |               |        |      |           |           |      |
|-------|--------------|--------|---------------|--------|------|-----------|-----------|------|
| 12683 | 1433805_at   | Region | Jak1          | 16451  | 4    | 100111937 | 100224138 | -    |
| 12684 | 1417014_at   | Region | Hspb8         | 80888  | 5    | 115530010 | 115544379 | -    |
| 12685 | 1418726_a_at | Region | Tnnt2         | 21956  | 1    | 135683299 | 135699154 | +    |
| 12686 | 1437491_at   | Region | Bicd2         | 76895  | 13   | 48941109  | 48984662  | +    |
| 12687 | 1422955_at   | Region | Syt17         | 110058 | 7    | 112257713 | 112319409 | -    |
| 12688 | 1426525_at   | Region | Arid2         | 77044  | 15   | 96436802  | 96469595  | +    |
| 12689 | 1439441_x_at | Region | Lats2         | 50523  | 14   | 52225857  | 52269062  | -    |
| 12690 | 1448276_at   | Region | Tspan4        | 64540  | 7    | 135877231 | 135896200 | +    |
| 12691 | 1422601_at   | Region | Serpib9       | 20723  | 13   | 32484235  | 32496502  | +    |
| 12692 | 1447923_at   | Region | 1810026B05Rik | 69170  | 7    | 67437423  | 67511772  | -    |
| 12693 | 1440005_at   | Region | C730009D12    | 328974 | 18   | 64627679  | 64628366  | +    |
| 12694 | 1423784_at   | Region | Gars          | 353172 | 6    | 55182345  | 55223825  | +    |
| 12695 | 1434271_at   | Region | Gba2          | 230101 | 4    | 43482859  | 43494471  | -    |
| 12696 | 1443739_at   | Region | Lrba          | 80877  | 3    | 85969078  | 86527074  | +    |
| 12697 | 1435892_at   | Region | C230079D11Rik | 211961 | 18   | 22565695  | 22746074  | +    |
| 12698 | 1452965_at   | Region | Ankrd13d      | 68423  | 19   | 4058970   | 4071838   | -    |
| 12699 | 1442994_at   | Region | None          | None   | 17   | 11856039  | 11856765  | +    |
| 12700 | 1417803_at   | Region | 1110032A04Rik | 66183  | 3    | 69493969  | 69534304  | -    |
| 12701 | 1435727_s_at | Region | D15Ertd366e   | 65970  | 15   | 99835724  | 99877288  | -    |
| 12702 | 1451835_at   | Region | Sox21         | 223227 | 14   | 112788599 | 112791264 | -    |
| 12703 | 1434432_at   | Region | 1700051E09Rik | 67338  | 11   | 82543481  | 82510403  | -    |
| 12704 | 1449588_at   | Region | Abca4         | 11304  | 3    | 120823356 | 120958398 | +    |
| 12705 | 1429189_at   | Region | 1110007C02Rik | 71784  | 13   | 90125585  | 90127079  | +    |
| 12706 | 1450459_at   | Region | 2010106G01Rik | 66552  | 2    | 126407985 | 126447088 | -    |
| 12707 | 1424059_at   | Region | Suv420h2      | 232811 | 7    | 3987805   | 3993512   | +    |
| 12708 | 1416327_at   | Region | Ufc1          | 66155  | 1    | 171217403 | 171223821 | -    |
| 12709 | 1436117_at   | Region | A830010M20Rik | 231570 | 5    | 106566410 | 106581669 | +    |
| 12710 | 1437253_at   | Region | A630054L15Rik | 211922 | 14   | 24675766  | 24724614  | +    |
| 12711 | 1448785_at   | Region | Cbfa2t1h      | 12395  | 4    | 13711747  | 13818082  | +    |
| 12712 | 1415972_at   | Region | Marcks        | 17118  | 10   | 37207003  | 37211096  | -    |
| 12713 | 1423812_s_at | Region | AW146242      | 232023 | 6    | 57914676  | 57987537  | -    |
| 12714 | 1417092_at   | Region | Pthr1         | 19228  | 9    | 110763551 | 110783597 | -    |
| 12715 | 1430769_s_at | Region | 2900009I07Rik | 68034  | 19   | 23715807  | 23717504  | -    |
| 12716 | 1433953_at   | Region | Zfp277        | 246196 | 12   | 36913519  | 37044268  | -    |
| 12717 | 1416928_at   | Region | Rbm12         | 75710  | 2    | 155551819 | 155568864 | -    |
| 12718 | 1449575_a_at | Region | Gstp1         | 14870  | 19   | 3824201   | 3826702   | -    |
| 12719 | 1438683_at   | Region | Wasf2         | 242687 | 4    | 132091532 | 132159229 | +    |
| 12720 | 1434954_at   | Region | None          | None   | 12   | 75695830  | 75697278  | +    |
| 12721 | 1442198_at   | Region | Nek7          | 59125  | 1    | 138334093 | 138469075 | -    |
| 12722 | 1431109_at   | Region | 5430406M13Rik | 71373  | 18   | 51332684  | 51520075  | +    |
| 12723 | 1436512_at   | Region | Arl7          | 320982 | 1    | 88517718  | 88521248  | -    |
| 12724 | 1440234_at   | Region | 1810012P15Rik | 66274  | 11   | 78552254  | 78563925  | +    |
| 12725 | 1452054_at   | Region | 6130401J04Rik | 66799  | 1    | 16725948  | 16804454  | -    |
| 12726 | 1421898_a_at | Region | Mr1           | 15064  | 1    | 155018615 | 155037520 | -    |
| 12727 | 1427955_a_at | Region | Deb1          | 26901  | 9    | 121724597 | 121727129 | +    |
| 12728 | 1425422_a_at | Region | Parn          | 74108  | 16   | 12274917  | 12404322  | -    |
| 12729 | 1450949_at   | Region | Katna1        | 23924  | 10   | 7591699   | 7628626   | +    |
| 12730 | 1420025_s_at | Region | LOC545863     | 545863 | 6    | 87429962  | 87436507  | +    |
| 12731 | 1418371_at   | Region | 6720463E02Rik | 68097  | 11   | 87707525  | 87715497  | -    |
| 12732 | 1437494_at   | Region | Mapkapk3      | 102626 | 9    | 107320708 | 107355658 | -    |
| 12733 | 1420129_s_at | Region | D10Wsu52e     | 28088  | 10   | 85899581  | 85918735  | -    |
| 12734 | 1424303_at   | Region | AV216087      | 211896 | 2    | 104426538 | 104447555 | -    |
| 12735 | 1421846_at   | Region | Wsb2          | 59043  | 5    | 116486085 | 116507368 | +    |
| 12736 | 1426939_at   | Region | 2310007F12Rik | 69499  | X    | 144621704 | 144630913 | -    |
| 12737 | 1455030_at   | Region | None          | None   | 2    | 89887873  | 89889787  | +    |
| 12738 | 1417533_a_at | Region | Itgb5         | 16419  | 16   | 32637841  | 32757227  | +    |
| 12739 | 1418972_at   | Region | Bcl10         | 12042  | 3    | 144898767 | 144908672 | +    |
| 12740 | 1444444_at   | Region | None          | None   | 12   | 49908727  | 49909065  | +    |
| 12741 | 1424393_s_at | Region | Adhfe1        | 76187  | 1    | 9652849   | 9682760   | +    |
| 12742 | 1439607_at   | Region | BC061928      | 241919 | 3    | 30617648  | 30721720  | -    |
| 12743 | 1434450_s_at | Region | Adrbk2        | 320129 | 5    | 111987619 | 112085665 | -    |
| 12744 | 1426693_x_at | Region | Cox15         | 226139 | 19   | 43279531  | 43297387  | -    |
| 12745 | 1452398_at   | Region | Plce1         | 74055  | 19   | 37868000  | 38127104  | +    |
| 12746 | 1420995_at   | Region | Plxna3        | 18846  | X    | 68989754  | 69004418  | +    |
| 12747 | 1428850_x_at | Region | 2410026K10Rik | 66478  | NONE | NONE      | NONE      | NONE |

|       |              |        |                   |        |      |           |           |      |
|-------|--------------|--------|-------------------|--------|------|-----------|-----------|------|
| 12748 | 1433908_a_at | Region | Cttn              | 13043  | 7    | 138848729 | 138882584 | -    |
| 12749 | 1439102_at   | Region | Falz              | 207165 | 11   | 106856593 | 106978743 | -    |
| 12750 | 1418021_at   | Region | C4                | 12268  | 17   | 32432437  | 32448043  | -    |
| 12751 | 1417387_at   | Region | Med31             | 67279  | 11   | 71937382  | 71941250  | -    |
| 12752 | 1419469_at   | Region | Gnb4              | 14696  | 3    | 31991704  | 32024713  | -    |
| 12753 | 1456162_x_at | Region | Add3              | 27360  | 19   | 52767533  | 52814957  | +    |
| 12754 | 1460092_at   | Region | Lsamp             | 268890 | 16   | 40710888  | 41011281  | +    |
| 12755 | 1429299_at   | Region | Ddah1             | 69219  | 3    | 144733606 | 144866062 | +    |
| 12756 | 1419156_at   | Region | Sox4              | 20677  | 13   | 28430338  | 28433304  | -    |
| 12757 | 1444345_at   | Region | None              | None   | 4    | 141318858 | 141319798 | -    |
| 12758 | 1434013_at   | Region | Ablim3            | 319713 | 18   | 62028204  | 62140635  | -    |
| 12759 | 1445029_at   | Region | A330019N05Rik     | 215890 | 10   | 33567437  | 33679703  | -    |
| 12760 | 1423730_at   | Region | C130052I12Rik     | 218335 | 13   | 69663073  | 69679813  | +    |
| 12761 | 1436045_at   | Region | Al843383          | 98442  | 1    | 38126501  | 38127844  | -    |
| 12762 | 1436511_at   | Region | BC031781          | 208768 | 1    | 180804971 | 180821933 | +    |
| 12763 | 1427357_at   | Region | Cda               | 72269  | 4    | 137219789 | 137249216 | -    |
| 12764 | 1417199_at   | Region | 1300007B12Rik     | 57439  | 1    | 134195640 | 134212218 | -    |
| 12765 | 1433999_at   | Region | Sik               | 20874  | 19   | 47131319  | 47193755  | +    |
| 12766 | 1455040_s_at | Region | 1110062M06Rik     | 68850  | X    | 96692991  | 96693416  | +    |
| 12767 | 1436175_at   | Region | A430107N12Rik     | 78432  | 14   | 12568309  | 12569448  | +    |
| 12768 | 1429176_at   | Region | Lrsam1            | 227738 | 2    | 32857382  | 32893413  | -    |
| 12769 | 1426671_a_at | Region | Rnpc2             | 170791 | 2    | 155604575 | 155637077 | -    |
| 12770 | 1420411_a_at | Region | Pi4k2b            | 67073  | 5    | 51551747  | 51579476  | +    |
| 12771 | 1460604_at   | Region | Cybrd1            | 73649  | 2    | 70805450  | 70839291  | +    |
| 12772 | 1456873_at   | Region | Clic5             | 224796 | 17   | 41693345  | 41782570  | +    |
| 12773 | 1415814_at   | Region | Atp6v1b2          | 11966  | 8    | 68237311  | 68262233  | +    |
| 12774 | 1438764_at   | Region | Anxa7             | 11750  | 14   | 18816589  | 18841128  | -    |
| 12775 | 1427420_at   | Region | Nkx6-2            | 14912  | 7    | 133975237 | 133978657 | -    |
| 12776 | 1428944_at   | Region | 5730469D23Rik     | 231380 | 5    | 85372730  | 85434753  | -    |
| 12777 | 1434478_at   | Region | Heca              | 380629 | 10   | 17823383  | 17874863  | -    |
| 12778 | 1437364_at   | Region | Coq3              | 230027 | 4    | 21949046  | 21981497  | +    |
| 12779 | 1416468_at   | Region | Aldh1a1           | 11668  | 19   | 19842337  | 19883555  | +    |
| 12780 | 1441974_at   | Region | None              | None   | 18   | 33415337  | 33416619  | +    |
| 12781 | 1433543_at   | Region | Anln              | 68743  | 9    | 22222408  | 22279584  | -    |
| 12782 | 1420497_a_at | Region | Cebpz             | 12607  | 17   | 76742080  | 76759276  | -    |
| 12783 | 1451006_at   | Region | Xdh               | 22436  | 17   | 71655241  | 71734545  | -    |
| 12784 | 1456394_at   | Region | 1500019C06Rik     | 72772  | 5    | 22251612  | 22284194  | +    |
| 12785 | 1450988_at   | Region | Lgr5              | 14160  | 10   | 115138993 | 115274843 | -    |
| 12786 | 1429253_at   | Region | Zfp262            | 67785  | 4    | 125890741 | 125995291 | -    |
| 12787 | 1454610_at   | Region | 38602             | 235072 | 9    | 25147069  | 25202879  | +    |
| 12788 | 1460228_at   | Region | Usf2              | 22282  | 7    | 26353591  | 26364359  | -    |
| 12789 | 1421384_at   | Region | Lyst              | 17101  | 13   | 13033273  | 13222595  | +    |
| 12790 | 1428207_at   | Region | Bcl7a             | 77045  | 5    | 122516563 | 122546119 | +    |
| 12791 | 1451542_at   | Region | Ssbp2             | 66970  | 13   | 87661341  | 87840293  | +    |
|       |              |        | Ubx4 ///          |        |      |           |           |      |
| 12792 | 1425020_at   | Region | LOC432749         | 217379 | 12   | 4054763   | 4083224   | -    |
| 12793 | 1455815_a_at | Region | Ywhab             | 54401  | 2    | 163452166 | 163475556 | +    |
| 12794 | 1457124_at   | Region | None              | None   | 7    | 116945052 | 116945343 | +    |
| 12795 | 1439610_at   | Region | None              | None   | 18   | 70209259  | 70209884  | -    |
| 12796 | 1431528_at   | Region | 5830427D02Rik     | 76042  | NONE | NONE      | NONE      | NONE |
| 12797 | 1437469_at   | Region | A030007D23Rik     | 319530 | 11   | 121332071 | 121340395 | -    |
| 12798 | 1455064_at   | Region | Rab36             | 76877  | 10   | 75138289  | 75155300  | +    |
| 12799 | 1441054_at   | Region | Apol2             | 239552 | 15   | 77799756  | 77807230  | -    |
| 12800 | 1426677_at   | Region | Flna              | 192176 | X    | 68884445  | 68910522  | -    |
| 12801 | 1440822_x_at | Region | Reps1             | 19707  | 10   | 18013924  | 18049606  | +    |
| 12802 | 1425591_a_at | Region | Chmp2a            | 68953  | 7    | 11025700  | 11028425  | -    |
| 12803 | 1427978_at   | Region | 4732418C07Rik     | 230648 | 4    | 114696978 | 114736232 | +    |
| 12804 | 1434694_at   | Region | Lrrc8             | 241296 | 2    | 30169884  | 30214310  | +    |
| 12805 | 1430034_at   | Region | Cct4              | 12464  | 11   | 22885383  | 22898126  | +    |
| 12806 | 1448038_at   | Region | None              | None   | 15   | 89123488  | 89126156  | -    |
| 12807 | 1450396_at   | Region | Stag2             | 20843  | X    | 36722649  | 36796970  | +    |
| 12808 | 1426822_at   | Region | Rhot2             | 214952 | 17   | 23644999  | 23651012  | -    |
| 12809 | 1441258_at   | Region | AF529169          | 209743 | 9    | 89477917  | 89510874  | -    |
|       |              |        | 4933424M23Rik /// |        |      |           |           |      |
| 12810 | 1454046_x_at | Region | LOC260345         | 260345 | 11   | 117821888 | 117845019 | +    |

|       |              |        |                 |        |      |           |           |      |
|-------|--------------|--------|-----------------|--------|------|-----------|-----------|------|
| 12811 | 1416179_a_at | Region | Rdx             | 19684  | 9    | 52120601  | 52161012  | +    |
| 12812 | 1427898_at   | Region | Rnf6            | 74132  | 5    | 145096046 | 145108279 | -    |
| 12813 | 1434970_a_at | Region | None            | None   | 1    | 4736769   | 4738037   | -    |
| 12814 | 1424490_at   | Region | 2410005H09Rik   | 232969 | 7    | 19682802  | 19691283  | +    |
| 12815 | 1455861_at   | Region | Epb4.1l5        | 226352 | 1    | 119299565 | 119400370 | -    |
| 12816 | 1423432_at   | Region | Phip            | 83946  | 9    | 83198955  | 83305205  | -    |
| 12817 | 1437257_at   | Region | Wdr47           | 99512  | 3    | 108387159 | 108441461 | +    |
| 12818 | 1457040_at   | Region | Lgi2            | 246316 | 5    | 51348717  | 51377137  | -    |
| 12819 | 1454787_at   | Region | Zdhhc9          | 208884 | X    | 42692767  | 42729479  | -    |
| 12820 | 1424431_at   | Region | MGI:1926002     | 78752  | 6    | 118540028 | 118571686 | -    |
| 12821 | 1435986_x_at | Region | Sdhc            | 66052  | 1    | 171058005 | 171079442 | -    |
| 12822 | 1426434_at   | Region | Tmem43          | 74122  | 6    | 91922874  | 91937581  | +    |
| 12823 | 1418768_at   | Region | Opa1            | 74143  | 16   | 28375142  | 28448290  | +    |
| 12824 | 1439927_at   | Region | None            | None   | 10   | 79917657  | 79918235  | +    |
| 12825 | 1448117_at   | Region | Kitl            | 17311  | 10   | 99997658  | 100082002 | +    |
| 12826 | 1417562_at   | Region | Eif4ebp1        | 13685  | 8    | 25994476  | 26010747  | +    |
| 12827 | 1424080_at   | Region | Dcps            | 69305  | 9    | 35038458  | 35090031  | -    |
| 12828 | 1431177_a_at | Region | Rpl10a          | 19896  | 17   | 26125374  | 26127806  | +    |
| 12829 | 1453168_at   | Region | 1700029J07Rik   | 69479  | 8    | 44894553  | 44916210  | -    |
| 12830 | 1445900_at   | Region | None            | None   | 16   | 32899003  | 32899863  | -    |
| 12831 | 1416982_at   | Region | Foxo1           | 56458  | 3    | 51900114  | 51981292  | +    |
| 12832 | 1434235_at   | Region | Slc20a2         | 20516  | 8    | 21228953  | 21324191  | +    |
| 12833 | 1448341_a_at | Region | Stxbp2          | 20911  | 8    | 36313     | 47968     | +    |
| 12834 | 1439327_at   | Region | Ccbe1           | 320924 | 18   | 66290942  | 66524129  | -    |
| 12835 | 1457729_at   | Region | None            | None   | 5    | 145471612 | 145472514 | -    |
| 12836 | 1438156_x_at | Region | Cpt1a           | 12894  | 19   | 3137883   | 3174426   | +    |
| 12837 | 1439015_at   | Region | Gfra1           | 14585  | 19   | 57822423  | 58054639  | -    |
| 12838 | 1443233_at   | Region | Gtf2f2          | 68705  | 14   | 70239863  | 70353356  | -    |
| 12839 | 1426043_a_at | Region | Capn3           | 12335  | 2    | 119977722 | 120018348 | +    |
| 12840 | 1429240_at   | Region | Stard4          | 170459 | 18   | 33424453  | 33436848  | -    |
| 12841 | 1428805_at   | Region | Slc35e3         | 215436 | 10   | 117424670 | 117437350 | -    |
| 12842 | 1433473_x_at | Region | Tm2d2           | 69742  | 8    | 23740385  | 23746364  | +    |
| 12843 | 1437107_at   | Region | Rab6b           | 270192 | 9    | 103083792 | 103160522 | +    |
| 12844 | 1436897_at   | Region | Mfhas1          | 52065  | 8    | 34390870  | 34482521  | +    |
| 12845 | 1450623_at   | Region | Gnb2            | 14693  | 5    | 136478995 | 136484097 | -    |
| 12846 | 1422607_at   | Region | Etv1            | 14009  | 12   | 35383685  | 35470632  | +    |
| 12847 | 1436401_at   | Region | 9330128J19Rik   | 271144 | 13   | 92607460  | 92662524  | -    |
| 12848 | 1451517_at   | Region | Rhobtb2         | 246710 | 14   | 64100920  | 64121398  | -    |
| 12849 | 1416437_a_at | Region | Mapk8ip3        | 30957  | 17   | 22703470  | 22742877  | -    |
| 12850 | 1449855_s_at | Region | Uchl3 /// Uchl4 | 50933  | 14   | 96180426  | 96270208  | +    |
| 12851 | 1434472_at   | Region | Dusp3           | 72349  | 11   | 101795246 | 101805857 | -    |
| 12852 | 1419008_at   | Region | Npy5r           | 18168  | 8    | 65789090  | 65797217  | -    |
| 12853 | 1418231_at   | Region | Lims1           | 110829 | 10   | 58281059  | 58380568  | +    |
| 12854 | 1449987_at   | Region | Alk             | 11682  | 17   | 69645483  | 70378834  | -    |
| 12855 | 1420441_at   | Region | Cenpc1          | 12617  | 5    | 85274034  | 85327481  | -    |
| 12856 | 1439027_at   | Region | C330023M02Rik   | 231713 | 5    | 120549789 | 120591920 | +    |
| 12857 | 1438993_a_at | Region | Atp6v1d         | 73834  | 12   | 75699581  | 75718058  | -    |
| 12858 | 1420807_a_at | Region | Egfl9           | 106565 | 17   | 43807132  | 43812952  | +    |
| 12859 | 1425911_a_at | Region | Fgfr1           | 14182  | 8    | 24257087  | 24299020  | +    |
| 12860 | 1448779_at   | Region | Ciz1            | 68379  | 2    | 32295396  | 32310459  | +    |
| 12861 | 1417175_at   | Region | Csnk1e          | 27373  | 15   | 79469142  | 79493293  | -    |
| 12862 | 1440202_at   | Region | None            | None   | NONE | NONE      | NONE      | NONE |
| 12863 | 1435589_at   | Region | Al842788        | 240514 | 19   | 5245329   | 5246339   | -    |
| 12864 | 1436489_x_at | Region | C85492          | 215494 | 9    | 122004262 | 122016175 | -    |
| 12865 | 1422470_at   | Region | Bnip3           | 12176  | 7    | 133277078 | 133295748 | -    |
| 12866 | 1452367_at   | Region | Coro2a          | 107684 | 4    | 46453481  | 46482362  | -    |
| 12867 | 1417080_a_at | Region | MGI:1349469     | 26940  | 9    | 21963660  | 21976223  | -    |
| 12868 | 1460401_at   | Region | 2310050N11Rik   | 66967  | 1    | 151613030 | 151679348 | +    |
| 12869 | 1425968_s_at | Region | Apeg1           | 11790  | 1    | 75666020  | 75723037  | +    |
| 12870 | 1447936_at   | Region | 2410006H16Rik   | 69221  | 11   | 62328546  | 62330460  | +    |
| 12871 | 1436791_at   | Region | Wnt5a           | 22418  | 14   | 26642805  | 26662537  | +    |
| 12872 | 1422223_at   | Region | Grin2b          | 14812  | 6    | 136493368 | 136805571 | -    |
| 12873 | 1455869_at   | Region | Camk2b          | 12323  | 11   | 5864459   | 5960535   | -    |
| 12874 | 1451429_at   | Region | 5730466C23Rik   | 70575  | 8    | 105011889 | 105054467 | -    |
| 12875 | 1444765_at   | Region | Rbpms           | 19663  | 8    | 32589665  | 32735420  | -    |

|       |              |        |               |        |      |           |           |      |
|-------|--------------|--------|---------------|--------|------|-----------|-----------|------|
| 12876 | 1415980_at   | Region | Atp5g2        | 67942  | 15   | 102723287 | 102731466 | -    |
| 12877 | 1447585_s_at | Region | Mrps6         | 121022 | 16   | 91215580  | 91269471  | +    |
| 12878 | 1426802_at   | Region | 38603         | 20362  | 11   | 53272641  | 53296937  | +    |
| 12879 | 1443468_at   | Region | 4631427C17Rik | 74340  | 6    | 29815630  | 29959406  | +    |
| 12880 | 1423260_at   | Region | Id4           | 15904  | 13   | 47859485  | 47862094  | +    |
| 12881 | 1431896_at   | Region | 4930447C04Rik | 75801  | 12   | 69728240  | 69764946  | -    |
| 12882 | 1431126_a_at | Region | 0610011F06Rik | 68347  | 17   | 23682250  | 23683893  | +    |
| 12883 | 1426609_at   | Region | 2810028N01Rik | 72662  | 14   | 93601375  | 93623845  | -    |
| 12884 | 1422677_at   | Region | Dgat2         | 67800  | 7    | 93245028  | 93274078  | -    |
| 12885 | 1457674_at   | Region | Vps13a        | 271564 | 19   | 15839467  | 15841015  | -    |
| 12886 | 1460652_at   | Region | Esrra         | 26379  | 19   | 6624825   | 6635618   | -    |
| 12887 | 1429005_at   | Region | Mfhas1        | 52065  | 8    | 34390870  | 34482521  | +    |
| 12888 | 1452209_at   | Region | Pkp4          | 227937 | 2    | 59016420  | 59210603  | +    |
| 12889 | 1450839_at   | Region | D0H4S114      | 27528  | 18   | 33660051  | 33686464  | -    |
| 12890 | 1435407_at   | Region | None          | None   | NONE | NONE      | NONE      | NONE |
| 12891 | 1421746_a_at | Region | Fbxo17        | 50760  | 7    | 24122746  | 24144393  | +    |
| 12892 | 1449836_x_at | Region | Biklk         | 12124  | 15   | 83575461  | 83593234  | +    |
| 12893 | 1418234_s_at | Region | Bcas2         | 68183  | 3    | 102599261 | 102606342 | +    |
| 12894 | 1426865_a_at | Region | Ncam1         | 17967  | 9    | 49555319  | 49607941  | -    |
| 12895 | 1450675_at   | Region | Smap1l        | 69780  | 4    | 119990768 | 120039691 | -    |
| 12896 | 1427610_at   | Region | Dsp           | 109620 | 13   | 37690386  | 37736832  | +    |
| 12897 | 1420911_a_at | Region | Mfge8         | 17304  | 7    | 72925876  | 72941120  | -    |
| 12898 | 1436950_at   | Region | Crkl          | 12929  | 16   | 16222955  | 16257223  | +    |
| 12899 | 1424261_at   | Region | Zfp672        | 319475 | 11   | 58040845  | 58048742  | -    |
| 12900 | 1451973_at   | Region | Ube1dc1       | 66663  | 9    | 104024992 | 104040598 | -    |
| 12901 | 1434882_at   | Region | Mtdh          | 67154  | 15   | 34082454  | 34141052  | +    |
| 12902 | 1417009_at   | Region | C1r           | 50909  | 6    | 125225539 | 125236397 | +    |
| 12903 | 1428443_a_at | Region | Rap1ga1       | 110351 | 4    | 136546029 | 136611121 | +    |
| 12904 | 1428834_at   | Region | Dusp4         | 319520 | 8    | 33606678  | 33618962  | +    |
| 12905 | 1448155_at   | Region | Pdc6ip        | 18571  | 9    | 113708127 | 113760882 | -    |
| 12906 | 1439724_at   | Region | BC051080      | 237422 | 10   | 84812276  | 84911107  | +    |
| 12907 | 1428153_at   | Region | Mrps10        | 64657  | 17   | 44887657  | 44897139  | +    |
| 12908 | 1427080_at   | Region | 2610036D13Rik | 75425  | 2    | 157438772 | 157466327 | -    |
| 12909 | 1441254_at   | Region | 1810008K04Rik | 69067  | 1    | 62934717  | 62935303  | +    |
| 12910 | 1425118_at   | Region | Spire2        | 234857 | 8    | 122707614 | 122744415 | +    |
| 12911 | 1440287_at   | Region | 1110014D18Rik | 68501  | 15   | 59384784  | 59612226  | +    |
| 12912 | 1435852_at   | Region | Spred3        | 101809 | 7    | 24570238  | 24580023  | -    |
| 12913 | 1457470_at   | Region | D3Ertd452e    | 51898  | 3    | 26922446  | 26923130  | -    |
| 12914 | 1416828_at   | Region | LOC545465     | 545465 | 2    | 136227307 | 136296207 | +    |
| 12915 | 1455204_at   | Region | Pitpnc1       | 71795  | 11   | 107033195 | 107291788 | -    |
| 12916 | 1428931_a_at | Region | Parp6         | 67287  | 9    | 59734045  | 59767165  | +    |
| 12917 | 1420634_a_at | Region | Smad2         | 17126  | 18   | 76478323  | 76539930  | +    |
| 12918 | 1448463_at   | Region | 4933434E20Rik | 99650  | 3    | 89863255  | 89872865  | +    |
| 12919 | 1452946_a_at | Region | 3222401M22Rik | 74013  | 1    | 55471318  | 55527941  | -    |
| 12920 | 1417907_at   | Region | Ube2l3        | 22195  | 16   | 15923031  | 15972515  | -    |
| 12921 | 1457256_x_at | Region | Ptch2         | 19207  | 4    | 116055261 | 116073736 | +    |
| 12922 | 1433494_at   | Region | Dos           | 216164 | 10   | 80253788  | 80255210  | -    |
| 12923 | 1435085_at   | Region | None          | None   | 6    | 135615772 | 135616400 | +    |
| 12924 | 1427072_at   | Region | Stard8        | 236920 | X    | 93644026  | 93676089  | +    |
| 12925 | 1424114_s_at | Region | Lamb1-1       | 16777  | 12   | 27840552  | 27905646  | +    |
| 12926 | 1416244_a_at | Region | Cnbp1         | 12785  | 6    | 88279741  | 88287657  | -    |
| 12927 | 1428263_a_at | Region | Tceb2         | 67673  | 17   | 21626920  | 21631289  | -    |
| 12928 | 1452179_at   | Region | Phf17         | 269424 | 3    | 41010564  | 41046427  | +    |
| 12929 | 1426319_at   | Region | Pdgfd         | 71785  | 9    | 6119514   | 6328427   | +    |
| 12930 | 1416872_at   | Region | Tspan6        | 56496  | X    | 127436007 | 127443302 | -    |
| 12931 | 1457672_at   | Region | Chd9          | 109151 | 8    | 90338072  | 90341034  | +    |
| 12932 | 1426977_at   | Region | Usp47         | 74996  | 7    | 105876643 | 105964517 | +    |
| 12933 | 1421386_at   | Region | Ankrd6        | 140577 | 4    | 33082828  | 33202298  | -    |
| 12934 | 1437793_at   | Region | 5430432P15Rik | 74493  | 19   | 36161291  | 36235550  | +    |
| 12935 | 1460449_at   | Region | C030032C09Rik | 77531  | 10   | 90548071  | 90943317  | +    |
| 12936 | 1439153_at   | Region | lbrdc2        | 218215 | 13   | 46720793  | 46844544  | +    |
| 12937 | 1454809_at   | Region | Ncoa7         | 211329 | 10   | 30689068  | 30845679  | -    |
| 12938 | 1453253_a_at | Region | Rpusd1        | 106707 | 17   | 23533751  | 23537456  | +    |
| 12939 | 1444357_at   | Region | None          | None   | 12   | 49826497  | 49894078  | +    |
| 12940 | 1424331_at   | Region | Rab40c        | 224624 | 17   | 23689151  | 23711170  | -    |

|       |              |        |                |        |      |           |           |      |
|-------|--------------|--------|----------------|--------|------|-----------|-----------|------|
| 12941 | 1428657_at   | Region | B930013M22Rik  | 68750  | 13   | 37486050  | 37490651  | +    |
| 12942 | 1417480_at   | Region | Fbxo9          | 71538  | 9    | 78250521  | 78277651  | -    |
| 12943 | 1448179_at   | Region | Usmg5          | 66477  | 19   | 46634768  | 46641933  | -    |
| 12944 | 1453688_at   | Region | Cwf19I2        | 244672 | 9    | 3307769   | 3382920   | +    |
| 12945 | 1419845_at   | Region | Dlx1           | 13390  | 2    | 71227188  | 71231723  | +    |
| 12946 | 1415869_a_at | Region | Trim28         | 21849  | 7    | 11017842  | 11024710  | +    |
| 12947 | 1417465_at   | Region | Fnta           | 14272  | 8    | 24723471  | 24740350  | -    |
| 12948 | 1435184_at   | Region | B430320C24Rik  | 319900 | 15   | 11651405  | 11653133  | -    |
| 12949 | 1423451_at   | Region | Pgrmc1         | 53328  | X    | 31218779  | 31226633  | +    |
| 12950 | 1429256_at   | Region | Gtl2           | 17263  | 12   | 105023823 | 105039917 | +    |
| 12951 | 1416424_at   | Region | M6prbp1        | 66905  | 17   | 53916003  | 53927552  | -    |
| 12952 | 1437457_a_at | Region | Mtpn           | 14489  | 6    | 35603109  | 35634015  | -    |
| 12953 | 1433612_at   | Region | Ap2s1          | 232910 | 7    | 13688769  | 13699919  | +    |
| 12954 | 1458365_at   | Region | Scyl1bp1       | 98376  | 1    | 163300126 | 163318858 | -    |
| 12955 | 1436096_at   | Region | None           | None   | 6    | 31592775  | 31593795  | +    |
| 12956 | 1427343_at   | Region | Rasd2          | 75141  | 8    | 74417802  | 74428505  | +    |
| 12957 | 1433989_at   | Region | Gabt4          | 243616 | 6    | 114701558 | 114820031 | +    |
| 12958 | 1436078_at   | Region | Fcho1          | 74015  | 8    | 70858707  | 70875819  | -    |
| 12959 | 1453212_at   | Region | Zfp383         | 73729  | 7    | 25322940  | 25331524  | +    |
| 12960 | 1426245_s_at | Region | Mapre2         | 212307 | 18   | 24032480  | 24122349  | +    |
| 12961 | 1433787_at   | Region | B230343H07Rik  | 338352 | 7    | 45020925  | 45021769  | +    |
| 12962 | 1422990_at   | Region | Met            | 17295  | 6    | 17474685  | 17555267  | +    |
| 12963 | 1442075_at   | Region | AI314604       | 102027 | 8    | 46042804  | 46043565  | +    |
| 12964 | 1449304_at   | Region | 2310061J03Rik  | 66391  | 16   | 54869202  | 54870477  | -    |
| 12965 | 1431069_at   | Region | 4930544G21Rik  | 77629  | 1    | 83594365  | 83738121  | -    |
| 12966 | 1438606_a_at | Region | Clic4          | 29876  | 4    | 134095226 | 134154017 | -    |
| 12967 | 1435167_at   | Region | Ranbp6         | 240614 | 19   | 29060997  | 29065552  | -    |
| 12968 | 1458371_at   | Region | 1110051M20Rik  | 228356 | 2    | 90982577  | 91149391  | -    |
| 12969 | 1431302_a_at | Region | Nudt7          | 67528  | 8    | 113433067 | 113451764 | +    |
| 12970 | 1429134_at   | Region | Hivep3         | 16656  | 4    | 119003584 | 119157855 | +    |
| 12971 | 1430622_at   | Region | 4833423F13Rik  | 73756  | 16   | 22077372  | 22078784  | +    |
| 12972 | 1429979_a_at | Region | 1810073N04Rik  | 72055  | 11   | 119925064 | 119972367 | -    |
| 12973 | 1457212_at   | Region | E530011G23Rik  | 319856 | 12   | 85714559  | 85715194  | +    |
| 12974 | 1435126_at   | Region | Dusp15         | 252864 | 2    | 152401869 | 152408341 | -    |
| 12975 | 1450063_at   | Region | Fmn2           | 54418  | 1    | 174435022 | 174755223 | +    |
| 12976 | 1417285_a_at | Region | Ndufa5         | 68202  | 6    | 24568151  | 24577172  | -    |
| 12977 | 1421828_at   | Region | Kpna3          | 16648  | 14   | 55898702  | 55974523  | -    |
| 12978 | 1439790_at   | Region | None           | None   | 13   | 32496551  | 32497249  | +    |
| 12979 | 1425769_x_at | Region | Cklf           | 75458  | 8    | 103545239 | 103557779 | +    |
| 12980 | 1423297_at   | Region | Add3           | 27360  | 19   | 52767533  | 52814957  | +    |
| 12981 | 1460545_at   | Region | Thrap3         | 230753 | 4    | 125199956 | 125213701 | -    |
| 12982 | 1434754_at   | Region | Garnl4         | 380711 | 11   | 74109019  | 74113127  | -    |
| 12983 | 1444001_at   | Region | Strbp          | 20744  | 2    | 37415390  | 37579381  | -    |
| 12984 | 1451336_at   | Region | Lgals4         | 16855  | 7    | 24240082  | 24247836  | +    |
| 12985 | 1424253_at   | Region | 1810073G14Rik  | 67726  | 11   | 57208629  | 57244244  | -    |
| 12986 | 1416251_at   | Region | Mcm6           | 17219  | 1    | 128174585 | 128202650 | -    |
| 12987 | 1427235_at   | Region | Utx            | 22289  | X    | 16401607  | 16518298  | +    |
| 12988 | 1433137_at   | Region | 5031415H12Rik  | 75984  | 17   | 68523143  | 68524423  | +    |
| 12989 | 1419580_at   | Region | None           | None   | 11   | 69744499  | 69771997  | +    |
| 12990 | 1434819_at   | Region | St6gal2        | 240119 | 17   | 53083562  | 53137071  | +    |
| 12991 | 1452813_a_at | Region | 5033428A16Rik  | 382030 | 8    | 87404151  | 87419831  | +    |
| 12992 | 1438324_at   | Region | 9330182L06Rik  | 231014 | 5    | 9273627   | 9491141   | +    |
| 12993 | 1416920_at   | Region | Rbm4           | 19653  | 19   | 4573943   | 4582649   | -    |
| 12994 | 1427918_a_at | Region | Rhoq           | 104215 | 17   | 84819915  | 84856873  | +    |
| 12995 | 1440322_at   | Region | Cugbp2         | 14007  | 2    | 6459141   | 6638885   | -    |
| 12996 | 1448611_at   | Region | D8Ert594e      | 52357  | 8    | 46797192  | 46960652  | -    |
| 12997 | 1457704_at   | Region | Zfp533         | 241494 | 2    | 77108849  | 77514565  | -    |
| 12998 | 1419538_at   | Region | Flt3           | 14255  | 5    | 146222241 | 146291790 | -    |
| 12999 | 1449152_at   | Region | Cdkn2b         | 12579  | NONE | NONE      | NONE      | NONE |
| 13000 | 1435917_at   | Region | ---            | 433904 | 5    | 72107568  | 72123547  | -    |
| 13001 | 1450977_s_at | Region | Ndrp1 /// Ndr1 | 17988  | 15   | 66953527  | 66993844  | -    |
| 13002 | 1455816_a_at | Region | Kctd3          | 226823 | 1    | 188502528 | 188539374 | -    |
| 13003 | 1435982_at   | Region | Stx12          | 100226 | 4    | 131814963 | 131845357 | -    |
| 13004 | 1448492_a_at | Region | Psm12          | 66997  | 11   | 107300617 | 107319125 | +    |
| 13005 | 1456086_x_at | Region | Pqbp1          | 54633  | X    | 6133463   | 6138168   | -    |

|       |              |        |               |        |    |           |           |   |
|-------|--------------|--------|---------------|--------|----|-----------|-----------|---|
| 13006 | 1455265_a_at | Region | Rgs16         | 19734  | 1  | 153624984 | 153630102 | + |
| 13007 | 1440946_at   | Region | None          | None   | 4  | 58904182  | 58904796  | + |
| 13008 | 1425631_at   | Region | Ppp1r3c       | 53412  | 19 | 36074403  | 36079323  | - |
| 13009 | 1443036_at   | Region | C630007C17Rik | 241514 | 2  | 81932610  | 81957628  | + |
| 13010 | 1426690_a_at | Region | Srebfl        | 20787  | 11 | 59924731  | 59946246  | - |
| 13011 | 1435874_at   | Region | Prkab2        | 108097 | 3  | 97153614  | 97159355  | + |
| 13012 | 1434566_a_at | Region | 4732496O08Rik | 242736 | 4  | 142327675 | 142336336 | + |
| 13013 | 1435015_at   | Region | 2210018M03Rik | 67109  | 7  | 5324839   | 5325605   | - |
| 13014 | 1424170_at   | Region | Phf5a         | 68479  | 15 | 81916034  | 81922620  | - |
| 13015 | 1419548_at   | Region | Kpna1         | 16646  | 16 | 34764772  | 34817569  | + |
| 13016 | 1428970_at   | Region | Mak3          | 72117  | 16 | 43023139  | 43046694  | + |
| 13017 | 1417514_at   | Region | Ssx2ip        | 99167  | 3  | 145381238 | 145416690 | + |
| 13018 | 1435677_at   | Region | C85492        | 215494 | 9  | 122004262 | 122016175 | - |
| 13019 | 1445531_at   | Region | Csmd1         | 94109  | 8  | 15273983  | 16089202  | - |
| 13020 | 1426213_at   | Region | Imp4          | 27993  | 1  | 34709403  | 34715250  | + |
| 13021 | 1443088_at   | Region | 9930031P18Rik | 319589 | 13 | 104089563 | 104090247 | - |
| 13022 | 1436917_s_at | Region | Gpsm1         | 67839  | 2  | 26247702  | 26280397  | + |
| 13023 | 1433508_at   | Region | Copeb         | 23849  | 13 | 5749069   | 5755318   | + |
| 13024 | 1454878_at   | Region | 2310047C04Rik | 224170 | 16 | 47767664  | 47835780  | - |
| 13025 | 1424859_at   | Region | Homer3        | 26558  | 8  | 69436115  | 69447552  | + |
| 13026 | 1422554_at   | Region | Ndn12         | 66647  | 7  | 58755688  | 58757078  | - |
| 13027 | 1452814_at   | Region | Cpne3         | 70568  | 4  | 19448948  | 19497068  | - |
| 13028 | 1424455_at   | Region | Gprasp1       | 67298  | X  | 129287631 | 129348407 | + |
| 13029 | 1452222_at   | Region | Utrn          | 22288  | 10 | 12263109  | 12646998  | - |
| 13030 | 1416742_at   | Region | Cfdp1         | 23837  | 8  | 111066062 | 111151899 | - |
| 13031 | 1429653_at   | Region | Gse1          | 382034 | 8  | 119846048 | 119938723 | + |
| 13032 | 1460682_s_at | Region | Ceacam2       | 26367  | 7  | 20680401  | 20704005  | - |
| 13033 | 1426680_at   | Region | Sepr1         | 74777  | 4  | 133498798 | 133503259 | - |
| 13034 | 1419289_a_at | Region | Syngr1        | 20972  | 15 | 80144003  | 80172200  | + |
| 13035 | 1429887_at   | Region | 2310005C01Rik | 76730  | 5  | 117086148 | 117087486 | + |
| 13036 | 1419593_at   | Region | MGI:2149712   | 268527 | 12 | 16037980  | 16123596  | - |
| 13037 | 1425094_a_at | Region | Lhx6          | 16874  | 2  | 36015701  | 36037433  | - |
| 13038 | 1437735_at   | Region | Ppp1r12a      | 17931  | 10 | 108049328 | 108167253 | + |
| 13039 | 1415837_at   | Region | Klk6          | 16612  | 7  | 38299769  | 38303949  | + |
| 13040 | 1434551_at   | Region | 1110031M08Rik | 68693  | 19 | 8016414   | 8030688   | + |
| 13041 | 1449130_at   | Region | Cd1d1         | 12479  | 3  | 86740227  | 86743729  | - |
| 13042 | 1417306_at   | Region | Tyk2          | 54721  | 9  | 20987596  | 21014720  | - |
| 13043 | 1449318_at   | Region | Tubg2         | 103768 | 11 | 100977008 | 100982874 | + |
| 13044 | 1416633_a_at | Region | 5730536A07Rik | 68250  | 9  | 66249938  | 66262282  | + |
| 13045 | 1452244_at   | Region | 6330406I15Rik | 70717  | 5  | 148350053 | 148369950 | + |
| 13046 | 1428353_at   | Region | Foxk2         | 68837  | 11 | 121080635 | 121128991 | + |
| 13047 | 1428968_at   | Region | 3110002L15Rik | 74360  | 9  | 13644844  | 13664101  | - |
| 13048 | 1422255_at   | Region | Kcna4         | 16492  | 2  | 106914441 | 106922291 | + |
| 13049 | 1426249_at   | Region | Adrbk1        | 110355 | 19 | 4074791   | 4094745   | - |
| 13050 | 1420669_at   | Region | Arnt2         | 11864  | 7  | 78100192  | 78263873  | - |
| 13051 | 1434221_at   | Region | BC030863      | 194404 | 6  | 121363681 | 121405625 | - |
| 13052 | 1428245_at   | Region | G6pc3         | 68401  | 11 | 102010786 | 102015168 | + |
| 13053 | 1456641_at   | Region | 1190007F08Rik | 68859  | 4  | 152512950 | 152518501 | - |
| 13054 | 1424039_at   | Region | 1810045K07Rik | 67887  | 8  | 32955623  | 32971540  | + |
| 13055 | 1437160_at   | Region | Nlgn1         | 192167 | 3  | 24847948  | 25748398  | - |
| 13056 | 1417757_at   | Region | Unc13b        | 22249  | 4  | 42974891  | 43180793  | + |
| 13057 | 1436004_at   | Region | Usp27x        | 54651  | X  | 5610216   | 5614766   | - |
| 13058 | 1435244_at   | Region | Vav2          | 22325  | 2  | 27195797  | 27358989  | - |
| 13059 | 1436885_a_at | Region | Cherp         | 27967  | 8  | 71610688  | 71625431  | - |
| 13060 | 1429355_at   | Region | 3300001K11Rik | 70426  | 16 | 10033010  | 10067443  | - |
| 13061 | 1424723_s_at | Region | Cstf3         | 228410 | 2  | 104295277 | 104370179 | + |
| 13062 | 1423682_a_at | Region | Cdca4         | 71963  | 12 | 108296070 | 108305225 | - |
| 13063 | 1436753_at   | Region | Adck5         | 268822 | 15 | 76627201  | 76646864  | + |
| 13064 | 1454807_a_at | Region | Snx12         | 55988  | X  | 95813629  | 95823851  | - |
| 13065 | 1431802_a_at | Region | D5Wsu178e     | 28042  | 5  | 28691083  | 28726735  | + |
| 13066 | 1419218_at   | Region | Ltap          | 93840  | 1  | 171933290 | 171956187 | - |
| 13067 | 1416158_at   | Region | Nr2f2         | 11819  | 7  | 64237865  | 64245019  | - |
| 13068 | 1437431_at   | Region | Cutl1         | 13047  | 5  | 135261627 | 135499343 | - |
| 13069 | 1434983_at   | Region | LOC545328     | 545328 | 1  | 75206289  | 75226218  | - |
| 13070 | 1458038_at   | Region | 1700034P14Rik | 73274  | 13 | 107815217 | 107879367 | - |

|       |              |        |                   |        |      |           |           |      |
|-------|--------------|--------|-------------------|--------|------|-----------|-----------|------|
| 13071 | 1429909_at   | Region | 4833411O04Rik     | 74608  | 2    | 101418966 | 101420735 | -    |
| 13072 | 1460241_a_at | Region | St3gal5           | 20454  | 6    | 72429820  | 72486545  | +    |
| 13073 | 1424194_at   | Region | Rcsd1             | 226594 | 1    | 165570866 | 165629791 | -    |
| 13074 | 1455495_at   | Region | AA536808          | 98214  | 1    | 156553004 | 156555188 | +    |
| 13075 | 1441224_at   | Region | None              | None   | X    | 128000851 | 128001513 | +    |
| 13076 | 1436434_at   | Region | 9230110J10        | 329958 | 4    | 135076532 | 135077312 | +    |
| 13077 | 1444669_at   | Region | None              | None   | 7    | 23872978  | 23874121  | +    |
| 13078 | 1455425_at   | Region | BB001228          | 103503 | 10   | 62771179  | 62772175  | -    |
| 13079 | 1423295_at   | Region | Tm9sf2            | 68059  | 14   | 116675627 | 116727419 | +    |
| 13080 | 1418865_at   | Region | Zfp385            | 29813  | 15   | 103376968 | 103403165 | -    |
| 13081 | 1458144_at   | Region | BC031353          | 235493 | 9    | 75115155  | 75171307  | +    |
| 13082 | 1454890_at   | Region | Amot              | 27494  | X    | 138889991 | 138927092 | -    |
| 13083 | 1428840_s_at | Region | Wdr53             | 68980  | 16   | 31056657  | 31066443  | +    |
| 13084 | 1452000_s_at | Region | Sars1             | 20226  | 3    | 108222354 | 108240911 | -    |
| 13085 | 1416068_at   | Region | Kars              | 85305  | 8    | 111291147 | 111308972 | -    |
| 13086 | 1456768_a_at | Region | Mmrn2             | 105450 | 14   | 32512110  | 32539866  | +    |
| 13087 | 1417007_a_at | Region | Vps4b             | 20479  | 1    | 106711939 | 106737457 | -    |
| 13088 | 1460305_at   | Region | Itga3             | 16400  | 11   | 94865569  | 94897801  | -    |
| 13089 | 1439184_s_at | Region | Txn15             | 52700  | 11   | 71933212  | 71936145  | +    |
| 13090 | 1423321_at   | Region | Myadm             | 50918  | 7    | 4169      | 12984     | -    |
| 13091 | 1449081_at   | Region | Ces3              | 104158 | 8    | 92449775  | 92481484  | -    |
| 13092 | 1438215_at   | Region | Sfrs3             | 20383  | 17   | 26839644  | 26846716  | +    |
| 13093 | 1452004_at   | Region | Calca             | 12310  | 7    | 108492491 | 108495488 | -    |
| 13094 | 1453418_at   | Region | Col24a1           | 71355  | 3    | 144282520 | 144343093 | +    |
| 13095 | 1455206_at   | Region | C130006E23        | 331563 | X    | 152964823 | 152967649 | +    |
| 13096 | 1417608_a_at | Region | Rpl13a            | 22121  | 7    | 39202318  | 39205277  | -    |
| 13097 | 1429164_at   | Region | Prss36            | 77613  | 7    | 121982640 | 121985907 | -    |
| 13098 | 1427941_at   | Region | Dicer1            | 192119 | 12   | 100135572 | 100196088 | -    |
| 13099 | 1451575_a_at | Region | Nudt3             | 56409  | 17   | 25375309  | 25419370  | -    |
| 13100 | 1435846_x_at | Region | None              | None   | 5    | 128897493 | 128898373 | +    |
| 13101 | 1449248_at   | Region | Cln2              | 12724  | 16   | 19475107  | 19488386  | -    |
| 13102 | 1417133_at   | Region | Pmp22             | 18858  | 11   | 62857160  | 62885196  | +    |
| 13103 | 1454962_at   | Region | Spire1            | 68166  | 18   | 67718995  | 67783507  | -    |
| 13104 | 1442325_at   | Region | C530046L02Rik     | 224617 | 17   | 21982357  | 22009100  | -    |
| 13105 | 1440295_at   | Region | 1110057K04Rik     | 68832  | 12   | 7453506   | 7531135   | +    |
| 13106 | 1448685_at   | Region | 2900010M23Rik     | 67267  | 17   | 24918583  | 24929809  | -    |
| 13107 | 1430516_at   | Region | 4930428B01Rik     | 73854  | NONE | NONE      | NONE      | NONE |
| 13108 | 1418372_at   | Region | Adsl              | 11564  | 15   | 81001138  | 81021992  | +    |
| 13109 | 1424822_at   | Region | 9630044O09Rik     | 105439 | 14   | 98195231  | 98249790  | +    |
| 13110 | 1430418_at   | Region | Tmem57            | 66146  | 4    | 133763662 | 133814033 | -    |
| 13111 | 1435348_at   | Region | D930009K15Rik     | 399585 | X    | 145812361 | 145813493 | +    |
|       |              |        | Hmgb1 ///         |        |      |           |           |      |
|       |              |        | LOC213079 ///     |        |      |           |           |      |
| 13112 | 1425048_a_at | Region | LOC545917         | 15289  | 5    | 147944154 | 147949960 | -    |
| 13113 | 1431644_a_at | Region | Ica1              | 15893  | 6    | 8605506   | 8727274   | -    |
| 13114 | 1423419_at   | Region | Lig3              | 16882  | 11   | 82520876  | 82541867  | +    |
| 13115 | 1427551_at   | Region | Usp29             | 57775  | 7    | 5934028   | 6173502   | +    |
| 13116 | 1427250_at   | Region | Atp2a2            | 11938  | 5    | 121605864 | 121654245 | -    |
| 13117 | 1424408_at   | Region | Lims2             | 225341 | 18   | 32171651  | 32198763  | +    |
| 13118 | 1422051_a_at | Region | Gabbr1            | 54393  | 17   | 34805575  | 34833793  | +    |
| 13119 | 1455199_at   | Region | AI429214          | 102069 | 8    | 35801976  | 35803100  | +    |
| 13120 | 1441445_at   | Region | Per3              | 18628  | 4    | 149497074 | 149536951 | -    |
| 13121 | 1416992_at   | Region | Mfng              | 17305  | 15   | 78807168  | 78824731  | -    |
| 13122 | 1448664_a_at | Region | Apeg1             | 11790  | 1    | 75666020  | 75723037  | +    |
| 13123 | 1438397_a_at | Region | Rnpc2             | 170791 | 2    | 155604575 | 155637077 | -    |
| 13124 | 1436759_x_at | Region | Cnn3              | 71994  | 3    | 120205773 | 120237098 | +    |
|       |              |        | 3300001H21Rik /// |        |      |           |           |      |
|       |              |        | MGI:3026615 ///   |        |      |           |           |      |
| 13125 | 1421184_a_at | Region | LOC554292         | 393082 | 15   | 100410740 | 100418501 | +    |
| 13126 | 1422754_at   | Region | Tmod1             | 21916  | 4    | 45976888  | 46030718  | +    |
| 13127 | 1424380_at   | Region | BC026744          | 330192 | 5    | 123175966 | 123203585 | -    |
| 13128 | 1436319_at   | Region | Sulf1             | 240725 | 1    | 12847254  | 12989080  | +    |
| 13129 | 1438420_at   | Region | Rnpc2             | 170791 | 2    | 155604575 | 155637077 | -    |
| 13130 | 1420959_at   | Region | Asph              | 65973  | 4    | 9376231   | 9595958   | -    |
| 13131 | 1437728_at   | Region | AW050020          | 268420 | 11   | 60263620  | 60281539  | +    |



|       |              |        |                      |        |      |           |           |      |
|-------|--------------|--------|----------------------|--------|------|-----------|-----------|------|
| 13132 | 1433850_at   | Region | Ppp4r2               | 232314 | 6    | 69893516  | 69896400  | +    |
| 13133 | 1439645_at   | Region | Adra2b               | 11552  | 2    | 126877139 | 126881074 | +    |
| 13134 | 1421096_at   | Region | Trpc1                | 22063  | 9    | 95610171  | 95653902  | -    |
| 13135 | 1436181_at   | Region | Ddef2                | 211914 | 12   | 18182     | 20637     | -    |
| 13136 | 1425173_s_at | Region | Golph3l<br>Mtap2 /// | 229593 | 3    | 95076790  | 95107073  | +    |
| 13137 | 1421327_at   | Region | A730034C02           | 17756  | 1    | 66613900  | 66731968  | +    |
| 13138 | 1428219_at   | Region | Rybp                 | 56353  | 6    | 100696164 | 100754244 | -    |
| 13139 | 1416479_a_at | Region | Tmem14c              | 66154  | 13   | 40576882  | 40583168  | +    |
| 13140 | 1423594_a_at | Region | Ednrh                | 13618  | 14   | 98359614  | 98388688  | -    |
| 13141 | 1416642_a_at | Region | Tpt1p                | 497210 | 6    | 70187826  | 70190793  | +    |
| 13142 | 1434010_at   | Region | Als2cr13             | 72750  | 1    | 60217249  | 60288662  | +    |
| 13143 | 1436223_at   | Region | None                 | None   | 12   | 114969500 | 114970422 | -    |
| 13144 | 1424239_at   | Region | 2310066E14Rik        | 75687  | 8    | 104889579 | 104917967 | +    |
| 13145 | 1449415_at   | Region | Chd1l                | 68058  | 3    | 97047022  | 97096464  | -    |
| 13146 | 1436577_at   | Region | Arhgef9              | 236915 | X    | 89650305  | 89797863  | -    |
| 13147 | 1442307_at   | Region | None                 | None   | 10   | 122795576 | 122796142 | -    |
| 13148 | 1447248_at   | Region | Slc39a12             | 277468 | 2    | 14314676  | 14421249  | +    |
| 13149 | 1455045_at   | Region | Srr                  | 27364  | 11   | 74632454  | 74651361  | -    |
| 13150 | 1416685_s_at | Region | Fbl ///<br>LOC545184 | 14113  | 7    | 23565500  | 23575021  | +    |
| 13151 | 1452846_at   | Region | Ppfia4               | 68507  | 1    | 134149042 | 134182786 | -    |
| 13152 | 1433921_s_at | Region | Zcs12                | 105638 | 14   | 30212767  | 30217780  | -    |
| 13153 | 1453024_at   | Region | Wdr37                | 207615 | 13   | 8762169   | 8828183   | -    |
| 13154 | 1427392_at   | Region | Dscaml1              | 114873 | 9    | 45443056  | 45766529  | +    |
| 13155 | 1433951_at   | Region | Arl5                 | 75423  | 2    | 52330113  | 52357036  | -    |
| 13156 | 1419435_at   | Region | Aox1                 | 11761  | 1    | 58334809  | 58411218  | +    |
| 13157 | 1443249_at   | Region | A530081L18Rik        | 320253 | 18   | 56982085  | 57143467  | -    |
| 13158 | 1434112_at   | Region | Lphn2                | 99633  | 3    | 147794533 | 147874904 | -    |
| 13159 | 1455549_at   | Region | Sestd1               | 228071 | 2    | 76884304  | 76942838  | -    |
| 13160 | 1426957_at   | Region | Trp53bp1             | 27223  | 2    | 120712100 | 120784969 | -    |
| 13161 | 1426700_a_at | Region | Usp52                | 103135 | 10   | 128040154 | 128058166 | +    |
| 13162 | 1436139_at   | Region | None                 | None   | 12   | 63245840  | 63246495  | -    |
| 13163 | 1439046_at   | Region | AI851076             | 237859 | 11   | 76769951  | 76804094  | -    |
| 13164 | 1424905_a_at | Region | Slc39a11             | 69806  | 11   | 113065947 | 113386861 | -    |
| 13165 | 1418002_at   | Region | 2010110M21Rik        | 67044  | 13   | 53200592  | 53201508  | +    |
| 13166 | 1455602_x_at | Region | C430010P07Rik        | 227227 | 1    | 67011628  | 67093590  | -    |
| 13167 | 1454084_a_at | Region | Senp8                | 71599  | 9    | 59852773  | 59867496  | -    |
| 13168 | 1452746_at   | Region | Atp13a2              | 74772  | 4    | 139868189 | 139888591 | +    |
| 13169 | 1449590_a_at | Region | Mras                 | 17532  | 9    | 99288432  | 99337984  | -    |
| 13170 | 1433851_at   | Region | None                 | None   | 6    | 101310462 | 101345533 | +    |
| 13171 | 1433594_at   | Region | Comm2                | 52245  | 3    | 57278796  | 57285107  | -    |
| 13172 | 1429320_at   | Region | 4921511116Rik        | 70925  | 8    | 46677113  | 46681564  | -    |
| 13173 | 1424480_s_at | Region | Akt2                 | 11652  | 7    | 22980718  | 23014488  | +    |
| 13174 | 1438370_x_at | Region | Dos                  | 216164 | NONE | NONE      | NONE      | NONE |
| 13175 | 1448382_at   | Region | Ehhadh               | 74147  | 16   | 20532801  | 20559307  | -    |
| 13176 | 1437044_a_at | Region | Gba                  | 14466  | 3    | 88959413  | 88965154  | +    |
| 13177 | 1428635_at   | Region | Comtd1               | 69156  | 14   | 20210529  | 20213578  | -    |
| 13178 | 1448247_at   | Region | Bcl7b                | 12054  | 5    | 134181984 | 134195337 | +    |
| 13179 | 1448970_at   | Region | 1200007B05Rik        | 67453  | 18   | 31819928  | 31849663  | -    |
| 13180 | 1417173_at   | Region | Crebl1               | 12915  | 17   | 32350416  | 32358414  | +    |
| 13181 | 1423425_at   | Region | 1300012G16Rik        | 71772  | 5    | 119635089 | 119655425 | -    |
| 13182 | 1424818_at   | Region | Alg12                | 223774 | 15   | 88857174  | 88871213  | -    |
| 13183 | 1452867_at   | Region | Col4a3bp             | 68018  | 13   | 92734071  | 92828876  | +    |
| 13184 | 1432344_a_at | Region | Ap1p2                | 11804  | 9    | 31068390  | 31130767  | -    |
| 13185 | 1438510_a_at | Region | Hars                 | 15115  | 18   | 36990295  | 37006885  | -    |
| 13186 | 1451527_at   | Region | Pcolce2              | 76477  | 9    | 95547765  | 95599093  | +    |
| 13187 | 1434033_at   | Region | Tle1                 | 21885  | 4    | 71208335  | 71292050  | -    |
| 13188 | 1418934_at   | Region | Mab21l2              | 23937  | 3    | 86289969  | 86292671  | -    |
| 13189 | 1449001_at   | Region | lvd                  | 56357  | 2    | 118375849 | 118395206 | +    |
| 13190 | 1427938_at   | Region | Mycbp                | 56309  | 4    | 122932163 | 122939256 | +    |
| 13191 | 1441948_x_at | Region | Tex27                | 21769  | 17   | 27815127  | 28020060  | +    |
| 13192 | 1433988_s_at | Region | C230098O21Rik        | 102153 | 8    | 68281185  | 68281915  | -    |
| 13193 | 1430109_at   | Region | 4833412E19Rik        | 73905  | 6    | 120441783 | 120443595 | -    |
| 13194 | 1447231_at   | Region | Slc8a1               | 20541  | 17   | 79218202  | 79483338  | -    |
| 13195 | 1434481_at   | Region | 4121402D02Rik        | 74026  | 11   | 98616603  | 98627514  | +    |



|       |              |        |               |        |    |           |           |   |
|-------|--------------|--------|---------------|--------|----|-----------|-----------|---|
| 13260 | 1460246_at   | Region | Mecp2         | 17257  | X  | 68687485  | 68746248  | - |
| 13261 | 1436692_at   | Region | None          | None   | 4  | 59704578  | 59704857  | + |
| 13262 | 1420984_at   | Region | Pctp          | 18559  | 11 | 89805684  | 89823952  | - |
| 13263 | 1417561_at   | Region | Apoc1         | 11812  | 7  | 16558729  | 16561817  | - |
| 13264 | 1451196_at   | Region | Ypel5         | 383295 | 17 | 70612621  | 70627590  | + |
| 13265 | 1426909_at   | Region | Al481316      | 98383  | 1  | 167156101 | 167157958 | - |
| 13266 | 1438089_a_at | Region | Bclaf1        | 72567  | 10 | 20239740  | 20267469  | + |
| 13267 | 1442971_at   | Region | 5830435C13Rik | 407823 | 2  | 59777374  | 59778133  | - |
| 13268 | 1417349_at   | Region | Pldn          | 18457  | 2  | 122252366 | 122261952 | + |
| 13269 | 1415873_a_at | Region | Actr1a        | 54130  | 19 | 45924156  | 45943077  | - |
| 13270 | 1456934_at   | Region | None          | None   | 4  | 15834477  | 15835032  | + |
| 13271 | 1454889_x_at | Region | Tmcc3         | 319880 | 10 | 94549417  | 94562436  | + |
| 13272 | 1417377_at   | Region | None          | None   | 9  | 47546173  | 47869344  | + |
| 13273 | 1459108_a_at | Region | Yeats2        | 208146 | 16 | 18922076  | 19003907  | + |
| 13274 | 1433852_at   | Region | C330002I19Rik | 77480  | 12 | 21526422  | 21612277  | + |
| 13275 | 1441208_at   | Region | None          | None   | 18 | 77095041  | 77095577  | + |
| 13276 | 1438500_at   | Region | B230206N24Rik | 210673 | 6  | 114064130 | 114069723 | - |
| 13277 | 1441465_at   | Region | Cnot3         | 232791 | 7  | 95942392  | 95943786  | - |
| 13278 | 1457285_at   | Region | Zfp187        | 432731 | 13 | 20922288  | 20923020  | - |
| 13279 | 1455189_at   | Region | 8030451N04Rik | 320735 | 3  | 102785285 | 102786163 | - |
| 13280 | 1419154_at   | Region | Tmprs2        | 50528  | 16 | 97049264  | 97095777  | + |
| 13281 | 1449297_at   | Region | Casp12        | 12364  | 9  | 5255895   | 5283427   | + |
| 13282 | 1423685_at   | Region | Aars          | 234734 | 8  | 110331687 | 110354590 | + |
| 13283 | 1418059_at   | Region | Elt1          | 170757 | 3  | 150417575 | 150524774 | + |
| 13284 | 1439657_at   | Region | LOC319980     | 319980 | 1  | 189058764 | 189059732 | + |
| 13285 | 1423916_s_at | Region | Mlf2          | 30853  | 6  | 125588244 | 125592912 | + |
| 13286 | 1421991_a_at | Region | Igfbp4        | 16010  | 11 | 98862347  | 98873733  | + |
| 13287 | 1418656_at   | Region | Lsm5          | 66373  | 6  | 56845388  | 56849008  | - |
| 13288 | 1416100_at   | Region | Eif3s7        | 55944  | 15 | 78010958  | 78022717  | - |
| 13289 | 1434243_s_at | Region | None          | None   | 16 | 56061063  | 56061574  | + |
| 13290 | 1423098_at   | Region | Capn7         | 12339  | 14 | 29468562  | 29503108  | + |
| 13291 | 1444494_at   | Region | None          | None   | 2  | 69539010  | 69539630  | + |
| 13292 | 1448340_at   | Region | Tmem30a       | 69981  | 9  | 79974649  | 79999130  | - |
| 13293 | 1428152_a_at | Region | Rpl18a        | 76808  | 8  | 70051092  | 70053111  | - |
| 13294 | 1438802_at   | Region | Foxp1         | 108655 | 6  | 99395348  | 99630926  | - |
| 13295 | 1449494_at   | Region | Rab3c         | 67295  | 13 | 106309703 | 106528782 | - |
| 13296 | 1423109_s_at | Region | Slc25a20      | 57279  | 9  | 108710938 | 108733881 | + |
| 13297 | 1454983_at   | Region | Al465301      | 102534 | 9  | 70739539  | 70742254  | - |
| 13298 | 1435641_at   | Region | 9530018I07Rik | 320137 | 1  | 37733814  | 37737383  | - |
| 13299 | 1450166_at   | Region | Ids           | 15931  | X  | 65014764  | 65033475  | - |
| 13300 | 1428674_at   | Region | Prpf38b       | 66921  | 3  | 108698549 | 108707446 | - |
| 13301 | 1433531_at   | Region | Acsl4         | 50790  | X  | 135758036 | 135830547 | - |
| 13302 | 1431385_a_at | Region | Mbtps1        | 56453  | 8  | 118850260 | 118901165 | - |
| 13303 | 1417219_s_at | Region | Tmsb10        | 19240  | 6  | 20039912  | 20040386  | + |
| 13304 | 1438349_at   | Region | BC043476      | 381067 | 17 | 19605202  | 19620447  | + |
| 13305 | 1437542_at   | Region | A730095J18Rik | 319462 | 1  | 69828384  | 69829626  | - |
| 13306 | 1442843_at   | Region | 4933411D12Rik | 74086  | 8  | 12498847  | 12499967  | + |
| 13307 | 1427325_s_at | Region | Al597013      | 100182 | 4  | 62458296  | 62471256  | - |
| 13308 | 1458768_at   | Region | Epb4.1l5      | 226352 | 1  | 119299565 | 119400370 | - |
| 13309 | 1447337_at   | Region | Dapp1         | 26377  | 3  | 136820534 | 136870453 | - |
| 13310 | 1448425_at   | Region | Eif3s10       | 13669  | 19 | 60361493  | 60391011  | - |
| 13311 | 1437296_at   | Region | Pkn2          | 109333 | 3  | 141762433 | 141850964 | - |
| 13312 | 1448347_a_at | Region | Gpiap1        | 53872  | 2  | 103469773 | 103502351 | - |
| 13313 | 1418484_at   | Region | Tekt2         | 24084  | 4  | 125349234 | 125352312 | - |
| 13314 | 1427248_at   | Region | Whsc2         | 24116  | 5  | 32386442  | 32424521  | - |
| 13315 | 1424924_at   | Region | Sec63         | 140740 | 10 | 42868086  | 42935647  | + |
| 13316 | 1449732_at   | Region | Zipro1        | 22697  | 5  | 137090159 | 137106967 | + |
| 13317 | 1448315_a_at | Region | Pycr2         | 69051  | 1  | 180858129 | 180861908 | + |
| 13318 | 1434358_x_at | Region | Rps21         | 66481  | 2  | 179974367 | 179975394 | + |
| 13319 | 1435644_at   | Region | G431001E03Rik | 268396 | 11 | 32242634  | 32318819  | + |
| 13320 | 1428717_at   | Region | Scrn1         | 69938  | 6  | 54653141  | 54710707  | - |
| 13321 | 1434448_at   | Region | MGI:105968    | 109658 | 4  | 128653196 | 128667753 | - |
| 13322 | 1428696_at   | Region | 2310015N21Rik | 76438  | 17 | 47525770  | 47722960  | - |
| 13323 | 1418106_at   | Region | Hey2          | 15214  | 10 | 30875100  | 30885524  | - |
| 13324 | 1436556_at   | Region | A930027H06Rik | 109218 | 6  | 42405839  | 42408433  | + |





|       |              |        |                   |        |      |           |           |      |
|-------|--------------|--------|-------------------|--------|------|-----------|-----------|------|
| 13455 | 1428068_at   | Region | 1110030L07Rik     | 68653  | 15   | 84240839  | 84264676  | +    |
| 13456 | 1418874_a_at | Region | Psmd4             | 19185  | 3    | 94520536  | 94530376  | -    |
| 13457 | 1422488_at   | Region | Nxt1              | 56488  | 2    | 148129578 | 148132959 | +    |
| 13458 | 1455139_at   | Region | Al851716          | 98463  | 1    | 72936468  | 72937738  | +    |
| 13459 | 1418162_at   | Region | Tlr4              | 21898  | 4    | 65919004  | 65933990  | +    |
| 13460 | 1450957_a_at | Region | Sqstm1            | 18412  | 11   | 49952993  | 49963631  | -    |
| 13461 | 1456914_at   | Region | AW209116          | 99896  | 3    | 107101334 | 107102010 | -    |
| 13462 | 1452170_at   | Region | 2010209O12Rik     | 100910 | 5    | 23052073  | 23056385  | +    |
| 13463 | 1427877_at   | Region | 2610312B22Rik     | 69082  | 2    | 83342327  | 83362366  | +    |
| 13464 | 1431390_a_at | Region | Grinl1a           | 28015  | 9    | 71612808  | 71620280  | -    |
| 13465 | 1460175_at   | Region | Rps23             | 66475  | 13   | 87055520  | 87057074  | +    |
| 13466 | 1423395_at   | Region | Tsnax             | 53424  | 8    | 124300320 | 124321515 | +    |
| 13467 | 1426483_at   | Region | Prkrir            | 72981  | 7    | 92794813  | 92809512  | +    |
| 13468 | 1436421_s_at | Region | Arpc5l            | 74192  | 2    | 38940301  | 38948034  | +    |
| 13469 | 1448176_a_at | Region | Hnrpk             | 15387  | 13   | 57024107  | 57034672  | -    |
| 13470 | 1416846_a_at | Region | Pdzrn3            | 55983  | 6    | 101625228 | 101853511 | -    |
| 13471 | 1443127_at   | Region | 9630021D06Rik     | 319926 | 6    | 63877608  | 63878170  | +    |
|       |              |        | Ube2i ///         |        |      |           |           |      |
|       |              |        | F830028O17Rik /// |        |      |           |           |      |
| 13472 | 1429545_at   | Region | LOC546265         | 22196  | 17   | 23066362  | 23080142  | -    |
|       |              |        | Slc25a5 ///       |        |      |           |           |      |
|       |              |        | LOC433923 ///     |        |      |           |           |      |
| 13473 | 1430542_a_at | Region | LOC545025         | 11740  | X    | 31416206  | 31419360  | +    |
| 13474 | 1425706_a_at | Region | Ddb2              | 107986 | 2    | 90916605  | 90941731  | -    |
| 13475 | 1435386_at   | Region | Vwf               | 22371  | 6    | 126209758 | 126347067 | +    |
| 13476 | 1440477_at   | Region | None              | None   | 2    | 164331594 | 164334746 | -    |
| 13477 | 1421059_a_at | Region | Alg2              | 56737  | 4    | 47385756  | 47390247  | -    |
| 13478 | 1418479_at   | Region | Vps54             | 245944 | 11   | 21134074  | 21215926  | +    |
| 13479 | 1425869_a_at | Region | Psen2             | 19165  | 1    | 180181252 | 180200147 | -    |
| 13480 | 1452777_a_at | Region | 6330412F12Rik     | 53312  | 5    | 23149873  | 23174275  | +    |
| 13481 | 1439190_at   | Region | 2900090M10Rik     | 329977 | 4    | 140797550 | 140803687 | -    |
| 13482 | 1423684_at   | Region | Hnrpk             | 15387  | 13   | 57024107  | 57034672  | -    |
|       |              |        | Gm166 ///         |        |      |           |           |      |
| 13483 | 1434634_at   | Region | LOC546002         | 233899 | 7    | 121636263 | 121638050 | -    |
| 13484 | 1448600_s_at | Region | Vav3              | 57257  | 3    | 109150078 | 109494759 | +    |
| 13485 | 1417429_at   | Region | Fmo1              | 14261  | 1    | 162739092 | 162775861 | -    |
| 13486 | 1428766_at   | Region | Rnmtl1            | 67390  | 11   | 75969428  | 75976280  | +    |
| 13487 | 1446245_at   | Region | None              | None   | 2    | 52794997  | 52795679  | +    |
| 13488 | 1456376_at   | Region | None              | None   | 2    | 155271934 | 155272202 | +    |
| 13489 | 1422834_at   | Region | Kcnd2             | 16508  | 6    | 21263145  | 21776841  | +    |
| 13490 | 1460278_a_at | Region | D15Wsu75e         | 28075  | 15   | 82043240  | 82066857  | -    |
| 13491 | 1434733_at   | Region | Stk36             | 269209 | 1    | 74903970  | 74936564  | +    |
| 13492 | 1421364_at   | Region | Lrfn1             | 80749  | 7    | 23860311  | 23868010  | +    |
| 13493 | 1416110_at   | Region | Slc35a4           | 67843  | 18   | 36903357  | 36907622  | +    |
| 13494 | 1435402_at   | Region | A930008A22Rik     | 235283 | 9    | 40248196  | 40406053  | -    |
| 13495 | 1427299_at   | Region | Rps6ka3           | 110651 | X    | 152855525 | 152962890 | +    |
| 13496 | 1456421_at   | Region | 4930578M01Rik     | 75951  | 15   | 99043181  | 99043924  | +    |
| 13497 | 1416951_a_at | Region | Atp6v1d           | 73834  | 12   | 75699581  | 75718058  | -    |
| 13498 | 1439160_at   | Region | 4732496O08Rik     | 242736 | 4    | 142327675 | 142336336 | +    |
| 13499 | 1434549_at   | Region | Rab11a            | 53869  | 9    | 64838434  | 64859957  | -    |
| 13500 | 1428499_at   | Region | 2810454L23Rik     | 72803  | NONE | NONE      | NONE      | NONE |
| 13501 | 1454811_a_at | Region | Tde2              | 56442  | 10   | 57778279  | 57794950  | -    |
| 13502 | 1437918_at   | Region | 4930539E08Rik     | 207819 | 17   | 26697621  | 26717498  | -    |
| 13503 | 1417810_a_at | Region | Kcnb1 /// Pacsin2 | 16500  | 2    | 166560111 | 166645532 | -    |
| 13504 | 1433728_at   | Region | BC038479          | 244757 | 9    | 26656943  | 26700320  | -    |
| 13505 | 1424582_at   | Region | Mulk              | 69923  | 6    | 40467075  | 40538342  | +    |
| 13506 | 1437741_at   | Region | Rab21             | 216344 | 10   | 114975874 | 115001563 | -    |
| 13507 | 1440953_at   | Region | 1700096K18Rik     | 73571  | 5    | 24000313  | 24000831  | +    |
| 13508 | 1450782_at   | Region | Wnt4              | 22417  | 4    | 136158896 | 136178040 | +    |
| 13509 | 1437150_at   | Region | 1700012H17Rik     | 242297 | 4    | 5571325   | 5727090   | +    |
| 13510 | 1452761_a_at | Region | 8430436O14Rik     | 71506  | 9    | 116559671 | 116560865 | -    |
| 13511 | 1418587_at   | Region | Traf3             | 22031  | 12   | 106693201 | 106740539 | +    |
| 13512 | 1437540_at   | Region | None              | None   | 3    | 145117384 | 145118278 | +    |
| 13513 | 1459826_at   | Region | None              | None   | 2    | 180795357 | 180795586 | -    |
| 13514 | 1426413_at   | Region | Neurod1           | 18012  | 2    | 79150390  | 79154385  | -    |

|       |              |        |               |        |      |           |           |      |
|-------|--------------|--------|---------------|--------|------|-----------|-----------|------|
| 13515 | 1446492_at   | Region | C630028F04Rik | 243274 | 5    | 126949997 | 127603737 | -    |
| 13516 | 1455614_at   | Region | Nr1i3         | 12355  | 1    | 171142875 | 171147683 | +    |
| 13517 | 1435398_at   | Region | Stxbp5        | 78808  | 10   | 9633720   | 9718785   | -    |
| 13518 | 1433907_at   | Region | None          | None   | 9    | 36829898  | 36831652  | -    |
| 13519 | 1416412_at   | Region | Nsmaf         | 18201  | 4    | 6323372   | 6381407   | -    |
| 13520 | 1439248_at   | Region | 4932432N11Rik | 74386  | 13   | 57034424  | 57043384  | +    |
| 13521 | 1437980_at   | Region | 9130230N09Rik | 77671  | 11   | 22755630  | 22756054  | +    |
| 13522 | 1433789_at   | Region | Rnu17d        | 399101 | 4    | 131312832 | 131313595 | -    |
| 13523 | 1435799_at   | Region | Sfrs14        | 234373 | 8    | 69387208  | 69416080  | +    |
| 13524 | 1447738_s_at | Region | Ankrd13d      | 68423  | 19   | 4058970   | 4071838   | -    |
| 13525 | 1455676_x_at | Region | Tial1         | 21843  | 7    | 122491640 | 122510627 | -    |
| 13526 | 1445415_at   | Region | B230303A05    | 328191 | 13   | 15394036  | 15472574  | -    |
| 13527 | 1438165_x_at | Region | Vat1          | 26949  | 11   | 101279835 | 101287286 | -    |
| 13528 | 1435133_at   | Region | Ugcg          | 22234  | 4    | 59132999  | 59166282  | +    |
| 13529 | 1449977_at   | Region | Egr4          | 13656  | 6    | 85861038  | 85863458  | -    |
| 13530 | 1418260_at   | Region | Hunk          | 26559  | 16   | 89543829  | 89656985  | +    |
| 13531 | 1423927_at   | Region | Slc35b2       | 73836  | 17   | 43074866  | 43078599  | +    |
| 13532 | 1436540_at   | Region | D10Bwg1379e   | 215821 | 10   | 18490148  | 18668026  | -    |
| 13533 | 1428522_at   | Region | Ttf2          | 74044  | 3    | 100364769 | 100395573 | -    |
| 13534 | 1434820_s_at | Region | Pkig          | 18769  | 2    | 163150999 | 163183121 | +    |
| 13535 | 1441082_at   | Region | None          | None   | 16   | 96074548  | 96074932  | -    |
| 13536 | 1436104_a_at | Region | 2310015A05Rik | 72315  | 16   | 16417438  | 16421706  | +    |
| 13537 | 1437875_at   | Region | None          | None   | 13   | 48984687  | 48986539  | +    |
| 13538 | 1446326_at   | Region | Col1a2        | 12843  | 6    | 4458646   | 4493615   | +    |
| 13539 | 1430713_s_at | Region | Ndufa13       | 67184  | 8    | 69045459  | 69053837  | -    |
| 13540 | 1416230_at   | Region | Rfk           | 54391  | 19   | 16618183  | 16625435  | +    |
| 13541 | 1442019_at   | Region | B230343A10Rik | 320013 | 11   | 67412753  | 67413382  | -    |
| 13542 | 1420514_at   | Region | Tmem47        | 192216 | X    | 75731366  | 75757118  | +    |
| 13543 | 1454862_at   | Region | Phldb2        | 208177 | 16   | 44630808  | 44728527  | -    |
| 13544 | 1458378_at   | Region | Grin3a        | 242443 | 4    | 49579958  | 49588490  | -    |
| 13545 | 1436339_at   | Region | 1810058I24Rik | 67705  | 6    | 35346812  | 35356014  | +    |
| 13546 | 1420891_at   | Region | Wnt7b         | 22422  | 15   | 85584040  | 85630181  | -    |
| 13547 | 1419108_at   | Region | Ophn1         | 94190  | X    | 93158876  | 93492346  | -    |
| 13548 | 1426362_at   | Region | 5730537D05Rik | 70652  | 3    | 79543274  | 79572782  | -    |
|       |              |        | Rps2 ///      |        |      |           |           |      |
|       |              |        | LOC432878 /// |        |      |           |           |      |
|       |              |        | LOC434347 /// |        |      |           |           |      |
|       |              |        | LOC544872 /// |        |      |           |           |      |
|       |              |        | LOC545808 /// |        |      |           |           |      |
|       |              |        | LOC546164 /// |        |      |           |           |      |
| 13549 | 1422156_a_at | Region | LOC546298     | 16898  | 17   | 22525236  | 22527051  | +    |
| 13550 | 1423350_at   | Region | Socs5         | 56468  | 17   | 84964483  | 84994389  | +    |
| 13551 | 1458135_at   | Region | None          | None   | X    | 65806702  | 65807363  | +    |
| 13552 | 1451537_at   | Region | Chi3l1        | 12654  | 1    | 134032745 | 134040294 | +    |
| 13553 | 1417874_at   | Region | 2310004K06Rik | 56786  | 7    | 103588707 | 103605134 | -    |
| 13554 | 1424601_at   | Region | Xrcc4         | 108138 | 13   | 85965021  | 86189500  | -    |
| 13555 | 1454906_at   | Region | Rarb          | 218772 | 14   | 14927459  | 15071124  | -    |
| 13556 | 1446206_at   | Region | B230209C24Rik | 320705 | 1    | 34121165  | 34176734  | -    |
| 13557 | 1440133_x_at | Region | Prkar1b       | 19085  | 5    | 138015364 | 138127749 | -    |
| 13558 | 1422725_at   | Region | Mak           | 17152  | 13   | 40586903  | 40631049  | -    |
| 13559 | 1424790_at   | Region | 2900084M01Rik | 73095  | 8    | 69337315  | 69347211  | -    |
| 13560 | 1417399_at   | Region | Gas6          | 14456  | 8    | 12844009  | 12873141  | -    |
| 13561 | 1426725_s_at | Region | Ets1          | 23871  | 9    | 32617946  | 32676163  | +    |
| 13562 | 1448543_at   | Region | 2310042G06Rik | 66390  | 2    | 173889998 | 173897848 | -    |
| 13563 | 1460394_a_at | Region | Inpp1         | 16332  | 7    | 95928562  | 95944145  | -    |
|       |              |        | Rpl12 ///     |        |      |           |           |      |
|       |              |        | LOC385403 /// |        |      |           |           |      |
|       |              |        | LOC432518 /// |        |      |           |           |      |
| 13564 | 1435655_at   | Region | LOC436225     | 269261 | 2    | 32893888  | 32896203  | +    |
| 13565 | 1439093_at   | Region | 4921509J17Rik | 70857  | NONE | NONE      | NONE      | NONE |
| 13566 | 1456440_s_at | Region | None          | None   | 2    | 13567269  | 13568387  | -    |
| 13567 | 1452923_at   | Region | 1810058I14Rik | 75597  | 13   | 104279275 | 104385298 | -    |
| 13568 | 1427293_a_at | Region | Auts2         | 319974 | 5    | 130627794 | 130728707 | -    |
| 13569 | 1439321_at   | Region | Arid1b        | 239985 | 17   | 4902975   | 5250462   | +    |
| 13570 | 1426373_at   | Region | Ski           | 20481  | 4    | 153649703 | 153714882 | -    |





|       |              |        |               |        |    |           |           |   |
|-------|--------------|--------|---------------|--------|----|-----------|-----------|---|
| 13636 | 1416555_at   | Region | Ei24          | 13663  | 9  | 36716320  | 36734233  | - |
| 13637 | 1436778_at   | Region | Cybb          | 13058  | X  | 7675646   | 7708207   | - |
| 13638 | 1416910_at   | Region | Dnajd1        | 66148  | 14 | 72168649  | 72217349  | - |
| 13639 | 1433770_at   | Region | Dpysl2        | 12934  | 14 | 61332083  | 61398082  | - |
| 13640 | 1433502_s_at | Region | AW550801      | 104662 | 11 | 74623765  | 74634998  | + |
| 13641 | 1416967_at   | Region | Sox2          | 20674  | 3  | 34105755  | 34108159  | + |
| 13642 | 1443466_s_at | Region | Polr3b        | 70428  | 10 | 84517097  | 84621838  | + |
| 13643 | 1423783_at   | Region | Tor2a         | 30933  | 2  | 32689433  | 32694406  | + |
| 13644 | 1437463_x_at | Region | Tgfb1         | 21810  | 13 | 55229952  | 55259688  | + |
| 13645 | 1425887_at   | Region | 4930511J11Rik | 74720  | 16 | 8082569   | 8098429   | - |
| 13646 | 1451326_at   | Region | 1810013B01Rik | 76491  | 9  | 106443674 | 106516765 | + |
| 13647 | 1425369_a_at | Region | Sox10         | 20665  | 15 | 79206217  | 79275996  | - |
| 13648 | 1418310_a_at | Region | Rlbp1         | 19771  | 7  | 73172072  | 73181986  | - |
| 13649 | 1421045_at   | Region | Mrc2          | 17534  | 11 | 105113772 | 105171058 | + |
| 13650 | 1428827_at   | Region | Whsc1         | 107823 | 5  | 32352922  | 32384263  | + |
| 13651 | 1416592_at   | Region | Glrx1         | 93692  | 13 | 71896546  | 71906783  | + |
| 13652 | 1426644_at   | Region | Tbc1d20       | 67231  | 2  | 151750808 | 151769526 | + |
| 13653 | 1451992_at   | Region | Adrbk1        | 110355 | 19 | 4074791   | 4094745   | - |
| 13654 | 1452918_at   | Region | D19ErtD737e   | 76539  | 19 | 59801013  | 59829124  | - |
| 13655 | 1424231_s_at | Region | Sec15l1       | 107371 | 19 | 36893738  | 37026525  | + |
| 13656 | 1448642_at   | Region | Pcbp1         | 23983  | 6  | 86959261  | 86960934  | - |
| 13657 | 1452393_at   | Region | Al597013      | 100182 | 4  | 62458296  | 62471256  | - |
| 13658 | 1455169_at   | Region | Rab11fip2     | 74998  | 19 | 59505244  | 59508287  | - |
| 13659 | 1433847_at   | Region | D330017J20Rik | 320609 | 6  | 30005780  | 30006779  | + |
| 13660 | 1426991_at   | Region | 1810048J11Rik | 67708  | 12 | 69380024  | 69386367  | + |
| 13661 | 1438291_x_at | Region | None          | None   | 5  | 66219796  | 66219942  | + |
| 13662 | 1439634_at   | Region | 4930505D03Rik | 74694  | 10 | 120920073 | 120967773 | - |
| 13663 | 1435052_at   | Region | 4930455F23Rik | 74895  | 1  | 164194019 | 164206339 | + |
| 13664 | 1439569_at   | Region | Gpr83         | 14608  | 9  | 14693694  | 14702939  | + |
| 13665 | 1435634_at   | Region | A030012M09Rik | 319263 | 1  | 7090301   | 7142844   | + |
| 13666 | 1448996_at   | Region | Rom1          | 19881  | 19 | 8123939   | 8125735   | - |
| 13667 | 1456829_at   | Region | Pnma3         | 245468 | X  | 67725442  | 67728846  | + |
| 13668 | 1451199_at   | Region | Qtrtd1        | 106248 | 16 | 42734124  | 42762404  | - |
| 13669 | 1425136_x_at | Region | Dnm2          | 13430  | 9  | 21313566  | 21396180  | + |
| 13670 | 1450642_at   | Region | 3110001I20Rik | 70354  | 2  | 125250846 | 125296723 | - |
| 13671 | 1440083_at   | Region | A430061O12Rik | 319285 | 4  | 136217733 | 136218104 | - |
| 13672 | 1426861_at   | Region | 9130023F12Rik | 216549 | 11 | 20579877  | 20636277  | - |
| 13673 | 1415717_at   | Region | 4931406I20Rik | 66743  | 4  | 116230369 | 116455820 | - |
| 13674 | 1456946_at   | Region | 4831416G18Rik | 237353 | 10 | 58942240  | 59096717  | + |
| 13675 | 1457310_x_at | Region | LOC545474     | 545474 | 2  | 151550295 | 151552735 | + |
| 13676 | 1439481_at   | Region | Ipo9          | 226432 | 1  | 135234946 | 135287679 | - |
| 13677 | 1460676_at   | Region | 1300006C06Rik | 74158  | 15 | 79726573  | 79740139  | - |
| 13678 | 1420670_at   | Region | Arnt2         | 11864  | 7  | 78100192  | 78263873  | - |
| 13679 | 1438019_at   | Region | 1810043M15Rik | 75678  | 13 | 49020824  | 49062503  | + |
| 13680 | 1441866_s_at | Region | Ptdss1        | 19210  | 13 | 63535264  | 63600822  | + |
| 13681 | 1418736_at   | Region | B3galt3       | 26879  | 3  | 69244708  | 69269383  | - |
| 13682 | 1439643_at   | Region | Orc4l         | 26428  | 2  | 48835014  | 48881396  | - |
| 13683 | 1424394_at   | Region | MGI:2149786   | 114679 | 11 | 3409673   | 3412137   | + |
| 13684 | 1460393_a_at | Region | Dusp7         | 235584 | 9  | 106362584 | 106369022 | + |
| 13685 | 1426878_at   | Region | 2610016F04Rik | 66923  | 14 | 29151150  | 29207125  | + |
| 13686 | 1416877_a_at | Region | Mrpl51        | 66493  | 6  | 125848878 | 125851070 | + |
| 13687 | 1415731_at   | Region | D1ErtD396e    | 52477  | 1  | 190665121 | 190682759 | + |
| 13688 | 1424386_at   | Region | BC020184      | 225362 | 18 | 35064316  | 35071113  | + |
| 13689 | 1456482_at   | Region | Pik3r3        | 18710  | 4  | 115180819 | 115261961 | + |
| 13690 | 1426307_at   | Region | Ncb5or        | 266690 | 9  | 87375157  | 87425198  | + |
| 13691 | 1416325_at   | Region | Crisp1        | 11571  | 17 | 37800390  | 37825831  | - |
| 13692 | 1460010_a_at | Region | Ptdss2        | 27388  | 7  | 135533273 | 135558141 | + |
| 13693 | 1416612_at   | Region | Cyp1b1        | 13078  | 17 | 77524347  | 77532435  | - |
| 13694 | 1423236_at   | Region | Galnt1        | 14423  | 18 | 24433937  | 24514141  | + |
| 13695 | 1437073_x_at | Region | AV025504      | 105633 | 14 | 70102611  | 70102960  | - |
| 13696 | 1429783_at   | Region | Pdlim5        | 56376  | 3  | 141211634 | 141364594 | - |
| 13697 | 1452757_s_at | Region | Hba-a1        | 15122  | 11 | 32178468  | 32179287  | + |
| 13698 | 1418953_at   | Region | Fbxo16        | 50759  | 14 | 59793581  | 59848382  | + |
| 13699 | 1438401_at   | Region | Ubn1          | 170644 | 16 | 4719862   | 4734397   | + |
| 13700 | 1416966_at   | Region | Slc22a8       | 19879  | 19 | 7787836   | 7808381   | + |

|       |              |        |               |        |    |           |           |   |
|-------|--------------|--------|---------------|--------|----|-----------|-----------|---|
| 13701 | 1454933_at   | Region | 2610027C15Rik | 230752 | 4  | 125175116 | 125176987 | + |
| 13702 | 1453312_at   | Region | lqwd1         | 74106  | 1  | 165251609 | 165382346 | - |
| 13703 | 1416804_at   | Region | LOC114601     | 114601 | 19 | 5496839   | 5515060   | - |
| 13704 | 1439980_at   | Region | D14ErtD725e   | 52524  | 14 | 19966948  | 19968133  | + |
| 13705 | 1440895_at   | Region | None          | None   | 4  | 98095988  | 98096867  | + |
| 13706 | 1419411_at   | Region | Tac2          | 21334  | 10 | 127461188 | 127468477 | + |
| 13707 | 1455195_at   | Region | Rps24         | 20088  | 14 | 22859652  | 22865117  | + |
| 13708 | 1442983_at   | Region | Slc23a2       | 54338  | 2  | 131566349 | 131658961 | - |
| 13709 | 1438318_x_at | Region | 1500001L15Rik | 68966  | 14 | 49532485  | 49541105  | + |
| 13710 | 1419070_at   | Region | Cys1          | 12879  | 12 | 21215593  | 21231550  | - |
| 13711 | 1443167_at   | Region | Rnf12         | 19820  | X  | 98558532  | 98582649  | - |
| 13712 | 1426566_s_at | Region | Il17re        | 57890  | 6  | 114026314 | 114038581 | + |
| 13713 | 1456962_at   | Region | Cntn2         | 21367  | 1  | 132366699 | 132400216 | - |
| 13714 | 1454980_at   | Region | 4930402E16Rik | 319518 | 8  | 110392463 | 110432862 | + |
| 13715 | 1428998_at   | Region | Phf3          | 213109 | 1  | 31075361  | 31146157  | - |
| 13716 | 1451283_at   | Region | 1810073G14Rik | 67726  | 11 | 57208629  | 57244244  | - |
| 13717 | 1433806_x_at | Region | Calr          | 12317  | 8  | 84108911  | 84113928  | - |
| 13718 | 1425835_a_at | Region | Bbx           | 70508  | 16 | 49039981  | 49275616  | - |
| 13719 | 1429440_at   | Region | 1810041L15Rik | 72301  | 15 | 84428627  | 84495696  | - |
| 13720 | 1439389_s_at | Region | Myadm         | 50918  | 7  | 4169      | 12984     | - |
| 13721 | 1434966_at   | Region | Sfrs8         | 231769 | 5  | 128676882 | 128691989 | + |
| 13722 | 1423460_at   | Region | Perq1         | 57330  | 5  | 136470004 | 136476570 | + |
| 13723 | 1421479_at   | Region | Zfp318        | 57908  | 17 | 43894944  | 43929210  | + |
| 13724 | 1448873_at   | Region | Ocln          | 18260  | 13 | 96649598  | 96704908  | - |
| 13725 | 1419399_at   | Region | Mttp          | 17777  | 3  | 136979815 | 137020253 | - |
| 13726 | 1420840_at   | Region | Plekha3       | 83435  | 2  | 76373044  | 76394322  | + |
| 13727 | 1457390_at   | Region | Prpf3         | 70767  | 3  | 95318454  | 95343585  | - |
| 13728 | 1417833_at   | Region | Zc3h10        | 103284 | 10 | 128280653 | 128284834 | - |
| 13729 | 1452141_a_at | Region | Sepp1         | 20363  | 15 | 3051735   | 3061247   | + |
| 13730 | 1415692_s_at | Region | Canx          | 12330  | 11 | 50047308  | 50078432  | - |
| 13731 | 1456401_at   | Region | Cacnb2        | 12296  | 2  | 14530578  | 14913205  | + |
| 13732 | 1437938_x_at | Region | Dnm2          | 13430  | 9  | 21313566  | 21396180  | + |
| 13733 | 1434765_at   | Region | Ep300         | 328572 | 15 | 81636928  | 81702791  | + |
| 13734 | 1458269_at   | Region | Pcdh9         | 211712 | 14 | 88351670  | 88356571  | - |
| 13735 | 1460295_s_at | Region | Il6st         | 16195  | 13 | 108856634 | 108899366 | + |
| 13736 | 1421077_at   | Region | Sertad3       | 170742 | 7  | 22849842  | 22853366  | + |
| 13737 | 1453956_a_at | Region | Pftk1         | 18647  | 5  | 4809738   | 5386208   | - |
| 13738 | 1455610_at   | Region | Dmn           | 233335 | 7  | 61614971  | 61644496  | - |
| 13739 | 1428788_at   | Region | 1700012G19Rik | 67078  | 17 | 22274058  | 22275187  | + |
| 13740 | 1451906_at   | Region | Ubx3          | 212190 | 4  | 137599799 | 137618428 | - |
| 13741 | 1423128_at   | Region | Aip           | 11632  | 19 | 3903236   | 3914617   | - |
| 13742 | 1439220_at   | Region | Ank3          | 11735  | 10 | 69589190  | 70079102  | + |
| 13743 | 1433504_at   | Region | Pygb          | 110078 | 2  | 150243732 | 150288684 | + |
| 13744 | 1428781_at   | Region | 1110014F24Rik | 73712  | 7  | 26172733  | 26205221  | + |
| 13745 | 1438739_at   | Region | Cnbp1         | 12785  | 6  | 88279741  | 88287657  | - |
| 13746 | 1440372_at   | Region | Arfrp2        | 218639 | 13 | 110208602 | 110571472 | + |
| 13747 | 1424850_at   | Region | Map3k1        | 26401  | 13 | 108136840 | 108199233 | - |
| 13748 | 1455715_at   | Region | None          | None   | 17 | 92809459  | 92809967  | + |
| 13749 | 1433981_s_at | Region | Htatip        | 81601  | 19 | 5392208   | 5398819   | - |
| 13750 | 1425950_at   | Region | BC019537      | 228993 | 2  | 180442337 | 180451134 | + |
| 13751 | 1426674_at   | Region | Eif3s9        | 27979  | 5  | 139415645 | 139439698 | + |
| 13752 | 1435322_at   | Region | 1110011C06Rik | 68494  | 11 | 94155722  | 94162935  | + |
| 13753 | 1419211_s_at | Region | 4933424B01Rik | 71177  | 6  | 147470322 | 147498449 | - |
| 13754 | 1437105_at   | Region | Jarid1a       | 214899 | 6  | 120796139 | 120871561 | + |
| 13755 | 1416572_at   | Region | Mmp14         | 17387  | 14 | 48948545  | 48958231  | + |
| 13756 | 1420915_at   | Region | Stat1         | 20846  | 1  | 52420399  | 52461905  | + |
| 13757 | 1438882_at   | Region | Arhgap18      | 73910  | 10 | 26772308  | 26918428  | + |
| 13758 | 1423076_at   | Region | Snx9          | 66616  | 17 | 5750779   | 5837658   | + |
| 13759 | 1436398_at   | Region | Lef1          | 16842  | 3  | 130040399 | 130153310 | + |
| 13760 | 1452988_at   | Region | Aak1          | 269774 | 6  | 87282212  | 87283599  | - |
| 13761 | 1434510_at   | Region | Papss2        | 23972  | 19 | 31944210  | 31991770  | + |
| 13762 | 1444112_at   | Region | None          | None   | 3  | 89148860  | 89154952  | + |
| 13763 | 1444578_at   | Region | Spop          | 20747  | 11 | 95235201  | 95314100  | + |
| 13764 | 1436632_at   | Region | D130059P03Rik | 320538 | 6  | 38570159  | 38638809  | + |
| 13765 | 1456172_at   | Region | Txndc5        | 105245 | 13 | 38041006  | 38069191  | - |

|       |              |        |               |        |    |           |           |   |
|-------|--------------|--------|---------------|--------|----|-----------|-----------|---|
| 13766 | 1424043_at   | Region | Ppil4         | 67418  | 10 | 7658399   | 7688620   | + |
| 13767 | 1416436_a_at | Region | 2410003P15Rik | 56046  | 2  | 155303838 | 155386985 | - |
| 13768 | 1423187_at   | Region | Gabarapl2     | 93739  | 8  | 111238426 | 111253086 | + |
| 13769 | 1423818_a_at | Region | Arl6ip1       | 54208  | 7  | 111994757 | 112005420 | - |
| 13770 | 1423741_at   | Region | Rbm10         | 236732 | X  | 18858936  | 18889829  | + |
| 13771 | 1460428_at   | Region | 1100001D10Rik | 68420  | 5  | 113884556 | 113915448 | + |
| 13772 | 1429077_x_at | Region | Rpl21         | 19933  | 5  | 145724838 | 145728723 | + |
| 13773 | 1452359_at   | Region | AA536743      | 100532 | 5  | 62707529  | 62766865  | - |
| 13774 | 1457566_at   | Region | A830058L05Rik | 210503 | 17 | 19253175  | 19268702  | + |
| 13775 | 1427231_at   | Region | Robo1         | 19876  | 16 | 71741946  | 72126752  | + |
| 13776 | 1418175_at   | Region | Vdr           | 22337  | 15 | 97930914  | 97984749  | - |
| 13777 | 1429821_at   | Region | 2810046L04Rik | 212127 | 3  | 53098037  | 53115975  | + |
| 13778 | 1448230_at   | Region | Usp10         | 22224  | 8  | 119267518 | 119314223 | + |
| 13779 | 1435912_at   | Region | Al196514      | 224111 | 16 | 31136065  | 31196127  | + |
| 13780 | 1423700_at   | Region | Rfc3          | 69263  | 5  | 120       | 8093      | + |
| 13781 | 1438894_at   | Region | None          | None   | 13 | 28173624  | 28174273  | - |
| 13782 | 1418169_at   | Region | Zcchc14       | 142682 | 8  | 120981449 | 121033085 | - |
| 13783 | 1418698_a_at | Region | Fech          | 14151  | 18 | 64689244  | 64721633  | - |
| 13784 | 1452515_a_at | Region | Xylt2         | 217119 | 11 | 94484938  | 94491627  | - |
| 13785 | 1417360_at   | Region | Mlh1          | 17350  | 9  | 111269552 | 111312859 | - |
| 13786 | 1456336_at   | Region | A330102K23Rik | 77771  | 2  | 65701242  | 65878859  | + |
| 13787 | 1420554_a_at | Region | Rac3          | 170758 | 11 | 120542561 | 120545062 | + |
| 13788 | 1459639_at   | Region | Brsk2         | 75770  | 7  | 136362546 | 136417039 | + |
| 13789 | 1448322_a_at | Region | Cox4i1        | 12857  | 8  | 120025652 | 120031553 | + |
| 13790 | 1428649_at   | Region | Cand1         | 71902  | 10 | 118778384 | 118938138 | - |
| 13791 | 1436075_at   | Region | Sfrp5         | 54612  | 19 | 41742303  | 41746463  | - |
| 13792 | 1431038_at   | Region | Rassf4        | 213391 | 6  | 117070312 | 117109861 | - |
| 13793 | 1451692_at   | Region | 2410015B03Rik | 71983  | 18 | 36958833  | 36966162  | + |
| 13794 | 1416703_at   | Region | Mapk14        | 26416  | 17 | 26492551  | 26549631  | + |
| 13795 | 1452335_at   | Region | 2810423E13Rik | 72175  | 3  | 40237869  | 40269375  | - |
| 13796 | 1456544_at   | Region | Tmem38b       | 52076  | 4  | 53741941  | 53776470  | + |
| 13797 | 1423875_at   | Region | Al450540      | 226252 | 19 | 56946405  | 56975311  | + |
| 13798 | 1424347_at   | Region | Ppp6c         | 67857  | 2  | 39128960  | 39158501  | + |
| 13799 | 1416978_at   | Region | Fcgr2         | 14132  | 7  | 39169606  | 39179634  | - |
| 13800 | 1430652_at   | Region | 9030612E09Rik | 74530  | 10 | 43281064  | 43282922  | + |
| 13801 | 1434835_at   | Region | BC037674      | 218914 | 14 | 32808636  | 32880366  | + |
| 13802 | 1417371_at   | Region | Peli1         | 67245  | 11 | 21030262  | 21045116  | + |
| 13803 | 1434385_at   | Region | Tom1l2        | 216810 | 11 | 59955659  | 60078526  | - |
| 13804 | 1456542_s_at | Region | Qrs1          | 76563  | 10 | 43983931  | 44011492  | - |
| 13805 | 1417618_at   | Region | Itih2         | 16425  | 2  | 10010705  | 10046778  | - |
| 13806 | 1452149_at   | Region | Ube3b         | 117146 | 5  | 113501027 | 113531732 | + |
| 13807 | 1418253_a_at | Region | Hspa4l        | 18415  | 3  | 40165310  | 40210062  | + |
| 13808 | 1448130_at   | Region | Fdft1         | 14137  | 14 | 57675741  | 57708384  | - |
| 13809 | 1449095_at   | Region | Vps54         | 245944 | 11 | 21134074  | 21215926  | + |
| 13810 | 1429133_at   | Region | 4930519N16Rik | 75124  | 13 | 15736     | 19903     | - |
| 13811 | 1415937_s_at | Region | Pdcd6ip       | 18571  | 9  | 113708127 | 113760882 | - |
| 13812 | 1455435_s_at | Region | None          | None   | 14 | 28173232  | 28174329  | + |
| 13813 | 1433827_at   | Region | Atp8a1        | 11980  | 5  | 66388740  | 66614923  | - |
| 13814 | 1451109_a_at | Region | Nedd4         | 17999  | 9  | 72794997  | 72882331  | + |
| 13815 | 1446844_at   | Region | Chchd7        | 66433  | 4  | 3866060   | 3870669   | + |
| 13816 | 1448803_at   | Region | Golga4        | 54214  | 9  | 118500315 | 118578377 | + |
| 13817 | 1442557_at   | Region | Syt1          | 20979  | 10 | 108385089 | 108577499 | - |
| 13818 | 1429054_at   | Region | Mrpl47        | 74600  | 3  | 32135718  | 32144954  | - |
| 13819 | 1443117_at   | Region | Eya1          | 14048  | 1  | 14348042  | 14481971  | - |
| 13820 | 1415939_at   | Region | Fmod          | 14264  | 1  | 133888996 | 133898985 | + |
| 13821 | 1417250_at   | Region | Rnf12         | 19820  | X  | 98558532  | 98582649  | - |
| 13822 | 1426893_at   | Region | C230093N12Rik | 98952  | 2  | 32467521  | 32501912  | + |
|       |              |        | Sumo2 ///     |        |    |           |           |   |
| 13823 | 1415781_a_at | Region | LOC236622     | 170930 | 11 | 115344202 | 115357323 | - |
| 13824 | 1430614_at   | Region | 4632415K11Rik | 74347  | 8  | 119114536 | 119133850 | - |
| 13825 | 1437103_at   | Region | C330012H03Rik | 319765 | 16 | 20832300  | 20935863  | - |
| 13826 | 1437989_at   | Region | Pde8b         | 218461 | 13 | 91208631  | 91434426  | - |
| 13827 | 1427152_at   | Region | 4732486L23Rik | 99003  | 2  | 104462387 | 104521514 | - |
| 13828 | 1428795_at   | Region | 1110021L09Rik | 76306  | 10 | 23801094  | 23802894  | + |
| 13829 | 1452747_at   | Region | Atp13a2       | 74772  | 4  | 139868189 | 139888591 | + |

|       |              |        |               |        |      |           |           |      |
|-------|--------------|--------|---------------|--------|------|-----------|-----------|------|
| 13830 | 1423956_at   | Region | Smapp1        | 98366  | 1    | 24090771  | 24166945  | -    |
| 13831 | 1428369_s_at | Region | Arhgap21      | 71435  | 2    | 20889950  | 21009731  | -    |
| 13832 | 1416797_at   | Region | Nck2          | 17974  | 1    | 43740468  | 43865231  | +    |
| 13833 | 1435011_x_at | Region | Akr1a4        | 58810  | 4    | 115595415 | 115610556 | -    |
| 13834 | 1440317_at   | Region | C130068B02Rik | 402752 | 17   | 27974213  | 27974705  | +    |
| 13835 | 1423171_at   | Region | Gpr88         | 64378  | 3    | 115019299 | 115023427 | -    |
| 13836 | 1430326_s_at | Region | 1500040F11Rik | 22272  | 11   | 53180763  | 53183655  | -    |
| 13837 | 1455555_at   | Region | AV071699      | 102723 | 9    | 121684531 | 121685430 | +    |
| 13838 | 1429639_at   | Region | 2310032D16Rik | 74182  | 2    | 132043251 | 132092031 | -    |
| 13839 | 1428817_at   | Region | 2610528O22Rik | 67074  | 10   | 122685914 | 122766593 | -    |
| 13840 | 1436899_at   | Region | 2700019D07Rik | 72580  | 10   | 33986876  | 34011152  | -    |
| 13841 | 1420864_at   | Region | Zfp161        | 22666  | 17   | 67159059  | 67165625  | +    |
| 13842 | 1448440_x_at | Region | D17Wsu104e    | 28106  | 17   | 53813582  | 53820961  | -    |
| 13843 | 1434387_at   | Region | AI429612      | 106581 | 17   | 24005883  | 24037311  | -    |
| 13844 | 1437339_s_at | Region | Pcsk5         | 18552  | 19   | 16656932  | 17062422  | -    |
| 13845 | 1446583_at   | Region | None          | None   | NONE | NONE      | NONE      | NONE |
| 13846 | 1438371_x_at | Region | Ddx5          | 13207  | 11   | 106602635 | 106609565 | -    |
| 13847 | 1421520_at   | Region | Jph1          | 57339  | 1    | 17181923  | 17282257  | -    |
| 13848 | 1426574_a_at | Region | Add3          | 27360  | 19   | 52767533  | 52814957  | +    |
| 13849 | 1435406_at   | Region | Cchcr1        | 240084 | 17   | 33234535  | 33248617  | +    |
| 13850 | 1445534_at   | Region | Flnb          | 286940 | 14   | 5564611   | 5619816   | +    |
| 13851 | 1454967_at   | Region | A930001N09Rik | 77128  | 17   | 24510472  | 24568084  | +    |
| 13852 | 1428449_at   | Region | Gtf3c2        | 71752  | 5    | 29615739  | 29638859  | -    |
| 13853 | 1441359_at   | Region | 9230115F04Rik | 320841 | 4    | 107497810 | 107498665 | +    |
| 13854 | 1417211_a_at | Region | 1110032A03Rik | 68721  | 9    | 50835154  | 50840478  | -    |
| 13855 | 1416319_at   | Region | Adk           | 11534  | 14   | 19417295  | 19813215  | +    |
| 13856 | 1434796_at   | Region | Vamp4         | 53330  | 1    | 162480609 | 162508875 | +    |
| 13857 | 1431491_at   | Region | 9430087N24Rik | 77440  | 15   | 43679380  | 43680585  | -    |
| 13858 | 1418512_at   | Region | Stk3          | 56274  | 15   | 34876656  | 35155734  | -    |
| 13859 | 1443858_at   | Region | None          | None   | 7    | 98451112  | 98452137  | -    |
| 13860 | 1416248_at   | Region | Nadk          | 192185 | 4    | 154054766 | 154083359 | +    |
| 13861 | 1417308_at   | Region | Pkm2          | 18746  | 9    | 59773488  | 59796255  | +    |
| 13862 | 1460296_a_at | Region | Fgf22         | 67112  | 10   | 79877743  | 79879585  | +    |
| 13863 | 1415916_a_at | Region | Mthfd1        | 108156 | 12   | 73111496  | 731175891 | +    |
| 13864 | 1423671_at   | Region | Dner          | 227325 | 1    | 84703796  | 85030178  | -    |
| 13865 | 1425622_at   | Region | Edil3         | 13612  | 13   | 84938267  | 85437638  | +    |
| 13866 | 1433891_at   | Region | Gpr48         | 107515 | 2    | 109541897 | 109638012 | +    |
| 13867 | 1436167_at   | Region | LOC435684     | 435684 | 2    | 121862745 | 121882715 | -    |
| 13868 | 1451989_a_at | Region | Mapre2        | 212307 | 18   | 24032480  | 24122349  | +    |
| 13869 | 1417708_at   | Region | Syt3          | 20981  | 7    | 38460249  | 38475359  | +    |
| 13870 | 1444245_at   | Region | B230118H07Rik | 68170  | 2    | 101265464 | 101333669 | -    |
| 13871 | 1424236_at   | Region | Tbc1d10b      | 68449  | 7    | 121247196 | 121258199 | -    |
| 13872 | 1450421_at   | Region | Tgfa          | 21802  | 6    | 86626355  | 86707058  | +    |
| 13873 | 1454822_x_at | Region | Apcdd1        | 494504 | 18   | 63040206  | 63182348  | +    |
| 13874 | 1459133_at   | Region | 2310050N11Rik | 66967  | 1    | 151613030 | 151679348 | +    |
| 13875 | 1416500_at   | Region | Sacm1l        | 83493  | 9    | 123553586 | 123616302 | +    |
| 13876 | 1427903_at   | Region | Phpt1         | 75454  | 2    | 25505593  | 25507033  | -    |
| 13877 | 1425235_s_at | Region | Col20a1       | 73368  | 2    | 180703493 | 180734498 | +    |
| 13878 | 1445393_at   | Region | Slc24a2       | 76376  | 4    | 85975964  | 86216615  | -    |
| 13879 | 1416620_at   | Region | Smarcal1      | 54380  | 1    | 72884934  | 72934797  | +    |
| 13880 | 1435068_at   | Region | Pip5k2b       | 108083 | 11   | 97536244  | 97565791  | -    |
| 13881 | 1437927_at   | Region | Dlgh2         | 23859  | 7    | 85860491  | 86494465  | +    |
| 13882 | 1452737_at   | Region | 2810008M24Rik | 75616  | 13   | 104271134 | 104275859 | +    |
| 13883 | 1416515_at   | Region | Fscn1         | 14086  | 5    | 142024679 | 142037166 | +    |
| 13884 | 1440207_at   | Region | AI505034      | 99010  | 2    | 111863079 | 111870349 | +    |
| 13885 | 1451603_at   | Region | A330096I21Rik | 234542 | 8    | 84215010  | 84224777  | +    |
| 13886 | 1452112_a_at | Region | 4921506I22Rik | 66704  | 19   | 4545410   | 4554730   | +    |
| 13887 | 1446371_at   | Region | Rab18         | 19330  | 18   | 60692     | 85718     | -    |
| 13888 | 1450718_at   | Region | MGI:1345171   | 23921  | 5    | 135231641 | 135258395 | -    |
| 13889 | 1455746_at   | Region | Kif13a        | 16553  | 13   | 46347970  | 46527871  | -    |
| 13890 | 1426836_s_at | Region | Metap1        | 75624  | 3    | 137348195 | 137378617 | -    |
| 13891 | 1435603_at   | Region | Sned1         | 208777 | 1    | 93063332  | 93128556  | +    |
| 13892 | 1438966_x_at | Region | Fmod          | 14264  | 1    | 133888996 | 133898985 | +    |
| 13893 | 1438700_at   | Region | Fnbp4         | 55935  | 2    | 90450119  | 90485770  | +    |
| 13894 | 1435729_at   | Region | MGI:1932697   | 83409  | 3    | 88293683  | 88296791  | -    |

|       |              |        |               |        |    |           |           |   |
|-------|--------------|--------|---------------|--------|----|-----------|-----------|---|
| 13895 | 1417865_at   | Region | Tnfaip1       | 21927  | 11 | 78248507  | 78261853  | - |
| 13896 | 1421339_at   | Region | Extl3         | 54616  | 14 | 59578943  | 59607355  | - |
| 13897 | 1418911_s_at | Region | Acsl4         | 50790  | X  | 135758036 | 135830547 | - |
| 13898 | 1416471_at   | Region | Cept1         | 99712  | 3  | 106298089 | 106343590 | - |
| 13899 | 1425483_at   | Region | Tox           | 252838 | 4  | 6614604   | 6917869   | - |
| 13900 | 1441823_at   | Region | Rai17         | 328365 | 14 | 23834490  | 24039917  | + |
| 13901 | 1435539_at   | Region | None          | None   | 5  | 33399634  | 33400612  | + |
| 13902 | 1455089_at   | Region | Gng12         | 14701  | 6  | 67148787  | 67270629  | + |
| 13903 | 1435918_at   | Region | BC055107      | 268709 | 14 | 5963634   | 5976774   | - |
| 13904 | 1417520_at   | Region | Nfe2l3        | 18025  | 6  | 51579895  | 51606046  | + |
| 13905 | 1435335_a_at | Region | MGC79224      | 432486 | 10 | 88350966  | 88419158  | + |
| 13906 | 1436164_at   | Region | Slc30a1       | 22782  | 1  | 191646393 | 191649708 | + |
| 13907 | 1458443_at   | Region | Mect1         | 382056 | 8  | 69536831  | 69594238  | - |
| 13908 | 1439999_at   | Region | None          | None   | 10 | 99007139  | 99008009  | + |
| 13909 | 1417696_at   | Region | Soat1         | 20652  | 1  | 156336595 | 156379733 | - |
| 13910 | 1416999_at   | Region | Smpd2         | 20598  | 10 | 41589000  | 41592168  | - |
| 13911 | 1422331_at   | Region | Pou3f3        | 18993  | 1  | 42991862  | 42993355  | + |
| 13912 | 1424416_at   | Region | Nkiras2       | 71966  | 11 | 100444042 | 100448689 | + |
| 13913 | 1425280_at   | Region | Leng1         | 69757  | 7  | 14891000  | 14896729  | - |
| 13914 | 1433745_at   | Region | Trio          | 223435 | 15 | 27358260  | 27724087  | - |
| 13915 | 1420905_at   | Region | Il17r         | 16172  | 6  | 120895204 | 120915007 | + |
| 13916 | 1428619_at   | Region | 2310005N03Rik | 66359  | 1  | 178273456 | 178277078 | + |
| 13917 | 1453015_at   | Region | 5830471E12Rik | 77208  | 8  | 116794427 | 116795963 | + |
| 13918 | 1436594_at   | Region | C630016O21Rik | 210105 | 7  | 37654761  | 37668386  | + |
| 13919 | 1422710_a_at | Region | Cacna1h       | 58226  | 17 | 23180201  | 23239019  | - |
| 13920 | 1416128_at   | Region | Tuba6         | 22146  | 15 | 99088281  | 99096040  | + |
| 13921 | 1448644_at   | Region | Pef1          | 67898  | 4  | 129134669 | 129155247 | + |
| 13922 | 1438773_at   | Region | Steap2        | 74051  | 5  | 5676943   | 5699766   | - |
| 13923 | 1458947_at   | Region | Fancc         | 14088  | 13 | 60694745  | 60814715  | - |
| 13924 | 1438098_at   | Region | Dlgap1        | 224997 | 17 | 68195196  | 68591524  | + |
| 13925 | 1448359_a_at | Region | MGI:1930666   | 56295  | 9  | 121862188 | 121871251 | - |
| 13926 | 1449853_at   | Region | Sfxn2         | 94279  | 19 | 46120441  | 46142562  | + |
| 13927 | 1452626_a_at | Region | 1810014F10Rik | 69064  | 7  | 115559954 | 115560372 | - |
| 13928 | 1436596_at   | Region | H2afv         | 77605  | 11 | 6323158   | 6339126   | - |
| 13929 | 1450759_at   | Region | Bmp6          | 12161  | 13 | 37884616  | 38040468  | + |
| 13930 | 1422329_a_at | Region | Ntrk3         | 18213  | 7  | 71981888  | 72367304  | - |
| 13931 | 1426344_at   | Region | Gle1l ///     |        |    |           |           |   |
| 13931 | 1426344_at   | Region | LOC383774     | 383774 | 2  | 166463726 | 166465455 | - |
| 13932 | 1458407_s_at | Region | AI429294      | 106580 | 17 | 44879273  | 44880181  | + |
| 13933 | 1434876_at   | Region | None          | None   | 15 | 93305950  | 93308554  | - |
| 13934 | 1434306_at   | Region | Rab3ip        | 216363 | 10 | 116595236 | 116639832 | - |
| 13935 | 1439081_at   | Region | Mgea5         | 76055  | 19 | 45297695  | 45330727  | - |
| 13936 | 1416449_x_at | Region | Stxbp2        | 20911  | 8  | 36313     | 47968     | + |
| 13937 | 1437852_x_at | Region | Cpsf3         | 54451  | 12 | 458       | 16231     | - |
| 13938 | 1441947_x_at | Region | BC033915      | 70661  | 9  | 46026130  | 46236394  | + |
| 13939 | 1431248_at   | Region | 5031426D15Rik | 68144  | 2  | 6842085   | 6845806   | - |
| 13940 | 1426443_at   | Region | Rhbdl7        | 215160 | 5  | 134646202 | 134657638 | + |
| 13941 | 1455047_at   | Region | Fbxo3         | 57443  | 2  | 103732553 | 103767991 | + |
| 13942 | 1436187_at   | Region | 1110054M08Rik | 68841  | 16 | 23178085  | 23179052  | - |
| 13943 | 1437902_s_at | Region | Rarres2       | 71660  | 6  | 48702577  | 48705549  | - |
| 13944 | 1449460_at   | Region | Asb13         | 142688 | 13 | 3518456   | 3536159   | + |
| 13945 | 1427003_at   | Region | Ppp2r5c       | 26931  | 12 | 105961123 | 106055786 | + |
| 13946 | 1457628_at   | Region | 2900091E11Rik | 67282  | 10 | 88172924  | 88217989  | + |
| 13947 | 1452427_s_at | Region | AW742319      | 57874  | 9  | 65109184  | 65143902  | - |
| 13948 | 1416720_at   | Region | Sfrs6         | 67996  | 2  | 162388514 | 162394090 | + |
| 13949 | 1442880_at   | Region | None          | None   | 16 | 33377005  | 33377830  | - |
| 13950 | 1436592_at   | Region | None          | None   | 17 | 30619011  | 30619737  | - |
| 13951 | 1430053_a_at | Region | 2810409H07Rik | 67059  | 2  | 72790552  | 72912196  | - |
| 13952 | 1450870_at   | Region | Rala          | 56044  | 13 | 17345050  | 17361579  | - |
| 13953 | 1416690_at   | Region | Gtpbp2        | 56055  | 17 | 43670992  | 43679289  | + |
| 13954 | 1435249_at   | Region | Btaf1         | 107182 | 19 | 36299109  | 36355422  | + |
| 13955 | 1455075_at   | Region | Pigv          | 230801 | 4  | 132621286 | 132633519 | - |
| 13956 | 1453058_at   | Region | Wdr5b         | 69544  | 16 | 34822597  | 34824381  | + |
| 13957 | 1448835_at   | Region | E2f6          | 50496  | 12 | 16177835  | 16193683  | + |
| 13958 | 1426659_a_at | Region | Rpl23a        | 268449 | 11 | 77906594  | 77909202  | - |

|       |              |        |               |        |    |           |           |   |
|-------|--------------|--------|---------------|--------|----|-----------|-----------|---|
| 13959 | 1450669_at   | Region | Map3k11       | 26403  | 19 | 5478560   | 5491655   | + |
| 13960 | 1426231_at   | Region | Vit           | 74199  | 17 | 76325212  | 76449617  | + |
| 13961 | 1436557_at   | Region | Kb36          | 223915 | 15 | 101851770 | 101860794 | - |
| 13962 | 1419883_s_at | Region | Atp6v1b2      | 11966  | 8  | 68237311  | 68262233  | + |
| 13963 | 1452662_a_at | Region | Eif2s1        | 13665  | 12 | 75718669  | 75742127  | + |
| 13964 | 1415849_s_at | Region | Stmn1         | 16765  | 4  | 133429314 | 133434742 | + |
| 13965 | 1449155_at   | Region | Polr3g        | 67486  | 13 | 77747624  | 77784787  | - |
| 13966 | 1448161_a_at | Region | Clcn4-2       | 12727  | 7  | 241       | 13444     | + |
| 13967 | 1448548_at   | Region | Tulp4         | 68842  | 17 | 6045120   | 6146999   | + |
| 13968 | 1453768_a_at | Region | 5430432M24Rik | 73847  | 2  | 151426334 | 151437065 | - |
| 13969 | 1443968_at   | Region | Adarb1        | 110532 | 10 | 77405789  | 77470808  | - |
| 13970 | 1448615_at   | Region | Ccs           | 12460  | 19 | 4614163   | 4628079   | - |
| 13971 | 1434445_at   | Region | D15Wsu169e    | 223666 | 15 | 76775364  | 76869603  | - |
| 13972 | 1424586_at   | Region | Ehbp1         | 216565 | 11 | 21900621  | 22180631  | - |
| 13973 | 1435449_at   | Region | Bcl2l11       | 12125  | 2  | 127639891 | 127676025 | + |
| 13974 | 1436206_at   | Region | Fbxo10        | 269529 | 4  | 44950173  | 45023955  | - |
| 13975 | 1428556_at   | Region | 2610022G08Rik | 66459  | 6  | 57848988  | 57854482  | - |
|       |              |        | Pgk1 ///      |        |    |           |           |   |
|       |              |        | LOC381164 /// |        |    |           |           |   |
|       |              |        | LOC432633 /// |        |    |           |           |   |
|       |              |        | LOC433594 /// |        |    |           |           |   |
| 13976 | 1439435_x_at | Region | LOC545273     | 18655  | X  | 100788594 | 100805024 | + |
| 13977 | 1450666_s_at | Region | Sca10         | 54138  | 15 | 85384867  | 85511564  | + |
| 13978 | 1450103_a_at | Region | Pscd2         | 19158  | 7  | 39891518  | 39899167  | - |
| 13979 | 1439240_x_at | Region | Lin7b         | 22342  | 7  | 39443916  | 39446815  | - |
| 13980 | 1440842_at   | Region | C230085N15Rik | 320556 | 17 | 49294754  | 49295599  | - |
| 13981 | 1460350_at   | Region | Osbp          | 76303  | 19 | 11155242  | 11190607  | + |
| 13982 | 1449351_s_at | Region | Pdgfc         | 54635  | 3  | 80765412  | 80943027  | + |
| 13983 | 1417381_at   | Region | C1qa          | 12259  | 4  | 135777175 | 135780017 | - |
| 13984 | 1415887_at   | Region | Tfg           | 21787  | 16 | 55593941  | 55620963  | - |
| 13985 | 1440348_at   | Region | Zfyve9        | 230597 | 4  | 107596378 | 107682819 | - |
| 13986 | 1423369_at   | Region | Fmr1          | 14265  | X  | 63347151  | 63386559  | + |
| 13987 | 1453633_a_at | Region | Rnf41         | 67588  | 10 | 128148476 | 128178259 | + |
| 13988 | 1420870_at   | Region | Mllt10        | 17354  | 2  | 18097281  | 18254400  | + |
| 13989 | 1421686_at   | Region | Rfrp          | 60531  | 6  | 50798600  | 50802122  | - |
| 13990 | 1419332_at   | Region | Egfl6         | 54156  | X  | 160122412 | 160185121 | - |
| 13991 | 1449098_a_at | Region | Poli          | 26447  | 18 | 70741352  | 70762990  | - |
| 13992 | 1436913_at   | Region | Cdc14a        | 229776 | 3  | 115042345 | 115193064 | - |
| 13993 | 1435223_at   | Region | Spfh2         | 244373 | 8  | 25757135  | 25772700  | + |
| 13994 | 1421336_at   | Region | Prox1         | 19130  | 1  | 189836615 | 189885751 | - |
| 13995 | 1417032_at   | Region | Ube2g2        | 22213  | 10 | 77733757  | 77757426  | + |
| 13996 | 1420000_s_at | Region | Igbp1         | 18518  | X  | 95095706  | 95117362  | + |
| 13997 | 1447421_at   | Region | None          | None   | 1  | 97830529  | 97830926  | - |
| 13998 | 1451284_at   | Region | Yipf3         | 28064  | 17 | 43758020  | 43761938  | + |
|       |              |        | Tcra ///      |        |    |           |           |   |
| 13999 | 1426113_x_at | Region | A430107P09Rik | 21473  | 14 | 48328382  | 48744068  | + |
| 14000 | 1442757_at   | Region | Lrch1         | 380916 | 14 | 69108806  | 69291857  | - |
| 14001 | 1417483_at   | Region | Nfkbiz        | 80859  | 16 | 54703494  | 54731495  | - |
| 14002 | 1420836_at   | Region | Slc25a30      | 67554  | 14 | 70104494  | 70129532  | - |
| 14003 | 1452467_at   | Region | Mmab          | 77697  | 5  | 113541603 | 113554596 | - |
| 14004 | 1415755_a_at | Region | Ube2v1        | 66589  | 2  | 167064579 | 167088725 | - |
| 14005 | 1415758_at   | Region | 2510002A14Rik | 72313  | 5  | 71804336  | 71855006  | - |
| 14006 | 1433625_at   | Region | 5830434P21Rik | 227723 | 2  | 32083319  | 32166687  | + |
| 14007 | 1429982_at   | Region | 4933426K21Rik | 108653 | 6  | 123118089 | 123137380 | - |
| 14008 | 1432464_a_at | Region | 2310057J16Rik | 69697  | 8  | 23358073  | 23360766  | + |
| 14009 | 1428642_at   | Region | Slc35d3       | 76157  | 10 | 19774080  | 19777622  | - |
| 14010 | 1439014_at   | Region | A430031N04    | 239796 | 16 | 27616035  | 27624663  | - |
| 14011 | 1454872_at   | Region | B230308N11Rik | 320060 | 17 | 32236723  | 32238815  | + |
| 14012 | 1431391_at   | Region | Ralgps1       | 241308 | 2  | 33069135  | 33303640  | - |
| 14013 | 1426685_a_at | Region | Cnot6         | 104625 | 11 | 49427539  | 49465551  | - |
| 14014 | 1416702_at   | Region | Serpini1      | 20713  | 3  | 75287431  | 75372212  | + |
| 14015 | 1428608_at   | Region | Mylc2b        | 67938  | 17 | 68745819  | 68762228  | - |
| 14016 | 1436771_x_at | Region | Pgd           | 110208 | 4  | 147642356 | 147659030 | - |
| 14017 | 1427266_at   | Region | MGI:1923998   | 76748  | 14 | 29154679  | 29206935  | + |
| 14018 | 1451152_a_at | Region | Atp1b1        | 11931  | 1  | 164355219 | 164376238 | - |

|       |              |        |               |        |    |           |           |   |
|-------|--------------|--------|---------------|--------|----|-----------|-----------|---|
| 14019 | 1452069_a_at | Region | Thap7         | 69009  | 16 | 16298950  | 16302020  | - |
| 14020 | 1418240_at   | Region | Gbp2          | 14469  | 3  | 141589637 | 141606982 | + |
| 14021 | 1453323_at   | Region | 2900079G21Rik | 331033 | 9  | 112275506 | 112277260 | + |
| 14022 | 1448627_s_at | Region | Pbk           | 52033  | 14 | 60333331  | 60345242  | + |
| 14023 | 1429618_at   | Region | Cyld          | 74256  | 8  | 87990637  | 88033868  | + |
| 14024 | 1448895_a_at | Region | Ctnna2        | 12386  | 6  | 77231681  | 78264788  | - |
| 14025 | 1441380_at   | Region | 2810439F02Rik | 72747  | 18 | 12831155  | 12924403  | + |
| 14026 | 1455393_at   | Region | None          | None   | 3  | 19329204  | 19334411  | + |
| 14027 | 1451083_s_at | Region | Aars          | 234734 | 8  | 110331687 | 110354590 | + |
| 14028 | 1447346_s_at | Region | 5530400B01Rik | 71434  | 7  | 136492284 | 136493974 | - |
| 14029 | 1453643_at   | Region | 1700001L19Rik | 69315  | 13 | 64618222  | 64634272  | + |
| 14030 | 1429736_at   | Region | 1110003F05Rik | 66145  | 17 | 8844203   | 8846425   | - |
| 14031 | 1446394_at   | Region | Oprk1         | 18387  | 1  | 5551006   | 5565381   | + |
| 14032 | 1455082_at   | Region | Cblb          | 208650 | 16 | 50949437  | 51125945  | + |
| 14033 | 1416081_at   | Region | Smad1         | 17125  | 8  | 78552485  | 78613558  | - |
| 14034 | 1434218_at   | Region | C330019G07Rik | 215476 | 5  | 31277729  | 31316129  | - |
| 14035 | 1427987_at   | Region | Safb2         | 224902 | 17 | 54251255  | 54263875  | - |
| 14036 | 1437821_at   | Region | Diap1         | 13367  | 18 | 38068549  | 38159133  | - |
| 14037 | 1423825_at   | Region | 5031439A09Rik | 68151  | 3  | 4597      | 6180      | + |
| 14038 | 1447602_x_at | Region | Sulf2         | 72043  | 2  | 165530645 | 165530946 | - |
| 14039 | 1437012_x_at | Region | Rapgef3       | 223864 | 15 | 97820598  | 97843317  | - |
| 14040 | 1453189_at   | Region | Ube2i         | 22196  | 17 | 23066362  | 23080142  | - |
| 14041 | 1416039_x_at | Region | Cyr61         | 16007  | 3  | 144622756 | 144625761 | - |
| 14042 | 1438211_s_at | Region | Dbp           | 13170  | 7  | 39788555  | 39793474  | + |
| 14043 | 1434955_at   | Region | 38412         | 72925  | 8  | 65495563  | 65579550  | + |
| 14044 | 1439325_at   | Region | Blmh          | 104184 | 11 | 76671417  | 76713035  | + |
| 14045 | 1456618_at   | Region | Mark4         | 232944 | 7  | 16295319  | 16327738  | - |
| 14046 | 1432526_a_at | Region | D11Moh34      | 27681  | 11 | 95856004  | 95868492  | + |
| 14047 | 1436365_at   | Region | Zbtb36        | 207259 | 18 | 76055363  | 76384962  | + |
| 14048 | 1421267_a_at | Region | Cited2        | 17684  | 10 | 17647360  | 17648901  | + |
| 14049 | 1436324_at   | Region | Stard9        | 211824 | 2  | 120141779 | 120229931 | + |
| 14050 | 1422693_a_at | Region | Rpo2tc1       | 20024  | 15 | 11792969  | 11807128  | - |
| 14051 | 1427739_a_at | Region | Trp53         | 22059  | 11 | 69305639  | 69317529  | + |
| 14052 | 1447704_s_at | Region | D530033C11Rik | 78581  | 15 | 51874725  | 51881202  | + |
| 14053 | 1443834_at   | Region | None          | None   | 5  | 70925059  | 70925299  | + |
| 14054 | 1436536_at   | Region | C730015A04Rik | 277978 | 8  | 104585552 | 104591726 | - |
| 14055 | 1444150_at   | Region | Epb4.1        | 269587 | 4  | 130721061 | 130868982 | - |
| 14056 | 1458781_at   | Region | Kcnk13        | 217826 | 12 | 95402386  | 95500239  | + |
| 14057 | 1428530_x_at | Region | Rps24         | 20088  | 14 | 22859652  | 22865117  | + |
| 14058 | 1445521_at   | Region | Elavl1        | 15568  | 8  | 3643294   | 3667872   | - |
| 14059 | 1440311_at   | Region | Sorbs1        | 20411  | 19 | 39839082  | 40058071  | - |
| 14060 | 1415925_a_at | Region | Nup62         | 18226  | 7  | 38891347  | 38905734  | + |
| 14061 | 1447513_at   | Region | None          | None   | 3  | 105467086 | 105467443 | + |
| 14062 | 1443508_at   | Region | Dlgap1        | 224997 | 17 | 68195196  | 68591524  | + |
| 14063 | 1426835_at   | Region | Metap1        | 75624  | 3  | 137348195 | 137378617 | - |
| 14064 | 1423917_a_at | Region | Cttn          | 13043  | 7  | 138848729 | 138882584 | - |
| 14065 | 1450381_a_at | Region | Bcl6          | 12053  | 16 | 22748871  | 22772551  | - |
| 14066 | 1416862_at   | Region | Stam          | 20844  | 2  | 14000384  | 14074610  | + |
| 14067 | 1446681_at   | Region | BB086117      | 105710 | 14 | 30541274  | 30541905  | - |
| 14068 | 1434421_at   | Region | B930052A04Rik | 320563 | 9  | 58310393  | 58316229  | - |
| 14069 | 1431179_at   | Region | Entpd7        | 93685  | 19 | 43234237  | 43276021  | + |
| 14070 | 1455738_at   | Region | Al851076      | 237859 | 11 | 76769951  | 76804094  | - |
| 14071 | 1449418_s_at | Region | Fbxo36        | 66153  | 1  | 33563905  | 33564395  | - |
| 14072 | 1455827_at   | Region | Mbnl2         | 105559 | 14 | 114846670 | 115003029 | + |
| 14073 | 1451347_at   | Region | Al225782      | 233875 | 7  | 120902164 | 120911194 | - |
| 14074 | 1433721_x_at | Region | Rps21         | 66481  | 2  | 179974367 | 179975394 | + |
| 14075 | 1434173_s_at | Region | D19Bwg1357e   | 52874  | 19 | 26629949  | 26669888  | - |
| 14076 | 1432189_a_at | Region | Sox5          | 20678  | 6  | 144679075 | 145055646 | - |
| 14077 | 1448146_at   | Region | Wwp2          | 66894  | 8  | 106734091 | 106856288 | + |
| 14078 | 1437976_x_at | Region | Rpl23a        | 268449 | 11 | 77906594  | 77909202  | - |
| 14079 | 1448806_at   | Region | None          | None   | 2  | 155232340 | 155275328 | + |
| 14080 | 1434438_at   | Region | Samhd1        | 56045  | 2  | 156554498 | 156592191 | - |
| 14081 | 1426004_a_at | Region | Tgm2          | 21817  | 2  | 157573374 | 157603361 | - |
| 14082 | 1419068_at   | Region | Rabgef1       | 56715  | 5  | 129357005 | 129384162 | + |
| 14083 | 1434131_at   | Region | Rufy1         | 216724 | 11 | 50142144  | 50183952  | - |

|       |              |        |               |        |    |           |           |   |
|-------|--------------|--------|---------------|--------|----|-----------|-----------|---|
| 14084 | 1455497_at   | Region | Leng9         | 243813 | 7  | 3369041   | 3370730   | - |
| 14085 | 1433980_at   | Region | Htatip        | 81601  | 19 | 5392208   | 5398819   | - |
| 14086 | 1436011_at   | Region | Elmo2         | 140579 | 2  | 164744764 | 164783212 | - |
| 14087 | 1450659_at   | Region | Rgs7          | 24012  | 1  | 174991921 | 175425099 | - |
| 14088 | 1440053_at   | Region | 9430093N24Rik | 320924 | 18 | 66290942  | 66524129  | - |
| 14089 | 1459078_at   | Region | Rbpms         | 19663  | 8  | 32589665  | 32735420  | - |
| 14090 | 1424748_at   | Region | Galnt11       | 231050 | 5  | 23692442  | 23735467  | + |
| 14091 | 1422686_s_at | Region | Sec8I1        | 20336  | 6  | 33334773  | 34062752  | + |
| 14092 | 1437849_x_at | Region | Armcx2        | 67416  | X  | 128349086 | 128353933 | - |
| 14093 | 1457313_at   | Region | Ocr1          | 320634 | X  | 42433252  | 42486664  | + |
| 14094 | 1436627_at   | Region | D17ErtD663e   | 52042  | 17 | 11702064  | 11702504  | - |
| 14095 | 1451930_at   | Region | None          | None   | 17 | 60378565  | 60379950  | - |
| 14096 | 1435267_at   | Region | A430108E01Rik | 384382 |    | 59299527  | 59300427  | + |
| 14097 | 1449510_at   | Region | Zfp467        | 68910  | 6  | 48570465  | 48578486  | - |
| 14098 | 1424036_at   | Region | 2610031L17Rik | 68879  | 2  | 181318349 | 181372617 | + |
| 14099 | 1426468_at   | Region | 0610037L13Rik | 74098  | 4  | 106848804 | 106856707 | + |
| 14100 | 1449137_at   | Region | Pdha1         | 18597  | X  | 153721624 | 153737741 | - |
| 14101 | 1428309_s_at | Region | Pdrg1         | 68559  | 2  | 152465826 | 152472319 | - |
| 14102 | 1450852_s_at | Region | F2r           | 14062  | 13 | 91791978  | 91808621  | - |
| 14103 | 1424399_at   | Region | Uck1          | 22245  | 2  | 32187164  | 32192224  | - |
| 14104 | 1434220_at   | Region | Nup98         | 269966 | 7  | 96225342  | 96231267  | - |
| 14105 | 1432538_a_at | Region | Rfc3          | 69263  | 5  | 120       | 8093      | + |
| 14106 | 1452302_at   | Region | Arhgef10      | 234094 | 8  | 14307382  | 14378920  | + |
| 14107 | 1456643_at   | Region | 9230114K14Rik | 414108 | 5  | 51001477  | 51008589  | + |
| 14108 | 1416119_at   | Region | Txn1          | 22166  | 4  | 57886822  | 57899740  | - |
| 14109 | 1450082_s_at | Region | Etv5          | 104156 | 16 | 21153380  | 21211575  | - |
| 14110 | 1416607_at   | Region | 4931406C07Rik | 70984  | 9  | 15120247  | 15138698  | - |
| 14111 | 1418383_at   | Region | Apcdd1        | 494504 | 18 | 63040206  | 63182348  | + |
| 14112 | 1418142_at   | Region | Kcnj8         | 16523  | 6  | 143408208 | 143414626 | - |
| 14113 | 1442135_at   | Region | Gm237         | 211488 | 10 | 67598925  | 67602736  | - |
| 14114 | 1440364_a_at | Region | A230062G08Rik | 231326 | 5  | 76120378  | 76149959  | - |
| 14115 | 1428148_s_at | Region | Coro7         | 78885  | 16 | 4297661   | 4351229   | - |
| 14116 | 1434804_at   | Region | Sec15I2       | 75914  | 6  | 84969806  | 85419115  | - |
| 14117 | 1456614_at   | Region | Acn9          | 71238  | 6  | 6928768   | 7012424   | + |
| 14118 | 1460405_at   | Region | Arhgef10I     | 72754  | 4  | 139395746 | 139530011 | - |
| 14119 | 1457782_at   | Region | Tln1          | 21894  | 4  | 43447441  | 43472672  | - |
| 14120 | 1455098_a_at | Region | Vtn           | 22370  | 11 | 78224945  | 78227983  | + |
| 14121 | 1451143_at   | Region | 1110006G06Rik | 73833  | 7  | 24563921  | 24567592  | - |
| 14122 | 1442087_at   | Region | None          | None   | 1  | 180760213 | 180760526 | - |
| 14123 | 1416838_at   | Region | Mut           | 17850  | 17 | 38451138  | 38475743  | + |
| 14124 | 1454092_a_at | Region | Gtf2h3        | 209357 | 5  | 123750514 | 123768184 | + |
| 14125 | 1424746_at   | Region | Kif1c         | 16562  | 11 | 70428458  | 70454537  | + |
| 14126 | 1455734_at   | Region | Crbn          | 58799  | 6  | 107274263 | 107296083 | - |
| 14127 | 1445421_at   | Region | None          | None   | 2  | 16686767  | 16687400  | + |
| 14128 | 1437716_x_at | Region | Kif22         | 110033 | 7  | 121077462 | 121092151 | - |
| 14129 | 1427199_at   | Region | 2510002A14Rik | 72313  | 5  | 71804336  | 71855006  | - |
| 14130 | 1436156_at   | Region | Ccar1         | 67500  | 10 | 62710847  | 62758641  | - |
| 14131 | 1439185_x_at | Region | D430028G21Rik | 228607 | 2  | 130747991 | 130761878 | + |
| 14132 | 1426681_at   | Region | Zc3h5         | 217331 | 11 | 115851415 | 115882287 | + |
| 14133 | 1460448_s_at | Region | Ttc14         | 67120  | 3  | 33243957  | 33251783  | + |
| 14134 | 1436077_a_at | Region | Fcho1         | 74015  | 8  | 70858707  | 70875819  | - |
| 14135 | 1456805_a_at | Region | C030010B13Rik | 77310  | 2  | 173046327 | 173120005 | - |
| 14136 | 1451932_a_at | Region | Tsrc1         | 229595 | 3  | 95164036  | 95175690  | - |
| 14137 | 1450034_at   | Region | Stat1         | 20846  | 1  | 52420399  | 52461905  | + |
| 14138 | 1440052_at   | Region | Efna5         | 13640  | 17 | 60297708  | 60574961  | - |
| 14139 | 1415863_at   | Region | Eif4g2        | 13690  | 7  | 104925069 | 104936167 | - |
| 14140 | 1434769_at   | Region | Btbd9         | 224671 | 17 | 28030141  | 28340405  | - |
| 14141 | 1452650_at   | Region | Trim62        | 67525  | 4  | 127911253 | 127938439 | + |
| 14142 | 1441783_at   | Region | None          | None   | 14 | 51335750  | 51336002  | + |
| 14143 | 1416971_at   | Region | Cox7a2        | 12866  | 9  | 79961062  | 79965429  | - |
| 14144 | 1423722_at   | Region | Tmem49        | 75909  | 11 | 86311857  | 86411814  | - |
| 14145 | 1421708_a_at | Region | Stat6         | 20852  | 10 | 127343744 | 127397113 | + |
| 14146 | 1439915_at   | Region | Mrg1          | 17536  | 2  | 115376917 | 115578960 | - |
| 14147 | 1421789_s_at | Region | Arf3          | 11842  | 15 | 98795066  | 98820699  | - |
| 14148 | 1423210_a_at | Region | Nola3         | 66181  | 2  | 111885207 | 111886138 | + |

















|       |              |        |                   |        |      |           |           |      |
|-------|--------------|--------|-------------------|--------|------|-----------|-----------|------|
| 14602 | 1420745_a_at | Region | Ccndbp1           | 17151  | 2    | 120522360 | 120530740 | +    |
| 14603 | 1460476_s_at | Region | 1200015N20Rik     | 71721  | 10   | 70495074  | 70612698  | +    |
| 14604 | 1429905_at   | Region | 3110009O07Rik     | 73077  | 1    | 138673401 | 138674811 | -    |
| 14605 | 1447943_x_at | Region | Yeats2            | 208146 | 16   | 18922076  | 19003907  | +    |
| 14606 | 1417693_a_at | Region | Gab1              | 14388  | 8    | 79976442  | 80092487  | -    |
| 14607 | 1424407_s_at | Region | Cbx6              | 494448 | 15   | 79878420  | 79886557  | -    |
| 14608 | 1430494_at   | Region | 9130001I21Rik     | 71608  | 11   | 5616292   | 5617664   | -    |
| 14609 | 1428576_at   | Region | Hif1an            | 319594 | 19   | 44107275  | 44174420  | +    |
| 14610 | 1452715_at   | Region | 2310022K01Rik     | 71909  | 7    | 26066403  | 26077663  | -    |
| 14611 | 1421633_a_at | Region | Hapln1            | 12950  | 13   | 85655519  | 85726506  | +    |
| 14612 | 1417254_at   | Region | Spata5            | 57815  | 3    | 36883896  | 37042689  | +    |
| 14613 | 1417400_at   | Region | Rai14             | 75646  | 15   | 10381371  | 10524496  | -    |
| 14614 | 1455398_at   | Region | Lrrc8c            | 100604 | 5    | 104581541 | 104671026 | +    |
| 14615 | 1433876_at   | Region | 6430402H13Rik     | 378937 | 15   | 76766654  | 76773552  | -    |
| 14616 | 1454875_a_at | Region | Rbbp4             | 19646  | 4    | 128334213 | 128362483 | -    |
| 14617 | 1446510_at   | Region | Phip              | 83946  | 9    | 83198955  | 83305205  | -    |
| 14618 | 1421342_at   | Region | Kcns2             | 16539  | 15   | 34837430  | 34842137  | +    |
| 14619 | 1436093_at   | Region | None              | None   | 4    | 123944356 | 123944915 | +    |
| 14620 | 1430232_at   | Region | 4933407E14Rik     | 71017  | 15   | 76085454  | 76086571  | +    |
| 14621 | 1421368_at   | Region | Scrt1             | 170729 | 15   | 76566591  | 76572559  | -    |
| 14622 | 1444449_at   | Region | None              | None   | 6    | 121704215 | 121704688 | -    |
| 14623 | 1418143_at   | Region | Vps45             | 22365  | 3    | 95487692  | 95546287  | -    |
|       |              |        | Tcra ///          |        |      |           |           |      |
|       |              |        | A430107P09Rik /// |        |      |           |           |      |
|       |              |        | LOC545051 ///     |        |      |           |           |      |
| 14624 | 1426168_a_at | Region | LOC547333         | 21473  | 14   | 48285053  | 48742963  | +    |
| 14625 | 1422732_at   | Region | Poldip2           | 67811  | 11   | 78237955  | 78248395  | +    |
| 14626 | 1418532_at   | Region | Fzd2              | 57265  | 11   | 102425622 | 102427671 | +    |
| 14627 | 1454622_at   | Region | Slc38a5           | 209837 | X    | 6510334   | 6519114   | +    |
| 14628 | 1455226_at   | Region | LOC383567         | 383567 | 12   | 73437073  | 73437895  | -    |
| 14629 | 1451794_at   | Region | Tmcc3             | 319880 | 10   | 94549417  | 94562436  | +    |
|       |              |        | Tcra ///          |        |      |           |           |      |
|       |              |        | A430107P09Rik /// |        |      |           |           |      |
| 14630 | 1452405_x_at | Region | LOC545051         | 21473  | 14   | 48197821  | 48744068  | +    |
| 14631 | 1448224_at   | Region | Tfam              | 21780  | 10   | 71279444  | 71292011  | -    |
| 14632 | 1422902_s_at | Region | Mgea5             | 76055  | 19   | 45297695  | 45330727  | -    |
| 14633 | 1452287_at   | Region | Msi1h             | 17690  | 5    | 114542007 | 114567198 | +    |
| 14634 | 1421139_a_at | Region | Zfp386            | 56220  | 12   | 111816578 | 111828697 | +    |
| 14635 | 1448555_at   | Region | D15Ertd682e       | 71919  | 15   | 97750750  | 97781467  | -    |
| 14636 | 1445363_at   | Region | 2810055G20Rik     | 77994  | 16   | 12004013  | 12372207  | +    |
| 14637 | 1442913_at   | Region | None              | None   | NONE | NONE      | NONE      | NONE |
| 14638 | 1425231_a_at | Region | Zfp46             | 22704  | 4    | 135167326 | 135173657 | +    |
| 14639 | 1445275_at   | Region | None              | None   |      | 60273768  | 60274413  | +    |
| 14640 | 1452276_at   | Region | Smarcad1          | 13990  | 6    | 65294592  | 65368042  | +    |
| 14641 | 1440757_at   | Region | None              | None   | 12   | 113111341 | 113111772 | +    |
| 14642 | 1435061_at   | Region | Nudt11            | 58242  | X    | 4357660   | 4364650   | +    |
| 14643 | 1422855_at   | Region | Cpsf3             | 54451  | 12   | 458       | 16231     | -    |
| 14644 | 1417361_at   | Region | Asb3              | 65257  | 11   | 30849253  | 30996260  | +    |
| 14645 | 1429122_a_at | Region | 1700040I03Rik     | 73327  | 6    | 85796727  | 85801218  | -    |
| 14646 | 1448360_s_at | Region | D1Ertd396e        | 52477  | 1    | 190665121 | 190682759 | +    |
| 14647 | 1456139_at   | Region | Igf2r             | 16004  | 17   | 11321447  | 11408701  | -    |
| 14648 | 1418627_at   | Region | Gclm              | 14630  | 3    | 121023929 | 121044985 | +    |
| 14649 | 1446523_at   | Region | None              | None   | 14   | 58131731  | 58132379  | -    |
| 14650 | 1437763_at   | Region | BC030335          | 233805 | 7    | 113731380 | 113770970 | -    |
| 14651 | 1454770_at   | Region | Cckbr             | 12426  | 7    | 99538177  | 99548695  | +    |
| 14652 | 1433539_at   | Region | Commd3            | 12238  | 2    | 18714472  | 18718226  | +    |
| 14653 | 1449999_a_at | Region | Cacna2d1          | 12293  | 5    | 14583526  | 14791513  | +    |
| 14654 | 1451918_a_at | Region | Loh12cr1          | 67774  | 6    | 135398449 | 135468638 | +    |
| 14655 | 1456028_x_at | Region | Marcks            | 17118  | 10   | 37207003  | 37211096  | -    |
| 14656 | 1435656_at   | Region | Gmps              | 229363 | 3    | 63642160  | 63687698  | +    |
| 14657 | 1434176_x_at | Region | Poldip3           | 73826  | 15   | 83176653  | 83200011  | -    |
| 14658 | 1454609_x_at | Region | 6430527G18Rik     | 238330 | 12   | 83753740  | 83757850  | -    |
| 14659 | 1454507_at   | Region | 8430432A02Rik     | 71524  | 1    | 43387305  | 43388553  | +    |
| 14660 | 1418006_at   | Region | LOC546337         | 546337 | X    | 73515358  | 73518950  | -    |
| 14661 | 1418214_at   | Region | Klc2              | 16594  | 19   | 4896536   | 4907034   | -    |



|       |              |        |                         |        |      |           |           |      |
|-------|--------------|--------|-------------------------|--------|------|-----------|-----------|------|
| 14662 | 1428698_at   | Region | 2310004I03Rik           | 76430  | 9    | 65203085  | 65206705  | +    |
| 14663 | 1453313_at   | Region | Sesn3                   | 75747  | 9    | 14111292  | 14161413  | +    |
| 14664 | 1419324_at   | Region | Lhx9                    | 16876  | 1    | 138672251 | 138686188 | -    |
| 14665 | 1428080_at   | Region | 2610528A17Rik           | 72542  | 5    | 109309939 | 109320666 | -    |
| 14666 | 1426151_a_at | Region | Stx3                    | 20908  | 19   | 10973053  | 11015388  | -    |
| 14667 | 1452397_at   | Region | 2810474O19Rik           | 67246  | 6    | 24756910  | 24759603  | +    |
| 14668 | 1428851_at   | Region | 1300014I06Rik           | 66895  | 13   | 34160016  | 34184847  | -    |
| 14669 | 1418860_a_at | Region | Letmd1                  | 68614  | 15   | 100526632 | 100536702 | +    |
| 14670 | 1455710_x_at | Region | Mtcp1                   | 17763  | X    | 70065501  | 70077198  | -    |
| 14671 | 1417766_at   | Region | 1810044O22Rik           | 66427  | 8    | 106448348 | 106485157 | +    |
| 14672 | 1423705_at   | Region | 2310057D15Rik           | 67870  | 5    | 99058653  | 99087401  | +    |
| 14673 | 1423223_a_at | Region | Prdx6                   | 11758  | 1    | 161144235 | 161155289 | -    |
| 14674 | 1460135_at   | Region | A930005H10Rik           | 68161  | 3    | 114652097 | 114658964 | -    |
| 14675 | 1429642_at   | Region | Anubl1                  | 67492  | 6    | 116701745 | 116767837 | +    |
| 14676 | 1442867_at   | Region | None                    | None   | 9    | 64834053  | 64834915  | -    |
| 14677 | 1418893_at   | Region | Pbx2                    | 18515  | 17   | 32293780  | 32299792  | +    |
| 14678 | 1434117_at   | Region | Tceb3                   | 27224  | 4    | 134884627 | 134902906 | -    |
| 14679 | 1441317_x_at | Region | MGI:1923321             | 76071  | 5    | 35557428  | 35631807  | +    |
| 14680 | 1439273_at   | Region | Ripk1                   | 19766  | 13   | 33537383  | 33569679  | +    |
| 14681 | 1437681_at   | Region | Grik4                   | 110637 | 9    | 42479281  | 42777274  | -    |
| 14682 | 1425182_x_at | Region | Klk22 /// Klk9          | 13646  | 7    | 38187015  | 38191208  | +    |
| 14683 | 1438026_at   | Region | 2310030G09Rik           | 68030  | NONE | NONE      | NONE      | NONE |
| 14684 | 1442917_at   | Region | LOC432607               | 432607 | 11   | 102397577 | 102400730 | -    |
| 14685 | 1440579_at   | Region | Mib1                    | 225164 | 18   | 10770969  | 10857561  | +    |
| 14686 | 1459843_s_at | Region | Smad1                   | 17125  | 8    | 78552485  | 78613558  | -    |
| 14687 | 1416557_a_at | Region | MGI:1336880             | 20624  | 11   | 102659566 | 102702006 | -    |
| 14688 | 1418324_at   | Region | Fem1b                   | 14155  | 9    | 62914316  | 62934099  | -    |
| 14689 | 1449140_at   | Region | Nudcd2                  | 52653  | 11   | 40472609  | 40478985  | +    |
| 14690 | 1428491_at   | Region | CommD10                 | 69456  | 18   | 47180632  | 47309751  | +    |
| 14691 | 1460404_at   | Region | Sr278                   | 432766 | 13   | 61254171  | 61284103  | +    |
| 14692 | 1427959_at   | Region | Abhd10                  | 213012 | 16   | 44615021  | 44627461  | -    |
| 14693 | 1435226_at   | Region | lbrdc3                  | 75234  | 4    | 128085580 | 128112996 | +    |
| 14694 | 1435829_at   | Region | B930008K04Rik           | 215693 | X    | 128517716 | 128523567 | -    |
| 14695 | 1416832_at   | Region | Slc39a8                 | 67547  | 3    | 134710465 | 134772768 | +    |
| 14696 | 1450057_at   | Region | 2610042O14Rik           | 66460  | 2    | 163917729 | 163922245 | +    |
| 14697 | 1416051_at   | Region | C2                      | 12263  | 17   | 32565421  | 32584866  | -    |
| 14698 | 1457764_at   | Region | A530058O07Rik           | 97881  | 13   | 15269258  | 15270095  | -    |
| 14699 | 1432075_a_at | Region | Tekt1                   | 21689  | 11   | 72070380  | 72087531  | -    |
| 14700 | 1430699_at   | Region | Gpr165                  | 76206  | X    | 91314802  | 91318847  | +    |
| 14701 | 1438976_x_at | Region | Mat2a                   | 232087 | 6    | 72764773  | 72771532  | -    |
| 14702 | 1451208_at   | Region | Etf1                    | 225363 | 18   | 35127577  | 35155611  | -    |
| 14703 | 1450725_s_at | Region | Car14                   | 23831  | 3    | 95385632  | 95392471  | -    |
| 14704 | 1438992_x_at | Region | Atf4                    | 11911  | 15   | 80308201  | 80310204  | +    |
| 14705 | 1457341_at   | Region | None                    | None   | 2    | 119254672 | 119255259 | -    |
| 14706 | 1451475_at   | Region | Plxnd1                  | 67784  | 6    | 116393275 | 116432499 | -    |
| 14707 | 1419310_s_at | Region | Rfxank                  | 19727  | 8    | 69285462  | 69292088  | -    |
| 14708 | 1436520_at   | Region | AI450948                | 382643 | 12   | 108251581 | 108278490 | -    |
| 14709 | 1439460_a_at | Region | Zfp289 ///<br>LOC434076 | 434076 | 6    | 113126598 | 113129317 | +    |
| 14710 | 1423761_at   | Region | 5630401D24Rik           | 71449  | 1    | 162443384 | 162458080 | -    |
| 14711 | 1451721_a_at | Region | H2-Ab1                  | 14961  | 17   | 31964475  | 31970648  | +    |
| 14712 | 1454532_at   | Region | C030043A13Rik           | 77646  | 4    | 107809843 | 107810925 | +    |
| 14713 | 1436199_at   | Region | Trim14                  | 74735  | 4    | 46422769  | 46452063  | -    |
| 14714 | 1448692_at   | Region | Ubqln4                  | 94232  | 3    | 88297580  | 88313589  | +    |
| 14715 | 1428303_at   | Region | 1500005I02Rik           | 72014  | 11   | 114611762 | 114616985 | -    |
| 14716 | 1429224_at   | Region | Pnma1                   | 70481  | 12   | 81010448  | 81012742  | -    |
| 14717 | 1421949_a_at | Region | 2610507L03Rik           | 72140  | 7    | 30562511  | 30603407  | +    |
| 14718 | 1435387_at   | Region | AI505012                | 223804 | 15   | 91320346  | 91321979  | -    |
| 14719 | 1434347_s_at | Region | None                    | None   | 10   | 62970027  | 62970706  | +    |
| 14720 | 1419101_at   | Region | Sin3a                   | 20466  | 9    | 57189858  | 57241642  | +    |
| 14721 | 1451975_at   | Region | 2810453I06Rik           | 67238  | 5    | 142607596 | 142623478 | +    |
| 14722 | 1444062_at   | Region | 2900056L01Rik           | 73050  | 15   | 62273515  | 62274555  | +    |
| 14723 | 1416631_at   | Region | Ap4b1                   | 67489  | 3    | 103237019 | 103249414 | +    |
| 14724 | 1452750_at   | Region | 5530601H04Rik           | 71445  | X    | 99638560  | 99671489  | -    |
| 14725 | 1438289_a_at | Region | Sumo1                   | 22218  | 1    | 59942975  | 59974347  | -    |

|       |              |        |               |        |      |           |           |      |
|-------|--------------|--------|---------------|--------|------|-----------|-----------|------|
| 14726 | 1451351_at   | Region | Ttc13         | 234875 | 8    | 123958404 | 124009066 | -    |
| 14727 | 1419798_at   | Region | 2610019E17Rik | 75614  | 17   | 22331852  | 22332329  | +    |
| 14728 | 1432472_a_at | Region | Mccc2         | 78038  | 13   | 96151384  | 96164931  | -    |
| 14729 | 1459288_at   | Region | Kcnd2         | 16508  | 6    | 21263145  | 21776841  | +    |
| 14730 | 1441461_at   | Region | Frm4a         | 209630 | 2    | 4348468   | 4531213   | +    |
| 14731 | 1437122_at   | Region | Bcl2          | 12043  | 1    | 106479000 | 106655083 | -    |
| 14732 | 1448662_at   | Region | Fzd6          | 14368  | 15   | 38905352  | 38937760  | +    |
| 14733 | 1433526_at   | Region | Klhl8         | 246293 | 5    | 102896841 | 102946020 | -    |
| 14734 | 1440803_x_at | Region | Tacr3         | 21338  | 3    | 133712014 | 133817494 | +    |
| 14735 | 1424180_a_at | Region | Thrap4        | 23989  | 11   | 98525688  | 98550454  | -    |
| 14736 | 1447432_s_at | Region | Zfp263        | 74120  | 16   | 3415695   | 3422348   | +    |
| 14737 | 1420832_at   | Region | Qscn6         | 104009 | 1    | 155674165 | 155708148 | -    |
| 14738 | 1449569_at   | Region | Thpo          | 21832  | 16   | 19496631  | 19505618  | -    |
| 14739 | 1442494_at   | Region | C79242        | 98068  | 17   | 44520980  | 44521682  | -    |
| 14740 | 1459316_at   | Region | Crybb3        | 12962  | 5    | 112147135 | 112151946 | -    |
| 14741 | 1442562_at   | Region | D630040G17Rik | 244530 | 8    | 78407158  | 78407858  | +    |
| 14742 | 1442216_at   | Region | Atp6v0d1      | 11972  | 8    | 104820098 | 104861668 | -    |
| 14743 | 1434570_at   | Region | AK122525      | 331623 | 10   | 43585500  | 43621771  | +    |
| 14744 | 1448187_at   | Region | Pold1         | 18971  | 7    | 38608666  | 38624732  | -    |
| 14745 | 1442054_at   | Region | None          | None   | 2    | 181006795 | 181007208 | +    |
| 14746 | 1423908_at   | Region | Ndufs8        | 225887 | 19   | 3697661   | 3701550   | -    |
| 14747 | 1429259_a_at | Region | 1810014B01Rik | 544717 | 10   | 82507736  | 82511798  | -    |
| 14748 | 1451398_at   | Region | BC009118      | 234309 | 8    | 60552965  | 60568663  | +    |
| 14749 | 1438429_at   | Region | 2610319H10Rik | 72505  | 8    | 10994869  | 10998339  | -    |
| 14750 | 1427565_a_at | Region | Abcc5         | 27416  | 16   | 19102921  | 19197967  | -    |
| 14751 | 1423667_at   | Region | Mat2a         | 232087 | 6    | 72764773  | 72771532  | -    |
| 14752 | 1425073_at   | Region | Plekhg6       | 213522 | 6    | 126019331 | 126037184 | -    |
| 14753 | 1440930_a_at | Region | LOC545474     | 545474 | 2    | 151550295 | 151552735 | +    |
| 14754 | 1441539_at   | Region | None          | None   | 6    | 145554705 | 145555373 | -    |
| 14755 | 1455305_x_at | Region | None          | None   | 14   | 55533909  | 55858469  | -    |
| 14756 | 1442845_at   | Region | C130075A20Rik | 320395 | 3    | 52733872  | 52734993  | +    |
| 14757 | 1452011_a_at | Region | Uxs1          | 67883  | 1    | 44044005  | 44123567  | -    |
| 14758 | 1421941_at   | Region | Camk4         | 12326  | 18   | 33179625  | 33409958  | +    |
| 14759 | 1435203_at   | Region | Man2a2        | 140481 | 7    | 74160715  | 74171123  | -    |
| 14760 | 1426536_at   | Region | Narg2         | 93697  | 9    | 69529686  | 69564588  | +    |
| 14761 | 1427068_x_at | Region | 4933439F18Rik | 66771  | 11   | 60142945  | 60170919  | +    |
| 14762 | 1424120_at   | Region | Rnf8          | 58230  | 17   | 27424760  | 27451559  | +    |
| 14763 | 1456930_at   | Region | Camsap1       | 227634 | 2    | 25860417  | 25927345  | -    |
| 14764 | 1430849_a_at | Region | Cgrrf1        | 68755  | 14   | 41912127  | 41934073  | +    |
| 14765 | 1432271_a_at | Region | 4833420K19Rik | 76863  | 9    | 7176782   | 7200101   | +    |
| 14766 | 1454641_at   | Region | Cggbp1        | 106143 | 16   | 63876856  | 63884262  | +    |
| 14767 | 1417605_s_at | Region | Camk1         | 52163  | 6    | 113901957 | 113911755 | -    |
| 14768 | 1425572_a_at | Region | Ddef1         | 13196  | 15   | 64104369  | 64365898  | -    |
| 14769 | 1421070_at   | Region | D3Erd300e     | 56790  | 3    | 54327325  | 54351057  | +    |
| 14770 | 1434567_at   | Region | 4732496O08Rik | 242736 | 4    | 142327675 | 142336336 | +    |
| 14771 | 1423338_at   | Region | Ccdc16        | 66983  | 11   | 82504010  | 82506449  | +    |
| 14772 | 1455937_at   | Region | Lrrtm4        | 243499 | 6    | 80352899  | 80359760  | +    |
| 14773 | 1435553_at   | Region | Pdzk3         | 68070  | 15   | 12395836  | 12406377  | -    |
| 14774 | 1443665_at   | Region | D030011O10Rik | 320560 | 6    | 149949871 | 150037421 | -    |
| 14775 | 1454295_at   | Region | Nrip1         | 268903 | 16   | 75376752  | 75458939  | -    |
| 14776 | 1439773_at   | Region | Ly6e          | 17069  | 15   | 74988361  | 74992036  | +    |
| 14777 | 1431469_a_at | Region | Cxxc5         | 67393  | 18   | 36053483  | 36085353  | +    |
| 14778 | 1436107_at   | Region | None          | None   | 6    | 18903976  | 18905180  | +    |
| 14779 | 1452963_at   | Region | 9530077C05Rik | 68283  | 9    | 22301973  | 22335077  | +    |
| 14780 | 1438094_x_at | Region | 2810409H07Rik | 67059  | 2    | 72790552  | 72912196  | -    |
| 14781 | 1434201_at   | Region | None          | None   | NONE | NONE      | NONE      | NONE |
| 14782 | 1425678_a_at | Region | Snrk          | 20623  | 9    | 122152064 | 122189861 | +    |
| 14783 | 1460240_a_at | Region | Hnrpc         | 15381  | 14   | 47175503  | 47204310  | -    |
| 14784 | 1435608_at   | Region | BC019575      | 407821 | 11   | 5174112   | 5343821   | -    |
| 14785 | 1456682_at   | Region | 2900060P06Rik | 381338 | 1    | 39094259  | 39094964  | -    |
| 14786 | 1435849_at   | Region | None          | None   | 7    | 133484825 | 133485552 | +    |
| 14787 | 1441964_at   | Region | 1110003F05Rik | 66145  | 17   | 8843312   | 8844213   | -    |
| 14788 | 1434632_at   | Region | None          | None   | 7    | 101542024 | 101542935 | +    |
| 14789 | 1418092_s_at | Region | Trip10        | 106628 | 17   | 54939205  | 54953935  | +    |
| 14790 | 1436015_s_at | Region | Stk4          | 58231  | 2    | 163531147 | 163612490 | +    |

|       |              |        |               |        |      |           |           |      |
|-------|--------------|--------|---------------|--------|------|-----------|-----------|------|
| 14791 | 1437613_s_at | Region | AW456874      | 218232 | 13   | 48175930  | 48223631  | -    |
| 14792 | 1440209_at   | Region | 38412         | 72925  | 8    | 65495563  | 65579550  | +    |
| 14793 | 1450690_at   | Region | Ranbp2        | 19386  | 10   | 58404785  | 58452252  | +    |
| 14794 | 1438133_a_at | Region | Cyr61         | 16007  | 3    | 144622756 | 144625761 | -    |
| 14795 | 1443921_at   | Region | C130037N17Rik | 223332 | 15   | 8857529   | 8869181   | +    |
| 14796 | 1421908_a_at | Region | Tcf12         | 21406  | 9    | 71980605  | 72246476  | -    |
| 14797 | 1423547_at   | Region | Lyzs          | 17105  | 10   | 116966784 | 116971715 | -    |
| 14798 | 1451987_at   | Region | Arrb2         | 216869 | 11   | 70158356  | 70166481  | +    |
| 14799 | 1420709_s_at | Region | Dao1          | 13142  | 5    | 113120480 | 113135550 | +    |
| 14800 | 1422791_at   | Region | Pafah1b2      | 18475  | 9    | 45981441  | 45998071  | -    |
| 14801 | 1442565_at   | Region | Pcdh10        | 18526  | 3    | 44837486  | 44841910  | +    |
| 14802 | 1415901_at   | Region | Plod3         | 26433  | 5    | 136000144 | 136009661 | +    |
| 14803 | 1435561_at   | Region | Erf           | 13875  | 7    | 20426320  | 20430075  | -    |
| 14804 | 1436820_at   | Region | Kctd11        | 216858 | 11   | 69603335  | 69607064  | -    |
| 14805 | 1444184_at   | Region | 1810020C19Rik | 69113  | 2    | 93685235  | 93715406  | -    |
| 14806 | 1444069_at   | Region | None          | None   | NONE | NONE      | NONE      | NONE |
| 14807 | 1432294_at   | Region | 9330177L23Rik | 77246  | 5    | 130783832 | 130784932 | +    |
| 14808 | 1441266_at   | Region | 5730526G10Rik | 70656  | 12   | 48391185  | 48391586  | -    |
| 14809 | 1435478_at   | Region | Wdr26         | 226757 | 1    | 181127041 | 181127910 | -    |
| 14810 | 1418631_at   | Region | Ube2h         | 22214  | 6    | 30260446  | 30352143  | -    |
| 14811 | 1434971_x_at | Region | None          | None   | 1    | 4736769   | 4738037   | -    |
| 14812 | 1456812_at   | Region | Abcd2         | 26874  | 15   | 91198527  | 91244463  | -    |
| 14813 | 1436706_at   | Region | Tmem32        | 236792 | X    | 51340226  | 51352633  | -    |
| 14814 | 1426369_at   | Region | Mlst2         | 67420  | 7    | 107366377 | 107420898 | +    |
| 14815 | 1451142_at   | Region | Sec3l1        | 69940  | 5    | 75774556  | 75815526  | +    |
| 14816 | 1434376_at   | Region | Cd44          | 12505  | 2    | 102518748 | 102606202 | -    |
| 14817 | 1437734_at   | Region | Ppp1r12a      | 17931  | 10   | 108049328 | 108167253 | +    |
| 14818 | 1460292_a_at | Region | Smarca1       | 93761  | X    | 42330166  | 42413315  | -    |
| 14819 | 1415899_at   | Region | Junb          | 16477  | 8    | 84245110  | 84246926  | -    |
| 14820 | 1450020_at   | Region | Cx3cr1        | 13051  | 9    | 120059072 | 120078236 | -    |
| 14821 | 1433683_at   | Region | 9530027K23Rik | 77411  | 8    | 105427030 | 105432821 | -    |
| 14822 | 1424438_a_at | Region | Leprot        | 230514 | 4    | 100606688 | 100618263 | +    |
| 14823 | 1431293_a_at | Region | 1110019C08Rik | 224250 | 16   | 57715966  | 57722159  | +    |
| 14824 | 1443002_at   | Region | Zfr           | 22763  | 15   | 11948204  | 11996199  | +    |
| 14825 | 1416349_at   | Region | Mrpl34        | 94065  | 8    | 70614843  | 70615615  | +    |
| 14826 | 1426747_at   | Region | Abcf3         | 27406  | 16   | 19320803  | 19332961  | +    |
| 14827 | 1443008_at   | Region | Msi2h         | 76626  | 11   | 88067452  | 88208048  | -    |
| 14828 | 1460249_at   | Region | Lnx2          | 140887 | 5    | 145908796 | 145968222 | -    |
| 14829 | 1457522_at   | Region | 1110034C04Rik | 68734  | 12   | 96484976  | 96528858  | -    |
| 14830 | 1416015_s_at | Region | Abce1         | 24015  | 8    | 78898390  | 78925732  | -    |
| 14831 | 1460289_at   | Region | Nrg3          | 18183  | 14   | 36505478  | 36542277  | -    |
| 14832 | 1419866_s_at | Region | Sca2          | 20239  | 5    | 120898076 | 120967058 | +    |
| 14833 | 1449931_at   | Region | Cpeb4         | 67579  | 11   | 31767001  | 31826367  | +    |
| 14834 | 1426748_s_at | Region | Abcf3         | 27406  | 16   | 19320803  | 19332961  | +    |
| 14835 | 1456009_x_at | Region | Top3b         | 21976  | 16   | 15641732  | 15663698  | +    |
| 14836 | 1450044_at   | Region | Fzd7          | 14369  | 1    | 59785717  | 59790493  | +    |
| 14837 | 1432499_a_at | Region | Ube4b         | 63958  | 4    | 147820778 | 147919111 | -    |
| 14838 | 1426392_a_at | Region | Actr3         | 74117  | 1    | 125220868 | 125263588 | -    |
| 14839 | 1433482_a_at | Region | Fubp1         | 51886  | 3    | 151191900 | 151214173 | +    |
| 14840 | 1426655_a_at | Region | 4930504E06Rik | 75007  | 3    | 94770775  | 94783992  | +    |
| 14841 | 1429479_at   | Region | 6430590I03Rik | 76222  | 16   | 205454    | 207046    | -    |
| 14842 | 1448693_at   | Region | BC002216      | 79554  | 4    | 154357085 | 154361802 | -    |
| 14843 | 1436613_at   | Region | B930093C12Rik | 268445 | 11   | 77196147  | 77198731  | -    |
| 14844 | 1422901_at   | Region | Mgea5         | 76055  | 19   | 45297695  | 45330727  | -    |
| 14845 | 1457824_at   | Region | None          | None   | 9    | 92143523  | 92143854  | +    |
| 14846 | 1455914_at   | Region | AI987944      | 233168 | 7    | 35490664  | 35510152  | -    |
| 14847 | 1439526_at   | Region | None          | None   | 18   | 73999184  | 74000845  | -    |
| 14848 | 1436941_at   | Region | Gm1752        | 385658 | 16   | 3376808   | 3417077   | +    |
| 14849 | 1420879_a_at | Region | Ywhab         | 54401  | 2    | 163452166 | 163475556 | +    |
| 14850 | 1437334_x_at | Region | Parn          | 74108  | 16   | 12274917  | 12404322  | -    |
| 14851 | 1424150_at   | Region | Gdpd5         | 233552 | 7    | 93470011  | 93549440  | +    |
| 14852 | 1450312_at   | Region | Cdh20         | 23836  | 1    | 104825391 | 104886917 | +    |
| 14853 | 1418238_at   | Region | Ivd           | 56357  | 2    | 118375849 | 118395206 | +    |
| 14854 | 1451018_at   | Region | Leprot1       | 68192  | 8    | 32936611  | 32947770  | -    |
| 14855 | 1438132_at   | Region | C030005G22Rik | 402739 | 14   | 116933406 | 116934077 | -    |

|       |              |        |                   |        |    |           |           |   |
|-------|--------------|--------|-------------------|--------|----|-----------|-----------|---|
| 14856 | 1448119_at   | Region | Bpgm              | 12183  | 6  | 34570624  | 34599878  | + |
| 14857 | 1449121_at   | Region | Fusip1            | 14105  | 4  | 134737416 | 134751165 | + |
| 14858 | 1450824_at   | Region | Ptch1             | 19206  | 13 | 60894523  | 60948510  | - |
| 14859 | 1457532_at   | Region | Garnl1            | 56784  | 12 | 52323288  | 52540884  | - |
| 14860 | 1429140_at   | Region | 9830002I17Rik     | 77577  | 11 | 72223814  | 72275904  | - |
| 14861 | 1446029_at   | Region | None              | None   | 2  | 59562139  | 59562875  | + |
| 14862 | 1429210_at   | Region | Col23a1           | 237759 | 11 | 51042761  | 51333951  | + |
| 14863 | 1418779_at   | Region | Rce1              | 19671  | 19 | 4411341   | 4414407   | - |
| 14864 | 1442094_at   | Region | None              | None   | 1  | 93650453  | 93651051  | + |
| 14865 | 1449124_at   | Region | Rgl1              | 19731  | 1  | 152402014 | 152509595 | - |
| 14866 | 1436342_a_at | Region | D19ErtD721e       | 225896 | 19 | 8068106   | 8072203   | + |
| 14867 | 1435885_s_at | Region | Its1              | 16443  | 16 | 90939437  | 91069253  | + |
| 14868 | 1435051_at   | Region | Wdr44             | 72404  | X  | 21932006  | 22044942  | + |
| 14869 | 1441679_at   | Region | Cacna1c           | 12288  | 6  | 119025051 | 119540819 | - |
| 14870 | 1425496_at   | Region | Abca3             | 27410  | 17 | 22155713  | 22213193  | + |
| 14871 | 1434508_at   | Region | Ube2q             | 70093  | 3  | 89579799  | 89590178  | + |
| 14872 | 1460726_at   | Region | Adss              | 11566  | 1  | 177700835 | 177734173 | - |
| 14873 | 1426269_at   | Region | Sybl1             | 20955  | X  | 10737     | 39147     | - |
| 14874 | 1439415_x_at | Region | Rps21             | 66481  | 2  | 179974367 | 179975394 | + |
| 14875 | 1451753_at   | Region | Plxna2            | 18845  | 1  | 194358488 | 194552987 | + |
| 14876 | 1458500_at   | Region | AU021034          | 219170 | 14 | 72423456  | 72431439  | - |
| 14877 | 1431183_at   | Region | 1700066M21Rik     | 73467  | 1  | 57681353  | 57687348  | + |
| 14878 | 1421315_s_at | Region | Ctt1              | 13043  | 7  | 138848729 | 138882584 | - |
| 14879 | 1435176_a_at | Region | Id2               | 15902  | 12 | 21646605  | 21648874  | - |
| 14880 | 1456261_at   | Region | Sh3kbp1           | 58194  | X  | 153308006 | 153573572 | + |
| 14881 | 1448248_at   | Region | Crk               | 12928  | 11 | 75404968  | 75431752  | + |
| 14882 | 1427916_at   | Region | St7l              | 229681 | 3  | 104291995 | 104353941 | + |
| 14883 | 1424335_at   | Region | 8430432M10Rik     | 66812  | 9  | 57526299  | 57551131  | - |
| 14884 | 1438707_at   | Region | Atp13a4           | 224079 | 16 | 28184867  | 28337155  | - |
| 14885 | 1455979_at   | Region | Arid1b            | 239985 | 17 | 4902975   | 5250462   | + |
| 14886 | 1438008_at   | Region | Gga3              | 260302 | 11 | 115405804 | 115424978 | - |
| 14887 | 1430157_at   | Region | 1700095J03Rik     | 74293  | 7  | 103292083 | 103297768 | + |
| 14888 | 1436795_at   | Region | 9630058J23Rik     | 226744 | 1  | 179500775 | 179581719 | + |
| 14889 | 1424230_at   | Region | Sec15l1           | 107371 | 19 | 36893738  | 37026525  | + |
| 14890 | 1445656_at   | Region | None              | None   | 9  | 120195740 | 120196163 | + |
| 14891 | 1446220_at   | Region | Gm484             | 243967 | 7  | 39767950  | 39777898  | + |
| 14892 | 1420654_a_at | Region | Gbe1              | 74185  | 16 | 69381618  | 69637606  | + |
| 14893 | 1440227_at   | Region | BF642829          | 503859 | 16 | 91241568  | 91242565  | + |
| 14894 | 1450500_at   | Region | Uhm1              | 16589  | 1  | 170133433 | 170149570 | - |
| 14895 | 1454064_a_at | Region | Rnf138            | 56515  | 18 | 21216269  | 21243151  | + |
| 14896 | 1457719_at   | Region | None              | None   | 8  | 116491224 | 116492693 | - |
| 14897 | 1456735_x_at | Region | Acpl2             | 235534 | 9  | 96722701  | 96788780  | - |
| 14898 | 1416939_at   | Region | Pyp               | 67895  | 10 | 61614925  | 61640469  | + |
| 14899 | 1441593_at   | Region | Pten              | 19211  | 19 | 32083643  | 32146174  | + |
| 14900 | 1426777_a_at | Region | Wasl              | 73178  | 6  | 24663290  | 24714456  | - |
| 14901 | 1420956_at   | Region | Apc               | 11789  | 18 | 34484045  | 34541630  | + |
| 14902 | 1435381_at   | Region | 2610110G12Rik     | 73242  | 17 | 33619005  | 33629198  | - |
| 14903 | 1416815_s_at | Region | Bub3              | 12237  | 7  | 125876724 | 125888172 | + |
| 14904 | 1424731_at   | Region | Nle1              | 217011 | 11 | 82640430  | 82648030  | - |
| 14905 | 1437291_at   | Region | 2700081O15Rik     | 108899 | 19 | 7134873   | 7139385   | + |
| 14906 | 1444667_at   | Region | Brdt              | 114642 | 5  | 106401608 | 106456144 | + |
| 14907 | 1448738_at   | Region | Calb1             | 12307  | 4  | 15808229  | 15833613  | + |
| 14908 | 1415718_at   | Region | 2310079P12Rik     | 50724  | 11 | 57527266  | 57538710  | + |
| 14909 | 1436780_at   | Region | Ogt               | 108155 | X  | 96241425  | 96285710  | + |
| 14910 | 1436737_a_at | Region | Sorbs1            | 20411  | 19 | 39839082  | 40058071  | - |
| 14911 | 1429768_at   | Region | None              | None   | 18 | 23644049  | 23888215  | + |
|       |              |        | 2610005L07Rik /// |        |    |           |           |   |
| 14912 | 1437717_x_at | Region | LOC546041         | 381598 | 15 | 1398      | 8167      | + |
| 14913 | 1437789_at   | Region | Birc6             | 12211  | 17 | 72336066  | 72510856  | + |
| 14914 | 1440171_x_at | Region | BB026409          | 101901 | 7  | 23299621  | 23299846  | - |
| 14915 | 1425356_at   | Region | Zfp142            | 77264  | 1  | 74868909  | 74890473  | - |
| 14916 | 1425311_at   | Region | 4930432F04Rik     | 78792  | 5  | 138366782 | 138369744 | - |
| 14917 | 1429112_at   | Region | Tln2              | 70549  | 9  | 67349709  | 67668766  | - |
| 14918 | 1449239_at   | Region | 1700045I19Rik     | 74264  | X  | 157359545 | 157360734 | - |
| 14919 | 1435942_at   | Region | Kcnq2             | 16536  | 2  | 180792537 | 180852183 | - |

|       |              |        |                   |        |      |           |           |      |
|-------|--------------|--------|-------------------|--------|------|-----------|-----------|------|
| 14920 | 1422792_at   | Region | Pafah1b2          | 18475  | 9    | 45981441  | 45998071  | -    |
| 14921 | 1451020_at   | Region | Gsk3b             | 56637  | 16   | 36906890  | 37063968  | +    |
| 14922 | 1436841_at   | Region | B230380D07Rik     | 235461 | 9    | 70745120  | 70797683  | -    |
| 14923 | 1448909_a_at | Region | Mrpl39            | 27393  | 16   | 83827402  | 83845155  | -    |
| 14924 | 1426232_at   | Region | BC024479          | 235184 | 9    | 37430864  | 37465703  | +    |
| 14925 | 1436568_at   | Region | Jam2              | 67374  | 16   | 83882574  | 83932843  | +    |
| 14926 | 1426640_s_at | Region | Trib2             | 217410 | 12   | 15150515  | 15175525  | -    |
| 14927 | 1455034_at   | Region | Nr4a2             | 18227  | 2    | 57033695  | 57040794  | -    |
| 14928 | 1439912_at   | Region | 9430098F02Rik     | 103793 | 11   | 51880107  | 51880621  | +    |
| 14929 | 1457075_at   | Region | A830031M15Rik     | 102902 | NONE | NONE      | NONE      | NONE |
| 14930 | 1435136_at   | Region | Whsc1             | 107823 | 5    | 32363965  | 32365554  | +    |
| 14931 | 1453767_a_at | Region | Nt5m              | 103850 | 11   | 59573702  | 59602164  | +    |
| 14932 | 1453160_at   | Region | Thrap1            | 327987 | 11   | 85997437  | 86085517  | -    |
| 14933 | 1423926_at   | Region | Slc39a13          | 68427  | 2    | 90766540  | 90774970  | -    |
| 14934 | 1451179_a_at | Region | Qk                | 19317  | 17   | 8850890   | 8959849   | -    |
| 14935 | 1437466_at   | Region | Alcam             | 11658  | 16   | 51168811  | 51372049  | -    |
| 14936 | 1437048_x_at | Region | Stxbp2            | 20911  | 8    | 36313     | 47968     | +    |
| 14937 | 1446346_at   | Region | Adamts9           | 101401 | 6    | 93379900  | 93410347  | -    |
| 14938 | 1427064_a_at | Region | Scrib             | 105782 | 15   | 76095858  | 76118402  | -    |
| 14939 | 1443649_at   | Region | Ureb1             | 59026  | X    | 145349955 | 145350400 | +    |
| 14940 | 1444531_at   | Region | None              | None   | NONE | NONE      | NONE      | NONE |
| 14941 | 1451281_at   | Region | Zfp96             | 22758  | 13   | 20792934  | 20923192  | +    |
| 14942 | 1416586_at   | Region | Zfp239            | 22685  | 6    | 118294871 | 118304561 | +    |
| 14943 | 1438760_x_at | Region | Adam15            | 11490  | 3    | 89096372  | 89106699  | -    |
| 14944 | 1450519_a_at | Region | Prkaca            | 18747  | 8    | 83233159  | 83256577  | +    |
| 14945 | 1437187_at   | Region | E2f7              | 52679  | 10   | 110368316 | 110410221 | +    |
| 14946 | 1452720_a_at | Region | Fip11             | 66899  | 5    | 73370146  | 73431830  | +    |
| 14947 | 1428872_at   | Region | 4121402D02Rik     | 74026  | 11   | 98616603  | 98627514  | +    |
| 14948 | 1424286_at   | Region | Prkx              | 19108  | X    | 72422678  | 72456615  | -    |
| 14949 | 1436728_s_at | Region | Rtel1             | 269400 | 2    | 181036742 | 181073573 | +    |
| 14950 | 1425761_a_at | Region | Nfatc1            | 18018  | 18   | 80729557  | 80836410  | -    |
| 14951 | 1424053_a_at | Region | D8Ertd325e        | 66855  | 8    | 122748919 | 122778703 | +    |
| 14952 | 1423054_at   | Region | Wdr1              | 22388  | 5    | 37274667  | 37309449  | +    |
| 14953 | 1460255_at   | Region | Tnfsf13b          | 24099  | 8    | 9374137   | 9403504   | +    |
| 14954 | 1457204_at   | Region | Zdhhc2            | 70546  | 8    | 39367458  | 39428485  | +    |
| 14955 | 1456407_a_at | Region | Tlk1              | 228012 | 2    | 70410150  | 70523223  | -    |
| 14956 | 1425242_at   | Region | 1810006K21Rik     | 69038  | 19   | 9400138   | 9404273   | +    |
| 14957 | 1436874_x_at | Region | Slc25a5           | 11740  | X    | 31416206  | 31419360  | +    |
| 14958 | 1442026_at   | Region | None              | None   | 9    | 48679581  | 48680488  | -    |
| 14959 | 1433956_at   | Region | Cdh5              | 12562  | 8    | 103396382 | 103438830 | +    |
| 14960 | 1437950_at   | Region | BC035537          | 212326 | 8    | 44287329  | 44330422  | -    |
| 14961 | 1449074_at   | Region | Kcnk4             | 16528  | 19   | 6639538   | 6648363   | -    |
| 14962 | 1427558_s_at | Region | Alg12             | 223774 | 15   | 88857174  | 88871213  | -    |
| 14963 | 1456662_at   | Region | None              | None   | 8    | 46643401  | 46643598  | +    |
| 14964 | 1419055_a_at | Region | Ptpn21            | 24000  | 12   | 94103584  | 94161513  | -    |
| 14965 | 1449317_at   | Region | Cflar             | 12633  | 1    | 59018187  | 59060035  | +    |
| 14966 | 1436708_x_at | Region | Mcm4              | 17217  | 16   | 14393171  | 14406424  | -    |
| 14967 | 1434697_at   | Region | 1110001P04Rik     | 76296  | 9    | 44628613  | 44629587  | +    |
| 14968 | 1436252_at   | Region | Dnb5              | 242773 | 4    | 149120934 | 149144527 | -    |
| 14969 | 1419652_s_at | Region | 2610200G18Rik     | 67149  | NONE | NONE      | NONE      | NONE |
| 14970 | 1451756_at   | Region | Flt1              | 14254  | 5    | 146453691 | 146617483 | -    |
| 14971 | 1419384_at   | Region | Prkcabp           | 18693  | 15   | 79281099  | 79300746  | +    |
|       |              |        | 6330442E10Rik /// |        |      |           |           |      |
| 14972 | 1457254_x_at | Region | LOC432460         | 268567 | 12   | 75818785  | 75863926  | -    |
| 14973 | 1421239_at   | Region | Il6st             | 16195  | 13   | 108856634 | 108899366 | +    |
| 14974 | 1438081_at   | Region | None              | None   | 18   | 44644561  | 44645426  | -    |
| 14975 | 1452699_at   | Region | D14Ertd209e       | 52535  | 14   | 46979197  | 46986291  | +    |
| 14976 | 1439504_s_at | Region | Zfp28             | 22690  | 7    | 5579089   | 5591525   | +    |
| 14977 | 1446192_at   | Region | Amph              | 218038 | 13   | 18423821  | 18627334  | +    |
| 14978 | 1416774_at   | Region | Wee1              | 22390  | 7    | 103974933 | 103996157 | +    |
| 14979 | 1455578_x_at | Region | Rpl41             | 67945  | 10   | 128285207 | 128286206 | -    |
| 14980 | 1433470_a_at | Region | Immt              | 76614  | 6    | 72203510  | 72209365  | +    |
| 14981 | 1460395_at   | Region | Nudcd3            | 209586 | 11   | 6000493   | 6094949   | -    |
| 14982 | 1455033_at   | Region | B430201A12Rik     | 329739 | 3    | 108768194 | 108823063 | -    |
| 14983 | 1458861_at   | Region | None              | None   | 6    | 112065505 | 112070019 | +    |

|                    |              |        |               |        |      |           |           |      |
|--------------------|--------------|--------|---------------|--------|------|-----------|-----------|------|
| 14984              | 1449003_a_at | Region | Vti1b         | 53612  | 12   | 76012660  | 76028779  | -    |
| 14985              | 1424779_at   | Region | D10Ucla1      | 28193  | 10   | 67048137  | 67134030  | -    |
| 14986              | 1418125_at   | Region | 4632409L19Rik | 68142  | 2    | 118886894 | 118947183 | -    |
| 14987              | 1425276_at   | Region | Fbs1          | 14123  | 7    | 121534337 | 121540615 | +    |
| 14988              | 1423060_at   | Region | Pa2g4         | 18813  | 10   | 128295733 | 128303038 | -    |
| 14989              | 1440890_a_at | Region | None          | None   | 9    | 22133399  | 22133751  | +    |
| 14990              | 1441535_at   | Region | Mlit3         | 70122  | 4    | 86758854  | 87019463  | -    |
| 14991              | 1460170_at   | Region | Ext2          | 14043  | 2    | 93400316  | 93527228  | -    |
| 14992              | 1439246_x_at | Region | Tnrc6a        | 233833 | 7    | 117180427 | 117250357 | +    |
| 14993              | 1420650_at   | Region | Atbf1         | 11906  | 8    | 108012331 | 108254925 | +    |
| 14994              | 1453763_at   | Region | Txndc11       | 106200 | 16   | 10508059  | 10567680  | +    |
| Rpl5 /// LOC545265 |              |        |               |        |      |           |           |      |
| /// LOC545304 ///  |              |        |               |        |      |           |           |      |
| LOC545478 ///      |              |        |               |        |      |           |           |      |
| 14995              | 1423666_s_at | Region | LOC545858     | 19983  | 5    | 106971039 | 106978499 | +    |
| 14996              | 1456140_at   | Region | Zic5          | 65100  | 14   | 117028709 | 117035237 | -    |
| 14997              | 1418150_at   | Region | Mtmr4         | 170749 | 11   | 87320209  | 87344288  | +    |
| 14998              | 1453827_at   | Region | 1110035H17Rik | 68686  | 7    | 24567089  | 24568328  | +    |
| 14999              | 1434760_at   | Region | Lrrtm3        | 216028 | 10   | 63866884  | 64028642  | -    |
| 15000              | 1439559_at   | Region | 1700040D17Rik | 76602  | 3    | 93897218  | 93900934  | -    |
| 15001              | 1438762_at   | Region | None          | None   | 9    | 72231020  | 72231565  | -    |
| 15002              | 1451792_a_at | Region | Pja1          | 18744  | X    | 94067507  | 94072041  | -    |
| 15003              | 1428196_a_at | Region | 1200015F23Rik | 67809  | 2    | 118650852 | 118681688 | -    |
| 15004              | 1434320_at   | Region | Gtf3c4        | 269252 | 2    | 28757737  | 28772448  | -    |
| 15005              | 1454956_at   | Region | Rps6kb1       | 72508  | 11   | 86241975  | 86272766  | -    |
| 15006              | 1432364_at   | Region | 4930556N13Rik | 75285  | 11   | 88672691  | 88702483  | +    |
| 15007              | 1442436_at   | Region | Fn3k          | 63828  | 11   | 121256061 | 121271577 | +    |
| 15008              | 1452582_at   | Region | Galm          | 319625 | 17   | 77944865  | 78002426  | +    |
| 15009              | 1440911_at   | Region | Col23a1       | 237759 | 11   | 51042761  | 51333951  | +    |
| 15010              | 1429178_at   | Region | Odz3          | 23965  | 8    | 47191599  | 47638956  | -    |
| 15011              | 1418981_at   | Region | Casp12        | 12364  | 9    | 5255895   | 5283427   | +    |
| 15012              | 1417640_at   | Region | Cd79b         | 15985  | 11   | 106132430 | 106135759 | -    |
| 15013              | 1426133_a_at | Region | 1500032H18Rik | 69028  | 1    | 38169275  | 38184881  | -    |
| 15014              | 1429055_at   | Region | 4930506M07Rik | 71653  | 19   | 58572915  | 58675626  | -    |
| 15015              | 1423357_at   | Region | 2610209A20Rik | 67164  | 7    | 94265949  | 94268037  | +    |
| 15016              | 1436007_a_at | Region | Thumpd1       | 233802 | 7    | 113590660 | 113596332 | -    |
| 15017              | 1418567_a_at | Region | Srp14         | 20813  | 2    | 117989699 | 117993510 | -    |
| 15018              | 1420920_a_at | Region | Arf1          | 11840  | 11   | 58937042  | 58939152  | -    |
| 15019              | 1439426_x_at | Region | Lzp-s         | 17110  | 10   | 116977248 | 116982319 | -    |
| 15020              | 1453238_s_at | Region | E430024C06Rik | 319443 | NONE | NONE      | NONE      | NONE |
| 15021              | 1460001_at   | Region | Pgpep1        | 66522  | 8    | 69805459  | 69816029  | -    |
| 15022              | 1418715_at   | Region | Pank1         | 75735  | 19   | 34154273  | 34221296  | -    |
| 15023              | 1452181_at   | Region | Ckap4         | 216197 | 10   | 84420966  | 84428436  | -    |
| 15024              | 1426477_at   | Region | Rasa1         | 218397 | 13   | 81307760  | 81348198  | -    |
| 15025              | 1428844_a_at | Region | Bclaf1        | 72567  | 10   | 20239740  | 20267469  | +    |
| 15026              | 1445160_at   | Region | Nav3          | 260315 | 10   | 109569106 | 109718861 | -    |
| 15027              | 1426002_a_at | Region | Cdc7          | 12545  | 5    | 106027461 | 106047570 | +    |
| 15028              | 1454771_at   | Region | None          | None   | 12   | 97413512  | 97421587  | -    |
| 15029              | 1418259_a_at | Region | Entpd2        | 12496  | 2    | 25328120  | 25333480  | +    |
| 15030              | 1447961_s_at | Region | Mrpl38        | 60441  | 11   | 115952914 | 115959871 | -    |
| 15031              | 1423805_at   | Region | Dab2          | 13132  | 15   | 6175647   | 6229535   | +    |
| 15032              | 1439577_at   | Region | None          | None   | NONE | NONE      | NONE      | NONE |
| 15033              | 1438210_at   | Region | Gpr149        | 229357 | 3    | 62196472  | 62270897  | -    |
| 15034              | 1459807_x_at | Region | 4933406E20Rik | 74443  | 9    | 108627920 | 108646375 | -    |
| 15035              | 1440116_at   | Region | D630045J12Rik | 330286 | 6    | 38261271  | 38390218  | -    |
| 15036              | 1442920_at   | Region | Klf3          | 16599  | 5    | 63601098  | 63627704  | +    |
| 15037              | 1435053_s_at | Region | Plekhh1       | 211945 | 12   | 75867965  | 75938050  | +    |
| 15038              | 1441137_at   | Region | Bicc1         | 83675  | 10   | 70979053  | 71213601  | -    |
| 15039              | 1445562_at   | Region | Zbtb16        | 235320 | 9    | 48684510  | 48863820  | -    |
| 15040              | 1439894_at   | Region | A730056I06Rik | 319521 | NONE | NONE      | NONE      | NONE |
| 15041              | 1415853_at   | Region | Def8          | 23854  | 8    | 122817883 | 122838796 | +    |
| 15042              | 1419325_at   | Region | Nmu           | 56183  | 5    | 75578734  | 75609016  | -    |
| 15043              | 1428618_at   | Region | 1700129L13Rik | 67933  | 10   | 82611323  | 82629097  | +    |
| 15044              | 1444042_at   | Region | Trip11        | 109181 | 12   | 97280506  | 97358629  | -    |

|       |              |        |               |        |    |           |           |   |
|-------|--------------|--------|---------------|--------|----|-----------|-----------|---|
| 15045 | 1437357_at   | Region | Ythdc2        | 240255 | 18 | 45048187  | 45109220  | + |
| 15046 | 1424763_at   | Region | 1700027N10Rik | 75564  | 17 | 43639198  | 43654119  | - |
| 15047 | 1415880_a_at | Region | Lamp1         | 16783  | 8  | 12537914  | 12553973  | + |
| 15048 | 1416284_at   | Region | Mrpl28        | 68611  | 17 | 23916702  | 23919783  | + |
| 15049 | 1427163_at   | Region | Ubr2          | 224826 | 17 | 44441356  | 44523334  | - |
| 15050 | 1422564_at   | Region | Actl6b        | 83766  | 5  | 136504421 | 136520439 | + |
| 15051 | 1453787_at   | Region | D2Bwg1356e    | 52837  | 2  | 134108354 | 134157974 | - |
| 15052 | 1435963_at   | Region | Sema5b        | 20357  | 16 | 34397801  | 34447067  | + |
| 15053 | 1457848_at   | Region | A930016P21Rik | 68073  | 15 | 31602722  | 31618141  | + |
| 15054 | 1435970_at   | Region | Nlk           | 18099  | 11 | 78292827  | 78423032  | - |
| 15055 | 1426875_s_at | Region | Srxn1         | 76650  | 2  | 151562666 | 151568289 | + |
| 15056 | 1459909_at   | Region | Nfix          | 18032  | 8  | 83974112  | 84039256  | - |
| 15057 | 1437879_at   | Region | AU045404      | 380959 | 15 | 90277186  | 90329435  | + |
| 15058 | 1428315_at   | Region | Ebna1bp2      | 69072  | 4  | 117579721 | 117586679 | + |
| 15059 | 1428842_a_at | Region | Ngfrap1       | 12070  | X  | 129815282 | 129816905 | + |
| 15060 | 1428402_at   | Region | Zcchc3        | 67917  | 2  | 151869891 | 151871963 | - |
| 15061 | 1456046_at   | Region | C1qr1         | 17064  | 2  | 147893588 | 147900480 | - |
| 15062 | 1447159_at   | Region | None          | None   | 12 | 72716693  | 72717203  | + |
| 15063 | 1458381_at   | Region | Clic5         | 224796 | 17 | 41693345  | 41782570  | + |
| 15064 | 1440543_at   | Region | D930036F22Rik | 320487 | 12 | 48628093  | 48722896  | - |
| 15065 | 1452306_at   | Region | Zfyve26       | 211978 | 12 | 76088750  | 76155295  | - |
| 15066 | 1427418_a_at | Region | Hif1a         | 15251  | 12 | 70756396  | 70795257  | + |
| 15067 | 1417908_s_at | Region | Ube2l3        | 22195  | 16 | 15923031  | 15972515  | - |
| 15068 | 1422053_at   | Region | Inhba         | 16323  | 13 | 15463482  | 15476441  | + |
| 15069 | 1452831_s_at | Region | Ppat          | 231327 | 5  | 76158008  | 76196037  | - |
| 15070 | 1435993_at   | Region | AI841875      | 105219 | 13 | 20964875  | 20965568  | + |
| 15071 | 1429177_x_at | Region | Sox17         | 20671  | 1  | 4451317   | 4456802   | - |
| 15072 | 1426610_a_at | Region | Ttf1          | 22130  | 2  | 28992439  | 29019268  | + |
| 15073 | 1422969_s_at | Region | Ihpk1         | 27399  | 9  | 108070635 | 108116769 | + |
| 15074 | 1459349_at   | Region | A930011G23Rik | 319818 | 5  | 98315387  | 98751358  | - |
| 15075 | 1459632_at   | Region | Crim1         | 50766  | 17 | 76085677  | 76086109  | + |
| 15076 | 1458623_at   | Region | None          | None   | 17 | 43951118  | 43951549  | - |
| 15077 | 1443012_at   | Region | Tcf12         | 21406  | 9  | 71980605  | 72246476  | - |
| 15078 | 1437261_at   | Region | None          | None   | 13 | 77832696  | 77833441  | + |
| 15079 | 1438755_at   | Region | C80068        | 97810  | 12 | 108529861 | 108530486 | + |
| 15080 | 1457148_at   | Region | Csmd2         | 329942 | 4  | 127374143 | 127591281 | + |
| 15081 | 1446426_at   | Region | Enah          | 13800  | 1  | 181864370 | 181978518 | - |
| 15082 | 1420643_at   | Region | Lfng          | 16848  | 5  | 139606194 | 139613318 | + |
| 15083 | 1417130_s_at | Region | Angptl4       | 57875  | 17 | 31474204  | 31480810  | - |
| 15084 | 1436541_at   | Region | 2310008H09Rik | 66356  | 7  | 112721617 | 112732114 | - |
| 15085 | 1451545_at   | Region | Tdrd3         | 219249 | 14 | 81829185  | 81957574  | + |
| 15086 | 1460742_at   | Region | Alg3          | 208624 | 16 | 19377613  | 19382885  | - |
| 15087 | 1433792_at   | Region | Nrip2         | 60345  | 6  | 129089953 | 129098438 | + |
|       |              |        | Ceacam1 ///   |        |    |           |           |   |
| 15088 | 1422123_s_at | Region | Ceacam2       | 26365  | 7  | 20682164  | 20703996  | - |
| 15089 | 1435930_at   | Region | Zfp291        | 244891 | 9  | 55662849  | 56048009  | - |
| 15090 | 1419416_a_at | Region | Rarg          | 19411  | 15 | 102294300 | 102316638 | - |
| 15091 | 1459307_at   | Region | Sec24b        | 99683  | 3  | 128916056 | 128993778 | - |
| 15092 | 1454855_at   | Region | Magi2         | 50791  | 5  | 18347411  | 19110332  | + |
| 15093 | 1453045_at   | Region | 4921537D05Rik | 77048  | 10 | 94662974  | 94764320  | + |
| 15094 | 1454843_at   | Region | Prps2         | 110639 | X  | 160945738 | 160982104 | - |
| 15095 | 1436842_at   | Region | B230380D07Rik | 235461 | 9  | 70745120  | 70797683  | - |
| 15096 | 1428613_at   | Region | Ldhd          | 52815  | 8  | 110923860 | 110927911 | - |
| 15097 | 1452681_at   | Region | Dtymk         | 21915  | 1  | 93630666  | 93632046  | - |
| 15098 | 1422235_at   | Region | Htr7          | 15566  | 19 | 35302942  | 35400012  | - |
| 15099 | 1435968_at   | Region | None          | None   | 12 | 113040573 | 113041796 | + |
| 15100 | 1449438_at   | Region | Dpm1          | 13480  | 2  | 167717793 | 167739104 | - |
| 15101 | 1441946_at   | Region | Itih5         | 209378 | 2  | 10069730  | 10167804  | + |
| 15102 | 1426118_a_at | Region | Tomn40        | 53333  | 7  | 16570562  | 16584500  | - |
| 15103 | 1420888_at   | Region | Bcl2l1        | 12048  | 2  | 152237604 | 152288618 | - |
| 15104 | 1453498_x_at | Region | Steap3        | 68428  | 1  | 119985615 | 120002678 | - |
| 15105 | 1452870_at   | Region | Apaf1         | 11783  | 10 | 90961928  | 91054028  | - |
| 15106 | 1454608_x_at | Region | Ttr           | 22139  | 18 | 20880341  | 20889247  | + |
| 15107 | 1433563_s_at | Region | Derl1         | 67819  | 15 | 57878521  | 57901434  | - |
| 15108 | 1416506_at   | Region | Psma6         | 26443  | 12 | 52119691  | 52139243  | + |

|       |              |        |               |        |      |           |           |      |
|-------|--------------|--------|---------------|--------|------|-----------|-----------|------|
| 15109 | 1423683_at   | Region | Cdca4         | 71963  | 12   | 108296070 | 108305225 | -    |
| 15110 | 1460455_at   | Region | 1110059H15Rik | 68795  | 2    | 69802617  | 69879409  | +    |
| 15111 | 1435770_at   | Region | D2Bwg1356e    | 52837  | 2    | 134108354 | 134157974 | -    |
| 15112 | 1451409_at   | Region | 2210021J22Rik | 72355  | 15   | 85855615  | 85860302  | -    |
| 15113 | 1453662_at   | Region | B230205O20Rik | 77413  | 1    | 172110653 | 172111993 | +    |
| 15114 | 1444415_at   | Region | Smarcd3       | 66993  | 5    | 23056519  | 23086151  | -    |
| 15115 | 1435357_at   | Region | D4Wsu53e      | 27981  | 4    | 133884543 | 133888276 | +    |
| 15116 | 1428754_at   | Region | 3300001M20Rik | 66926  | 2    | 132318068 | 132329908 | -    |
| 15117 | 1427221_at   | Region | MGI:2143217   | 102680 | 9    | 123659826 | 123702549 | -    |
| 15118 | 1416289_at   | Region | Plod1         | 18822  | 4    | 146402423 | 146429066 | -    |
| 15119 | 1415915_at   | Region | Ddx1          | 104721 | 12   | 12580692  | 12609750  | -    |
| 15120 | 1444862_at   | Region | None          | None   | 14   | 20792584  | 20793577  | +    |
| 15121 | 1434031_at   | Region | Zfp692        | 103836 | 11   | 58032732  | 58040239  | +    |
| 15122 | 1434937_at   | Region | Phr1          | 105689 | 14   | 97658865  | 97891435  | -    |
| 15123 | 1440384_at   | Region | Tmcc1         | 330401 | 6    | 116456153 | 116631023 | -    |
| 15124 | 1430408_at   | Region | Cacna1a       | 12286  | 8    | 83678856  | 83903623  | +    |
| 15125 | 1454831_at   | Region | 3230402J05Rik | 108784 | 8    | 36569453  | 36572130  | +    |
| 15126 | 1456312_x_at | Region | Gsn           | 227753 | 2    | 35214602  | 35240054  | +    |
| 15127 | 1417517_at   | Region | Plagl2        | 54711  | 2    | 152684705 | 152698294 | -    |
| 15128 | 1422900_at   | Region | Mgea5         | 76055  | 19   | 45297695  | 45330727  | -    |
| 15129 | 1447220_at   | Region | 1700125H20Rik | 73634  | 11   | 84899088  | 84909137  | +    |
| 15130 | 1429573_at   | Region | 4921520P21Rik | 70887  | X    | 97504587  | 97510052  | -    |
| 15131 | 1426351_at   | Region | Hspd1         | 15510  | 1    | 55378992  | 55389004  | -    |
| 15132 | 1420386_at   | Region | Seh1l         | 72124  | 18   | 68005761  | 68023379  | +    |
| 15133 | 1444753_at   | Region | Nek7          | 59125  | 1    | 138334093 | 138469075 | -    |
| 15134 | 1448273_at   | Region | Gss           | 14854  | 2    | 155020120 | 155044513 | -    |
| 15135 | 1417331_a_at | Region | Arl6          | 56297  | 16   | 58597575  | 58621129  | -    |
| 15136 | 1439377_x_at | Region | Cdc20         | 107995 | 4    | 117391806 | 117396154 | -    |
| 15137 | 1460724_at   | Region | Ap2a1         | 11771  | 7    | 38976114  | 39005954  | -    |
| 15138 | 1420986_s_at | Region | Kif3b         | 16569  | 2    | 152748365 | 152789150 | +    |
| 15139 | 1436072_at   | Region | None          | None   | NONE | NONE      | NONE      | NONE |
| 15140 | 1416756_at   | Region | Dnajb1        | 81489  | 8    | 82866135  | 82869845  | +    |
| 15141 | 1450111_a_at | Region | Nudt8         | 66387  | 19   | 3789370   | 3790892   | +    |
| 15142 | 1456210_at   | Region | None          | None   | 2    | 6015766   | 6016580   | -    |
| 15143 | 1417239_at   | Region | Cetn3         | 12626  | 13   | 77863539  | 77877404  | +    |
| 15144 | 1434016_at   | Region | Znrf2         | 387524 | 6    | 54961241  | 55034061  | +    |
| 15145 | 1434587_x_at | Region | Ptdss2        | 27388  | 7    | 135533273 | 135558141 | +    |
| 15146 | 1444144_at   | Region | 5530400K22Rik | 74501  | 16   | 43060418  | 43061044  | +    |
| 15147 | 1419111_at   | Region | Ing1l         | 69260  | 8    | 46633720  | 46641700  | -    |
| 15148 | 1436977_at   | Region | None          | None   | 6    | 138378338 | 138379100 | -    |
| 15149 | 1437108_at   | Region | Lsm6          | 78651  | 8    | 21699568  | 21713205  | -    |
| 15150 | 1451568_at   | Region | A630054L15Rik | 211922 | 14   | 24675766  | 24724614  | +    |
| 15151 | 1416331_a_at | Region | Nfe2l1        | 18023  | 11   | 96638518  | 96649042  | -    |
| 15152 | 1457454_at   | Region | Usp47         | 74996  | 7    | 105876643 | 105964517 | +    |
| 15153 | 1434928_at   | Region | Gas2l1        | 78926  | 11   | 4954212   | 4959638   | -    |
| 15154 | 1417114_at   | Region | Gcl           | 23885  | 6    | 87126075  | 87167665  | -    |
| 15155 | 1459526_at   | Region | None          | None   | NONE | NONE      | NONE      | NONE |
| 15156 | 1425864_a_at | Region | Sorcs1        | 58178  | 19   | 49701709  | 50229374  | -    |
| 15157 | 1429125_at   | Region | Zbtb9         | 474156 | 17   | 24768242  | 24771266  | +    |
| 15158 | 1447240_at   | Region | None          | None   | NONE | NONE      | NONE      | NONE |
| 15159 | 1448417_at   | Region | Ninj1         | 18081  | 13   | 48787060  | 48795764  | +    |
| 15160 | 1449731_s_at | Region | None          | None   | 12   | 52209583  | 52210002  | -    |
| 15161 | 1425705_a_at | Region | Ero1b         | 67475  | 13   | 203       | 5259      | -    |
| 15162 | 1422984_at   | Region | None          | None   | 5    | 13659986  | 13674277  | -    |
| 15163 | 1419305_a_at | Region | Fbxo36        | 66153  | 1    | 33563905  | 33564395  | -    |
| 15164 | 1423673_at   | Region | Ldoc1l        | 223732 | 15   | 84601998  | 84606382  | -    |
| 15165 | 1456042_s_at | Region | Tce4          | 57354  | 17   | 22767137  | 22821669  | -    |
| 15166 | 1442032_at   | Region | BC030500      | 234290 | 8    | 57944453  | 57946996  | +    |
| 15167 | 1429096_at   | Region | 2810455D13Rik | 72810  | 19   | 22967599  | 22969773  | +    |
| 15168 | 1427085_at   | Region | 2810432D09Rik | 69961  | 4    | 41850885  | 41852358  | -    |
| 15169 | 1442700_at   | Region | Pde4b         | 18578  | 4    | 101213908 | 101564744 | +    |
| 15170 | 1429477_at   | Region | D15Ertd785e   | 52683  | 15   | 89408645  | 89425699  | +    |
| 15171 | 1431507_a_at | Region | Synj2bp       | 24071  | 12   | 78359200  | 78394057  | -    |
| 15172 | 1426825_at   | Region | Fmnl3         | 22379  | 15   | 99375027  | 99428271  | -    |
| 15173 | 1436359_at   | Region | None          | None   | 6    | 118584313 | 118585075 | -    |



|       |              |        |               |        |      |           |           |      |
|-------|--------------|--------|---------------|--------|------|-----------|-----------|------|
| 15174 | 1452247_at   | Region | Fxr1h         | 14359  | 3    | 33467491  | 33516721  | +    |
| 15175 | 1450644_at   | Region | Zfp3611       | 12192  | 12   | 76968689  | 76973942  | -    |
| 15176 | 1429458_at   | Region | 2410127L17Rik | 67383  | 19   | 17917778  | 17951174  | +    |
| 15177 | 1454730_at   | Region | 4932414K18Rik | 231225 | 5    | 42932234  | 42949515  | -    |
| 15178 | 1435711_at   | Region | None          | None   | 5    | 122286867 | 122287489 | -    |
| 15179 | 1456898_at   | Region | Pura          | 19290  | 18   | 36504827  | 36511914  | +    |
| 15180 | 1452708_a_at | Region | Luc7l         | 66978  | 17   | 24046121  | 24075138  | +    |
| 15181 | 1440882_at   | Region | Lrp8          | 16975  | 4    | 106761166 | 106833072 | +    |
| 15182 | 1448333_at   | Region | Adprh         | 11544  | 16   | 37262216  | 37270966  | -    |
| 15183 | 1425490_a_at | Region | Wdr13         | 73447  | X    | 6362274   | 6371378   | -    |
| 15184 | 1453607_at   | Region | Mfap3l        | 71306  | 8    | 59692537  | 59709342  | +    |
| 15185 | 1421844_at   | Region | None          | None   | 16   | 25368195  | 25504104  | +    |
| 15186 | 1416583_at   | Region | Bad           | 12015  | 19   | 6655703   | 6665741   | +    |
| 15187 | 1453182_a_at | Region | 4122402O22Rik | 77626  | 16   | 16390322  | 16414351  | +    |
| 15188 | 1420878_a_at | Region | Ywhab         | 54401  | 2    | 163452166 | 163475556 | +    |
| 15189 | 1428125_at   | Region | 4921506J03Rik | 382423 | 10   | 112606837 | 112607555 | -    |
| 15190 | 1429415_at   | Region | Prkcbp1       | 228880 | 2    | 165242034 | 165353683 | -    |
| 15191 | 1448699_at   | Region | Mrpl54        | 66047  | 10   | 81400852  | 81403056  | -    |
| 15192 | 1419666_x_at | Region | Nupr1         | 56312  | 7    | 120672977 | 120675201 | -    |
| 15193 | 1416915_at   | Region | Msh6          | 17688  | 17   | 85834231  | 85850210  | +    |
| 15194 | 1443751_at   | Region | None          | None   | NONE | NONE      | NONE      | NONE |
| 15195 | 1422008_a_at | Region | Aqp3          | 11828  | 4    | 41231657  | 41237029  | -    |
| 15196 | 1456789_at   | Region | Zfp462        | 242466 | 4    | 54936056  | 54997483  | +    |
| 15197 | 1455499_at   | Region | Nrxn2         | 18190  | 19   | 6319521   | 6322577   | +    |
| 15198 | 1425932_a_at | Region | Cugbp1        | 13046  | 2    | 90645207  | 90721804  | +    |
| 15199 | 1451318_a_at | Region | Lyn           | 17096  | 4    | 3605271   | 3718758   | +    |
| 15200 | 1456378_s_at | Region | Fbxl20        | 72194  | 11   | 97909793  | 97970681  | -    |
|       |              |        | LOC238535 /// |        |      |           |           |      |
| 15201 | 1444584_at   | Region | 4921509E05Rik | 238535 | 13   | 20903256  | 20903692  | -    |
|       |              |        | Plscr1 ///    |        |      |           |           |      |
| 15202 | 1429527_a_at | Region | LOC433328     | 22038  | 9    | 92150623  | 92163255  | +    |
| 15203 | 1436294_at   | Region | Ankrd29       | 225187 | 18   | 12441557  | 12493433  | -    |
| 15204 | 1429139_at   | Region | Za20d1        | 229603 | 3    | 95647489  | 95648962  | +    |
| 15205 | 1421362_a_at | Region | Frk           | 14302  | 10   | 34545676  | 34672847  | +    |
| 15206 | 1430989_a_at | Region | 1700020I14Rik | 66602  | 2    | 119108145 | 119117748 | +    |
| 15207 | 1423007_a_at | Region | Gfra2         | 14586  | 14   | 65206370  | 65294008  | +    |
| 15208 | 1417421_at   | Region | S100a1        | 20193  | 3    | 90321818  | 90325979  | -    |
| 15209 | 1454136_a_at | Region | 4921524J17Rik | 66714  | 8    | 84681533  | 84705607  | -    |
| 15210 | 1416757_at   | Region | Zmilch        | 68014  | 9    | 64258125  | 64293684  | -    |
| 15211 | 1428511_at   | Region | Phkg2         | 68961  | 7    | 121623135 | 121633036 | +    |
| 15212 | 1442029_at   | Region | Kcnq1         | 16535  | 7    | 137520467 | 137840061 | +    |
| 15213 | 1454685_at   | Region | None          | None   | 5    | 138392661 | 138393907 | +    |
| 15214 | 1439952_at   | Region | 3110082M05Rik | 73226  | 15   | 98719129  | 98719698  | -    |
| 15215 | 1439330_at   | Region | D230040J21Rik | 320216 | 5    | 149621768 | 149622304 | +    |
| 15216 | 1440690_at   | Region | None          | None   | 15   | 8173777   | 8174403   | -    |
| 15217 | 1454014_a_at | Region | Mkks          | 59030  | 2    | 136387917 | 136405031 | -    |
| 15218 | 1416812_at   | Region | Tia1          | 21841  | 6    | 86837265  | 86854216  | +    |
| 15219 | 1440262_at   | Region | Al854107      | 102623 | 9    | 27249246  | 27250532  | +    |
| 15220 | 1435530_at   | Region | Camsap1       | 227634 | 2    | 25860417  | 25927345  | -    |
| 15221 | 1425321_a_at | Region | Clmn          | 94040  | 12   | 100215893 | 100309212 | -    |
| 15222 | 1456308_x_at | Region | Trim28        | 21849  | 7    | 11017842  | 11024710  | +    |
| 15223 | 1452776_a_at | Region | 6330412F12Rik | 53312  | 5    | 23149873  | 23174275  | +    |
| 15224 | 1451988_s_at | Region | Chmp4b        | 75608  | 2    | 154114001 | 154151720 | +    |
| 15225 | 1452922_at   | Region | Ppp1r3d       | 228966 | 2    | 178130326 | 178131165 | -    |
| 15226 | 1451562_at   | Region | BC006662      | 223267 | 14   | 117455920 | 117465563 | -    |
| 15227 | 1450376_at   | Region | Mxi1          | 17859  | 19   | 52878345  | 52941221  | +    |
| 15228 | 1417848_at   | Region | MGI:2180715   | 170753 | 3    | 9425289   | 9606906   | -    |
| 15229 | 1428826_at   | Region | Nr6a1         | 14536  | 2    | 38655532  | 38859850  | -    |
| 15230 | 1426985_s_at | Region | 2810485I05Rik | 72826  | 9    | 13664776  | 13683571  | +    |
| 15231 | 1447264_at   | Region | Rab11fip1     | 75767  | 8    | 25872507  | 25907865  | -    |
| 15232 | 1421529_a_at | Region | Txnrd1        | 50493  | 10   | 82746224  | 82784757  | +    |
| 15233 | 1435827_at   | Region | 4933404O12Rik | 66752  | 5    | 135949114 | 135950263 | +    |
| 15234 | 1453949_s_at | Region | Lypla1        | 18777  | 1    | 4768285   | 4807127   | +    |
| 15235 | 1457995_at   | Region | F730014I05Rik | 228866 | 2    | 164336101 | 164348170 | +    |
| 15236 | 1436247_at   | Region | 4632419I22Rik | 74038  | 11   | 85938650  | 85939941  | -    |

|       |              |        |               |        |      |           |           |      |
|-------|--------------|--------|---------------|--------|------|-----------|-----------|------|
| 15237 | 1442811_at   | Region | Rgmb          | 68799  | 17   | 13809790  | 13830123  | -    |
| 15238 | 1440124_at   | Region | B230334C09Rik | 319537 | 3    | 157081963 | 157082492 | -    |
| 15239 | 1425635_at   | Region | Tnk1          | 83813  | 11   | 69576757  | 69584375  | -    |
| 15240 | 1416654_at   | Region | Slc31a2       | 20530  | 4    | 61377636  | 61389602  | +    |
| 15241 | 1455381_at   | Region | 4921513D23Rik | 320675 | 16   | 12845006  | 12845681  | -    |
| 15242 | 1456159_at   | Region | 2900045N06Rik | 72895  | 6    | 113640716 | 113716498 | +    |
| 15243 | 1437984_x_at | Region | Bat1a         | 53817  | 17   | 32946813  | 32958600  | +    |
| 15244 | 1455083_at   | Region | Al315324      | 102887 | X    | 54977735  | 54978667  | -    |
| 15245 | 1449845_a_at | Region | Ephb4         | 13846  | 5    | 136301023 | 136325355 | +    |
| 15246 | 1428843_at   | Region | 38416         | 69104  | 19   | 99847336  | 99848552  | -    |
| 15247 | 1453048_at   | Region | Nhlrc2        | 66866  | 19   | 56133809  | 56184394  | +    |
| 15248 | 1442964_at   | Region | AU020772      | 277939 | 7    | 94478918  | 94576823  | +    |
| 15249 | 1431098_at   | Region | Rsn           | 56430  | 5    | 122749321 | 122826732 | -    |
| 15250 | 1419867_a_at | Region | Ankhd1        | 108857 | 18   | 36862126  | 36866764  | +    |
| 15251 | 1432843_at   | Region | 5730405O12Rik | 70488  | NONE | NONE      | NONE      | NONE |
| 15252 | 1421019_at   | Region | 1700021F05Rik | 67851  | 10   | 43631481  | 43647355  | -    |
| 15253 | 1440353_at   | Region | Ntf5          | 78405  | 7    | 39490789  | 39494273  | +    |
| 15254 | 1451095_at   | Region | Asns          | 27053  | 6    | 7647928   | 7665939   | -    |
| 15255 | 1451780_at   | Region | Blnk          | 17060  | 19   | 40473299  | 40538907  | -    |
| 15256 | 1418370_at   | Region | Tnnc1         | 21924  | 14   | 29340150  | 29343549  | +    |
| 15257 | 1437439_at   | Region | 2410089E03Rik | 73692  | 15   | 7956639   | 8058734   | +    |
| 15258 | 1438971_x_at | Region | Ube2h         | 22214  | 6    | 30260446  | 30352143  | -    |
| 15259 | 1421897_at   | Region | Elk1          | 13712  | X    | 19173867  | 19189533  | -    |
| 15260 | 1427269_at   | Region | Sfrs11        | 69207  | 3    | 157020040 | 157032607 | -    |
| 15261 | 1438365_x_at | Region | Laptm4b       | 114128 | 15   | 34237699  | 34283968  | +    |
| 15262 | 1420882_a_at | Region | Acd           | 497652 | 13   | 53854390  | 53923720  | +    |
| 15263 | 1433388_at   | Region | 2900022M07Rik | 72951  | NONE | NONE      | NONE      | NONE |
| 15264 | 1445952_at   | Region | Baiap1        | 14924  | 6    | 94131999  | 94737301  | -    |
| 15265 | 1460684_at   | Region | Tm7sf2        | 73166  | 19   | 5851612   | 5856632   | -    |
| 15266 | 1448505_at   | Region | MGI:1927354   | 57316  | 11   | 17152411  | 17163969  | +    |
| 15267 | 1439464_s_at | Region | Tex10         | 269536 | 4    | 48348434  | 48389381  | -    |
| 15268 | 1436355_at   | Region | None          | None   | NONE | NONE      | NONE      | NONE |
| 15269 | 1437604_x_at | Region | Apcdd1        | 494504 | 18   | 63040206  | 63182348  | +    |
| 15270 | 1434076_at   | Region | Wdr37         | 207615 | 13   | 8762169   | 8828183   | -    |
| 15271 | 1437179_at   | Region | Rif1          | 51869  | 2    | 52004994  | 52054222  | +    |
| 15272 | 1418524_at   | Region | Pcm1          | 18536  | 8    | 40177407  | 40269978  | +    |
| 15273 | 1418457_at   | Region | Cxcl14        | 57266  | 13   | 54906542  | 54914449  | -    |
| 15274 | 1417719_at   | Region | Sap30         | 60406  | 8    | 56521958  | 56527090  | -    |
| 15275 | 1427087_at   | Region | Luc7l2        | 192196 | 6    | 38687728  | 38745622  | +    |
| 15276 | 1418776_at   | Region | 5830443L24Rik | 76074  | 5    | 103928079 | 104182535 | -    |
| 15277 | 1418174_at   | Region | Dbp           | 13170  | 7    | 39788555  | 39793474  | +    |
| 15278 | 1437570_at   | Region | Al503301      | 103762 | 11   | 94109008  | 94110891  | -    |
| 15279 | 1433576_at   | Region | Mat2a         | 232087 | 6    | 72764773  | 72771532  | -    |
| 15280 | 1438079_at   | Region | BC050078      | 237775 | 11   | 59187430  | 59198103  | -    |
| 15281 | 1418020_s_at | Region | Cpd           | 12874  | 11   | 76507648  | 76572655  | -    |
| 15282 | 1426890_a_at | Region | Rpap1         | 68925  | 2    | 119277813 | 119301347 | -    |
| 15283 | 1454989_at   | Region | BC055915      | 211660 | 1    | 10178667  | 10241764  | +    |
| 15284 | 1451133_s_at | Region | 8430437G11Rik | 101118 | 6    | 13567638  | 13595014  | -    |
| 15285 | 1423833_a_at | Region | Brp44         | 70456  | 1    | 165383120 | 165403135 | +    |
| 15286 | 1417214_at   | Region | Rab27b        | 80718  | 18   | 70213787  | 70288489  | -    |
| 15287 | 1419589_at   | Region | C1qr1         | 17064  | 2    | 147893588 | 147900480 | -    |
| 15288 | 1451845_a_at | Region | A230072l16Rik | 217057 | 11   | 86411975  | 86420315  | +    |
| 15289 | 1434580_at   | Region | Enpp4         | 224794 | 17   | 41602556  | 41609249  | -    |
| 15290 | 1420374_at   | Region | Foxj2         | 60611  | 6    | 123487129 | 123512478 | +    |
| 15291 | 1452176_at   | Region | Nup153        | 218210 | 13   | 46278420  | 46325906  | -    |
| 15292 | 1459729_at   | Region | Slc13a5       | 237831 | 11   | 71969163  | 71992223  | -    |
| 15293 | 1438458_a_at | Region | Sfpq          | 71514  | 4    | 126048448 | 126057909 | +    |
| 15294 | 1449741_at   | Region | Dsg2          | 13511  | 18   | 20773051  | 20817758  | +    |
| 15295 | 1422300_at   | Region | Nog           | 18121  | 11   | 89122409  | 89123107  | -    |
| 15296 | 1426999_at   | Region | 2700069A02Rik | 75553  | 12   | 94185830  | 94214695  | +    |
| 15297 | 1452970_at   | Region | Zfp198        | 76007  | 14   | 51415856  | 51488606  | +    |
| 15298 | 1451185_at   | Region | Sf3b5         | 66125  | 10   | 12890149  | 12890854  | +    |
| 15299 | 1434806_at   | Region | Mtx3          | 382793 | 13   | 89041743  | 89043160  | +    |
| 15300 | 1429083_at   | Region | Agl           | 77559  | 3    | 115512007 | 115576987 | -    |
| 15301 | 1455872_at   | Region | A030013D21    | 219148 | 14   | 57967046  | 57996089  | +    |

|       |              |        |               |        |    |           |           |   |
|-------|--------------|--------|---------------|--------|----|-----------|-----------|---|
| 15302 | 1450251_a_at | Region | Lnx1          | 16924  | 5  | 73427153  | 73512831  | - |
| 15303 | 1448314_at   | Region | Cdc2a         | 12534  | 10 | 69391976  | 69408253  | - |
| 15304 | 1433582_at   | Region | 1190002N15Rik | 68861  | 9  | 94379663  | 94444801  | - |
| 15305 | 1434705_at   | Region | Ctbp2         | 13017  | 7  | 127353901 | 127489679 | - |
| 15306 | 1429883_at   | Region | Actl6a        | 56456  | 3  | 32116905  | 32135138  | + |
| 15307 | 1420837_at   | Region | Ntrk2         | 18212  | 13 | 57448390  | 57572946  | + |
| 15308 | 1427089_at   | Region | Ccnt2         | 72949  | 1  | 127616552 | 127647225 | + |
| 15309 | 1418396_at   | Region | Gpsm3         | 106512 | 17 | 32288936  | 32290990  | + |
| 15310 | 1440630_at   | Region | None          | None   | 3  | 24845240  | 24845907  | - |
| 15311 | 1447803_x_at | Region | Capg          | 12332  | 6  | 72878054  | 72896490  | + |
| 15312 | 1446567_at   | Region | None          | None   | 17 | 45068354  | 45069002  | + |
| 15313 | 1449078_at   | Region | St3gal6       | 54613  | 16 | 57459955  | 57512884  | - |
| 15314 | 1439270_x_at | Region | Ran           | 19384  | 5  | 128195181 | 128199286 | + |
| 15315 | 1448192_s_at | Region | Prps1         | 19139  | X  | 134001552 | 134021078 | + |
| 15316 | 1446158_at   | Region | Sec15l2       | 75914  | 6  | 84969806  | 85419115  | - |
| 15317 | 1438629_x_at | Region | Grn           | 14824  | 11 | 102251594 | 102257892 | + |
| 15318 | 1427535_s_at | Region | AW822216      | 98733  | 1  | 75781262  | 75796364  | - |
| 15319 | 1428822_a_at | Region | Snx24         | 69226  | 18 | 53463791  | 53608966  | + |
| 15320 | 1424809_at   | Region | Crb3          | 224912 | 17 | 54752222  | 54755863  | + |
| 15321 | 1446167_at   | Region | Hipk2         | 15258  | 6  | 38834084  | 39012133  | - |
| 15322 | 1435010_at   | Region | Asb7          | 117589 | 7  | 60532010  | 60573698  | - |
| 15323 | 1428723_at   | Region | 2310047M10Rik | 71923  | 11 | 68785392  | 68787234  | + |
| 15324 | 1459548_at   | Region | Spire1        | 68166  | 18 | 67718995  | 67783507  | - |
| 15325 | 1418293_at   | Region | lfit2         | 15958  | 19 | 33882125  | 33907702  | + |
| 15326 | 1435550_at   | Region | C430014K11Rik | 320003 | 15 | 98888709  | 98889520  | - |
| 15327 | 1428695_at   | Region | 9130227C08Rik | 219094 | 14 | 50402985  | 50414797  | + |
| 15328 | 1419681_a_at | Region | Prok2         | 50501  | 6  | 100179494 | 100194587 | - |
| 15329 | 1420903_at   | Region | St6galnac3    | 20447  | 3  | 152205547 | 152511989 | - |
| 15330 | 1435688_at   | Region | None          | None   | 8  | 90102632  | 90103531  | - |
| 15331 | 1424370_s_at | Region | Psmf1         | 228769 | 2  | 151172998 | 151198229 | - |
| 15332 | 1451589_at   | Region | Gats          | 80909  | 5  | 133391036 | 133432162 | + |
| 15333 | 1422286_a_at | Region | Tgif          | 21815  | 17 | 68616183  | 68623166  | - |
| 15334 | 1435988_x_at | Region | Ik            | 24010  | 18 | 36968481  | 36981400  | + |
| 15335 | 1437872_at   | Region | AB112350      | 242864 | 5  | 20115267  | 20153709  | - |
| 15336 | 1421820_a_at | Region | Nf2           | 18016  | 11 | 4662781   | 4744337   | - |
| 15337 | 1426734_at   | Region | BC022623      | 224093 | 16 | 29408747  | 29411779  | + |
| 15338 | 1418345_at   | Region | Tnfsf13       | 69583  | 11 | 69408706  | 69411183  | - |
| 15339 | 1438708_x_at | Region | Ywhab         | 54401  | 2  | 163452166 | 163475556 | + |
| 15340 | 1438309_at   | Region | None          | None   | 2  | 58192993  | 58193576  | - |
| 15341 | 1448172_at   | Region | Mdh1          | 17449  | 11 | 21451580  | 21466622  | - |
| 15342 | 1449643_s_at | Region | Btf3          | 218490 | 13 | 94498396  | 94505466  | - |
| 15343 | 1418071_s_at | Region | Cdyl          | 12593  | 13 | 35194740  | 35408765  | + |
| 15344 | 1426874_at   | Region | BC022641      | 234699 | 8  | 105176798 | 105189055 | + |
| 15345 | 1420899_at   | Region | Rab18         | 19330  | 18 | 60692     | 85718     | - |
| 15346 | 1429129_at   | Region | 1200008A14Rik | 71710  | 3  | 14530640  | 14569495  | + |
| 15347 | 1460294_at   | Region | Atp8a2        | 50769  | 14 | 54182804  | 54623125  | - |
| 15348 | 1437524_x_at | Region | Coro7         | 78885  | 16 | 4297661   | 4351229   | - |
| 15349 | 1423122_at   | Region | Avpi1         | 69534  | 19 | 41667647  | 41673365  | - |
| 15350 | 1456419_at   | Region | 5730455P16Rik | 70591  | 11 | 80087114  | 80108980  | - |
| 15351 | 1429106_at   | Region | 4921509J17Rik | 70857  | 3  | 40214140  | 40215805  | + |
| 15352 | 1422151_at   | Region | Gats          | 80909  | 5  | 133391036 | 133432162 | + |
| 15353 | 1441300_at   | Region | Kcnf1         | 382571 | 12 | 16538786  | 16543211  | - |
| 15354 | 1454731_at   | Region | Myo10         | 17909  | 15 | 25611655  | 25800954  | + |
| 15355 | 1417070_at   | Region | Cyp4v3        | 102294 | 8  | 44254051  | 44281445  | - |
| 15356 | 1428554_a_at | Region | 1810035L17Rik | 380773 | 12 | 84547466  | 84553473  | - |
| 15357 | 1435563_at   | Region | Mrps5         | 77721  | 2  | 127101279 | 127117839 | + |
| 15358 | 1436277_at   | Region | None          | None   | 4  | 150799381 | 150801271 | - |
| 15359 | 1429190_at   | Region | 1110007C02Rik | 71784  | 13 | 90125585  | 90127079  | + |
| 15360 | 1418676_at   | Region | Isl2          | 104360 | 9  | 55654173  | 55659145  | + |
| 15361 | 1456379_x_at | Region | Dner          | 227325 | 1  | 84703796  | 85030178  | - |
| 15362 | 1454835_at   | Region | Epm2aip1      | 77781  | 9  | 111313226 | 111320386 | + |
| 15363 | 1437704_at   | Region | 2900024O10Rik | 72852  | 13 | 77830145  | 77830658  | + |
| 15364 | 1416083_at   | Region | Za20d2        | 22682  | 19 | 20510205  | 20520216  | + |

Rpl11 ///  
 LOC235424 ///

|       |              |        |               |        |      |           |           |      |
|-------|--------------|--------|---------------|--------|------|-----------|-----------|------|
| 15365 | 1448773_at   | Region | LOC328825     | 235424 | 9    | 59260606  | 59267974  | -    |
| 15366 | 1446868_at   | Region | None          | None   | 6    | 129133782 | 129134297 | +    |
| 15367 | 1452652_at   | Region | 2310037P21Rik | 72309  | 9    | 123277458 | 123278318 | -    |
| 15368 | 1435268_at   | Region | None          | None   | 10   | 75117622  | 75118105  | +    |
| 15369 | 1428648_at   | Region | Cand1         | 71902  | 10   | 118778384 | 118938138 | -    |
| 15370 | 1421973_at   | Region | Gfra1         | 14585  | 19   | 57822423  | 58054639  | -    |
| 15371 | 1430519_a_at | Region | Cnot7         | 18983  | 8    | 39436679  | 39454947  | -    |
| 15372 | 1416199_at   | Region | Kifc3         | 16582  | 8    | 94384005  | 94394596  | -    |
| 15373 | 1434386_at   | Region | Atp2c1        | 235574 | 9    | 105393471 | 105477208 | -    |
| 15374 | 1435797_at   | Region | None          | None   | 5    | 28729806  | 28730574  | +    |
| 15375 | 1430437_a_at | Region | 1300018I17Rik | 72325  | 8    | 122617239 | 122629245 | -    |
| 15376 | 1430055_at   | Region | 1700080G18Rik | 73533  | 6    | 30094506  | 30095087  | -    |
| 15377 | 1451645_at   | Region | Fbs1          | 14123  | 7    | 121534337 | 121540615 | +    |
| 15378 | 1453485_s_at | Region | 1110005A03Rik | 74319  | 11   | 116664693 | 116670827 | +    |
| 15379 | 1456161_at   | Region | 0610040B10Rik | 67672  | 5    | 142387810 | 142391583 | +    |
| 15380 | 1449888_at   | Region | Epas1         | 13819  | 17   | 84588025  | 84665705  | +    |
| 15381 | 1458302_at   | Region | None          | None   | NONE | NONE      | NONE      | NONE |
| 15382 | 1434381_at   | Region | BC060631      | 234776 | 8    | 116271705 | 116288863 | +    |
| 15383 | 1445741_at   | Region | Ppm1e         | 320472 | 11   | 86954898  | 87086986  | -    |
| 15384 | 1456617_a_at | Region | Eif2s2        | 67204  | 2    | 154328353 | 154349719 | -    |
| 15385 | 1418003_at   | Region | 1190002H23Rik | 66214  | 14   | 73642798  | 73655682  | -    |
| 15386 | 1432177_a_at | Region | Mnat1         | 17420  | 12   | 69969909  | 70119026  | +    |
| 15387 | 1430153_at   | Region | Tmod2         | 50876  | 9    | 75710299  | 75748747  | -    |
| 15388 | 1456530_x_at | Region | Elovl1        | 54325  | 4    | 117387050 | 117391522 | +    |
| 15389 | 1452871_at   | Region | Neil1         | 72774  | 9    | 57256745  | 57260523  | -    |
| 15390 | 1435732_x_at | Region | Atp6v0c       | 11984  | 17   | 21967459  | 21973000  | -    |
| 15391 | 1415826_at   | Region | Atp6v1h       | 108664 | 1    | 5048448   | 5126164   | +    |
| 15392 | 1429809_at   | Region | 8430438D04Rik | 278279 | 10   | 105080153 | 105466941 | -    |
| 15393 | 1447757_x_at | Region | Inpp5f        | 101490 | 7    | 122660050 | 122745896 | +    |
| 15394 | 1435153_at   | Region | Btbd6         | 399566 | 12   | 108452744 | 108455121 | +    |
| 15395 | 1415946_at   | Region | Pigq          | 14755  | 17   | 3046      | 4385      | -    |
| 15396 | 1424281_at   | Region | Ubap2         | 68926  | 4    | 41333166  | 41413986  | -    |
| 15397 | 1438677_at   | Region | Pkp4          | 227937 | 2    | 59016420  | 59210603  | +    |
| 15398 | 1422844_a_at | Region | Wdr77         | 70465  | 3    | 105755327 | 105765589 | +    |
| 15399 | 1447950_at   | Region | A730011C13Rik | 319916 | 3    | 94482696  | 94483792  | -    |
| 15400 | 1433569_x_at | Region | Ran           | 19384  | 5    | 128195181 | 128199286 | +    |
| 15401 | 1455339_at   | Region | C430014M02Rik | 338355 | 4    | 61391533  | 61451725  | -    |
| 15402 | 1416855_at   | Region | Gas1          | 14451  | 13   | 58831933  | 58834893  | -    |
| 15403 | 1419914_s_at | Region | D10Ert438e    | 52014  | 10   | 52670740  | 52691207  | +    |
| 15404 | 1439168_at   | Region | Camk2d        | 108058 | 3    | 125480582 | 125726370 | +    |
| 15405 | 1430033_at   | Region | 5330431K02Rik | 68189  | 13   | 95691241  | 95693153  | -    |
| 15406 | 1430983_at   | Region | Pdia6         | 71853  | 12   | 16627969  | 16646144  | +    |
| 15407 | 1428919_at   | Region | Fgfr1op       | 75296  | 17   | 778       | 15020     | +    |
| 15408 | 1436788_at   | Region | None          | None   | 2    | 90917134  | 90917822  | +    |
| 15409 | 1426755_at   | Region | Ckap4         | 216197 | 10   | 84420966  | 84428436  | -    |
| 15410 | 1452154_at   | Region | Iars          | 105148 | 13   | 49279007  | 49331120  | +    |
| 15411 | 1424062_at   | Region | Ube2d1        | 216080 | 10   | 71308947  | 71339200  | -    |
| 15412 | 1428237_at   | Region | 2700059D21Rik | 433693 | 4    | 34689700  | 34705975  | +    |
| 15413 | 1435375_at   | Region | BC052328      | 223433 | 15   | 27644740  | 27670078  | -    |
| 15414 | 1456952_at   | Region | Arid1b        | 239985 | 17   | 4902975   | 5250462   | +    |
| 15415 | 1422262_a_at | Region | Lhx6          | 16874  | 2    | 36015701  | 36037433  | -    |
| 15416 | 1450130_at   | Region | Xpr1          | 19775  | 1    | 155171522 | 155308066 | -    |
| 15417 | 1431561_a_at | Region | Dhx34         | 71723  | 7    | 287       | 10829     | -    |
| 15418 | 1455191_x_at | Region | Pip5k1b       | 18720  | 3    | 94547426  | 94594689  | -    |
| 15419 | 1450739_at   | Region | Tbl1xr1       | 81004  | 3    | 21419728  | 21554694  | +    |
| 15420 | 1449154_at   | Region | Col11a1       | 12814  | 3    | 26642     | 73590     | -    |
| 15421 | 1448725_at   | Region | Parg          | 26430  | 14   | 30335360  | 30430279  | +    |
| 15422 | 1419458_at   | Region | Rgneh         | 110596 | 13   | 94087960  | 94394666  | -    |
| 15423 | 1430942_at   | Region | 8430437O03Rik | 71536  | 1    | 172113346 | 172114653 | +    |
| 15424 | 1419550_a_at | Region | Stk39         | 53416  | 2    | 68065847  | 68327381  | -    |
| 15425 | 1424000_a_at | Region | Rps11         | 27207  | 7    | 39198928  | 39200922  | -    |
| 15426 | 1423219_a_at | Region | Mrpl49        | 18120  | 19   | 5842420   | 5846541   | -    |
| 15427 | 1430355_a_at | Region | Steap3        | 68428  | 1    | 119985615 | 120002678 | -    |

|       |              |        |               |        |      |           |           |      |
|-------|--------------|--------|---------------|--------|------|-----------|-----------|------|
| 15428 | 1448381_at   | Region | Gfm1          | 28030  | 3    | 67102432  | 67147379  | +    |
| 15429 | 1425476_at   | Region | Col4a5        | 12830  | X    | 134915604 | 135128563 | +    |
| 15430 | 1419758_at   | Region | Abcb1a        | 18671  | 5    | 8666835   | 8755262   | +    |
| 15431 | 1418456_a_at | Region | Cxcl14        | 57266  | 13   | 54906542  | 54914449  | -    |
| 15432 | 1451538_at   | Region | Sox9          | 20682  | 11   | 112603317 | 112608842 | +    |
| 15433 | 1451419_at   | Region | MGI:2183445   | 211949 | 9    | 96842840  | 96917713  | -    |
| 15434 | 1460702_at   | Region | 1810015M01Rik | 69076  | 5    | 114451813 | 114454118 | +    |
| 15435 | 1435236_at   | Region | A630018P17Rik | 245695 | X    | 160099424 | 160109883 | -    |
| 15436 | 1442139_at   | Region | None          | None   | 9    | 4194044   | 4195311   | -    |
| 15437 | 1459630_at   | Region | None          | None   | 8    | 124551971 | 124552460 | +    |
| 15438 | 1457806_at   | Region | Dock1         | 330662 | 7    | 129038306 | 129541299 | +    |
| 15439 | 1431308_at   | Region | 5730557B15Rik | 67434  | 15   | 31296331  | 31368171  | -    |
| 15440 | 1437929_at   | Region | Dact2         | 240025 | 17   | 12245641  | 12254191  | -    |
| 15441 | 1418254_at   | Region | Apip          | 56369  | 2    | 102778429 | 102797375 | +    |
| 15442 | 1456524_at   | Region | Nrg1          | 211323 | 8    | 30634617  | 30806905  | -    |
| 15443 | 1433653_at   | Region | BC029169      | 208659 | 11   | 109494015 | 109543345 | -    |
| 15444 | 1423693_at   | Region | Ela1          | 109901 | 15   | 100731963 | 100745456 | -    |
| 15445 | 1427167_at   | Region | AI448196      | 102910 | X    | 128238260 | 128241693 | +    |
| 15446 | 1436234_at   | Region | 4732471D19Rik | 319719 | 13   | 53135721  | 53161052  | +    |
| 15447 | 1418521_a_at | Region | Mtx1          | 17827  | 3    | 88965562  | 88970378  | -    |
| 15448 | 1454722_at   | Region | Herc1         | 235439 | 9    | 66474369  | 66632783  | +    |
| 15449 | 1443728_at   | Region | None          | None   | NONE | NONE      | NONE      | NONE |
| 15450 | 1432080_s_at | Region | Myst1         | 67773  | 7    | 121962327 | 121975572 | +    |
| 15451 | 1435573_at   | Region | DXImx46e      | 54644  | X    | 6080771   | 6113800   | +    |
| 15452 | 1439497_at   | Region | None          | None   | 12   | 29985088  | 29986593  | +    |
| 15453 | 1451400_at   | Region | BC023488      | 237221 | X    | 159769900 | 159789915 | +    |
| 15454 | 1436422_at   | Region | BC026590      | 230234 | 4    | 56745799  | 56753050  | +    |
| 15455 | 1437547_s_at | Region | Dnajc14       | 74330  | 10   | 128542766 | 128556536 | +    |
| 15456 | 1428531_at   | Region | 5930412E23Rik | 77065  | 1    | 191312045 | 191358940 | +    |
| 15457 | 1418017_at   | Region | Pum2          | 80913  | 12   | 7990991   | 8066649   | +    |
| 15458 | 1416146_at   | Region | Hspa4         | 15525  | 11   | 53014415  | 53053230  | -    |
| 15459 | 1450783_at   | Region | Ifit1         | 15957  | 19   | 33983921  | 33992786  | +    |
| 15460 | 1448434_at   | Region | Rnf103        | 22644  | 6    | 71825871  | 71842858  | +    |
| 15461 | 1419663_at   | Region | Ogn           | 18295  | 13   | 49204931  | 49221360  | +    |
| 15462 | 1446603_at   | Region | None          | None   | NONE | NONE      | NONE      | NONE |
| 15463 | 1434888_a_at | Region | Matr3         | 17184  | 18   | 35795510  | 35815074  | +    |
| 15464 | 1451249_at   | Region | D8Ert812e     | 212528 | 8    | 83954671  | 83965285  | +    |
| 15465 | 1438452_at   | Region | Nebl          | 74103  | 2    | 17385579  | 17386998  | -    |
| 15466 | 1448696_at   | Region | Heph          | 15203  | X    | 91056822  | 91175846  | +    |
| 15467 | 1441789_at   | Region | Phtf1         | 18685  | 3    | 103395581 | 103434755 | +    |
| 15468 | 1438317_a_at | Region | Endog         | 13804  | 2    | 30103686  | 30106231  | +    |
| 15469 | 1421916_at   | Region | Pdgfra        | 18595  | 5    | 73986573  | 74032425  | +    |
| 15470 | 1440660_at   | Region | Nfia          | 18027  | 4    | 96752972  | 97087465  | +    |
| 15471 | 1433562_s_at | Region | Atp5f1        | 11950  | 3    | 105738523 | 105755085 | -    |
| 15472 | 1441315_s_at | Region | Slc19a2       | 116914 | 1    | 164168307 | 164184621 | +    |
| 15473 | 1421351_at   | Region | Gria4         | 14802  | 9    | 4328268   | 4706535   | -    |
| 15474 | 1429884_at   | Region | Srgap2        | 14270  | 1    | 131135970 | 131377678 | -    |
| 15475 | 1416938_at   | Region | Chchd1        | 66121  | 14   | 19064381  | 19065729  | +    |
| 15476 | 1452228_at   | Region | 4930451A13Rik | 67581  | 16   | 56073492  | 56138746  | -    |
| 15477 | 1426911_at   | Region | Dsc2          | 13506  | 18   | 20248374  | 20277081  | -    |
| 15478 | 1453343_s_at | Region | Vrk2          | 69922  | 11   | 26366194  | 26488401  | -    |
| 15479 | 1459205_at   | Region | Cpeb1         | 12877  | 7    | 75155001  | 75262817  | -    |
| 15480 | 1436212_at   | Region | AI661017      | 213068 | 15   | 66550198  | 66585032  | -    |
| 15481 | 1419160_at   | Region | Golga3        | 269682 | 5    | 109227485 | 109273939 | +    |
| 15482 | 1460364_at   | Region | Gtf2ird1      | 57080  | 5    | 87703     | 186724    | -    |
| 15483 | 1444378_at   | Region | Csnk1d        | 104318 | 11   | 120784515 | 120812412 | -    |
| 15484 | 1426419_at   | Region | 1700009P03Rik | 74213  | 14   | 99658921  | 99720050  | -    |
| 15485 | 1421660_at   | Region | Scn9a         | 20274  | 2    | 66338406  | 66490352  | -    |
| 15486 | 1435186_s_at | Region | 1200008A14Rik | 71710  | 3    | 14530640  | 14569495  | +    |
| 15487 | 1455287_at   | Region | Cdk6          | 12571  | 5    | 3350317   | 3528230   | +    |
|       |              |        | Mcm7 ///      |        |      |           |           |      |
|       |              |        | LOC433027 /// |        |      |           |           |      |
| 15488 | 1439269_x_at | Region | LOC436369     | 17220  | 5    | 137137397 | 137144671 | -    |
| 15489 | 1425930_a_at | Region | Tcf14         | 21428  | 11   | 100908397 | 100913294 | +    |
| 15490 | 1439397_at   | Region | BB164513      | 99456  | 2    | 113339682 | 113340006 | +    |

|       |              |        |               |        |    |           |           |   |
|-------|--------------|--------|---------------|--------|----|-----------|-----------|---|
| 15491 | 1455885_at   | Region | 6530401C20Rik | 231842 | 5  | 139722959 | 139752142 | + |
| 15492 | 1426051_a_at | Region | Cenpb         | 12616  | 2  | 130691142 | 130693865 | - |
| 15493 | 1423088_at   | Region | Tmod3         | 50875  | 9  | 75635361  | 75697149  | - |
| 15494 | 1439851_at   | Region | Rabl5         | 67286  | 5  | 135921272 | 135926366 | + |
| 15495 | 1459304_at   | Region | A730054J21Rik | 320862 | 1  | 178891343 | 178892013 | + |
| 15496 | 1430021_a_at | Region | Uble1a        | 56459  | 7  | 13308414  | 13337163  | - |
| 15497 | 1429291_at   | Region | Psmd1         | 70247  | 1  | 85870986  | 85945610  | + |
| 15498 | 1419213_at   | Region | Nat6          | 56441  | 9  | 107645950 | 107649829 | + |
| 15499 | 1448268_at   | Region | Tmed9         | 67511  | 13 | 54209701  | 54214246  | + |
| 15500 | 1423814_at   | Region | Ddx41         | 72935  | 13 | 54146976  | 54153070  | - |
| 15501 | 1437171_x_at | Region | Gsn           | 227753 | 2  | 35214602  | 35240054  | + |
| 15502 | 1449079_s_at | Region | St3gal6       | 54613  | 16 | 57459955  | 57512884  | - |
| 15503 | 1426400_a_at | Region | Capns1        | 12336  | 7  | 25600378  | 25608047  | - |
| 15504 | 1419988_at   | Region | Map3k7        | 26409  | 4  | 32242911  | 32299581  | + |
| 15505 | 1455175_at   | Region | Phf13         | 230936 | 4  | 150481995 | 150484924 | - |
| 15506 | 1418274_at   | Region | Nutf2         | 68051  | 8  | 105156479 | 105176249 | + |
| 15507 | 1456117_at   | Region | 2600005C20Rik | 72462  | 17 | 29844491  | 29868935  | + |
| 15508 | 1451747_a_at | Region | Atg12l        | 67526  | 18 | 46954183  | 46963313  | - |
| 15509 | 1438865_at   | Region | H13           | 14950  | 2  | 152126435 | 152163760 | + |
| 15510 | 1442056_at   | Region | None          | None   | 18 | 55197430  | 55197921  | - |
| 15511 | 1448814_at   | Region | Gab1          | 14388  | 8  | 79976442  | 80092487  | - |
| 15512 | 1416132_at   | Region | C920006C10Rik | 76740  | 15 | 65810937  | 65897708  | + |
| 15513 | 1423786_at   | Region | 8430410A17Rik | 232210 | 6  | 88350638  | 88373276  | + |
| 15514 | 1426601_at   | Region | Slc37a1       | 224674 | 17 | 29103349  | 29158548  | + |
| 15515 | 1426612_at   | Region | MGI:1921571   | 66131  | 9  | 64403798  | 64426983  | + |
| 15516 | 1439174_at   | Region | 9430047L24Rik | 320850 | 3  | 140498710 | 140499375 | + |
| 15517 | 1455293_at   | Region | Gm185         | 235497 | 9  | 75579103  | 75604011  | + |
| 15518 | 1416710_at   | Region | Tmem35        | 67564  | X  | 127840164 | 127850908 | + |
| 15519 | 1423578_at   | Region | Col11a2       | 12815  | 17 | 31743993  | 31771080  | + |
| 15520 | 1433500_at   | Region | B930096L08Rik | 209773 | 6  | 39597808  | 39693264  | - |
| 15521 | 1419817_s_at | Region | D1ErtD161e    | 52231  | 1  | 75480104  | 75487168  | + |
| 15522 | 1457055_at   | Region | Nubp1         | 26425  | 16 | 10086475  | 10098031  | + |
| 15523 | 1440456_at   | Region | LOC381255     | 381255 | 1  | 53842507  | 54014298  | - |
| 15524 | 1425162_at   | Region | Rorb          | 225998 | 19 | 18184597  | 18248073  | - |
| 15525 | 1432436_a_at | Region | Ak3           | 56248  | 19 | 28273429  | 28300499  | - |
| 15526 | 1452596_at   | Region | Polr2k        | 17749  | 15 | 36175320  | 36178275  | + |
| 15527 | 1436599_at   | Region | AW493225      | 101862 | 7  | 117531763 | 117532746 | - |
| 15528 | 1431420_s_at | Region | 2610524G07Rik | 66494  | 13 | 53930924  | 53934141  | + |
| 15529 | 1443271_at   | Region | AW121567      | 270028 | 8  | 8571891   | 9138527   | - |
| 15530 | 1460725_at   | Region | Xpa           | 22590  | 4  | 46091161  | 46112233  | - |
| 15531 | 1418607_at   | Region | Zfp99         | 67235  | 5  | 144191673 | 144240274 | - |
| 15532 | 1434144_s_at | Region | 2410187C16Rik | 76773  | 15 | 58150452  | 58167670  | + |
| 15533 | 1453371_at   | Region | 4930535B03Rik | 75137  | 3  | 95249480  | 95306695  | - |
| 15534 | 1427031_s_at | Region | D16ErtD480e   | 212514 | 16 | 43230787  | 43271716  | + |
| 15535 | 1433898_at   | Region | Slc25a30      | 67554  | 14 | 70104494  | 70129532  | - |
| 15536 | 1420975_at   | Region | Baz1b         | 22385  | 5  | 134200851 | 134258059 | + |
| 15537 | 1444163_at   | Region | Nek5          | 330721 | 8  | 20825787  | 20877224  | - |
| 15538 | 1446614_at   | Region | Dgkz          | 104418 | 2  | 91637575  | 91668348  | - |
| 15539 | 1451587_a_at | Region | Tiprl         | 226591 | 1  | 165134760 | 165159417 | - |
| 15540 | 1451493_at   | Region | Ndfip1        | 65113  | 18 | 38640514  | 38688909  | + |
| 15541 | 1424406_at   | Region | Bcl2l13       | 94044  | 6  | 121268204 | 121320977 | + |
| 15542 | 1460338_a_at | Region | Crif3         | 54394  | 11 | 79772158  | 79806616  | - |
| 15543 | 1452646_at   | Region | Trp53inp2     | 68728  | 2  | 154838793 | 154846784 | + |
| 15544 | 1455508_at   | Region | A530082C11Rik | 320541 | 4  | 154093778 | 154115702 | + |
| 15545 | 1444232_at   | Region | Prkg1         | 19091  | 19 | 29820457  | 30038883  | - |
| 15546 | 1421030_at   | Region | Zfp64         | 22722  | 2  | 168434104 | 168463992 | - |
| 15547 | 1419072_at   | Region | Gstm7         | 68312  | 3  | 107722076 | 107727569 | - |
| 15548 | 1437830_x_at | Region | Zbed3         | 72114  | 13 | 91509451  | 91522055  | + |
| 15549 | 1456081_a_at | Region | Aacs          | 78894  | 5  | 124642786 | 124684316 | + |
| 15550 | 1451393_at   | Region | Pex26         | 74043  | 6  | 146495249 | 146507767 | - |
| 15551 | 1445260_at   | Region | Tes3          | 114893 | 3  | 35346474  | 35374678  | - |
| 15552 | 1423271_at   | Region | Gjb2          | 14619  | 14 | 51629902  | 51635949  | - |
| 15553 | 1436650_at   | Region | Filip1        | 70598  | 9  | 80020763  | 80183546  | - |
| 15554 | 1425070_at   | Region | Ntrk3         | 18213  | 7  | 71981888  | 72367304  | - |
| 15555 | 1437577_at   | Region | Usp34         | 17847  | 11 | 23201764  | 23383978  | + |

|       |              |        |               |        |      |           |           |      |
|-------|--------------|--------|---------------|--------|------|-----------|-----------|------|
| 15556 | 1437944_at   | Region | Shc2          | 216148 | 10   | 79740620  | 79759030  | -    |
| 15557 | 1446360_at   | Region | Rora          | 19883  | 9    | 69474948  | 69510983  | +    |
| 15558 | 1451491_at   | Region | 4930556P03Rik | 75284  | 15   | 99527766  | 99532411  | -    |
| 15559 | 1435259_s_at | Region | D2ErtD217e    | 51875  | 2    | 25552229  | 25554164  | -    |
| 15560 | 1417201_at   | Region | Nt5c2         | 76952  | 19   | 46438257  | 46513006  | -    |
| 15561 | 1434269_at   | Region | AA536717      | 105428 | 14   | 18739182  | 18744804  | +    |
| 15562 | 1440338_at   | Region | None          | None   | NONE | NONE      | NONE      | NONE |
| 15563 | 1423452_at   | Region | Stk17b        | 98267  | 1    | 54063026  | 54092666  | -    |
| 15564 | 1426902_at   | Region | Coq6          | 217707 | 12   | 81230394  | 81242137  | +    |
| 15565 | 1442163_at   | Region | Hace1         | 209462 | 10   | 45739404  | 45873759  | +    |
| 15566 | 1437816_at   | Region | None          | None   | 2    | 105379944 | 105380641 | -    |
| 15567 | 1418714_at   | Region | Dusp8         | 18218  | 7    | 136494291 | 136503065 | -    |
| 15568 | 1438118_x_at | Region | Vim           | 22352  | 2    | 13489961  | 13498816  | +    |
| 15569 | 1451630_at   | Region | Ttl           | 69737  | 2    | 128579837 | 128607602 | +    |
| 15570 | 1455510_at   | Region | Spop          | 20747  | 11   | 95235201  | 95314100  | +    |
| 15571 | 1428646_at   | Region | 2310056B04Rik | 70402  | 1    | 168088096 | 168092493 | -    |
| 15572 | 1422442_at   | Region | Smu1          | 74255  | 4    | 40875969  | 40896722  | -    |
| 15573 | 1432360_a_at | Region | 4930403J22Rik | 70551  | 14   | 117484003 | 117547608 | -    |
| 15574 | 1459245_s_at | Region | Grid2         | 14804  | 6    | 64146694  | 64904112  | +    |
| 15575 | 1456786_at   | Region | Ldb2          | 16826  | 5    | 43229785  | 43558377  | -    |
| 15576 | 1435247_at   | Region | Ube1dc1       | 66663  | 9    | 104024992 | 104040598 | -    |
| 15577 | 1435193_at   | Region | A230050P20Rik | 319278 | 9    | 20745994  | 20751594  | +    |
| 15578 | 1434669_at   | Region | Ralgs1        | 241308 | 2    | 33069135  | 33303640  | -    |
| 15579 | 1458997_at   | Region | A230106M20Rik | 210094 | 7    | 37547672  | 37564754  | -    |
| 15580 | 1436755_at   | Region | Itih5         | 209378 | 2    | 10069730  | 10167804  | +    |
| 15581 | 1433088_at   | Region | 5330430C04Rik | 78274  | 18   | 25819803  | 25821121  | -    |
| 15582 | 1439660_at   | Region | Hivep3        | 16656  | 4    | 119003584 | 119157855 | +    |
| 15583 | 1434613_at   | Region | 1810013L24Rik | 69053  | 16   | 8502119   | 8528217   | +    |
| 15584 | 1443874_at   | Region | 2810002I04Rik | 72350  | 12   | 82156575  | 82167280  | +    |
| 15585 | 1442491_at   | Region | Dpp10         | 269109 | 1    | 123096743 | 123812573 | -    |
| 15586 | 1446516_at   | Region | Bcl7c         | 12055  | 7    | 121754709 | 121758497 | -    |
| 15587 | 1443147_at   | Region | None          | None   | 12   | 80924181  | 80924817  | +    |
| 15588 | 1429242_at   | Region | 1110054O05Rik | 66209  | 4    | 59713082  | 59727302  | -    |
| 15589 | 1435755_at   | Region | 1110001A16Rik | 68554  | 17   | 76738764  | 76742542  | +    |
| 15590 | 1435266_at   | Region | 9330112M16    | 329395 | 2    | 38998379  | 38999136  | -    |
| 15591 | 1423829_at   | Region | 0910001A06Rik | 223601 | 15   | 63945267  | 64076491  | -    |
| 15592 | 1416841_at   | Region | 1110059E24Rik | 66206  | 19   | 20835240  | 20890718  | -    |
| 15593 | 1456205_x_at | Region | Tbca          | 21371  | 13   | 90973009  | 91026965  | +    |
| 15594 | 1451387_s_at | Region | 0610039D01Rik | 67675  | 17   | 24733035  | 24734531  | -    |
| 15595 | 1444276_at   | Region | Ict1          | 68572  | 11   | 115224859 | 115232006 | +    |
| 15596 | 1438810_at   | Region | D10ErtD755e   | 52038  | 10   | 45582774  | 45583446  | -    |
| 15597 | 1457115_at   | Region | None          | None   | 8    | 83326787  | 83327440  | -    |
| 15598 | 1418561_at   | Region | Sf3b1         | 81898  | 1    | 55286605  | 55333156  | -    |
| 15599 | 1434060_at   | Region | Herc1         | 235439 | 9    | 66474369  | 66632783  | +    |
| 15600 | 1450228_a_at | Region | Pip5k1c       | 18717  | 10   | 81429153  | 81451529  | +    |
| 15601 | 1437175_at   | Region | Pdik1l        | 230809 | 4    | 133235901 | 133248731 | +    |
| 15602 | 1422471_at   | Region | Pex13         | 72129  | 11   | 23541269  | 23560725  | -    |
| 15603 | 1455323_at   | Region | MGI:1927369   | 57782  | 5    | 142231068 | 142239657 | -    |
| 15604 | 1452490_a_at | Region | Ap2a2         | 11772  | 7    | 135965073 | 136035847 | +    |
| 15605 | 1440029_at   | Region | St8sia3       | 20451  | 18   | 64496670  | 64507426  | +    |
| 15606 | 1431471_at   | Region | 4833428M15Rik | 77030  | 14   | 92558801  | 92560822  | -    |
| 15607 | 1431663_a_at | Region | Cntfr         | 12804  | 4    | 41796349  | 41835894  | -    |
| 15608 | 1457190_at   | Region | None          | None   | NONE | NONE      | NONE      | NONE |
| 15609 | 1418187_at   | Region | Ramp2         | 54409  | 11   | 101067518 | 101069332 | +    |
| 15610 | 1423641_s_at | Region | Cnot7         | 18983  | 8    | 39436679  | 39454947  | -    |
| 15611 | 1428256_at   | Region | 2310047H23Rik | 69672  | 13   | 54331208  | 54342785  | +    |
| 15612 | 1421697_at   | Region | Ush2a         | 22283  | 1    | 187770861 | 187963478 | +    |
| 15613 | 1423044_at   | Region | Prosc         | 114863 | 8    | 25775882  | 25789406  | +    |
| 15614 | 1418091_at   | Region | Tcfcp2l1      | 81879  | 1    | 118379384 | 118442320 | +    |
| 15615 | 1422565_s_at | Region | Nfic          | 18029  | 10   | 81536258  | 81554530  | -    |
| 15616 | 1416014_at   | Region | Abce1         | 24015  | 8    | 78898390  | 78925732  | -    |
| 15617 | 1440685_at   | Region | None          | None   | NONE | NONE      | NONE      | NONE |
| 15618 | 1429332_at   | Region | 4632427E13Rik | 68186  | 7    | 86778897  | 86781465  | -    |
| 15619 | 1457298_at   | Region | None          | None   | 13   | 17585800  | 17587390  | -    |
| 15620 | 1428107_at   | Region | Sh3bgrl       | 56726  | X    | 103696772 | 103763832 | +    |

|       |              |        |                   |        |      |           |           |      |
|-------|--------------|--------|-------------------|--------|------|-----------|-----------|------|
| 15621 | 1436013_at   | Region | C230098I05Rik     | 269994 | 7    | 119930434 | 120132142 | -    |
| 15622 | 1427160_at   | Region | 2500001H09Rik     | 74737  | 7    | 86684260  | 86709889  | -    |
| 15623 | 1438666_at   | Region | AI194318          | 241576 | 2    | 101654886 | 101891043 | -    |
| 15624 | 1415984_at   | Region | Acadm             | 11364  | 3    | 152924851 | 152946924 | -    |
| 15625 | 1423479_at   | Region | 1500002M01Rik     | 68979  | 11   | 106987749 | 107010349 | -    |
| 15626 | 1446835_at   | Region | None              | None   | 17   | 6016032   | 6016627   | +    |
| 15627 | 1438090_x_at | Region | C730048E16Rik     | 223690 | 15   | 79104380  | 79114145  | -    |
| 15628 | 1460035_at   | Region | Bcap37            | 12034  | 6    | 125367716 | 125372298 | +    |
| 15629 | 1444158_at   | Region | Jarid1c           | 20591  | X    | 145767667 | 145808191 | +    |
| 15630 | 1423534_at   | Region | Pdcd2             | 18567  | 17   | 13525230  | 13530933  | -    |
| 15631 | 1420088_at   | Region | None              | None   | 12   | 52209583  | 52210002  | -    |
| 15632 | 1416730_at   | Region | Rcl1              | 59028  | 19   | 28353974  | 28396442  | +    |
| 15633 | 1437573_at   | Region | 1110013G13Rik     | 74776  | 3    | 132200512 | 132268465 | +    |
| 15634 | 1442495_at   | Region | Birc6             | 12211  | 17   | 72336066  | 72510856  | +    |
| 15635 | 1424124_at   | Region | Mospd2            | 76763  | X    | 158535574 | 158579740 | -    |
| 15636 | 1437591_a_at | Region | Wdr1              | 22388  | 5    | 37274667  | 37309449  | -    |
| 15637 | 1460734_at   | Region | Col9a3            | 12841  | 2    | 180315202 | 180339143 | +    |
| 15638 | 1431744_a_at | Region | Smap1             | 98366  | 1    | 24090771  | 24166945  | -    |
| 15639 | 1438719_at   | Region | AI585793          | 106920 | 18   | 32471916  | 32473517  | +    |
| 15640 | 1451680_at   | Region | Srxn1             | 76650  | 2    | 151562666 | 151568289 | +    |
| 15641 | 1435908_at   | Region | Nrxn2             | 18190  | 19   | 6319521   | 6322577   | +    |
| 15642 | 1422630_at   | Region | Rad50             | 19360  | 11   | 53402411  | 53460138  | -    |
| 15643 | 1454773_at   | Region | None              | None   | 2    | 27692280  | 27695120  | +    |
| 15644 | 1424008_a_at | Region | Rbpms2            | 71973  | 9    | 65752847  | 65782783  | +    |
| 15645 | 1434895_s_at | Region | Ppp1r13b          | 21981  | 12   | 107308924 | 107388462 | -    |
| 15646 | 1417406_at   | Region | Sertad1           | 55942  | 7    | 22862956  | 22866317  | +    |
| 15647 | 1450701_a_at | Region | Gtf2h2            | 23894  | 13   | 96620603  | 96648043  | -    |
| 15648 | 1435637_at   | Region | D8Wsu49e          | 71927  | 8    | 84991315  | 85113385  | -    |
| 15649 | 1422178_a_at | Region | Rab17             | 19329  | 1    | 90777744  | 90789229  | -    |
| 15650 | 1420696_at   | Region | Sema3c            | 20348  | 5    | 15994279  | 16149731  | +    |
| 15651 | 1421673_s_at | Region | Stx1b2 /// Stx1b1 | 56216  | 7    | 121857026 | 121874109 | -    |
| 15652 | 1418932_at   | Region | Nfil3             | 18030  | 13   | 51530722  | 51544552  | -    |
| 15653 | 1435228_at   | Region | BC023829          | 236848 | X    | 65128250  | 65145669  | -    |
| 15654 | 1416065_a_at | Region | Ankrd10           | 102334 | 8    | 10984009  | 11008115  | -    |
| 15655 | 1455571_x_at | Region | Calm1             | 12313  | 12   | 95642228  | 95652493  | +    |
| 15656 | 1423983_at   | Region | Sez6l2            | 233878 | 7    | 121000294 | 121020334 | +    |
| 15657 | 1436431_at   | Region | 1700025G04Rik     | 69399  | 1    | 151777069 | 151974583 | -    |
| 15658 | 1435757_a_at | Region | Uqrc2             | 67003  | 7    | 114510774 | 114534837 | +    |
| 15659 | 1459557_at   | Region | Zbtb16            | 235320 | 9    | 48684510  | 48863820  | -    |
| 15660 | 1417886_at   | Region | 1810009A15Rik     | 66276  | 19   | 8085450   | 8087287   | +    |
| 15661 | 1452368_at   | Region | Bcr               | 110279 | 10   | 75162849  | 75286438  | +    |
| 15662 | 1441666_at   | Region | None              | None   | NONE | NONE      | NONE      | NONE |
| 15663 | 1426441_at   | Region | Slc11a2           | 18174  | 15   | 100445436 | 100469800 | -    |
| 15664 | 1421305_x_at | Region | Rabep1            | 54189  | 11   | 70570583  | 70666598  | +    |
| 15665 | 1425996_a_at | Region | Smarca3           | 20585  | 3    | 19399088  | 19457883  | +    |
| 15666 | 1436645_a_at | Region | Cnot4             | 53621  | 6    | 35139222  | 35227761  | -    |
| 15667 | 1429364_at   | Region | 4930579G24Rik     | 75939  | 3    | 79357237  | 79360959  | +    |
| 15668 | 1428170_at   | Region | Zfp180            | 210135 | 7    | 19255708  | 19281482  | +    |
| 15669 | 1450366_at   | Region | Bid3              | 12123  | 5    | 117298410 | 117313603 | +    |
| 15670 | 1422272_at   | Region | Phxr4             | 18689  | 9    | 13260619  | 13262009  | +    |
| 15671 | 1416066_at   | Region | Cd9               | 12527  | 6    | 126114754 | 126150059 | -    |
| 15672 | 1451221_at   | Region | BC018507          | 218333 | 13   | 66640392  | 66677128  | -    |
| 15673 | 1453034_at   | Region | Zfp251            | 71591  | 15   | 76903660  | 76922974  | -    |
| 15674 | 1455826_a_at | Region | Bace1             | 23821  | 9    | 45851835  | 45875693  | +    |
| 15675 | 1455108_at   | Region | Eif4e2            | 26987  | 1    | 87030076  | 87054566  | +    |
| 15676 | 1458202_at   | Region | 6330500D04Rik     | 193385 | 13   | 24152816  | 24157897  | +    |
| 15677 | 1430017_at   | Region | 1600016N20Rik     | 72000  | 7    | 135612060 | 135616438 | -    |
| 15678 | 1434530_at   | Region | Odz4              | 23966  | 7    | 90212889  | 90948341  | +    |
| 15679 | 1423823_at   | Region | 2610012O22Rik     | 69902  | 4    | 138228706 | 138233559 | -    |
| 15680 | 1427375_at   | Region | Rg9mtd2           | 108943 | 3    | 137032375 | 137047205 | +    |
| 15681 | 1441707_at   | Region | Psma3             | 19167  | 12   | 67809701  | 67829929  | +    |
| 15682 | 1417135_at   | Region | Srpk2             | 20817  | 5    | 21967253  | 22080468  | -    |
| 15683 | 1435960_at   | Region | LOC545923         | 545923 | 7    | 13898722  | 13905169  | +    |
| 15684 | 1431335_a_at | Region | Wfdc1             | 67866  | 8    | 119020384 | 119040470 | +    |
| 15685 | 1437034_x_at | Region | Marcks            | 17118  | 10   | 37207003  | 37211096  | -    |



|       |              |        |                   |        |      |           |           |      |
|-------|--------------|--------|-------------------|--------|------|-----------|-----------|------|
| 15686 | 1421472_at   | Region | 2900083I11Rik     | 58212  | 5    | 134820382 | 134855460 | +    |
| 15687 | 1416964_at   | Region | Eefsec            | 65967  | 6    | 88692712  | 88881898  | -    |
| 15688 | 1427310_at   | Region | Falz              | 207165 | 11   | 106856593 | 106978743 | -    |
| 15689 | 1446735_at   | Region | Sh3d1B            | 20403  | 12   | 3775688   | 3876446   | +    |
| 15690 | 1446088_at   | Region | 9430081I23Rik     | 320242 | 13   | 28249229  | 28249932  | -    |
| 15691 | 1435288_at   | Region | Coro1a            | 12721  | 7    | 120749505 | 120754485 | -    |
| 15692 | 1432524_at   | Region | 4930550G17Rik     | 75287  | 2    | 69741128  | 69743555  | +    |
| 15693 | 1427897_s_at | Region | 2400003N08Rik     | 71954  | 5    | 116220464 | 116244713 | -    |
| 15694 | 1452914_at   | Region | 2410024N18Rik     | 70229  | 5    | 149532332 | 149535114 | -    |
|       |              |        | 1110014K08Rik /// |        |      |           |           |      |
| 15695 | 1436747_at   | Region | LOC545968         | 319370 | 11   | 116255306 | 116259636 | +    |
| 15696 | 1452172_at   | Region | 2810421I24Rik     | 75619  | 1    | 64023669  | 64046403  | +    |
| 15697 | 1428187_at   | Region | Cd47              | 16423  | 16   | 48697237  | 48753271  | +    |
| 15698 | 1417372_a_at | Region | Peli1             | 67245  | 11   | 21030262  | 21045116  | +    |
| 15699 | 1440222_at   | Region | Sod1              | 20655  | 16   | 89378174  | 89383756  | +    |
| 15700 | 1430108_at   | Region | 9030622M22Rik     | 74547  | 8    | 60010682  | 60012667  | -    |
| 15701 | 1427027_a_at | Region | Gtf3a             | 66596  | 5    | 145840404 | 145847296 | +    |
| 15702 | 1458528_at   | Region | C330002I19Rik     | 77480  | 12   | 21526422  | 21612277  | +    |
| 15703 | 1458296_at   | Region | Ext1              | 14042  | 15   | 53068219  | 53345629  | -    |
| 15704 | 1425498_at   | Region | Prpf4b            | 19134  | 13   | 34407672  | 34435208  | +    |
| 15705 | 1438859_x_at | Region | Rps29             | 20090  | 12   | 65989514  | 65990859  | -    |
| 15706 | 1416764_at   | Region | Ttc11             | 66437  | 5    | 135975208 | 135979354 | +    |
| 15707 | 1436210_at   | Region | C330018K18Rik     | 235533 | 9    | 96018675  | 96082256  | +    |
| 15708 | 1436895_at   | Region | Centd1            | 212285 | 5    | 61409120  | 61555599  | -    |
| 15709 | 1444130_at   | Region | 1700081L11Rik     | 76719  | 11   | 104154591 | 104263380 | -    |
| 15710 | 1428771_at   | Region | 2410127E18Rik     | 76788  | 6    | 30449002  | 30501701  | +    |
| 15711 | 1424017_a_at | Region | Hint1             | 15254  | 11   | 54619279  | 54623337  | +    |
| 15712 | 1434574_at   | Region | 9430008C03Rik     | 68108  | 2    | 157812752 | 157815433 | -    |
| 15713 | 1445420_at   | Region | Mef2c             | 17260  | 13   | 79604158  | 79763912  | +    |
| 15714 | 1446069_at   | Region | D930036B08Rik     | 319713 | 18   | 62028204  | 62140635  | -    |
| 15715 | 1417570_at   | Region | Anapc1            | 17222  | 2    | 128126557 | 128201233 | -    |
| 15716 | 1456290_x_at | Region | Ccm2              | 216527 | 11   | 6441744   | 6491532   | +    |
| 15717 | 1451127_at   | Region | AW146242          | 232023 | 6    | 57914676  | 57987537  | -    |
| 15718 | 1423414_at   | Region | Ptgs1             | 19224  | 2    | 36162689  | 36184424  | +    |
| 15719 | 1460195_at   | Region | Mrps11            | 67994  | 7    | 72575418  | 72585096  | +    |
| 15720 | 1451981_at   | Region | Gtrgeo22          | 110012 | 10   | 79792045  | 79798647  | +    |
| 15721 | 1440155_at   | Region | Fstl4             | 320027 | 11   | 52517547  | 52940188  | +    |
| 15722 | 1456823_at   | Region | None              | None   | 12   | 73294080  | 73295580  | +    |
| 15723 | 1417494_a_at | Region | Cp                | 12870  | 3    | 19298453  | 19333864  | +    |
| 15724 | 1429484_at   | Region | 1110002L01Rik     | 68571  | 12   | 21189697  | 21191824  | -    |
| 15725 | 1444441_at   | Region | None              | None   | 11   | 98674110  | 98674746  | +    |
| 15726 | 1424006_at   | Region | 2310044P18Rik     | 69684  | 11   | 101227926 | 101238520 | -    |
| 15727 | 1441348_at   | Region | Zfp422-rs1        | 77652  | 17   | 30988427  | 31006091  | +    |
| 15728 | 1446809_at   | Region | B830045N13Rik     | 215378 | 1    | 146348134 | 146735852 | +    |
| 15729 | 1454617_at   | Region | Arrdc3            | 105171 | NONE | NONE      | NONE      | NONE |
| 15730 | 1436951_x_at | Region | Txndc9            | 98258  | 1    | 38279664  | 38291679  | -    |
| 15731 | 1452945_at   | Region | 2610020C11Rik     | 72154  | 5    | 137412978 | 137432168 | +    |
| 15732 | 1440825_s_at | Region | 1700009P13Rik     | 215814 | 10   | 18141400  | 18159451  | -    |
| 15733 | 1443974_at   | Region | Plcl1             | 227120 | 1    | 55707080  | 56052282  | +    |
| 15734 | 1437091_at   | Region | Accn4             | 241118 | 1    | 75741422  | 75765063  | +    |
| 15735 | 1434014_at   | Region | Atg4cl            | 242557 | 4    | 98169007  | 98234860  | +    |
| 15736 | 1428150_at   | Region | Coro7             | 78885  | 16   | 4297661   | 4351229   | -    |
| 15737 | 1417344_at   | Region | 2900064A13Rik     | 73024  | 2    | 112078263 | 112090674 | +    |
| 15738 | 1452255_at   | Region | Fbxo38            | 107035 | 18   | 62732972  | 62777526  | -    |
| 15739 | 1443520_at   | Region | None              | None   | NONE | NONE      | NONE      | NONE |
| 15740 | 1428677_at   | Region | Wdr73             | 71968  | 7    | 74693423  | 74704117  | -    |
| 15741 | 1423398_at   | Region | Taf12             | 66464  | 4    | 131071298 | 131090212 | +    |
| 15742 | 1424072_at   | Region | 2010107G23Rik     | 69894  | 10   | 62074258  | 62077615  | -    |
| 15743 | 1423772_x_at | Region | Slc25a5           | 11740  | X    | 31416206  | 31419360  | +    |
| 15744 | 1438255_at   | Region | Ches1             | 71375  | 12   | 94622265  | 94816088  | -    |
| 15745 | 1419542_at   | Region | Dazl              | 13164  | 17   | 47811864  | 47826062  | -    |
| 15746 | 1419803_s_at | Region | Ccdc12            | 72654  | 9    | 110697800 | 110752851 | +    |
| 15747 | 1450556_at   | Region | Spnb1             | 20741  | 12   | 73452717  | 73566610  | -    |
| 15748 | 1451172_at   | Region | 1200015A19Rik     | 67808  | 4    | 152649850 | 152653028 | -    |
| 15749 | 1417615_a_at | Region | Rpl11             | 67025  | 4    | 134931205 | 134934628 | -    |

|       |              |        |               |        |    |           |           |   |
|-------|--------------|--------|---------------|--------|----|-----------|-----------|---|
| 15750 | 1455939_x_at | Region | Srp14         | 20813  | 2  | 117989699 | 117993510 | - |
| 15751 | 1425344_at   | Region | 4430402O11Rik | 67608  | 11 | 121058346 | 121076948 | + |
| 15752 | 1436510_a_at | Region | Lrrfp2        | 71268  | 9  | 111159058 | 111266964 | + |
| 15753 | 1428157_at   | Region | Gng2          | 14702  | 14 | 18235904  | 18323407  | - |
| 15754 | 1428496_at   | Region | Secisbp2      | 75420  | 13 | 50205381  | 50237727  | + |
| 15755 | 1435063_at   | Region | None          | None   | 4  | 137275353 | 137275963 | - |
| 15756 | 1446606_at   | Region | D730045B01Rik | 77867  | 5  | 150306312 | 150335251 | - |
| 15757 | 1448515_at   | Region | Tsn           | 22099  | 1  | 118048034 | 118060649 | - |
| 15758 | 1457821_at   | Region | 2610511M17Rik | 74206  | 7  | 24734241  | 24734571  | - |
| 15759 | 1443009_at   | Region | None          | None   | 6  | 88427101  | 88427749  | + |
| 15760 | 1458271_at   | Region | None          | None   | 9  | 9680542   | 9681032   | - |
| 15761 | 1421064_at   | Region | Mpp5          | 56217  | 12 | 75605620  | 75694686  | + |
| 15762 | 1440905_at   | Region | Hs2st1        | 23908  | 3  | 143402785 | 143541813 | - |
| 15763 | 1429538_a_at | Region | 5730406M06Rik | 66625  | 4  | 21916954  | 21945846  | + |
| 15764 | 1455706_at   | Region | Stxbp4        | 20913  | 11 | 90301004  | 90459167  | - |
| 15765 | 1431893_a_at | Region | Tprt          | 56075  | 2  | 22857432  | 22877326  | + |
| 15766 | 1457427_at   | Region | Gm573         | 230959 | 4  | 151904613 | 151975173 | - |
| 15767 | 1429389_at   | Region | Setmar        | 74729  | 6  | 108566600 | 108578667 | + |
| 15768 | 1427730_a_at | Region | Zfp148        | 22661  | 16 | 32188918  | 32308456  | + |
| 15769 | 1428364_at   | Region | Scnm1         | 69269  | 3  | 94617550  | 94621819  | - |
| 15770 | 1440740_at   | Region | D2Ert485e     | 329506 | 2  | 121470306 | 121527439 | + |
| 15771 | 1453766_a_at | Region | 4931407K02Rik | 77627  | 15 | 83915311  | 84113948  | - |
| 15772 | 1460329_at   | Region | B4galt6       | 56386  | 18 | 20900931  | 20961332  | - |
| 15773 | 1430356_at   | Region | 2210402A03Rik | 72280  | 2  | 22923798  | 22925595  | - |
| 15774 | 1445031_at   | Region | None          | None   | 1  | 39762189  | 39762932  | - |
| 15775 | 1433746_at   | Region | Wdr3          | 269470 | 3  | 99564091  | 99588300  | - |
| 15776 | 1426518_at   | Region | Tubgcp5       | 233276 | 7  | 50063625  | 50100924  | + |
| 15777 | 1418568_x_at | Region | Srp14         | 20813  | 2  | 117989699 | 117993510 | - |
| 15778 | 1427058_at   | Region | Eif4a1        | 13681  | 11 | 69392597  | 69397973  | - |
| 15779 | 1442435_at   | Region | None          | None   | 11 | 74810860  | 74811395  | + |
| 15780 | 1434553_at   | Region | 4930577M16Rik | 99887  | 3  | 119983678 | 120044986 | - |
| 15781 | 1443044_at   | Region | A830091E24    | 414271 | 11 | 46045436  | 46046132  | - |
| 15782 | 1453448_at   | Region | 2310067E19Rik | 76455  | 4  | 81440974  | 81444291  | - |
| 15783 | 1455606_at   | Region | BC004022      | 80750  | 8  | 86124928  | 86125904  | - |
| 15784 | 1453093_at   | Region | Rasgef1c      | 74563  | 11 | 49654692  | 49733064  | + |
| 15785 | 1455769_at   | Region | None          | None   | 9  | 7172707   | 7174201   | - |
| 15786 | 1424392_at   | Region | Adhfe1        | 76187  | 1  | 9652849   | 9682760   | + |
| 15787 | 1420730_a_at | Region | Tcp11         | 21463  | 17 | 25862669  | 25876483  | - |
| 15788 | 1424753_at   | Region | Nudt14        | 66174  | 12 | 108410830 | 108418215 | - |
| 15789 | 1417903_at   | Region | Dfna5h        | 54722  | 6  | 50351935  | 50406301  | - |
| 15790 | 1416637_at   | Region | Slc4a2        | 20535  | 5  | 22889216  | 22904842  | + |
| 15791 | 1429313_at   | Region | Ror1          | 26563  | 4  | 99054696  | 99401450  | + |
| 15792 | 1452068_at   | Region | Asahl         | 67111  | 5  | 91594004  | 91613926  | - |
| 15793 | 1436412_at   | Region | None          | None   | 2  | 83364553  | 83365467  | + |
| 15794 | 1443589_at   | Region | DXErt4242e    | 52175  | X  | 159854060 | 159854549 | + |
| 15795 | 1424154_a_at | Region | Hbld1         | 74316  | 12 | 81641945  | 81643760  | + |
| 15796 | 1415672_at   | Region | Golga7        | 57437  | 8  | 21995926  | 22011591  | - |
| 15797 | 1431035_at   | Region | Daam1         | 208846 | 12 | 68668036  | 68829803  | + |
| 15798 | 1460187_at   | Region | Sfrp1         | 20377  | 8  | 22166110  | 22202536  | + |
| 15799 | 1433677_at   | Region | Sfrs8         | 231769 | 5  | 128676882 | 128691989 | + |
| 15800 | 1428390_at   | Region | Wdr43         | 72515  | 17 | 69392451  | 69435728  | + |
| 15801 | 1456583_x_at | Region | 5730537D05Rik | 70652  | 3  | 79543274  | 79572782  | - |
| 15802 | 1432944_at   | Region | 2900046L07Rik | 73027  | 15 | 44662072  | 44663876  | - |
| 15803 | 1460602_at   | Region | Dlc1          | 50768  | 8  | 35376686  | 35421146  | - |
| 15804 | 1452085_at   | Region | Gatad1        | 67210  | 5  | 3645974   | 3653922   | - |
| 15805 | 1458532_at   | Region | Mtr           | 238505 | 13 | 12226977  | 12293945  | - |
| 15806 | 1455521_at   | Region | Klf12         | 16597  | 14 | 94399045  | 94678209  | - |
| 15807 | 1446065_at   | Region | Kcnd2         | 16508  | 6  | 21263145  | 21776841  | + |
| 15808 | 1456479_at   | Region | 4732481H14Rik | 209131 | 4  | 59749298  | 59843221  | + |
| 15809 | 1451063_at   | Region | Stxbp4        | 20913  | 11 | 90301004  | 90459167  | - |
| 15810 | 1419917_s_at | Region | Tmed7         | 66676  | 18 | 46809246  | 46819270  | - |
| 15811 | 1434341_x_at | Region | 1110020P15Rik | 66152  | 11 | 4596760   | 4599115   | - |
| 15812 | 1428839_at   | Region | Wdr53         | 68980  | 16 | 31056657  | 31066443  | + |
| 15813 | 1443400_at   | Region | 4933425I22Rik | 71148  | 4  | 102074543 | 102121674 | + |
| 15814 | 1429679_at   | Region | Lrrc17        | 74511  | 5  | 19995827  | 20028265  | + |

|       |              |        |                             |        |      |           |           |      |
|-------|--------------|--------|-----------------------------|--------|------|-----------|-----------|------|
| 15815 | 1445329_at   | Region | Dtnb                        | 13528  | 12   | 2476      | 11394     | +    |
| 15816 | 1449683_x_at | Region | 2410129E14Rik               | 73710  | 13   | 33661517  | 33664863  | -    |
| 15817 | 1429136_at   | Region | 1700052K11Rik               | 73431  | 11   | 105000913 | 105002522 | -    |
| 15818 | 1456277_at   | Region | 7530414M10Rik               | 320374 | NONE | NONE      | NONE      | NONE |
| 15819 | 1433849_at   | Region | Cdc27                       | 217232 | 11   | 104326687 | 104371504 | -    |
| 15820 | 1434770_at   | Region | Iqcb1                       | 320299 | 16   | 35645833  | 35690138  | +    |
| 15821 | 1434513_at   | Region | Gm542                       | 224087 | 16   | 29120345  | 29123528  | -    |
| 15822 | 1428849_at   | Region | Rps6kb1                     | 72508  | 11   | 86241975  | 86272766  | -    |
| 15823 | 1458183_at   | Region | None                        | None   | NONE | NONE      | NONE      | NONE |
| 15824 | 1418194_at   | Region | Galnt10                     | 171212 | 11   | 57371071  | 57513130  | +    |
| 15825 | 1422117_s_at | Region | Khdrbs2                     | 170771 | 1    | 32445071  | 32930005  | +    |
| 15826 | 1422557_s_at | Region | Mt1                         | 17748  | 8    | 93463399  | 93464496  | +    |
| 15827 | 1439536_at   | Region | Al846133                    | 103847 | 11   | 74553328  | 74554192  | +    |
| 15828 | 1448141_at   | Region | 1110014J01Rik               | 74778  | 15   | 83164108  | 83173438  | -    |
| 15829 | 1420095_s_at | Region | Zipro1                      | 22697  | 5    | 137090159 | 137106967 | +    |
| 15830 | 1460243_at   | Region | Sptlc2                      | 20773  | 12   | 84187587  | 84267928  | -    |
| 15831 | 1447948_at   | Region | A430107O13Rik               | 214642 | 6    | 22056746  | 22284808  | +    |
| 15832 | 1418847_at   | Region | Arg2                        | 11847  | 12   | 75987226  | 76012698  | +    |
| 15833 | 1428907_at   | Region | 2600011C06Rik               | 67039  | 12   | 80506670  | 80547102  | +    |
| 15834 | 1418915_at   | Region | 1810037K07Rik               | 67096  | 4    | 115661340 | 115667226 | -    |
| 15835 | 1449863_a_at | Region | Dlx5                        | 13395  | 6    | 6850562   | 6854825   | -    |
| 15836 | 1428033_at   | Region | None                        | None   | NONE | NONE      | NONE      | NONE |
| 15837 | 1416921_x_at | Region | Aldoa                       | 11674  | 7    | 120844967 | 120848914 | -    |
| 15838 | 1448477_at   | Region | Chst12                      | 59031  | 5    | 139504038 | 139524070 | +    |
| 15839 | 1450638_at   | Region | Pdcd5                       | 56330  | 7    | 30805587  | 30811064  | -    |
| 15840 | 1435029_at   | Region | B230120H23Rik               | 65964  | 2    | 71983520  | 72140353  | +    |
| 15841 | 1449966_s_at | Region | Cab39l                      | 69008  | 14   | 53976044  | 54083966  | +    |
| 15842 | 1450997_at   | Region | Stk17b                      | 98267  | 1    | 54063026  | 54092666  | -    |
| 15843 | 1440787_s_at | Region | 1300007O09Rik               | 71769  | 10   | 110921530 | 110929949 | +    |
| 15844 | 1439609_at   | Region | None                        | None   | 1    | 78502311  | 78502943  | -    |
| 15845 | 1459628_at   | Region | 9630048M01Rik               | 320158 | 8    | 22424307  | 22817717  | +    |
| 15846 | 1437958_at   | Region | Xpr1                        | 19775  | 1    | 155171522 | 155308066 | -    |
| 15847 | 1452808_at   | Region | Rnut1                       | 66069  | 9    | 57064413  | 57096688  | +    |
| 15848 | 1446847_at   | Region | 0610010D24Rik               | 68339  | 12   | 96358158  | 96474441  | -    |
| 15849 | 1427542_at   | Region | 5330439J01Rik               | 109205 | 10   | 43127348  | 43280569  | -    |
| 15850 | 1424254_at   | Region | Ifitm1                      | 68713  | 7    | 135297162 | 135371805 | +    |
| 15851 | 1457677_at   | Region | BC057593                    | 240067 | 17   | 30818041  | 30830148  | +    |
| 15852 | 1449252_at   | Region | 9030611O19Rik               | 104943 | 12   | 27650830  | 27656802  | +    |
| 15853 | 1451195_a_at | Region | Txndc1                      | 72736  | 12   | 67285315  | 67299785  | +    |
| 15854 | 1440261_at   | Region | Ap4e1                       | 108011 | 2    | 126522583 | 126581762 | +    |
| 15855 | 1437869_at   | Region | 3222402P14Rik               | 235542 | 9    | 101055227 | 101161626 | -    |
| 15856 | 1451631_at   | Region | BC021395                    | 225283 | 18   | 24716439  | 24758615  | -    |
| 15857 | 1425026_at   | Region | SFT2 domain<br>containing 2 | 108735 | 1    | 165097432 | 165117255 | -    |
| 15858 | 1417516_at   | Region | Ddit3                       | 13198  | 10   | 127027446 | 127032923 | +    |
| 15859 | 1431751_a_at | Region | 2700082O15Rik               | 77015  | 2    | 106432845 | 106487143 | +    |
| 15860 | 1433700_at   | Region | 4933433P14Rik               | 66787  | 12   | 101145518 | 101150041 | +    |
| 15861 | 1425834_a_at | Region | Gpam                        | 14732  | 19   | 54649974  | 54679691  | -    |
| 15862 | 1431320_a_at | Region | Myo5a                       | 17918  | 9    | 75209875  | 75357058  | +    |
| 15863 | 1425616_a_at | Region | 2410005K17Rik               | 69216  | 4    | 118154314 | 118160203 | +    |
| 15864 | 1458309_at   | Region | 2900024P20Rik               | 208440 | 13   | 9260573   | 9652519   | +    |
| 15865 | 1424166_at   | Region | Msh3                        | 17686  | 13   | 88508019  | 88521294  | -    |
| 15866 | 1421925_at   | Region | Mapk11                      | 19094  | 15   | 89194712  | 89201863  | -    |
| 15867 | 1422574_at   | Region | Mxd4                        | 17122  | 5    | 32664918  | 32676048  | -    |
| 15868 | 1423441_at   | Region | Tfb2m /// Gm1818            | 15278  | 1    | 179482301 | 179500463 | -    |
| 15869 | 1423539_at   | Region | Pms2                        | 18861  | 5    | 142951583 | 142973057 | +    |
| 15870 | 1417646_a_at | Region | Snx5                        | 69178  | 2    | 143707062 | 143727467 | -    |
| 15871 | 1452057_at   | Region | Actr1b                      | 226977 | 1    | 36993793  | 37004516  | -    |
| 15872 | 1431442_at   | Region | 2310047B19Rik               | 66962  | 9    | 21845743  | 21848244  | +    |
| 15873 | 1427557_at   | Region | Alg12                       | 223774 | 15   | 88857174  | 88871213  | -    |
| 15874 | 1435475_at   | Region | Lman2l                      | 214895 | 1    | 36717777  | 36719487  | -    |
| 15875 | 1425436_x_at | Region | Klra3                       | 16634  | 6    | 131077951 | 131092195 | -    |
| 15876 | 1448579_at   | Region | Glg1                        | 20340  | 8    | 110455266 | 110556791 | -    |
| 15877 | 1428442_at   | Region | Mmp24                       | 17391  | 2    | 155232322 | 155273266 | +    |
| 15878 | 1426717_at   | Region | Nipa2                       | 93790  | 7    | 50201064  | 50231927  | -    |

|       |              |        |               |        |      |           |           |      |
|-------|--------------|--------|---------------|--------|------|-----------|-----------|------|
| 15879 | 1457607_at   | Region | AW046457      | 103409 | NONE | NONE      | NONE      | NONE |
| 15880 | 1456521_at   | Region | None          | None   | 1    | 136691336 | 136692204 | -    |
| 15881 | 1455894_at   | Region | A230072I16Rik | 217057 | 11   | 86411975  | 86420315  | +    |
| 15882 | 1416917_at   | Region | 1700123O20Rik | 58248  | 14   | 49203053  | 49207567  | +    |
| 15883 | 1429026_at   | Region | Hexim2        | 71059  | 11   | 102954403 | 102960965 | +    |
| 15884 | 1428405_at   | Region | Hcfc1r1       | 353502 | 17   | 21475788  | 21477704  | +    |
| 15885 | 1438362_x_at | Region | 2310035C23Rik | 227446 | 1    | 105555177 | 105695178 | +    |
| 15886 | 1437268_at   | Region | LancI3        | 236285 | X    | 7438913   | 7507025   | +    |
| 15887 | 1449645_s_at | Region | Cct3          | 12462  | 3    | 88040999  | 88065630  | +    |
| 15888 | 1457215_at   | Region | None          | None   | 4    | 153136457 | 153137079 | +    |
| 15889 | 1427713_x_at | Region | Pou2f2        | 18987  | 7    | 20270879  | 20309756  | -    |
| 15890 | 1451462_a_at | Region | lfnar2        | 15976  | 16   | 90530631  | 90563104  | +    |
| 15891 | 1441726_at   | Region | Clasp2        | 76499  | 9    | 113865413 | 113971281 | +    |
| 15892 | 1415695_at   | Region | Psma1         | 26440  | 7    | 108067002 | 108132938 | -    |
| 15893 | 1441977_at   | Region | 9630023C09Rik | 320378 | 11   | 44494449  | 44494985  | +    |
| 15894 | 1428756_at   | Region | Aasdhppt      | 67618  | 9    | 4203626   | 4217037   | -    |
| 15895 | 1424755_at   | Region | Hip1          | 215114 | 5    | 134421518 | 134558607 | -    |
| 15896 | 1434462_at   | Region | BC088983      | 382010 | 8    | 55586179  | 55605223  | -    |
| 15897 | 1435486_at   | Region | Pak3          | 18481  | X    | 137105791 | 137231857 | +    |
| 15898 | 1455642_a_at | Region | Tspan17       | 74257  | 13   | 53396633  | 53403940  | +    |
| 15899 | 1425327_at   | Region | BC008163      | 230789 | 4    | 131861517 | 131883410 | -    |
| 15900 | 1425899_a_at | Region | Its1          | 16443  | 16   | 90939437  | 91069253  | +    |
| 15901 | 1454067_a_at | Region | 4931406C07Rik | 70984  | 9    | 15120247  | 15138698  | -    |
| 15902 | 1436009_at   | Region | Usp30         | 100756 | 5    | 113210959 | 113234147 | +    |
| 15903 | 1452534_a_at | Region | Hmgb2         | 97165  | 8    | 56551079  | 56553720  | +    |
| 15904 | 1423206_s_at | Region | 2310003F16Rik | 67693  | 2    | 120970950 | 120972288 | +    |
| 15905 | 1437446_at   | Region | Rab5b         | 19344  | 10   | 128414967 | 128433354 | -    |
| 15906 | 1416765_s_at | Region | MGI:1913699   | 66449  | 16   | 4287970   | 4296450   | -    |
| 15907 | 1456286_at   | Region | Cog3          | 338337 | 14   | 70044865  | 70097010  | -    |
| 15908 | 1426817_at   | Region | Mki67         | 17345  | 7    | 130056691 | 130084009 | -    |
| 15909 | 1431202_at   | Region | Herc3         | 73998  | 6    | 58996163  | 59083005  | +    |
| 15910 | 1427055_at   | Region | 4921507I02Rik | 75778  | 3    | 12891     | 32732     | +    |
| 15911 | 1442560_at   | Region | Mgll          | 23945  | 6    | 89159883  | 89263412  | +    |
| 15912 | 1445081_at   | Region | A930041I02Rik | 320271 | 2    | 39006211  | 39122887  | -    |
| 15913 | 1417190_at   | Region | Pbef1         | 59027  | 12   | 29426677  | 29457809  | +    |
| 15914 | 1424639_a_at | Region | Hmgcl         | 15356  | 4    | 134827702 | 134843870 | +    |
| 15915 | 1435230_at   | Region | Ankrd12       | 106585 | 17   | 63676340  | 63693124  | -    |
| 15916 | 1439467_at   | Region | Mtap4         | 17758  | 9    | 109957034 | 110109905 | +    |
| 15917 | 1421631_at   | Region | Pcdhb1        | 93872  | 18   | 37488720  | 37491176  | +    |
| 15918 | 1417752_at   | Region | Coro1c        | 23790  | 5    | 112953083 | 113019350 | -    |
| 15919 | 1435192_at   | Region | None          | None   | X    | 55559962  | 55560671  | -    |
| 15920 | 1448754_at   | Region | Rbp1          | 19659  | 9    | 98322319  | 98345909  | +    |
| 15921 | 1456295_at   | Region | B230114P17Rik | 402735 | 10   | 106821116 | 106821943 | -    |
| 15922 | 1456364_at   | Region | C230057M02Rik | 319463 | 8    | 122106516 | 122136298 | -    |
| 15923 | 1434539_at   | Region | Lrrn3         | 16981  | 12   | 38061114  | 38095055  | -    |
| 15924 | 1429209_at   | Region | Col23a1       | 237759 | 11   | 51042761  | 51333951  | +    |
| 15925 | 1455607_at   | Region | Thsd2         | 72780  | 10   | 29483782  | 29567151  | -    |
| 15926 | 1427317_at   | Region | Kin           | 16588  | 2    | 9996726   | 10008815  | +    |
| 15927 | 1452706_a_at | Region | 1700027J05Rik | 69440  | 15   | 89237134  | 89248812  | -    |
| 15928 | 1447448_s_at | Region | None          | None   | 13   | 5757516   | 5757917   | +    |
| 15929 | 1428106_at   | Region | 1300001I01Rik | 74148  | 11   | 74375253  | 74396505  | +    |
| 15930 | 1430205_a_at | Region | Cdc37I1       | 67072  | 19   | 28243091  | 28270166  | +    |
| 15931 | 1433862_at   | Region | Espl1         | 105988 | 15   | 102381118 | 102384834 | +    |
| 15932 | 1456070_at   | Region | 5430405N12Rik | 71324  | 14   | 10701821  | 10702250  | +    |
| 15933 | 1458899_at   | Region | Usp53         | 99526  | 3    | 121722848 | 121773789 | -    |
| 15934 | 1457184_at   | Region | 4930488L10Rik | 319710 | 12   | 67659295  | 67737242  | +    |
| 15935 | 1434825_at   | Region | LOC381742     | 381742 | 5    | 141738255 | 141754415 | -    |
| 15936 | 1417510_at   | Region | Vps4a         | 116733 | 8    | 106329013 | 106343443 | +    |
| 15937 | 1450015_x_at | Region | Sgpp1         | 81535  | 12   | 72570627  | 72592022  | -    |
| 15938 | 1423715_a_at | Region | Nedd8         | 18002  | 14   | 50180280  | 50189888  | -    |
| 15939 | 1450450_at   | Region | Dscr1I2       | 53902  | 4    | 134293565 | 134306678 | -    |
| 15940 | 1419502_at   | Region | D11Lgp1e      | 80860  | 11   | 100587419 | 100592044 | -    |
| 15941 | 1428803_at   | Region | 4632408A20Rik | 217700 | 12   | 80965095  | 80975660  | +    |
| 15942 | 1426641_at   | Region | Trib2         | 217410 | 12   | 15150515  | 15175525  | -    |
| 15943 | 1427146_at   | Region | AI790298      | 107239 | 19   | 3953116   | 3954804   | -    |

|       |              |        |               |        |    |           |           |   |
|-------|--------------|--------|---------------|--------|----|-----------|-----------|---|
| 15944 | 1455619_at   | Region | BC062258      | 408063 | 4  | 98890802  | 98891227  | + |
| 15945 | 1450885_at   | Region | Dffa          | 13347  | 4  | 147596613 | 147610300 | + |
| 15946 | 1430833_at   | Region | Itk           | 16428  | 11 | 46077990  | 46142337  | - |
| 15947 | 1439302_at   | Region | 5730469D23Rik | 231380 | 5  | 85372730  | 85434753  | - |
| 15948 | 1425516_at   | Region | Ogt           | 108155 | X  | 96241425  | 96285710  | + |
| 15949 | 1448601_s_at | Region | Msx1          | 17701  | 5  | 36327006  | 36330969  | - |
| 15950 | 1426813_at   | Region | 2610020N02Rik | 353258 | 10 | 13059813  | 13074795  | - |
| 15951 | 1426665_at   | Region | Katnb1        | 74187  | 8  | 94365461  | 94384047  | + |
| 15952 | 1451188_at   | Region | Wdr26         | 226757 | 1  | 181127684 | 181165201 | - |
| 15953 | 1429403_x_at | Region | Glt8d2        | 74782  | 10 | 82538402  | 82578619  | - |
| 15954 | 1451214_at   | Region | Kbtbd2        | 210973 | 6  | 56921849  | 56924634  | - |
| 15955 | 1444709_at   | Region | Invs          | 16348  | 4  | 48195745  | 48347875  | + |
| 15956 | 1437773_x_at | Region | Ddx17         | 67040  | 15 | 79580294  | 79599072  | - |
| 15957 | 1425067_at   | Region | Celsr3        | 107934 | 9  | 108872851 | 108898805 | + |
| 15958 | 1422433_s_at | Region | Idh1          | 15926  | 1  | 65452617  | 65473274  | - |
| 15959 | 1455597_at   | Region | Al585793      | 106920 | 18 | 32473196  | 32476895  | + |
| 15960 | 1436092_at   | Region | None          | None   | 15 | 75795559  | 75796148  | - |
| 15961 | 1450332_s_at | Region | Fmo5          | 14263  | 3  | 97115149  | 97138825  | + |
| 15962 | 1416891_at   | Region | Numb          | 18222  | 12 | 80659465  | 80706369  | - |
| 15963 | 1420851_at   | Region | Pard6g        | 93737  | 18 | 80170776  | 80242901  | + |
| 15964 | 1458053_at   | Region | Abi2          | 329165 | 1  | 60713087  | 60784447  | + |
| 15965 | 1422194_at   | Region | Scn5a         | 20271  | 9  | 119479491 | 119556933 | - |
| 15966 | 1436382_at   | Region | Zbtb12        | 193736 | 17 | 32597418  | 32599703  | + |
| 15967 | 1449548_at   | Region | Efnb2         | 13642  | 8  | 7983291   | 8026630   | - |
| 15968 | 1434081_at   | Region | Ap1g1         | 11765  | 8  | 109076386 | 109159034 | + |
| 15969 | 1436559_a_at | Region | Psmd10        | 53380  | X  | 134493477 | 134501620 | - |
| 15970 | 1418406_at   | Region | Pde8a         | 18584  | 7  | 75020032  | 75142088  | + |
| 15971 | 1447842_x_at | Region | Tcn2          | 21452  | 11 | 3811977   | 3826370   | - |
| 15972 | 1428025_s_at | Region | Pitpnc1       | 71795  | 11 | 107033195 | 107291788 | - |
| 15973 | 1428654_at   | Region | 1200016B10Rik | 66875  | 1  | 151223449 | 151284131 | - |
| 15974 | 1428710_at   | Region | Rit1          | 19769  | 3  | 88460728  | 88473591  | + |
| 15975 | 1425238_at   | Region | None          | None   | 9  | 22220525  | 22221040  | - |
| 15976 | 1437433_at   | Region | B3galt2       | 26878  | 1  | 143472806 | 143481893 | + |
| 15977 | 1456832_at   | Region | Atrx          | 22589  | X  | 100401518 | 100530707 | - |
| 15978 | 1426686_s_at | Region | Map3k3        | 26406  | 11 | 105918079 | 105976535 | + |
| 15979 | 1426647_at   | Region | 9130011J15Rik | 66818  | 8  | 71716686  | 71721857  | - |
| 15980 | 1419172_at   | Region | Dhfr          | 13361  | 13 | 88522409  | 88553836  | + |
| 15981 | 1445201_at   | Region | Zfp53         | 24132  | 17 | 19358540  | 19379787  | + |
| 15982 | 1439556_at   | Region | Ncam1         | 17967  | 9  | 49555319  | 49607941  | - |
| 15983 | 1422859_a_at | Region | Rpl23         | 65019  | 11 | 97598630  | 97603460  | - |
| 15984 | 1440867_at   | Region | Spry4         | 24066  | 18 | 38809987  | 38824990  | - |
| 15985 | 1429600_at   | Region | 1110019K23Rik | 68621  | 5  | 90247014  | 90341747  | + |
| 15986 | 1446233_at   | Region | Adarb2        | 94191  | 13 | 8160097   | 8716266   | + |
| 15987 | 1434316_at   | Region | Chsy1         | 269941 | 7  | 59993739  | 60058012  | + |
| 15988 | 1420861_at   | Region | Dctn4         | 67665  | 18 | 60751547  | 60784088  | + |
| 15989 | 1453005_at   | Region | Prpf31        | 68988  | 7  | 10280102  | 10281569  | + |
| 15990 | 1423678_at   | Region | BC017643      | 217370 | 11 | 121043681 | 121050358 | - |
| 15991 | 1442397_at   | Region | Nfx1          | 74164  | 4  | 41109832  | 41164029  | + |
| 15992 | 1435250_at   | Region | 2810013E07Rik | 72656  | 4  | 11126123  | 11181194  | - |
| 15993 | 1434337_at   | Region | Cklfsf4       | 97487  | 8  | 103648852 | 103690032 | - |
| 15994 | 1455494_at   | Region | None          | None   | 11 | 94773711  | 94774134  | + |
| 15995 | 1415992_at   | Region | Pigo          | 56703  | 4  | 42933560  | 42941678  | - |
| 15996 | 1438675_at   | Region | Sfrs8         | 231769 | 5  | 128676882 | 128691989 | + |
| 15997 | 1427600_at   | Region | Tnfrsf19      | 29820  | 14 | 55499179  | 55581612  | - |
| 15998 | 1435591_at   | Region | Al426330      | 101563 | 7  | 23592212  | 23593020  | + |
| 15999 | 1427024_at   | Region | 5033405K12Rik | 75991  | 5  | 71731074  | 71761395  | + |
| 16000 | 1448830_at   | Region | Dusp1         | 19252  | 17 | 24300425  | 24303295  | - |
| 16001 | 1424453_at   | Region | Pcyt1a        | 13026  | 16 | 31261076  | 31281386  | + |
| 16002 | 1428246_at   | Region | 2310075A12Rik | 69091  | 9  | 26901688  | 26924026  | - |
| 16003 | 1441396_at   | Region | B3galt1       | 26877  | 2  | 67973343  | 67974323  | + |
| 16004 | 1423403_at   | Region | Mapkbp1       | 26390  | 2  | 119486752 | 119539188 | + |
| 16005 | 1435574_at   | Region | None          | None   | 9  | 18157144  | 18158439  | + |
| 16006 | 1423378_at   | Region | Adam23        | 23792  | 1  | 63739150  | 63885988  | + |
| 16007 | 1435143_at   | Region | Elk3          | 13713  | 10 | 93221365  | 93283561  | - |
| 16008 | 1430187_at   | Region | 6330516O17Rik | 76165  | 7  | 23126638  | 23127862  | + |

|       |              |        |                  |        |      |           |           |      |
|-------|--------------|--------|------------------|--------|------|-----------|-----------|------|
| 16009 | 1424643_at   | Region | Tcof1            | 21453  | 18   | 61039868  | 61074234  | -    |
| 16010 | 1417311_at   | Region | Crip2            | 68337  | 12   | 108616717 | 108621647 | +    |
| 16011 | 1415825_s_at | Region | 1810073N04Rik    | 72055  | 11   | 119925064 | 119972367 | -    |
| 16012 | 1417915_at   | Region | Rap2b            | 74012  | 3    | 61043051  | 61046895  | +    |
| 16013 | 1455054_a_at | Region | Tes3-ps /// Tes3 | 114893 | 3    | 35346474  | 35374678  | -    |
| 16014 | 1460412_at   | Region | 1600015H20Rik    | 70370  | 2    | 128377831 | 128409656 | +    |
| 16015 | 1452880_at   | Region | Trip3            | 448850 | 11   | 84638947  | 84644348  | -    |
| 16016 | 1439119_a_at | Region | BC010304         | 218236 | 13   | 48508119  | 48513447  | -    |
| 16017 | 1424666_at   | Region | 5430405G24Rik    | 237943 | 11   | 102298304 | 102329534 | -    |
| 16018 | 1458551_at   | Region | None             | None   | 13   | 79729799  | 79730830  | +    |
| 16019 | 1421013_at   | Region | Pitpnb           | 56305  | 5    | 110380456 | 110438052 | +    |
| 16020 | 1428751_at   | Region | Pacrg            | 69310  | 17   | 9043067   | 9480290   | -    |
| 16021 | 1427148_at   | Region | Pja2             | 224938 | 17   | 61986425  | 62035635  | -    |
| 16022 | 1449058_at   | Region | Gli1             | 14632  | 10   | 127066522 | 127078216 | -    |
| 16023 | 1453173_at   | Region | 2310005E10Rik    | 67861  | 6    | 34478555  | 34491217  | +    |
| 16024 | 1420495_a_at | Region | Vps26            | 30930  | 10   | 62421607  | 62453087  | -    |
| 16025 | 1434491_a_at | Region | Cox6c            | 12864  | 15   | 35933506  | 35939687  | -    |
| 16026 | 1455820_x_at | Region | Scarb1           | 20778  | 5    | 124438866 | 124503358 | -    |
| 16027 | 1433448_at   | Region | B430110G05Rik    | 229517 | 3    | 88154362  | 88168982  | -    |
| 16028 | 1423212_at   | Region | Phc1             | 13619  | 6    | 122978698 | 122997967 | -    |
| 16029 | 1425429_s_at | Region | Hif3a            | 53417  | 7    | 13986645  | 14007590  | -    |
| 16030 | 1424981_at   | Region | Nln              | 75805  | 13   | 100241399 | 100327761 | -    |
| 16031 | 1457038_at   | Region | None             | None   | 3    | 53148159  | 53149746  | -    |
| 16032 | 1418536_at   | Region | LOC386462        | 386462 | 17   | 1644305   | 1648794   | +    |
| 16033 | 1436099_at   | Region | AI836003         | 239650 | 15   | 98243222  | 98245696  | +    |
| 16034 | 1436675_at   | Region | Wdr63            | 242253 | 3    | 145014992 | 145083811 | -    |
| 16035 | 1425649_at   | Region | Slc39a14         | 213053 | 14   | 64619456  | 64667414  | -    |
| 16036 | 1416662_at   | Region | Sardh            | 192166 | 2    | 27121544  | 27178974  | -    |
| 16037 | 1444402_at   | Region | C230027N18Rik    | 330940 | 9    | 52184293  | 52185019  | -    |
| 16038 | 1450028_a_at | Region | Lancl2           | 71835  | 6    | 57865048  | 57900894  | +    |
| 16039 | 1457749_at   | Region | Cc2d1b           | 319965 | 4    | 107578861 | 107593027 | +    |
| 16040 | 1445742_at   | Region | None             | None   | 11   | 74651781  | 74652998  | +    |
| 16041 | 1449017_at   | Region | Nutl2            | 68051  | 8    | 105156479 | 105176249 | +    |
| 16042 | 1456343_at   | Region | Slc35f1          | 215085 | 10   | 52933079  | 53356820  | +    |
| 16043 | 1458126_at   | Region | D030041H20Rik    | 320036 | 14   | 23928909  | 23929270  | +    |
| 16044 | 1416714_at   | Region | lcsbp1           | 15900  | 8    | 120093722 | 120114040 | +    |
| 16045 | 1452819_at   | Region | Lphn3            | 319387 | 5    | 80275281  | 81049432  | +    |
| 16046 | 1416421_a_at | Region | Ssb              | 20823  | 2    | 69717028  | 69727204  | +    |
| 16047 | 1455076_a_at | Region | 4933424B01Rik    | 71177  | 6    | 147470322 | 147498449 | -    |
| 16048 | 1426481_at   | Region | Klhl22           | 224023 | 16   | 16530639  | 16564348  | +    |
| 16049 | 1418316_a_at | Region | Mark3            | 17169  | 12   | 107049977 | 107134146 | +    |
| 16050 | 1445922_at   | Region | Xrcc4            | 108138 | 13   | 85965021  | 86189500  | -    |
| 16051 | 1443162_at   | Region | None             | None   | 4    | 57156503  | 57157176  | -    |
| 16052 | 1447696_x_at | Region | Adcy5            | 224129 | 16   | 34087039  | 34087315  | +    |
| 16053 | 1423217_a_at | Region | 2510049I19Rik    | 67922  | 8    | 71378153  | 71382197  | +    |
| 16054 | 1456711_at   | Region | 4932425I24Rik    | 320214 | 16   | 37114992  | 37159933  | -    |
| 16055 | 1426027_a_at | Region | Arhgap10         | 78514  | 8    | 76458897  | 76659183  | -    |
| 16056 | 1424362_at   | Region | D830019K17Rik    | 227721 | 2    | 32027813  | 32042982  | +    |
| 16057 | 1445248_at   | Region | None             | None   | NONE | NONE      | NONE      | NONE |
| 16058 | 1456240_x_at | Region | Cdca4            | 71963  | 12   | 108296070 | 108305225 | -    |
| 16059 | 1458979_at   | Region | None             | None   | 7    | 57533643  | 57534253  | +    |
| 16060 | 1452949_at   | Region | Polr3b           | 70428  | 10   | 84517097  | 84621838  | +    |
| 16061 | 1435613_x_at | Region | Cox5b            | 12859  | 1    | 36986129  | 36987976  | +    |
| 16062 | 1454882_at   | Region | L3mbtl3          | 237339 | 10   | 26275100  | 26374931  | -    |
| 16063 | 1444007_at   | Region | A830082K12Rik    | 320174 | 13   | 74299710  | 74300170  | +    |
| 16064 | 1428452_at   | Region | 2810025M15Rik    | 69953  | 1    | 157317920 | 157325803 | +    |
| 16065 | 1459014_at   | Region | 2900019G14Rik    | 72932  | 2    | 102490690 | 102491215 | -    |
| 16066 | 1418763_at   | Region | Nit2             | 52633  | 16   | 56061530  | 56071962  | -    |
| 16067 | 1419357_at   | Region | 5830446M03Rik    | 57905  | 6    | 88255108  | 88275421  | -    |
| 16068 | 1452316_at   | Region | Phf22            | 71793  | 3    | 131982349 | 132001384 | +    |
| 16069 | 1428831_at   | Region | 6230429P13Rik    | 76134  | 16   | 30769041  | 30771424  | -    |
| 16070 | 1438015_at   | Region | BC068171         | 245474 | X    | 69756509  | 69770234  | +    |
| 16071 | 1439177_at   | Region | None             | None   | 11   | 97522883  | 97523511  | +    |
| 16072 | 1426990_at   | Region | Cubn             | 65969  | 2    | 13192347  | 13407933  | -    |
| 16073 | 1436750_a_at | Region | Oxct1            | 67041  | 15   | 3809284   | 3936636   | +    |

|       |              |        |               |        |      |           |           |      |
|-------|--------------|--------|---------------|--------|------|-----------|-----------|------|
| 16074 | 1430546_at   | Region | Cryz1         | 66609  | 16   | 90846621  | 90885763  | -    |
| 16075 | 1421225_a_at | Region | Slc4a4        | 54403  | 5    | 88232301  | 88532904  | +    |
| 16076 | 1418022_at   | Region | Narg1         | 74838  | 3    | 51048093  | 51105995  | +    |
| 16077 | 1423272_at   | Region | Polg          | 18975  | 7    | 73245122  | 73263390  | -    |
| 16078 | 1422842_at   | Region | Xrn2          | 24128  | 2    | 146470058 | 146532016 | +    |
| 16079 | 1434511_at   | Region | Phkb          | 102093 | 8    | 85113615  | 85333255  | +    |
| 16080 | 1423651_at   | Region | Hbld2         | 69046  | 13   | 58415013  | 58429387  | -    |
| 16081 | 1436898_at   | Region | None          | None   | 4    | 126053961 | 126055205 | +    |
| 16082 | 1416024_x_at | Region | Cct3          | 12462  | 3    | 88040999  | 88065630  | +    |
| 16083 | 1433010_at   | Region | 5530400N10Rik | 71420  | 15   | 55694375  | 55695934  | -    |
| 16084 | 1439189_at   | Region | D630023B12Rik | 329679 | 3    | 79184389  | 79228661  | -    |
| 16085 | 1418278_at   | Region | Apoc3         | 11814  | 9    | 46246303  | 46248549  | -    |
| 16086 | 1423894_a_at | Region | Dalrd3        | 67789  | 9    | 108618891 | 108621769 | +    |
| 16087 | 1423566_a_at | Region | Hsp105        | 15505  | 5    | 148555092 | 148574465 | -    |
| 16088 | 1428474_at   | Region | Ppp3cb        | 19056  | 14   | 18861352  | 18907856  | -    |
| 16089 | 1426538_a_at | Region | Trp53         | 22059  | 11   | 69305639  | 69317529  | +    |
| 16090 | 1455341_at   | Region | 2010003J03Rik | 69860  | 19   | 5155603   | 5160301   | +    |
| 16091 | 1431415_a_at | Region | Tbpl1         | 237336 | 10   | 22693541  | 22721040  | -    |
| 16092 | 1430649_at   | Region | Baal          | 118452 | 15   | 38833124  | 38850257  | +    |
| 16093 | 1450919_at   | Region | Mpp1          | 17524  | X    | 69770388  | 69791604  | -    |
| 16094 | 1433869_at   | Region | Zxdc          | 80292  | 6    | 90805539  | 90839567  | +    |
| 16095 | 1435173_at   | Region | Ate1          | 11907  | 7    | 124514765 | 124642811 | -    |
| 16096 | 1449766_at   | Region | Syt6          | 54524  | 3    | 103002769 | 103058318 | +    |
| 16097 | 1436768_x_at | Region | E130112L23Rik | 268739 | 14   | 47085678  | 47106098  | +    |
| 16098 | 1418402_at   | Region | Adam19        | 11492  | 11   | 45808889  | 45900180  | +    |
| 16099 | 1427967_at   | Region | Srgap2        | 14270  | 1    | 131135970 | 131377678 | -    |
| 16100 | 1437256_at   | Region | 4833420K19Rik | 76863  | 9    | 7176782   | 7200101   | +    |
| 16101 | 1440291_at   | Region | Insm1         | 53626  | 2    | 145679042 | 145681349 | +    |
| 16102 | 1438835_a_at | Region | MGI:1336880   | 20624  | 11   | 102659566 | 102702006 | -    |
| 16103 | 1431772_a_at | Region | Sh3d1B        | 20403  | 12   | 3775688   | 3876446   | +    |
| 16104 | 1425505_at   | Region | Mylk          | 107589 | 16   | 33677883  | 33783686  | +    |
| 16105 | 1415934_at   | Region | Cops8         | 108679 | 1    | 90422604  | 90432727  | +    |
| 16106 | 1423708_a_at | Region | Farslb        | 23874  | 1    | 78713481  | 78777515  | -    |
| 16107 | 1453762_at   | Region | 2310075A12Rik | 69091  | 9    | 26901688  | 26924026  | -    |
| 16108 | 1438067_at   | Region | Nf1           | 18015  | 11   | 79065551  | 79307268  | +    |
| 16109 | 1419189_at   | Region | Vti1a         | 53611  | 19   | 54896591  | 55207543  | +    |
| 16110 | 1422082_a_at | Region | Nfya          | 18044  | 17   | 45916830  | 45939727  | -    |
| 16111 | 1437483_at   | Region | Zfp513        | 101023 | 5    | 29657919  | 29661171  | -    |
| 16112 | 1449027_at   | Region | Rhou          | 69581  | 8    | 122941001 | 122950952 | +    |
| 16113 | 1429081_at   | Region | 2600014C01Rik | 70297  | 10   | 58247922  | 58263193  | +    |
| 16114 | 1419288_at   | Region | Jam2          | 67374  | 16   | 83882574  | 83932843  | +    |
| 16115 | 1456453_at   | Region | Evl           | 14026  | 12   | 104025433 | 104159229 | +    |
| 16116 | 1447061_at   | Region | None          | None   | 7    | 13984958  | 13985225  | -    |
| 16117 | 1430318_at   | Region | Sat2          | 69215  | 11   | 69347699  | 69349528  | +    |
| 16118 | 1428708_x_at | Region | 2610009E16Rik | 69202  | 6    | 125570449 | 125574707 | -    |
| 16119 | 1422697_s_at | Region | None          | None   | 13   | 44305979  | 44495797  | +    |
| 16120 | 1435765_at   | Region | E130114P18Rik | 319865 | 4    | 96543212  | 96753121  | -    |
| 16121 | 1440224_at   | Region | 9330133O14Rik | 319574 | 8    | 121825243 | 121827234 | +    |
| 16122 | 1417155_at   | Region | Nmyc1         | 18109  | 12   | 12294434  | 12300049  | -    |
| 16123 | 1428264_at   | Region | Wdr57         | 66585  | NONE | NONE      | NONE      | NONE |
| 16124 | 1426856_at   | Region | Hsdl2         | 72479  | 4    | 59525139  | 59561516  | +    |
|       |              |        | Dir2 ///      |        |      |           |           |      |
| 16125 | 1454654_at   | Region | LOC547255     | 224132 | 16   | 34476226  | 34550765  | -    |
| 16126 | 1454250_at   | Region | Sec15l2       | 75914  | 6    | 84969806  | 85419115  | -    |
| 16127 | 1447241_at   | Region | H2afy3        | 404634 | 10   | 61704953  | 61750170  | -    |
| 16128 | 1438487_s_at | Region | Zzz3          | 108946 | 3    | 151378383 | 151441249 | +    |
| 16129 | 1419376_at   | Region | 1110018M03Rik | 67606  | 2    | 109984712 | 109986780 | -    |
| 16130 | 1444677_at   | Region | C77673        | 97696  | 11   | 94135186  | 94135967  | -    |
| 16131 | 1442532_at   | Region | None          | None   | 19   | 27252273  | 27252945  | +    |
| 16132 | 1460571_at   | Region | Dicer1        | 192119 | 12   | 100135572 | 100196088 | -    |
| 16133 | 1429663_at   | Region | 3110023G01Rik | 71206  | 18   | 77114915  | 77169011  | -    |
| 16134 | 1435861_at   | Region | Ppfia1        | 233977 | 7    | 138888626 | 138965593 | -    |
| 16135 | 1438422_at   | Region | Lrrc20        | 216011 | 10   | 61441266  | 61548546  | +    |
| 16136 | 1448174_at   | Region | Cul1          | 26965  | 6    | 47656010  | 47727829  | +    |
| 16137 | 1421835_at   | Region | Mtap7         | 17761  | 10   | 20157697  | 20207739  | +    |

|       |              |        |               |        |      |           |           |      |
|-------|--------------|--------|---------------|--------|------|-----------|-----------|------|
| 16138 | 1460556_at   | Region | D15Mit260     | 27008  | 15   | 79178305  | 79188187  | +    |
| 16139 | 1424602_s_at | Region | Xrcc4         | 108138 | 13   | 85965021  | 86189500  | -    |
| 16140 | 1457924_at   | Region | Mbnl1         | 56758  | 3    | 60179725  | 60308221  | +    |
| 16141 | 1416226_at   | Region | Arpc1b        | 11867  | 5    | 144160088 | 144166617 | +    |
| 16142 | 1455058_at   | Region | Mtmr9         | 210376 | 14   | 58054197  | 58074540  | -    |
| 16143 | 1459249_at   | Region | Tdrd3         | 219249 | 14   | 81829185  | 81957574  | +    |
| 16144 | 1420093_s_at | Region | Hnrpd1        | 50926  | 5    | 99053360  | 99057516  | -    |
| 16145 | 1448286_at   | Region | Hadh2         | 15108  | X    | 145536292 | 145538834 | +    |
| 16146 | 1429546_at   | Region | Ecgf1         | 72962  | 15   | 89424804  | 89429909  | -    |
| 16147 | 1423574_s_at | Region | Srd5a2l       | 57357  | 5    | 75385516  | 75400710  | +    |
| 16148 | 1417164_at   | Region | Dusp10        | 63953  | 1    | 183531691 | 183573242 | +    |
| 16149 | 1438717_a_at | Region | Osbp16        | 99031  | 2    | 76246089  | 76293794  | +    |
| 16150 | 1427732_s_at | Region | Abcg4         | 192663 | 9    | 44262045  | 44277099  | -    |
| 16151 | 1431598_a_at | Region | Lhx9          | 16876  | 1    | 138672251 | 138686188 | -    |
| 16152 | 1448838_at   | Region | Topors        | 106021 | 4    | 40394151  | 40408676  | -    |
| 16153 | 1450622_at   | Region | Bcar1         | 12927  | 8    | 111008063 | 111041398 | -    |
| 16154 | 1445361_at   | Region | Ankrd12       | 67107  | 12   | 101       | 1172      | +    |
| 16155 | 1419366_at   | Region | Zmat5         | 67178  | 11   | 4599465   | 4632453   | +    |
| 16156 | 1438556_a_at | Region | Tmod3         | 50875  | 9    | 75635361  | 75697149  | -    |
| 16157 | 1448159_at   | Region | Rab7          | 19349  | 6    | 88435785  | 88481888  | -    |
| 16158 | 1441992_at   | Region | Rab14         | 68365  | 2    | 35113675  | 35132954  | -    |
| 16159 | 1422561_at   | Region | Adamts5       | 23794  | 16   | 84962621  | 85000488  | -    |
| 16160 | 1442350_at   | Region | None          | None   | 13   | 111247362 | 111248669 | -    |
| 16161 | 1442901_at   | Region | Tax1bp1       | 52440  | 6    | 52858073  | 52910809  | +    |
| 16162 | 1439311_at   | Region | B830012L14Rik | 320085 | 12   | 105178883 | 105179473 | +    |
| 16163 | 1450471_at   | Region | Smad3         | 17127  | 9    | 63767269  | 63878762  | -    |
| 16164 | 1424440_at   | Region | Mrps6         | 121022 | 16   | 91215580  | 91269471  | +    |
| 16165 | 1421216_a_at | Region | Ids           | 15931  | X    | 65014764  | 65033475  | -    |
| 16166 | 1453771_at   | Region | Gulp1         | 70676  | 1    | 44850896  | 45102275  | +    |
| 16167 | 1455585_at   | Region | Rnf168        | 70238  | 16   | 31086860  | 31110277  | +    |
| 16168 | 1423475_at   | Region | Cnm2          | 94219  | 19   | 46312725  | 46429008  | +    |
| 16169 | 1450650_at   | Region | Myo10         | 17909  | 15   | 25611655  | 25800954  | +    |
| 16170 | 1428321_at   | Region | Eml1          | 68519  | 12   | 103881621 | 104010277 | +    |
| 16171 | 1440331_at   | Region | 9430079B08Rik | 320481 | 1    | 106664272 | 106664657 | -    |
| 16172 | 1422688_a_at | Region | Nras          | 18176  | 3    | 102486135 | 102496241 | +    |
| 16173 | 1457881_at   | Region | Osbp16        | 99031  | 2    | 76246089  | 76293794  | +    |
| 16174 | 1436306_at   | Region | B430201G11Rik | 243819 | 7    | 3876696   | 3903491   | -    |
| 16175 | 1417075_at   | Region | 2010309E21Rik | 66488  | 6    | 4013569   | 4015176   | +    |
| 16176 | 1433872_at   | Region | 2410042D21Rik | 72425  | 2    | 112002449 | 112037475 | +    |
| 16177 | 1436522_at   | Region | 0610025L06Rik | 67803  | 11   | 105977345 | 105981231 | -    |
| 16178 | 1429402_at   | Region | Glt8d2        | 74782  | 10   | 82538402  | 82578619  | -    |
| 16179 | 1455252_at   | Region | Tsc1          | 64930  | 2    | 28573403  | 28619515  | +    |
| 16180 | 1433749_at   | Region | Gna13         | 14674  | 11   | 109184029 | 109219306 | +    |
| 16181 | 1424950_at   | Region | Sox9          | 20682  | 11   | 112603317 | 112608842 | +    |
| 16182 | 1423750_a_at | Region | Zfp162        | 22668  | 19   | 6152878   | 6165003   | +    |
| 16183 | 1424712_at   | Region | Ahctf1        | 226747 | 1    | 179700337 | 179757911 | -    |
| 16184 | 1419924_at   | Region | None          | None   | 11   | 54270443  | 54271077  | -    |
| 16185 | 1451124_at   | Region | Sod1          | 20655  | 16   | 89378174  | 89383756  | +    |
| 16186 | 1430062_at   | Region | 1600002O04Rik | 214305 | 12   | 103777190 | 103800577 | +    |
| 16187 | 1457529_x_at | Region | 2810021G02Rik | 353208 | NONE | NONE      | NONE      | NONE |
| 16188 | 1441075_at   | Region | LOC329416     | 329416 | 2    | 68991247  | 69044726  | +    |
| 16189 | 1431646_a_at | Region | Stx6          | 58244  | 1    | 155049479 | 155094254 | +    |
| 16190 | 1458539_at   | Region | R3hdm         | 226412 | 1    | 127946018 | 128080726 | +    |
| 16191 | 1425410_at   | Region | 1810034M08Rik | 69786  | 6    | 86345388  | 86360039  | +    |
| 16192 | 1451658_a_at | Region | Polr3c        | 74414  | 3    | 96199326  | 96215464  | -    |
| 16193 | 1437001_at   | Region | Gsk3b         | 56637  | 16   | 36906890  | 37063968  | +    |
| 16194 | 1416660_at   | Region | Eif3s10       | 13669  | 19   | 60361493  | 60391011  | -    |
| 16195 | 1437617_x_at | Region | 1110034G24Rik | 73747  | 2    | 132192859 | 132264907 | +    |
| 16196 | 1450295_s_at | Region | Pvr           | 52118  | 7    | 633       | 12546     | -    |
| 16197 | 1420091_s_at | Region | Morc3         | 338467 | 16   | 93003378  | 93047429  | +    |
| 16198 | 1439478_at   | Region | MGI:2159605   | 171210 | 12   | 80852219  | 80858208  | +    |
| 16199 | 1425061_at   | Region | Wasf3         | 245880 | 5    | 145270584 | 145355994 | +    |
| 16200 | 1425820_x_at | Region | Gpatc4        | 66614  | 3    | 87786988  | 87799852  | +    |
| 16201 | 1448190_at   | Region | Mrpl33        | 66845  | 5    | 30072910  | 30081579  | +    |
| 16202 | 1456517_at   | Region | Tmem44        | 224090 | 16   | 29326754  | 29359563  | -    |



|       |              |        |               |        |      |           |           |      |
|-------|--------------|--------|---------------|--------|------|-----------|-----------|------|
| 16203 | 1437995_x_at | Region | 38602         | 235072 | 9    | 25147069  | 25202879  | +    |
| 16204 | 1431430_s_at | Region | Trim59        | 66949  | 3    | 68705814  | 68715182  | -    |
| 16205 | 1428753_a_at | Region | Dgcr6         | 13353  | 16   | 16823817  | 16842299  | +    |
| 16206 | 1436570_at   | Region | None          | None   | 3    | 9684305   | 9685669   | -    |
| 16207 | 1440913_at   | Region | BC037704      | 269087 | 19   | 43219589  | 43220659  | +    |
| 16208 | 1436010_at   | Region | BC036313      | 268747 | 14   | 50024964  | 50025797  | +    |
| 16209 | 1416340_a_at | Region | Man2b1        | 17159  | 8    | 84354016  | 84368320  | +    |
| 16210 | 1448617_at   | Region | Cd53          | 12508  | 3    | 106555761 | 106585879 | -    |
| 16211 | 1437470_at   | Region | Pknox1        | 18771  | 17   | 29391575  | 29415568  | +    |
| 16212 | 1454286_at   | Region | 1110004M10Rik | 68464  | NONE | NONE      | NONE      | NONE |
| 16213 | 1439319_at   | Region | Elf1          | 13709  | 14   | 73835241  | 73936523  | +    |
| 16214 | 1433626_at   | Region | Plscr4        | 235527 | 9    | 92348147  | 92383290  | +    |
| 16215 | 1445864_at   | Region | 1500032D16Rik | 78330  | 17   | 29329211  | 29340379  | +    |
| 16216 | 1422136_at   | Region | Uhmk1         | 16589  | 1    | 170133433 | 170149570 | -    |
| 16217 | 1426475_at   | Region | Hmbs          | 15288  | 9    | 44325203  | 44333042  | -    |
| 16218 | 1437456_x_at | Region | Ythdf1        | 228994 | 2    | 180621335 | 180637894 | -    |
| 16219 | 1425825_at   | Region | C230094A16Rik | 237711 | 11   | 29638924  | 29659023  | -    |
| 16220 | 1439678_at   | Region | None          | None   | 1    | 52527483  | 52528166  | -    |
| 16221 | 1418999_at   | Region | 2310033P09Rik | 67862  | 11   | 58933990  | 58936365  | +    |
| 16222 | 1456052_at   | Region | Cdkl3         | 213084 | 11   | 51757190  | 51780399  | +    |
| 16223 | 1423709_s_at | Region | Farslb        | 23874  | 1    | 78713481  | 78777515  | -    |
| 16224 | 1460253_at   | Region | Cklfsf7       | 102545 | 9    | 114730469 | 114755551 | -    |
|       |              |        | Map3k4 ///    |        |      |           |           |      |
| 16225 | 1447667_x_at | Region | LOC433718     | 26407  | 17   | 10867071  | 10957848  | -    |
| 16226 | 1428488_at   | Region | Pigk          | 329777 | 3    | 151707256 | 151782191 | +    |
| 16227 | 1452591_a_at | Region | 2410018G20Rik | 72083  | 16   | 14616558  | 14631439  | -    |
| 16228 | 1457246_at   | Region | Rai16         | 239170 | 14   | 64899284  | 64918304  | -    |
| 16229 | 1441112_at   | Region | 5730454B08Rik | 70579  | 1    | 133482838 | 133516350 | -    |
| 16230 | 1443049_at   | Region | Tmem19        | 67226  | 10   | 115027802 | 115049241 | -    |
| 16231 | 1426722_at   | Region | Slc38a2       | 67760  | 15   | 96755014  | 96767320  | -    |
| 16232 | 1423117_at   | Region | Pum1          | 80912  | 4    | 129460274 | 129578157 | +    |
| 16233 | 1416610_a_at | Region | Clcn3         | 12725  | 8    | 59960629  | 60030782  | -    |
| 16234 | 1454978_at   | Region | Ttyh3         | 78339  | 5    | 139619472 | 139647856 | -    |
| 16235 | 1445830_at   | Region | None          | None   | 2    | 84309625  | 84310487  | -    |
| 16236 | 1424932_at   | Region | Egfr          | 13649  | 11   | 16646996  | 16808700  | +    |
| 16237 | 1436445_at   | Region | Gm996         | 381353 | 2    | 25507592  | 25512261  | -    |
| 16238 | 1421270_at   | Region | Sh3md2        | 59009  | 8    | 60271818  | 60461252  | +    |
| 16239 | 1451252_at   | Region | Irf2bp1       | 272359 | 7    | 15872826  | 15875524  | +    |
| 16240 | 1423676_at   | Region | Atp5h         | 71679  | 11   | 115236790 | 115241012 | -    |
| 16241 | 1447408_at   | Region | None          | None   | 15   | 8211365   | 8211786   | -    |
| 16242 | 1419316_s_at | Region | Gnb1l         | 13972  | 16   | 17269870  | 17335574  | +    |
| 16243 | 1455220_at   | Region | Frat2         | 212398 | 19   | 41390350  | 41392504  | -    |
| 16244 | 1458314_at   | Region | None          | None   | 2    | 102483962 | 102484232 | -    |
| 16245 | 1457345_at   | Region | Polr3b        | 70428  | 10   | 84517097  | 84621838  | +    |
| 16246 | 1456350_at   | Region | Zfp451        | 98403  | 1    | 34030702  | 34083136  | -    |
| 16247 | 1448941_at   | Region | B4galt2       | 53418  | 4    | 116828165 | 116842060 | -    |
| 16248 | 1437619_x_at | Region | Ddr1          | 12305  | 17   | 33397888  | 33421229  | -    |
| 16249 | 1428190_at   | Region | Slc25a1       | 13358  | 16   | 16696186  | 16699355  | -    |
| 16250 | 1448202_x_at | Region | 2610524G07Rik | 66494  | 13   | 53930924  | 53934141  | +    |
| 16251 | 1429214_at   | Region | Adamtsl2      | 77794  | 2    | 27011543  | 27040775  | +    |
| 16252 | 1457316_at   | Region | Mtap6         | 17760  | 7    | 93358278  | 93425764  | +    |
| 16253 | 1415721_a_at | Region | 1200013P24Rik | 74763  | 16   | 3556247   | 3576330   | +    |
| 16254 | 1441191_at   | Region | 2810454H06Rik | 72813  | 6    | 135657588 | 135658254 | +    |
| 16255 | 1441274_at   | Region | Casc3         | 192160 | 11   | 98625992  | 98654894  | +    |
| 16256 | 1439970_at   | Region | Prkwnk1       | 232341 | 6    | 120356763 | 120470204 | -    |
| 16257 | 1446127_at   | Region | Zfhx1a        | 21417  | 18   | 5709786   | 5817483   | +    |
| 16258 | 1419243_at   | Region | Rab1          | 68365  | 2    | 35113675  | 35132954  | -    |
| 16259 | 1460717_at   | Region | Tspyl1        | 22110  | 10   | 34343170  | 34345813  | +    |
| 16260 | 1452745_at   | Region | 1810044A24Rik | 76510  | 15   | 72616617  | 73082807  | -    |
| 16261 | 1444439_at   | Region | Bri3bp        | 76809  | 5    | 124608455 | 124621964 | +    |
| 16262 | 1416279_at   | Region | Ap1b1         | 11764  | 11   | 4881756   | 4937518   | +    |
| 16263 | 1448222_x_at | Region | Cox8a         | 12868  | 19   | 6929007   | 6931380   | -    |
| 16264 | 1434412_x_at | Region | Stub1         | 56424  | 17   | 23636797  | 23639522  | -    |
| 16265 | 1448986_x_at | Region | Dnase2a       | 13423  | 8    | 84176120  | 84182800  | +    |
| 16266 | 1454350_at   | Region | Pdzk6         | 380614 | 3    | 40073399  | 40124437  | +    |

|       |              |        |                   |        |      |           |           |      |
|-------|--------------|--------|-------------------|--------|------|-----------|-----------|------|
| 16267 | 1436194_at   | Region | C330008K14Rik     | 77619  | 18   | 42096231  | 42171850  | -    |
| 16268 | 1427276_at   | Region | Smc411            | 70099  | 3    | 68675494  | 68705145  | +    |
| 16269 | 1428814_at   | Region | None              | None   | 17   | 30133243  | 30134192  | +    |
| 16270 | 1416974_at   | Region | Stam2             | 56324  | 2    | 52624368  | 52674311  | -    |
| 16271 | 1416427_at   | Region | Ccni              | 12453  | 5    | 92517687  | 92541778  | -    |
| 16272 | 1460259_s_at | Region | Clca1 /// Clca2   | 12722  | 3    | 143701991 | 143732414 | -    |
| 16273 | 1454642_a_at | Region | Comm3             | 12238  | 2    | 18714472  | 18718226  | +    |
| 16274 | 1440941_at   | Region | LOC552912         | 552912 | 11   | 49874351  | 49875017  | +    |
| 16275 | 1452960_at   | Region | Scyl3             | 240880 | 1    | 163847656 | 163872719 | +    |
| 16276 | 1449431_at   | Region | Trpc6             | 22068  | 9    | 8548619   | 8691692   | +    |
| 16277 | 1440123_at   | Region | None              | None   | X    | 145799131 | 145800126 | +    |
| 16278 | 1443534_at   | Region | None              | None   | 3    | 60191372  | 60191815  | +    |
| 16279 | 1454982_at   | Region | Arfgef2           | 99371  | 2    | 166291195 | 166354676 | +    |
| 16280 | 1448918_at   | Region | Slco3a1           | 108116 | 7    | 68181298  | 68451736  | -    |
| 16281 | 1451997_at   | Region | Zfp426            | 235028 | 9    | 20341367  | 20365016  | -    |
| 16282 | 1421721_a_at | Region | Arnt              | 11863  | 3    | 94936201  | 94983401  | +    |
| 16283 | 1444109_at   | Region | C130009A20Rik     | 399614 | 12   | 47365270  | 47365911  | -    |
| 16284 | 1435409_at   | Region | None              | None   | 10   | 68837300  | 68837958  | +    |
| 16285 | 1416182_at   | Region | Apba3             | 57267  | 10   | 81404370  | 81409313  | +    |
| 16286 | 1418872_at   | Region | Abcb1b            | 18669  | 5    | 8804929   | 8873051   | +    |
| 16287 | 1435101_at   | Region | Derl2             | 116891 | 11   | 70733103  | 70744921  | -    |
| 16288 | 1423386_at   | Region | Psm19             | 67151  | 5    | 122391343 | 122411976 | +    |
| 16289 | 1423598_at   | Region | Atp8a1            | 11980  | 5    | 66388740  | 66614923  | -    |
| 16290 | 1425551_at   | Region | Hip1r             | 29816  | 5    | 123144623 | 123174525 | +    |
| 16291 | 1448178_a_at | Region | Cct3              | 12462  | 3    | 88040999  | 88065630  | +    |
| 16292 | 1452313_at   | Region | 5930416I19Rik     | 72440  | 6    | 129047547 | 129053009 | -    |
| 16293 | 1454611_a_at | Region | Calm1             | 12313  | 12   | 95642228  | 95652493  | +    |
| 16294 | 1436083_at   | Region | LOC435965         | 435965 | 7    | 30363538  | 30367683  | -    |
| 16295 | 1423528_at   | Region | Bcas3             | 192197 | 11   | 85081206  | 85554043  | +    |
| 16296 | 1429980_x_at | Region | 1810073N04Rik     | 72055  | 11   | 119925064 | 119972367 | -    |
| 16297 | 1445267_at   | Region | None              | None   | NONE | NONE      | NONE      | NONE |
| 16298 | 1421809_at   | Region | Dgcr2             | 13356  | 16   | 16612273  | 16662559  | -    |
| 16299 | 1448410_at   | Region | Ube4b             | 63958  | 4    | 147820778 | 147919111 | -    |
| 16300 | 1417212_at   | Region | 9530058B02Rik     | 68241  | 17   | 23669857  | 23674885  | -    |
| 16301 | 1428857_at   | Region | 2610304F09Rik     | 269003 | 18   | 31874527  | 31963205  | +    |
| 16302 | 1418433_at   | Region | Cab39             | 12283  | 1    | 85601719  | 85656721  | +    |
|       |              |        | 5730427N09Rik /// |        |      |           |           |      |
|       |              |        | LOC433230 ///     |        |      |           |           |      |
| 16303 | 1423131_at   | Region | LOC545264         | 433230 | 19   | 21678941  | 21680624  | +    |
| 16304 | 1434973_at   | Region | Car7              | 12354  | 8    | 103833942 | 103843478 | +    |
| 16305 | 1441117_at   | Region | None              | None   | 3    | 88781825  | 88782901  | +    |
| 16306 | 1460391_at   | Region | 2810409H07Rik     | 67059  | 2    | 72790552  | 72912196  | -    |
| 16307 | 1431163_at   | Region | 2700046G09Rik     | 67188  | 19   | 31714681  | 31716657  | +    |
| 16308 | 1449527_at   | Region | Pcdhb7            | 93878  | 18   | 37565424  | 37568924  | +    |
| 16309 | 1434191_at   | Region | A530016O06Rik     | 319660 | 12   | 33844550  | 34007192  | +    |
| 16310 | 1431784_a_at | Region | Bxdc5             | 70285  | 3    | 145482969 | 145497969 | -    |
| 16311 | 1426333_a_at | Region | lkbkb             | 16150  | 8    | 21414342  | 21461142  | -    |
| 16312 | 1427595_at   | Region | Acaca             | 107476 | 11   | 84006901  | 84040802  | +    |
| 16313 | 1451547_at   | Region | 0610009A07Rik     | 70337  | 10   | 6951826   | 6966424   | -    |
| 16314 | 1429595_at   | Region | 2700049A03Rik     | 76967  | 12   | 67971858  | 68080085  | +    |
| 16315 | 1424993_at   | Region | 8430410K20Rik     | 78100  | 9    | 4293956   | 4297903   | +    |
| 16316 | 1449173_at   | Region | Mpp2              | 50997  | 11   | 101878106 | 101909589 | -    |
| 16317 | 1460053_at   | Region | Smyd4             | 319822 | 11   | 75074254  | 75131344  | +    |
| 16318 | 1444298_at   | Region | A130090K04Rik     | 320495 | 10   | 3613859   | 3614698   | +    |
| 16319 | 1455507_s_at | Region | D8Ert587e         | 52335  | 8    | 109024127 | 109027469 | -    |
| 16320 | 1434945_at   | Region | A330042H22        | 270084 | 8    | 92142468  | 92206397  | +    |
| 16321 | 1441969_at   | Region | Trim36            | 28105  | 18   | 46386470  | 46433150  | -    |
| 16322 | 1438147_at   | Region | Srcrb4d           | 109267 | 5    | 134973716 | 134981543 | -    |
| 16323 | 1442153_at   | Region | None              | None   | NONE | NONE      | NONE      | NONE |
| 16324 | 1417203_at   | Region | Eth1              | 66071  | 7    | 19769996  | 19785025  | +    |
| 16325 | 1444317_at   | Region | LOC546479         | 546479 | 10   | 74737456  | 74741374  | +    |
| 16326 | 1456681_at   | Region | AI848149          | 102944 | X    | 149195889 | 149196608 | -    |
| 16327 | 1417559_at   | Region | Sfxn1             | 14057  | 13   | 52636174  | 52672650  | +    |
| 16328 | 1452047_at   | Region | Cacybp            | 12301  | 1    | 160107568 | 160117424 | -    |
| 16329 | 1428357_at   | Region | 2610019F03Rik     | 72148  | 8    | 13330624  | 13353305  | -    |

|       |              |        |               |        |    |           |           |   |
|-------|--------------|--------|---------------|--------|----|-----------|-----------|---|
| 16330 | 1439369_x_at | Region | Slc9a3r2      | 65962  | 17 | 22442873  | 22453949  | - |
| 16331 | 1448563_at   | Region | Phb           | 18673  | 11 | 95488102  | 95501852  | + |
| 16332 | 1431107_at   | Region | Stk35         | 67333  | 2  | 129314605 | 129341840 | + |
| 16333 | 1448279_at   | Region | Arpc3         | 56378  | 5  | 121544278 | 121558528 | + |
| 16334 | 1460402_at   | Region | Brpf1         | 78783  | 6  | 113874964 | 113892542 | + |
| 16335 | 1423533_a_at | Region | Rhot1         | 59040  | 11 | 79934743  | 79993145  | + |
| 16336 | 1421887_a_at | Region | Aplp2         | 11804  | 9  | 31068390  | 31130767  | - |
| 16337 | 1455243_at   | Region | Brpf3         | 268936 | 17 | 26602697  | 26638455  | + |
| 16338 | 1422715_s_at | Region | Acp1          | 11431  | 12 | 27469324  | 27487670  | - |
| 16339 | 1435042_at   | Region | 9130004C02Rik | 320594 | 9  | 25145503  | 25146631  | - |
| 16340 | 1434676_at   | Region | Mtmr9         | 210376 | 14 | 58054197  | 58074540  | - |
| 16341 | 1418617_x_at | Region | Clgn          | 12745  | 8  | 82637493  | 82683940  | + |
| 16342 | 1442916_at   | Region | None          | None   | 8  | 67158135  | 67158773  | - |
| 16343 | 1421340_at   | Region | Map3k5        | 26408  | 10 | 19860944  | 20067353  | + |
| 16344 | 1433015_at   | Region | 6330436F06Rik | 76733  | 6  | 21322082  | 21323460  | + |
| 16345 | 1455580_at   | Region | Usp6nl        | 98910  | 2  | 6270005   | 6360769   | + |
| 16346 | 1424293_s_at | Region | 2610319K07Rik | 72519  | 4  | 14791184  | 14842225  | + |
| 16347 | 1451038_at   | Region | Apln          | 30878  | X  | 42545942  | 42555630  | - |
| 16348 | 1418181_at   | Region | Ptp4a3        | 19245  | 15 | 73776930  | 73787284  | + |
| 16349 | 1423346_at   | Region | Degs1         | 13244  | 1  | 182232966 | 182239955 | - |
| 16350 | 1426217_at   | Region | 2810441K11Rik | 68642  | 19 | 9746963   | 9752737   | - |
| 16351 | 1441459_at   | Region | None          | None   | 3  | 44728729  | 44729421  | - |
| 16352 | 1457318_at   | Region | A330008L17Rik | 234624 | 8  | 98707406  | 98715396  | + |
| 16353 | 1445370_at   | Region | None          | None   | 2  | 173246449 | 173247097 | + |
| 16354 | 1418461_at   | Region | Sh3d19        | 27059  | 3  | 85819530  | 85872864  | + |
| 16355 | 1428764_at   | Region | Gtl2          | 17263  | 12 | 105023823 | 105039917 | + |
| 16356 | 1435775_at   | Region | Tparl         | 21982  | 5  | 75429189  | 75454483  | + |
| 16357 | 1459560_at   | Region | 4921517N04Rik | 76857  | 2  | 23449966  | 23450521  | - |
| 16358 | 1430875_a_at | Region | Pak1ip1       | 68083  | 13 | 40561850  | 40573601  | + |
| 16359 | 1455563_at   | Region | LOC234374     | 234374 | 8  | 69446573  | 69455569  | - |
| 16360 | 1440349_at   | Region | Dmtf1         | 23857  | 5  | 9125544   | 9168200   | - |
| 16361 | 1431820_at   | Region | 4632404H12Rik | 74034  | 3  | 89573694  | 89579423  | - |
| 16362 | 1418960_at   | Region | Phf201        | 239510 | 15 | 66601624  | 66648123  | + |
| 16363 | 1418369_at   | Region | Prim1         | 19075  | 10 | 127751925 | 127766740 | + |
| 16364 | 1425314_at   | Region | Mass1         | 110789 | 13 | 77171389  | 77706926  | - |
| 16365 | 1444661_at   | Region | Gpr26         | 233919 | 7  | 126330320 | 126349493 | + |
| 16366 | 1429724_at   | Region | Prpf4         | 70052  | 4  | 61500023  | 61515662  | + |
| 16367 | 1455568_at   | Region | 2310015A05Rik | 72315  | 16 | 16417438  | 16421706  | + |
| 16368 | 1415767_at   | Region | Ythdf1        | 228994 | 2  | 180621335 | 180637894 | - |
| 16369 | 1430392_at   | Region | 9530086O07Rik | 78741  | 6  | 101791069 | 101792336 | - |
| 16370 | 1446957_s_at | Region | BC004022      | 80750  | 8  | 86127817  | 86128370  | - |
| 16371 | 1425358_at   | Region | Riok1         | 71340  | 13 | 37576092  | 37600226  | + |
| 16372 | 1434079_s_at | Region | Mcm2          | 17216  | 6  | 89318530  | 89333755  | - |
| 16373 | 1443860_at   | Region | Ptprd         | 19266  | 4  | 75201576  | 75510952  | - |
| 16374 | 1445885_at   | Region | Ube2d2        | 56550  | 18 | 35995272  | 36030828  | + |
| 16375 | 1418373_at   | Region | Pgam2         | 56012  | 11 | 5696431   | 5698520   | - |
| 16376 | 1419662_at   | Region | Ogn           | 18295  | 13 | 49204931  | 49221360  | + |
| 16377 | 1456189_x_at | Region | Ltbp3         | 16998  | 19 | 5530917   | 5547315   | + |
| 16378 | 1455533_at   | Region | A930025D01Rik | 319513 | 2  | 129932077 | 129938125 | - |
| 16379 | 1424144_at   | Region | Ris2          | 67177  | 8  | 121949602 | 121954717 | + |
| 16380 | 1445375_at   | Region | Sh3d1B        | 20403  | 12 | 3775688   | 3876446   | + |
| 16381 | 1429144_at   | Region | 2310032D16Rik | 74182  | 2  | 132043251 | 132092031 | - |
| 16382 | 1447024_at   | Region | BC055915      | 211660 | 1  | 10178667  | 10241764  | + |
| 16383 | 1428725_at   | Region | Miz1          | 17344  | 18 | 77186923  | 77275518  | + |
| 16384 | 1434063_at   | Region | AW060232      | 269704 | 5  | 124022903 | 124049431 | + |
| 16385 | 1444687_at   | Region | C1ql2         | 226359 | 1  | 120098991 | 120101583 | + |
| 16386 | 1434004_at   | Region | Dhps          | 330817 | 8  | 84342639  | 84345999  | + |
| 16387 | 1432582_at   | Region | 3110054G05Rik | 73239  | 6  | 38668788  | 38670089  | - |
| 16388 | 1417026_at   | Region | Pfdn1         | 67199  | 18 | 36627481  | 36678297  | - |
| 16389 | 1441213_at   | Region | BC021891      | 234878 | 8  | 125197983 | 125232857 | + |
| 16390 | 1433535_x_at | Region | Cct2          | 12461  | 10 | 116740451 | 116753217 | - |
| 16391 | 1418795_at   | Region | Cds2          | 110911 | 2  | 131777151 | 131821546 | + |
| 16392 | 1423633_at   | Region | 6530403A03Rik | 67797  | 13 | 37743845  | 37765948  | + |
| 16393 | 1454231_a_at | Region | Rpgrip1       | 77945  | 14 | 47211021  | 47261035  | + |
| 16394 | 1448547_at   | Region | Rassf3        | 192678 | 10 | 121066604 | 121132504 | - |







|       |              |        |               |        |      |           |           |      |
|-------|--------------|--------|---------------|--------|------|-----------|-----------|------|
| 16589 | 1417591_at   | Region | Ptges2        | 96979  | 2    | 32328420  | 32334901  | +    |
| 16590 | 1436858_at   | Region | Mbnl2         | 105559 | 14   | 114846670 | 115003029 | +    |
| 16591 | 1438225_x_at | Region | Tram1         | 72265  | 1    | 13697903  | 13722901  | -    |
| 16592 | 1458506_at   | Region | Gm1582        | 380890 | 14   | 31703552  | 31707587  | +    |
| 16593 | 1442695_at   | Region | C030007I01Rik | 77333  | 5    | 130019276 | 130019862 | +    |
| 16594 | 1431753_x_at | Region | 2900073H19Rik | 68205  | 2    | 29759551  | 29777158  | +    |
| 16595 | 1451521_x_at | Region | Wbscr1        | 22384  | 5    | 350218    | 369670    | -    |
| 16596 | 1448645_at   | Region | Msl31         | 17692  | X    | 162253522 | 162273307 | -    |
| 16597 | 1422245_a_at | Region | Mrvi1         | 17540  | 7    | 104721209 | 104835598 | -    |
| 16598 | 1426017_a_at | Region | 0610011L14Rik | 68295  | 2    | 156004536 | 156025909 | +    |
| 16599 | 1423568_at   | Region | Psma7         | 26444  | 2    | 179753334 | 179759360 | -    |
| 16600 | 1428139_at   | Region | 4930538D17Rik | 75146  | 19   | 45904277  | 45922593  | +    |
| 16601 | 1421122_at   | Region | Cbll1         | 104836 | 12   | 28062305  | 28074949  | -    |
| 16602 | 1448271_a_at | Region | Ddx21         | 56200  | 10   | 62546632  | 62565575  | -    |
| 16603 | 1424734_at   | Region | Rasgrf1       | 19417  | 9    | 89795814  | 89912965  | +    |
| 16604 | 1418279_a_at | Region | Akap1         | 11640  | 11   | 88652757  | 88672590  | -    |
| 16605 | 1423762_at   | Region | Adck1         | 72113  | 12   | 4589      | 10832     | -    |
| 16606 | 1434473_at   | Region | Slc16a5       | 217316 | 11   | 115285663 | 115294699 | +    |
| 16607 | 1444510_at   | Region | None          | None   | 2    | 180611591 | 180612082 | +    |
| 16608 | 1429876_at   | Region | Supt7l        | 72195  | 5    | 29973507  | 29985623  | -    |
| 16609 | 1426528_at   | Region | Nrp2          | 18187  | 1    | 62996720  | 63108906  | +    |
| 16610 | 1459874_s_at | Region | Mtmr4         | 170749 | 11   | 87320209  | 87344288  | +    |
| 16611 | 1415756_a_at | Region | Snapap        | 20615  | 3    | 90298452  | 90301491  | -    |
| 16612 | 1419828_at   | Region | Usp31         | 76179  | 7    | 115517588 | 115530585 | -    |
| 16613 | 1449349_at   | Region | Nudt1         | 17766  | 5    | 139328262 | 139334475 | +    |
| 16614 | 1418836_at   | Region | Qprt          | 67375  | 7    | 121157501 | 121171760 | -    |
| 16615 | 1443986_at   | Region | Hrpt2         | 214498 | 1    | 143439562 | 143534747 | -    |
| 16616 | 1436848_x_at | Region | Impa1         | 55980  | 3    | 10315087  | 10332919  | -    |
| 16617 | 1424675_at   | Region | Slc39a6       | 106957 | 18   | 24808377  | 24830068  | -    |
| 16618 | 1445273_at   | Region | D10ErtD638e   | 52658  | 10   | 67136475  | 67136802  | +    |
| 16619 | 1426498_at   | Region | Jarid1c       | 20591  | X    | 145767667 | 145808191 | +    |
| 16620 | 1444912_at   | Region | None          | None   | 12   | 28493291  | 28494096  | +    |
| 16621 | 1420098_s_at | Region | D13ErtD787e   | 52680  | 13   | 44331485  | 44331921  | +    |
| 16622 | 1438293_at   | Region | A930031F18Rik | 77832  | 5    | 113817500 | 113831953 | +    |
| 16623 | 1429193_at   | Region | Ankib1        | 70797  | 5    | 3696004   | 3698199   | -    |
| 16624 | 1434183_at   | Region | LOC546078     | 546078 | 8    | 83257670  | 83259649  | +    |
| 16625 | 1455801_x_at | Region | Tbcd          | 108903 | 11   | 121273095 | 121438261 | +    |
| 16626 | 1434043_a_at | Region | None          | None   | 6    | 48731274  | 48731962  | +    |
| 16627 | 1456417_at   | Region | Zic4          | 22774  | 9    | 91269057  | 91275258  | +    |
| 16628 | 1448706_at   | Region | Ttrap         | 56196  | 13   | 24311562  | 24322023  | +    |
| 16629 | 1438883_at   | Region | Fgf5          | 14176  | 5    | 97273813  | 97296659  | +    |
| 16630 | 1454756_at   | Region | None          | None   | 16   | 31820778  | 31823841  | +    |
| 16631 | 1456284_at   | Region | None          | None   | 13   | 94874779  | 94880829  | -    |
| 16632 | 1425331_at   | Region | Zfp106        | 20402  | 2    | 120023462 | 120077639 | -    |
| 16633 | 1449047_at   | Region | 1600020H07Rik | 56794  | 14   | 29739097  | 29772832  | -    |
| 16634 | 1434607_at   | Region | Ddx52         | 78394  | 11   | 83670170  | 83690182  | +    |
| 16635 | 1433905_at   | Region | Akap7         | 268287 | 10   | 25144311  | 25145838  | -    |
| 16636 | 1433105_at   | Region | 5830438M01Rik | 76032  | 16   | 31112565  | 31113866  | -    |
| 16637 | 1424426_at   | Region | Mtap          | 66902  | 4    | 88123618  | 88167275  | +    |
| 16638 | 1440431_at   | Region | Meis1         | 17268  | 11   | 18775221  | 18913473  | -    |
| 16639 | 1437690_x_at | Region | Csnk1d        | 104318 | 11   | 120784515 | 120812412 | -    |
| 16640 | 1421731_a_at | Region | Fen1          | 14156  | 19   | 9395636   | 9400440   | -    |
| 16641 | 1457695_at   | Region | Ap1gbbp1      | 217030 | 11   | 83692463  | 83770081  | +    |
| 16642 | 1449261_at   | Region | Pbx2          | 18515  | 17   | 32293780  | 32299792  | +    |
| 16643 | 1437766_at   | Region | None          | None   | NONE | NONE      | NONE      | NONE |
| 16644 | 1450223_at   | Region | Apaf1         | 11783  | 10   | 90961928  | 91054028  | -    |
| 16645 | 1440537_at   | Region | Kcnv2         | 240595 | 19   | 26562685  | 26577245  | +    |
| 16646 | 1417138_s_at | Region | Polr2e        | 66420  | 10   | 80158583  | 80162429  | -    |
| 16647 | 1455441_at   | Region | Map3k7        | 26409  | 4    | 32242911  | 32299581  | +    |
| 16648 | 1446987_at   | Region | 3110037I16Rik | 73172  | 4    | 119943646 | 119947449 | -    |
| 16649 | 1419303_at   | Region | Heyl          | 56198  | 4    | 122260965 | 122276982 | +    |
| 16650 | 1450995_at   | Region | Folr1         | 14275  | 7    | 95964436  | 95976787  | -    |
| 16651 | 1454709_at   | Region | 9630015D15Rik | 100201 | 4    | 15192785  | 15212331  | +    |
| 16652 | 1434312_at   | Region | AI788669      | 104877 | 12   | 66207139  | 66207778  | +    |
| 16653 | 1433663_s_at | Region | LOC433702     | 433702 | 4    | 46054469  | 46088325  | +    |





|       |              |        |               |        |      |           |           |      |
|-------|--------------|--------|---------------|--------|------|-----------|-----------|------|
| 16719 | 1453456_at   | Region | 2900084O13Rik | 73080  | 17   | 88742782  | 88743492  | -    |
| 16720 | 1442849_at   | Region | Lrp1          | 16971  | 10   | 127274824 | 127357767 | -    |
| 16721 | 1434732_x_at | Region | Tomm7         | 66169  | 5    | 22303551  | 22308004  | -    |
| 16722 | 1424838_at   | Region | A330049M08Rik | 230822 | 4    | 134251167 | 134279478 | -    |
|       |              |        | Pim2 ///      |        |      |           |           |      |
| 16723 | 1417216_at   | Region | LOC229005     | 18715  | X    | 6117246   | 6122372   | +    |
| 16724 | 1427414_at   | Region | Prkar2a       | 19087  | 9    | 108741435 | 108795663 | +    |
| 16725 | 1418248_at   | Region | Gla           | 11605  | X    | 128133295 | 128145894 | -    |
| 16726 | 1433976_at   | Region | AI265725      | 103168 | 4    | 76613810  | 76614393  | +    |
| 16727 | 1431212_a_at | Region | 3300001M20Rik | 66926  | 2    | 132318068 | 132329908 | -    |
| 16728 | 1443281_at   | Region | C130076O07Rik | 319504 | 12   | 40985533  | 41346376  | +    |
| 16729 | 1424264_at   | Region | Med6          | 69792  | 12   | 78433783  | 78455283  | -    |
| 16730 | 1421943_at   | Region | Tgfa          | 21802  | 6    | 86626355  | 86707058  | +    |
| 16731 | 1420348_at   | Region | Lhx5          | 16873  | 5    | 119583708 | 119593264 | +    |
| 16732 | 1415754_at   | Region | Polr2f        | 69833  | 15   | 79192653  | 79203053  | +    |
| 16733 | 1424514_at   | Region | Rnf126        | 70294  | 10   | 79881163  | 79889548  | -    |
| 16734 | 1431804_a_at | Region | Sp3           | 20687  | 2    | 72634943  | 72710690  | -    |
| 16735 | 1422101_at   | Region | Tnfrsf23      | 79201  | 7    | 138080633 | 138098881 | -    |
| 16736 | 1441727_s_at | Region | Zfp467        | 68910  | 6    | 48570465  | 48578486  | -    |
| 16737 | 1416973_at   | Region | LOC434401     | 434401 | 9    | 48460405  | 48473895  | +    |
| 16738 | 1436896_at   | Region | D14ErtD231e   | 210925 | 14   | 59478323  | 59566706  | +    |
| 16739 | 1447994_at   | Region | 1700026B20Rik | 69434  | 12   | 100474801 | 100476412 | -    |
| 16740 | 1437267_x_at | Region | BC035291      | 208043 | 5    | 122320841 | 122321085 | -    |
| 16741 | 1438360_x_at | Region | Slc25a5       | 11740  | X    | 31416206  | 31419360  | +    |
| 16742 | 1460354_a_at | Region | Mrpl13        | 68537  | 15   | 55539170  | 55562387  | -    |
| 16743 | 1428395_at   | Region | Smurf1        | 75788  | 5    | 143917448 | 144004286 | -    |
| 16744 | 1415976_a_at | Region | Carhsp1       | 52502  | 16   | 8331880   | 8345446   | -    |
| 16745 | 1440691_at   | Region | Cyp2j6        | 13110  | 4    | 95492315  | 95528724  | -    |
| 16746 | 1428097_at   | Region | 2510009E07Rik | 72190  | 16   | 20420556  | 20466125  | -    |
| 16747 | 1438885_at   | Region | BB182387      | 103516 | 10   | 14670967  | 14671652  | +    |
| 16748 | 1430547_s_at | Region | Cryz11        | 66609  | 16   | 90846621  | 90885763  | -    |
| 16749 | 1450706_a_at | Region | Arl3          | 56350  | 19   | 46078947  | 46106113  | -    |
| 16750 | 1421204_a_at | Region | Nudt16        | 75686  | 9    | 105111048 | 105113181 | -    |
| 16751 | 1417284_at   | Region | Mapkap1       | 227743 | 2    | 34339345  | 34556075  | +    |
| 16752 | 1439582_at   | Region | Macf1         | 11426  | 4    | 122378001 | 122711301 | -    |
| 16753 | 1460482_at   | Region | 3110047P20Rik | 319807 | 5    | 62449370  | 62608204  | +    |
| 16754 | 1440601_at   | Region | None          | None   | NONE | NONE      | NONE      | NONE |
| 16755 | 1424667_a_at | Region | Cutl1         | 13047  | 5    | 135261627 | 135499343 | -    |
| 16756 | 1448464_at   | Region | 0610042I15Rik | 56418  | 11   | 5850619   | 5862567   | +    |
| 16757 | 1416302_at   | Region | Ebf1          | 13591  | 11   | 44370971  | 44758012  | +    |
| 16758 | 1438480_a_at | Region | MGI:1925112   | 77862  | 9    | 26893639  | 26901251  | +    |
| 16759 | 1426945_at   | Region | Ranbp5        | 70572  | 14   | 115481885 | 115518633 | +    |
| 16760 | 1452512_a_at | Region | Ank1          | 11733  | 8    | 21812854  | 21905075  | +    |
| 16761 | 1417501_at   | Region | Fbxo6b        | 50762  | 4    | 146638149 | 146644186 | -    |
| 16762 | 1421895_at   | Region | Eif2s3x       | 26905  | X    | 88849367  | 88873309  | -    |
| 16763 | 1415714_a_at | Region | 2610209M04Rik | 66618  | 6    | 87109370  | 87118796  | -    |
| 16764 | 1415761_at   | Region | Mrpl52        | 68836  | 14   | 48943738  | 48946676  | +    |
| 16765 | 1422770_at   | Region | Rad51l3       | 19364  | 11   | 82614373  | 82630248  | -    |
| 16766 | 1426268_at   | Region | C130090K23Rik | 231293 | 5    | 72195907  | 72243364  | +    |
| 16767 | 1446391_at   | Region | Snca          | 20617  | 6    | 60971674  | 61069793  | -    |
| 16768 | 1423733_a_at | Region | Fiz1          | 23877  | 7    | 4254301   | 4261832   | -    |
| 16769 | 1441620_at   | Region | None          | None   | 11   | 11868853  | 11869483  | -    |
| 16770 | 1416426_at   | Region | Rab5a         | 271457 | 17   | 51013405  | 51041849  | +    |
| 16771 | 1423037_at   | Region | Agtrl1        | 23796  | 2    | 84834149  | 84837672  | +    |
| 16772 | 1452016_at   | Region | Alox5ap       | 11690  | 5    | 148165072 | 148186592 | +    |
| 16773 | 1442220_at   | Region | Ube3a         | 22215  | 7    | 53507062  | 53583196  | +    |
| 16774 | 1459066_at   | Region | None          | None   | 8    | 109390040 | 109390397 | -    |
| 16775 | 1442995_at   | Region | None          | None   | 18   | 60961630  | 60962349  | -    |
| 16776 | 1439788_at   | Region | MGC86034      | 408022 | 8    | 45522371  | 45563977  | -    |
| 16777 | 1453294_at   | Region | 1700012B15Rik | 74173  | 12   | 273       | 3622      | +    |
| 16778 | 1445881_at   | Region | 2310035P21Rik | 75683  | 19   | 53483140  | 53483841  | +    |
| 16779 | 1456905_at   | Region | B4galt2       | 53418  | 4    | 116828165 | 116842060 | -    |
| 16780 | 1435474_at   | Region | Taf5          | 226182 | 19   | 46619048  | 46634768  | +    |
| 16781 | 1449824_at   | Region | Prg4          | 96875  | 1    | 150286578 | 150302927 | -    |
| 16782 | 1440283_at   | Region | 1810059H22Rik | 69820  | NONE | NONE      | NONE      | NONE |

|       |              |        |                                                                                      |        |    |           |           |   |
|-------|--------------|--------|--------------------------------------------------------------------------------------|--------|----|-----------|-----------|---|
| 16783 | 1446682_at   | Region | Zswim6<br>Tom1 ///                                                                   | 67263  | 13 | 103950578 | 104158812 | - |
| 16784 | 1431188_a_at | Region | LOC545878                                                                            | 21968  | 8  | 74197771  | 74234173  | + |
| 16785 | 1428835_at   | Region | Myh14                                                                                | 71960  | 7  | 38680631  | 38740313  | - |
| 16786 | 1443633_at   | Region | 1700086O06Rik                                                                        | 73516  | 18 | 38462795  | 38473601  | - |
| 16787 | 1425969_a_at | Region | Hdh                                                                                  | 15194  | 5  | 33249415  | 33397070  | + |
| 16788 | 1458625_at   | Region | None                                                                                 | None   | 16 | 96073255  | 96073824  | - |
| 16789 | 1422776_at   | Region | Serpinb8                                                                             | 20725  | 1  | 107578943 | 107597781 | + |
| 16790 | 1454624_at   | Region | B930096L08Rik                                                                        | 209773 | 6  | 39597808  | 39693264  | - |
| 16791 | 1429634_at   | Region | Zfp580                                                                               | 68992  | 7  | 4300418   | 4302602   | + |
| 16792 | 1416242_at   | Region | Klhl13                                                                               | 67455  | X  | 21458211  | 21603993  | - |
| 16793 | 1439794_at   | Region | None                                                                                 | None   | 10 | 93719737  | 93720538  | + |
| 16794 | 1447147_at   | Region | Apg7l                                                                                | 74244  | 6  | 115108368 | 115295327 | + |
| 16795 | 1459661_at   | Region | AW492955                                                                             | 105362 | 13 | 24690134  | 24690584  | + |
| 16796 | 1424044_at   | Region | Jmjd2b<br>Ppp1r2 ///<br>LOC433058 ///<br>LOC433239 ///<br>LOC546139 ///<br>LOC546723 | 193796 | 17 | 53963133  | 54039904  | + |
| 16797 | 1417342_at   | Region | LOC546723                                                                            | 433058 | 17 | 6159954   | 6161505   | + |
| 16798 | 1430070_at   | Region | 1500035N22Rik                                                                        | 70258  | 5  | 23455391  | 23467712  | + |
| 16799 | 1452301_at   | Region | Aldh3b1                                                                              | 67689  | 19 | 3702281   | 3712691   | - |
| 16800 | 1443026_at   | Region | B130020M22Rik                                                                        | 320217 | 10 | 119050227 | 119050928 | + |
| 16801 | 1453121_at   | Region | 1700010L19Rik                                                                        | 71840  | 17 | 23277441  | 23282445  | + |
| 16802 | 1452484_at   | Region | Car7                                                                                 | 12354  | 8  | 103833942 | 103843478 | + |
| 16803 | 1438441_at   | Region | Idb4                                                                                 | 15904  | 13 | 47859485  | 47862094  | + |
| 16804 | 1417294_at   | Region | Akr7a5                                                                               | 110198 | 4  | 138192005 | 138199686 | + |
| 16805 | 1455320_at   | Region | AI480535                                                                             | 104840 | 12 | 29458299  | 29459571  | + |
| 16806 | 1424512_a_at | Region | Txndc9                                                                               | 98258  | 1  | 38279664  | 38291679  | - |
| 16807 | 1423662_at   | Region | Atp6ap2                                                                              | 70495  | X  | 10826811  | 10855905  | + |
| 16808 | 1415812_at   | Region | Gsn                                                                                  | 227753 | 2  | 35214602  | 35240054  | + |
| 16809 | 1424028_at   | Region | 5830457O10Rik                                                                        | 214987 | 8  | 106181580 | 106191288 | - |
| 16810 | 1423912_at   | Region | Aspscr1                                                                              | 68938  | 11 | 120494132 | 120530540 | + |
| 16811 | 1447040_at   | Region | Alcam                                                                                | 11658  | 16 | 51168811  | 51372049  | - |
| 16812 | 1435498_at   | Region | Arfip2                                                                               | 76932  | 7  | 99750533  | 99755261  | - |
| 16813 | 1416544_at   | Region | Ezh2                                                                                 | 14056  | 6  | 47731971  | 47796710  | - |
| 16814 | 1458582_at   | Region | AI461788                                                                             | 231506 | 5  | 99460839  | 99519278  | - |
| 16815 | 1417386_at   | Region | Npepps                                                                               | 19155  | 11 | 97028020  | 97101650  | - |
| 16816 | 1428084_at   | Region | Hrb2                                                                                 | 52705  | 10 | 111675789 | 111690089 | + |
| 16817 | 1435209_at   | Region | BC057079                                                                             | 230393 | 4  | 87080822  | 87397196  | + |
| 16818 | 1454668_at   | Region | 1810009A16Rik                                                                        | 69116  | 4  | 138281097 | 138370851 | + |
| 16819 | 1452194_at   | Region | Tbcd                                                                                 | 108903 | 11 | 121273095 | 121438261 | + |
| 16820 | 1427526_at   | Region | Fgfr1op2                                                                             | 67529  | 6  | 147498625 | 147519880 | + |
| 16821 | 1446876_at   | Region | Wdr22                                                                                | 320808 | 12 | 77197394  | 77297795  | - |
| 16822 | 1444722_at   | Region | Psme4                                                                                | 103554 | 11 | 30666852  | 30774524  | + |
| 16823 | 1455057_at   | Region | Gmps                                                                                 | 229363 | 3  | 63642160  | 63687698  | + |
| 16824 | 1454732_at   | Region | Bpy2ip1                                                                              | 270058 | 8  | 70061700  | 70073238  | + |
| 16825 | 1453614_a_at | Region | Nfe2l3                                                                               | 18025  | 6  | 51579895  | 51606046  | + |
| 16826 | 1430762_at   | Region | 4833427G06Rik                                                                        | 235345 | 9  | 51153639  | 51174404  | - |
| 16827 | 1441044_at   | Region | C130002M15Rik                                                                        | 319741 | 16 | 42825408  | 42826081  | + |
| 16828 | 1423155_at   | Region | Sri                                                                                  | 109552 | 5  | 8054494   | 8076270   | + |
| 16829 | 1456622_at   | Region | Camsap1                                                                              | 227634 | 2  | 25860417  | 25927345  | - |
| 16830 | 1446938_at   | Region | AA408213                                                                             | 100498 | 5  | 145946467 | 145946881 | - |
| 16831 | 1420951_a_at | Region | Son                                                                                  | 20658  | 16 | 90805044  | 90836353  | + |
| 16832 | 1433773_at   | Region | Rrm2b                                                                                | 382985 | 15 | 37928889  | 37965992  | - |
| 16833 | 1459230_at   | Region | Plod2                                                                                | 26432  | 9  | 92437061  | 92503040  | + |
| 16834 | 1430991_at   | Region | 1810014B01Rik                                                                        | 544717 | 10 | 82507736  | 82511798  | - |
| 16835 | 1434029_at   | Region | LOC545794                                                                            | 545794 | 5  | 109470398 | 109498632 | - |
| 16836 | 1436385_at   | Region | Ganc                                                                                 | 76051  | 2  | 119918051 | 119974715 | + |
| 16837 | 1424657_at   | Region | Taok1                                                                                | 216965 | 11 | 77255718  | 77311108  | - |
| 16838 | 1456215_at   | Region | Tfam                                                                                 | 21780  | 10 | 71279444  | 71292011  | - |
| 16839 | 1458056_at   | Region | Sfrs12                                                                               | 218543 | 13 | 99959715  | 99982622  | - |
| 16840 | 1456626_a_at | Region | 1110005A23Rik                                                                        | 66118  | 10 | 128559009 | 128614707 | + |
| 16841 | 1451591_a_at | Region | Efnb1                                                                                | 13641  | X  | 93737491  | 93750352  | + |
| 16842 | 1417560_at   | Region | Sfxn1                                                                                | 14057  | 13 | 52636174  | 52672650  | + |

|       |              |        |               |        |    |           |           |   |
|-------|--------------|--------|---------------|--------|----|-----------|-----------|---|
| 16843 | 1422017_s_at | Region | 4833439L19Rik | 97820  | 13 | 53160979  | 53175095  | - |
| 16844 | 1430613_at   | Region | 1520402A15Rik | 68075  | 4  | 115096204 | 115103521 | - |
| 16845 | 1439055_at   | Region | None          | None   | 11 | 88785745  | 88786362  | - |
| 16846 | 1440219_at   | Region | BC055915      | 211660 | 1  | 10178667  | 10241764  | + |
| 16847 | 1436915_x_at | Region | Laptm4b       | 114128 | 15 | 34237699  | 34283968  | + |
| 16848 | 1424583_at   | Region | Farp2         | 227377 | 1  | 93339616  | 93449273  | + |
| 16849 | 1436131_at   | Region | 6430529G09Rik | 233274 | 7  | 50037705  | 50048312  | + |
| 16850 | 1448567_at   | Region | C78915        | 56395  | 9  | 107599726 | 107604437 | + |
| 16851 | 1427376_a_at | Region | Map4k5        | 399510 | 12 | 66635229  | 66724562  | - |
| 16852 | 1417247_at   | Region | AI597479      | 98404  | 1  | 43393427  | 43410663  | + |
| 16853 | 1434984_at   | Region | 6330514A18Rik | 216166 | 10 | 80481671  | 80492695  | + |
| 16854 | 1434793_at   | Region | BC028975      | 242584 | 4  | 101996974 | 102073129 | - |
| 16855 | 1423328_at   | Region | Gdap1         | 14545  | 1  | 17329856  | 17348730  | + |
| 16856 | 1423650_at   | Region | LOC545856     | 545856 | 6  | 76842195  | 76844739  | - |
| 16857 | 1423351_at   | Region | Mrpl1         | 94061  | 5  | 95228007  | 95282266  | + |
| 16858 | 1444735_at   | Region | D6Erd365e     | 387524 | 6  | 54961241  | 55034061  | + |
| 16859 | 1415697_at   | Region | E430034L04Rik | 23881  | 5  | 91390328  | 91419486  | - |
| 16860 | 1429720_at   | Region | Mak10         | 78689  | 13 | 58245009  | 58294396  | + |
| 16861 | 1438451_at   | Region | MGI:2450166   | 330914 | 9  | 32129387  | 32182471  | + |
| 16862 | 1424265_at   | Region | Npl           | 74091  | 1  | 153388014 | 153434345 | - |
| 16863 | 1434286_at   | Region | Trps1         | 83925  | 15 | 50659276  | 50888038  | - |
| 16864 | 1446514_at   | Region | Dpp10         | 269109 | 1  | 123096743 | 123812573 | - |
| 16865 | 1453744_a_at | Region | Ankrd40       | 71452  | 11 | 94149236  | 94161010  | + |
| 16866 | 1416769_s_at | Region | Atp6v0b       | 114143 | 4  | 116843235 | 116846234 | - |
| 16867 | 1430985_at   | Region | 1810027O10Rik | 69186  | 11 | 69564182  | 69565267  | + |
| 16868 | 1450868_at   | Region | D8Erd354e     | 52120  | 8  | 24669208  | 24671231  | - |
| 16869 | 1451742_a_at | Region | Ugp2          | 216558 | 11 | 21215937  | 21265268  | - |
| 16870 | 1428913_at   | Region | D2Bwg1335e    | 52838  | 2  | 26280280  | 26284262  | - |
| 16871 | 1456292_a_at | Region | Vim           | 22352  | 2  | 13489961  | 13498816  | + |
| 16872 | 1430702_at   | Region | 5830427D03Rik | 76061  | 15 | 98817582  | 98819633  | - |
| 16873 | 1424247_at   | Region | Rab6ip2       | 111173 | 6  | 120007511 | 120280559 | - |
| 16874 | 1455349_at   | Region | Rap1b         | 215449 | 10 | 117505589 | 117536966 | - |
| 16875 | 1431018_at   | Region | 1810013L24Rik | 69053  | 16 | 8502119   | 8528217   | + |
| 16876 | 1422982_at   | Region | Ar            | 11835  | X  | 92751111  | 92918508  | + |
| 16877 | 1423643_at   | Region | Ddx39         | 68278  | 8  | 82975115  | 82983264  | + |
| 16878 | 1456304_at   | Region | Gm996         | 381353 | 2  | 25507592  | 25512261  | - |
| 16879 | 1428232_at   | Region | Cpsf6         | 432508 | 10 | 117034119 | 117066391 | - |
| 16880 | 1426450_at   | Region | Plcl2         | 224860 | 17 | 48041884  | 48220970  | + |
| 16881 | 1426627_at   | Region | None          | None   | 4  | 32242902  | 32300043  | + |
| 16882 | 1443521_at   | Region | Ggnbp2        | 217039 | 11 | 84560721  | 84598730  | - |
| 16883 | 1445224_at   | Region | Ap3b2         | 11775  | 7  | 75268542  | 75301907  | - |
| 16884 | 1434187_at   | Region | None          | None   | 8  | 20822628  | 20823670  | + |
| 16885 | 1434919_at   | Region | Agps          | 228061 | 2  | 75529941  | 75627399  | + |
| 16886 | 1450337_a_at | Region | Nek8          | 140859 | 11 | 77892179  | 77902325  | - |
| 16887 | 1420444_at   | Region | Slc22a3       | 20519  | 17 | 11059072  | 11146804  | - |
| 16888 | 1417154_at   | Region | Slc25a14      | 20523  | X  | 43144374  | 43183090  | + |
| 16889 | 1417782_at   | Region | Lass4         | 67260  | 8  | 3848044   | 3880287   | + |
| 16890 | 1440329_s_at | Region | Gpatc2        | 67769  | 1  | 186723158 | 186859064 | + |
| 16891 | 1425630_at   | Region | Sin3b         | 20467  | 8  | 71873343  | 71907207  | + |
| 16892 | 1418452_at   | Region | Gng2          | 14702  | 14 | 18235904  | 18323407  | - |
| 16893 | 1433982_at   | Region | Usp28         | 235323 | 9  | 49014954  | 49072769  | + |
| 16894 | 1436374_x_at | Region | F11r          | 16456  | 1  | 171366400 | 171393432 | + |
| 16895 | 1449408_at   | Region | Jam2          | 67374  | 16 | 83882574  | 83932843  | + |
| 16896 | 1433698_a_at | Region | D18Wsu98e     | 28062  | 18 | 80330416  | 80336262  | + |
| 16897 | 1455557_at   | Region | LOC553095     | 553095 | 13 | 80118979  | 80157275  | - |
| 16898 | 1422727_at   | Region | Nme5          | 75533  | 18 | 34785745  | 34801708  | - |
| 16899 | 1454309_at   | Region | 2810002N01Rik | 68020  | 12 | 107191903 | 107212849 | + |
| 16900 | 1444736_at   | Region | Cdh7          | 241201 | 1  | 109972834 | 110128098 | + |
| 16901 | 1425578_a_at | Region | Gfra2         | 14586  | 14 | 65206370  | 65294008  | + |
| 16902 | 1429617_at   | Region | Cyld          | 74256  | 8  | 87990637  | 88033868  | + |
| 16903 | 1450174_at   | Region | Ptptr         | 19281  | 2  | 160984592 | 162118116 | - |
| 16904 | 1442052_at   | Region | C330019G07Rik | 215476 | 5  | 31277729  | 31316129  | - |
| 16905 | 1423051_at   | Region | Hnrpu         | 51810  | 1  | 178283700 | 178291584 | - |
| 16906 | 1425010_at   | Region | Zfp119        | 104349 | 17 | 53503078  | 53517139  | - |
| 16907 | 1455487_at   | Region | 2600014M03Rik | 69900  | 11 | 116675108 | 116696753 | + |

|       |              |        |                   |        |      |           |           |      |
|-------|--------------|--------|-------------------|--------|------|-----------|-----------|------|
| 16908 | 1436098_at   | Region | None              | None   | NONE | NONE      | NONE      | NONE |
| 16909 | 1438886_at   | Region | Heyl              | 56198  | 4    | 122260965 | 122276982 | +    |
| 16910 | 1435108_at   | Region | Arhgap22          | 239027 | 14   | 31353150  | 31504377  | +    |
| 16911 | 1421334_x_at | Region | Mynn              | 80732  | 3    | 30012186  | 30028739  | +    |
| 16912 | 1436346_at   | Region | Cd109             | 235505 | 9    | 78815469  | 78916251  | +    |
| 16913 | 1444973_at   | Region | Kcnma1            | 16531  | 14   | 21672901  | 22164598  | -    |
| 16914 | 1446613_at   | Region | 1190005F20Rik     | 98685  | 1    | 151302852 | 151303493 | +    |
| 16915 | 1426778_at   | Region | Dag1              | 13138  | 9    | 108271876 | 108333355 | -    |
| 16916 | 1424038_a_at | Region | 2310044H10Rik     | 69683  | 7    | 38565409  | 38571690  | -    |
| 16917 | 1415926_at   | Region | Nup62             | 18226  | 7    | 38891347  | 38905734  | +    |
| 16918 | 1445178_at   | Region | Sh3md2            | 59009  | 8    | 60271818  | 60461252  | +    |
| 16919 | 1460718_s_at | Region | Mtch1             | 56462  | 17   | 27144760  | 27160995  | -    |
| 16920 | 1455625_at   | Region | None              | None   | 7    | 99854045  | 99854808  | -    |
| 16921 | 1418359_at   | Region | Wbscr27           | 79565  | 5    | 133945865 | 133956129 | +    |
| 16922 | 1429082_at   | Region | D5Erttd585e       | 71782  | 5    | 109281825 | 109307432 | +    |
| 16923 | 1436956_at   | Region | Bace1             | 23821  | 9    | 45851835  | 45875693  | +    |
| 16924 | 1450973_s_at | Region | Mapkbp1           | 26390  | 2    | 119486752 | 119539188 | +    |
| 16925 | 1451717_s_at | Region | Senp2             | 75826  | 16   | 20782192  | 20820660  | +    |
| 16926 | 1422047_at   | Region | Cdh5              | 12562  | 8    | 103396382 | 103438830 | +    |
| 16927 | 1434257_s_at | Region | Pitpnb            | 56305  | 5    | 110380456 | 110438052 | +    |
| 16928 | 1430685_at   | Region | 6330503C03Rik     | 76156  | 6    | 42461663  | 42468459  | -    |
| 16929 | 1424579_at   | Region | Slc35a3           | 229782 | 3    | 115439734 | 115481216 | -    |
| 16930 | 1436249_at   | Region | Ttll4             | 67534  | 1    | 74991849  | 75001071  | +    |
| 16931 | 1442535_at   | Region | None              | None   | 9    | 65927470  | 65928059  | -    |
| 16932 | 1425749_at   | Region | Stxbp6            | 217517 | 12   | 41600913  | 41820407  | -    |
| 16933 | 1441867_x_at | Region | 4930534B04Rik     | 75216  | 12   | 86694447  | 86789217  | -    |
| 16934 | 1431092_at   | Region | Ppp1r12c          | 232807 | 7    | 3721021   | 3732838   | -    |
| 16935 | 1449523_at   | Region | Bcl7c             | 12055  | 7    | 121754709 | 121758497 | -    |
| 16936 | 1453054_at   | Region | Scamp1            | 107767 | 13   | 90385498  | 90469347  | -    |
| 16937 | 1429499_at   | Region | Fbxo5             | 67141  | 10   | 4705451   | 4711373   | +    |
| 16938 | 1451374_x_at | Region | Cklf              | 75458  | 8    | 103545239 | 103557779 | +    |
| 16939 | 1457593_at   | Region | 2610202C22Rik     | 72493  | 10   | 58242224  | 58242771  | +    |
| 16940 | 1422206_at   | Region | B3galt1           | 26877  | 2    | 67973343  | 67974323  | +    |
| 16941 | 1452282_at   | Region | Crsp7             | 70625  | 8    | 71645137  | 71698918  | -    |
| 16942 | 1415681_at   | Region | Mrpl43            | 94067  | 19   | 44549420  | 44550848  | -    |
| 16943 | 1441262_at   | Region | None              | None   | 19   | 47179184  | 47179656  | +    |
| 16944 | 1426871_at   | Region | Fbxo33            | 70611  | 12   | 55933702  | 55953036  | -    |
| 16945 | 1438809_at   | Region | Atp5c1            | 11949  | 2    | 9972148   | 9996543   | -    |
| 16946 | 1427090_at   | Region | Zbed4             | 223773 | 15   | 88806694  | 88836445  | +    |
| 16947 | 1438396_at   | Region | Ocl1              | 320634 | X    | 42433252  | 42486664  | +    |
| 16948 | 1427078_at   | Region | Snx19             | 102607 | 9    | 30343376  | 30382899  | +    |
| 16949 | 1443747_at   | Region | D3Erttd300e       | 56790  | 3    | 54327325  | 54351057  | +    |
| 16950 | 1443296_at   | Region | Pctk1             | 18555  | X    | 18927433  | 18938817  | +    |
| 16951 | 1434625_at   | Region | None              | None   | NONE | NONE      | NONE      | NONE |
| 16952 | 1456853_at   | Region | None              | None   | 10   | 82258103  | 82258445  | +    |
| 16953 | 1438617_at   | Region | None              | None   | X    | 132624193 | 132624537 | -    |
| 16954 | 1444848_at   | Region | R3hdm             | 226412 | 1    | 127946018 | 128080726 | +    |
| 16955 | 1439440_x_at | Region | Ptk9l             | 23999  | 9    | 106196703 | 106208982 | +    |
| 16956 | 1421432_at   | Region | Arl10a            | 56795  | 13   | 53185314  | 53191400  | +    |
| 16957 | 1415950_a_at | Region | Pbp               | 23980  | 5    | 116411434 | 116416327 | -    |
| 16958 | 1433664_at   | Region | 3010021M21Rik     | 109161 | 9    | 55261748  | 55318919  | +    |
| 16959 | 1427957_at   | Region | 9530008L14Rik     | 109254 | 13   | 41322369  | 41397818  | -    |
| 16960 | 1416357_a_at | Region | Mcam              | 84004  | 9    | 44123526  | 44131579  | +    |
| 16961 | 1453430_at   | Region | 2010315L10Rik     | 67023  | 8    | 70517056  | 70519559  | +    |
| 16962 | 1437513_a_at | Region | Tde2              | 56442  | 10   | 57778279  | 57794950  | -    |
| 16963 | 1456219_at   | Region | Zic5              | 65100  | 14   | 117028709 | 117035237 | -    |
|       |              |        | 2610019N19Rik /// |        |      |           |           |      |
| 16964 | 1423617_at   | Region | Cog8              | 68023  | 8    | 106343774 | 106346361 | -    |
| 16965 | 1423552_at   | Region | Leprotl1          | 68192  | 8    | 32936611  | 32947770  | -    |
| 16966 | 1457170_at   | Region | Lrrc36            | 270091 | 8    | 104709250 | 104751133 | +    |
| 16967 | 1426801_at   | Region | 38603             | 20362  | 11   | 53272641  | 53296937  | +    |
| 16968 | 1421940_at   | Region | Stag1             | 20842  | 9    | 100545170 | 100860091 | +    |
| 16969 | 1419554_at   | Region | Cd47              | 16423  | 16   | 48697237  | 48753271  | +    |
| 16970 | 1440612_at   | Region | Rbbp8             | 225182 | 18   | 11845010  | 11930602  | +    |
| 16971 | 1459595_at   | Region | None              | None   | 5    | 110079227 | 110079602 | +    |

|       |              |        |               |        |      |           |           |      |
|-------|--------------|--------|---------------|--------|------|-----------|-----------|------|
| 16972 | 1424620_at   | Region | D13Wsu177e    | 28126  | 13   | 53194546  | 53200435  | -    |
| 16973 | 1429151_at   | Region | Wdr68         | 71833  | 11   | 105857961 | 105876453 | +    |
| 16974 | 1416712_at   | Region | Pep4          | 18624  | 7    | 30066190  | 30200069  | +    |
| 16975 | 1416238_at   | Region | Tie1          | 21846  | 4    | 117430096 | 117448966 | -    |
| 16976 | 1434644_at   | Region | Tbl1x         | 21372  | X    | 72294199  | 72320920  | +    |
| 16977 | 1458187_at   | Region | Plcd4         | 18802  | 1    | 74846994  | 74868444  | +    |
| 16978 | 1456886_at   | Region | None          | None   | 12   | 106344593 | 106345230 | +    |
| 16979 | 1434985_a_at | Region | Eif4a1        | 13681  | 11   | 69392597  | 69397973  | -    |
| 16980 | 1459415_at   | Region | None          | None   | 11   | 61866732  | 61867367  | +    |
| 16981 | 1433856_at   | Region | AW555814      | 227399 | 1    | 97486245  | 97541628  | -    |
| 16982 | 1440390_at   | Region | BC025575      | 217219 | 11   | 102258068 | 102268730 | -    |
| 16983 | 1439937_at   | Region | None          | None   | 14   | 50163706  | 50164327  | +    |
| 16984 | 1451202_at   | Region | C330007P06Rik | 77644  | X    | 31444291  | 31484792  | -    |
| 16985 | 1430308_at   | Region | 5730409N16Rik | 70475  | 12   | 69886395  | 69888767  | +    |
| 16986 | 1460210_at   | Region | Pkd1          | 18763  | 17   | 22353535  | 22400068  | +    |
| 16987 | 1424198_at   | Region | Dlg5          | 71228  | 14   | 22497841  | 22611777  | -    |
| 16988 | 1425315_at   | Region | Dock7         | 67299  | 4    | 97911748  | 97959905  | -    |
| 16989 | 1428957_at   | Region | 2300008B03Rik | 66343  | 1    | 119661146 | 119664607 | -    |
| 16990 | 1433094_at   | Region | Slc1a2        | 20511  | 2    | 102411192 | 102482860 | +    |
| 16991 | 1428194_at   | Region | Usp9x         | 22284  | X    | 11310477  | 11410726  | +    |
| 16992 | 1432274_at   | Region | 4930543N07Rik | 75187  | 7    | 132940484 | 132953189 | +    |
| 16993 | 1436925_at   | Region | Ches1         | 71375  | 12   | 94622265  | 94816088  | -    |
| 16994 | 1435074_at   | Region | 2310036D22Rik | 71900  | 6    | 13057102  | 13072310  | +    |
| 16995 | 1454711_at   | Region | Trio          | 223435 | 15   | 27358260  | 27724087  | -    |
| 16996 | 1443436_at   | Region | Map2k2        | 26396  | 10   | 81240906  | 81258829  | +    |
| 16997 | 1418777_at   | Region | Ccl25         | 20300  | 8    | 3706166   | 3716677   | +    |
| 16998 | 1420747_at   | Region | MGI:1349458   | 26930  | 19   | 55428551  | 55431406  | +    |
| 16999 | 1417935_at   | Region | Mkrm2         | 67027  | 6    | 116039545 | 116056254 | +    |
| 17000 | 1449100_at   | Region | Pard6a        | 56513  | 8    | 104997459 | 104999242 | +    |
| 17001 | 1432513_a_at | Region | 1700001C02Rik | 75434  | 5    | 28925023  | 28943033  | +    |
| 17002 | 1445888_x_at | Region | Parp3         | 235587 | 9    | 106534690 | 106540942 | -    |
| 17003 | 1450144_at   | Region | Pla2g1br      | 18779  | 2    | 60274439  | 60408661  | -    |
| 17004 | 1459854_s_at | Region | Tcte1l        | 67117  | X    | 7893210   | 7901923   | -    |
| 17005 | 1438032_at   | Region | Lrch1         | 380916 | 14   | 69108806  | 69291857  | -    |
| 17006 | 1448369_at   | Region | Pola2         | 18969  | 19   | 5729336   | 5752960   | -    |
| 17007 | 1446571_at   | Region | Mlr1          | 209707 | 5    | 44458346  | 44613918  | -    |
| 17008 | 1424713_at   | Region | Calml4        | 75600  | 9    | 62980601  | 62998416  | +    |
| 17009 | 1451000_at   | Region | 1810020E01Rik | 66271  | 7    | 84500510  | 84507121  | -    |
| 17010 | 1439107_a_at | Region | Mll5          | 69188  | 5    | 21950220  | 21960092  | +    |
| 17011 | 1421747_at   | Region | Esrrg         | 26381  | 1    | 187506691 | 187723715 | +    |
| 17012 | 1428073_a_at | Region | Nup88         | 19069  | 11   | 70668716  | 70695619  | -    |
| 17013 | 1450748_at   | Region | Smpd3         | 58994  | 8    | 105548395 | 105633835 | -    |
| 17014 | 1422146_at   | Region | Sema5b        | 20357  | 16   | 34397801  | 34447067  | +    |
| 17015 | 1418525_at   | Region | Pcm1          | 18536  | 8    | 40177407  | 40269978  | +    |
| 17016 | 1447976_at   | Region | Al596198      | 99029  | 2    | 149859678 | 149860364 | -    |
| 17017 | 1456818_at   | Region | Stk32a        | 269019 | 18   | 43427684  | 43537468  | +    |
| 17018 | 1425302_at   | Region | BC024997      | 215723 | 11   | 68281844  | 68283903  | +    |
| 17019 | 1460459_at   | Region | Paqr5         | 74090  | 9    | 62073688  | 62146820  | -    |
| 17020 | 1420814_at   | Region | Gdi3          | 14569  | 13   | 3422528   | 3450201   | +    |
| 17021 | 1436883_at   | Region | Mbtps2        | 270669 | X    | 151149345 | 151198055 | -    |
| 17022 | 1417854_at   | Region | Map2k5        | 23938  | 9    | 63284916  | 63498276  | -    |
| 17023 | 1436801_x_at | Region | Cdc42ep4      | 56699  | 11   | 113547943 | 113572411 | -    |
| 17024 | 1455196_s_at | Region | AA987161      | 380856 | 13   | 64191293  | 64211253  | -    |
| 17025 | 1449068_at   | Region | Zfp148        | 22661  | 16   | 32188918  | 32308456  | +    |
| 17026 | 1443350_at   | Region | None          | None   | 17   | 81656741  | 81657367  | +    |
| 17027 | 1441475_at   | Region | None          | None   | 13   | 56813529  | 56814207  | -    |
| 17028 | 1439508_at   | Region | A730055L17Rik | 320652 | NONE | NONE      | NONE      | NONE |
| 17029 | 1427412_s_at | Region | Rapgef6       | 192786 | 11   | 54410160  | 54451128  | +    |
| 17030 | 1451832_at   | Region | Cklf          | 75458  | 8    | 103545239 | 103557779 | +    |
| 17031 | 1443779_s_at | Region | A630025C20Rik | 212391 | 19   | 41094011  | 41104153  | +    |
| 17032 | 1427009_at   | Region | Lama5         | 16776  | 2    | 179893403 | 179942812 | -    |
| 17033 | 1447878_s_at | Region | Fgfrl1        | 116701 | 5    | 107770717 | 107783113 | +    |
| 17034 | 1436400_at   | Region | None          | None   | 3    | 33512020  | 33513142  | +    |
| 17035 | 1428487_s_at | Region | 1500041J02Rik | 67876  | 1    | 55354394  | 55373108  | +    |
| 17036 | 1429255_at   | Region | 2010007H12Rik | 69871  | 5    | 136729518 | 136730707 | +    |

|       |              |        |               |        |    |           |           |   |
|-------|--------------|--------|---------------|--------|----|-----------|-----------|---|
| 17037 | 1441022_at   | Region | Arih1         | 23806  | 9  | 59509355  | 59603044  | - |
| 17038 | 1435822_at   | Region | D830012I24Rik | 320070 | X  | 99111808  | 99112922  | + |
| 17039 | 1445207_at   | Region | D230050A05    | 208426 | 3  | 67713505  | 67728904  | + |
| 17040 | 1423879_at   | Region | D030056L22    | 225995 | 19 | 17960188  | 17965380  | + |
| 17041 | 1450019_at   | Region | Cx3cr1        | 13051  | 9  | 120059072 | 120078236 | - |
| 17042 | 1434103_at   | Region | AA408278      | 101934 | 8  | 71630980  | 71633661  | - |
| 17043 | 1435838_at   | Region | LOC268782     | 268782 | 15 | 10223728  | 10224163  | + |
| 17044 | 1418473_at   | Region | Cutc          | 66388  | 19 | 43297402  | 43313037  | + |
| 17045 | 1419031_at   | Region | Fads2         | 56473  | 19 | 9260661   | 9298000   | - |
| 17046 | 1426629_at   | Region | Dhx8          | 217207 | 11 | 101554043 | 101588445 | + |
| 17047 | 1450309_at   | Region | Astn2         | 56079  | 4  | 64471994  | 65495676  | - |
| 17048 | 1417769_at   | Region | None          | None   | 14 | 11426901  | 11490818  | - |
| 17049 | 1457058_at   | Region | Adamts2       | 216725 | 11 | 50354926  | 50556890  | + |
| 17050 | 1436157_at   | Region | Ccar1         | 67500  | 10 | 62710847  | 62758641  | - |
| 17051 | 1419042_at   | Region | ligp1         | 60440  | 18 | 60615121  | 60617960  | + |
| 17052 | 1448620_at   | Region | Fcgr3         | 14131  | 1  | 170986418 | 170994875 | - |
| 17053 | 1441059_at   | Region | 1700049G17Rik | 73430  | 7  | 23299727  | 23300353  | + |
| 17054 | 1420395_a_at | Region | Kif9          | 16578  | 9  | 110518322 | 110566471 | + |
| 17055 | 1450059_at   | Region | None          | None   | 4  | 42918265  | 42926429  | - |
| 17056 | 1426687_at   | Region | Map3k3        | 26406  | 11 | 105918079 | 105976535 | + |
| 17057 | 1454839_a_at | Region | D630044F24Rik | 382073 | 9  | 44399433  | 44406876  | - |
| 17058 | 1448446_at   | Region | Deaf1         | 54006  | 7  | 135699172 | 135729565 | - |
| 17059 | 1460376_a_at | Region | Cox15         | 226139 | 19 | 43279531  | 43297387  | - |
| 17060 | 1416080_at   | Region | Adam15        | 11490  | 3  | 89096372  | 89106699  | - |
| 17061 | 1448194_a_at | Region | H19           | 14955  | 7  | 136988551 | 136991165 | - |
| 17062 | 1442715_at   | Region | Tsga8         | 60600  | X  | 78147334  | 78148580  | - |
| 17063 | 1458108_at   | Region | Ptcd2         | 68927  | 13 | 95508567  | 95533596  | - |
| 17064 | 1455823_at   | Region | Bbs4          | 102774 | 9  | 59438725  | 59470219  | - |
| 17065 | 1421797_a_at | Region | Snx12         | 55988  | X  | 95813629  | 95823851  | - |
| 17066 | 1416919_a_at | Region | Nphp1         | 53885  | 2  | 127254585 | 127302707 | - |
| 17067 | 1436931_at   | Region | Rfx4          | 71137  | 10 | 84732808  | 84767164  | + |
| 17068 | 1416233_at   | Region | Eif3s2        | 54709  | 4  | 128619087 | 128627726 | - |
| 17069 | 1427590_at   | Region | Zfp39         | 22698  | 11 | 58613782  | 58629854  | - |
| 17070 | 1445941_at   | Region | Atbf1         | 11906  | 8  | 108012331 | 108254925 | + |
| 17071 | 1441490_at   | Region | Tmem39a       | 67846  | 16 | 37385037  | 37413429  | + |
| 17072 | 1439161_at   | Region | D19Ertd703e   | 52036  | 19 | 3243622   | 3364414   | - |
| 17073 | 1421539_at   | Region | Zic4          | 22774  | 9  | 91269057  | 91275258  | + |
| 17074 | 1420276_x_at | Region | None          | None   | 14 | 32540188  | 32540403  | + |
| 17075 | 1459851_x_at | Region | Riok1         | 71340  | 13 | 37576092  | 37600226  | + |
| 17076 | 1433724_at   | Region | D15Ertd621e   | 210998 | 15 | 58436372  | 58467006  | + |
| 17077 | 1419114_at   | Region | 5430428G01Rik | 66789  | 3  | 120073487 | 120141148 | + |
| 17078 | 1442013_at   | Region | 4930532D21Rik | 320022 | 8  | 103739854 | 103803022 | - |
| 17079 | 1424021_at   | Region | Arl6ip6       | 65103  | 2  | 53124273  | 53151188  | + |
| 17080 | 1455799_at   | Region | Rorb          | 225998 | 19 | 18184597  | 18248073  | - |
| 17081 | 1440992_at   | Region | 3110052M02Rik | 73229  | 17 | 19528262  | 19534084  | + |
| 17082 | 1425640_at   | Region | Aff1          | 17355  | 5  | 102817913 | 102885914 | + |
| 17083 | 1437705_at   | Region | None          | None   | 7  | 10459348  | 10459633  | - |
| 17084 | 1455299_at   | Region | 1700110N18Rik | 73569  | 16 | 64821348  | 64869062  | + |
| 17085 | 1459000_at   | Region | Sympk         | 68188  | 7  | 15893026  | 15923378  | + |
| 17086 | 1455733_at   | Region | A130052D22    | 330177 | 5  | 116369746 | 116402638 | + |
| 17087 | 1431638_at   | Region | 4930592A05Rik | 75880  | 15 | 33592907  | 33651627  | - |
| 17088 | 1426374_at   | Region | 2410166I05Rik | 76824  | 4  | 133486465 | 133493655 | - |
| 17089 | 1457834_at   | Region | Yy1           | 22632  | 12 | 104264095 | 104287625 | + |
| 17090 | 1418515_at   | Region | Mtf2          | 17765  | 5  | 107157468 | 107177436 | + |
| 17091 | 1456806_at   | Region | A130010C12Rik | 320211 | 8  | 116595124 | 116595813 | + |
| 17092 | 1456717_at   | Region | Tead1         | 21676  | 7  | 106533225 | 106753684 | + |
| 17093 | 1423611_at   | Region | Akp2          | 11647  | 4  | 136623000 | 136677584 | - |
| 17094 | 1449996_a_at | Region | Tpm3          | 59069  | 3  | 89883112  | 89911022  | + |
| 17095 | 1416678_at   | Region | Cops3         | 26572  | 11 | 59543433  | 59565396  | - |
| 17096 | 1421014_a_at | Region | Clybl         | 69634  | 14 | 116879361 | 116970824 | + |
| 17097 | 1435836_at   | Region | Pdk1          | 228026 | 2  | 71570967  | 71599744  | + |
| 17098 | 1431029_at   | Region | 1700016F23Rik | 74711  | 2  | 152419442 | 152460140 | + |
| 17099 | 1436869_at   | Region | Shh           | 20423  | 5  | 26906864  | 26917112  | - |
| 17100 | 1417534_at   | Region | Itgb5         | 16419  | 16 | 32637841  | 32757227  | + |
| 17101 | 1448008_at   | Region | Ankhd1        | 108857 | 18 | 36858496  | 36869011  | + |

|       |              |        |                   |        |    |           |           |   |
|-------|--------------|--------|-------------------|--------|----|-----------|-----------|---|
| 17102 | 1446999_at   | Region | None              | None   | 2  | 169504669 | 169505227 | + |
| 17103 | 1457373_at   | Region | 4921525D07Rik     | 70880  | 1  | 110880851 | 110881643 | - |
| 17104 | 1431082_a_at | Region | Rabl3             | 67657  | 16 | 36359367  | 36391849  | + |
|       |              |        | Slc25a5 ///       |        |    |           |           |   |
|       |              |        | LOC383528 ///     |        |    |           |           |   |
|       |              |        | LOC433326 ///     |        |    |           |           |   |
|       |              |        | LOC433923 ///     |        |    |           |           |   |
| 17105 | 1438545_at   | Region | LOC545025         | 11740  | X  | 31416206  | 31419360  | + |
| 17106 | 1426218_at   | Region | Glccl1            | 170772 | 6  | 8234651   | 8573400   | + |
| 17107 | 1417583_a_at | Region | Criz1             | 65961  | 5  | 87822320  | 87822934  | + |
| 17108 | 1427457_a_at | Region | Bmp1              | 12153  | 14 | 64790547  | 64836177  | - |
| 17109 | 1418739_at   | Region | Sgk2              | 27219  | 2  | 162444515 | 162471096 | + |
| 17110 | 1415730_at   | Region | 5730453I16Rik     | 269061 | 19 | 9721763   | 9744150   | + |
| 17111 | 1434344_at   | Region | Gpkow             | 209416 | X  | 5936153   | 5949197   | + |
| 17112 | 1426098_a_at | Region | Cast              | 12380  | 13 | 70751497  | 70865131  | - |
| 17113 | 1426086_a_at | Region | Fmr1              | 14265  | X  | 63347151  | 63386559  | + |
| 17114 | 1451098_at   | Region | Pcoln3            | 234852 | 8  | 122579147 | 122587621 | - |
| 17115 | 1448122_at   | Region | Tcp1              | 21454  | 17 | 11607834  | 11615885  | - |
| 17116 | 1416948_at   | Region | Mrpl23            | 19935  | 7  | 136946136 | 136953761 | + |
| 17117 | 1425732_a_at | Region | Mxi1              | 17859  | 19 | 52878345  | 52941221  | + |
| 17118 | 1459895_at   | Region | C030010B13Rik     | 77310  | 2  | 173046327 | 173120005 | - |
| 17119 | 1424691_at   | Region | 5930434B04Rik     | 381356 | 2  | 26942112  | 26953251  | + |
|       |              |        | 2010001E11Rik /// |        |    |           |           |   |
| 17120 | 1451760_s_at | Region | Al317395          | 215929 | 10 | 40071458  | 40102306  | - |
| 17121 | 1446392_at   | Region | Slit2             | 20563  | 5  | 46748038  | 47069334  | + |
| 17122 | 1442168_at   | Region | A230071A22Rik     | 320380 | 6  | 35215568  | 35216390  | - |
| 17123 | 1451887_at   | Region | Lrba              | 80877  | 3  | 85969078  | 86527074  | + |
| 17124 | 1419447_s_at | Region | None              | None   | 5  | 62958072  | 63148140  | + |
| 17125 | 1443500_at   | Region | Mlit10            | 17354  | 2  | 18097281  | 18254400  | + |
| 17126 | 1460720_at   | Region | Trpc4ap           | 56407  | 2  | 155091245 | 155149269 | - |
| 17127 | 1425272_at   | Region | Emp2              | 13731  | 16 | 9952848   | 9985199   | - |
| 17128 | 1439673_at   | Region | E230008O15Rik     | 319862 | 5  | 30931786  | 30932506  | + |
| 17129 | 1418443_at   | Region | Xpo1              | 103573 | 11 | 23150860  | 23192321  | + |
| 17130 | 1443783_x_at | Region | H2-Aa             | 14960  | 17 | 31984134  | 31989153  | - |
| 17131 | 1451911_a_at | Region | Ace               | 11421  | 11 | 105789071 | 105810342 | + |
| 17132 | 1431707_a_at | Region | Pscd3             | 19159  | 5  | 142683118 | 142770834 | + |
| 17133 | 1425581_s_at | Region | Galnt7            | 108150 | 8  | 56563802  | 56692236  | - |
| 17134 | 1423635_at   | Region | Bmp2              | 12156  | 2  | 133066861 | 133075568 | + |
| 17135 | 1433440_x_at | Region | Uble1b            | 50995  | 7  | 29294488  | 29322320  | - |
| 17136 | 1439403_x_at | Region | Rnf12             | 19820  | X  | 98558532  | 98582649  | - |
| 17137 | 1421155_at   | Region | B3galt6           | 117592 | 4  | 154482891 | 154485011 | - |
| 17138 | 1428482_at   | Region | Akap10            | 56697  | 11 | 61596949  | 61655868  | - |
| 17139 | 1451914_a_at | Region | Add2              | 11519  | 6  | 86507734  | 86549220  | + |
| 17140 | 1415843_at   | Region | MGI:1929514       | 56716  | 17 | 22277138  | 22282663  | - |
| 17141 | 1423370_a_at | Region | Csnk1g2           | 103236 | 10 | 80753732  | 80771635  | + |
| 17142 | 1425019_at   | Region | Ubx4              | 217379 | 12 | 4054763   | 4083224   | - |
| 17143 | 1442504_at   | Region | D18Ert653e        | 52662  | 18 | 68295003  | 68486335  | + |
| 17144 | 1426480_at   | Region | Sbds              | 66711  | 5  | 129417562 | 129427294 | - |
| 17145 | 1428534_at   | Region | 2310073E15Rik     | 75692  | 8  | 69284310  | 69286724  | + |
| 17146 | 1431292_a_at | Region | Ptk9l             | 23999  | 9  | 106196703 | 106208982 | + |
| 17147 | 1434204_x_at | Region | Shmt2             | 108037 | 10 | 127253776 | 127259072 | - |
| 17148 | 1447649_x_at | Region | Dnajc1            | 13418  | 2  | 18259145  | 18434517  | - |
| 17149 | 1421009_at   | Region | Rsad2             | 58185  | 12 | 22988909  | 23002166  | - |
| 17150 | 1460610_at   | Region | 9430057O19Rik     | 231093 | 5  | 29347796  | 29355631  | + |
| 17151 | 1419805_s_at | Region | Ggps1             | 14593  | 13 | 13494995  | 13505951  | - |
| 17152 | 1460049_s_at | Region | 1500015O10Rik     | 78896  | 1  | 44025389  | 44037264  | + |
| 17153 | 1418341_at   | Region | Rab4a             | 19341  | 8  | 123093097 | 123122359 | + |
| 17154 | 1428193_at   | Region | Usp9x             | 22284  | X  | 11310477  | 11410726  | + |
| 17155 | 1438084_at   | Region | Adam23            | 23792  | 1  | 63739150  | 63885988  | + |
| 17156 | 1420987_at   | Region | Kif3b             | 16569  | 2  | 152748365 | 152789150 | + |
| 17157 | 1427471_at   | Region | Fbxl3             | 50789  | 14 | 97626484  | 97644968  | - |
| 17158 | 1455178_at   | Region | Rutbc1            | 97761  | 11 | 74574922  | 74622729  | - |
| 17159 | 1435789_x_at | Region | Rims2             | 116838 | 15 | 39098033  | 39582362  | + |
| 17160 | 1418681_at   | Region | Glt28d1           | 67574  | X  | 137758067 | 137765234 | + |
| 17161 | 1438012_at   | Region | Ppm1l             | 242083 | 3  | 68987383  | 69225607  | + |

|       |              |        |               |        |      |           |           |      |
|-------|--------------|--------|---------------|--------|------|-----------|-----------|------|
| 17162 | 1431755_a_at | Region | 1300013D05Rik | 67480  | 11   | 97566702  | 97587643  | -    |
| 17163 | 1443593_at   | Region | C330012H03Rik | 319765 | 16   | 20832300  | 20935863  | -    |
| 17164 | 1447576_at   | Region | 2010001K21Rik | 69829  | 13   | 46608975  | 46609341  | +    |
| 17165 | 1456787_at   | Region | D130020G16Rik | 320972 | 16   | 76627648  | 76628158  | +    |
| 17166 | 1416371_at   | Region | Apod          | 11815  | 16   | 30106394  | 30123724  | -    |
| 17167 | 1422684_a_at | Region | None          | None   | 6    | 33334773  | 34064398  | +    |
| 17168 | 1449374_at   | Region | Pipox         | 19193  | 11   | 77606274  | 77619443  | -    |
| 17169 | 1443491_at   | Region | Ptprk         | 19272  | 10   | 28105024  | 28627423  | +    |
| 17170 | 1427913_at   | Region | Rwdd1         | 66521  | 10   | 34056530  | 34079596  | -    |
| 17171 | 1421157_at   | Region | Fzd3          | 14365  | 14   | 59729279  | 59780310  | -    |
| 17172 | 1458588_at   | Region | None          | None   | 3    | 68221154  | 68221467  | +    |
| 17173 | 1431614_at   | Region | 2810049E08Rik | 72677  | NONE | NONE      | NONE      | NONE |
| 17174 | 1418924_at   | Region | 2400009B11Rik | 66985  | 7    | 135617908 | 135620645 | +    |
| 17175 | 1421954_at   | Region | Crkl          | 12929  | 16   | 16222955  | 16257223  | +    |
| 17176 | 1432547_at   | Region | C030005H24Rik | 78537  | 13   | 43266875  | 43267412  | +    |
| 17177 | 1452375_at   | Region | Aldh4a1       | 212647 | 4    | 138504271 | 138530948 | +    |
| 17178 | 1429292_a_at | Region | 2310046K01Rik | 69698  | 2    | 151460988 | 151466192 | +    |
| 17179 | 1416748_a_at | Region | Mre11a        | 17535  | 9    | 14618147  | 14667859  | +    |
| 17180 | 1448667_x_at | Region | Tob2          | 57259  | 15   | 81899631  | 81902862  | -    |
| 17181 | 1452148_at   | Region | Lrpap1        | 16976  | 5    | 33580650  | 33593377  | -    |
| 17182 | 1449237_at   | Region | Aloxe3        | 23801  | 11   | 68852035  | 68874772  | +    |
| 17183 | 1427150_at   | Region | MIl3          | 231051 | 5    | 23741347  | 23769624  | -    |
| 17184 | 1443744_at   | Region | C030036D22Rik | 77607  | 18   | 72562172  | 72562505  | -    |
| 17185 | 1425528_at   | Region | Prrx1         | 18933  | 1    | 163163407 | 163227993 | -    |
| 17186 | 1442620_at   | Region | D430018P08    | 234353 | 8    | 66818806  | 66920716  | -    |
| 17187 | 1438660_at   | Region | Gcnt2         | 14538  | 13   | 40420765  | 40521482  | +    |
| 17188 | 1448695_at   | Region | Prkci         | 18759  | 3    | 30407337  | 30464163  | +    |
| 17189 | 1427896_at   | Region | 2400003N08Rik | 71954  | 5    | 116220464 | 116244713 | -    |
| 17190 | 1451182_s_at | Region | C730048E16Rik | 223690 | 15   | 79104380  | 79114145  | -    |
| 17191 | 1441479_at   | Region | Ppm1b         | 19043  | 17   | 82787863  | 82846969  | +    |
| 17192 | 1455246_at   | Region | None          | None   | 9    | 110278696 | 110279940 | +    |
| 17193 | 1426694_at   | Region | 9030624J02Rik | 71517  | 7    | 112616598 | 112717342 | +    |
| 17194 | 1460396_at   | Region | Ddx54         | 71990  | 5    | 119764937 | 119780399 | +    |
| 17195 | 1444445_at   | Region | C77648        | 97695  | NONE | NONE      | NONE      | NONE |
| 17196 | 1426578_s_at | Region | Snapap        | 20615  | 3    | 90298452  | 90301491  | -    |
| 17197 | 1436847_s_at | Region | Cdca8         | 52276  | 4    | 123945578 | 123964016 | -    |
| 17198 | 1435684_at   | Region | Abcc5         | 27416  | 16   | 19102921  | 19197967  | -    |
| 17199 | 1434646_s_at | Region | Sap18         | 20220  | 14   | 52333126  | 52339849  | +    |
| 17200 | 1452868_at   | Region | Usp24         | 329908 | 4    | 105320122 | 105400231 | +    |
| 17201 | 1441787_at   | Region | C230027N18Rik | 330940 | 9    | 52183805  | 52184071  | -    |
| 17202 | 1444108_at   | Region | None          | None   | 4    | 58968543  | 58969021  | +    |
| 17203 | 1435369_at   | Region | C78212        | 380601 | 2    | 130127699 | 130175724 | -    |
| 17204 | 1450341_at   | Region | Pcdhb8        | 93879  | 18   | 37578993  | 37581332  | +    |
| 17205 | 1428704_at   | Region | Zfp661        | 72180  | 2    | 127089379 | 127098521 | -    |
| 17206 | 1424820_a_at | Region | Ndfip1        | 65113  | 18   | 38640514  | 38688909  | +    |
| 17207 | 1417543_at   | Region | Rps6ka2       | 20112  | 17   | 6670716   | 6803866   | +    |
| 17208 | 1459229_at   | Region | None          | None   | 10   | 32625765  | 32626466  | -    |
| 17209 | 1436058_at   | Region | Rsad2         | 58185  | 12   | 22988909  | 23002166  | -    |
| 17210 | 1422778_at   | Region | Taf9          | 108143 | 13   | 96808152  | 96810020  | +    |
| 17211 | 1459443_at   | Region | Kcnq1         | 16535  | 7    | 137520467 | 137840061 | +    |
| 17212 | 1441114_at   | Region | 9330156P08Rik | 320141 | 1    | 180081784 | 180082898 | +    |
| 17213 | 1439280_at   | Region | B230396O12Rik | 242800 | 4    | 153348589 | 153359487 | +    |
| 17214 | 1423284_at   | Region | Mansc1        | 67729  | 6    | 135366678 | 135389956 | -    |
| 17215 | 1416931_at   | Region | Nif3l1        | 65102  | 1    | 58752501  | 58767146  | +    |
| 17216 | 1435669_at   | Region | Zfp532        | 328977 | 18   | 65813456  | 65922159  | +    |
| 17217 | 1451352_s_at | Region | Mta3          | 116871 | 17   | 81539641  | 81648553  | +    |
| 17218 | 1458119_at   | Region | Slc25a27      | 74011  | 17   | 41143342  | 41168531  | -    |
| 17219 | 1434658_at   | Region | 3110056O03Rik | 73218  | 10   | 80987323  | 81000771  | +    |
| 17220 | 1452978_at   | Region | 2900055D14Rik | 72982  | 19   | 9767378   | 9773594   | -    |
| 17221 | 1416194_at   | Region | Cyp4b1        | 13120  | 4    | 114583633 | 114606610 | -    |
| 17222 | 1443352_at   | Region | C77614        | 30873  | 14   | 37126594  | 37127165  | -    |
| 17223 | 1421224_a_at | Region | Tcf2          | 21410  | 11   | 83579041  | 83633339  | +    |
| 17224 | 1449653_at   | Region | None          | None   | 2    | 52067092  | 52067578  | +    |
| 17225 | 1440379_at   | Region | Slc1a5        | 20514  | 7    | 13733002  | 13749749  | +    |
| 17226 | 1429087_at   | Region | 1110054O05Rik | 66209  | 4    | 59717529  | 59727289  | -    |



|       |              |        |                   |        |    |           |           |   |
|-------|--------------|--------|-------------------|--------|----|-----------|-----------|---|
| 17227 | 1436394_at   | Region | Trim37            | 68729  | 11 | 86855069  | 86948674  | + |
| 17228 | 1456003_a_at | Region | Slc1a4            | 55963  | 11 | 20196998  | 20227464  | - |
| 17229 | 1418247_s_at | Region | Rbm9              | 93686  | 15 | 77134294  | 77358885  | - |
| 17230 | 1436666_at   | Region | Flot2             | 14252  | 11 | 77765963  | 77786091  | + |
| 17231 | 1430075_at   | Region | Sf3b3             | 101943 | 8  | 110108214 | 110144495 | - |
| 17232 | 1418088_a_at | Region | Stx8              | 55943  | 11 | 67692133  | 67932806  | + |
| 17233 | 1453936_at   | Region | None              | None   | 17 | 31916915  | 31920078  | - |
| 17234 | 1452379_at   | Region | Auts2             | 319974 | 5  | 130627794 | 130728707 | - |
| 17235 | 1426720_at   | Region | Apbb2             | 11787  | 5  | 65067237  | 65384014  | - |
| 17236 | 1439925_at   | Region | None              | None   | 3  | 56918591  | 56918943  | - |
| 17237 | 1438247_at   | Region | Klhl15            | 236904 | X  | 88895662  | 88914725  | + |
| 17238 | 1456916_at   | Region | Nsd1              | 18193  | 13 | 53879224  | 53879921  | + |
| 17239 | 1422762_at   | Region | Kif17             | 16559  | 4  | 137143512 | 137182753 | + |
| 17240 | 1451646_at   | Region | Pdik1l            | 230809 | 4  | 133235901 | 133248731 | - |
| 17241 | 1424213_at   | Region | 1200002M06Rik     | 71707  | 4  | 146926859 | 146937113 | - |
| 17242 | 1429025_a_at | Region | Hexim2            | 71059  | 11 | 102954403 | 102960965 | + |
| 17243 | 1457486_at   | Region | None              | None   | 9  | 43187994  | 43188540  | - |
| 17244 | 1429523_a_at | Region | Slc39a5           | 72002  | 10 | 128132753 | 128137336 | - |
| 17245 | 1451004_at   | Region | Acvr2a            | 11480  | 2  | 48746319  | 48834325  | + |
| 17246 | 1434392_at   | Region | Usp34             | 17847  | 11 | 23201764  | 23383978  | + |
| 17247 | 1426933_at   | Region | Oxsr1             | 108737 | 9  | 119232699 | 119316671 | - |
| 17248 | 1443237_at   | Region | None              | None   | 4  | 76915066  | 76915728  | - |
| 17249 | 1421324_a_at | Region | Akt2              | 11652  | 7  | 22980718  | 23014488  | + |
| 17250 | 1436763_a_at | Region | Klf9              | 16601  | 19 | 22379147  | 22404832  | + |
| 17251 | 1448455_at   | Region | Cln8              | 26889  | 8  | 14267371  | 14278844  | + |
| 17252 | 1425937_a_at | Region | Hexim1            | 192231 | 11 | 102937414 | 102940814 | + |
| 17253 | 1417599_at   | Region | Cd276             | 102657 | 9  | 58638375  | 58656877  | - |
| 17254 | 1429114_at   | Region | Sestd1            | 228071 | 2  | 76884304  | 76942838  | - |
| 17255 | 1448310_at   | Region | Ick               | 56542  | 9  | 78282435  | 78336986  | + |
| 17256 | 1450758_at   | Region | Cntnap2           | 66797  | 6  | 45854973  | 47502306  | + |
| 17257 | 1457723_at   | Region | Pspc1             | 66645  | 14 | 51244701  | 51300567  | - |
| 17258 | 1429674_at   | Region | 1700113H08Rik     | 76640  | 10 | 87194215  | 87205104  | + |
| 17259 | 1448374_at   | Region | Med28             | 66999  | 5  | 44279069  | 44284371  | + |
| 17260 | 1437729_at   | Region | None              | None   | 3  | 15039734  | 15040196  | - |
| 17261 | 1438263_at   | Region | 9430020K01Rik     | 240185 | 18 | 4653875   | 4685495   | + |
| 17262 | 1446983_at   | Region | Hrpt2             | 214498 | 1  | 143439562 | 143534747 | - |
| 17263 | 1452430_s_at | Region | Sfrs1             | 110809 | 11 | 87775771  | 87779641  | + |
| 17264 | 1428376_at   | Region | 4932415G12Rik     | 67723  | 10 | 94647892  | 94662897  | - |
| 17265 | 1433616_a_at | Region | 2310028O11Rik     | 433771 | 4  | 137984815 | 138012312 | - |
| 17266 | 1422978_at   | Region | Cybb              | 13058  | X  | 7675646   | 7708207   | - |
| 17267 | 1435953_at   | Region | Btaf1             | 107182 | 19 | 36299109  | 36355422  | + |
| 17268 | 1450425_a_at | Region | 2700062C07Rik     | 68046  | 18 | 24699366  | 24706263  | + |
| 17269 | 1450586_at   | Region | Bdkrb1            | 12061  | 12 | 101051651 | 101052655 | + |
| 17270 | 1441397_at   | Region | Pard3             | 93742  | 8  | 126354044 | 126919239 | + |
| 17271 | 1435030_at   | Region | Upf2              | 326622 | 2  | 5868739   | 5973970   | + |
| 17272 | 1451300_a_at | Region | Chmp7             | 105513 | 14 | 64032927  | 64048462  | - |
| 17273 | 1446484_at   | Region | Mef2c             | 17260  | 13 | 79604158  | 79763912  | + |
| 17274 | 1428317_at   | Region | None              | None   | X  | 70047755  | 70057514  | + |
| 17275 | 1426572_at   | Region | Me2               | 107029 | 18 | 74004269  | 74049621  | - |
| 17276 | 1423168_at   | Region | Prei3             | 19070  | 1  | 55432452  | 55455260  | + |
| 17277 | 1433439_at   | Region | Cpne1             | 266692 | 2  | 155528782 | 155568901 | - |
| 17278 | 1428755_at   | Region | 3526402H21Rik     | 66683  | 1  | 64893251  | 64897055  | + |
| 17279 | 1426521_at   | Region | Lin10             | 234678 | 8  | 104520933 | 104548681 | + |
| 17280 | 1444258_at   | Region | Actn4             | 60595  | 7  | 24299701  | 24368752  | - |
| 17281 | 1429241_at   | Region | 9130020G22Rik     | 74552  | 4  | 134332771 | 134375796 | - |
| 17282 | 1458932_at   | Region | Pex2              | 58869  | 3  | 32358790  | 32491207  | - |
| 17283 | 1448494_at   | Region | Gas1              | 14451  | 13 | 58831933  | 58834893  | - |
| 17284 | 1424357_at   | Region | Tmem45b           | 235135 | 9  | 31348544  | 31386599  | - |
| 17285 | 1438736_at   | Region | 6330441O12Rik     | 331401 | X  | 36316177  | 36444623  | - |
| 17286 | 1458099_at   | Region | None              | None   | 12 | 37769208  | 37769889  | + |
| 17287 | 1432676_at   | Region | None              | None   | 19 | 45699731  | 45701598  | + |
| 17288 | 1441865_at   | Region | None              | None   | 7  | 85102845  | 85103077  | + |
|       |              |        | 0610007P22Rik /// |        |    |           |           |   |
| 17289 | 1431132_x_at | Region | LOC546103         | 546103 | 8  | 111533219 | 111551012 | - |
| 17290 | 1437120_at   | Region | 4732481H14Rik     | 209131 | 4  | 59749298  | 59843221  | + |

|       |              |        |                     |        |      |           |           |      |
|-------|--------------|--------|---------------------|--------|------|-----------|-----------|------|
| 17291 | 1426023_a_at | Region | Rabep1              | 54189  | 11   | 70570583  | 70666598  | +    |
| 17292 | 1439438_a_at | Region | 1110005A23Rik       | 66118  | 10   | 128559009 | 128614707 | +    |
| 17293 | 1443741_x_at | Region | Whsc1               | 107823 | 5    | 32383490  | 32383756  | +    |
| 17294 | 1426315_a_at | Region | 6330416G13Rik       | 230279 | 4    | 62651547  | 62677546  | +    |
| 17295 | 1427316_s_at | Region | AA881470            | 231841 | 5    | 139703855 | 139718166 | +    |
| 17296 | 1430378_at   | Region | 2900011G08Rik       | 72933  | 14   | 72166170  | 72167530  | -    |
| 17297 | 1457926_at   | Region | None                | None   | NONE | NONE      | NONE      | NONE |
| 17298 | 1430057_s_at | Region | 2810002D13Rik       | 66606  | 2    | 120118087 | 120123123 | -    |
| 17299 | 1457339_at   | Region | Ccm2                | 216527 | 11   | 6441744   | 6491532   | +    |
| 17300 | 1428457_at   | Region | 5830472M02Rik       | 76080  | 2    | 163059320 | 163074164 | +    |
| 17301 | 1454707_at   | Region | 2310035C23Rik       | 227446 | 1    | 105555177 | 105695178 | +    |
| 17302 | 1449997_at   | Region | Tpm3                | 59069  | 3    | 89883112  | 89911022  | +    |
| 17303 | 1427200_at   | Region | Zranb1              | 360216 | 7    | 127315953 | 127350282 | +    |
| 17304 | 1459196_at   | Region | Dnmbp               | 71972  | 19   | 43392373  | 43456795  | -    |
| 17305 | 1417551_at   | Region | Cln3                | 12752  | 7    | 120621131 | 120632951 | -    |
| 17306 | 1455291_s_at | Region | Znrf2               | 387524 | 6    | 54961241  | 55034061  | +    |
| 17307 | 1443669_at   | Region | Zfyve28             | 231125 | 5    | 32700148  | 32700580  | -    |
| 17308 | 1455104_at   | Region | Mad                 | 17119  | 6    | 87085070  | 87103255  | -    |
| 17309 | 1416795_at   | Region | Cryl1               | 68631  | 14   | 51806438  | 51929961  | -    |
| 17310 | 1455545_at   | Region | 1110065P20Rik       | 68920  | 4    | 123876604 | 123877771 | -    |
| 17311 | 1443979_at   | Region | A830021K08Rik       | 320427 | 14   | 113261116 | 113262926 | +    |
|       |              |        | Pira1 /// Pira2 /// |        |      |           |           |      |
|       |              |        | Pira3 /// Pira4 /// |        |      |           |           |      |
|       |              |        | Pira6 /// Pirb ///  |        |      |           |           |      |
| 17312 | 1420464_s_at | Region | LOC546027           | 18722  | 7    | 5565      | 13810     | -    |
| 17313 | 1445336_at   | Region | None                | None   | NONE | NONE      | NONE      | NONE |
| 17314 | 1436969_at   | Region | 1700013E18Rik       | 71845  | 3    | 153718138 | 153756017 | +    |
| 17315 | 1432065_at   | Region | 3100003L13Rik       | 73099  | 8    | 114290214 | 114291684 | +    |
| 17316 | 1442165_at   | Region | 4930438O05Rik       | 78795  | 1    | 85961103  | 86084595  | +    |
| 17317 | 1433516_a_at | Region | 1110002M09Rik       | 66915  | 1    | 92464637  | 92469415  | -    |
| 17318 | 1418875_at   | Region | Syngr4              | 58867  | 7    | 39974135  | 39981975  | -    |
| 17319 | 1447544_at   | Region | 1700020L24Rik       | 66330  | 11   | 83165685  | 83169205  | +    |
| 17320 | 1455091_at   | Region | 3222402P14Rik       | 235542 | 9    | 101055227 | 101161626 | -    |
| 17321 | 1430705_at   | Region | 2810454F19Rik       | 72802  | 15   | 76128535  | 76129555  | -    |
| 17322 | 1436572_at   | Region | 4732496G21Rik       | 320162 | 11   | 106610364 | 106639918 | +    |
| 17323 | 1442005_at   | Region | AW987390            | 100467 | 4    | 148467320 | 148468165 | -    |
| 17324 | 1456027_at   | Region | BB131279            | 103061 | X    | 133486477 | 133488005 | -    |
| 17325 | 1434488_at   | Region | Arfrp1              | 76688  | 2    | 181074790 | 181082318 | -    |
| 17326 | 1423139_at   | Region | Wdr4                | 57773  | 17   | 29304618  | 29321311  | -    |
| 17327 | 1451938_a_at | Region | Sntb1               | 20649  | 15   | 55643660  | 55798909  | -    |
| 17328 | 1438709_at   | Region | D11Ertd498e         | 52639  | 11   | 109394610 | 109432478 | -    |
| 17329 | 1427795_s_at | Region | None                | None   | NONE | NONE      | NONE      | NONE |
| 17330 | 1460017_at   | Region | LOC434179           | 434179 | 7    | 36842546  | 36875156  | -    |
| 17331 | 1459991_at   | Region | Myo9a               | 270163 | 9    | 59868073  | 60046149  | +    |
| 17332 | 1452974_at   | Region | Nol8                | 70930  | 13   | 49249941  | 49275842  | +    |
| 17333 | 1435679_at   | Region | Optn                | 71648  | 2    | 4937914   | 4981210   | -    |
| 17334 | 1454588_at   | Region | 9430006E15Rik       | 77247  | 9    | 20558366  | 20559139  | -    |
| 17335 | 1429099_at   | Region | 1110051B16Rik       | 278672 | 14   | 24358464  | 24365306  | +    |
| 17336 | 1433272_at   | Region | A430110A21Rik       | 77788  | NONE | NONE      | NONE      | NONE |
| 17337 | 1455322_at   | Region | Ttc21b              | 73668  | 2    | 66040107  | 66112017  | -    |
| 17338 | 1423659_a_at | Region | Tbc1d17             | 233204 | 7    | 38915960  | 38924007  | -    |
| 17339 | 1421957_a_at | Region | Pcyt1a              | 13026  | 16   | 31261076  | 31281386  | +    |
| 17340 | 1439256_x_at | Region | Tm7sf1              | 83924  | 13   | 12777506  | 12812482  | -    |
| 17341 | 1425241_a_at | Region | Wsb1                | 78889  | 11   | 78965045  | 78980093  | -    |
| 17342 | 1425711_a_at | Region | Akt1                | 11651  | 12   | 108133208 | 108153577 | -    |
| 17343 | 1416143_at   | Region | Atp5j               | 11957  | 16   | 83935942  | 83943643  | -    |
| 17344 | 1435006_s_at | Region | Abcb7               | 11306  | X    | 98882022  | 99015261  | -    |
| 17345 | 1446163_at   | Region | None                | None   | 19   | 60063579  | 60064272  | -    |
| 17346 | 1452764_at   | Region | Socs6               | 54607  | 18   | 89012087  | 89038416  | -    |
| 17347 | 1425393_a_at | Region | Map2k7              | 26400  | 8    | 3593945   | 3601130   | +    |
| 17348 | 1428326_s_at | Region | Hrsp12              | 15473  | 15   | 34483848  | 34494901  | -    |
| 17349 | 1419675_at   | Region | Ngfb                | 18049  | 3    | 101897619 | 101948696 | +    |
| 17350 | 1429345_at   | Region | D2Ertd435e          | 51885  | 2    | 120685055 | 120710967 | +    |
| 17351 | 1459818_x_at | Region | Zfp261              | 56364  | X    | 96005746  | 96022210  | -    |
| 17352 | 1416548_at   | Region | Slc35b4             | 58246  | 6    | 34249834  | 34271009  | -    |

|       |              |        |               |        |      |           |           |      |
|-------|--------------|--------|---------------|--------|------|-----------|-----------|------|
| 17353 | 1423073_at   | Region | Cmpk          | 66588  | 4    | 113919543 | 113948234 | -    |
| 17354 | 1435213_at   | Region | Nhlrc1        | 105193 | 13   | 46610707  | 46612969  | -    |
| 17355 | 1418102_at   | Region | Hes1          | 15205  | 16   | 28870268  | 28872833  | +    |
| 17356 | 1425985_s_at | Region | Masp1         | 17174  | 16   | 22233196  | 22304246  | -    |
| 17357 | 1428485_at   | Region | Car12         | 76459  | 9    | 66838894  | 66891997  | +    |
| 17358 | 1460589_at   | Region | Zfp597        | 71063  | 16   | 3533092   | 3535419   | -    |
| 17359 | 1452372_at   | Region | Bsd1          | 100383 | 4    | 128488792 | 128515548 | +    |
| 17360 | 1427553_at   | Region | None          | None   | 17   | 49385144  | 49387422  | +    |
| 17361 | 1459879_at   | Region | BC031575      | 223989 | 16   | 12874640  | 12899363  | -    |
| 17362 | 1428214_at   | Region | Tom7          | 66169  | 5    | 22303551  | 22308004  | -    |
| 17363 | 1455000_at   | Region | Gpr68         | 238377 | 12   | 96322143  | 96333339  | -    |
| 17364 | 1457173_at   | Region | Ywhae         | 22627  | 11   | 75458597  | 75491496  | +    |
| 17365 | 1442914_at   | Region | None          | None   | 6    | 97618288  | 97618934  | -    |
| 17366 | 1442858_at   | Region | Phr1          | 105689 | 14   | 97658865  | 97891435  | -    |
| 17367 | 1443679_at   | Region | 2510003B16Rik | 76786  | 4    | 115082881 | 115096735 | +    |
| 17368 | 1441228_at   | Region | ---           | 381823 | 6    | 135739376 | 135741778 | +    |
| 17369 | 1456402_at   | Region | A330076H08Rik | 320026 | 7    | 55716635  | 55717327  | -    |
| 17370 | 1428312_at   | Region | 2810002D13Rik | 66606  | 2    | 120118087 | 120123123 | -    |
| 17371 | 1425907_s_at | Region | Amot          | 27494  | X    | 138889991 | 138927092 | -    |
| 17372 | 1448365_at   | Region | Exosc7        | 66446  | 9    | 123131019 | 123153902 | +    |
| 17373 | 1457779_at   | Region | 1110046J04Rik | 68808  | 13   | 33484935  | 33491803  | +    |
| 17374 | 1454638_a_at | Region | Pah           | 18478  | 10   | 87495513  | 87557284  | +    |
| 17375 | 1421486_at   | Region | Egr3          | 13655  | 14   | 64393373  | 64396085  | +    |
| 17376 | 1459800_s_at | Region | Map3k4        | 26407  | 17   | 10867071  | 10957848  | -    |
| 17377 | 1444140_at   | Region | Pum1          | 80912  | 4    | 129460274 | 129578157 | +    |
| 17378 | 1456358_at   | Region | Etv3          | 27049  | 3    | 87270684  | 87284681  | +    |
| 17379 | 1422698_s_at | Region | Jarid2        | 16468  | 13   | 44305547  | 44495137  | +    |
| 17380 | 1427342_at   | Region | 5330408N05Rik | 320720 | 2    | 69542220  | 69568006  | -    |
| 17381 | 1459030_at   | Region | None          | None   | NONE | NONE      | NONE      | NONE |
| 17382 | 1442663_at   | Region | None          | None   | 4    | 12031968  | 12032589  | +    |
| 17383 | 1418879_at   | Region | 9030611O19Rik | 104943 | 12   | 27650830  | 27656802  | +    |
| 17384 | 1422664_at   | Region | Rab10         | 19325  | 12   | 3108      | 12388     | -    |
| 17385 | 1451173_at   | Region | Lrrc49        | 102747 | 9    | 60704784  | 60805455  | -    |
| 17386 | 1427032_at   | Region | Herc4         | 67345  | 10   | 63208216  | 63282585  | +    |
| 17387 | 1458096_at   | Region | None          | None   | X    | 155564714 | 155565242 | -    |
| 17388 | 1443062_at   | Region | Auts2         | 319974 | 5    | 130627794 | 130728707 | -    |
| 17389 | 1431769_at   | Region | 2210406O10Rik | 76710  | 5    | 34943818  | 34952559  | -    |
| 17390 | 1455728_at   | Region | Pten          | 19211  | 19   | 32083643  | 32146174  | +    |
| 17391 | 1438444_at   | Region | A230091H23    | 328971 | 18   | 62777723  | 62889947  | +    |
| 17392 | 1459240_at   | Region | D8Erttd325e   | 66855  | 8    | 122748919 | 122778703 | +    |
| 17393 | 1459948_at   | Region | Ghr           | 14600  | 15   | 3098508   | 3365766   | -    |
| 17394 | 1443422_at   | Region | 2410089E03Rik | 73692  | 15   | 7956639   | 8058734   | +    |
| 17395 | 1452118_at   | Region | 2600005C20Rik | 72462  | 17   | 29844491  | 29868935  | +    |
| 17396 | 1440197_at   | Region | BC032203      | 210982 | 17   | 44309813  | 44343803  | -    |
| 17397 | 1432255_at   | Region | Mast1         | 56527  | 8    | 84179304  | 84205636  | -    |
| 17398 | 1438010_at   | Region | D4Erttd429e   | 230917 | 4    | 148217245 | 148230336 | -    |
| 17399 | 1453156_s_at | Region | Zadh1         | 77219  | 12   | 81153770  | 81182471  | +    |
| 17400 | 1443434_s_at | Region | Plxnc1        | 54712  | 10   | 94767461  | 94918749  | -    |
| 17401 | 1435181_at   | Region | AI461788      | 231506 | 5    | 99460839  | 99519278  | -    |
| 17402 | 1458377_at   | Region | Crsp7         | 70625  | 8    | 71645137  | 71698918  | -    |
| 17403 | 1431892_a_at | Region | Plcd3         | 72469  | 11   | 102891399 | 102922691 | -    |
| 17404 | 1423711_at   | Region | Ndufa1        | 69702  | 2    | 119169300 | 119176647 | -    |
| 17405 | 1423245_at   | Region | Cops7a        | 26894  | 6    | 125614820 | 125621370 | -    |
| 17406 | 1456415_at   | Region | Zfp451        | 98403  | 1    | 34030702  | 34083136  | -    |
| 17407 | 1460348_at   | Region | Mad2l2        | 71890  | 4    | 146632852 | 146638058 | +    |
| 17408 | 1444196_at   | Region | AI662501      | 103817 | 11   | 59570266  | 59570909  | -    |
| 17409 | 1425993_a_at | Region | Hsp105        | 15505  | 5    | 148555092 | 148574465 | -    |
| 17410 | 1443533_at   | Region | Ppp2r5e       | 26932  | 12   | 72307243  | 72452562  | -    |
| 17411 | 1445701_at   | Region | None          | None   | 1    | 133563717 | 133563946 | -    |
| 17412 | 1443670_at   | Region | 2010001J22Rik | 70113  | 15   | 89430323  | 89430747  | -    |
| 17413 | 1427992_a_at | Region | Rab12         | 19328  | 17   | 64262451  | 64265612  | -    |
| 17414 | 1430028_at   | Region | 2210018M11Rik | 233545 | 7    | 92710530  | 92747815  | -    |
| 17415 | 1434024_at   | Region | Nphp4         | 260305 | 4    | 150970504 | 151055496 | +    |
| 17416 | 1434460_at   | Region | Bbs4          | 102774 | 9    | 59438725  | 59470219  | -    |
| 17417 | 1440934_at   | Region | 6230409E13Rik | 76132  | 4    | 22000704  | 22020260  | +    |

|       |              |        |               |        |      |           |           |      |
|-------|--------------|--------|---------------|--------|------|-----------|-----------|------|
| 17418 | 1446906_at   | Region | C81615        | 97548  | NONE | NONE      | NONE      | NONE |
| 17419 | 1426377_at   | Region | Zfp281        | 226442 | 1    | 136473723 | 136477067 | +    |
| 17420 | 1456557_at   | Region | 1700041C02Rik | 73332  | 4    | 118281798 | 118374408 | -    |
| 17421 | 1449628_s_at | Region | Stard7        | 99138  | 2    | 126784092 | 126812786 | +    |
| 17422 | 1416016_at   | Region | Tap1          | 21354  | 17   | 31893511  | 31902354  | +    |
| 17423 | 1437462_x_at | Region | Mmp15         | 17388  | 8    | 94636817  | 94655679  | +    |
| 17424 | 1426833_at   | Region | Eif4g3        | 230861 | 4    | 136874731 | 137087744 | +    |
| 17425 | 1451596_a_at | Region | Sphk1         | 20698  | 11   | 116354440 | 116357763 | +    |
| 17426 | 1438952_x_at | Region | None          | None   | 6    | 47633471  | 47633699  | -    |
| 17427 | 1435416_x_at | Region | Pigq          | 14755  | 17   | 3046      | 4385      | -    |
| 17428 | 1425845_a_at | Region | Shoc2         | 56392  | 19   | 53523183  | 53611744  | +    |
| 17429 | 1428026_at   | Region | None          | None   | 2    | 169394568 | 169421827 | +    |
| 17430 | 1460429_at   | Region | Cdc5l         | 71702  | 17   | 42903188  | 42944108  | -    |
| 17431 | 1425305_at   | Region | Zfp295        | 114565 | 16   | 140871    | 154115    | +    |
| 17432 | 1446649_at   | Region | Centd1        | 212285 | 5    | 61409120  | 61555599  | -    |
| 17433 | 1415999_at   | Region | Hey1          | 15213  | 3    | 8650290   | 8653917   | -    |
| 17434 | 1443539_at   | Region | None          | None   | 3    | 87363320  | 87363857  | -    |
| 17435 | 1429420_at   | Region | 4931414P19Rik | 74359  | 14   | 49099522  | 49167302  | -    |
| 17436 | 1426253_at   | Region | 4933428G09Rik | 66768  | 5    | 47136215  | 47152579  | +    |
| 17437 | 1425495_at   | Region | Zfp62         | 22720  | 11   | 48957160  | 48970604  | +    |
| 17438 | 1450095_a_at | Region | Acyp1         | 66204  | 12   | 82141604  | 82149527  | -    |
| 17439 | 1443183_at   | Region | Huwe1         | 59026  | NONE | NONE      | NONE      | NONE |
| 17440 | 1419664_at   | Region | Srr           | 27364  | 11   | 74632454  | 74651361  | -    |
| 17441 | 1418421_at   | Region | Bcl6b         | 12029  | 11   | 69949786  | 69955379  | -    |
| 17442 | 1429536_at   | Region | 2310040C09Rik | 69640  | 11   | 61410106  | 61433797  | +    |
| 17443 | 1424016_at   | Region | 2310007F21Rik | 66939  | 9    | 63723018  | 63762391  | +    |
| 17444 | 1426523_a_at | Region | Gnpda2        | 67980  | 5    | 68341941  | 68359622  | -    |
| 17445 | 1420812_at   | Region | Hdac7a        | 56233  | 15   | 97868326  | 97887406  | -    |
| 17446 | 1416751_a_at | Region | Ddx20         | 53975  | 3    | 105474108 | 105483403 | -    |
| 17447 | 1429119_at   | Region | 4833421E05Rik | 67732  | 12   | 18821943  | 18829156  | -    |
| 17448 | 1420413_at   | Region | Slc7a11       | 26570  | 3    | 49959006  | 50031625  | -    |
| 17449 | 1438636_s_at | Region | None          | None   | 9    | 114157277 | 114157569 | +    |
| 17450 | 1459791_at   | Region | Dnajc1        | 13418  | 2    | 18259145  | 18434517  | +    |
| 17451 | 1444230_at   | Region | 2900046D03Rik | 402731 | 7    | 120849466 | 120849638 | +    |
| 17452 | 1426533_at   | Region | Nol5a         | 67134  | 2    | 129788312 | 129793166 | +    |
| 17453 | 1447165_at   | Region | None          | None   | 17   | 63707361  | 63707841  | -    |
| 17454 | 1440530_at   | Region | AU019752      | 101756 | 7    | 4267037   | 4267674   | +    |
| 17455 | 1444072_at   | Region | 2610528H13Rik | 67179  | 14   | 60364796  | 60394022  | +    |
| 17456 | 1445664_at   | Region | A330103N21Rik | 77773  | 7    | 62004449  | 62004857  | +    |
| 17457 | 1448587_at   | Region | Tbc1d10a      | 103724 | 11   | 4081620   | 4110292   | +    |
| 17458 | 1417206_at   | Region | Urod          | 22275  | 4    | 115949123 | 115953269 | -    |
| 17459 | 1453319_at   | Region | Ccar1         | 67500  | 10   | 62710847  | 62758641  | -    |
| 17460 | 1417033_at   | Region | Ube2g2        | 22213  | 10   | 77733757  | 77757426  | +    |
| 17461 | 1438750_at   | Region | Atrx          | 22589  | X    | 100401518 | 100530707 | -    |
| 17462 | 1427677_a_at | Region | Sox6          | 20679  | 7    | 109336962 | 109662307 | -    |
| 17463 | 1439223_at   | Region | Tmod2         | 50876  | 9    | 75710299  | 75748747  | -    |
| 17464 | 1448771_a_at | Region | Fth1          | 14319  | 19   | 9179200   | 9181589   | +    |
| 17465 | 1435442_at   | Region | Wdsof1        | 223499 | 15   | 39012633  | 39046557  | +    |
| 17466 | 1451501_a_at | Region | Ghr           | 14600  | 15   | 3098508   | 3365766   | -    |
| 17467 | 1439094_at   | Region | Cltc          | 67300  | 11   | 86422645  | 86485484  | -    |
| 17468 | 1460500_at   | Region | 5033421C21Rik | 75963  | 14   | 3569655   | 4235927   | +    |
| 17469 | 1447982_at   | Region | 1110008P14Rik | 73737  | 2    | 32311270  | 32314046  | -    |
| 17470 | 1417998_at   | Region | Ptges3        | 56351  | 10   | 127795692 | 127813964 | +    |
| 17471 | 1426367_at   | Region | Cab39l        | 69008  | 14   | 53976044  | 54083966  | +    |
| 17472 | 1419968_at   | Region | C77370        | 245555 | X    | 98684555  | 98802550  | -    |
| 17473 | 1418380_at   | Region | Terf1         | 21749  | 1    | 15983322  | 16021093  | +    |
| 17474 | 1429434_at   | Region | Pik3ca        | 18706  | 3    | 31844384  | 31871009  | +    |
| 17475 | 1445213_at   | Region | Cyld          | 74256  | 8    | 87990637  | 88033868  | +    |
| 17476 | 1454997_at   | Region | Msrb3         | 320183 | 10   | 120367469 | 120482385 | -    |
| 17477 | 1447915_x_at | Region | BC054438      | 407831 | 17   | 22863553  | 22886965  | -    |
| 17478 | 1448105_at   | Region | Prm2          | 19119  | 16   | 7040255   | 7040971   | -    |
| 17479 | 1455411_at   | Region | None          | None   | 7    | 91771241  | 91772267  | -    |
| 17480 | 1435517_x_at | Region | Ralb          | 64143  | 1    | 119221743 | 119256062 | -    |
| 17481 | 1435951_at   | Region | Grip1         | 74053  | 10   | 119395694 | 119653294 | +    |
| 17482 | 1454156_at   | Region | A230104H11Rik | 77759  | 1    | 58079224  | 58105244  | +    |

|       |              |        |               |        |    |           |           |   |
|-------|--------------|--------|---------------|--------|----|-----------|-----------|---|
| 17483 | 1430036_at   | Region | 2310015B20Rik | 69563  | 10 | 70267391  | 70273858  | + |
| 17484 | 1436428_at   | Region | Chrn2         | 11444  | 3  | 89559631  | 89570768  | - |
| 17485 | 1423605_a_at | Region | Mdm2          | 17246  | 10 | 117379897 | 117401708 | - |
| 17486 | 1454695_at   | Region | Wdr18         | 216156 | 10 | 80091007  | 80092606  | + |
| 17487 | 1452133_at   | Region | Uqcrh         | 66576  | 4  | 115025870 | 115033953 | - |
| 17488 | 1426723_at   | Region | Wdr48         | 67561  | 9  | 119904848 | 119936532 | + |
| 17489 | 1447708_x_at | Region | Pde2a         | 207728 | 7  | 95527997  | 95619103  | + |
| 17490 | 1445437_at   | Region | 2310015A05Rik | 72315  | 16 | 16417438  | 16421706  | + |
| 17491 | 1441033_at   | Region | 8430438D04Rik | 278279 | 10 | 105080153 | 105466941 | - |
| 17492 | 1438869_at   | Region | 4930515G01Rik | 67642  | 5  | 113883363 | 113884609 | - |
| 17493 | 1456302_at   | Region | Pex6          | 224824 | 17 | 44222425  | 44236648  | + |
| 17494 | 1422777_at   | Region | C1ql1         | 23829  | 11 | 102760822 | 102767550 | - |
| 17495 | 1429084_at   | Region | Vezf1         | 22344  | 11 | 87796271  | 87812715  | + |
| 17496 | 1434802_s_at | Region | Ntf3          | 18205  | 6  | 126767210 | 126830735 | - |
| 17497 | 1450662_at   | Region | Tesk1         | 21754  | 4  | 43357861  | 43363983  | + |
| 17498 | 1440271_at   | Region | None          | None   | 3  | 96286466  | 96287414  | + |
|       |              |        | Hnrpa0 ///    |        |    |           |           |   |
| 17499 | 1428407_at   | Region | LOC544935     | 544935 | 13 | 56751138  | 56753586  | - |
| 17500 | 1452292_at   | Region | Ap2b1         | 71770  | 11 | 83030763  | 83131001  | + |
| 17501 | 1422265_at   | Region | Brs3          | 12209  | X  | 51797788  | 51803472  | + |
| 17502 | 1456958_at   | Region | C230072F16Rik | 320784 | 17 | 78730407  | 78731047  | + |
| 17503 | 1416681_at   | Region | Ube3a         | 22215  | 7  | 53507062  | 53583196  | + |
| 17504 | 1445443_at   | Region | None          | None   | 7  | 39515619  | 39516240  | + |
| 17505 | 1423410_at   | Region | Meig1         | 104362 | 2  | 3326314   | 3339919   | - |
| 17506 | 1450727_a_at | Region | Poldip2       | 67811  | 11 | 78237955  | 78248395  | + |
| 17507 | 1453320_at   | Region | 1700027A23Rik | 76420  | 3  | 105792499 | 105810475 | - |
| 17508 | 1427986_a_at | Region | Col16a1       | 107581 | 4  | 129075001 | 129126388 | + |
| 17509 | 1439011_at   | Region | None          | None   | 12 | 28978759  | 28979471  | - |
| 17510 | 1433188_at   | Region | B230112I24Rik | 77984  | 6  | 45275126  | 45276301  | + |
| 17511 | 1458664_at   | Region | A430103D13Rik | 77775  | 12 | 73200611  | 73200870  | - |
| 17512 | 1424447_at   | Region | 1700030K09Rik | 72254  | 8  | 71592026  | 71610746  | + |
| 17513 | 1432583_at   | Region | 2900042E19Rik | 72941  | 17 | 79271105  | 79272456  | - |
| 17514 | 1444239_at   | Region | BC023488      | 237221 | X  | 159769900 | 159789915 | + |
| 17515 | 1428626_at   | Region | Lysmd2        | 70082  | 9  | 75763320  | 75775350  | + |
| 17516 | 1445079_at   | Region | None          | None   | 15 | 86404486  | 86405109  | + |
| 17517 | 1416392_a_at | Region | Atp6v0c       | 11984  | 17 | 21967459  | 21973000  | - |
| 17518 | 1457887_at   | Region | Scospondin    | 243369 | 6  | 48581108  | 48634114  | + |
| 17519 | 1448499_a_at | Region | Ephx2         | 13850  | 14 | 60611797  | 60651920  | - |
| 17520 | 1436132_at   | Region | D430036N24Rik | 98949  | 2  | 156467410 | 156468077 | - |
| 17521 | 1452555_at   | Region | None          | None   | 6  | 65580099  | 65581148  | + |
| 17522 | 1417582_s_at | Region | Dhodh         | 56749  | 8  | 108891153 | 108906299 | - |
| 17523 | 1420619_a_at | Region | Aes           | 14797  | 10 | 81695504  | 81702143  | + |
| 17524 | 1437801_at   | Region | Lpp           | 210126 | 16 | 23179019  | 23766559  | + |
| 17525 | 1438254_at   | Region | 1110007A13Rik | 210711 | 7  | 122745901 | 122814730 | - |
| 17526 | 1433709_at   | Region | Cant1         | 76025  | 11 | 118231701 | 118240124 | - |
| 17527 | 1459996_at   | Region | Cacna1a       | 12286  | 8  | 83678856  | 83903623  | + |
| 17528 | 1452688_at   | Region | Prpf39        | 328110 | 12 | 61831742  | 61841076  | + |
| 17529 | 1415762_x_at | Region | Mrpl52        | 68836  | 14 | 48943738  | 48946676  | + |
| 17530 | 1456577_x_at | Region | Pitrm1        | 69617  | 13 | 6445093   | 6477254   | + |

BC003993 ///  
 LOC432468 ///  
 LOC432512 ///  
 LOC432823 ///  
 LOC432857 ///  
 LOC432890 ///  
 LOC432924 ///  
 LOC432932 ///  
 LOC433043 ///  
 LOC433244 ///  
 LOC433373 ///  
 LOC433596 ///  
 LOC433657 ///  
 LOC433893 ///  
 LOC433915 ///  
 LOC434014 ///  
 LOC434071 ///  
 LOC434166 ///

|       |              |        |               |        |    |           |           |   |
|-------|--------------|--------|---------------|--------|----|-----------|-----------|---|
| 17531 | 1424607_a_at | Region | LOC4          | 432468 | 10 | 66312437  | 66314332  | + |
| 17532 | 1439152_at   | Region | BC052066      | 234814 | 8  | 120453461 | 120463839 | - |
| 17533 | 1451480_at   | Region | E2f4          | 104394 | 8  | 104593291 | 104600998 | + |
| 17534 | 1452224_at   | Region | Morc3         | 338467 | 16 | 93003378  | 93047429  | + |
| 17535 | 1429629_at   | Region | Ezh1          | 14055  | 11 | 101012203 | 101049035 | - |
| 17536 | 1459911_at   | Region | D030068L24Rik | 237988 | 11 | 115203023 | 115215330 | + |
| 17537 | 1420174_s_at | Region | Tax1bp1       | 52440  | 6  | 52858073  | 52910809  | + |
| 17538 | 1427928_s_at | Region | Cdc911i       | 228812 | 2  | 154735189 | 154814361 | - |
| 17539 | 1451244_a_at | Region | Zfp422        | 67255  | 6  | 117061320 | 117066281 | - |
| 17540 | 1417918_at   | Region | Mrp11         | 66419  | 19 | 4751105   | 4753733   | + |
| 17541 | 1427056_at   | Region | Adams15       | 235130 | 9  | 30819450  | 30825116  | - |
| 17542 | 1437532_at   | Region | 2810055G22Rik | 108086 | 5  | 38        | 2110      | - |
| 17543 | 1434035_at   | Region | Dnajb6        | 23950  | 5  | 28186480  | 28217572  | + |
| 17544 | 1454236_a_at | Region | C030004A17Rik | 109229 | 9  | 35131009  | 35181307  | - |
| 17545 | 1451052_at   | Region | Cog8          | 97484  | 8  | 106338850 | 106354346 | - |
| 17546 | 1448643_at   | Region | Ssna1         | 68475  | 2  | 25197696  | 25204574  | - |
| 17547 | 1437102_at   | Region | Ythdf1        | 228994 | 2  | 180621335 | 180637894 | - |
| 17548 | 1441360_at   | Region | Rps6ka3       | 110651 | X  | 152855525 | 152962890 | + |
| 17549 | 1416457_at   | Region | Ddah2         | 51793  | 17 | 32762881  | 32765875  | + |
| 17550 | 1439635_at   | Region | Rgs9          | 19739  | 11 | 109046444 | 109119218 | - |
| 17551 | 1458876_at   | Region | Enah          | 13800  | 1  | 181864370 | 181978518 | - |
| 17552 | 1424835_at   | Region | Gstm4         | 14865  | 3  | 107836150 | 107840530 | - |
| 17553 | 1443399_at   | Region | AU021001      | 99801  | 3  | 85975567  | 85976162  | + |
| 17554 | 1458535_at   | Region | None          | None   | 17 | 34839479  | 34840343  | + |
| 17555 | 1453137_at   | Region | Fbxo30        | 71865  | 10 | 11158930  | 11174522  | + |
| 17556 | 1424033_at   | Region | Sfrs7         | 225027 | 17 | 78017474  | 78024683  | - |
| 17557 | 1428799_at   | Region | 4930431B11Rik | 75782  | 9  | 83721124  | 83770867  | - |
| 17558 | 1436877_at   | Region | Lrch2         | 210297 | X  | 140910434 | 140993991 | - |
| 17559 | 1441526_at   | Region | Mbtd1         | 103537 | 11 | 93733496  | 93766406  | + |
| 17560 | 1418546_a_at | Region | 1700095N21Rik | 76630  | 19 | 33523377  | 33571435  | + |
| 17561 | 1454679_at   | Region | D8Erd457e     | 101994 | 8  | 13248344  | 13259184  | + |
| 17562 | 1433975_at   | Region | Cdk10         | 234854 | 8  | 122599724 | 122607137 | + |
| 17563 | 1441980_at   | Region | C030007I09Rik | 109250 | 3  | 131729850 | 131732085 | + |
| 17564 | 1438819_at   | Region | None          | None   | 1  | 52755942  | 52756828  | - |
| 17565 | 1438519_at   | Region | 4930429H24Rik | 75785  | 16 | 18869169  | 18899359  | + |
| 17566 | 1452818_at   | Region | Ttf2          | 74044  | 3  | 100364769 | 100395573 | - |
| 17567 | 1448024_at   | Region | B430320C24Rik | 319900 | 15 | 11653235  | 11653847  | - |
| 17568 | 1440200_at   | Region | 9630031F12Rik | 58227  | 5  | 44288471  | 44397958  | - |
| 17569 | 1417052_at   | Region | Psmb3         | 26446  | 11 | 97524521  | 97534587  | + |
| 17570 | 1460144_at   | Region | BC052040      | 399568 | 2  | 115095624 | 115292616 | + |
| 17571 | 1459701_x_at | Region | None          | None   | 4  | 97679915  | 97680167  | + |
| 17572 | 1441338_at   | Region | 5930412G12Rik | 319616 | 5  | 127749366 | 127770917 | - |
| 17573 | 1450022_at   | Region | Gtpbp1        | 14904  | 15 | 79743329  | 79772459  | + |
| 17574 | 1417794_at   | Region | Zfp261        | 56364  | X  | 96005746  | 96022210  | - |
| 17575 | 1434275_at   | Region | Nkd2          | 72293  | 13 | 69880109  | 69907684  | - |
| 17576 | 1441456_at   | Region | Mmp24         | 17391  | 2  | 155232322 | 155273266 | + |
| 17577 | 1423303_at   | Region | Paxip1        | 55982  | 5  | 26181592  | 26232266  | - |

|       |              |        |               |        |      |           |           |      |
|-------|--------------|--------|---------------|--------|------|-----------|-----------|------|
| 17578 | 1457279_at   | Region | Sirt7         | 209011 | 11   | 120439464 | 120446060 | -    |
| 17579 | 1444223_at   | Region | Hctr2         | 387285 | 9    | 76364006  | 76461704  | -    |
| 17580 | 1434071_a_at | Region | Pelo          | 105083 | 13   | 111502233 | 111504767 | -    |
| 17581 | 1451822_a_at | Region | Scrn2         | 217140 | 11   | 96851081  | 96855047  | +    |
| 17582 | 1440896_at   | Region | Sfrs15        | 224432 | 16   | 89386383  | 89441935  | -    |
| 17583 | 1428495_at   | Region | 2410003K15Rik | 75593  | 6    | 49205067  | 49220188  | +    |
| 17584 | 1430439_at   | Region | 2810465F10Rik | 78771  | 13   | 72442758  | 73090988  | +    |
| 17585 | 1428786_at   | Region | Nckap1l       | 105855 | 15   | 103516906 | 103561881 | +    |
| 17586 | 1456553_at   | Region | None          | None   | 4    | 107510627 | 107511000 | +    |
| 17587 | 1450842_a_at | Region | Cenpa         | 12615  | 5    | 29125844  | 29133768  | +    |
| 17588 | 1423456_at   | Region | Bzw2          | 66912  | 12   | 32698936  | 32763848  | -    |
| 17589 | 1458340_at   | Region | None          | None   | 16   | 43602143  | 43602419  | -    |
| 17590 | 1455254_at   | Region | 4833420G11Rik | 108863 | 2    | 180436492 | 180438558 | +    |
| 17591 | 1454139_at   | Region | 4930405N21Rik | 73797  | NONE | NONE      | NONE      | NONE |
| 17592 | 1437322_at   | Region | Rbm4          | 19653  | 19   | 4573943   | 4582649   | -    |
| 17593 | 1430132_at   | Region | Krt25d        | 70843  | 11   | 99185959  | 99196076  | -    |
| 17594 | 1443051_at   | Region | None          | None   | 4    | 148563720 | 148564156 | +    |
| 17595 | 1440430_at   | Region | A130004G07Rik | 320687 | 2    | 105442568 | 105443237 | -    |
| 17596 | 1426496_at   | Region | Wdr55         | 67936  | 18   | 36984004  | 36987473  | +    |
| 17597 | 1459951_at   | Region | 4732464A07Rik | 320232 | 11   | 86232678  | 86232978  | -    |
| 17598 | 1441690_at   | Region | Cdh8          | 12564  | 8    | 98317068  | 98691929  | -    |
| 17599 | 1430749_at   | Region | 2810040C05Rik | 72719  | 4    | 34994564  | 34995919  | -    |
| 17600 | 1453247_at   | Region | 2810031P15Rik | 72701  | 4    | 62056769  | 62225062  | +    |
| 17601 | 1419076_a_at | Region | Brca2         | 12190  | 5    | 149463480 | 149510198 | +    |
| 17602 | 1431297_a_at | Region | 4933436C20Rik | 71296  | 8    | 91612610  | 91643238  | -    |
| 17603 | 1430224_at   | Region | Wfdc3         | 71856  | 2    | 164187919 | 164200045 | -    |
| 17604 | 1423716_s_at | Region | Atp5d         | 66043  | 10   | 80265814  | 80269260  | +    |
| 17605 | 1429436_at   | Region | Fnbp3         | 56194  | 2    | 53070637  | 53123349  | -    |
| 17606 | 1424429_s_at | Region | Al225782      | 233875 | 7    | 120902164 | 120911194 | -    |
| 17607 | 1442095_at   | Region | C230079D11Rik | 211961 | 18   | 22565695  | 22746074  | +    |
| 17608 | 1439538_at   | Region | 0610011N22Rik | 67433  | 13   | 70412209  | 70421112  | +    |
| 17609 | 1460499_at   | Region | 9230110I02Rik | 77698  | 3    | 96758002  | 96759021  | -    |
| 17610 | 1451643_a_at | Region | Rab4b         | 19342  | 7    | 22541255  | 22552404  | -    |
| 17611 | 1418544_at   | Region | Csen          | 56461  | 2    | 126970351 | 127035223 | -    |
| 17612 | 1427065_at   | Region | 4933439F18Rik | 66771  | 11   | 60142945  | 60170919  | +    |
| 17613 | 1424337_at   | Region | Snx15         | 69024  | 19   | 5908194   | 5917005   | -    |
| 17614 | 1415981_at   | Region | 5031400M07Rik | 80517  | 9    | 25003408  | 25046786  | -    |
| 17615 | 1425804_at   | Region | Hmx2          | 15372  | 7    | 125864584 | 125872325 | +    |
| 17616 | 1421268_at   | Region | Ugcg          | 22234  | 4    | 59132999  | 59166282  | +    |
| 17617 | 1447926_at   | Region | Arl5          | 75423  | 2    | 52330113  | 52357036  | -    |
| 17618 | 1422641_at   | Region | Dok5          | 76829  | 2    | 170240673 | 170388501 | +    |
| 17619 | 1429007_at   | Region | Slc35b2       | 73836  | 17   | 43074866  | 43078599  | +    |
| 17620 | 1429041_at   | Region | LOC436177     | 436177 | 8    | 19627469  | 19643172  | +    |
| 17621 | 1423499_at   | Region | Sncaip        | 67847  | 18   | 52984667  | 53125606  | +    |
| 17622 | 1446318_at   | Region | Cdw92         | 100434 | 4    | 53356536  | 53538357  | +    |
| 17623 | 1422906_at   | Region | Abcg2         | 26357  | 6    | 58818112  | 58854896  | +    |
| 17624 | 1445727_at   | Region | Ube3a         | 22215  | 7    | 53507062  | 53583196  | +    |
| 17625 | 1458916_at   | Region | Slc12a6       | 107723 | 2    | 111890057 | 111986394 | +    |
| 17626 | 1418430_at   | Region | Kif5b         | 16573  | 18   | 6245790   | 6284051   | -    |
| 17627 | 1435189_at   | Region | Frmpd1        | 242417 | 4    | 45119857  | 45201858  | +    |
| 17628 | 1429153_at   | Region | 6530406A20Rik | 76213  | 12   | 108431856 | 108433798 | -    |
| 17629 | 1444086_at   | Region | E030049G20Rik | 210356 | 1    | 125748845 | 126327642 | -    |
| 17630 | 1445239_at   | Region | Gatad2a       | 234366 | 8    | 69059749  | 69147743  | -    |
| 17631 | 1417621_at   | Region | Nfatc1        | 18018  | 18   | 80729557  | 80836410  | -    |
| 17632 | 1423774_a_at | Region | Prc1          | 233406 | 7    | 74094603  | 74116367  | +    |
| 17633 | 1430662_at   | Region | 9430091E24Rik | 434350 | 8    | 110441032 | 110450927 | -    |
| 17634 | 1436762_x_at | Region | Elp3          | 74195  | 14   | 60057876  | 60120430  | -    |
| 17635 | 1460731_at   | Region | Slc35c2       | 228875 | 2    | 164733289 | 164744560 | -    |
| 17636 | 1420518_a_at | Region | Igsf9         | 93842  | 1    | 172411236 | 172427797 | +    |
| 17637 | 1417775_at   | Region | Rpo1-4        | 20019  | 6    | 72241050  | 72311336  | +    |
| 17638 | 1441092_at   | Region | 9330159M07Rik | 319673 |      | 60831014  | 60844838  | -    |
| 17639 | 1446539_at   | Region | Inpp4b        | 234515 | 8    | 81240635  | 81241286  | +    |
| 17640 | 1422880_at   | Region | Sypl          | 19027  | 12   | 29560169  | 29583105  | +    |
| 17641 | 1439997_at   | Region | A930006D20Rik | 77939  | 16   | 90166348  | 90168084  | -    |
| 17642 | 1445161_at   | Region | Usp6nl        | 98910  | 2    | 6270005   | 6360769   | +    |

|       |              |        |               |        |    |           |           |   |
|-------|--------------|--------|---------------|--------|----|-----------|-----------|---|
| 17643 | 1439089_at   | Region | Zbtb41        | 226470 | 1  | 139269557 | 139296474 | + |
| 17644 | 1438689_at   | Region | 4632433K11Rik | 77043  | 7  | 4282563   | 4285253   | + |
| 17645 | 1458018_at   | Region | Ppm1h         | 319468 | 10 | 122369636 | 122614468 | + |
| 17646 | 1442626_at   | Region | 5730405I09Rik | 67974  | 18 | 9356614   | 9490220   | - |
| 17647 | 1454937_at   | Region | B630005N14Rik | 101148 | 6  | 13612888  | 13664917  | - |
| 17648 | 1432462_a_at | Region | Crsp8         | 68975  | 2  | 29278998  | 29456950  | + |
| 17649 | 1455466_at   | Region | Gpr133        | 243277 | 5  | 128303253 | 128379025 | + |
| 17650 | 1459823_at   | Region | Ehd2          | 259300 | 7  | 86        | 1894      | + |
| 17651 | 1442454_at   | Region | Top2a         | 21973  | 11 | 98814490  | 98845202  | - |
| 17652 | 1426223_at   | Region | 2810439F02Rik | 72747  | 18 | 12831155  | 12924403  | + |
| 17653 | 1440500_at   | Region | Map3k10       | 269881 | 7  | 23031316  | 23063618  | - |
| 17654 | 1445340_at   | Region | Phr1          | 105689 | 14 | 97658865  | 97891435  | - |
| 17655 | 1444244_at   | Region | None          | None   | 18 | 21339796  | 21341335  | - |
| 17656 | 1451160_s_at | Region | Pvr           | 52118  | 7  | 633       | 12546     | - |
| 17657 | 1423657_at   | Region | Cdipt         | 52858  | 7  | 121026080 | 121030232 | + |
| 17658 | 1419446_at   | Region | Tbc1d1        | 57915  | 5  | 62958072  | 63146849  | + |
| 17659 | 1458363_at   | Region | Zdhhc17       | 320150 | 10 | 110565885 | 110632856 | - |
| 17660 | 1428904_at   | Region | E230022H04Rik | 225339 | 18 | 32000024  | 32022887  | + |
| 17661 | 1423159_at   | Region | Did           | 13382  | 12 | 27907566  | 27927401  | - |
| 17662 | 1424489_a_at | Region | Trit1         | 66966  | 4  | 122043709 | 122082046 | + |
| 17663 | 1429667_at   | Region | E130119J07Rik | 78006  | 14 | 99005077  | 99007471  | - |
| 17664 | 1456145_at   | Region | Dleu2         | 328425 | 14 | 56161792  | 56162846  | - |
| 17665 | 1460487_at   | Region | 1110014L15Rik | 66127  | 7  | 5874719   | 5876524   | - |
| 17666 | 1451251_at   | Region | Appbp2        | 66884  | 11 | 84919300  | 84963112  | - |
| 17667 | 1451037_at   | Region | Ptpn9         | 56294  | 9  | 57108988  | 57176293  | + |
| 17668 | 1422887_a_at | Region | Ctbp2         | 13017  | 7  | 127353901 | 127489679 | - |
| 17669 | 1438679_at   | Region | Trim8         | 93679  | 19 | 46050008  | 46064111  | + |
| 17670 | 1429449_at   | Region | Samd4         | 74480  | 14 | 41964485  | 42183012  | + |
| 17671 | 1458347_s_at | Region | Tmprss2       | 50528  | 16 | 97049264  | 97095777  | - |
| 17672 | 1439012_a_at | Region | Dck           | 13178  | 5  | 88030861  | 88049111  | + |
| 17673 | 1459532_at   | Region | Grm7          | 108073 | 6  | 112054724 | 112055296 | + |
| 17674 | 1421379_at   | Region | Zfp354b       | 27274  | 11 | 50674664  | 50683826  | - |
| 17675 | 1430032_at   | Region | 4921506I22Rik | 66704  | 19 | 4545410   | 4554730   | + |
| 17676 | 1422806_x_at | Region | Ing3          | 71777  | 6  | 21996682  | 22023073  | + |
| 17677 | 1421115_a_at | Region | Zdhhc16       | 74168  | 19 | 41477885  | 41488472  | + |
| 17678 | 1450881_s_at | Region | Tm7sf1        | 83924  | 13 | 12777506  | 12812482  | - |
| 17679 | 1428694_at   | Region | 5033413D16Rik | 75957  | 14 | 109602514 | 109605268 | + |
| 17680 | 1433882_at   | Region | Cnot10        | 78893  | 9  | 114550674 | 114606723 | - |
| 17681 | 1427075_s_at | Region | 5330414D10Rik | 245867 | 2  | 181554859 | 181574406 | + |
| 17682 | 1445545_at   | Region | 2610318G18Rik | 67171  | 3  | 106343709 | 106369981 | + |
| 17683 | 1426431_at   | Region | Jag2          | 16450  | 12 | 108384687 | 108405592 | - |
| 17684 | 1454931_at   | Region | Cri2          | 386655 | 7  | 23665390  | 23666100  | + |
| 17685 | 1442264_at   | Region | LOC381240     | 381240 | 19 | 6197625   | 6198089   | + |
| 17686 | 1417104_at   | Region | Emp3          | 13732  | 7  | 40003815  | 40007155  | - |
| 17687 | 1437580_s_at | Region | Nek2          | 18005  | 1  | 191557109 | 191568589 | + |
| 17688 | 1433210_at   | Region | Rptn          | 20129  | 3  | 93110842  | 93116585  | + |
| 17689 | 1427335_at   | Region | 6720456H20Rik | 218989 | 14 | 43535510  | 43604020  | + |
| 17690 | 1417586_at   | Region | Timeless      | 21853  | 10 | 127972037 | 127989758 | + |
|       |              |        | Metap2 ///    |        |    |           |           |   |
| 17691 | 1436531_at   | Region | A930035J23Rik | 109310 | 10 | 93824804  | 93833552  | + |
| 17692 | 1459210_at   | Region | B130017P16Rik | 81907  | 9  | 103460526 | 103476281 | - |
| 17693 | 1459609_at   | Region | Arhgap10      | 78514  | 8  | 76458897  | 76659183  | - |
| 17694 | 1429212_a_at | Region | Lrrc51        | 69358  | 7  | 96019084  | 96027318  | - |
| 17695 | 1458633_at   | Region | Snx8          | 231834 | 5  | 139336643 | 139385591 | - |
| 17696 | 1443652_x_at | Region | Spred1        | 114715 | 2  | 116635298 | 116693185 | + |
| 17697 | 1450883_a_at | Region | Cd36          | 12491  | 5  | 16201482  | 16256089  | - |
| 17698 | 1438541_at   | Region | 4933439F18Rik | 66771  | 11 | 60142945  | 60170919  | + |
| 17699 | 1415792_at   | Region | AL033326      | 24105  | 2  | 151773272 | 151789571 | + |
| 17700 | 1458897_at   | Region | Ust           | 338362 | 10 | 8072157   | 8390183   | - |
| 17701 | 1446947_at   | Region | None          | None   | 2  | 135431833 | 135432403 | + |
| 17702 | 1446293_at   | Region | Bcl11a        | 14025  | 11 | 23972907  | 24067984  | + |
| 17703 | 1419679_at   | Region | Lats2         | 50523  | 14 | 52225857  | 52269062  | - |
| 17704 | 1425088_at   | Region | Scnn1a        | 20276  | 6  | 125978533 | 126001623 | + |
| 17705 | 1423194_at   | Region | Arhgap5       | 11855  | 12 | 49267090  | 49318371  | + |
| 17706 | 1415886_at   | Region | Sh2d3c        | 27387  | 2  | 32653234  | 32687156  | + |



|       |              |        |               |        |    |           |           |   |
|-------|--------------|--------|---------------|--------|----|-----------|-----------|---|
| 17707 | 1430982_at   | Region | Sfrs1         | 110809 | 11 | 87775771  | 87779641  | + |
| 17708 | 1418621_at   | Region | Rab2          | 59021  | 4  | 8462790   | 8534848   | + |
| 17709 | 1440986_at   | Region | Rpap1         | 68925  | 2  | 119277813 | 119301347 | - |
| 17710 | 1435928_at   | Region | None          | None   | 8  | 119519010 | 119520814 | + |
| 17711 | 1452120_at   | Region | 4931433E08Rik | 70999  | 19 | 6941795   | 6955246   | - |
| 17712 | 1448836_s_at | Region | A1838661      | 100210 | 4  | 132545279 | 132552633 | + |
| 17713 | 1417064_at   | Region | Jagn1         | 67767  | 6  | 114010464 | 114016057 | + |
| 17714 | 1459733_at   | Region | None          | None   | 1  | 172130713 | 172131101 | - |
| 17715 | 1422397_a_at | Region | Il15ra        | 16169  | 2  | 11621545  | 11649971  | + |
| 17716 | 1417911_at   | Region | Ccna2         | 12428  | 3  | 36028468  | 36035544  | - |
| 17717 | 1436429_at   | Region | Zfp606        | 67370  | 7  | 10522586  | 10539938  | + |
| 17718 | 1454384_at   | Region | 2900057C01Rik | 72987  | 8  | 106272520 | 106273640 | + |
| 17719 | 1442212_at   | Region | Cpd           | 12874  | 11 | 76507648  | 76572655  | - |
| 17720 | 1448981_x_at | Region | Tcl1b1        | 27379  | 12 | 100603840 | 100610761 | + |
| 17721 | 1426096_at   | Region | BC006705      | 214572 | 8  | 105506901 | 105547541 | + |
| 17722 | 1447846_x_at | Region | 5730589L02Rik | 77582  | 7  | 1165      | 3428      | - |
| 17723 | 1426618_a_at | Region | Pomgnt1       | 68273  | 4  | 115109430 | 115118749 | + |
| 17724 | 1455535_at   | Region | A730017D01Rik | 319649 | 6  | 144674668 | 144675623 | - |
| 17725 | 1426515_a_at | Region | Tor1a         | 30931  | 2  | 30892789  | 30900053  | - |
| 17726 | 1447146_s_at | Region | D11Ertd730e   | 193116 | 11 | 43186568  | 43200818  | + |
| 17727 | 1423562_at   | Region | ORF31         | 260297 | 17 | 32332934  | 32335508  | + |
| 17728 | 1439367_x_at | Region | Arf4          | 11843  | 14 | 24734402  | 24753463  | + |
| 17729 | 1440259_at   | Region | Man1b         | 17156  | 3  | 99992328  | 100111138 | - |
| 17730 | 1454929_s_at | Region | Safb          | 224903 | 17 | 54273431  | 54294731  | + |
| 17731 | 1456736_x_at | Region | 5230400G24Rik | 75734  | 1  | 83054024  | 83081496  | + |
| 17732 | 1434322_at   | Region | A930021H16Rik | 231830 | 5  | 138703020 | 138729158 | - |
| 17733 | 1425347_a_at | Region | Zfp318        | 57908  | 17 | 43894944  | 43929210  | + |
| 17734 | 1421740_at   | Region | Gnas          | 14683  | 2  | 173709228 | 173771651 | + |
| 17735 | 1418800_at   | Region | Bhlhb8        | 17341  | 5  | 143231899 | 143236054 | + |
| 17736 | 1459963_at   | Region | None          | None   | X  | 88224301  | 88224647  | - |
|       |              |        | Arih2 ///     |        |    |           |           |   |
| 17737 | 1445934_at   | Region | LOC432565     | 23807  | 9  | 108651717 | 108698223 | - |
| 17738 | 1421892_at   | Region | None          | None   | 8  | 110254745 | 110270197 | + |
| 17739 | 1451765_a_at | Region | Entpd5        | 12499  | 12 | 81245023  | 81273816  | - |
| 17740 | 1454661_at   | Region | Atp5g3        | 228033 | 2  | 73606199  | 73609043  | - |
| 17741 | 1422423_at   | Region | Magea7        | 17143  | X  | 71008049  | 71008291  | + |
| 17742 | 1450873_at   | Region | Gtpbp4        | 69237  | 13 | 8956055   | 8979603   | - |
| 17743 | 1425313_at   | Region | Carf          | 241066 | 1  | 60401596  | 60454354  | + |
| 17744 | 1441321_at   | Region | LOC552911     | 552911 | 3  | 51633932  | 51635160  | - |
| 17745 | 1453726_s_at | Region | 2810407C02Rik | 69227  | 3  | 58220979  | 58236191  | + |
| 17746 | 1433442_at   | Region | Klh9          | 242521 | 4  | 87705774  | 87708653  | - |
| 17747 | 1417055_at   | Region | 0610009D07Rik | 66055  | 12 | 3985835   | 3999611   | + |
| 17748 | 1424297_at   | Region | Zfp282        | 101095 | 6  | 48002230  | 48031647  | + |
| 17749 | 1453300_at   | Region | Slc35d2       | 70484  | 13 | 61482262  | 61514080  | - |
| 17750 | 1426138_a_at | Region | Ube2j2        | 140499 | 4  | 154436212 | 154451966 | + |
| 17751 | 1439726_at   | Region | 4432406C05Rik | 66690  | 16 | 8307024   | 8310994   | - |
| 17752 | 1453747_at   | Region | 2810021J22Rik | 69944  | 11 | 58592869  | 58609967  | + |
| 17753 | 1437689_x_at | Region | Clu           | 12759  | 14 | 60496045  | 60508968  | + |
| 17754 | 1442806_at   | Region | 9430030N17Rik | 77336  | 19 | 44574409  | 44575550  | + |
| 17755 | 1444704_at   | Region | D5Ertd606e    | 52398  | 5  | 92429207  | 92510708  | + |
| 17756 | 1442171_at   | Region | Fnbp3         | 56194  | 2  | 53070637  | 53123349  | - |
| 17757 | 1429670_a_at | Region | Lrriq2        | 74201  | 16 | 54796937  | 54831308  | - |
| 17758 | 1433258_at   | Region | A330102K18Rik | 77919  | 6  | 96497563  | 96498566  | - |
| 17759 | 1438045_at   | Region | Eea1          | 216238 | 10 | 95914281  | 96016681  | + |
| 17760 | 1451035_a_at | Region | Akr1a4        | 58810  | 4  | 115595415 | 115610556 | - |
| 17761 | 1418120_at   | Region | Rbm8a         | 60365  | 3  | 96117769  | 96120746  | + |
| 17762 | 1448171_at   | Region | Siah2         | 20439  | 3  | 58325606  | 58343045  | - |
| 17763 | 1434542_at   | Region | Gpt2          | 108682 | 8  | 84765391  | 84800332  | + |
| 17764 | 1425621_at   | Region | Trim35        | 66854  | 14 | 60824516  | 60836924  | + |
| 17765 | 1435080_x_at | Region | 5730406M06Rik | 66625  | 4  | 21916954  | 21945846  | + |
| 17766 | 1456846_at   | Region | LOC382639     | 382639 | 12 | 108158656 | 108162134 | + |
| 17767 | 1454945_at   | Region | Lrriq2        | 74201  | 16 | 54796937  | 54831308  | - |
| 17768 | 1451207_at   | Region | Cbara1        | 216001 | 10 | 59664687  | 59819557  | + |
| 17769 | 1425595_at   | Region | Gabbr1        | 54393  | 17 | 34805575  | 34833793  | + |
| 17770 | 1454551_at   | Region | 9530034D02Rik | 78417  | 6  | 31407610  | 31408715  | + |

|       |              |        |               |        |      |           |           |      |
|-------|--------------|--------|---------------|--------|------|-----------|-----------|------|
| 17771 | 1416433_at   | Region | Rpa2          | 19891  | 4    | 131729260 | 131739382 | +    |
| 17772 | 1442093_at   | Region | None          | None   | 4    | 127958354 | 127959178 | -    |
| 17773 | 1415733_a_at | Region | 1110019J04Rik | 68512  | 4    | 45021131  | 45024027  | -    |
| 17774 | 1423964_at   | Region | Cpsf3l        | 71957  | 4    | 154361929 | 154381465 | +    |
| 17775 | 1449234_at   | Region | Car15         | 80733  | 16   | 16606239  | 16609149  | -    |
| 17776 | 1452099_at   | Region | AA408296      | 215193 | 1    | 192843167 | 192869015 | -    |
| 17777 | 1457350_at   | Region | Per2          | 18627  | 1    | 91239024  | 91282480  | -    |
| 17778 | 1442184_at   | Region | Slc24a3       | 94249  | 2    | 144905442 | 145098889 | +    |
| 17779 | 1458420_at   | Region | 9430057O19Rik | 231093 | 5    | 29347796  | 29355631  | +    |
| 17780 | 1451085_at   | Region | C030006K11Rik | 223665 | 15   | 76772844  | 76775219  | -    |
| 17781 | 1446455_at   | Region | None          | None   | NONE | NONE      | NONE      | NONE |
| 17782 | 1448019_at   | Region | 2900006A08Rik | 72857  | 5    | 116403447 | 116403882 | +    |
| 17783 | 1456260_at   | Region | Rbbp4         | 19646  | 4    | 128334213 | 128362483 | -    |
| 17784 | 1455906_at   | Region | 6030446N20Rik | 338363 | 18   | 12168904  | 12309081  | -    |
| 17785 | 1415940_at   | Region | AA407930      | 100494 | 5    | 138468708 | 138481909 | -    |
| 17786 | 1445212_at   | Region | C330023M02Rik | 231713 | 5    | 120549789 | 120591920 | +    |
| 17787 | 1422603_at   | Region | Rnase4        | 58809  | 14   | 46185837  | 46200781  | +    |
| 17788 | 1449477_s_at | Region | Slc2a10       | 170441 | 2    | 164960708 | 164976644 | +    |
| 17789 | 1429584_at   | Region | Mynn          | 80732  | 3    | 30012186  | 30028739  | +    |
| 17790 | 1457131_at   | Region | 9330186A19Rik | 320365 | 5    | 149134722 | 149437633 | +    |
| 17791 | 1439870_at   | Region | A330008L17Rik | 234624 | 8    | 98707406  | 98715396  | +    |
| 17792 | 1415682_at   | Region | Xpo7          | 65246  | 14   | 64979347  | 65026150  | -    |
| 17793 | 1445867_at   | Region | AL023008      | 101715 | 7    | 91651148  | 91651930  | +    |
| 17794 | 1439126_at   | Region | 1110007A13Rik | 210711 | 7    | 122745901 | 122814730 | -    |
| 17795 | 1424895_at   | Region | Gpsm2         | 76123  | 3    | 108474380 | 108517885 | -    |
| 17796 | 1428954_at   | Region | Slc9a3r2      | 65962  | 17   | 22442873  | 22453949  | -    |
| 17797 | 1425224_at   | Region | BC019561      | 225655 | 18   | 67695686  | 67710555  | +    |
| 17798 | 1418729_at   | Region | Star          | 20845  | 8    | 24533262  | 24540731  | +    |
| 17799 | 1429363_at   | Region | D8Erd531e     | 52348  | 8    | 39455470  | 39493394  | +    |
| 17800 | 1446641_at   | Region | Syt7          | 54525  | 19   | 9585980   | 9644941   | +    |
| 17801 | 1452143_at   | Region | Spnb2         | 20742  | 11   | 29995224  | 30114564  | -    |
| 17802 | 1438610_a_at | Region | Cryz          | 12972  | 3    | 153604204 | 153630187 | +    |
| 17803 | 1458006_at   | Region | Cpm           | 70574  | 10   | 117346301 | 117376298 | +    |
| 17804 | 1424781_at   | Region | D10Ucla1      | 28193  | 10   | 67048137  | 67134030  | -    |
| 17805 | 1423755_at   | Region | Zcchc8        | 70650  | 5    | 122870982 | 122892129 | -    |
| 17806 | 1456653_a_at | Region | Mthfd1l       | 270685 | 10   | 6349713   | 6535179   | -    |
| 17807 | 1442164_at   | Region | Blzf1         | 66352  | 1    | 164208297 | 164225981 | -    |
| 17808 | 1424966_at   | Region | Tmem40        | 94346  | 6    | 116166666 | 116179922 | -    |
| 17809 | 1452087_at   | Region | Epsti1        | 108670 | 14   | 72246823  | 72345085  | +    |
| 17810 | 1442427_at   | Region | 9630026M06Rik | 320524 | 7    | 17493226  | 17493795  | -    |
| 17811 | 1453446_at   | Region | 6430411K18Rik | 76880  | 12   | 105068540 | 105069857 | +    |
| 17812 | 1439868_at   | Region | Sidt2         | 214597 | 9    | 45951127  | 45968501  | -    |
| 17813 | 1454109_a_at | Region | Ptdsr         | 107817 | 11   | 116658525 | 116664468 | -    |
| 17814 | 1430386_at   | Region | 9030417F11Rik | 74537  | 19   | 15392526  | 15394428  | +    |
| 17815 | 1459516_at   | Region | Cul1          | 26965  | 6    | 47656010  | 47727829  | +    |
| 17816 | 1446086_s_at | Region | Gli2          | 14633  | 1    | 118586114 | 118804994 | -    |
| 17817 | 1457059_at   | Region | B830013J05Rik | 240186 | 18   | 5214775   | 5339178   | -    |
| 17818 | 1455166_at   | Region | None          | None   | 2    | 15007173  | 15008729  | +    |
| 17819 | 1437220_x_at | Region | Psmd13        | 23997  | 7    | 135284278 | 135300400 | +    |
| 17820 | 1434496_at   | Region | Plk3          | 12795  | 4    | 116087560 | 116092849 | -    |
| 17821 | 1424819_a_at | Region | AI114950      | 101489 | 7    | 135259333 | 135265613 | +    |
| 17822 | 1457510_at   | Region | None          | None   | NONE | NONE      | NONE      | NONE |
| 17823 | 1425506_at   | Region | Mylk          | 107589 | 16   | 33677883  | 33783686  | +    |
| 17824 | 1437149_at   | Region | Slc6a6        | 21366  | 6    | 92133220  | 92208188  | +    |
| 17825 | 1432287_a_at | Region | Sntg1         | 71096  | 1    | 8450893   | 9404007   | -    |
| 17826 | 1458566_at   | Region | Gpatc2        | 67769  | 1    | 186723158 | 186859064 | +    |
| 17827 | 1451522_s_at | Region | Lrch4         | 231798 | 5    | 136579783 | 136591102 | +    |
| 17828 | 1458015_at   | Region | 2410080H04Rik | 214058 | 9    | 64507881  | 64823155  | +    |
| 17829 | 1440961_at   | Region | 9130604C24Rik | 77707  | 5    | 136453502 | 136454495 | +    |
| 17830 | 1448484_at   | Region | Amd1          | 11702  | 10   | 40363437  | 40378151  | -    |
| 17831 | 1447895_x_at | Region | 2700050F09Rik | 72587  | 5    | 146439784 | 146439986 | +    |
| 17832 | 1425629_a_at | Region | Nol6          | 230082 | 4    | 41253278  | 41263139  | -    |
| 17833 | 1416358_at   | Region | 0610009O03Rik | 68294  | 5    | 33121321  | 33124788  | -    |
| 17834 | 1449534_at   | Region | Sycp3         | 20962  | 10   | 88431421  | 88445069  | +    |
| 17835 | 1443276_at   | Region | None          | None   | 5    | 26294686  | 26295340  | +    |

|       |              |        |                   |        |      |           |           |      |
|-------|--------------|--------|-------------------|--------|------|-----------|-----------|------|
| 17836 | 1448472_at   | Region | Vars2             | 22321  | 17   | 32704913  | 32720106  | +    |
| 17837 | 1418858_at   | Region | Aox3              | 71724  | 1    | 58417941  | 58505250  | +    |
| 17838 | 1417513_at   | Region | Evi5              | 14020  | 5    | 106815244 | 106945556 | -    |
| 17839 | 1415783_at   | Region | Vps35             | 65114  | 8    | 84533166  | 84572272  | -    |
| 17840 | 1438257_at   | Region | Zfp313            | 81018  | 2    | 166949378 | 166972899 | +    |
| 17841 | 1429974_at   | Region | Tbx18             | 76365  | 9    | 88049059  | 88076120  | -    |
| 17842 | 1426931_s_at | Region | D19Bwg1357e       | 52874  | 19   | 26629949  | 26669888  | -    |
| 17843 | 1438788_at   | Region | D5Wsu152e         | 28022  | 5    | 89612092  | 89612660  | -    |
| 17844 | 1418888_a_at | Region | Sepx1             | 27361  | 17   | 22541758  | 22547868  | +    |
| 17845 | 1423224_at   | Region | 4432405B04Rik     | 67978  | 5    | 123770127 | 123798992 | +    |
| 17846 | 1436286_at   | Region | B830017H08Rik     | 433004 | 16   | 16604082  | 16605982  | +    |
| 17847 | 1454804_at   | Region | AK129375          | 217365 | 11   | 120201464 | 120258761 | -    |
| 17848 | 1453427_at   | Region | Csnk2a1           | 12995  | 2    | 151683883 | 151738783 | +    |
| 17849 | 1454692_x_at | Region | Hnrpk             | 15387  | 13   | 57024107  | 57034672  | -    |
| 17850 | 1443455_at   | Region | None              | None   | NONE | NONE      | NONE      | NONE |
| 17851 | 1425350_a_at | Region | Myef2             | 17876  | 2    | 124602727 | 124630728 | -    |
| 17852 | 1436008_at   | Region | None              | None   | 3    | 8915557   | 8916202   | -    |
| 17853 | 1446372_at   | Region | None              | None   | 5    | 114258946 | 114259303 | -    |
|       |              |        | A930007A09Rik /// |        |      |           |           |      |
| 17854 | 1439547_at   | Region | LOC436338         | 432999 | 16   | 12491310  | 12495281  | +    |
| 17855 | 1434577_at   | Region | BC052040          | 399568 | 2    | 115095624 | 115292616 | +    |
| 17856 | 1435882_at   | Region | Ubap2l            | 74383  | 3    | 89810481  | 89862883  | -    |
| 17857 | 1452235_at   | Region | Man1b1            | 227619 | 2    | 25264929  | 25284370  | +    |
| 17858 | 1420486_at   | Region | Nol7              | 70078  | 13   | 42960833  | 42965301  | +    |
| 17859 | 1416231_at   | Region | Vac14             | 234729 | 8    | 109916360 | 110018120 | +    |
| 17860 | 1424584_a_at | Region | Ranbp10           | 74334  | 8    | 105064168 | 105123194 | -    |
| 17861 | 1437242_at   | Region | BC055368          | 223723 | 15   | 83624409  | 83643711  | -    |
| 17862 | 1457850_at   | Region | None              | None   | 3    | 30727288  | 30728156  | +    |
| 17863 | 1424001_at   | Region | Mki67ip           | 67949  | 1    | 118071365 | 118083106 | +    |
| 17864 | 1427282_a_at | Region | Fxn               | 14297  | 19   | 23500411  | 23519551  | -    |
| 17865 | 1427016_at   | Region | 4932438A13Rik     | 229227 | 3    | 36326717  | 36516613  | +    |
| 17866 | 1439434_x_at | Region | BC036961          | 230863 | 4    | 137131739 | 137142223 | +    |
| 17867 | 1457073_at   | Region | None              | None   | NONE | NONE      | NONE      | NONE |
| 17868 | 1437761_at   | Region | Luc7l2            | 192196 | 6    | 38687728  | 38745622  | +    |
| 17869 | 1420966_at   | Region | Slc25a15          | 18408  | 8    | 21128178  | 21150724  | -    |
| 17870 | 1424900_at   | Region | Slc29a4           | 243328 | 5    | 141710941 | 141734430 | +    |
| 17871 | 1438911_at   | Region | 38602             | 235072 | 9    | 25147069  | 25202879  | +    |
| 17872 | 1436870_s_at | Region | AU041783          | 226250 | 19   | 56497989  | 56593808  | -    |
| 17873 | 1421683_at   | Region | Tcte3             | 21647  | 17   | 13011845  | 13026205  | -    |
| 17874 | 1451376_at   | Region | 5730596K20Rik     | 109168 | 19   | 7208422   | 7249028   | +    |
| 17875 | 1459150_at   | Region | Lrch1             | 380916 | 14   | 69108806  | 69291857  | -    |
| 17876 | 1424653_at   | Region | Tspan15           | 70423  | 10   | 62153969  | 62197769  | -    |
| 17877 | 1455060_at   | Region | MGI:1351465       | 27041  | 11   | 55238464  | 55253728  | +    |
| 17878 | 1421947_at   | Region | Gng12             | 14701  | 6    | 67148787  | 67270629  | +    |
| 17879 | 1429376_s_at | Region | Anapc10           | 68999  | 8    | 78925931  | 78991431  | +    |
| 17880 | 1429174_at   | Region | Wdr34             | 71820  | 2    | 29963713  | 29980992  | -    |
| 17881 | 1452354_at   | Region | 2810459M11Rik     | 72792  | 1    | 85852319  | 85861811  | +    |
| 17882 | 1418844_at   | Region | Dibd1             | 102580 | 9    | 50847656  | 50915854  | +    |
| 17883 | 1446722_at   | Region | Gna13             | 14674  | 11   | 109184029 | 109219306 | +    |
| 17884 | 1458222_at   | Region | None              | None   | 5    | 149601867 | 149602390 | -    |
| 17885 | 1435804_at   | Region | Eif4e2            | 26987  | 1    | 87030076  | 87054566  | +    |
| 17886 | 1431377_at   | Region | Sca10             | 54138  | 15   | 85384867  | 85511564  | +    |
| 17887 | 1434175_s_at | Region | 2210010N04Rik     | 70381  | 5    | 143236935 | 143265219 | -    |
| 17888 | 1418907_at   | Region | F5                | 14067  | 1    | 164069551 | 164140290 | +    |
| 17889 | 1434536_at   | Region | Gpr75             | 237716 | 11   | 30785887  | 30787509  | +    |
| 17890 | 1447122_at   | Region | 4930438O05Rik     | 78795  | 1    | 85961103  | 86084595  | +    |
| 17891 | 1431455_at   | Region | 4933401B01Rik     | 71027  | 16   | 56176496  | 56201633  | -    |
| 17892 | 1453512_at   | Region | 5830407P18Rik     | 78818  | 14   | 114968680 | 114970273 | -    |
| 17893 | 1442223_at   | Region | Enah              | 13800  | 1    | 181864370 | 181978518 | -    |
| 17894 | 1442126_at   | Region | 5830417C01Rik     | 78825  | 1    | 178140297 | 178205198 | +    |
| 17895 | 1455608_at   | Region | 2610207F23Rik     | 67161  | 3    | 41056512  | 41247364  | -    |
| 17896 | 1441753_at   | Region | 4921505C17Rik     | 78757  | 15   | 6496946   | 6588954   | +    |
| 17897 | 1429863_at   | Region | A830039N02Rik     | 102994 | X    | 30948963  | 30982898  | +    |
| 17898 | 1459250_at   | Region | MGI:2153084       | 228911 | 2    | 169579870 | 169580552 | +    |
| 17899 | 1438887_a_at | Region | Gcl               | 23885  | 6    | 87126075  | 87167665  | -    |

|       |              |        |               |        |    |           |           |   |
|-------|--------------|--------|---------------|--------|----|-----------|-----------|---|
| 17900 | 1416486_at   | Region | Scye1         | 13722  | 3  | 131550899 | 131574226 | - |
| 17901 | 1446007_at   | Region | Bmp1          | 12153  | 14 | 64790547  | 64836177  | - |
| 17902 | 1433859_at   | Region | D030070L09Rik | 225280 | 18 | 24333257  | 24350315  | - |
| 17903 | 1455290_at   | Region | Znrf2         | 387524 | 6  | 54961241  | 55034061  | + |
| 17904 | 1437300_at   | Region | Mef2d         | 17261  | 3  | 87886291  | 87912587  | + |
| 17905 | 1457349_at   | Region | Gm69          | 217602 | 12 | 54442560  | 54518225  | + |
| 17906 | 1457508_at   | Region | C430003N24Rik | 320358 | 10 | 108071515 | 108072185 | + |
| 17907 | 1436909_at   | Region | B430110G05Rik | 229517 | 3  | 88154362  | 88168982  | - |
| 17908 | 1454168_a_at | Region | Skd3          | 20480  | 7  | 95770056  | 95896228  | + |
| 17909 | 1435562_at   | Region | Pdzk8         | 107368 | 19 | 58895293  | 58896325  | - |
| 17910 | 1439289_s_at | Region | 0710005I19Rik | 71691  | 7  | 13910706  | 13913231  | + |
| 17911 | 1452254_at   | Region | Mtmr9         | 210376 | 14 | 58054197  | 58074540  | - |
| 17912 | 1435810_at   | Region | 5730455O13Rik | 70567  | 19 | 37532284  | 37607394  | - |
| 17913 | 1439178_at   | Region | Adrbk2        | 320129 | 5  | 111987619 | 112085665 | - |
| 17914 | 1458520_at   | Region | Hipk2         | 15258  | 6  | 38834084  | 39012133  | - |
| 17915 | 1436473_at   | Region | Zfp248        | 72720  | 6  | 118859906 | 118888093 | - |
| 17916 | 1454238_a_at | Region | 1700010H22Rik | 75500  | 5  | 97573258  | 97586555  | - |
| 17917 | 1446886_at   | Region | Usp3          | 235441 | 9  | 66641895  | 66716994  | - |
| 17918 | 1434578_x_at | Region | Ran           | 19384  | 5  | 128195181 | 128199286 | + |
| 17919 | 1418256_at   | Region | Srf           | 20807  | 17 | 44056896  | 44066219  | - |
| 17920 | 1453366_at   | Region | Tdrkh         | 72634  | 3  | 93901088  | 93920457  | + |
| 17921 | 1437260_at   | Region | Mmrr1         | 70945  | 6  | 61184420  | 61229308  | + |
| 17922 | 1450896_at   | Region | Arhgap5       | 11855  | 12 | 49267090  | 49318371  | + |
| 17923 | 1455581_x_at | Region | 9530028C05    | 330256 | 6  | 3285716   | 3298593   | - |
| 17924 | 1443155_at   | Region | None          | None   | 5  | 4872941   | 4873474   | - |
| 17925 | 1437124_at   | Region | A630052C17Rik | 320757 | 11 | 29066121  | 29068348  | - |
| 17926 | 1451764_at   | Region | Marveld3      | 73608  | 8  | 109245590 | 109259848 | - |
| 17927 | 1452612_at   | Region | Zfp294        | 78913  | 16 | 86525259  | 86582064  | - |
| 17928 | 1425193_at   | Region | 2010106G01Rik | 66552  | 2  | 126407985 | 126447088 | - |
| 17929 | 1435670_at   | Region | Tcfap2b       | 21419  | 1  | 19426696  | 19452210  | + |
| 17930 | 1435995_at   | Region | Mrpl22        | 216767 | 11 | 57897290  | 57905194  | + |
| 17931 | 1418826_at   | Region | Ms4a6b        | 69774  | 19 | 10715058  | 10726902  | + |
| 17932 | 1428962_at   | Region | 1700013F07Rik | 75504  | 3  | 108333288 | 108340461 | + |
| 17933 | 1442332_at   | Region | Tgfb3         | 21814  | 5  | 106170128 | 106359608 | - |
| 17934 | 1416299_at   | Region | Shcbp1        | 20419  | 8  | 4097851   | 4141461   | - |
| 17935 | 1443830_x_at | Region | Rnf103        | 22644  | 6  | 71825871  | 71842858  | + |
| 17936 | 1437428_x_at | Region | Eif2b2        | 217715 | 12 | 82088696  | 82095811  | + |
| 17937 | 1433783_at   | Region | Ldb3          | 24131  | 14 | 32665465  | 32724864  | - |
| 17938 | 1439096_at   | Region | 5330420D20Rik | 70503  | 10 | 40708813  | 40729005  | + |
| 17939 | 1458229_at   | Region | Robo2         | 268902 | 16 | 73001837  | 73492850  | - |
| 17940 | 1429622_at   | Region | Cand2         | 67088  | 6  | 116212110 | 116242404 | + |
| 17941 | 1417099_at   | Region | Ftsj1         | 54632  | X  | 6477608   | 6491346   | - |
| 17942 | 1421426_at   | Region | Hhip          | 15245  | 8  | 79185726  | 79272113  | - |
| 17943 | 1435304_at   | Region | Sod1          | 20655  | 16 | 89378174  | 89383756  | + |
| 17944 | 1448654_at   | Region | Mtch2         | 56428  | 2  | 90551904  | 90571383  | + |
| 17945 | 1457117_at   | Region | Nfe2l2        | 18024  | 2  | 75373265  | 75402331  | - |
| 17946 | 1452638_s_at | Region | Dnm1l         | 74006  | 16 | 15081722  | 15126600  | - |
| 17947 | 1429441_at   | Region | Fbxo30        | 71865  | 10 | 11158930  | 11174522  | + |
| 17948 | 1448514_at   | Region | Cox5b         | 12859  | 1  | 36986129  | 36987976  | + |
| 17949 | 1446164_at   | Region | Ncoa6ip       | 116940 | 4  | 3502044   | 3543770   | + |
| 17950 | 1441913_at   | Region | Luzp2         | 233271 | 7  | 49005909  | 49477620  | + |
| 17951 | 1442652_at   | Region | ---           | 242037 | 3  | 57285949  | 57326058  | - |
| 17952 | 1425624_at   | Region | Epm2aip1      | 77781  | 9  | 111313226 | 111320386 | + |
| 17953 | 1453529_at   | Region | 6330418B08Rik | 70745  | 1  | 174994661 | 174997616 | - |
| 17954 | 1423869_s_at | Region | Txnrd3        | 232223 | 6  | 90079638  | 90111154  | + |
| 17955 | 1418985_at   | Region | BC003236      | 80281  | 3  | 104796431 | 104845993 | - |
| 17956 | 1441241_at   | Region | 9630013D21Rik | 319743 | 4  | 108611339 | 108616732 | - |
|       |              |        | Rps17 ///     |        |    |           |           |   |
| 17957 | 1438502_x_at | Region | LOC383032     | 20068  | 7  | 75150291  | 75152774  | - |
| 17958 | 1456060_at   | Region | Maf           | 17132  | 8  | 115016686 | 115019625 | - |
| 17959 | 1452219_at   | Region | BC026370      | 224807 | 17 | 43170690  | 43196864  | - |
| 17960 | 1449821_a_at | Region | 0610016J10Rik | 76890  | 11 | 72006473  | 72064344  | - |
| 17961 | 1460177_at   | Region | Cndp2         | 66054  | 18 | 84835201  | 84853374  | - |
| 17962 | 1416356_at   | Region | Gmpr2         | 105446 | 14 | 50190251  | 50197215  | + |
| 17963 | 1415941_s_at | Region | AA407930      | 100494 | 5  | 138468708 | 138481909 | - |

|       |              |        |               |        |    |           |           |   |
|-------|--------------|--------|---------------|--------|----|-----------|-----------|---|
| 17964 | 1425801_x_at | Region | Cotl1         | 72042  | 8  | 119165392 | 119197206 | - |
| 17965 | 1457230_at   | Region | Gnpda2        | 67980  | 5  | 68341941  | 68359622  | - |
| 17966 | 1442760_x_at | Region | Rtn4          | 68585  | 11 | 29587737  | 29637706  | + |
| 17967 | 1454877_at   | Region | Sertad4       | 214791 | 1  | 192583252 | 192594485 | - |
| 17968 | 1421298_a_at | Region | Hipk1         | 15257  | 3  | 103171062 | 103218570 | - |
| 17969 | 1418235_at   | Region | Atg5l         | 11793  | 10 | 44383463  | 44478754  | + |
| 17970 | 1434180_at   | Region | Plekhc1       | 218952 | 14 | 40537053  | 40545664  | - |
| 17971 | 1436391_s_at | Region | MGI:2385186   | 229725 | 3  | 108449989 | 108473754 | + |
| 17972 | 1456874_at   | Region | Flrt2         | 399558 | 12 | 91102888  | 91191660  | + |
| 17973 | 1436730_at   | Region | MGI:2385186   | 229725 | 3  | 108449989 | 108473754 | + |
| 17974 | 1418330_at   | Region | Ctcf          | 13018  | 8  | 104932169 | 104978643 | + |
| 17975 | 1426381_at   | Region | Pprc1         | 226169 | 19 | 45603729  | 45620082  | + |
| 17976 | 1428659_at   | Region | Phf7          | 71838  | 14 | 29369534  | 29383056  | - |
| 17977 | 1452904_at   | Region | 1700026L06Rik | 69987  | 2  | 28624242  | 28631813  | - |
| 17978 | 1423502_at   | Region | Brd2          | 14312  | 17 | 31817639  | 31824919  | - |
| 17979 | 1450183_a_at | Region | Lnk           | 16923  | 5  | 120969565 | 120989151 | - |
| 17980 | 1446006_at   | Region | 1500034J20Rik | 66541  | 2  | 105609439 | 105671940 | + |
| 17981 | 1418023_at   | Region | Narg1         | 74838  | 3  | 51048093  | 51105995  | + |
| 17982 | 1423486_at   | Region | 1200020A08Rik | 56724  | 17 | 84882400  | 84892614  | + |
| 17983 | 1460519_a_at | Region | Mettl5        | 75422  | 2  | 69733938  | 69741002  | - |
| 17984 | 1425166_at   | Region | Rbl1          | 19650  | 2  | 156602867 | 156661488 | - |
| 17985 | 1449507_a_at | Region | Cd47          | 16423  | 16 | 48697237  | 48753271  | + |
| 17986 | 1460063_at   | Region | D5Erd798e     | 52409  | 5  | 44528855  | 44530831  | - |
| 17987 | 1453541_at   | Region | Pfkl          | 18641  | 10 | 78096466  | 78119117  | - |
| 17988 | 1452323_at   | Region | BC008150      | 223918 | 15 | 102175888 | 102196929 | - |
| 17989 | 1455809_x_at | Region | AI114950      | 101489 | 7  | 135259333 | 135265613 | + |
| 17990 | 1439734_at   | Region | Mmp15         | 17388  | 8  | 94636817  | 94655679  | + |
| 17991 | 1419402_at   | Region | Mns1          | 17427  | 9  | 72562062  | 72591224  | + |
| 17992 | 1428546_at   | Region | Syncrip       | 56403  | 9  | 88814754  | 88842894  | - |
| 17993 | 1456317_at   | Region | 1700055N04Rik | 73458  | 19 | 3759421   | 3769982   | + |
| 17994 | 1448994_at   | Region | Sp1           | 20683  | 15 | 102466747 | 102493098 | + |
| 17995 | 1459783_s_at | Region | Cno           | 117197 | 5  | 35253726  | 35255215  | - |
| 17996 | 1428951_at   | Region | Nol8          | 70930  | 13 | 49249941  | 49275842  | + |
| 17997 | 1460736_at   | Region | AF013969      | 100563 | 5  | 40543493  | 40600266  | - |
| 17998 | 1450647_at   | Region | Hps3          | 12807  | 3  | 19337225  | 19376554  | - |
| 17999 | 1439425_x_at | Region | BC024814      | 239706 | 16 | 8144106   | 8163490   | + |
| 18000 | 1420132_s_at | Region | Pttg1ip       | 108705 | 10 | 77693207  | 77710168  | + |
| 18001 | 1431028_a_at | Region | Pank1         | 75735  | 19 | 34154273  | 34221296  | - |
| 18002 | 1451436_at   | Region | Sbno1         | 243272 | 5  | 123544504 | 123597297 | - |
| 18003 | 1428564_at   | Region | Zfp579        | 68490  | 7  | 4239821   | 4241149   | - |
| 18004 | 1448634_at   | Region | Ralbp1        | 19765  | 17 | 63557880  | 63594264  | - |
| 18005 | 1449915_at   | Region | Zfp202        | 80902  | 9  | 40142614  | 40163478  | + |
| 18006 | 1424574_at   | Region | Tmed5         | 73130  | 5  | 107193657 | 107204601 | - |
| 18007 | 1452434_s_at | Region | Dgcr6         | 13353  | 16 | 16823817  | 16842299  | + |
| 18008 | 1423461_a_at | Region | Ubl3          | 24109  | 5  | 147397249 | 147446449 | - |
| 18009 | 1419182_at   | Region | Svep1         | 64817  | 4  | 57986245  | 58150045  | - |
| 18010 | 1439205_at   | Region | AI607462      | 99036  | 2  | 167985145 | 167985705 | - |
| 18011 | 1455362_at   | Region | D1Erd396e     | 52477  | 1  | 190665121 | 190682759 | + |
| 18012 | 1453461_at   | Region | Fxc1          | 14356  | 7  | 99755452  | 99756758  | + |
| 18013 | 1447187_at   | Region | Ripk5         | 213452 | 1  | 132274936 | 132320783 | + |
| 18014 | 1425921_a_at | Region | 1810055G02Rik | 72056  | 19 | 3497123   | 3506671   | + |
| 18015 | 1435158_at   | Region | 3000004N20Rik | 72397  | 4  | 12067282  | 12073696  | + |
| 18016 | 1437329_at   | Region | Ptplb         | 70757  | 16 | 33805502  | 33889652  | + |
| 18017 | 1432372_a_at | Region | Spr           | 20751  | 6  | 85483272  | 85487405  | - |
| 18018 | 1415734_at   | Region | Rab7          | 19349  | 6  | 88435785  | 88481888  | - |
| 18019 | 1445225_at   | Region | 5730427M17Rik | 98814  | 2  | 171960155 | 171960750 | + |
| 18020 | 1431809_at   | Region | 4932442L08Rik | 74432  | X  | 89015709  | 89027435  | - |
| 18021 | 1420489_at   | Region | Mrps14        | 64659  | 1  | 160099907 | 160105833 | + |
| 18022 | 1424509_at   | Region | 1190003K14Rik | 68891  | 7  | 19898555  | 19937469  | + |
| 18023 | 1449065_at   | Region | Cte1          | 26897  | 12 | 80873838  | 80882079  | + |
| 18024 | 1458043_at   | Region | Btbd9         | 224671 | 17 | 28030141  | 28340405  | - |
| 18025 | 1438591_at   | Region | 2610019A05Rik | 72149  | 11 | 105984425 | 106014637 | - |
| 18026 | 1440343_at   | Region | Rps6ka5       | 73086  | 12 | 95995143  | 96170417  | - |
| 18027 | 1456986_at   | Region | Zbtb16        | 235320 | 9  | 48684510  | 48863820  | - |
| 18028 | 1417197_at   | Region | D8Erd594e     | 52357  | 8  | 46797192  | 46960652  | - |

|       |              |        |                   |        |      |           |           |      |
|-------|--------------|--------|-------------------|--------|------|-----------|-----------|------|
| 18029 | 1442027_at   | Region | LOC545323         | 545323 | 1    | 60484054  | 60635087  | +    |
| 18030 | 1419190_at   | Region | Vti1a             | 53611  | 19   | 54896591  | 55207543  | +    |
| 18031 | 1424430_at   | Region | Mterfd2           | 69821  | 1    | 93126702  | 93133361  | -    |
| 18032 | 1459149_at   | Region | None              | None   | 9    | 22136646  | 22137072  | +    |
| 18033 | 1426870_at   | Region | Fbxo33            | 70611  | 12   | 55933702  | 55953036  | -    |
| 18034 | 1417966_at   | Region | Mrpl39            | 27393  | 16   | 83827402  | 83845155  | -    |
| 18035 | 1446474_at   | Region | ---               | 433759 | 4    | 128543217 | 128569759 | -    |
| 18036 | 1460450_at   | Region | E230022H04Rik     | 225339 | 18   | 32000024  | 32022887  | +    |
| 18037 | 1449895_at   | Region | Acr               | 11434  | 15   | 89621235  | 89627301  | +    |
| 18038 | 1419466_at   | Region | Nkd2              | 72293  | 13   | 69880109  | 69907684  | -    |
| 18039 | 1436005_at   | Region | Sfrs14            | 234373 | 8    | 69387208  | 69416080  | +    |
| 18040 | 1424243_at   | Region | BC016198          | 192174 | 8    | 46500251  | 46519367  | +    |
| 18041 | 1426847_at   | Region | Sirt4             | 75387  | 5    | 114591018 | 114605341 | -    |
| 18042 | 1456586_x_at | Region | Mvp               | 78388  | 7    | 121036597 | 121064325 | -    |
| 18043 | 1429727_at   | Region | Slc16a9           | 66859  | 10   | 70299424  | 70340099  | +    |
| 18044 | 1416922_a_at | Region | Bnip3l            | 12177  | 14   | 61515922  | 61539638  | -    |
| 18045 | 1427156_s_at | Region | Ascc2             | 75452  | 11   | 4532580   | 4578172   | +    |
| 18046 | 1431929_a_at | Region | Stx17             | 67727  | 4    | 48040852  | 48099039  | +    |
| 18047 | 1449894_at   | Region | 4930442L21Rik     | 67580  | 14   | 31128052  | 31151879  | +    |
| 18048 | 1436427_at   | Region | Prpf4b            | 19134  | 13   | 34407672  | 34435208  | +    |
| 18049 | 1416347_at   | Region | Men1              | 17283  | 19   | 6123829   | 6129679   | +    |
| 18050 | 1460324_at   | Region | Dnmt3a            | 13435  | 12   | 3001834   | 3066656   | +    |
| 18051 | 1433590_at   | Region | Herc3             | 73998  | 6    | 58996163  | 59083005  | +    |
| 18052 | 1458877_at   | Region | None              | None   | 3    | 80404755  | 80405419  | -    |
| 18053 | 1419765_at   | Region | Cul2              | 71745  | 18   | 3387735   | 3440960   | +    |
| 18054 | 1449779_at   | Region | None              | None   | NONE | NONE      | NONE      | NONE |
| 18055 | 1452710_at   | Region | Rpusd4            | 71989  | 9    | 35181408  | 35189406  | +    |
| 18056 | 1449641_at   | Region | None              | None   | 14   | 19682793  | 19691460  | +    |
| 18057 | 1420772_a_at | Region | Tsc22d3           | 14605  | X    | 134084467 | 134088106 | -    |
| 18058 | 1441131_at   | Region | None              | None   | 5    | 146390002 | 146390634 | +    |
| 18059 | 1420930_s_at | Region | Ctnnal1           | 54366  | 4    | 56754384  | 56808637  | -    |
| 18060 | 1428855_at   | Region | H13               | 14950  | 2    | 152126435 | 152163760 | +    |
| 18061 | 1436906_at   | Region | Rnf166            | 68718  | 8    | 121847734 | 121858060 | -    |
| 18062 | 1427018_at   | Region | Tsnaxip1          | 72236  | 8    | 105123588 | 105140520 | +    |
| 18063 | 1455901_at   | Region | Chpt1             | 212862 | 10   | 88445367  | 88476119  | -    |
| 18064 | 1425961_at   | Region | BC016548          | 211039 | 2    | 103088733 | 103093796 | -    |
| 18065 | 1419271_at   | Region | Pax6              | 18508  | 2    | 105381199 | 105401823 | +    |
| 18066 | 1442221_at   | Region | Gnefr             | 27414  | 7    | 40528521  | 40725138  | -    |
| 18067 | 1437737_at   | Region | AV340375          | 213550 | 9    | 64429200  | 64463381  | -    |
| 18068 | 1418569_at   | Region | Fblim1            | 74202  | 4    | 140458190 | 140477211 | -    |
| 18069 | 1441869_x_at | Region | Auts2             | 319974 | 5    | 130627794 | 130728707 | -    |
| 18070 | 1445877_at   | Region | None              | None   | 13   | 72058644  | 72059366  | -    |
| 18071 | 1420796_at   | Region | Ahrr              | 11624  | 13   | 70273194  | 70354514  | -    |
| 18072 | 1431334_a_at | Region | 4933433P14Rik     | 66787  | 12   | 101145518 | 101150041 | +    |
| 18073 | 1458747_at   | Region | Fbxo45            | 268882 | 16   | 31039483  | 31056396  | -    |
| 18074 | 1452694_at   | Region | lhpk1             | 27399  | 9    | 108070635 | 108116769 | +    |
| 18075 | 1459321_at   | Region | None              | None   | 1    | 130319002 | 130319663 | +    |
| 18076 | 1425465_a_at | Region | Senp2             | 75826  | 16   | 20782192  | 20820660  | +    |
| 18077 | 1433041_at   | Region | Rabepk            | 227746 | 2    | 34710828  | 34731953  | -    |
| 18078 | 1429930_at   | Region | Ccdc19            | 71870  | 1    | 172450058 | 172474789 | +    |
| 18079 | 1425713_a_at | Region | Rnf146            | 68031  | 10   | 29378124  | 29394428  | -    |
| 18080 | 1443819_x_at | Region | Ttc11             | 66437  | 5    | 135975208 | 135979354 | +    |
| 18081 | 1420804_s_at | Region | Clec4d            | 17474  | 6    | 123929332 | 123942075 | +    |
| 18082 | 1422912_at   | Region | Bmp4              | 12159  | 14   | 41463739  | 41467068  | -    |
| 18083 | 1437756_at   | Region | Gimap9            | 317758 | 6    | 48809017  | 48811587  | +    |
| 18084 | 1422461_at   | Region | Atad3a            | 108888 | 4    | 154233003 | 154253455 | -    |
| 18085 | 1453322_at   | Region | Wdr33             | 74320  | 18   | 32067429  | 32147139  | +    |
| 18086 | 1424804_at   | Region | BC020002          | 252875 | 6    | 8183603   | 8211482   | +    |
|       |              |        | 5830467E07Rik /// |        |      |           |           |      |
| 18087 | 1453358_s_at | Region | C730024G19Rik     | 232566 | 6    | 150093461 | 150124565 | -    |
| 18088 | 1458548_at   | Region | None              | None   | 4    | 3801782   | 3802329   | -    |
| 18089 | 1434977_at   | Region | 4933403F05Rik     | 108654 | 18   | 68497464  | 68531006  | -    |
| 18090 | 1426840_at   | Region | Ythdf3            | 229096 | 3    | 15522868  | 15556473  | +    |
| 18091 | 1442643_at   | Region | Jmjd3             | 216850 | 11   | 69128612  | 69129226  | -    |
| 18092 | 1423953_at   | Region | Cdkal1            | 68916  | 13   | 28804928  | 29335210  | -    |

|       |              |        |               |        |    |           |           |   |
|-------|--------------|--------|---------------|--------|----|-----------|-----------|---|
| 18093 | 1446321_at   | Region | B230208B08Rik | 319499 | 4  | 77275097  | 77275770  | + |
| 18094 | 1423299_at   | Region | Txn1          | 53382  | 18 | 63894960  | 63924518  | - |
| 18095 | 1422012_at   | Region | Crhr2         | 12922  | 6  | 55234412  | 55277297  | - |
| 18096 | 1435001_at   | Region | Plaa          | 18786  | 4  | 93544242  | 93578250  | - |
| 18097 | 1421854_at   | Region | Fgl2          | 14190  | 5  | 19824807  | 19830476  | + |
| 18098 | 1454290_at   | Region | 4930573O21Rik | 114670 | 9  | 3072735   | 3074305   | + |
| 18099 | 1426846_at   | Region | G630055P03Rik | 320394 | 8  | 105140522 | 105147852 | - |
| 18100 | 1448795_a_at | Region | Tbrg4         | 21379  | 11 | 6511211   | 6520811   | - |
| 18101 | 1456112_at   | Region | Tpr           | 108989 | 1  | 150229615 | 150286691 | + |
| 18102 | 1436550_at   | Region | Fbxo30        | 71865  | 10 | 11158930  | 11174522  | + |
| 18103 | 1451136_a_at | Region | Eif2b2        | 217715 | 12 | 82088696  | 82095811  | + |
| 18104 | 1437543_at   | Region | Fubp1         | 51886  | 3  | 151191900 | 151214173 | + |
| 18105 | 1418095_at   | Region | Smpx          | 66106  | X  | 151298523 | 151351994 | + |
| 18106 | 1425319_s_at | Region | 6530403A03Rik | 67797  | 13 | 37743845  | 37765948  | + |
| 18107 | 1424267_at   | Region | 1810043G02Rik | 67884  | 10 | 78087790  | 78093995  | + |
| 18108 | 1434989_at   | Region | A030001O10Rik | 503691 | 1  | 66990410  | 66991529  | + |
| 18109 | 1447931_at   | Region | Whsc11        | 234135 | 8  | 24322608  | 24439465  | + |
| 18110 | 1424998_at   | Region | Emr4          | 52614  | 17 | 53388173  | 53491657  | + |
| 18111 | 1450510_a_at | Region | None          | None   | 8  | 83678710  | 83904625  | + |
| 18112 | 1440082_at   | Region | Ptk2          | 14083  | 15 | 73233486  | 73423105  | - |
| 18113 | 1438065_at   | Region | BC021395      | 225283 | 18 | 24716439  | 24758615  | - |
| 18114 | 1417767_at   | Region | 1810044O22Rik | 66427  | 8  | 106448348 | 106485157 | + |
| 18115 | 1429213_at   | Region | 2310030N02Rik | 76947  | 4  | 10978015  | 11025490  | - |
| 18116 | 1446590_at   | Region | None          | None   | 7  | 101351774 | 101352419 | + |
| 18117 | 1453863_at   | Region | 3300002P09Rik | 70246  | 10 | 80531466  | 80532223  | + |
| 18118 | 1423632_at   | Region | Gpr146        | 80290  | 5  | 138378137 | 138391571 | + |
| 18119 | 1433937_at   | Region | Trp53bp2      | 209456 | 1  | 182387965 | 182421393 | + |

Bcl2a1a /// Bcl2a1b

|       |              |        |               |        |    |           |           |   |
|-------|--------------|--------|---------------|--------|----|-----------|-----------|---|
| 18120 | 1419004_s_at | Region | /// Bcl2a1d   | 12044  | 9  | 89087713  | 89096373  | + |
| 18121 | 1458640_at   | Region | None          | None   | 13 | 74232685  | 74233184  | + |
| 18122 | 1438058_s_at | Region | Ptov1         | 84113  | 7  | 38938217  | 38944997  | - |
| 18123 | 1453776_at   | Region | 5730407K14Rik | 101113 | 2  | 164242750 | 164244365 | + |
| 18124 | 1418680_at   | Region | Serpind1      | 15160  | 16 | 16102383  | 16114540  | + |
| 18125 | 1428037_at   | Region | Otoa          | 246190 | 7  | 114959005 | 115038655 | + |
| 18126 | 1428235_at   | Region | Sdhd          | 66925  | 9  | 50668672  | 50676143  | - |
| 18127 | 1455765_a_at | Region | Abcc8         | 20927  | 7  | 40189876  | 40191508  | - |
| 18128 | 1456274_at   | Region | C230071H18Rik | 399569 | 2  | 92895734  | 92898091  | + |
| 18129 | 1435440_at   | Region | Pdzk8         | 107368 | 19 | 58896247  | 58899785  | - |
| 18130 | 1417980_a_at | Region | Insig2        | 72999  | 1  | 121067561 | 121095788 | - |
| 18131 | 1459910_at   | Region | Tnks          | 21951  | 8  | 33630639  | 33689219  | - |
| 18132 | 1445861_at   | Region | Usp25         | 30940  | 16 | 76100019  | 76202730  | + |
| 18133 | 1456303_at   | Region | None          | None   | 6  | 12005918  | 12006184  | + |
| 18134 | 1450484_a_at | Region | Tyki          | 22169  | 12 | 23014305  | 23024800  | + |
| 18135 | 1440277_at   | Region | AU041474      | 99229  | 2  | 181250091 | 181250809 | + |
| 18136 | 1445108_at   | Region | Lphn3         | 319387 | 5  | 80275281  | 81049432  | + |
| 18137 | 1451604_a_at | Region | Acvr1         | 11482  | 15 | 101186060 | 101201176 | + |
| 18138 | 1424571_at   | Region | Ddx46         | 212880 | 13 | 54268652  | 54296831  | + |
| 18139 | 1422938_at   | Region | Bcl2          | 12043  | 1  | 106479000 | 106655083 | - |
| 18140 | 1428360_x_at | Region | Ndufa7        | 66416  | 17 | 31523009  | 31536811  | + |
| 18141 | 1432852_at   | Region | Phactr1       | 218194 | 13 | 42242828  | 42700966  | + |
| 18142 | 1454842_a_at | Region | B3galnt2      | 97884  | 13 | 13397005  | 13441487  | + |
| 18143 | 1450509_at   | Region | Chst11        | 58250  | 10 | 82872541  | 83080006  | + |
| 18144 | 1458028_at   | Region | None          | None   | 11 | 78571764  | 78572530  | + |
| 18145 | 1437715_x_at | Region | Apex1         | 11792  | 14 | 46019661  | 46021778  | + |
| 18146 | 1445200_at   | Region | None          | None   | 14 | 115621774 | 115622195 | + |
| 18147 | 1452466_a_at | Region | Rbm6          | 19654  | 9  | 107841550 | 107940685 | - |
| 18148 | 1439813_at   | Region | Sspl3         | 74585  | 5  | 114199863 | 114200682 | + |
| 18149 | 1438890_at   | Region | Fbxl11        | 225876 | 19 | 4106596   | 4187056   | - |
| 18150 | 1450580_at   | Region | Gpr45         | 93690  | 1  | 43247681  | 43330167  | + |
| 18151 | 1420774_a_at | Region | 4930583H14Rik | 67749  | 3  | 51020380  | 51028473  | - |
| 18152 | 1441306_at   | Region | 6820408C15Rik | 228778 | 2  | 151872523 | 151901264 | + |
| 18153 | 1457745_at   | Region | Gpr4          | 319197 | 7  | 16090199  | 16092985  | + |
| 18154 | 1426316_at   | Region | 6330416G13Rik | 230279 | 4  | 62651547  | 62677546  | + |
| 18155 | 1448619_at   | Region | Dhcr7         | 13360  | 7  | 138237063 | 138262306 | + |

|       |              |        |                    |        |      |           |           |      |
|-------|--------------|--------|--------------------|--------|------|-----------|-----------|------|
| 18156 | 1440404_at   | Region | None               | None   | 17   | 6066727   | 6067437   | +    |
| 18157 | 1444107_at   | Region | C130039O16Rik      | 238317 | 12   | 81016718  | 81058346  | -    |
| 18158 | 1418347_at   | Region | DXImx40e           | 54638  | X    | 5832751   | 5844332   | -    |
| 18159 | 1439350_s_at | Region | Cdc911l            | 228812 | 2    | 154735189 | 154814361 | -    |
| 18160 | 1436347_a_at | Region | 5530601H04Rik      | 71445  | X    | 99638560  | 99671489  | -    |
| 18161 | 1437208_at   | Region | 38605              | 103080 | 10   | 59120943  | 59121745  | -    |
| 18162 | 1441444_at   | Region | None               | None   | 1    | 60532662  | 60533359  | +    |
| 18163 | 1429728_at   | Region | 4930429M06Rik      | 252876 | 1    | 97550286  | 97573055  | +    |
| 18164 | 1442570_at   | Region | Zmym1              | 68310  | 4    | 126074207 | 126088245 | -    |
| 18165 | 1426908_at   | Region | Galnt7             | 108150 | 8    | 56563802  | 56692236  | -    |
| 18166 | 1452809_at   | Region | 9030607L17Rik      | 71564  | 10   | 80834056  | 80837087  | +    |
| 18167 | 1443535_at   | Region | Gpr21              | 338346 | 2    | 37448788  | 37451445  | +    |
| 18168 | 1418222_at   | Region | 2610024G14Rik      | 56412  | 5    | 76538496  | 76554303  | -    |
| 18169 | 1455598_at   | Region | Usp30              | 100756 | 5    | 113210959 | 113234147 | +    |
| 18170 | 1418863_at   | Region | Gata4              | 14463  | 14   | 57729513  | 57775851  | -    |
| 18171 | 1443598_at   | Region | None               | None   | NONE | NONE      | NONE      | NONE |
| 18172 | 1449371_at   | Region | Harsl              | 70791  | 18   | 37007045  | 37016327  | +    |
| 18173 | 1430902_at   | Region | Ankrd24            | 70615  | 10   | 81777736  | 81784518  | +    |
| 18174 | 1452855_at   | Region | Ly6k               | 76486  | 15   | 74828518  | 74831524  | -    |
| 18175 | 1449144_at   | Region | Gna11              | 14672  | 10   | 81666416  | 81680827  | -    |
| 18176 | 1449180_at   | Region | Kcmf1              | 74287  | 6    | 73177405  | 73198187  | -    |
| 18177 | 1419945_s_at | Region | Rab2               | 59021  | 4    | 8462790   | 8534848   | +    |
| 18178 | 1441632_at   | Region | C130079B09Rik      | 399637 | 15   | 73429144  | 73429771  | -    |
| 18179 | 1451532_s_at | Region | Steap              | 70358  | 5    | 5742327   | 5755316   | -    |
| 18180 | 1457301_at   | Region | AI931714           | 102182 | 8    | 76707830  | 76793401  | +    |
| 18181 | 1422277_at   | Region | Gira1              | 14654  | 11   | 55267654  | 55360631  | -    |
| 18182 | 1431032_at   | Region | Agl                | 77559  | 3    | 115512007 | 115576987 | -    |
| 18183 | 1433558_at   | Region | Dab2ip             | 69601  | 2    | 35624156  | 35663154  | +    |
| 18184 | 1447016_at   | Region | Tbc1d1             | 57915  | 5    | 62958072  | 63146849  | +    |
| 18185 | 1435833_at   | Region | None               | None   | 6    | 115679812 | 115680524 | -    |
| 18186 | 1451279_at   | Region | Rab6ip2            | 111173 | 6    | 120007511 | 120280559 | -    |
| 18187 | 1450710_at   | Region | Jarid2             | 16468  | 13   | 44305547  | 44495137  | +    |
| 18188 | 1423137_at   | Region | Rala               | 56044  | 13   | 17345050  | 17361579  | -    |
| 18189 | 1455405_at   | Region | Pstpip2            | 19201  | 18   | 77916484  | 78001401  | +    |
| 18190 | 1454581_at   | Region | 5330425B07Rik      | 77063  | 3    | 114918688 | 114919717 | +    |
| 18191 | 1441842_s_at | Region | 1500031N24Rik      | 69020  | 15   | 76010507  | 76025834  | +    |
| 18192 | 1447503_at   | Region | BC016495           | 225994 | 19   | 17878968  | 17899143  | +    |
| 18193 | 1418241_at   | Region | Usf2               | 22282  | 7    | 26353591  | 26364359  | -    |
| 18194 | 1452310_at   | Region | Tada2l             | 217031 | 11   | 83806912  | 83857560  | -    |
| 18195 | 1440826_s_at | Region | 2610002I17Rik      | 72341  | 9    | 110345158 | 110362186 | +    |
| 18196 | 1420637_at   | Region | Prps2              | 110639 | X    | 160945738 | 160982104 | -    |
| 18197 | 1439099_at   | Region | ---                | 384569 | 7    | 15811241  | 15826525  | +    |
| 18198 | 1423375_at   | Region | 1700023B02Rik      | 66935  | 2    | 72981621  | 73010252  | -    |
| 18199 | 1453198_at   | Region | MGI:3028594        | 77652  | 17   | 30988427  | 31006091  | +    |
| 18200 | 1432489_a_at | Region | 2410187C16Rik      | 76773  | 15   | 58150452  | 58167670  | +    |
| 18201 | 1429811_at   | Region | 4933424B01Rik      | 71177  | 6    | 147470322 | 147498449 | -    |
| 18202 | 1440659_at   | Region | 2610027L16Rik      | 67842  | 14   | 50263729  | 50272080  | +    |
| 18203 | 1437241_at   | Region | Tieg3              | 194655 | 12   | 21201029  | 21212430  | +    |
| 18204 | 1424956_at   | Region | D030015G18Rik      | 230793 | 4    | 131972405 | 132038141 | +    |
| 18205 | 1417512_at   | Region | Evi5 /// LOC544746 | 14020  | 5    | 106815244 | 106945556 | -    |
| 18206 | 1454870_x_at | Region | Gpr172b            | 52710  | 15   | 76589887  | 76593074  | +    |
| 18207 | 1420488_at   | Region | Mrps14             | 64659  | 1    | 160099907 | 160105833 | +    |
| 18208 | 1419547_at   | Region | Fahd1              | 68636  | 17   | 22654316  | 22655550  | -    |
| 18209 | 1443592_at   | Region | AA617406           | 98819  | 2    | 164337673 | 164338034 | +    |
| 18210 | 1448843_at   | Region | Ssr1               | 107513 | 13   | 37516882  | 37533029  | -    |
| 18211 | 1440595_at   | Region | Epb4.1l3           | 13823  | 17   | 66934864  | 67065569  | +    |
| 18212 | 1458150_at   | Region | D030051N19Rik      | 228361 | 2    | 91434974  | 91623598  | +    |
| 18213 | 1425944_a_at | Region | Rad51l3            | 19364  | 11   | 82614373  | 82630248  | -    |
| 18214 | 1416945_at   | Region | Ptov1              | 84113  | 7    | 38938217  | 38944997  | -    |
| 18215 | 1425511_at   | Region | Mark1              | 226778 | 1    | 184396055 | 184497931 | -    |
| 18216 | 1425016_at   | Region | Ephb2              | 13844  | 4    | 135534865 | 135717192 | -    |
| 18217 | 1458299_s_at | Region | Nfkbie             | 18037  | 17   | 43066249  | 43074099  | +    |
| 18218 | 1440608_at   | Region | None               | None   | 13   | 22921886  | 22922393  | -    |
| 18219 | 1416032_at   | Region | 1110006I15Rik      | 68539  | 19   | 10067157  | 10078240  | -    |



|       |              |        |               |        |      |           |           |      |
|-------|--------------|--------|---------------|--------|------|-----------|-----------|------|
| 18220 | 1422959_s_at | Region | Zfp313        | 81018  | 2    | 166949378 | 166972899 | +    |
| 18221 | 1438336_at   | Region | Fbxw11        | 103583 | 11   | 32537669  | 32641610  | +    |
| 18222 | 1417417_a_at | Region | Cox6a1        | 12861  | 5    | 114456220 | 114459517 | -    |
| 18223 | 1455679_at   | Region | 5830411E10Rik | 109019 | 1    | 51769634  | 51779343  | -    |
| 18224 | 1454897_at   | Region | 6330509M05Rik | 102913 | X    | 18337839  | 18339212  | -    |
| 18225 | 1459411_at   | Region | Sdccag10      | 67285  | 13   | 100849082 | 101034691 | -    |
| 18226 | 1428856_at   | Region | H13           | 14950  | 2    | 152126435 | 152163760 | +    |
| 18227 | 1429435_x_at | Region | Pik3ca        | 18706  | 3    | 31844384  | 31871009  | +    |
| 18228 | 1421387_at   | Region | Kremen1       | 84035  | 11   | 5086339   | 5156397   | -    |
| 18229 | 1453009_at   | Region | Cpm           | 70574  | 10   | 117346301 | 117376298 | +    |
| 18230 | 1418827_at   | Region | Thex1         | 67276  | 8    | 34268325  | 34298553  | -    |
| 18231 | 1448671_at   | Region | Ube2e3        | 22193  | 2    | 78566796  | 78618332  | +    |
| 18232 | 1459396_at   | Region | 6030446N20Rik | 338363 | 18   | 12168904  | 12309081  | -    |
| 18233 | 1443263_at   | Region | E030004N02Rik | 319905 | 4    | 32819009  | 32819665  | +    |
| 18234 | 1444412_at   | Region | Aim1          | 11630  | 10   | 44071674  | 44072380  | -    |
| 18235 | 1428168_at   | Region | Mpzl1         | 68481  | 1    | 165514161 | 165556442 | -    |
| 18236 | 1440872_at   | Region | None          | None   | 13   | 48509128  | 48509859  | -    |
| 18237 | 1429959_at   | Region | None          | None   | 16   | 90570636  | 90572050  | +    |
| 18238 | 1439900_at   | Region | None          | None   | 14   | 49577473  | 49578502  | -    |
| 18239 | 1437909_at   | Region | D030022P06Rik | 338353 | 7    | 121609117 | 121614997 | +    |
| 18240 | 1455980_a_at | Region | Gas2l3        | 237436 | 10   | 89385653  | 89416830  | -    |
| 18241 | 1457678_at   | Region | 2310035C23Rik | 227446 | 1    | 105555177 | 105695178 | +    |
| 18242 | 1418707_at   | Region | Bag4          | 67384  | 8    | 24492266  | 24510265  | -    |
| 18243 | 1425087_at   | Region | 2310003F16Rik | 67693  | 2    | 120970950 | 120972288 | +    |
| 18244 | 1415763_a_at | Region | None          | None   | 4    | 128627781 | 128635642 | +    |
| 18245 | 1419975_at   | Region | None          | None   | 4    | 107002747 | 107003340 | +    |
| 18246 | 1417016_at   | Region | Mapkapk5      | 17165  | 5    | 120676857 | 120697697 | -    |
| 18247 | 1420372_at   | Region | Sntb2         | 20650  | 8    | 106233437 | 106311879 | +    |
| 18248 | 1438907_at   | Region | None          | None   | NONE | NONE      | NONE      | NONE |
| 18249 | 1434524_at   | Region | Eif2b3        | 108067 | 4    | 116000045 | 116047677 | +    |
| 18250 | 1432746_at   | Region | 6030442H21Rik | 77070  | 2    | 64872641  | 64873910  | -    |
| 18251 | 1424208_at   | Region | Ptger4        | 19219  | 15   | 5019431   | 5029397   | -    |
| 18252 | 1452123_s_at | Region | Frm�4b        | 232288 | 6    | 97752751  | 97993840  | -    |
| 18253 | 1453245_at   | Region | 9130024F11Rik | 78900  | 1    | 57272992  | 57276039  | +    |
| 18254 | 1439565_at   | Region | AW492303      | 103035 | X    | 90021677  | 90022540  | -    |
| 18255 | 1457369_at   | Region | Phactr4       | 100169 | 4    | 131116497 | 131182926 | -    |
| 18256 | 1431204_at   | Region | 4930578N16Rik | 75051  | 2    | 69613434  | 69644977  | -    |
| 18257 | 1439879_at   | Region | LOC243905     | 243905 | 7    | 25398672  | 25442460  | +    |
| 18258 | 1418717_at   | Region | Mrps25        | 64658  | 6    | 92621555  | 92631448  | -    |
| 18259 | 1446160_x_at | Region | A630048M13Rik | 230657 | 4    | 115510433 | 115514832 | -    |
| 18260 | 1444952_a_at | Region | Nucks1        | 98415  | 1    | 131762351 | 131784790 | +    |
| 18261 | 1428176_at   | Region | Edg5          | 14739  | 9    | 20842557  | 20853293  | -    |
| 18262 | 1454655_at   | Region | Dgkd          | 227333 | 1    | 87696734  | 87764305  | +    |
| 18263 | 1455087_at   | Region | D7Ertđ715e    | 52480  | 7    | 53714049  | 53752237  | -    |
| 18264 | 1427936_at   | Region | Thns1         | 208967 | 2    | 21247734  | 21256386  | +    |
| 18265 | 1457861_at   | Region | A230009B12Rik | 319750 | 17   | 9096278   | 9113813   | +    |
| 18266 | 1423835_at   | Region | Zfp503        | 218820 | 14   | 20348630  | 20354269  | -    |
| 18267 | 1418191_at   | Region | Usp18         | 24110  | 6    | 121677931 | 121702891 | +    |
| 18268 | 1427945_at   | Region | Dpyd          | 99586  | 3    | 117335295 | 118207632 | +    |
| 18269 | 1454847_at   | Region | Lhfpl2        | 218454 | 13   | 90241860  | 90379474  | +    |
| 18270 | 1448488_at   | Region | Mrps5         | 77721  | 2    | 127101279 | 127117839 | +    |
| 18271 | 1418454_at   | Region | Mfap5         | 50530  | 6    | 123177943 | 123193877 | +    |
| 18272 | 1446877_at   | Region | None          | None   | NONE | NONE      | NONE      | NONE |
| 18273 | 1419809_s_at | Region | Cog4          | 102339 | 8    | 110144769 | 110179947 | +    |
| 18274 | 1423654_a_at | Region | Rnf4          | 19822  | 5    | 32824728  | 32841768  | +    |
| 18275 | 1443438_at   | Region | Ncoa1         | 17977  | 12   | 3409624   | 3575830   | -    |
| 18276 | 1443382_s_at | Region | None          | None   | 8    | 83945298  | 83945730  | -    |
| 18277 | 1418291_at   | Region | Zfp87         | 170763 | 13   | 64115135  | 64125488  | -    |
| 18278 | 1454631_at   | Region | 6330549H03Rik | 108667 | 12   | 86970768  | 86973492  | -    |
| 18279 | 1416277_a_at | Region | Rplp1         | 56040  | 9    | 62033165  | 62034420  | -    |
| 18280 | 1421819_a_at | Region | Set           | 56086  | 2    | 29994205  | 30003957  | +    |
| 18281 | 1434704_at   | Region | None          | None   | 5    | 21966120  | 21968134  | +    |
| 18282 | 1434238_at   | Region | None          | None   | 15   | 55017077  | 55018450  | -    |
| 18283 | 1450908_at   | Region | Eif4e         | 13684  | 3    | 137416519 | 137446834 | +    |
| 18284 | 1456723_at   | Region | BC006909      | 233895 | 7    | 121521345 | 121526489 | +    |

|       |              |        |               |        |    |           |           |   |
|-------|--------------|--------|---------------|--------|----|-----------|-----------|---|
| 18285 | 1440158_x_at | Region | None          | None   | 4  | 3878195   | 3878529   | + |
| 18286 | 1449932_at   | Region | Csnk1d        | 104318 | 11 | 120784515 | 120812412 | - |
| 18287 | 1446197_at   | Region | Lphn3         | 319387 | 5  | 80275281  | 81049432  | + |
| 18288 | 1437982_x_at | Region | Cox15         | 226139 | 19 | 43279531  | 43297387  | - |
| 18289 | 1416474_at   | Region | Nope          | 56741  | 9  | 65223736  | 65260207  | + |
| 18290 | 1439967_at   | Region | 1700071A11Rik | 76611  | 9  | 55260185  | 55260501  | - |
| 18291 | 1434168_at   | Region | Peo1          | 226153 | 19 | 44550964  | 44557168  | + |
| 18292 | 1460620_at   | Region | Zfp592        | 233410 | 7  | 74796384  | 74845397  | + |
| 18293 | 1416221_at   | Region | Fstl1         | 14314  | 16 | 36596522  | 36655983  | + |
| 18294 | 1452707_at   | Region | 4631423F02Rik | 70788  | 1  | 91174115  | 91185446  | + |
| 18295 | 1420054_s_at | Region | Slc35c2       | 228875 | 2  | 164733289 | 164744560 | - |
| 18296 | 1454935_at   | Region | D930001I22Rik | 228859 | 2  | 162925290 | 162929568 | - |
| 18297 | 1425059_at   | Region | Hrmt1I6       | 99890  | 3  | 110054499 | 110059366 | - |
| 18298 | 1419263_a_at | Region | Adrm1         | 56436  | 2  | 179888546 | 179893241 | + |
| 18299 | 1433125_at   | Region | 5330422M15Rik | 77062  | 4  | 149471005 | 149472085 | + |
| 18300 | 1455212_at   | Region | Wdr24         | 268933 | 17 | 23629877  | 23634885  | + |
| 18301 | 1452786_at   | Region | Trmt1         | 72026  | 15 | 85927970  | 85946036  | + |
| 18302 | 1434797_at   | Region | 6720469N11Rik | 320339 | 3  | 86823037  | 86823854  | - |
| 18303 | 1435277_x_at | Region | Nme1          | 18102  | 11 | 93780012  | 93789608  | - |
| 18304 | 1438183_x_at | Region | Sdh1          | 20322  | 2  | 121748692 | 121779190 | + |
| 18305 | 1452592_at   | Region | Mgst2         | 211666 | 3  | 51293201  | 51314729  | + |
| 18306 | 1419984_s_at | Region | Zfp644        | 52397  | 5  | 105678595 | 105758844 | - |
| 18307 | 1443757_x_at | Region | D1Erd161e     | 52231  | 1  | 75480104  | 75487168  | + |
| 18308 | 1453823_a_at | Region | A930028L21Rik | 229780 | 3  | 115354021 | 115363721 | - |
| 18309 | 1417320_at   | Region | Grpel1        | 17713  | 5  | 34952931  | 34961823  | + |
| 18310 | 1417237_at   | Region | Pld2          | 18806  | 11 | 70265822  | 70283768  | + |
| 18311 | 1460355_at   | Region | D030060M11Rik | 215051 | 9  | 46296268  | 46312116  | + |
| 18312 | 1447475_at   | Region | Gm967         | 381217 | 19 | 23211527  | 23268980  | - |
| 18313 | 1426497_at   | Region | Jarid1c       | 20591  | X  | 145767667 | 145808191 | + |
| 18314 | 1422648_at   | Region | Slc7a2        | 11988  | 8  | 39830084  | 39853621  | + |
| 18315 | 1449913_at   | Region | Zfp2          | 22678  | 11 | 50651553  | 50669006  | - |
| 18316 | 1418066_at   | Region | Cfl2          | 12632  | 12 | 51564268  | 51568328  | - |
| 18317 | 1460477_at   | Region | 1700010C24Rik | 70363  | 15 | 71476555  | 71493104  | - |
| 18318 | 1439386_x_at | Region | Mat2a         | 232087 | 6  | 72764773  | 72771532  | - |
| 18319 | 1438463_x_at | Region | Zdhhc6        | 66980  | 19 | 54859814  | 54896233  | - |
| 18320 | 1426526_s_at | Region | Ovgp1         | 12659  | 3  | 105769631 | 105783252 | + |
| 18321 | 1441624_at   | Region | 9430041O17Rik | 234214 | 8  | 44653046  | 44768456  | + |
| 18322 | 1431207_at   | Region | 2900024O10Rik | 72852  | 13 | 77784829  | 77786286  | + |
| 18323 | 1441572_at   | Region | C030036D22Rik | 77607  | 18 | 71487787  | 71488446  | - |
| 18324 | 1444828_at   | Region | Ppp2r5c       | 26931  | 12 | 105961123 | 106055786 | + |
| 18325 | 1451530_at   | Region | Egfr          | 13649  | 11 | 16646996  | 16808700  | + |
| 18326 | 1441574_at   | Region | Pitpnc1       | 71795  | 11 | 107033195 | 107291788 | - |
| 18327 | 1415728_at   | Region | Pabpn1        | 54196  | 14 | 49410993  | 49414893  | + |
| 18328 | 1447672_x_at | Region | Pskh1         | 244631 | 8  | 105196321 | 105227649 | + |
| 18329 | 1425865_a_at | Region | Lig3          | 16882  | 11 | 82520876  | 82541867  | + |
| 18330 | 1425484_at   | Region | Tox           | 252838 | 4  | 6614604   | 6917869   | - |
| 18331 | 1444082_at   | Region | A730017C20Rik | 225583 | 18 | 59287736  | 59302184  | + |
| 18332 | 1434495_at   | Region | Zfp278        | 56218  | 11 | 3185244   | 3203304   | + |
| 18333 | 1427894_at   | Region | Slitl2        | 246154 | 16 | 4311498   | 4322290   | + |
| 18334 | 1448734_at   | Region | Cp            | 12870  | 3  | 19298453  | 19333864  | + |
| 18335 | 1417974_at   | Region | Kpna4         | 16649  | 3  | 68742743  | 68797614  | - |
| 18336 | 1456337_at   | Region | Centd1        | 212285 | 5  | 61409120  | 61555599  | - |
| 18337 | 1422687_at   | Region | None          | None   | 3  | 102486135 | 102494605 | + |
| 18338 | 1433283_s_at | Region | 4930529H12Rik | 75204  | Y  | 25782383  | 25792672  | + |
| 18339 | 1455013_at   | Region | Arih2         | 23807  | 9  | 108651717 | 108698223 | - |
| 18340 | 1428104_at   | Region | Tpx2          | 72119  | 2  | 152304999 | 152350954 | + |
| 18341 | 1453720_at   | Region | Rnf157        | 217340 | 11 | 116157470 | 116234559 | - |
| 18342 | 1456363_at   | Region | St7l          | 229681 | 3  | 104291995 | 104353941 | + |
| 18343 | 1427782_a_at | Region | Crhr1         | 12921  | 11 | 103954131 | 103996611 | + |
| 18344 | 1420937_at   | Region | Cpsf2         | 51786  | 12 | 97421457  | 97450986  | + |
| 18345 | 1420657_at   | Region | Ucp3          | 22229  | 7  | 94579662  | 94593103  | + |
| 18346 | 1428797_at   | Region | 0610039J04Rik | 66523  | 8  | 124126680 | 124150314 | - |
| 18347 | 1429459_at   | Region | Sema3d        | 108151 | 5  | 11823702  | 12027204  | + |
| 18348 | 1454628_at   | Region | A930037G23Rik | 320678 | 6  | 125801418 | 125818067 | + |
| 18349 | 1431825_at   | Region | Stk23         | 56504  | X  | 68435077  | 68439580  | + |

|       |              |        |               |        |      |           |           |      |
|-------|--------------|--------|---------------|--------|------|-----------|-----------|------|
| 18350 | 1448613_at   | Region | Ecm1          | 13601  | 3    | 95221981  | 95227394  | -    |
| 18351 | 1438520_at   | Region | Slc25a36      | 192287 | 9    | 96976369  | 97010399  | -    |
| 18352 | 1435157_at   | Region | 5830454D03Rik | 109029 | 8    | 24746173  | 24747112  | -    |
| 18353 | 1446276_at   | Region | None          | None   | 16   | 14778215  | 14778894  | -    |
| 18354 | 1437953_at   | Region | 2310032D16Rik | 74182  | 2    | 132043251 | 132092031 | -    |
| 18355 | 1438146_x_at | Region | None          | None   | 7    | 41076380  | 41076877  | -    |
| 18356 | 1457357_at   | Region | Tlk2          | 24086  | 11   | 104998272 | 105103265 | +    |
| 18357 | 1444211_at   | Region | Endogl1       | 208194 | 9    | 119439221 | 119458491 | +    |
| 18358 | 1452438_s_at | Region | Taf4a         | 228980 | 2    | 179629110 | 179693604 | -    |
| 18359 | 1429506_at   | Region | Nkd1          | 93960  | 8    | 87806676  | 87877632  | +    |
| 18360 | 1416463_at   | Region | Gpiap1        | 53872  | 2    | 103469773 | 103502351 | -    |
| 18361 | 1426969_at   | Region | Trim23        | 81003  | 13   | 100397284 | 100420234 | +    |
| 18362 | 1425273_s_at | Region | Emp2          | 13731  | 16   | 9952848   | 9985199   | -    |
| 18363 | 1450967_at   | Region | 4933428I03Rik | 66775  | 4    | 87399122  | 87425111  | -    |
| 18364 | 1443824_s_at | Region | Car7          | 12354  | 8    | 103833942 | 103843478 | +    |
| 18365 | 1457042_at   | Region | None          | None   | 6    | 101286708 | 101287488 | +    |
| 18366 | 1441204_at   | Region | A130019P10Rik | 399617 | 10   | 61406376  | 61407057  | -    |
| 18367 | 1454393_at   | Region | 2310047C04Rik | 224170 | 16   | 47767664  | 47835780  | -    |
| 18368 | 1438169_a_at | Region | Frmd4b        | 232288 | 6    | 97752751  | 97993840  | -    |
| 18369 | 1454923_at   | Region | AW214353      | 107036 | NONE | NONE      | NONE      | NONE |
| 18370 | 1435911_s_at | Region | Slc2a12       | 353169 | 10   | 22634051  | 22693947  | +    |
| 18371 | 1424051_at   | Region | Col4a2        | 12827  | 8    | 10685449  | 10825114  | +    |
| 18372 | 1444762_at   | Region | Ppp1r12a      | 17931  | 10   | 108049328 | 108167253 | +    |
| 18373 | 1439304_at   | Region | B230216N24Rik | 78603  | 1    | 97825770  | 97826481  | -    |
| 18374 | 1441767_at   | Region | Zfp142        | 77264  | 1    | 74868909  | 74890473  | -    |
| 18375 | 1440470_at   | Region | C030006K11Rik | 223665 | 15   | 76772844  | 76775219  | -    |
| 18376 | 1459658_at   | Region | None          | None   | 8    | 74292042  | 74292364  | +    |
| 18377 | 1453170_at   | Region | 2610206C24Rik | 67158  | 18   | 32150744  | 32151382  | -    |
| 18378 | 1416975_at   | Region | Stam2         | 56324  | 2    | 52624368  | 52674311  | -    |
| 18379 | 1440563_at   | Region | Fancc         | 14088  | 13   | 60694745  | 60814715  | -    |
| 18380 | 1439705_at   | Region | Ptpn12        | 19248  | 5    | 19439215  | 19508367  | -    |
| 18381 | 1433496_at   | Region | Glt25d1       | 234407 | 8    | 70760670  | 70774886  | +    |
| 18382 | 1458216_at   | Region | None          | None   | 1    | 38160302  | 38160649  | +    |
| 18383 | 1455478_at   | Region | Ppfia1        | 233977 | 7    | 138888626 | 138965593 | -    |
| 18384 | 1424296_at   | Region | Gclc          | 14629  | 9    | 77899181  | 77938127  | +    |
| 18385 | 1416722_at   | Region | Hmg20a        | 66867  | 9    | 56527993  | 56606058  | +    |
| 18386 | 1417207_at   | Region | Dvl2          | 13543  | 11   | 69726284  | 69735769  | +    |
| 18387 | 1451333_a_at | Region | Acrbp         | 54137  | 6    | 125705979 | 125719247 | +    |
| 18388 | 1453534_at   | Region | 2810004I08Rik | 69932  | 10   | 105730775 | 105733702 | -    |
| 18389 | 1458436_at   | Region | None          | None   | 13   | 51470568  | 51470781  | -    |
| 18390 | 1437771_at   | Region | 1110067I12Rik | 68852  | 19   | 8049785   | 8050457   | +    |
| 18391 | 1434133_s_at | Region | None          | None   | 1    | 172108858 | 172125304 | +    |
| 18392 | 1421836_at   | Region | None          | None   | 10   | 20074928  | 20208696  | +    |
| 18393 | 1418669_at   | Region | None          | None   | 4    | 136350082 | 136451892 | +    |
| 18394 | 1434437_x_at | Region | Rrm2          | 20135  | 12   | 21258038  | 21263862  | +    |
| 18395 | 1426421_s_at | Region | 1700009P03Rik | 74213  | 14   | 99658921  | 99720050  | -    |
| 18396 | 1422113_at   | Region | Slc5a5        | 114479 | 8    | 70039215  | 70048437  | -    |
| 18397 | 1429842_at   | Region | Mdh1b         | 76668  | 1    | 63991845  | 64023336  | -    |
| 18398 | 1457778_at   | Region | Stox2         | 71069  | 8    | 46138301  | 46167033  | -    |
| 18399 | 1434122_at   | Region | Fbxo27        | 233040 | 7    | 24098722  | 24105207  | +    |
| 18400 | 1454825_at   | Region | 1110014N23Rik | 68505  | 19   | 5858871   | 5865993   | -    |
| 18401 | 1456859_at   | Region | None          | None   | 2    | 74212586  | 74213047  | -    |
| 18402 | 1426669_at   | Region | C530044N13Rik | 223978 | 16   | 8039700   | 8138558   | -    |
| 18403 | 1423099_a_at | Region | Mettl3        | 56335  | 14   | 47394773  | 47405188  | -    |
| 18404 | 1427678_at   | Region | Zim3          | 116811 | 7    | 6167455   | 6182644   | -    |
| 18405 | 1427339_at   | Region | Slc30a2       | 230810 | 4    | 133303948 | 133315380 | +    |
| 18406 | 1448046_at   | Region | Rabepk        | 227746 | 2    | 34710828  | 34731953  | -    |
| 18407 | 1459801_at   | Region | B3galt5       | 93961  | 16   | 95762296  | 95799852  | +    |
| 18408 | 1430391_a_at | Region | St8sia4       | 20452  | 1    | 95359334  | 95439253  | -    |
| 18409 | 1428475_at   | Region | 1190005P17Rik | 66225  | 10   | 119804757 | 119809767 | +    |
| 18410 | 1458746_at   | Region | A430107O13Rik | 214642 | 6    | 22056746  | 22284808  | +    |
| 18411 | 1427703_at   | Region | Pafah1b1      | 18472  | 11   | 74399613  | 74450328  | -    |
| 18412 | 1419097_a_at | Region | Stom          | 13830  | 2    | 35246152  | 35269171  | -    |
| 18413 | 1416337_at   | Region | Uqcrb         | 67530  | 13   | 63503055  | 63507784  | -    |
| 18414 | 1460234_at   | Region | BC054822      | 192652 | 11   | 75166610  | 75180353  | -    |

|       |              |        |                   |        |    |           |           |   |
|-------|--------------|--------|-------------------|--------|----|-----------|-----------|---|
| 18415 | 1422764_at   | Region | Mapre1            | 13589  | 2  | 153198313 | 153225162 | + |
| 18416 | 1437362_at   | Region | A930028L21Rik     | 229780 | 3  | 115354021 | 115363721 | - |
| 18417 | 1436300_at   | Region | Ripk5             | 213452 | 1  | 132274936 | 132320783 | + |
| 18418 | 1452134_at   | Region | 3010001K23Rik     | 72392  | 5  | 107706217 | 107723478 | + |
| 18419 | 1459626_at   | Region | None              | None   | 11 | 97671401  | 97671893  | - |
| 18420 | 1425842_at   | Region | Edil3             | 13612  | 13 | 84938267  | 85437638  | + |
| 18421 | 1430107_at   | Region | 9230116B18Rik     | 78245  | 2  | 3250081   | 3258264   | + |
| 18422 | 1436802_at   | Region | Ilf3              | 16201  | 9  | 21254848  | 21291586  | + |
| 18423 | 1425203_at   | Region | Ddx19b            | 234733 | 8  | 110304375 | 110325446 | - |
| 18424 | 1460111_at   | Region | Myt1l             | 17933  | 12 | 26094752  | 26491102  | + |
| 18425 | 1456082_x_at | Region | Cct4              | 12464  | 11 | 22885383  | 22898126  | + |
| 18426 | 1436952_at   | Region | Klf9              | 16601  | 19 | 22379147  | 22404832  | + |
| 18427 | 1437957_at   | Region | 7030407O06Rik     | 320392 | 12 | 78436467  | 78437126  | - |
| 18428 | 1440668_at   | Region | Adamtsl3          | 269959 | 7  | 76340040  | 76470969  | + |
| 18429 | 1434284_at   | Region | G630013P12Rik     | 218513 | 13 | 96212928  | 96218702  | - |
| 18430 | 1417440_at   | Region | Arid1a            | 93760  | 4  | 132639909 | 132683944 | - |
| 18431 | 1435172_at   | Region | Eomes             | 13813  | 9  | 118472453 | 118479608 | + |
| 18432 | 1421948_a_at | Region | 2610507L03Rik     | 72140  | 7  | 30562511  | 30603407  | + |
| 18433 | 1434692_at   | Region | 1110034B05Rik     | 68736  | 1  | 57691976  | 57710415  | - |
| 18434 | 1415776_at   | Region | Aldh3a2           | 11671  | 11 | 60970498  | 60992756  | - |
| 18435 | 1425268_a_at | Region | 3110045G13Rik     | 73182  | 3  | 87494202  | 87514047  | - |
| 18436 | 1427702_at   | Region | Zfp1              | 22640  | 8  | 110941032 | 110968597 | + |
| 18437 | 1426129_at   | Region | Brms1             | 107392 | 19 | 4830194   | 4838707   | + |
| 18438 | 1448701_a_at | Region | Ccm1              | 79264  | 5  | 3809194   | 3847364   | + |
| 18439 | 1459690_at   | Region | Zfp426            | 235028 | 9  | 20341367  | 20365016  | - |
| 18440 | 1451306_at   | Region | Cdca7l            | 217946 | 12 | 113608220 | 113642229 | + |
| 18441 | 1434689_at   | Region | Zfp637            | 232337 | 6  | 118272695 | 118277409 | + |
| 18442 | 1445425_at   | Region | LOC432958         | 432958 | 15 | 63427667  | 63498744  | - |
| 18443 | 1438643_at   | Region | Camk1d            | 227541 | 2  | 5214190   | 5631787   | - |
| 18444 | 1430642_at   | Region | 2900001G08Rik     | 76950  | 17 | 28751040  | 28753533  | + |
| 18445 | 1424151_at   | Region | MGI:2385237       | 231872 | 5  | 142944317 | 142951426 | - |
| 18446 | 1452204_at   | Region | Anks1             | 224650 | 17 | 25705258  | 25858555  | + |
| 18447 | 1433570_s_at | Region | Mak10             | 78689  | 13 | 58245009  | 58294396  | + |
| 18448 | 1422046_at   | Region | Itgam             | 16409  | 7  | 122085995 | 122167434 | + |
| 18449 | 1457384_at   | Region | None              | None   | 8  | 21163057  | 21163480  | - |
| 18450 | 1422796_at   | Region | Prep              | 19072  | 10 | 45184189  | 45275958  | + |
| 18451 | 1449969_at   | Region | Tmod4             | 50874  | 3  | 94613362  | 94617039  | + |
| 18452 | 1445500_at   | Region | None              | None   | 12 | 18791693  | 18792112  | + |
| 18453 | 1438688_at   | Region | Srrm2             | 75956  | 17 | 21605406  | 21626916  | + |
| 18454 | 1440627_at   | Region | Atp8a2            | 50769  | 14 | 54182804  | 54623125  | - |
| 18455 | 1424596_s_at | Region | Lmcd1             | 30937  | 6  | 112835874 | 112893523 | + |
| 18456 | 1440048_at   | Region | Smarca5           | 93762  | 8  | 79911951  | 79951467  | - |
| 18457 | 1446194_at   | Region | Nr2c1             | 22025  | 10 | 94129628  | 94168693  | + |
| 18458 | 1424459_at   | Region | BC005662          | 210992 | 13 | 69524486  | 69573696  | + |
| 18459 | 1429957_at   | Region | 2310002B14Rik     | 69533  | 16 | 87804256  | 87805228  | - |
| 18460 | 1419290_at   | Region | 1600013P15Rik     | 67011  | 14 | 29610661  | 29626848  | - |
| 18461 | 1434505_a_at | Region | None              | None   | 8  | 119519703 | 119520816 | + |
| 18462 | 1457880_at   | Region | None              | None   | 5  | 98226104  | 98226705  | - |
| 18463 | 1459357_at   | Region | Nfasc             | 269116 | 1  | 132427503 | 132603217 | - |
| 18464 | 1459237_at   | Region | Atf2              | 11909  | 2  | 73516345  | 73590377  | - |
| 18465 | 1449215_at   | Region | Slc22a21          | 56517  | 11 | 53703665  | 53732868  | - |
| 18466 | 1438917_x_at | Region | Nup62             | 18226  | 7  | 38891347  | 38905734  | + |
| 18467 | 1427907_at   | Region | 1110037F02Rik     | 66185  | 4  | 11412923  | 11477649  | + |
| 18468 | 1427309_at   | Region | BC027073          | 230577 | 4  | 105610011 | 105614187 | + |
| 18469 | 1428330_at   | Region | 2610510B01Rik     | 70028  | 16 | 92972121  | 92980341  | + |
| 18470 | 1441037_at   | Region | None              | None   | 18 | 53128861  | 53129549  | + |
| 18471 | 1459716_at   | Region | Al835735          | 102589 | 9  | 50764983  | 50765345  | - |
| 18472 | 1425648_at   | Region | Trim60 /// Trim61 | 234329 | 8  | 64114328  | 64132822  | - |
| 18473 | 1443134_at   | Region | ---               | 503690 | 5  | 114532913 | 114533579 | - |
| 18474 | 1428689_at   | Region | Tysnd1            | 71767  | 10 | 61661818  | 61669070  | + |
| 18475 | 1428243_at   | Region | 1700021K19Rik     | 224118 | 16 | 31629788  | 31676391  | - |
| 18476 | 1458452_at   | Region | 3010027A04Rik     | 77087  | 8  | 122264618 | 122423554 | - |
| 18477 | 1427258_at   | Region | Trim24            | 21848  | 6  | 38005830  | 38101311  | + |
| 18478 | 1453404_at   | Region | 2900002H16Rik     | 75695  | 5  | 123664423 | 123702734 | - |
| 18479 | 1428845_at   | Region | Bclaf1            | 72567  | 10 | 20239740  | 20267469  | + |

|       |              |        |               |        |      |           |           |      |
|-------|--------------|--------|---------------|--------|------|-----------|-----------|------|
| 18480 | 1420519_a_at | Region | Eral1         | 57837  | 11   | 77799035  | 77806004  | -    |
| 18481 | 1428746_a_at | Region | 1110007F05Rik | 71787  | 4    | 131272654 | 131290416 | -    |
| 18482 | 1445713_at   | Region | 9630041G16Rik | 100223 | 4    | 56901589  | 56901783  | +    |
| 18483 | 1444073_at   | Region | Maf           | 17132  | 8    | 115014984 | 115016041 | -    |
| 18484 | 1453174_at   | Region | 2310076G13Rik | 71938  | 1    | 60638785  | 60641619  | +    |
| 18485 | 1447728_x_at | Region | Hspa9a        | 15526  | 18   | 35161089  | 35177981  | -    |
| 18486 | 1440791_x_at | Region | Tcea2         | 21400  | 2    | 181397266 | 181405007 | +    |
| 18487 | 1449090_a_at | Region | Yes1          | 22612  | 5    | 31069457  | 31146984  | +    |
| 18488 | 1428961_a_at | Region | Sfrs16        | 53609  | 7    | 16450287  | 16473605  | -    |
| 18489 | 1418033_s_at | Region | Zfp535        | 52712  | 11   | 65532894  | 65554889  | +    |
| 18490 | 1457642_at   | Region | 5730507N06Rik | 70622  | 2    | 18090623  | 18090916  | -    |
| 18491 | 1454428_at   | Region | 4930467D19Rik | 75004  | 11   | 103326371 | 103328046 | +    |
| 18492 | 1431352_s_at | Region | Pvt1          | 19296  | 15   | 62055194  | 62257049  | +    |
| 18493 | 1447591_x_at | Region | A830082N09Rik | 414093 | 10   | 34047187  | 34047372  | -    |
| 18494 | 1423900_at   | Region | Trip12        | 14897  | 1    | 85055153  | 85095994  | -    |
| 18495 | 1440480_at   | Region | LOC192950     | 192950 | 11   | 6492611   | 6500842   | -    |
| 18496 | 1417882_at   | Region | Slc39a3       | 106947 | 10   | 81162385  | 81167757  | -    |
| 18497 | 1425839_at   | Region | Fkbp11        | 66120  | 15   | 98781810  | 98785637  | -    |
| 18498 | 1416438_at   | Region | 2410104I19Rik | 67959  | 15   | 76118862  | 76129542  | -    |
| 18499 | 1439505_at   | Region | Clic5         | 224796 | 17   | 41693345  | 41782570  | +    |
| 18500 | 1416848_at   | Region | Ubl5          | 66177  | 9    | 20514222  | 20517693  | +    |
| 18501 | 1418112_at   | Region | Mrpl10        | 107732 | 11   | 96862673  | 96870300  | +    |
| 18502 | 1459573_at   | Region | 2310066N05Rik | 70285  | 3    | 145482969 | 145497969 | -    |
| 18503 | 1443513_at   | Region | Cox11         | 69802  | 11   | 90459260  | 90466023  | +    |
| 18504 | 1440408_at   | Region | B830008J18Rik | 319947 | NONE | NONE      | NONE      | NONE |
| 18505 | 1441330_at   | Region | Crb1          | 170788 | 1    | 139045517 | 139224215 | -    |
| 18506 | 1443764_x_at | Region | Rab27b        | 80718  | 18   | 70213787  | 70288489  | -    |
| 18507 | 1453053_at   | Region | 2610036L11Rik | 66311  | 10   | 30232476  | 30408425  | -    |
| 18508 | 1455394_at   | Region | None          | None   | 10   | 81288081  | 81288804  | -    |
| 18509 | 1428311_at   | Region | 2810012H18Rik | 76551  | 10   | 70243818  | 70247349  | +    |
| 18510 | 1424786_s_at | Region | Wdr45         | 54636  | X    | 5961189   | 5967141   | +    |
| 18511 | 1424356_a_at | Region | Metrn1        | 210029 | 11   | 121523520 | 121538482 | +    |
| 18512 | 1433068_at   | Region | 6330582A15Rik | 76878  | NONE | NONE      | NONE      | NONE |
| 18513 | 1448116_at   | Region | Ube1x         | 22201  | X    | 18897361  | 18922119  | +    |
| 18514 | 1449688_at   | Region | D10Ertd610e   | 52666  | 10   | 126915321 | 126923060 | -    |
| 18515 | 1447531_x_at | Region | Cugbp2        | 14007  | 2    | 6459141   | 6638885   | -    |
| 18516 | 1416450_at   | Region | Tbn           | 63856  | 17   | 45006510  | 45020747  | -    |
| 18517 | 1451779_at   | Region | BC027061      | 232491 | 6    | 143188941 | 143205305 | +    |
| 18518 | 1440373_at   | Region | Elavl1        | 15568  | 8    | 3643294   | 3667872   | -    |
| 18519 | 1420070_a_at | Region | Gm696         | 277973 | 8    | 104644962 | 104658911 | +    |
| 18520 | 1455995_at   | Region | D10Bwg1379e   | 215821 | 10   | 18490148  | 18668026  | -    |
| 18521 | 1460356_at   | Region | Esam1         | 69524  | 9    | 37469661  | 37479855  | +    |
| 18522 | 1457653_at   | Region | Csf1r         | 12978  | 18   | 61331201  | 61356458  | +    |
| 18523 | 1435889_at   | Region | Mark2         | 13728  | 19   | 6990598   | 7055161   | -    |
| 18524 | 1453834_at   | Region | 1500002C15Rik | 68946  | 4    | 154226027 | 154227364 | -    |
| 18525 | 1444131_at   | Region | 2610101N10Rik | 67958  | 9    | 95369771  | 95420790  | -    |
| 18526 | 1431962_a_at | Region | Stambp        | 70527  | 6    | 83887437  | 83916666  | -    |
| 18527 | 1423141_at   | Region | Lip1          | 16889  | 19   | 33824007  | 33859684  | -    |
| 18528 | 1452220_at   | Region | Dock1         | 330662 | 7    | 129038306 | 129541299 | +    |
| 18529 | 1428479_at   | Region | Nfatc1        | 18018  | 18   | 80729557  | 80836410  | -    |
| 18530 | 1449935_a_at | Region | Dnaja3        | 83945  | 16   | 4355627   | 4379131   | +    |
| 18531 | 1418404_at   | Region | Rad9          | 19367  | 19   | 3983988   | 3990393   | -    |
| 18532 | 1448504_a_at | Region | None          | None   | 1    | 58951467  | 58953202  | +    |
| 18533 | 1436712_at   | Region | Pla2g4c       | 232889 | 7    | 11323270  | 11353889  | +    |
| 18534 | 1454222_a_at | Region | Ccdc13        | 72894  | 9    | 121810629 | 121823689 | -    |
| 18535 | 1455506_at   | Region | None          | None   | 4    | 140500001 | 140500487 | -    |
| 18536 | 1428277_at   | Region | 2600013N14Rik | 72201  | 4    | 14736470  | 14753349  | -    |
| 18537 | 1441901_x_at | Region | Fahd2a        | 68126  | 2    | 126950068 | 126958394 | -    |
| 18538 | 1453040_at   | Region | 2810402A17Rik | 67062  | X    | 130545957 | 130586403 | -    |
| 18539 | 1419204_at   | Region | Dll1          | 13388  | 17   | 13371006  | 13379239  | -    |
| 18540 | 1434953_at   | Region | 4633402D15Rik | 70829  | 1    | 121194302 | 121212958 | +    |
| 18541 | 1419513_a_at | Region | Ect2          | 13605  | 3    | 26515043  | 26571653  | -    |
| 18542 | 1448056_at   | Region | Huwe1         | 59026  | X    | 145444189 | 145445007 | +    |
| 18543 | 1436597_at   | Region | Ankhd1        | 108857 | 18   | 36872342  | 36882677  | +    |
| 18544 | 1449827_at   | Region | Agc1          | 11595  | 7    | 72845590  | 72907206  | +    |

|       |              |        |               |        |    |           |           |   |
|-------|--------------|--------|---------------|--------|----|-----------|-----------|---|
| 18545 | 1436059_at   | Region | Rfx1          | 19724  | 8  | 83330088  | 83360431  | + |
| 18546 | 1448482_at   | Region | Slc39a8       | 67547  | 3  | 134710465 | 134772768 | + |
| 18547 | 1426426_at   | Region | Rbm13         | 67920  | 8  | 29942286  | 29951542  | - |
| 18548 | 1449608_a_at | Region | None          | None   | 13 | 48081110  | 48081498  | - |
| 18549 | 1440709_at   | Region | C130081A10Rik | 97550  | 9  | 50921489  | 50922068  | + |
| 18550 | 1427467_a_at | Region | Rpgr          | 19893  | X  | 8397164   | 8455861   | - |
| 18551 | 1430275_a_at | Region | Aqr           | 11834  | 2  | 113615012 | 113689159 | - |
| 18552 | 1427171_at   | Region | Rlf           | 109263 | 4  | 120167817 | 120237523 | - |
| 18553 | 1442295_at   | Region | Arpc2         | 76709  | 1  | 74538971  | 74570677  | + |
| 18554 | 1443294_at   | Region | Crk7          | 69131  | 11 | 98024401  | 98067791  | + |
| 18555 | 1430488_at   | Region | 1700066B19Rik | 73449  | 18 | 35950670  | 35952866  | + |
| 18556 | 1443729_at   | Region | Mtss1         | 211401 | 15 | 58954404  | 59092928  | - |
| 18557 | 1428779_at   | Region | Zbtb41        | 226470 | 1  | 139269557 | 139296474 | + |
| 18558 | 1442018_at   | Region | Al426953      | 103207 | 10 | 96599811  | 96600436  | + |
| 18559 | 1436189_at   | Region | Serpinb6a     | 20719  | 13 | 33449537  | 33467606  | - |
| 18560 | 1460559_at   | Region | Ankrd25       | 235041 | 9  | 21661250  | 21691677  | - |
| 18561 | 1418089_at   | Region | Stx8          | 55943  | 11 | 67692133  | 67932806  | + |
| 18562 | 1424255_at   | Region | Supt5h        | 20924  | 7  | 23712498  | 23737897  | - |
| 18563 | 1435737_a_at | Region | Nde1          | 67203  | 16 | 12905487  | 12928489  | + |
| 18564 | 1417248_at   | Region | Ralbp1        | 19765  | 17 | 63557880  | 63594264  | - |
| 18565 | 1418188_a_at | Region | Ramp2         | 54409  | 11 | 101067518 | 101069332 | + |
| 18566 | 1448266_at   | Region | Edf1          | 59022  | 2  | 25490062  | 25494246  | + |
| 18567 | 1451746_a_at | Region | Atg12l        | 67526  | 18 | 46954183  | 46963313  | - |
| 18568 | 1428543_at   | Region | Ppat          | 231327 | 5  | 76158008  | 76196037  | - |
| 18569 | 1435664_at   | Region | Zfp397        | 69256  | 18 | 24183182  | 24191362  | + |
| 18570 | 1460692_at   | Region | Ehmt2         | 110147 | 17 | 32601358  | 32617827  | + |
| 18571 | 1433001_at   | Region | 1700019L13Rik | 72226  | 9  | 119993099 | 119994745 | + |
| 18572 | 1432047_at   | Region | Depdc2        | 76135  | 1  | 11099255  | 11255533  | + |
| 18573 | 1456623_at   | Region | Tpm1          | 22003  | 9  | 67151552  | 67178023  | - |
| 18574 | 1440790_x_at | Region | AL024069      | 98496  | 1  | 84370257  | 84618548  | - |
| 18575 | 1434516_at   | Region | Pstk          | 214580 | 7  | 125686223 | 125703402 | + |
| 18576 | 1451334_at   | Region | 1810009O10Rik | 69109  | 11 | 78476165  | 78477388  | - |
| 18577 | 1421875_a_at | Region | Mrps23        | 64656  | 11 | 87932410  | 87939499  | + |
| 18578 | 1426561_a_at | Region | Npnt          | 114249 | 3  | 131774826 | 131840439 | - |
| 18579 | 1434167_at   | Region | Slc35e4       | 103710 | 11 | 3801809   | 3809451   | - |
| 18580 | 1455312_at   | Region | Phc3          | 241915 | 3  | 30318234  | 30380826  | - |
| 18581 | 1419209_at   | Region | Cxcl1         | 14825  | 5  | 90207981  | 90209786  | + |
| 18582 | 1443909_at   | Region | Cstf3         | 228410 | 2  | 104295277 | 104370179 | + |
| 18583 | 1434544_at   | Region | 1110025L05Rik | 66162  | 7  | 120745731 | 120746424 | + |
| 18584 | 1425489_at   | Region | D11ErtD730e   | 193116 | 11 | 43186568  | 43200818  | + |
| 18585 | 1428249_at   | Region | Pygo2         | 68911  | 3  | 89186990  | 89191857  | + |
| 18586 | 1418674_at   | Region | Osmr          | 18414  | 15 | 6602157   | 6662956   | - |
| 18587 | 1437239_x_at | Region | Phc2          | 54383  | 4  | 127732109 | 127779987 | + |
| 18588 | 1428915_at   | Region | Sirt5         | 68346  | 13 | 42933150  | 42957643  | + |
| 18589 | 1424427_at   | Region | Tada1l        | 27878  | 1  | 166301077 | 166315398 | - |
| 18590 | 1437850_a_at | Region | Cnbp1         | 12785  | 6  | 88279741  | 88287657  | - |
| 18591 | 1418906_at   | Region | Nubp1         | 26425  | 16 | 10086475  | 10098031  | + |
| 18592 | 1430510_at   | Region | B130050I23Rik | 213027 | 8  | 3521545   | 3563004   | + |
| 18593 | 1426883_at   | Region | AW491445      | 107375 | 19 | 5667256   | 5674558   | + |
| 18594 | 1427013_at   | Region | Car9          | 230099 | 4  | 43422929  | 43429651  | + |
| 18595 | 1451469_at   | Region | B430108F07Rik | 78519  | 4  | 84084296  | 84117940  | + |
| 18596 | 1437007_x_at | Region | Usp39         | 28035  | 6  | 72650650  | 72677149  | - |
| 18597 | 1441844_at   | Region | Eps15-rs      | 13859  | 8  | 71489790  | 71569758  | - |
| 18598 | 1423982_at   | Region | Fusip1        | 14105  | 4  | 134737416 | 134751165 | + |
| 18599 | 1444477_at   | Region | Lrrtm3        | 216028 | 10 | 63866884  | 64028642  | - |
| 18600 | 1449577_x_at | Region | Tpm2          | 22004  | 4  | 43430634  | 43439310  | - |
| 18601 | 1439198_at   | Region | Ptk2          | 14083  | 15 | 73233486  | 73423105  | - |
| 18602 | 1430185_at   | Region | 5830460E08Rik | 76109  | 7  | 69515421  | 69516877  | + |
| 18603 | 1428022_at   | Region | Lcn13         | 227627 | 2  | 25632236  | 25635488  | + |
| 18604 | 1450438_at   | Region | Ncam1         | 17967  | 9  | 49555319  | 49607941  | - |
| 18605 | 1435072_at   | Region | Zfyve1        | 217695 | 12 | 80410951  | 80458920  | - |
| 18606 | 1455017_a_at | Region | Zfp261        | 56364  | X  | 96005746  | 96022210  | - |
| 18607 | 1446562_at   | Region | Sh3kbp1       | 58194  | X  | 153308006 | 153573572 | + |
| 18608 | 1459602_at   | Region | Ccni          | 12453  | 5  | 92517687  | 92541778  | - |
| 18609 | 1457792_at   | Region | None          | None   | 15 | 98968123  | 98968651  | - |

|       |              |        |               |        |      |           |           |      |
|-------|--------------|--------|---------------|--------|------|-----------|-----------|------|
| 18610 | 1442103_at   | Region | Nipbl         | 71175  | 15   | 8078809   | 8232047   | -    |
| 18611 | 1423738_at   | Region | Oxa1l         | 69089  | 14   | 48877816  | 48886644  | +    |
| 18612 | 1436834_x_at | Region | Mdh1          | 17449  | 11   | 21451580  | 21466622  | -    |
| 18613 | 1442437_at   | Region | Ptk2b         | 19229  | 14   | 60680682  | 60808472  | -    |
| 18614 | 1457360_at   | Region | Cfdp1         | 23837  | 8    | 111066062 | 111151899 | -    |
| 18615 | 1417758_at   | Region | ltga2b        | 16399  | 11   | 102274384 | 102290831 | -    |
| 18616 | 1433441_at   | Region | Fbxl5         | 242960 | 5    | 42512957  | 42539147  | -    |
| 18617 | 1425819_at   | Region | Zbtb36        | 207259 | 18   | 76055363  | 76384962  | +    |
| 18618 | 1453622_s_at | Region | MlIt3         | 70122  | 4    | 86758854  | 87019463  | -    |
| 18619 | 1422626_at   | Region | Mmp16         | 17389  | 4    | 17780448  | 18043598  | +    |
| 18620 | 1440260_at   | Region | A930007B11Rik | 77944  | 16   | 34858068  | 34859199  | +    |
| 18621 | 1458289_at   | Region | Galntl4       | 233733 | 7    | 105324798 | 105633114 | -    |
| 18622 | 1425006_a_at | Region | Vrk1          | 22367  | 12   | 101457929 | 101523008 | +    |
| 18623 | 1448839_at   | Region | D17ErtD288e   | 80880  | 17   | 31509056  | 31521298  | +    |
| 18624 | 1417448_at   | Region | 1810008A18Rik | 108707 | 10   | 77598097  | 77627221  | -    |
| 18625 | 1455704_at   | Region | 4931440N07Rik | 381560 | 4    | 131685803 | 131693445 | -    |
| 18626 | 1419840_at   | Region | Al507495      | 105866 | 15   | 101835022 | 101844920 | -    |
| 18627 | 1440994_at   | Region | None          | None   | 10   | 11094929  | 11095592  | +    |
| 18628 | 1427593_at   | Region | Trim8         | 93679  | 19   | 46050008  | 46064111  | +    |
| 18629 | 1450865_s_at | Region | Mrps24        | 64660  | 11   | 5598770   | 5602472   | -    |
| 18630 | 1454449_at   | Region | Rabepk        | 227746 | 2    | 34710828  | 34731953  | -    |
| 18631 | 1436354_at   | Region | Dzip1l        | 72507  | 9    | 99531123  | 99570401  | +    |
| 18632 | 1438172_x_at | Region | 4933424N09Rik | 71151  | 7    | 113660463 | 113669549 | -    |
| 18633 | 1459453_at   | Region | Robo1         | 19876  | 16   | 71741946  | 72126752  | +    |
| 18634 | 1453416_at   | Region | Gas2l3        | 237436 | 10   | 89385653  | 89416830  | -    |
| 18635 | 1437848_x_at | Region | Adpgk         | 72141  | 9    | 59408367  | 59432955  | +    |
| 18636 | 1453724_a_at | Region | Serpinf1      | 20317  | 11   | 75135427  | 75148170  | -    |
| 18637 | 1417824_at   | Region | Gcat          | 26912  | 15   | 79082206  | 79089640  | +    |
| 18638 | 1456191_x_at | Region | Pacsin3       | 80708  | 2    | 90957350  | 90969427  | +    |
| 18639 | 1431353_at   | Region | C330050A14Rik | 78704  | 3    | 46037953  | 46038960  | +    |
| 18640 | 1447595_x_at | Region | 1810012K16Rik | 69108  | 8    | 21150892  | 21151766  | +    |
| 18641 | 1443261_at   | Region | E130307A14Rik | 327744 | 10   | 39748918  | 39801774  | -    |
| 18642 | 1440130_at   | Region | BB116930      | 98740  | NONE | NONE      | NONE      | NONE |
| 18643 | 1417238_at   | Region | Ewsr1         | 14030  | 11   | 4964688   | 4993864   | -    |
| 18644 | 1424935_at   | Region | Gdap1l1       | 228858 | 2    | 162895447 | 162910921 | +    |
| 18645 | 1433475_a_at | Region | C78339        | 97863  | 13   | 46253320  | 46273975  | +    |
| 18646 | 1455756_at   | Region | F730014I05Rik | 228866 | 2    | 164336101 | 164348170 | +    |
| 18647 | 1422309_a_at | Region | Lenep ///     |        |      |           |           |      |
| 18647 | 1422309_a_at | Region | A930017E24Rik | 319945 | 3    | 89157732  | 89168601  | -    |
| 18648 | 1451226_at   | Region | Pex6          | 224824 | 17   | 44222425  | 44236648  | +    |
| 18649 | 1428798_s_at | Region | 0610039J04Rik | 66523  | 8    | 124126680 | 124150314 | -    |
| 18650 | 1439400_x_at | Region | 5430433E21Rik | 74492  | 9    | 65510949  | 65513917  | -    |
| 18651 | 1433618_at   | Region | C330006A16Rik | 109299 | 2    | 26068973  | 26070848  | -    |
| 18652 | 1458395_at   | Region | B930054O08    | 327837 | 10   | 122889763 | 122890511 | +    |
| 18653 | 1426782_at   | Region | Gpr125        | 70693  | 5    | 48771796  | 48873049  | -    |
| 18654 | 1420881_at   | Region | Nsd1          | 18193  | 13   | 53854390  | 53923720  | +    |
| 18655 | 1423385_at   | Region | Actr8         | 56249  | 14   | 28112122  | 28126949  | +    |
| 18656 | 1443005_at   | Region | Zfhx1a        | 21417  | 18   | 5709786   | 5817483   | +    |
| 18657 | 1455633_at   | Region | Zfp647        | 239546 | 15   | 76961299  | 76976539  | -    |
| 18658 | 1436219_at   | Region | 4933403F05Rik | 108654 | 18   | 68497464  | 68531006  | -    |
| 18659 | 1442319_at   | Region | Usp4          | 22258  | 9    | 108417796 | 108462269 | +    |
| 18660 | 1452629_at   | Region | Safb2         | 224902 | 17   | 54251255  | 54263875  | -    |
| 18661 | 1422482_at   | Region | Ruvbl2        | 20174  | 7    | 39499052  | 39511390  | -    |
| 18662 | 1453211_at   | Region | 1700019B01Rik | 70054  | 7    | 84476433  | 84478520  | +    |
| 18663 | 1437040_at   | Region | Etnk2         | 214253 | 1    | 133225130 | 133236393 | +    |
| 18664 | 1429831_at   | Region | Pik3ap1       | 83490  | 19   | 40818590  | 40929442  | -    |
| 18665 | 1448451_at   | Region | Ak2           | 11637  | 4    | 128020427 | 128038642 | +    |
| 18666 | 1421137_a_at | Region | Pkib          | 18768  | 10   | 57894545  | 58001405  | +    |
| 18667 | 1446969_at   | Region | 9630037P07Rik | 227210 | 1    | 64989291  | 65019720  | +    |
| 18668 | 1460138_at   | Region | None          | None   | 19   | 20911861  | 20912164  | +    |
| 18669 | 1456236_s_at | Region | Commd10       | 69456  | 18   | 47180632  | 47309751  | +    |
| 18670 | 1439388_s_at | Region | Bcar1         | 12927  | 8    | 111008063 | 111041398 | -    |
| 18671 | 1450025_at   | Region | Pard6g        | 93737  | 18   | 80170776  | 80242901  | +    |
| 18672 | 1457544_at   | Region | 6130401J04Rik | 66799  | 1    | 16725948  | 16804454  | -    |
| 18673 | 1435180_at   | Region | Podn          | 242608 | 4    | 106973698 | 106990995 | -    |

|       |              |        |               |        |      |           |           |      |
|-------|--------------|--------|---------------|--------|------|-----------|-----------|------|
| 18674 | 1433952_at   | Region | Tufm          | 233870 | 7    | 120537163 | 120540461 | +    |
| 18675 | 1431940_at   | Region | 4933424M13Rik | 74457  | 5    | 134724380 | 134725692 | +    |
| 18676 | 1444550_at   | Region | 1300018I05Rik | 74157  | 17   | 27470422  | 27513276  | +    |
| 18677 | 1430505_at   | Region | 1110032O16Rik | 68742  | 7    | 120935951 | 120972691 | -    |
| 18678 | 1460646_at   | Region | Csnk2a2       | 13000  | 8    | 94726673  | 94766378  | -    |
| 18679 | 1442590_at   | Region | Tnfrsf22      | 79202  | 7    | 138049744 | 138062657 | -    |
| 18680 | 1419207_at   | Region | Zfp37         | 22696  | 4    | 61280734  | 61299618  | -    |
| 18681 | 1440279_at   | Region | None          | None   | 18   | 14170053  | 14170865  | -    |
| 18682 | 1459056_at   | Region | Rasgrf1       | 19417  | 9    | 89795814  | 89912965  | +    |
| 18683 | 1428690_at   | Region | Tysnd1        | 71767  | 10   | 61661818  | 61669070  | +    |
| 18684 | 1420608_at   | Region | Rbm18         | 67889  | 2    | 36048243  | 36068773  | -    |
| 18685 | 1443254_at   | Region | D030011O10Rik | 320560 | 6    | 149949871 | 150037421 | -    |
| 18686 | 1430128_a_at | Region | Dp1l1         | 70335  | 10   | 80455181  | 80461452  | +    |
| 18687 | 1443792_at   | Region | Tsga14        | 83922  | 6    | 30701454  | 30741755  | -    |
| 18688 | 1440832_at   | Region | Ang4          | 219033 | 14   | 46858315  | 46868013  | -    |
| 18689 | 1423901_at   | Region | Trip12        | 14897  | 1    | 85055153  | 85095994  | -    |
| 18690 | 1426593_a_at | Region | Fbxo22        | 71999  | 9    | 55320406  | 55335959  | +    |
| 18691 | 1420815_at   | Region | Gdi3          | 14569  | 13   | 3422528   | 3450201   | +    |
| 18692 | 1448137_at   | Region | Aldh7a1       | 110695 | 18   | 56744086  | 56781108  | -    |
| 18693 | 1423781_at   | Region | Appbp1        | 234664 | 8    | 103804159 | 103830138 | -    |
| 18694 | 1455221_at   | Region | Abcg1         | 11307  | 17   | 28870974  | 28929775  | +    |
| 18695 | 1438614_x_at | Region | Osbp19        | 100273 | 4    | 108020555 | 108061497 | -    |
| 18696 | 1429770_at   | Region | Pggt1b        | 225467 | 18   | 46460574  | 46501475  | -    |
| 18697 | 1451556_a_at | Region | 2700078E11Rik | 78832  | 19   | 60127914  | 60181028  | -    |
| 18698 | 1439787_at   | Region | None          | None   | 5    | 121836078 | 121837200 | +    |
| 18699 | 1426356_at   | Region | 6330578E17Rik | 76178  | 1    | 37711567  | 37713525  | -    |
| 18700 | 1459303_at   | Region | Gpm6a         | 234267 | 8    | 53936872  | 54043110  | +    |
| 18701 | 1456059_at   | Region | Psmd11        | 69077  | 11   | 80154287  | 80197624  | +    |
| 18702 | 1454256_s_at | Region | 1700113I22Rik | 73635  | 11   | 101239901 | 101246420 | -    |
| 18703 | 1447706_at   | Region | None          | None   | NONE | NONE      | NONE      | NONE |
| 18704 | 1453175_at   | Region | Zfp50         | 109929 | 12   | 73204978  | 73206174  | -    |
| 18705 | 1440451_at   | Region | D730048J04Rik | 77856  | 17   | 41035584  | 41036004  | -    |
| 18706 | 1438170_x_at | Region | Adrm1         | 56436  | 2    | 179888546 | 179893241 | +    |
| 18707 | 1417659_at   | Region | Vps29         | 56433  | 5    | 121506763 | 121515637 | +    |
| 18708 | 1434710_at   | Region | Dhx29         | 218629 | 13   | 109322761 | 109364225 | +    |
| 18709 | 1451770_s_at | Region | Dhx9          | 13211  | 1    | 153340539 | 153372335 | -    |
| 18710 | 1439638_at   | Region | Erb2ip        | 59079  | 13   | 100037161 | 100140118 | -    |
| 18711 | 1457045_at   | Region | Galnt13       | 271786 | 2    | 54361926  | 55038861  | +    |
| 18712 | 1432108_at   | Region | Pcgf6         | 71041  | 19   | 46584919  | 46602145  | -    |
| 18713 | 1442863_at   | Region | 5730412N02Rik | 319734 | 6    | 119700072 | 119709391 | +    |
| 18714 | 1459593_x_at | Region | LOC547217     | 547217 | 7    | 265       | 9009      | +    |
| 18715 | 1455774_at   | Region | None          | None   | 8    | 69851008  | 69851565  | -    |
| 18716 | 1454963_at   | Region | E430028B21Rik | 211948 | 14   | 24760322  | 24766051  | -    |
| 18717 | 1447907_x_at | Region | Apba2bp       | 56846  | 2    | 154001342 | 154012591 | -    |
| 18718 | 1450911_at   | Region | Ppib          | 19035  | 9    | 66145681  | 66189949  | +    |
| 18719 | 1442775_at   | Region | St13          | 70356  | 15   | 81415844  | 81450494  | -    |
| 18720 | 1440119_at   | Region | Sipa1l1       | 217692 | 12   | 79172130  | 79311045  | +    |
| 18721 | 1443656_at   | Region | Fut8          | 53618  | 12   | 74095608  | 74332578  | +    |
| 18722 | 1439896_at   | Region | Limk2         | 16886  | 11   | 3239044   | 3303961   | -    |
| 18723 | 1415851_a_at | Region | Impdh2        | 23918  | 9    | 108609499 | 108614571 | +    |
| 18724 | 1427132_at   | Region | Mttr13        | 319934 | 7    | 104160882 | 104472741 | -    |
| 18725 | 1429163_at   | Region | 3110041P15Rik | 73159  | 7    | 99867642  | 99878087  | -    |
| 18726 | 1458666_at   | Region | D2Ert391e     | 51897  | 2    | 91379374  | 91415325  | -    |
| 18727 | 1431374_at   | Region | 6330407A03Rik | 70720  | 4    | 3642110   | 3643949   | +    |
| 18728 | 1434050_at   | Region | Al315068      | 209018 | 16   | 20205751  | 20416183  | +    |
| 18729 | 1416485_at   | Region | Timm23        | 53600  | 14   | 30313306  | 30335011  | -    |
| 18730 | 1451599_at   | Region | Sesn2         | 230784 | 4    | 131453703 | 131471355 | -    |
| 18731 | 1459861_s_at | Region | Fbxl10        | 30841  | 5    | 122023577 | 122142001 | -    |
| 18732 | 1424967_x_at | Region | Tnnt2         | 21956  | 1    | 135683299 | 135699154 | +    |
| 18733 | 1429583_at   | Region | LOC554362     | 554362 | 8    | 23373351  | 23375971  | +    |
| 18734 | 1454070_a_at | Region | Ddhd1         | 114874 | 14   | 40672980  | 40701448  | -    |
| 18735 | 1434506_at   | Region | Arid2         | 77044  | 15   | 96436802  | 96469595  | +    |
| 18736 | 1441470_at   | Region | AV249152      | 216560 | 11   | 21467074  | 21793479  | +    |
| 18737 | 1457044_at   | Region | 4732474O15Rik | 238455 | 12   | 115250643 | 115278405 | +    |
| 18738 | 1439008_at   | Region | Zfp319        | 79233  | 8    | 94610307  | 94616121  | -    |



|       |              |        |                     |        |      |           |           |      |
|-------|--------------|--------|---------------------|--------|------|-----------|-----------|------|
| 18739 | 1419087_s_at | Region | Sf3a1               | 67465  | 11   | 4055155   | 4075416   | +    |
| 18740 | 1441162_at   | Region | None                | None   | 18   | 10114639  | 10115304  | -    |
| 18741 | 1453443_at   | Region | 1110015O18Rik       | 68516  | 3    | 4773012   | 4788431   | +    |
| 18742 | 1445914_at   | Region | Nrf1                | 18181  | 6    | 30095085  | 30200555  | +    |
| 18743 | 1441856_x_at | Region | Tysnd1              | 71767  | 10   | 61661818  | 61669070  | +    |
| 18744 | 1444174_at   | Region | Adamts8             | 30806  | 9    | 30861390  | 30881684  | +    |
| 18745 | 1444686_at   | Region | A930016P21Rik       | 68073  | 15   | 31602722  | 31618141  | +    |
| 18746 | 1442816_at   | Region | AU041882            | 104525 | 11   | 63609804  | 63610896  | -    |
| 18747 | 1441301_at   | Region | Gababrbp            | 76071  | 5    | 35557428  | 35631807  | +    |
| 18748 | 1456422_at   | Region | None                | None   | 6    | 149928454 | 149929684 | -    |
| 18749 | 1444570_at   | Region | Cfdp1               | 23837  | 8    | 111066062 | 111151899 | -    |
| 18750 | 1450349_at   | Region | Stx1b1              | 79361  | 7    | 121856654 | 121874341 | -    |
| 18751 | 1441334_at   | Region | None                | None   | X    | 11432477  | 11433376  | +    |
| 18752 | 1442869_at   | Region | A930013K19          | 231134 | 5    | 33544762  | 33575509  | +    |
| 18753 | 1417557_at   | Region | Ubx1                | 66530  | 17   | 53706451  | 53713187  | -    |
| 18754 | 1453030_at   | Region | Rnf184              | 77853  | 9    | 101048875 | 101053251 | +    |
| 18755 | 1447213_at   | Region | Sp100               | 20684  | 1    | 85456739  | 85507923  | +    |
| 18756 | 1437045_at   | Region | Mapk8               | 26419  | 14   | 31516453  | 31580724  | -    |
| 18757 | 1431677_at   | Region | None                | None   | 11   | 43462297  | 43463723  | +    |
| 18758 | 1420933_a_at | Region | Eya3                | 14050  | 4    | 131599945 | 131685662 | +    |
| 18759 | 1441879_x_at | Region | Mkrn1               | 54484  | 6    | 39533206  | 39555816  | -    |
| 18760 | 1454416_at   | Region | 5730575I04Rik       | 70649  | 2    | 115282017 | 115283861 | +    |
| 18761 | 1459414_at   | Region | Wdfy3               | 72145  | 5    | 100857137 | 101091457 | -    |
| 18762 | 1458933_at   | Region | A530052I06Rik       | 99953  | 3    | 101282357 | 101282915 | -    |
| 18763 | 1436027_at   | Region | Osbpl11             | 106326 | 16   | 31993123  | 32051348  | +    |
| 18764 | 1441718_at   | Region | 4432411E13Rik       | 70790  | 15   | 37972806  | 38204070  | -    |
| 18765 | 1437244_at   | Region | Gas2l3              | 237436 | 10   | 89385653  | 89416830  | -    |
| 18766 | 1439401_x_at | Region | Ppp2r5e             | 26932  | 12   | 72307243  | 72452562  | -    |
| 18767 | 1452440_at   | Region | Tnfsf12 /// Tnfsf13 | 21944  | 11   | 69412006  | 69421412  | -    |
| 18768 | 1438653_x_at | Region | Sca10               | 54138  | 15   | 85384867  | 85511564  | +    |
| 18769 | 1456054_a_at | Region | Pum1                | 80912  | 4    | 129460274 | 129578157 | +    |
| 18770 | 1432853_at   | Region | 2900057C01Rik       | 72987  | 8    | 106272520 | 106273640 | -    |
| 18771 | 1433021_at   | Region | 5830413G11Rik       | 74730  | 5    | 64765682  | 64767115  | +    |
| 18772 | 1431011_at   | Region | Dlst                | 78920  | 12   | 81979590  | 82002780  | +    |
| 18773 | 1456195_x_at | Region | Itgb5               | 16419  | 16   | 32637841  | 32757227  | +    |
| 18774 | 1428898_at   | Region | Mon1a               | 72825  | 9    | 107956169 | 107971112 | +    |
| 18775 | 1440858_at   | Region | Crk7                | 69131  | 11   | 98024401  | 98067791  | +    |
| 18776 | 1439063_at   | Region | Asxl2               | 75302  | 12   | 1933      | 29919     | +    |
| 18777 | 1443285_at   | Region | Gria4               | 14802  | 9    | 4328268   | 4706535   | -    |
| 18778 | 1418730_at   | Region | Rnf12               | 19820  | X    | 98558532  | 98582649  | -    |
| 18779 | 1448509_at   | Region | 3110001A13Rik       | 66540  | 2    | 3630729   | 3699405   | +    |
| 18780 | 1453349_at   | Region | Casz1               | 69743  | 4    | 147393514 | 147437492 | +    |
| 18781 | 1415913_at   | Region | Rps13               | 68052  | 7    | 110187198 | 110189820 | -    |
| 18782 | 1423111_at   | Region | Atp5a1              | 11946  | 18   | 77895834  | 77904683  | +    |
| 18783 | 1421664_a_at | Region | Styx                | 56291  | 14   | 63481864  | 63493914  | +    |
| 18784 | 1429462_at   | Region | MGI:1917156         | 69906  | 15   | 38993909  | 39012345  | -    |
| 18785 | 1448652_at   | Region | Ttc10               | 21821  | 14   | 51955604  | 52049413  | +    |
| 18786 | 1437935_at   | Region | 4930486G11Rik       | 75033  | 9    | 82188987  | 82352734  | +    |
| 18787 | 1449516_a_at | Region | Rgs3                | 50780  | 4    | 61651038  | 61793526  | +    |
| 18788 | 1457545_at   | Region | None                | None   | NONE | NONE      | NONE      | NONE |
| 18789 | 1416979_at   | Region | 2510048O06Rik       | 66537  | 5    | 146752123 | 146767273 | +    |
| 18790 | 1418798_s_at | Region | Stk23               | 56504  | X    | 68435077  | 68439580  | +    |
| 18791 | 1439804_at   | Region | 2310015A10Rik       | 69548  | 12   | 76981780  | 76982965  | -    |
| 18792 | 1420909_at   | Region | Vegfa               | 22339  | 17   | 43526914  | 43541671  | -    |
| 18793 | 1456638_at   | Region | Wdr59               | 319481 | 8    | 110747797 | 110819576 | -    |
| 18794 | 1416458_at   | Region | Arf2                | 11841  | 11   | 103787960 | 103806425 | +    |
| 18795 | 1442744_at   | Region | C79248              | 96982  | 2    | 155626396 | 155626710 | -    |
| 18796 | 1416466_at   | Region | Vapa                | 30960  | 17   | 63289439  | 63322939  | -    |
| 18797 | 1423292_a_at | Region | Prx                 | 19153  | 7    | 22875327  | 22896473  | +    |
| 18798 | 1419434_at   | Region | Slc2a10             | 170441 | 2    | 164960708 | 164976644 | +    |
| 18799 | 1454206_a_at | Region | Adam15              | 11490  | 3    | 89096372  | 89106699  | -    |
| 18800 | 1454975_at   | Region | BC033596            | 216345 | 10   | 115072590 | 115119560 | +    |
| 18801 | 1437391_x_at | Region | Mrpl44              | 69163  | 1    | 80106651  | 80112515  | +    |
| 18802 | 1429756_at   | Region | 4931428F04Rik       | 74356  | 8    | 104576037 | 104584678 | -    |
| 18803 | 1434417_at   | Region | None                | None   | 17   | 23751729  | 23752579  | -    |

|       |              |        |               |        |      |           |           |      |
|-------|--------------|--------|---------------|--------|------|-----------|-----------|------|
| 18804 | 1452909_at   | Region | 2410127E18Rik | 76788  | 6    | 30449002  | 30501701  | +    |
| 18805 | 1445718_at   | Region | Wdfy3         | 72145  | 5    | 100857137 | 101091457 | -    |
| 18806 | 1438229_at   | Region | Pggt1b        | 225467 | 18   | 46460574  | 46501475  | -    |
| 18807 | 1431424_at   | Region | 2810055G20Rik | 77994  | 16   | 12004013  | 12372207  | +    |
| 18808 | 1429235_at   | Region | Galnt12       | 78754  | 14   | 30160461  | 30194395  | +    |
| 18809 | 1418490_at   | Region | Sdsl          | 257635 | 5    | 119610009 | 119624570 | -    |
| 18810 | 1445280_at   | Region | Ap3d1         | 11776  | 10   | 80838692  | 80873927  | -    |
| 18811 | 1452340_at   | Region | 6820424L24Rik | 100515 | 5    | 37416340  | 37432643  | -    |
| 18812 | 1427326_at   | Region | 4732471D19Rik | 319719 | 13   | 53135721  | 53161052  | +    |
| 18813 | 1445558_at   | Region | None          | None   | NONE | NONE      | NONE      | NONE |
| 18814 | 1441458_at   | Region | Rasa4         | 54153  | 5    | 135097409 | 135125352 | +    |
| 18815 | 1423963_at   | Region | Wdr26         | 226757 | 1    | 181127684 | 181165201 | -    |
| 18816 | 1455207_at   | Region | LOC544825     | 544825 | 12   | 3393894   | 3397922   | +    |
| 18817 | 1429719_at   | Region | Foxp4         | 74123  | 17   | 45386201  | 45444354  | -    |
| 18818 | 1421451_at   | Region | Crb1          | 170788 | 1    | 139045517 | 139224215 | -    |
| 18819 | 1437539_at   | Region | Prkaa1        | 105787 | 15   | 4964811   | 4967465   | +    |
| 18820 | 1427966_at   | Region | BC087945      | 432940 | 15   | 27595458  | 27609229  | -    |
| 18821 | 1427466_at   | Region | Cdc911i       | 228812 | 2    | 154735189 | 154814361 | -    |
| 18822 | 1427970_at   | Region | Zfp689        | 71131  | 7    | 121491869 | 121498852 | -    |
| 18823 | 1447294_at   | Region | Fbxw11        | 103583 | 11   | 32537669  | 32641610  | +    |
| 18824 | 1415865_s_at | Region | Bpgm          | 12183  | 6    | 34570624  | 34599878  | +    |
| 18825 | 1436554_at   | Region | Zfpn1a5       | 67143  | 7    | 125704215 | 125726182 | -    |
| 18826 | 1433723_s_at | Region | Serf2         | 378702 | 2    | 120963266 | 120964906 | +    |
| 18827 | 1440893_at   | Region | None          | None   | 13   | 37596012  | 37597959  | +    |
| 18828 | 1440971_x_at | Region | G630024C07Rik | 244216 | 7    | 121294257 | 121304532 | +    |
| 18829 | 1459575_at   | Region | D1ErtD704e    | 51929  | 1    | 179355078 | 179355589 | -    |
| 18830 | 1431508_at   | Region | 4930423M02Rik | 73872  | 4    | 5560260   | 5569431   | +    |
| 18831 | 1438166_x_at | Region | Ndufs4        | 17993  | 13   | 110702711 | 110802452 | -    |
| 18832 | 1426055_a_at | Region | Pigq          | 14755  | 17   | 3046      | 4385      | -    |
| 18833 | 1426382_at   | Region | Ppm1b         | 19043  | 17   | 82787863  | 82846969  | +    |
| 18834 | 1417856_at   | Region | Relb          | 19698  | 7    | 16475466  | 16498682  | -    |
| 18835 | 1446079_at   | Region | Zmat2         | 66492  | 18   | 37017688  | 37023425  | +    |
| 18836 | 1424982_a_at | Region | 2700078E11Rik | 78832  | 19   | 60127914  | 60181028  | -    |
| 18837 | 1451246_s_at | Region | Aurkb         | 20877  | 11   | 68771301  | 68777320  | +    |
| 18838 | 1460743_at   | Region | Tigd5         | 105734 | 15   | 75959829  | 75964603  | +    |
| 18839 | 1432394_a_at | Region | Aatf          | 56321  | 11   | 84150848  | 84241493  | -    |
| 18840 | 1451773_s_at | Region | Polr3f        | 70408  | 2    | 143984692 | 143996204 | +    |
| 18841 | 1457664_x_at | Region | C2            | 12263  | 17   | 32565421  | 32584866  | -    |
| 18842 | 1433429_at   | Region | Pigs          | 276846 | 11   | 78054081  | 78068435  | +    |
| 18843 | 1430745_at   | Region | 5930409G06Rik | 77066  | 3    | 44732166  | 44733710  | -    |
| 18844 | 1416151_at   | Region | Sfrs3         | 20383  | 17   | 26839644  | 26846716  | +    |
| 18845 | 1422705_at   | Region | Tmepai        | 65112  | 2    | 172688256 | 172737000 | -    |
| 18846 | 1439150_x_at | Region | Grtp1         | 66790  | 8    | 12555505  | 12579170  | -    |
| 18847 | 1428271_at   | Region | Acbd4         | 67131  | 11   | 102922863 | 102933289 | +    |
| 18848 | 1451024_at   | Region | Edg6          | 13611  | 10   | 81633943  | 81635602  | -    |
| 18849 | 1452810_at   | Region | 4921521J11Rik | 70885  | 8    | 67943264  | 67976954  | +    |
| 18850 | 1425267_a_at | Region | 3110045G13Rik | 73182  | 3    | 87494202  | 87514047  | -    |
| 18851 | 1424499_s_at | Region | 5730596K20Rik | 109168 | 19   | 7208422   | 7249028   | +    |
| 18852 | 1430619_a_at | Region | Mvk           | 17855  | 5    | 113554875 | 113571160 | +    |
| 18853 | 1460370_at   | Region | Top1mt        | 72960  | 15   | 75707102  | 75728859  | -    |
| 18854 | 1424716_at   | Region | 0610039N19Rik | 67442  | 6    | 72932145  | 72940919  | +    |
| 18855 | 1440881_at   | Region | Brwd3         | 382236 | X    | 103336563 | 103435714 | -    |
| 18856 | 1452432_at   | Region | Tfpi          | 21788  | 2    | 84130609  | 84171923  | -    |
| 18857 | 1443201_at   | Region | Gpc6          | 23888  | 14   | 111487529 | 112531234 | +    |
| 18858 | 1459208_at   | Region | AU021889      | 105972 | 15   | 39577818  | 39578181  | -    |
| 18859 | 1431002_x_at | Region | Fahd2a        | 68126  | 2    | 126950068 | 126958394 | -    |
| 18860 | 1440814_x_at | Region | Hs3st2        | 195646 | 7    | 115360837 | 115377332 | +    |
| 18861 | 1452443_s_at | Region | Helz          | 78455  | 11   | 107369049 | 107508032 | +    |
| 18862 | 1425398_at   | Region | Hist1h2bc     | 68024  | 13   | 23164082  | 23172357  | +    |
| 18863 | 1420119_s_at | Region | AU020177      | 98560  | 1    | 31101687  | 31102046  | -    |
| 18864 | 1416334_at   | Region | Wwox          | 80707  | 8    | 113753199 | 114666211 | +    |
| 18865 | 1425903_at   | Region | Sema6a        | 20358  | 18   | 47470645  | 47528251  | -    |
| 18866 | 1452615_s_at | Region | Tpt1h         | 107328 | 19   | 6710181   | 6712894   | +    |
| 18867 | 1454075_s_at | Region | Nudt13        | 67725  | 14   | 18656034  | 18678071  | +    |
| 18868 | 1417922_at   | Region | Kbtbd4        | 67136  | 2    | 90609535  | 90615309  | +    |

|       |              |        |                   |        |    |           |           |   |
|-------|--------------|--------|-------------------|--------|----|-----------|-----------|---|
| 18869 | 1447000_at   | Region | None              | None   | 11 | 119750353 | 119750873 | - |
| 18870 | 1447847_x_at | Region | None              | None   | 3  | 53142481  | 53142715  | + |
| 18871 | 1420340_at   | Region | 4930413O22Rik     | 67986  | 1  | 10144887  | 10173449  | + |
| 18872 | 1450569_a_at | Region | Rbm14             | 56275  | 19 | 4589715   | 4600375   | - |
| 18873 | 1450898_at   | Region | Hiat1             | 15247  | 3  | 115400100 | 115431486 | - |
| 18874 | 1416053_at   | Region | Lrrn1             | 16979  | 6  | 108031527 | 108072471 | + |
| 18875 | 1440816_x_at | Region | Ddx1              | 104721 | 12 | 12580692  | 12609750  | - |
| 18876 | 1440417_at   | Region | D19Ert409e        | 52016  | 19 | 45318129  | 45318715  | - |
| 18877 | 1434477_at   | Region | Heca              | 380629 | 10 | 17823383  | 17874863  | - |
| 18878 | 1434416_a_at | Region | None              | None   | 17 | 23751729  | 23752579  | - |
| 18879 | 1444303_at   | Region | None              | None   | 19 | 7011503   | 7018205   | + |
| 18880 | 1445509_at   | Region | Atf7              | 223922 | 15 | 102597062 | 102685840 | - |
| 18881 | 1435073_a_at | Region | 4930438O05Rik     | 78795  | 1  | 85961103  | 86084595  | + |
| 18882 | 1423043_s_at | Region | Ddx3x             | 13205  | X  | 11519978  | 11531554  | + |
| 18883 | 1450719_at   | Region | Mep1a             | 17287  | 17 | 40976564  | 41005347  | - |
| 18884 | 1443113_at   | Region | Jmjd2b            | 193796 | 17 | 53963133  | 54039904  | + |
| 18885 | 1416476_a_at | Region | Ube2d2            | 56550  | 18 | 35995272  | 36030828  | + |
| 18886 | 1446929_at   | Region | C76824            | 97128  | 4  | 32524734  | 32525270  | + |
| 18887 | 1439950_at   | Region | Dnchc1            | 13424  | 12 | 106076688 | 106142158 | + |
| 18888 | 1452320_at   | Region | LOC545422         | 545422 | 2  | 69279737  | 69361316  | - |
| 18889 | 1455884_at   | Region | Dpp9              | 224897 | 17 | 53823723  | 53855877  | - |
| 18890 | 1425147_at   | Region | 2410075B13Rik     | 223648 | 15 | 76030756  | 76031978  | - |
| 18891 | 1455552_at   | Region | Snappc4           | 227644 | 2  | 26294936  | 26312781  | - |
| 18892 | 1431792_a_at | Region | Stk11ip           | 71728  | 1  | 75812269  | 75828058  | + |
| 18893 | 1436460_at   | Region | BC030440          | 210035 | 10 | 127413775 | 127431878 | + |
| 18894 | 1443148_at   | Region | Hip2              | 53323  | 5  | 64339100  | 64400757  | + |
| 18895 | 1416465_a_at | Region | Vapa              | 30960  | 17 | 63289439  | 63322939  | - |
| 18896 | 1431453_at   | Region | 4933406K04Rik     | 71033  | 12 | 102156850 | 102167077 | - |
| 18897 | 1428540_at   | Region | 3321401G04Rik     | 77574  | 6  | 42816018  | 42836530  | - |
|       |              |        | Aph1c ///         |        |    |           |           |   |
|       |              |        | 2310057K14Rik /// |        |    |           |           |   |
| 18898 | 1429466_s_at | Region | Aph1b             | 208117 | 9  | 66900639  | 66920575  | - |
| 18899 | 1456868_at   | Region | 2900073G15Rik     | 67268  | 17 | 68765368  | 68773934  | - |
| 18900 | 1419492_s_at | Region | Defb1             | 13214  | 8  | 20528771  | 20547357  | + |
| 18901 | 1448497_at   | Region | Ercc3             | 13872  | 18 | 32480475  | 32510291  | + |
| 18902 | 1440040_at   | Region | Cdk6              | 12571  | 5  | 3350317   | 3528230   | + |
| 18903 | 1448145_at   | Region | Wwp2              | 66894  | 8  | 106734091 | 106856288 | + |
| 18904 | 1441764_at   | Region | Prdm10            | 382066 | 9  | 31203629  | 31300995  | + |
|       |              |        | Ugt1a2 ///        |        |    |           |           |   |
|       |              |        | Ugt1a6a ///       |        |    |           |           |   |
|       |              |        | Ugt1a10 ///       |        |    |           |           |   |
|       |              |        | Ugt1a7c ///       |        |    |           |           |   |
|       |              |        | Ugt1a5 ///        |        |    |           |           |   |
|       |              |        | Ugt1a9 ///        |        |    |           |           |   |
| 18905 | 1424783_a_at | Region | Ugt1a6b ///       | 22236  | 1  | 87889884  | 88038101  | + |
| 18906 | 1420612_s_at | Region | Ptp4a2            | 19244  | 4  | 128866586 | 128877088 | + |
| 18907 | 1430460_at   | Region | 5830410F13Rik     | 74745  | 2  | 12280342  | 12282388  | - |
| 18908 | 1458406_at   | Region | Al429294          | 106580 | 17 | 44879273  | 44880181  | + |
| 18909 | 1448761_a_at | Region | Copg2             | 54160  | 6  | 30849464  | 30936789  | - |
| 18910 | 1443935_at   | Region | BC032203          | 210982 | 17 | 44309813  | 44343803  | - |
| 18911 | 1450767_at   | Region | Nedd9             | 18003  | 13 | 40868522  | 41047402  | - |
| 18912 | 1442298_at   | Region | Bicc1             | 83675  | 10 | 70979053  | 71213601  | - |
| 18913 | 1442471_at   | Region | Ephb2             | 13844  | 4  | 135534865 | 135717192 | - |
| 18914 | 1446855_at   | Region | ---               | 433781 | 4  | 144091609 | 144110244 | - |
| 18915 | 1436904_at   | Region | Thrap1            | 327987 | 11 | 85997437  | 86085517  | - |
| 18916 | 1457276_at   | Region | Snf1lk2           | 235344 | 9  | 50965127  | 51081399  | - |
| 18917 | 1448709_at   | Region | Arid1a            | 93760  | 4  | 132639909 | 132683944 | - |
| 18918 | 1438129_at   | Region | Wsb2              | 59043  | 5  | 116486085 | 116507368 | + |
| 18919 | 1439897_at   | Region | None              | None   | 2  | 17417029  | 17432993  | - |
| 18920 | 1439224_at   | Region | Ankib1            | 70797  | 5  | 3785355   | 3786027   | - |
| 18921 | 1457489_at   | Region | Eif4e             | 13684  | 3  | 137416519 | 137446834 | + |
| 18922 | 1439993_at   | Region | 1200013F24Rik     | 66880  | 3  | 66658030  | 67030708  | + |
| 18923 | 1441993_at   | Region | Ap3s2             | 11778  | 7  | 73672386  | 73717617  | - |
| 18924 | 1444056_at   | Region | 2900006B13Rik     | 72947  | 11 | 51337644  | 51355878  | + |
| 18925 | 1437986_x_at | Region | Fuk               | 234730 | 8  | 110180185 | 110200181 | - |
| 18926 | 1424115_at   | Region | Ppp5c             | 19060  | 7  | 13955563  | 13978781  | - |
| 18927 | 1447272_s_at | Region | Atp10a            | 11982  | 7  | 52936576  | 53107035  | + |

|       |              |        |                   |        |       |           |           |           |   |
|-------|--------------|--------|-------------------|--------|-------|-----------|-----------|-----------|---|
| 18928 | 1446228_at   | Region | D19Wsu12e         | 226090 | 19    | 28862793  | 28936642  | -         |   |
| 18929 | 1436367_at   | Region | None              | None   | 10    | 116077690 | 116078996 | +         |   |
| 18930 | 1426455_at   | Region | Sdccag10          | 67285  | 13    | 100849082 | 101034691 | -         |   |
| 18931 | 1415983_at   | Region | Lcp1              | 18826  | 14    | 69480274  | 69574658  | +         |   |
| 18932 | 1416295_a_at | Region | Il2rg             | 16186  | X     | 95865748  | 95869567  | -         |   |
| 18933 | 1448456_at   | Region | Cln8              | 26889  | 8     | 14267371  | 14278844  | +         |   |
|       |              |        | A930007A09Rik /// |        |       |           |           |           |   |
| 18934 | 1456670_at   | Region | LOC436338         | 432999 | 16    | 12491310  | 12495281  | +         |   |
| 18935 | 1440535_at   | Region | AI415298          | 101555 | 7     | 128059787 | 128060309 | -         |   |
| 18936 | 1435535_at   | Region | Depdc5            | 277854 | 5     | 31352231  | 31444754  | +         |   |
| 18937 | 1442703_at   | Region | AK220484          | 381157 | 18    | 10495274  | 10605827  | +         |   |
| 18938 | 1427633_a_at | Region | Pappa             | 18491  | 4     | 64215365  | 64448700  | +         |   |
| 18939 | 1450543_at   | Region | Myo1h             | 231646 | 5     | 113467384 | 113475145 | +         |   |
| 18940 | 1456460_at   | Region | BC068281          | 238037 | 12    | 4015662   | 4024850   | +         |   |
| 18941 | 1445206_at   | Region | Zw10              | 26951  | 9     | 49086054  | 49109318  | +         |   |
| 18942 | 1450934_at   | Region | Eif4a2            | 13682  | 16    | 21890925  | 21897116  | +         |   |
| 18943 | 1433527_at   | Region | LOC546132         | 546132 | 9     | 54982178  | 55030883  | +         |   |
| 18944 | 1443187_at   | Region | Thsd2             | 72780  | 10    | 29483782  | 29567151  | -         |   |
| 18945 | 1442528_at   | Region | Lats2 ///         | Xpo4   | 50523 | 14        | 52225857  | 52269062  | - |
| 18946 | 1439488_at   | Region | None              | None   | 10    | 80926387  | 80927401  | +         |   |
| 18947 | 1431630_a_at | Region | Klf3              | 16599  | 5     | 63601098  | 63627704  | +         |   |
| 18948 | 1451110_at   | Region | Egln1             | 112405 | 8     | 124195909 | 124203103 | -         |   |
| 18949 | 1434650_at   | Region | Pogz              | 229584 | 3     | 94341777  | 94368636  | +         |   |
| 18950 | 1454725_at   | Region | G430041M01Rik     | 101214 | 6     | 49378306  | 49398393  | -         |   |
| 18951 | 1443340_at   | Region | Cbara1            | 216001 | 10    | 59664687  | 59819557  | +         |   |
| 18952 | 1456646_at   | Region | Gm142             | 230983 | 4     | 153535203 | 153564795 | +         |   |
| 18953 | 1430859_at   | Region | 5330427O13Rik     | 78271  | 14    | 58677127  | 58679379  | -         |   |
| 18954 | 1456816_at   | Region | Rai17             | 328365 | 14    | 23834490  | 24039917  | +         |   |
| 18955 | 1450178_at   | Region | Brdt              | 114642 | 5     | 106401608 | 106456144 | +         |   |
| 18956 | 1456996_at   | Region | 1190005F20Rik     | 98685  | 1     | 151285836 | 151286402 | +         |   |
| 18957 | 1443123_at   | Region | None              | None   | NONE  | NONE      | NONE      | NONE      |   |
| 18958 | 1442465_s_at | Region | Strbp             | 20744  | 2     | 37415390  | 37579381  | -         |   |
| 18959 | 1417202_s_at | Region | Ube1c             | 22200  | 6     | 97650448  | 97671630  | -         |   |
| 18960 | 1443428_at   | Region | None              | None   | NONE  | NONE      | NONE      | NONE      |   |
| 18961 | 1415832_at   | Region | Agtr2             | 11609  | X     | 19723566  | 19728104  | +         |   |
| 18962 | 1426041_a_at | Region | Fgd4              | 224014 | 16    | 15192773  | 15330937  | -         |   |
| 18963 | 1436020_at   | Region | D8Erd457e         | 101994 | 8     | 13248344  | 13259184  | +         |   |
| 18964 | 1424910_at   | Region | Kif12             | 16552  | 4     | 62256828  | 62263322  | -         |   |
| 18965 | 1440575_at   | Region | Hspa4             | 15525  | 11    | 53014415  | 53053230  | -         |   |
| 18966 | 1443557_at   | Region | None              | None   | 18    | 42797108  | 42797640  | +         |   |
| 18967 | 1419037_at   | Region | Csnk2a1           | 12995  | 2     | 151683883 | 151738783 | +         |   |
| 18968 | 1447550_at   | Region | None              | None   | 5     | 105619367 | 105619692 | -         |   |
| 18969 | 1430716_at   | Region | 5330421F07Rik     | 78286  | 7     | 43479111  | 43568752  | +         |   |
| 18970 | 1437656_at   | Region | 9330140K16Rik     | 226970 | 1     | 35071064  | 35082096  | +         |   |
| 18971 | 1432352_at   | Region | 5730405I09Rik     | 67974  | 18    | 9356614   | 9490220   | -         |   |
| 18972 | 1418733_at   | Region | Twist1            | 22160  | 12    | 30570330  | 30572490  | +         |   |
| 18973 | 1447734_x_at | Region | Aldoa             | 11674  | 7     | 120844967 | 120848914 | -         |   |
| 18974 | 1454120_a_at | Region | Pcgf6             | 71041  | 19    | 46584919  | 46602145  | -         |   |
| 18975 | 1451418_a_at | Region | MGI:2183445       | 211949 | 9     | 96842840  | 96917713  | -         |   |
| 18976 | 1442268_a_at | Region | None              | None   | 18    | 68004512  | 68005173  | -         |   |
| 18977 | 1435636_at   | Region | 2310051F07Rik     | 108745 | 15    | 1069902   | 1071573   | +         |   |
| 18978 | 1417995_at   | Region | Ptpn22            | 19260  | 3     | 103287683 | 103339638 | +         |   |
| 18979 | 1445438_at   | Region | Ddhd1             | 114874 | 14    | 40672980  | 40701448  | -         |   |
| 18980 | 1436634_at   | Region | Robo3             | 19649  | 9     | 37357703  | 37371673  | -         |   |
| 18981 | 1448339_at   | Region | Tmem30a           | 69981  | 9     | 79974649  | 79999130  | -         |   |
| 18982 | 1442578_at   | Region | None              | None   | 17    | 54490134  | 54490519  | -         |   |
|       |              |        | Ccnb1-rs1 ///     |        |       | Ccnb1     |           |           |   |
| 18983 | 1448205_at   | Region | Ccnb1-rs1 ///     | Ccnb1  | 12429 | 4         | 117900860 | 117902355 | - |
| 18984 | 1416255_at   | Region | Gja4              | 14612  | 4     | 126338534 | 126341091 | -         |   |
| 18985 | 1450024_at   | Region | Sufu              | 24069  | 19    | 45944301  | 46033419  | +         |   |
| 18986 | 1422968_at   | Region | Ihpk1             | 27399  | 9     | 108070635 | 108116769 | +         |   |
| 18987 | 1446090_at   | Region | 6530409C15Rik     | 76224  | 6     | 28262247  | 28265897  | +         |   |
| 18988 | 1438497_at   | Region | 2810423E13Rik     | 72175  | 3     | 40237869  | 40269375  | -         |   |
| 18989 | 1450448_at   | Region | Stc1              | 20855  | 14    | 63559854  | 63572230  | +         |   |
| 18990 | 1418394_a_at | Region | Cd97              | 26364  | 8     | 82983280  | 83001085  | -         |   |

|       |              |        |               |        |      |           |           |      |
|-------|--------------|--------|---------------|--------|------|-----------|-----------|------|
| 18991 | 1425891_a_at | Region | Grtp1         | 66790  | 8    | 12555505  | 12579170  | -    |
| 18992 | 1450637_a_at | Region | Aebp1         | 11568  | 11   | 5756734   | 5766837   | +    |
| 18993 | 1441748_at   | Region | Zzz3          | 108946 | 3    | 151378383 | 151441249 | +    |
| 18994 | 1451967_x_at | Region | Kpnb1         | 16211  | 11   | 96980801  | 97008707  | -    |
| 18995 | 1415771_at   | Region | Ncl           | 17975  | 1    | 86155962  | 86165711  | -    |
| 18996 | 1454031_at   | Region | 2310029O18Rik | 76946  | 4    | 41316504  | 41318485  | +    |
| 18997 | 1429927_at   | Region | 5830409B07Rik | 76020  | 4    | 131599980 | 131601170 | +    |
| 18998 | 1432593_at   | Region | 4933428P19Rik | 71229  | 10   | 62544079  | 62545398  | -    |
| 18999 | 1449265_at   | Region | Casp1         | 12362  | 9    | 5209682   | 5217161   | +    |
| 19000 | 1460371_at   | Region | Hspa12b       | 72630  | 2    | 130641265 | 130659838 | +    |
| 19001 | 1456158_at   | Region | None          | None   | 4    | 146590799 | 146591631 | -    |
| 19002 | 1418435_at   | Region | Mkrm1         | 54484  | 6    | 39533206  | 39555816  | -    |
| 19003 | 1436711_at   | Region | Actr5         | 109275 | 2    | 158081901 | 158096167 | +    |
| 19004 | 1416739_a_at | Region | Brap          | 72399  | 5    | 120815393 | 120837810 | +    |
| 19005 | 1437410_at   | Region | Aldh2         | 11669  | 5    | 120719784 | 120745669 | -    |
| 19006 | 1431180_at   | Region | 1700123A16Rik | 73610  | NONE | NONE      | NONE      | NONE |
| 19007 | 1426109_a_at | Region | Slc14a2       | 27411  | 18   | 78268796  | 78719616  | -    |
| 19008 | 1451174_at   | Region | Lrrc33        | 224109 | 16   | 30952196  | 30974847  | -    |
| 19009 | 1441855_x_at | Region | Cxcl1         | 14825  | 5    | 90207981  | 90209786  | +    |
| 19010 | 1451303_at   | Region | BC002230      | 217827 | 12   | 95567102  | 95601742  | -    |
| 19011 | 1459655_at   | Region | None          | None   | 16   | 90776954  | 90777241  | -    |
| 19012 | 1452784_at   | Region | Itgav         | 16410  | 2    | 83422264  | 83501556  | +    |
| 19013 | 1443811_at   | Region | Cstf2t        | 83410  | 19   | 30334913  | 30338502  | +    |
| 19014 | 1435900_at   | Region | Zfp297b       | 71834  | 2    | 33385684  | 33400667  | -    |
| 19015 | 1429413_at   | Region | Cpm           | 70574  | 10   | 117346301 | 117376298 | +    |
| 19016 | 1440066_at   | Region | Smarcad1      | 13990  | 6    | 65340694  | 65341270  | +    |
| 19017 | 1425478_x_at | Region | Ube2i         | 22196  | 17   | 23066362  | 23080142  | -    |
| 19018 | 1430438_at   | Region | 8430439J12Rik | 71553  | 5    | 40545923  | 40547797  | -    |
| 19019 | 1433462_a_at | Region | Pi4k2a        | 84095  | 19   | 41634859  | 41666403  | +    |
| 19020 | 1460707_at   | Region | Ptp4a2        | 19244  | 4    | 128866586 | 128877088 | +    |
| 19021 | 1457268_at   | Region | Dot1l         | 208266 | 10   | 80886923  | 80926284  | +    |
| 19022 | 1457891_at   | Region | C230011H18Rik | 399590 | 2    | 6483408   | 6484140   | -    |
| 19023 | 1434780_at   | Region | C130038G02Rik | 77521  | 5    | 147156816 | 147205340 | +    |
| 19024 | 1434475_at   | Region | Ppig          | 228005 | 2    | 69578493  | 69605782  | +    |
| 19025 | 1416990_at   | Region | Rxrb          | 20182  | 17   | 31736002  | 31742955  | +    |
| 19026 | 1444884_at   | Region | 9530043G02Rik | 109338 | 4    | 121883050 | 121883998 | +    |
| 19027 | 1421301_at   | Region | Zic2          | 22772  | 14   | 117045015 | 117049406 | +    |
| 19028 | 1444143_at   | Region | None          | None   | 5    | 149520562 | 149521297 | -    |
| 19029 | 1423335_at   | Region | 1110004F10Rik | 56372  | 7    | 109948983 | 109960813 | +    |
| 19030 | 1424417_at   | Region | 2210415M20Rik | 70160  | 8    | 20945031  | 20970768  | +    |
| 19031 | 1439449_at   | Region | Satb1         | 20230  | 17   | 49274277  | 49367498  | -    |
| 19032 | 1451494_at   | Region | Wac           | 225131 | 18   | 7911809   | 7969644   | +    |
| 19033 | 1457271_at   | Region | Gm131         | 229697 | 3    | 107007124 | 107017561 | -    |
| 19034 | 1458496_at   | Region | Cyb561        | 13056  | 11   | 105754793 | 105765236 | -    |
| 19035 | 1444563_at   | Region | B4galt5       | 56336  | 2    | 166757794 | 166805916 | -    |
| 19036 | 1420934_a_at | Region | Srrm1         | 51796  | 4    | 134203290 | 134234393 | -    |
| 19037 | 1425225_at   | Region | Fcgr3a        | 246256 | 1    | 170954190 | 170964923 | +    |
| 19038 | 1439852_at   | Region | None          | None   | 4    | 83256428  | 83257125  | -    |
| 19039 | 1430951_at   | Region | 2810011L19Rik | 69952  | 12   | 100781129 | 100826247 | +    |
| 19040 | 1423336_at   | Region | Orc4l         | 26428  | 2    | 48835014  | 48881396  | -    |
| 19041 | 1442122_at   | Region | Al451458      | 102916 | X    | 31537925  | 31538503  | -    |
| 19042 | 1421800_at   | Region | Phxr1         | 18686  | 2    | 3349136   | 3349656   | +    |
| 19043 | 1447372_at   | Region | Aldh16a1      | 69748  | 7    | 39218382  | 39231080  | -    |
| 19044 | 1446526_at   | Region | 9330199F22Rik | 105398 | 13   | 93701091  | 93701537  | +    |
| 19045 | 1434313_at   | Region | 6330407D12Rik | 57895  | 6    | 49455597  | 49479041  | +    |
| 19046 | 1441400_at   | Region | 1810029B16Rik | 66282  | 8    | 65585469  | 65595630  | -    |
| 19047 | 1436193_at   | Region | Man1c1        | 230815 | 4    | 133522593 | 133665193 | -    |
| 19048 | 1418745_at   | Region | Omd           | 27047  | 13   | 49182266  | 49192132  | +    |
| 19049 | 1419816_s_at | Region | 1300002F13Rik | 74155  | 4    | 149347453 | 149361242 | +    |
| 19050 | 1438863_at   | Region | A530079E22Rik | 319977 | 1    | 87321824  | 87323030  | -    |
| 19051 | 1453524_at   | Region | 5530401D11Rik | 71360  | 18   | 6276895   | 6278468   | -    |
| 19052 | 1432356_at   | Region | 1700056N10Rik | 73392  | 16   | 15818873  | 15820465  | +    |
| 19053 | 1440886_at   | Region | Cdc37l1       | 67072  | 19   | 28243091  | 28270166  | +    |
| 19054 | 1434563_at   | Region | Rps6kc1       | 320119 | 1    | 190532334 | 190648036 | -    |
| 19055 | 1428189_at   | Region | 5730494M16Rik | 66648  | 18   | 25367107  | 25397117  | -    |

|       |              |        |               |        |      |           |           |      |
|-------|--------------|--------|---------------|--------|------|-----------|-----------|------|
| 19056 | 1444764_at   | Region | A130022J21Rik | 320617 | 17   | 30924776  | 30925455  | +    |
| 19057 | 1425983_x_at | Region | Hipk2         | 15258  | 6    | 38834084  | 39012133  | -    |
| 19058 | 1437601_at   | Region | Otx1          | 18423  | 11   | 21889558  | 21896408  | -    |
| 19059 | 1423036_at   | Region | Txn15         | 52700  | 11   | 71933212  | 71936145  | +    |
| 19060 | 1417314_at   | Region | H2-Bf         | 14962  | 17   | 32559195  | 32565031  | -    |
| 19061 | 1454562_at   | Region | 4930488N24Rik | 75011  | 17   | 12152002  | 12195662  | -    |
| 19062 | 1418334_at   | Region | AA545217      | 27214  | 5    | 8403658   | 8429252   | -    |
| 19063 | 1424927_at   | Region | Glpr1         | 73690  | 10   | 111688463 | 111700201 | -    |
| 19064 | 1427073_at   | Region | Lace1         | 215951 | 10   | 42419265  | 42585094  | -    |
| 19065 | 1432892_at   | Region | 5730564L20Rik | 70651  | 12   | 69507237  | 69509467  | -    |
| 19066 | 1439447_x_at | Region | Rpl37a        | 19981  | 1    | 73012971  | 73015366  | +    |
| 19067 | 1437677_at   | Region | AI449595      | 58901  | 6    | 115465848 | 115466746 | -    |
| 19068 | 1446550_at   | Region | Gspt1         | 14852  | 16   | 10388595  | 10422192  | +    |
| 19069 | 1441029_at   | Region | None          | None   | 17   | 23980037  | 23980641  | +    |
| 19070 | 1437032_x_at | Region | Rbm14         | 56275  | 19   | 4589715   | 4600375   | -    |
| 19071 | 1458410_at   | Region | Garn1         | 56784  | 12   | 52323288  | 52540884  | -    |
| 19072 | 1442059_at   | Region | Fxr1h         | 14359  | 3    | 33467491  | 33516721  | +    |
| 19073 | 1458529_at   | Region | LOC215714     | 215714 | 1    | 135435245 | 135450422 | +    |
| 19074 | 1420419_a_at | Region | Otof          | 83762  | 5    | 28825257  | 28920848  | -    |
| 19075 | 1444743_at   | Region | Oact2         | 67216  | 12   | 21381378  | 21511358  | +    |
| 19076 | 1442341_at   | Region | LOC545157     | 545157 | 16   | 33041252  | 33041602  | -    |
| 19077 | 1429399_at   | Region | Rnf125        | 67664  | 18   | 21159553  | 21198776  | +    |
| 19078 | 1447744_s_at | Region | None          | None   | 9    | 40293613  | 40293854  | +    |
| 19079 | 1427116_at   | Region | BC010250      | 233904 | 7    | 121846214 | 121849933 | +    |
| 19080 | 1442618_at   | Region | Ldh2          | 16832  | 6    | 143333518 | 143351212 | -    |
| 19081 | 1440013_at   | Region | Trim44        | 80985  | 2    | 102009026 | 102105530 | -    |
| 19082 | 1460297_at   | Region | Nphs2         | 170484 | 1    | 156209762 | 156226998 | +    |
| 19083 | 1449115_at   | Region | Mtf2          | 17765  | 5    | 107157468 | 107177436 | +    |
| 19084 | 1443316_at   | Region | None          | None   | 9    | 61064691  | 61065335  | +    |
| 19085 | 1438063_at   | Region | Mphosph9      | 269702 | 5    | 123422304 | 123499213 | -    |
| 19086 | 1449444_a_at | Region | Mfap1         | 67532  | 2    | 121007192 | 121020508 | -    |
| 19087 | 1442100_at   | Region | Inpp5f        | 101490 | 7    | 122660050 | 122745896 | +    |
| 19088 | 1418200_at   | Region | Hkr3          | 100090 | 4    | 150512136 | 150520020 | -    |
| 19089 | 1415746_at   | Region | Cic           | 71722  | 7    | 20463051  | 20474387  | +    |
| 19090 | 1420910_at   | Region | Ppap2c        | 50784  | 10   | 79648047  | 79654486  | -    |
| 19091 | 1428197_at   | Region | Tspan9        | 109246 | 6    | 128652920 | 128772541 | -    |
| 19092 | 1458615_at   | Region | Depdc5        | 277854 | 5    | 31352231  | 31444754  | +    |
| 19093 | 1457176_at   | Region | Garn1         | 56784  | 12   | 52323288  | 52540884  | -    |
| 19094 | 1437747_at   | Region | Ube4a         | 140630 | 9    | 44921926  | 44954380  | -    |
| 19095 | 1455193_at   | Region | Zbtb8         | 215627 | 4    | 128453383 | 128460424 | -    |
| 19096 | 1441399_at   | Region | 4933400E14Rik | 71007  | 7    | 128633927 | 128709638 | -    |
| 19097 | 1454903_at   | Region | None          | None   | 11   | 95389915  | 95390859  | -    |
| 19098 | 1431000_at   | Region | 2310002B06Rik | 53951  | 17   | 76657865  | 76667596  | +    |
| 19099 | 1438884_at   | Region | D830007B15Rik | 330096 | 5    | 66374549  | 66380118  | +    |
| 19100 | 1416680_at   | Region | Ube3a         | 22215  | 7    | 53507062  | 53583196  | +    |
| 19101 | 1428800_a_at | Region | 3000003F02Rik | 78895  | 15   | 94591343  | 94612193  | -    |
| 19102 | 1428100_at   | Region | Sfrs1         | 110809 | 11   | 87775771  | 87779641  | +    |
| 19103 | 1460467_at   | Region | lqcg          | 69707  | 16   | 31823437  | 31864222  | -    |
| 19104 | 1444305_at   | Region | LOC381400     | 381400 | 2    | 155085997 | 155091244 | +    |
| 19105 | 1430092_at   | Region | Serac1        | 321007 | 17   | 5950429   | 5986100   | -    |
| 19106 | 1415726_at   | Region | Ankrd17       | 81702  | 5    | 89524594  | 89663613  | -    |
| 19107 | 1430217_at   | Region | 4921528H16Rik | 74354  | 6    | 34120464  | 34227989  | +    |
| 19108 | 1453400_at   | Region | 4933428D01Rik | 71200  | 14   | 39195997  | 39216086  | -    |
| 19109 | 1443398_at   | Region | Snap25        | 20614  | 2    | 136289818 | 136290331 | +    |
| 19110 | 1442905_at   | Region | None          | None   | 14   | 24754304  | 24754736  | +    |
| 19111 | 1431043_at   | Region | Kbtbd5        | 72330  | 9    | 121792117 | 121793371 | +    |
| 19112 | 1445186_at   | Region | Stc2          | 20856  | 11   | 31254231  | 31264851  | -    |
| 19113 | 1444478_at   | Region | 2900057D21Rik | 72993  | 14   | 25057193  | 25108756  | -    |
| 19114 | 1420727_a_at | Region | Tmlhe         | 192289 | X    | 1320      | 3062      | +    |
| 19115 | 1433487_at   | Region | Clcn3         | 12725  | 8    | 59960629  | 60030782  | -    |
| 19116 | 1443248_at   | Region | B230339H12Rik | 234076 | 8    | 12666914  | 12700030  | +    |
| 19117 | 1429245_at   | Region | 2510022D24Rik | 66567  | NONE | NONE      | NONE      | NONE |
| 19118 | 1443626_at   | Region | None          | None   | 6    | 54408285  | 54408751  | +    |
| 19119 | 1430042_at   | Region | A930012M21Rik | 77954  | 7    | 119761889 | 119763594 | +    |
| 19120 | 1438424_at   | Region | C530046L02Rik | 224617 | 17   | 21982357  | 22009100  | -    |

|       |              |        |               |        |      |           |           |      |
|-------|--------------|--------|---------------|--------|------|-----------|-----------|------|
| 19121 | 1430571_s_at | Region | Armc6         | 76813  | 8    | 69373170  | 69384382  | -    |
| 19122 | 1445768_at   | Region | LOC544965     | 544965 | 13   | 92978853  | 93024229  | +    |
| 19123 | 1440977_at   | Region | Akap13        | 233400 | 7    | 69488734  | 69518761  | +    |
| 19124 | 1424532_at   | Region | Ylpm1         | 56531  | 12   | 81865083  | 81939186  | +    |
| 19125 | 1449097_at   | Region | Txnrd2        | 26462  | 16   | 17197467  | 17250120  | +    |
| 19126 | 1440870_at   | Region | Prdm16        | 70673  | 4    | 152812654 | 153021293 | -    |
| 19127 | 1458509_at   | Region | Mre11a        | 17535  | 9    | 14618147  | 14667859  | +    |
| 19128 | 1440141_at   | Region | Kcnq2         | 16536  | 2    | 180792537 | 180852183 | -    |
| 19129 | 1441232_at   | Region | None          | None   | 6    | 29069779  | 29070415  | +    |
| 19130 | 1417003_at   | Region | 0610012G03Rik | 106264 | 16   | 30756422  | 30757865  | -    |
| 19131 | 1426779_x_at | Region | Dag1          | 13138  | 9    | 108271876 | 108333355 | -    |
| 19132 | 1443603_at   | Region | A030012M09Rik | 319263 | 1    | 7090301   | 7142844   | +    |
| 19133 | 1421135_a_at | Region | Cnot8         | 69125  | 11   | 57829782  | 57844223  | +    |
| 19134 | 1441775_at   | Region | Wdr7          | 104082 | 18   | 63940854  | 64221039  | +    |
| 19135 | 1424217_at   | Region | Papola        | 18789  | 12   | 101247264 | 101284473 | +    |
| 19136 | 1457580_at   | Region | Chd8          | 67772  | 14   | 47298256  | 47322726  | -    |
| 19137 | 1445559_at   | Region | None          | None   | NONE | NONE      | NONE      | NONE |
| 19138 | 1419963_at   | Region | Depdc6        | 97998  | 15   | 55114270  | 55254734  | +    |
| 19139 | 1431520_at   | Region | 4933406J09Rik | 74064  | 6    | 135065548 | 135160020 | -    |
| 19140 | 1455099_at   | Region | Mogat2        | 233549 | 7    | 93310449  | 93329968  | -    |
| 19141 | 1459274_at   | Region | None          | None   | 12   | 68907075  | 68907754  | -    |
| 19142 | 1446221_at   | Region | None          | None   | NONE | NONE      | NONE      | NONE |
| 19143 | 1418722_at   | Region | Ngp           | 18054  | 9    | 110461384 | 110464545 | +    |
| 19144 | 1437473_at   | Region | Maf           | 17132  | 8    | 115016686 | 115019625 | -    |
| 19145 | 1451818_at   | Region | Mib1          | 225164 | 18   | 10770969  | 10857561  | +    |
| 19146 | 1452044_at   | Region | Arpc5l        | 74192  | 2    | 38940301  | 38948034  | +    |
| 19147 | 1456370_s_at | Region | 0610037L13Rik | 74098  | 4    | 106848804 | 106856707 | +    |
| 19148 | 1452617_at   | Region | Ssbp1         | 381760 | 6    | 40612256  | 40622665  | +    |
| 19149 | 1445662_x_at | Region | ---           | 385300 | NONE | NONE      | NONE      | NONE |
| 19150 | 1417881_at   | Region | Slc39a3       | 106947 | 10   | 81162385  | 81167757  | -    |
| 19151 | 1458383_at   | Region | ldh2          | 269951 | 7    | 73893703  | 73914172  | -    |
| 19152 | 1444344_at   | Region | None          | None   | 13   | 9683953   | 9684900   | +    |
| 19153 | 1417450_a_at | Region | Tacc3         | 21335  | 5    | 32147518  | 32160849  | +    |
| 19154 | 1419624_a_at | Region | 1700010I14Rik | 66931  | 17   | 7625204   | 7645159   | +    |
| 19155 | 1429304_at   | Region | Ankrd10       | 102334 | 8    | 10984009  | 11008115  | -    |
| 19156 | 1454601_at   | Region | 8030497O21Rik | 77506  | NONE | NONE      | NONE      | NONE |
| 19157 | 1444465_at   | Region | Ube4b         | 63958  | 4    | 147820778 | 147919111 | -    |
| 19158 | 1456313_x_at | Region | Mrpl28        | 68611  | 17   | 23916702  | 23919783  | +    |
| 19159 | 1423838_s_at | Region | 2400003C14Rik | 71955  | 8    | 108969005 | 108990940 | -    |
| 19160 | 1421389_a_at | Region | Eif2ak4       | 27103  | 2    | 117902466 | 117989082 | +    |
| 19161 | 1432554_at   | Region | 2310040G07Rik | 70284  | 5    | 76172827  | 76173305  | +    |
| 19162 | 1458809_at   | Region | None          | None   | NONE | NONE      | NONE      | NONE |
| 19163 | 1436211_at   | Region | Thoc4         | 21681  | 11   | 120415609 | 120419458 | -    |
| 19164 | 1436704_x_at | Region | Mthfd1        | 108156 | 12   | 73111496  | 73175891  | +    |
| 19165 | 1442372_at   | Region | None          | None   | 17   | 73342445  | 73343167  | -    |
| 19166 | 1460523_at   | Region | None          | None   | 13   | 24151993  | 24152957  | +    |
| 19167 | 1430264_at   | Region | 2610030P05Rik | 69258  | 2    | 38150530  | 38152000  | -    |
| 19168 | 1444259_at   | Region | AW495222      | 105364 | 13   | 89890163  | 89903238  | -    |
| 19169 | 1434391_at   | Region | Hnrpu         | 51810  | 1    | 178283700 | 178291584 | -    |
| 19170 | 1447608_x_at | Region | Btbd14a       | 67991  | 2    | 25991155  | 26054942  | -    |
| 19171 | 1452422_a_at | Region | Snrpb2        | 20639  | 2    | 142525198 | 142528988 | +    |
| 19172 | 1447940_a_at | Region | Braf          | 109880 | 6    | 39749542  | 39860924  | -    |
| 19173 | 1441206_at   | Region | Synpo2        | 118449 | 3    | 121904047 | 121951604 | -    |
| 19174 | 1438408_at   | Region | 5730467H21Rik | 78088  | 5    | 92376921  | 92380701  | -    |
| 19175 | 1437818_at   | Region | 9430016H08Rik | 68115  | 1    | 57710278  | 57721683  | +    |
| 19176 | 1439212_at   | Region | 6820429M01    | 233905 | 7    | 121927511 | 121935806 | +    |
| 19177 | 1424705_at   | Region | Rbmx2         | 209003 | X    | 43215800  | 43231515  | +    |
| 19178 | 1455853_x_at | Region | Sas           | 67125  | 10   | 126800009 | 126802980 | -    |
| 19179 | 1434479_at   | Region | AI413331      | 98940  | 2    | 27970650  | 27971677  | +    |
| 19180 | 1441411_at   | Region | Lims1         | 110829 | 10   | 58281059  | 58380568  | +    |
| 19181 | 1429808_at   | Region | 1110020C03Rik | 68625  | 4    | 117513456 | 117528352 | -    |
| 19182 | 1442774_x_at | Region | None          | None   | NONE | NONE      | NONE      | NONE |
| 19183 | 1436490_x_at | Region | Ran           | 19384  | 5    | 128195181 | 128199286 | +    |
| 19184 | 1442558_at   | Region | None          | None   | 12   | 112907529 | 112914136 | -    |
| 19185 | 1428950_s_at | Region | Nol8          | 70930  | 13   | 49249941  | 49275842  | +    |

|       |              |        |               |        |    |           |           |   |
|-------|--------------|--------|---------------|--------|----|-----------|-----------|---|
| 19186 | 1440634_at   | Region | Gpc6          | 23888  | 14 | 111487529 | 112531234 | + |
| 19187 | 1418747_at   | Region | Sspi1         | 20375  | 2  | 90801546  | 90820505  | + |
| 19188 | 1452319_at   | Region | Zfp82         | 330502 | 7  | 25473958  | 25487536  | - |
| 19189 | 1424868_at   | Region | Glyat         | 107146 | 19 | 11829393  | 11847822  | + |
| 19190 | 1456976_at   | Region | Wnt5a         | 22418  | 14 | 26642805  | 26662537  | + |
| 19191 | 1430604_a_at | Region | Dab2          | 13132  | 15 | 6175647   | 6229535   | + |
| 19192 | 1447280_at   | Region | Dtna          | 13527  | 18 | 23643946  | 23881842  | + |
| 19193 | 1420333_at   | Region | Txndc8        | 67402  | 4  | 57927478  | 57952573  | - |
| 19194 | 1458293_at   | Region | Hmox2         | 15369  | 16 | 4413295   | 4438825   | + |
| 19195 | 1443411_at   | Region | 1700030K01Rik | 75571  | 13 | 72024848  | 72056077  | + |
| 19196 | 1436284_s_at | Region | None          | None   | 8  | 94607184  | 94607824  | - |
| 19197 | 1422595_s_at | Region | 5730470L24Rik | 66641  | 3  | 102423707 | 102431881 | + |
| 19198 | 1430063_at   | Region | 4930571K23Rik | 75861  | 7  | 119419569 | 119420745 | + |
| 19199 | 1417264_at   | Region | D5Ertd33e     | 52064  | 5  | 114389328 | 114406598 | + |
| 19200 | 1457770_at   | Region | Slc39a14      | 213053 | 14 | 64619456  | 64667414  | - |
| 19201 | 1443877_a_at | Region | Rapgef6       | 192786 | 11 | 54384103  | 54395691  | + |
| 19202 | 1430404_at   | Region | 4833416J08Rik | 75771  | 7  | 17482750  | 17484811  | - |
| 19203 | 1436091_at   | Region | 2810022L02Rik | 67198  | 1  | 58079733  | 58253199  | + |
| 19204 | 1427368_x_at | Region | Fes           | 14159  | 7  | 74178215  | 74187851  | - |
| 19205 | 1443408_at   | Region | Plk1          | 18817  | 7  | 116037351 | 116047721 | + |
| 19206 | 1458900_at   | Region | None          | None   | 2  | 144669552 | 144670182 | + |
| 19207 | 1447555_at   | Region | Utrn          | 22288  | 10 | 12263109  | 12646998  | - |
| 19208 | 1421706_at   | Region | Mmp20         | 30800  | 9  | 7622916   | 7669655   | + |
| 19209 | 1417350_at   | Region | Pldn          | 18457  | 2  | 122252366 | 122261952 | + |
| 19210 | 1430965_at   | Region | 9430064K01Rik | 77294  | 10 | 69744425  | 69745520  | + |
| 19211 | 1445398_at   | Region | 3732412D22Rik | 77569  | 5  | 65624008  | 65822238  | + |
| 19212 | 1440324_at   | Region | Mrpl19        | 56284  | 6  | 82245436  | 82301881  | - |
| 19213 | 1432086_a_at | Region | Ribc2         | 67747  | 15 | 85180677  | 85193168  | + |
| 19214 | 1439954_at   | Region | 6430514M23Rik | 399595 | 1  | 132063053 | 132063579 | + |
| 19215 | 1430415_at   | Region | Phf6          | 70998  | X  | 47433062  | 47477739  | + |
| 19216 | 1437847_x_at | Region | Rbmx          | 19655  | X  | 52141072  | 52147740  | - |
| 19217 | 1446278_at   | Region | Utx           | 22289  | X  | 16401607  | 16518298  | + |
| 19218 | 1441617_at   | Region | Pcqap         | 94112  | 16 | 16422190  | 16493791  | - |
| 19219 | 1456169_at   | Region | LOC226654     | 226654 | 1  | 171347872 | 171349193 | + |
| 19220 | 1440288_at   | Region | LOC545719     | 545719 | 4  | 146732892 | 146780309 | - |
| 19221 | 1419086_at   | Region | Fgfbp1        | 14181  | 5  | 42735916  | 42738818  | - |
| 19222 | 1459659_at   | Region | Zfp131        | 72465  | 13 | 10118     | 57012     | + |
| 19223 | 1438474_at   | Region | Ankrd35       | 213121 | 3  | 96157967  | 96178304  | + |
| 19224 | 1453336_at   | Region | 3830405G04Rik | 70681  | 5  | 99825455  | 99841588  | - |
| 19225 | 1428999_at   | Region | Phf3          | 213109 | 1  | 31075361  | 31146157  | - |
| 19226 | 1429797_at   | Region | 5730596K20Rik | 109168 | 19 | 7208422   | 7249028   | + |
| 19227 | 1444005_at   | Region | None          | None   | 2  | 33704058  | 33704844  | - |
| 19228 | 1440495_at   | Region | Dmt2          | 110333 | 10 | 92050243  | 92051272  | - |
| 19229 | 1448539_a_at | Region | Acy3          | 71670  | 19 | 3775451   | 3778797   | + |
| 19230 | 1440178_x_at | Region | Zap70         | 22637  | 1  | 37056452  | 37077407  | + |
| 19231 | 1437157_at   | Region | None          | None   | 1  | 164371337 | 164376031 | + |
| 19232 | 1455155_at   | Region | BC040823      | 241846 | 2  | 179743356 | 179751614 | + |
| 19233 | 1455777_x_at | Region | Hsd17b4       | 15488  | 18 | 50343439  | 50411362  | + |
| 19234 | 1439600_at   | Region | BC004012      | 192185 | 4  | 154054766 | 154083359 | + |
| 19235 | 1435169_at   | Region | A930001N09Rik | 77128  | 17 | 24510472  | 24568084  | + |
| 19236 | 1448969_at   | Region | Ftsj2         | 68017  | 5  | 139324014 | 139328238 | - |
| 19237 | 1428861_at   | Region | 4631422O05Rik | 78749  | 16 | 56262180  | 56481521  | + |
| 19238 | 1422706_at   | Region | Tmepai        | 65112  | 2  | 172688256 | 172737000 | - |
| 19239 | 1445868_at   | Region | Cpeb3         | 208922 | 19 | 36366605  | 36550135  | - |
| 19240 | 1421893_a_at | Region | Tpp2          | 22019  | 1  | 44229826  | 44298790  | + |
| 19241 | 1441159_at   | Region | Med12l        | 329650 | 3  | 58907051  | 58912332  | + |
| 19242 | 1420737_at   | Region | Pmfbbp1       | 56523  | 8  | 108791703 | 108840316 | + |
| 19243 | 1449282_at   | Region | Cysltr1       | 58861  | X  | 101177882 | 101204827 | - |
| 19244 | 1427516_a_at | Region | Boc           | 117606 | 16 | 43368375  | 43441912  | - |
| 19245 | 1453951_a_at | Region | 4930463G05Rik | 70806  | 19 | 47337880  | 47388682  | - |
| 19246 | 1443250_at   | Region | None          | None   | 1  | 143831400 | 143832062 | - |
| 19247 | 1422976_x_at | Region | Ndufa7        | 66416  | 17 | 31523009  | 31536811  | + |
| 19248 | 1423616_at   | Region | Tarbp2        | 21357  | 15 | 102578878 | 102584093 | + |
| 19249 | 1436851_at   | Region | Pkn1          | 320795 | 8  | 82930012  | 82959042  | - |
| 19250 | 1450720_at   | Region | Acp1          | 11431  | 12 | 27469324  | 27487670  | - |



|       |              |        |               |        |      |           |           |      |
|-------|--------------|--------|---------------|--------|------|-----------|-----------|------|
| 19251 | 1418061_at   | Region | Ltbp2         | 16997  | 12   | 81651887  | 81745207  | -    |
| 19252 | 1424339_at   | Region | Oasl1         | 231655 | 5    | 114032866 | 114047537 | +    |
| 19253 | 1438731_at   | Region | None          | None   | 11   | 119164523 | 119165402 | -    |
| 19254 | 1428492_at   | Region | Glpr2         | 384009 | 4    | 43873624  | 43895040  | +    |
| 19255 | 1430665_at   | Region | 5730480H06Rik | 70592  | 5    | 47159396  | 47178118  | +    |
| 19256 | 1446625_at   | Region | 1810057C19Rik | 67888  | 11   | 89851435  | 89857592  | +    |
| 19257 | 1455359_at   | Region | C130080N23Rik | 226829 | 1    | 189588471 | 189591536 | +    |
| 19258 | 1456319_at   | Region | X83313        | 13957  | NONE | NONE      | NONE      | NONE |
| 19259 | 1427462_at   | Region | E2f3          | 13557  | 13   | 29386198  | 29468641  | -    |
| 19260 | 1453780_at   | Region | None          | None   | 13   | 113671004 | 113673398 | -    |
| 19261 | 1437399_at   | Region | 1110019C08Rik | 224250 | 16   | 57715966  | 57722159  | +    |
| 19262 | 1456539_at   | Region | None          | None   | NONE | NONE      | NONE      | NONE |
| 19263 | 1447874_x_at | Region | Smpd1         | 20597  | 7    | 99666853  | 99670820  | +    |
| 19264 | 1436236_x_at | Region | Cotl1         | 72042  | 8    | 119165392 | 119197206 | -    |
| 19265 | 1418620_at   | Region | Phox2a        | 11859  | 7    | 95924390  | 95928627  | +    |
| 19266 | 1431596_at   | Region | None          | None   | 9    | 83475771  | 83477134  | +    |
| 19267 | 1421119_at   | Region | Kif21b        | 16565  | 1    | 135978315 | 136024892 | +    |
| 19268 | 1421710_at   | Region | Zfp92         | 22754  | X    | 68071751  | 68084810  | +    |
| 19269 | 1441164_at   | Region | None          | None   | 18   | 39289221  | 39289982  | +    |
| 19270 | 1419029_at   | Region | Ero1l         | 50527  | 14   | 950       | 11169     | +    |
| 19271 | 1442057_at   | Region | AA986695      | 98247  | 1    | 86041449  | 86041741  | +    |
| 19272 | 1451211_a_at | Region | Lgtn          | 16865  | 1    | 131002708 | 131021706 | +    |
| 19273 | 1434942_at   | Region | 2610101J03Rik | 66580  | 2    | 139633736 | 139684417 | -    |
| 19274 | 1422988_at   | Region | Sgsh          | 27029  | 11   | 119164585 | 119176595 | -    |
| 19275 | 1438697_at   | Region | 4632425D07Rik | 208213 | 5    | 126411362 | 126733552 | +    |
| 19276 | 1419567_at   | Region | Fank1         | 66930  | 7    | 128144543 | 128249184 | +    |
| 19277 | 1429236_at   | Region | Galntl2       | 78754  | 14   | 30160461  | 30194395  | +    |
| 19278 | 1423656_x_at | Region | 1500010J02Rik | 68964  | 11   | 68751840  | 68762132  | +    |
| 19279 | 1430247_at   | Region | Daam2         | 76441  | 17   | 46989103  | 47096816  | -    |
| 19280 | 1425725_s_at | Region | Ppp2r5c       | 26931  | 12   | 105961123 | 106055786 | +    |
| 19281 | 1440267_at   | Region | E330005K07Rik | 320623 | 5    | 3623342   | 3624129   | +    |
| 19282 | 1437425_at   | Region | Gdap1         | 14545  | 1    | 17329856  | 17348730  | +    |
| 19283 | 1433942_at   | Region | Myo6          | 17920  | 9    | 80370873  | 80516811  | +    |
| 19284 | 1459171_at   | Region | None          | None   | 6    | 136125659 | 136126364 | +    |
| 19285 | 1452586_at   | Region | Anapc13       | 69010  | 9    | 102575670 | 102583591 | +    |
| 19286 | 1450086_at   | Region | Gmeb1         | 56809  | 4    | 131021904 | 131048737 | -    |
| 19287 | 1454383_at   | Region | 5430434G16Rik | 71385  | 15   | 36252623  | 36253976  | +    |
| 19288 | 1418658_at   | Region | 2410005O16Rik | 66302  | 4    | 19502173  | 19533898  | +    |
| 19289 | 1439535_at   | Region | Dstn          | 56431  | 2    | 143372547 | 143400260 | +    |
| 19290 | 1433661_at   | Region | BC034204      | 270151 | 9    | 44241572  | 44257253  | -    |
| 19291 | 1455817_x_at | Region | None          | None   | NONE | NONE      | NONE      | NONE |
| 19292 | 1440931_at   | Region | LOC545474     | 545474 | 2    | 151550295 | 151552735 | +    |
| 19293 | 1449633_s_at | Region | C330027I04Rik | 68106  | 11   | 100243408 | 100262161 | -    |
| 19294 | 1457376_at   | Region | Itga4         | 16401  | 2    | 78953394  | 79028523  | +    |
| 19295 | 1441701_at   | Region | Zfp148        | 22661  | 16   | 32188918  | 32308456  | +    |
| 19296 | 1424219_at   | Region | A530065E19Rik | 217038 | 11   | 84541053  | 84547507  | -    |
| 19297 | 1450308_a_at | Region | Xrn1          | 24127  | 9    | 95858413  | 95956167  | +    |
| 19298 | 1453778_at   | Region | 2810407C02Rik | 69227  | 3    | 58220979  | 58236191  | +    |
| 19299 | 1428049_a_at | Region | Nudt16l1      | 66911  | 16   | 4609000   | 4610909   | +    |
| 19300 | 1425100_a_at | Region | Pde6g         | 18588  | 11   | 120268703 | 120274576 | -    |
| 19301 | 1454397_at   | Region | 4632418H02Rik | 78265  | 9    | 122147976 | 122150177 | +    |
| 19302 | 1423769_at   | Region | Ptcd2         | 68927  | 13   | 95508567  | 95533596  | -    |
| 19303 | 1427081_at   | Region | A630072M18Rik | 320770 | 5    | 19403559  | 19405868  | +    |
| 19304 | 1431601_at   | Region | LOC547315     | 547315 | 10   | 51562     | 55838     | -    |
| 19305 | 1422088_at   | Region | Lmyc1         | 16918  | 4    | 122023211 | 122029597 | +    |
| 19306 | 1458729_at   | Region | Fkbp4         | 14228  | 6    | 129120294 | 129128818 | -    |
| 19307 | 1453239_a_at | Region | Ankrd22       | 52024  | 19   | 33450964  | 33497153  | -    |
| 19308 | 1440810_x_at | Region | LOC433524     | 433524 | 2    | 175111912 | 175117397 | -    |
| 19309 | 1441482_at   | Region | None          | None   | 11   | 110220839 | 110221524 | +    |
| 19310 | 1459705_at   | Region | Olfm3         | 229759 | 3    | 113850919 | 113895474 | +    |
| 19311 | 1445918_at   | Region | Tmem2         | 83921  | 19   | 21045338  | 21094911  | +    |
| 19312 | 1444554_at   | Region | None          | None   | 15   | 80964789  | 80965321  | +    |
| 19313 | 1424684_at   | Region | Rab5c         | 19345  | 11   | 100536098 | 100559277 | -    |
| 19314 | 1457214_at   | Region | None          | None   | 2    | 165459192 | 165459675 | +    |
| 19315 | 1416045_a_at | Region | Smarcb1       | 20587  | 10   | 75998515  | 76023328  | -    |

|       |              |        |                   |        |      |           |           |      |
|-------|--------------|--------|-------------------|--------|------|-----------|-----------|------|
| 19316 | 1416364_at   | Region | Hspcb             | 15516  | 17   | 43078708  | 43084593  | -    |
| 19317 | 1438122_at   | Region | None              | None   | 12   | 81296762  | 81302137  | +    |
| 19318 | 1420690_at   | Region | Fgf10             | 14165  | 13   | 7290      | 84381     | +    |
| 19319 | 1434950_a_at | Region | Armc8             | 74125  | 9    | 99381642  | 99469875  | -    |
| 19320 | 1443457_at   | Region | A230055J12Rik     | 320314 | 5    | 80771250  | 80771843  | +    |
| 19321 | 1460096_at   | Region | Lamp1             | 16783  | 8    | 12537914  | 12553973  | +    |
| 19322 | 1457627_x_at | Region | Ropn1l            | 252967 | 15   | 31441819  | 31454253  | -    |
| 19323 | 1441203_at   | Region | None              | None   | 2    | 158055142 | 158055821 | -    |
| 19324 | 1459301_at   | Region | Mrg1              | 17536  | 2    | 115376917 | 115578960 | -    |
| 19325 | 1416288_at   | Region | Dnaja1            | 15502  | 4    | 40861384  | 40873815  | +    |
| 19326 | 1445892_at   | Region | Per2              | 18627  | 1    | 91239024  | 91282480  | -    |
| 19327 | 1436843_at   | Region | C430048L16Rik     | 77604  | 4    | 12022506  | 12023317  | +    |
| 19328 | 1435955_at   | Region | Siglec10          | 243958 | 7    | 37483033  | 37493112  | +    |
| 19329 | 1436687_x_at | Region | 3110006P09Rik     | 68036  | 15   | 36999940  | 37010315  | -    |
| 19330 | 1441534_at   | Region | C86753            | 97833  | 12   | 95398236  | 95398854  | -    |
| 19331 | 1419340_at   | Region | Mov10l1           | 83456  | 15   | 89037487  | 89107077  | +    |
| 19332 | 1442477_at   | Region | None              | None   | 2    | 91615049  | 91615930  | +    |
| 19333 | 1420160_s_at | Region | Myo1e             | 71602  | 9    | 70344868  | 70497375  | +    |
| 19334 | 1444038_at   | Region | AU015836          | 385493 | X    | 88629353  | 88636128  | +    |
| 19335 | 1425205_at   | Region | Ddx19b            | 234733 | 8    | 110304375 | 110325446 | -    |
| 19336 | 1447486_at   | Region | Ppp1r9b           | 217124 | 11   | 94812299  | 94827971  | +    |
| 19337 | 1440529_at   | Region | None              | None   | 2    | 178709014 | 178727397 | +    |
| 19338 | 1440745_at   | Region | C130091E20        | 330006 | 4    | 152810842 | 152811305 | -    |
| 19339 | 1456963_at   | Region | 1110039B18Rik     | 68796  | 5    | 29328591  | 29336411  | +    |
| 19340 | 1445090_at   | Region | None              | None   | 10   | 49330125  | 49330696  | -    |
| 19341 | 1458292_at   | Region | Psma1             | 26440  | 7    | 108067002 | 108132938 | -    |
| 19342 | 1421980_at   | Region | Kcnc3             | 16504  | 7    | 38665933  | 38671377  | +    |
| 19343 | 1447631_at   | Region | Myst2             | 217127 | 11   | 95095346  | 95131288  | -    |
| 19344 | 1423019_at   | Region | Gja9              | 14617  | 2    | 113523441 | 113527459 | -    |
|       |              |        | 4930523C11Rik /// |        |      |           |           |      |
| 19345 | 1436130_s_at | Region | Adam6             | 238405 | 12   | 108966267 | 108968537 | +    |
| 19346 | 1437633_at   | Region | Ankrd11           | 77087  | 8    | 122264618 | 122423554 | -    |
| 19347 | 1428023_at   | Region | 3110009E18Rik     | 73103  | 1    | 119908371 | 119945964 | +    |
| 19348 | 1439989_at   | Region | Tsc1              | 64930  | 2    | 28573403  | 28619515  | +    |
| 19349 | 1457105_at   | Region | Pkd2l1            | 329064 | 19   | 43692043  | 43736814  | -    |
| 19350 | 1427214_at   | Region | Agmat             | 75986  | 4    | 140628016 | 140640523 | +    |
| 19351 | 1432882_at   | Region | 4932431P20Rik     | 114675 | 7    | 24939867  | 24952715  | +    |
| 19352 | 1424997_at   | Region | Sfrs8             | 231769 | 5    | 128676882 | 128691989 | +    |
| 19353 | 1418802_at   | Region | R74862            | 97423  | 7    | 137446608 | 137466115 | -    |
| 19354 | 1442129_at   | Region | 1810058I24Rik     | 67705  | 6    | 35357033  | 35357540  | +    |
| 19355 | 1445789_at   | Region | None              | None   | NONE | NONE      | NONE      | NONE |
| 19356 | 1444642_at   | Region | None              | None   | 1    | 44041266  | 44042120  | -    |
| 19357 | 1423981_x_at | Region | Slc25a29          | 214663 | 12   | 104296871 | 104306869 | -    |
| 19358 | 1431138_at   | Region | 4930438O05Rik     | 78795  | 1    | 85961103  | 86084595  | +    |
| 19359 | 1419293_at   | Region | Dscam             | 13508  | 16   | 96075147  | 96653164  | -    |
| 19360 | 1433170_at   | Region | 2900034C19Rik     | 72854  | 4    | 102670564 | 102671805 | -    |
| 19361 | 1445414_at   | Region | None              | None   | 8    | 17786777  | 17787407  | +    |
| 19362 | 1439281_at   | Region | None              | None   | 17   | 26439269  | 26439979  | -    |
| 19363 | 1418305_s_at | Region | Nola1             | 68147  | 3    | 128757791 | 128764027 | -    |
| 19364 | 1441128_at   | Region | 2310040A13Rik     | 69641  | 12   | 106273432 | 106274298 | +    |
|       |              |        | 1300018I05Rik /// |        |      |           |           |      |
| 19365 | 1423681_at   | Region | LOC445272         | 445272 | 17   | 27470394  | 27513279  | +    |
| 19366 | 1430561_at   | Region | Dnajb14           | 70604  | 3    | 136756714 | 136798772 | +    |
| 19367 | 1432322_at   | Region | 2310016E02Rik     | 67695  | 5    | 29365462  | 29366669  | -    |
| 19368 | 1431061_s_at | Region | Peli1             | 67245  | 11   | 21030262  | 21045116  | +    |
| 19369 | 1443108_at   | Region | 6530409C15Rik     | 76224  | 6    | 28262247  | 28265897  | +    |
| 19370 | 1459283_at   | Region | 6430510B20Rik     | 320025 | 5    | 113869150 | 113869825 | -    |
| 19371 | 1455053_a_at | Region | Tes3              | 114893 | 3    | 35346474  | 35374678  | -    |
| 19372 | 1439340_at   | Region | D630036G22Rik     | 442807 | 1    | 34507293  | 34507933  | +    |
| 19373 | 1453665_at   | Region | 4930529M08Rik     | 78774  | 2    | 145391741 | 145423157 | +    |
| 19374 | 1444939_at   | Region | None              | None   | 19   | 10102765  | 10103686  | +    |
| 19375 | 1455567_at   | Region | Crk7              | 69131  | 11   | 98024401  | 98067791  | +    |
| 19376 | 1456489_at   | Region | 2500001H09Rik     | 74737  | 7    | 86684260  | 86709889  | -    |
| 19377 | 1460273_a_at | Region | Birc1b            | 17948  | 13   | 96337711  | 96397838  | -    |
| 19378 | 1441579_at   | Region | Dmrta1            | 242523 | 4    | 88663270  | 88669838  | +    |

|       |              |        |                    |        |      |           |           |      |
|-------|--------------|--------|--------------------|--------|------|-----------|-----------|------|
| 19379 | 1419394_s_at | Region | S100a8             | 20201  | 3    | 90477555  | 90478504  | +    |
| 19380 | 1430181_at   | Region | 1700026P10Rik      | 70069  | 15   | 98310954  | 98312251  | -    |
| 19381 | 1438873_at   | Region | None               | None   | 13   | 20984377  | 20984994  | -    |
| 19382 | 1438106_at   | Region | Pcdhb22            | 93893  | 18   | 37742075  | 37745141  | +    |
| 19383 | 1443069_at   | Region | None               | None   | 11   | 108000689 | 108001382 | -    |
| 19384 | 1436133_at   | Region | A430066A18         | 328290 | 13   | 70426535  | 70427235  | +    |
| 19385 | 1452329_at   | Region | Plekhn1            | 231002 | NONE | NONE      | NONE      | NONE |
| 19386 | 1421431_at   | Region | Ptrf               | 19285  | 11   | 100779597 | 100791659 | -    |
| 19387 | 1452693_at   | Region | Dhx35              | 71715  | 2    | 158251789 | 158315183 | +    |
| 19388 | 1451203_at   | Region | Mb                 | 17189  | 15   | 77067442  | 77102623  | -    |
| 19389 | 1451350_a_at | Region | Leprot             | 230514 | 4    | 100606688 | 100618263 | +    |
| 19390 | 1455459_at   | Region | Prdm15             | 114604 | 16   | 97276177  | 97324273  | -    |
| 19391 | 1449391_at   | Region | Zfp37              | 22696  | 4    | 61280734  | 61299618  | -    |
| 19392 | 1442882_at   | Region | None               | None   | X    | 70059708  | 70060536  | -    |
| 19393 | 1419755_at   | Region | Mfi2 /// LOC547262 | 30060  | 16   | 30688181  | 30708391  | +    |
| 19394 | 1445795_at   | Region | AU022848           | 107294 | NONE | NONE      | NONE      | NONE |
| 19395 | 1442251_at   | Region | Vcpip1             | 70675  | 1    | 9829046   | 9852904   | -    |
| 19396 | 1431087_at   | Region | Spbc24             | 67629  | 9    | 21648325  | 21653187  | -    |
| 19397 | 1423312_at   | Region | Tpbg               | 21983  | 9    | 86173432  | 86176811  | +    |
| 19398 | 1440888_at   | Region | None               | None   | 6    | 113036652 | 113037795 | -    |
| 19399 | 1453603_at   | Region | 2700022O18Rik      | 72591  | 14   | 51189231  | 51190263  | -    |
| 19400 | 1456796_at   | Region | Snai3              | 30927  | 8    | 121835793 | 121842279 | -    |
| 19401 | 1442813_at   | Region | C130010K08Rik      | 320127 | 6    | 36981421  | 37434251  | -    |
| 19402 | 1450032_at   | Region | Slco2a1            | 24059  | 9    | 102980160 | 103058431 | +    |
| 19403 | 1445097_at   | Region | None               | None   | 4    | 115246360 | 115247142 | +    |
| 19404 | 1435888_at   | Region | Egfr               | 13649  | 11   | 16646996  | 16808700  | +    |
| 19405 | 1416454_s_at | Region | Acta2              | 11475  | 19   | 33572198  | 33586443  | -    |
| 19406 | 1435597_at   | Region | ---                | 237877 | 11   | 79860788  | 79861438  | +    |
| 19407 | 1436623_at   | Region | Entpd7             | 93685  | 19   | 43234237  | 43276021  | +    |
| 19408 | 1436417_at   | Region | None               | None   | 1    | 83341743  | 83342445  | -    |
| 19409 | 1422571_at   | Region | Thbs2              | 21826  | 17   | 12721384  | 12748324  | -    |
| 19410 | 1441386_at   | Region | Rapgef1            | 107746 | 2    | 29551925  | 29670492  | +    |
| 19411 | 1453560_at   | Region | Fem1a              | 14154  | 17   | 53893863  | 53898116  | +    |
| 19412 | 1460034_at   | Region | BC042901           | 233033 | 7    | 23806290  | 23841166  | -    |
| 19413 | 1442470_at   | Region | None               | None   | NONE | NONE      | NONE      | NONE |
| 19414 | 1441099_at   | Region | None               | None   | 12   | 73403758  | 73404726  | -    |
| 19415 | 1426625_at   | Region | Zfp623             | 78834  | 15   | 75991021  | 75999469  | +    |
| 19416 | 1449126_at   | Region | Zfp90              | 22751  | 8    | 105711228 | 105721681 | +    |
| 19417 | 1429541_at   | Region | 2500002G23Rik      | 72306  | 6    | 163176    | 187592    | +    |
| 19418 | 1450077_at   | Region | Chd1               | 12648  | 17   | 13708827  | 13773901  | +    |
| 19419 | 1449409_at   | Region | Sult1c2            | 69083  | 17   | 51371775  | 51387696  | -    |
| 19420 | 1435964_a_at | Region | None               | None   | NONE | NONE      | NONE      | NONE |
| 19421 | 1431345_a_at | Region | Taf1b              | 21340  | 12   | 21048387  | 21108119  | +    |
| 19422 | 1452119_at   | Region | 2600005C20Rik      | 72462  | 17   | 29844491  | 29868935  | +    |
| 19423 | 1447933_at   | Region | Kif26a             | 238403 | 12   | 107630689 | 107661092 | +    |
| 19424 | 1438135_at   | Region | E130114P18Rik      | 319865 | 4    | 96543212  | 96753121  | -    |
| 19425 | 1452008_at   | Region | 9130422G05Rik      | 66819  | 4    | 82208143  | 82211319  | -    |
| 19426 | 1436945_x_at | Region | Stim1              | 20866  | 7    | 96373782  | 96541218  | +    |
| 19427 | 1450678_at   | Region | Itgb2              | 16414  | 10   | 77653405  | 77676819  | +    |
| 19428 | 1434006_at   | Region | BC051227           | 234384 | 8    | 69913907  | 69916179  | -    |
| 19429 | 1450006_at   | Region | Ncoa4              | 27057  | 14   | 30303888  | 30312393  | +    |
| 19430 | 1424984_at   | Region | 2700078E11Rik      | 78832  | 19   | 60127914  | 60181028  | -    |
| 19431 | 1437027_x_at | Region | Rnps1              | 19826  | 17   | 22218678  | 22229480  | +    |
| 19432 | 1416492_at   | Region | Ccne1              | 12447  | 7    | 33263859  | 33273205  | -    |
| 19433 | 1416892_s_at | Region | 3110001A13Rik      | 66540  | 2    | 3630729   | 3699405   | +    |
| 19434 | 1436384_at   | Region | Rps10              | 67097  | 17   | 25426347  | 25431160  | -    |
| 19435 | 1427997_at   | Region | 1110007M04Rik      | 68493  | 4    | 25033642  | 25037728  | +    |
| 19436 | 1440107_at   | Region | None               | None   | 1    | 152764334 | 152764954 | -    |
| 19437 | 1456360_at   | Region | 1700022C02Rik      | 66336  | 13   | 49063572  | 49249594  | -    |
| 19438 | 1435099_at   | Region | Utp14a             | 72554  | X    | 42777730  | 42803245  | +    |
| 19439 | 1443923_at   | Region | Akap13             | 233400 | 7    | 69488734  | 69518761  | +    |
| 19440 | 1422735_at   | Region | Foxq1              | 15220  | 13   | 31038059  | 31040092  | +    |
| 19441 | 1443477_at   | Region | Psmd2              | 21762  | 16   | 19423847  | 19435555  | +    |
| 19442 | 1421065_at   | Region | Jak2               | 16452  | 19   | 28505054  | 28564581  | +    |

|       |              |        |                   |        |      |           |           |      |
|-------|--------------|--------|-------------------|--------|------|-----------|-----------|------|
| 19443 | 1451212_at   | Region | Ccdc21            | 70012  | 4    | 133090758 | 133147949 | -    |
| 19444 | 1428597_at   | Region | 2700008N14Rik     | 76795  | 11   | 49884214  | 49925626  | +    |
| 19445 | 1433147_at   | Region | Cald1             | 109624 | 6    | 34803747  | 34868362  | +    |
| 19446 | 1424777_at   | Region | Wdr21             | 73828  | 12   | 80390109  | 80405943  | +    |
| 19447 | 1429109_at   | Region | Rnf184            | 77853  | 9    | 101048875 | 101053251 | +    |
| 19448 | 1443238_at   | Region | None              | None   | NONE | NONE      | NONE      | NONE |
| 19449 | 1433525_at   | Region | Ednra             | 13617  | 8    | 76876810  | 76938556  | -    |
| 19450 | 1438956_x_at | Region | Pim3              | 223775 | 15   | 88914123  | 88917655  | +    |
| 19451 | 1444992_at   | Region | Al120166          | 103141 | 10   | 82927798  | 82928617  | +    |
| 19452 | 1457348_at   | Region | None              | None   | NONE | NONE      | NONE      | NONE |
| 19453 | 1422290_at   | Region | Htr1d             | 15552  | 4    | 135304781 | 135325655 | +    |
| 19454 | 1442108_at   | Region | Rnf25             | 57751  | 1    | 74896219  | 74903844  | -    |
| 19455 | 1434609_at   | Region | B930007L02Rik     | 321006 | 9    | 106945364 | 106946769 | +    |
| 19456 | 1449920_at   | Region | Cyp19a1           | 13075  | 9    | 54269958  | 54297857  | -    |
| 19457 | 1445173_at   | Region | AK129341          | 234915 | 9    | 8082425   | 8140437   | -    |
| 19458 | 1445721_at   | Region | A830021M18        | 223483 | 15   | 36724999  | 36730441  | +    |
| 19459 | 1459118_at   | Region | D230038C21        | 328872 | 17   | 83898126  | 83899103  | -    |
| 19460 | 1441660_at   | Region | None              | None   | NONE | NONE      | NONE      | NONE |
| 19461 | 1421071_at   | Region | Vh1h              | 22346  | 6    | 114191852 | 114199465 | +    |
| 19462 | 1453033_at   | Region | 2010003O02Rik     | 66434  | 4    | 40408436  | 40409792  | +    |
| 19463 | 1442679_at   | Region | Map2k4            | 26398  | 11   | 65413894  | 65513947  | -    |
| 19464 | 1432858_at   | Region | D730048M19Rik     | 77991  | 6    | 120828832 | 120829806 | -    |
| 19465 | 1447567_at   | Region | Odz3              | 23965  | 8    | 47191599  | 47638956  | -    |
| 19466 | 1430651_s_at | Region | Zfp191            | 59057  | 18   | 24240763  | 24249267  | -    |
| 19467 | 1417000_at   | Region | Abtb1             | 80283  | 6    | 89270972  | 89277509  | -    |
| 19468 | 1442588_at   | Region | 9530060I07        | 329217 | 1    | 96655825  | 96656270  | +    |
| 19469 | 1439166_at   | Region | 1500002M01Rik     | 68979  | 11   | 106987749 | 107010349 | -    |
| 19470 | 1441039_at   | Region | 4930532J02Rik     | 75195  | 3    | 94441141  | 94441819  | -    |
| 19471 | 1446757_at   | Region | Sugt1             | 67955  | 14   | 73941738  | 73983802  | +    |
| 19472 | 1451995_at   | Region | Taf11             | 68776  | 17   | 25697046  | 25703642  | -    |
| 19473 | 1453190_at   | Region | Usp19             | 71472  | 9    | 108541037 | 108550266 | +    |
|       |              |        | B230333C21Rik /// |        |      |           |           |      |
| 19474 | 1457686_at   | Region | LOC547167         | 338351 | X    | 31228738  | 31232885  | -    |
| 19475 | 1419985_s_at | Region | D11Ert461e        | 52570  | 11   | 54803571  | 54830972  | -    |
| 19476 | 1433380_at   | Region | 4921509A06Rik     | 70883  | 9    | 78829212  | 78830238  | +    |
| 19477 | 1425146_at   | Region | 2410075B13Rik     | 223648 | 15   | 76030756  | 76031978  | -    |
| 19478 | 1449561_at   | Region | 4921504I05Rik     | 66707  | 13   | 20947163  | 20948551  | -    |
| 19479 | 1435329_at   | Region | Fbxl11            | 225876 | 19   | 4106596   | 4187056   | -    |
| 19480 | 1447540_at   | Region | Tigd3             | 332359 | 19   | 5679928   | 5682897   | -    |
| 19481 | 1456367_at   | Region | Fut8              | 53618  | 12   | 74095608  | 74332578  | +    |
| 19482 | 1427541_x_at | Region | Hmmr              | 15366  | 11   | 40440695  | 40472363  | -    |
| 19483 | 1459138_at   | Region | None              | None   | 4    | 133777531 | 133778024 | -    |
| 19484 | 1423257_at   | Region | Cyp4a14           | 13119  | 4    | 114445050 | 114455042 | -    |
| 19485 | 1425815_a_at | Region | Hmmr              | 15366  | 11   | 40440695  | 40472363  | -    |
|       |              |        | Tomm20 ///        |        |      |           |           |      |
| 19486 | 1423079_a_at | Region | LOC546321         | 546321 | X    | 69368395  | 69375252  | -    |
| 19487 | 1436256_at   | Region | Grpel2            | 17714  | 18   | 61939158  | 61955132  | -    |
| 19488 | 1453698_at   | Region | 6030451C04Rik     | 77115  | 4    | 104159180 | 104160819 | +    |
| 19489 | 1458801_at   | Region | AU022320          | 99812  | 3    | 88683581  | 88684110  | -    |
| 19490 | 1441119_at   | Region | Garnl1            | 56784  | 12   | 52323288  | 52540884  | -    |
| 19491 | 1417678_at   | Region | Mmp24             | 17391  | 2    | 155232322 | 155273266 | +    |
| 19492 | 1455451_at   | Region | Al449310          | 101584 | 7    | 91504850  | 91505827  | +    |
| 19493 | 1427682_a_at | Region | Egr2              | 13654  | 10   | 67591672  | 67595982  | +    |
| 19494 | 1417137_at   | Region | Uck2              | 80914  | 1    | 167159294 | 167218315 | -    |
| 19495 | 1441796_at   | Region | 2010309E21Rik     | 66488  | 6    | 4013569   | 4015176   | +    |
| 19496 | 1440363_at   | Region | None              | None   | 9    | 14836388  | 14837430  | -    |
| 19497 | 1435271_at   | Region | Irf3              | 54131  | 7    | 39074202  | 39079390  | +    |
| 19498 | 1434817_s_at | Region | 4930535B03Rik     | 75137  | 3    | 95249480  | 95306695  | -    |
| 19499 | 1449752_at   | Region | 4930422J18Rik     | 74646  | 4    | 148388645 | 148447368 | -    |
| 19500 | 1448495_at   | Region | Tsta3             | 22122  | 15   | 75974752  | 75979799  | -    |
| 19501 | 1447219_at   | Region | None              | None   | 7    | 23436666  | 23437058  | -    |
| 19502 | 1455067_at   | Region | Psd4              | 215632 | 2    | 24317559  | 24340891  | +    |
| 19503 | 1443160_at   | Region | Mttr13            | 319934 | 7    | 104160882 | 104472741 | -    |
| 19504 | 1447778_x_at | Region | MGI:2389572       | 210766 | X    | 70077355  | 70114652  | +    |
| 19505 | 1440063_at   | Region | Farsla            | 66590  | 8    | 84124139  | 84134142  | +    |

|       |              |        |               |        |      |           |           |      |
|-------|--------------|--------|---------------|--------|------|-----------|-----------|------|
| 19506 | 1455185_s_at | Region | None          | None   | X    | 18756973  | 18758878  | +    |
| 19507 | 1421825_at   | Region | Bace1         | 23821  | 9    | 45851835  | 45875693  | +    |
| 19508 | 1459927_at   | Region | 4833445I07Rik | 102731 | 9    | 108616531 | 108618263 | +    |
| 19509 | 1449725_at   | Region | Gfpt1         | 14583  | 6    | 87476967  | 87522715  | +    |
| 19510 | 1422134_at   | Region | Fosb          | 14282  | 7    | 16172156  | 16178997  | -    |
| 19511 | 1428727_at   | Region | 4631422C13Rik | 70799  | 18   | 68028805  | 68115956  | +    |
| 19512 | 1419566_at   | Region | Fank1         | 66930  | 7    | 128144543 | 128249184 | +    |
| 19513 | 1439465_x_at | Region | 9430057O19Rik | 231093 | 5    | 29347796  | 29355631  | +    |
| 19514 | 1430137_at   | Region | Map3k13       | 71751  | 16   | 20663480  | 20702856  | +    |
| 19515 | 1458045_at   | Region | Odz4          | 23966  | 7    | 90212889  | 90948341  | +    |
| 19516 | 1426928_at   | Region | 4633402D15Rik | 70829  | 1    | 121194302 | 121212958 | +    |
| 19517 | 1456332_at   | Region | Tmem17        | 103765 | 11   | 22407076  | 22414024  | +    |
| 19518 | 1431265_at   | Region | Zfp28         | 22690  | 7    | 5579089   | 5591525   | +    |
| 19519 | 1445665_at   | Region | 38601         | 56526  | X    | 31532799  | 31610011  | -    |
| 19520 | 1447109_at   | Region | None          | None   | 8    | 3647034   | 3647305   | -    |
| 19521 | 1431099_at   | Region | Hoxd8         | 15437  | 2    | 74403297  | 74405003  | +    |
| 19522 | 1451138_x_at | Region | 2700087H15Rik | 70427  | 10   | 79660963  | 79675809  | -    |
| 19523 | 1445460_at   | Region | None          | None   | 4    | 32862076  | 32862614  | -    |
| 19524 | 1432221_at   | Region | 5330417H12Rik | 76679  | 7    | 101573971 | 101575148 | -    |
| 19525 | 1421151_a_at | Region | Epha2         | 13836  | 4    | 140182501 | 140210639 | +    |
| 19526 | 1451056_at   | Region | Psmd7         | 17463  | 8    | 106878074 | 106886175 | -    |
| 19527 | 1425154_a_at | Region | Csf1          | 12977  | 3    | 107536887 | 107556052 | -    |
| 19528 | 1429375_at   | Region | Anapc10       | 68999  | 8    | 78925931  | 78991431  | +    |
| 19529 | 1441540_at   | Region | 9030406N13Rik | 211329 | 10   | 30689068  | 30845679  | -    |
| 19530 | 1445198_at   | Region | Utx           | 22289  | X    | 16401607  | 16518298  | +    |
| 19531 | 1439210_at   | Region | Mrps9         | 69527  | 1    | 43145999  | 43200398  | +    |
| 19532 | 1443458_at   | Region | D630033O11Rik | 235302 | 9    | 43219236  | 43239030  | +    |
| 19533 | 1434212_at   | Region | Ndufs8        | 225887 | 19   | 3697661   | 3701550   | -    |
| 19534 | 1445640_at   | Region | Hlcs          | 110948 | 16   | 93524578  | 93682724  | -    |
| 19535 | 1457914_at   | Region | None          | None   | 17   | 71992621  | 71993287  | -    |
| 19536 | 1450493_at   | Region | Gpr54         | 114229 | 10   | 80039605  | 80044817  | +    |
| 19537 | 1422297_at   | Region | Pfdn5         | 56612  | 15   | 102386650 | 102391967 | +    |
| 19538 | 1445151_at   | Region | Mtf2          | 17765  | 5    | 107157468 | 107177436 | +    |
| 19539 | 1435024_at   | Region | 4931428F04Rik | 74356  | 8    | 104576037 | 104584678 | -    |
| 19540 | 1446798_at   | Region | Map4k3        | 225028 | 17   | 78411242  | 78558951  | -    |
| 19541 | 1444373_at   | Region | Tiam1         | 21844  | 16   | 88944544  | 89118259  | -    |
| 19542 | 1439528_at   | Region | 4833423E24Rik | 228151 | 2    | 85181343  | 85216773  | -    |
| 19543 | 1417818_at   | Region | Wwtr1         | 97064  | 3    | 57091063  | 57208422  | -    |
| 19544 | 1445193_x_at | Region | D8Ertd575e    | 52367  | 8    | 93315963  | 93316467  | -    |
| 19545 | 1452343_at   | Region | D18Ertd653e   | 52662  | 18   | 68295003  | 68486335  | +    |
| 19546 | 1456566_x_at | Region | Rbm14         | 56275  | 19   | 4589715   | 4600375   | -    |
| 19547 | 1451405_at   | Region | Pcca          | 110821 | 14   | 117100264 | 117454874 | +    |
| 19548 | 1432770_at   | Region | 0610040A22Rik | 68376  | 13   | 70182951  | 70184122  | -    |
| 19549 | 1422295_at   | Region | Mds1          | 17251  | 3    | 29648096  | 29649848  | -    |
| 19550 | 1452668_x_at | Region | Rab2b         | 76338  | 14   | 47361876  | 47379434  | -    |
| 19551 | 1437075_at   | Region | Frmd3         | 242506 | 4    | 73074880  | 73251147  | +    |
| 19552 | 1452429_s_at | Region | Abcf1         | 224742 | 17   | 33675840  | 33688771  | -    |
| 19553 | 1442263_at   | Region | Rgs13         | 246709 | 1    | 143970730 | 144009435 | -    |
| 19554 | 1453552_at   | Region | 2310014F07Rik | 69631  | 9    | 50561726  | 50577132  | -    |
| 19555 | 1429504_at   | Region | Rnpc3         | 67225  | 3    | 14547     | 39217     | +    |
| 19556 | 1449706_s_at | Region | Nr5a2         | 26424  | 1    | 136693054 | 136812271 | -    |
| 19557 | 1417979_at   | Region | Tnmd          | 64103  | X    | 127395947 | 127410516 | +    |
| 19558 | 1434713_at   | Region | AI452372      | 239555 | 15   | 80286820  | 80305424  | +    |
| 19559 | 1422336_at   | Region | Hoxa13        | 15398  | 6    | 52403288  | 52404624  | -    |
| 19560 | 1458069_at   | Region | Tbc1d5        | 72238  | 17   | 48265628  | 48712039  | -    |
| 19561 | 1442048_at   | Region | Rnf11         | 29864  | 4    | 108411762 | 108435410 | -    |
| 19562 | 1444582_at   | Region | 4833420K19Rik | 76863  | 9    | 7176782   | 7200101   | +    |
| 19563 | 1445105_at   | Region | Pcaf          | 18519  | 17   | 51101486  | 51203822  | +    |
| 19564 | 1447201_at   | Region | None          | None   | 7    | 29712564  | 29713054  | +    |
| 19565 | 1422813_at   | Region | Cacng1        | 12299  | 11   | 107524753 | 107537611 | -    |
| 19566 | 1459468_at   | Region | C79743        | 97075  | NONE | NONE      | NONE      | NONE |
| 19567 | 1420104_at   | Region | Sertad2       | 58172  | 11   | 20438127  | 20543916  | +    |
| 19568 | 1428992_at   | Region | Unc13d        | 70450  | 11   | 115883182 | 115889569 | -    |
| 19569 | 1458121_at   | Region | A430107O13Rik | 214642 | 6    | 22056746  | 22284808  | +    |
| 19570 | 1447996_at   | Region | AI848149      | 102944 | X    | 149196622 | 149197101 | +    |

|       |              |        |                   |        |    |           |           |   |
|-------|--------------|--------|-------------------|--------|----|-----------|-----------|---|
| 19571 | 1449646_s_at | Region | Tigd5             | 105734 | 15 | 75959829  | 75964603  | + |
| 19572 | 1430188_at   | Region | 1700037C18Rik     | 73261  | 16 | 3577365   | 3580224   | - |
| 19573 | 1441431_at   | Region | 1700041C02Rik     | 73332  | 4  | 118281798 | 118374408 | - |
| 19574 | 1431904_at   | Region | 4933427G17Rik     | 74466  | 7  | 114858076 | 114890354 | + |
| 19575 | 1428744_s_at | Region | Bri3bp            | 76809  | 5  | 124608455 | 124621964 | + |
| 19576 | 1455281_at   | Region | Wdr33             | 74320  | 18 | 32067429  | 32147139  | + |
| 19577 | 1449125_at   | Region | Tnfaip8l1         | 66443  | 17 | 53799615  | 53810994  | + |
| 19578 | 1441708_at   | Region | Spag16            | 66722  | 1  | 70121849  | 70562157  | + |
| 19579 | 1428230_at   | Region | Prkcnc            | 75292  | 17 | 76772784  | 76835125  | - |
| 19580 | 1443437_at   | Region | None              | None   | 3  | 82566899  | 82567494  | - |
| 19581 | 1446217_at   | Region | LOC433202         | 433202 | 18 | 74294711  | 74302741  | + |
| 19582 | 1446482_at   | Region | D9Mgc48e          | 28135  | 9  | 102536385 | 102575474 | - |
| 19583 | 1432731_at   | Region | 5830437K03Rik     | 76068  | 3  | 129832319 | 129833698 | + |
| 19584 | 1440162_x_at | Region | A630043P06        | 328187 | 13 | 12510581  | 12512925  | - |
| 19585 | 1428276_at   | Region | 1110065L07Rik     | 68904  | 8  | 9345221   | 9357725   | + |
| 19586 | 1445374_at   | Region | Vti1a             | 53611  | 19 | 54896591  | 55207543  | + |
| 19587 | 1446234_at   | Region | Utx               | 22289  | X  | 16401607  | 16518298  | + |
| 19588 | 1435545_at   | Region | BC032203          | 210982 | 17 | 44309813  | 44343803  | - |
| 19589 | 1442731_at   | Region | B230308N11Rik     | 320060 | 5  | 64425311  | 64425695  | - |
| 19590 | 1415722_a_at | Region | 1110059P08Rik     | 66201  | 10 | 14555698  | 14606206  | - |
| 19591 | 1433530_at   | Region | 2210411K19Rik     | 70164  | 10 | 128285204 | 128286227 | - |
| 19592 | 1429939_at   | Region | D19Ertcd703e      | 52036  | 19 | 3243622   | 3364414   | - |
| 19593 | 1445669_at   | Region | Spry4             | 24066  | 18 | 38809987  | 38824990  | - |
| 19594 | 1421153_at   | Region | Loxl4             | 67573  | 19 | 42138388  | 42157154  | - |
| 19595 | 1425771_at   | Region | Akr1d1            | 208665 | 6  | 37665377  | 37703622  | + |
| 19596 | 1429877_at   | Region | Lrrc44            | 74435  | 3  | 154100544 | 154201154 | + |
|       |              |        | 2310061F22Rik /// |        |    |           |           |   |
| 19597 | 1428350_at   | Region | LOC547026         | 234839 | 8  | 121857730 | 121863335 | + |
| 19598 | 1458017_at   | Region | 6820402O20Rik     | 228829 | 2  | 155653612 | 155764373 | + |
| 19599 | 1430855_at   | Region | Col20a1           | 73368  | 2  | 180703493 | 180734498 | + |
| 19600 | 1454110_at   | Region | 4930408K08Rik     | 76865  | 3  | 108874446 | 108876157 | - |
| 19601 | 1427729_at   | Region | Ehd2              | 259300 | 7  | 86        | 1894      | + |
| 19602 | 1421986_at   | Region | Eif4e2            | 26987  | 1  | 87030076  | 87054566  | + |
| 19603 | 1424181_at   | Region | 38601             | 56526  | X  | 31532799  | 31610011  | - |
| 19604 | 1455770_at   | Region | Tdo2              | 56720  | 3  | 81687472  | 81704788  | - |
| 19605 | 1453690_at   | Region | Mpp7              | 75739  | 18 | 7422318   | 7651672   | - |
| 19606 | 1450348_at   | Region | Slc19a3           | 80721  | 1  | 83343035  | 83367686  | - |
| 19607 | 1430226_at   | Region | 2900036K24Rik     | 72891  | X  | 67894341  | 67903682  | - |
| 19608 | 1417603_at   | Region | Per2              | 18627  | 1  | 91239024  | 91282480  | - |
| 19609 | 1432431_s_at | Region | 1110033L15Rik     | 73752  | 2  | 139909313 | 139934227 | + |
| 19610 | 1437059_at   | Region | Sox21             | 223227 | 14 | 112788599 | 112791264 | - |
| 19611 | 1440009_at   | Region | Olfr78            | 170639 | 7  | 96847781  | 96866447  | - |
| 19612 | 1454727_at   | Region | AI173486          | 106877 | 18 | 61959074  | 62015474  | - |
| 19613 | 1431435_at   | Region | None              | None   | 10 | 7138703   | 7142174   | + |
| 19614 | 1445958_at   | Region | None              | None   | 3  | 105238596 | 105239271 | - |
| 19615 | 1429417_at   | Region | 4833446K15Rik     | 78923  | 18 | 59401367  | 59636538  | + |
| 19616 | 1419468_at   | Region | Clec14a           | 66864  | 12 | 54996197  | 55000365  | - |
| 19617 | 1446172_at   | Region | BC026657          | 208618 | 2  | 20552057  | 20852534  | + |
| 19618 | 1428743_at   | Region | Bri3bp            | 76809  | 5  | 124608455 | 124621964 | + |
| 19619 | 1435243_at   | Region | 2810407L07Rik     | 69228  | 6  | 48187302  | 48189160  | - |
| 19620 | 1446725_at   | Region | A130094D17Rik     | 319460 | 2  | 150497292 | 150497911 | + |
| 19621 | 1450400_at   | Region | Ncoa6ip           | 116940 | 4  | 3502044   | 3543770   | + |
| 19622 | 1438910_a_at | Region | Stom              | 13830  | 2  | 35246152  | 35269171  | - |
| 19623 | 1442186_at   | Region | Sca7              | 246103 | 14 | 12474639  | 12566208  | + |
| 19624 | 1450951_at   | Region | Cspg6             | 13006  | 19 | 53166173  | 53210193  | + |
| 19625 | 1457408_at   | Region | Pde4a             | 18577  | 9  | 21049525  | 21095183  | + |
| 19626 | 1434675_at   | Region | 1700065O13Rik     | 73451  | 17 | 30841770  | 30858356  | - |
| 19627 | 1445598_at   | Region | None              | None   | 8  | 56653428  | 56653779  | - |
| 19628 | 1419261_at   | Region | Acad8             | 66948  | 9  | 26868034  | 26893463  | - |
| 19629 | 1419235_s_at | Region | Helb              | 117599 | 10 | 119661305 | 119690587 | - |
| 19630 | 1429943_at   | Region | Ctbs              | 74245  | 3  | 145427044 | 145442322 | + |
| 19631 | 1442483_at   | Region | Fut8              | 53618  | 12 | 74095608  | 74332578  | + |
| 19632 | 1427691_a_at | Region | lfnar2            | 15976  | 16 | 90530631  | 90563104  | + |
| 19633 | 1417444_at   | Region | E2f5              | 13559  | 3  | 14575523  | 14603161  | + |
| 19634 | 1454378_at   | Region | Ywhaq             | 22630  | 12 | 18728420  | 18754333  | + |

|       |              |        |               |        |      |           |           |      |
|-------|--------------|--------|---------------|--------|------|-----------|-----------|------|
| 19635 | 1438845_at   | Region | lhpk1         | 27399  | 9    | 108070635 | 108116769 | +    |
| 19636 | 1426363_x_at | Region | H2afy3        | 404634 | 10   | 61704953  | 61750170  | -    |
| 19637 | 1423530_at   | Region | Stk32c        | 57740  | 7    | 133505216 | 133584149 | -    |
| 19638 | 1427725_a_at | Region | Pou2f2        | 18987  | 7    | 20270879  | 20309756  | -    |
| 19639 | 1452470_at   | Region | 4933409L06Rik | 74081  | 1    | 155740307 | 155868596 | -    |
| 19640 | 1460067_at   | Region | Ccr2          | 12772  | 9    | 124128581 | 124134948 | +    |
| 19641 | 1443334_at   | Region | D430042O09Rik | 233865 | 7    | 119802703 | 119911727 | +    |
| 19642 | 1442476_at   | Region | Cdv1          | 12589  | 5    | 121702852 | 121766929 | -    |
| 19643 | 1422513_at   | Region | Ccnf          | 12449  | 17   | 22026134  | 22054932  | -    |
| 19644 | 1456353_at   | Region | None          | None   | 11   | 87471614  | 87472255  | +    |
| 19645 | 1440403_at   | Region | Tmsb10        | 19240  | 6    | 20039912  | 20040386  | +    |
| 19646 | 1428825_at   | Region | Nr6a1         | 14536  | 2    | 38655532  | 38859850  | -    |
| 19647 | 1423782_at   | Region | Mobk1b        | 232157 | 6    | 83670277  | 83687043  | +    |
| 19648 | 1457755_at   | Region | Gng8          | 14709  | 7    | 13845956  | 13846375  | +    |
| 19649 | 1452025_a_at | Region | Zfp2          | 22678  | 11   | 50651553  | 50669006  | -    |
| 19650 | 1432807_at   | Region | 5830426K05Rik | 76053  | NONE | NONE      | NONE      | NONE |
| 19651 | 1423595_at   | Region | Mina          | 67014  | 16   | 58457856  | 58478079  | +    |
| 19652 | 1435315_s_at | Region | 2900034E22Rik | 72904  | 7    | 107423520 | 107424027 | +    |
| 19653 | 1419967_at   | Region | Seh1l         | 72124  | 18   | 68005761  | 68023379  | +    |
| 19654 | 1439125_at   | Region | Add1          | 11518  | 5    | 33061487  | 33119289  | +    |
| 19655 | 1450285_at   | Region | Ube1y1        | 22202  | Y    | 155155    | 180666    | +    |
| 19656 | 1439668_at   | Region | None          | None   | 11   | 112613874 | 112619995 | -    |
| 19657 | 1424448_at   | Region | Trim6         | 94088  | 7    | 98344459  | 98347510  | +    |
| 19658 | 1433177_at   | Region | 5830411G16Rik | 78937  | 6    | 56859230  | 56906236  | +    |
| 19659 | 1456276_at   | Region | None          | None   | 9    | 63516160  | 63516590  | -    |
| 19660 | 1430596_s_at | Region | 1700110N18Rik | 73569  | 16   | 64821348  | 64869062  | +    |
| 19661 | 1429610_a_at | Region | Zfp511        | 69752  | 7    | 134435402 | 134439603 | +    |
| 19662 | 1419368_a_at | Region | Rnf138        | 56515  | 18   | 21216269  | 21243151  | +    |
| 19663 | 1459734_at   | Region | Psmd14        | 59029  | 2    | 61567169  | 61655776  | +    |
| 19664 | 1447527_at   | Region | Irf2          | 16363  | 8    | 45686560  | 45794326  | +    |
| 19665 | 1442862_at   | Region | None          | None   | 12   | 96416382  | 96417245  | -    |
| 19666 | 1424962_at   | Region | Tm4sf4        | 229302 | 3    | 57058070  | 57074280  | +    |
| 19667 | 1443625_at   | Region | 4931433E08Rik | 70999  | 19   | 6941795   | 6955246   | -    |
| 19668 | 1418297_at   | Region | Dpysl4        | 26757  | 7    | 133487649 | 133503345 | +    |
| 19669 | 1453164_a_at | Region | Ptdss2        | 27388  | 7    | 135533273 | 135558141 | +    |
| 19670 | 1437055_x_at | Region | 1200003O06Rik | 66868  | 3    | 67255079  | 67276542  | +    |
| 19671 | 1441345_at   | Region | None          | None   |      | 24679117  | 24680249  | -    |
| 19672 | 1418064_at   | Region | Tfpt          | 69714  | 7    | 9788940   | 10280008  | -    |
| 19673 | 1422814_at   | Region | Calmbp1       | 12316  | 1    | 139301969 | 139341264 | +    |
| 19674 | 1446363_at   | Region | None          | None   | 10   | 97705646  | 97706194  | -    |
| 19675 | 1433103_at   | Region | 3010015K02Rik | 76832  | 9    | 35471945  | 35473316  | -    |
| 19676 | 1453110_at   | Region | Wdr51b        | 382406 | 10   | 99087833  | 99178075  | +    |
| 19677 | 1447862_x_at | Region | Thbs2         | 21826  | 17   | 12721384  | 12748324  | -    |
| 19678 | 1421050_at   | Region | D11Wsu68e     | 28084  | 11   | 101074830 | 101080633 | +    |
| 19679 | 1417906_at   | Region | 1700001F09Rik | 71826  | 14   | 40267851  | 40273273  | -    |
| 19680 | 1444971_at   | Region | Rbm5          | 83486  | 9    | 107808484 | 107838963 | -    |
| 19681 | 1444819_at   | Region | C86090        | 97662  | NONE | NONE      | NONE      | NONE |
| 19682 | 1442125_at   | Region | Ccm1          | 79264  | 5    | 3809194   | 3847364   | +    |
| 19683 | 1447892_at   | Region | None          | None   | 18   | 23435293  | 23435498  | +    |
| 19684 | 1450038_s_at | Region | Usp9x         | 22284  | X    | 11310477  | 11410726  | +    |
| 19685 | 1457474_at   | Region | None          | None   | 19   | 41933035  | 41933940  | -    |
| 19686 | 1449751_at   | Region | Slc6a6        | 21366  | 6    | 92133220  | 92208188  | +    |
| 19687 | 1442375_at   | Region | Ubap2         | 68926  | 4    | 41333166  | 41413986  | -    |
| 19688 | 1437699_at   | Region | E430014B02Rik | 320908 | 17   | 49280333  | 49281014  | -    |
| 19689 | 1449436_s_at | Region | Ubb           | 22187  | 11   | 62277156  | 62278863  | +    |
| 19690 | 1431704_a_at | Region | Ralgps2       | 78255  | 1    | 156713690 | 156845148 | -    |
| 19691 | 1430530_s_at | Region | 1110025F24Rik | 67824  | 16   | 4382757   | 4390413   | -    |
| 19692 | 1452749_at   | Region | Papd1         | 67440  | 18   | 4380336   | 4401528   | +    |
| 19693 | 1456893_at   | Region | None          | None   | NONE | NONE      | NONE      | NONE |
| 19694 | 1441019_at   | Region | Fbxo3         | 57443  | 2    | 103732553 | 103767991 | +    |
| 19695 | 1458037_at   | Region | Ncald         | 52589  | 15   | 37371112  | 37797344  | -    |
| 19696 | 1428863_at   | Region | Ankrd39       | 109346 | 1    | 36832764  | 36841792  | -    |
| 19697 | 1460339_at   | Region | Psma4         | 26441  | 9    | 55070048  | 55077219  | +    |
| 19698 | 1444512_at   | Region | Arhgap29      | 214137 | 3    | 120732219 | 120795050 | +    |
| 19699 | 1429319_at   | Region | Rhoh          | 74734  | 5    | 64661623  | 64698386  | +    |

|       |              |        |               |        |      |           |           |      |
|-------|--------------|--------|---------------|--------|------|-----------|-----------|------|
| 19700 | 1444595_at   | Region | None          | None   | NONE | NONE      | NONE      | NONE |
| 19701 | 1432155_at   | Region | Wasl          | 73178  | 6    | 24663290  | 24714456  | -    |
| 19702 | 1430304_at   | Region | Wdr76         | 241627 | 2    | 121020636 | 121058710 | +    |
| 19703 | 1428985_at   | Region | Phf22         | 71793  | 3    | 131982349 | 132001384 | +    |
| 19704 | 1453539_at   | Region | 4930562C03Rik | 67667  | 9    | 3239798   | 3247879   | +    |
| 19705 | 1458874_at   | Region | ---           | 382129 | 9    | 16052787  | 16053507  | -    |
| 19706 | 1450772_at   | Region | Wnt11         | 22411  | 7    | 92930295  | 92945198  | +    |
| 19707 | 1424451_at   | Region | MGC29978      | 235674 | 9    | 119142304 | 119151354 | -    |
| 19708 | 1453719_at   | Region | 4930506C21Rik | 75060  | 17   | 8864993   | 8870266   | -    |
| 19709 | 1441763_at   | Region | Zdhhc6        | 66980  | 19   | 54859814  | 54896233  | -    |
| 19710 | 1440237_at   | Region | Ercc4         | 50505  | 16   | 11850826  | 11883488  | +    |
| 19711 | 1437956_at   | Region | BB220380      | 104709 | 11   | 68228749  | 68278356  | +    |
| 19712 | 1420985_at   | Region | Ash1l         | 192195 | 3    | 88709675  | 88822741  | +    |
| 19713 | 1442395_at   | Region | Dst           | 13518  | 1    | 34280938  | 34577763  | +    |
| 19714 | 1415774_at   | Region | Statip1       | 58523  | 18   | 24832491  | 24867306  | +    |
| 19715 | 1417496_at   | Region | Cp            | 12870  | 3    | 19298453  | 19333864  | +    |
| 19716 | 1458422_at   | Region | D730002M21Rik | 269094 | 19   | 55617518  | 55622419  | +    |
| 19717 | 1427083_a_at | Region | Map4k5        | 399510 | 12   | 66635229  | 66724562  | -    |
| 19718 | 1432820_at   | Region | Psmd7         | 17463  | 8    | 106878074 | 106886175 | -    |
| 19719 | 1439521_at   | Region | None          | None   | NONE | NONE      | NONE      | NONE |
| 19720 | 1456102_a_at | Region | Cul5          | 75717  | 9    | 53680190  | 53730439  | -    |
| 19721 | 1417811_at   | Region | Slc24a6       | 170756 | 5    | 119662999 | 119685826 | +    |
| 19722 | 1450816_at   | Region | Polg2         | 50776  | 11   | 106589395 | 106600531 | -    |
| 19723 | 1451621_at   | Region | 5830417C01Rik | 78825  | 1    | 178140297 | 178205198 | +    |
| 19724 | 1424060_at   | Region | Neil3         | 234258 | 8    | 52551737  | 52603865  | -    |
| 19725 | 1457297_at   | Region | Mef2a         | 17258  | 7    | 61136273  | 61137731  | -    |
| 19726 | 1456294_at   | Region | 0610013E23Rik | 76892  | 11   | 86212649  | 86226999  | +    |
| 19727 | 1442833_at   | Region | D15ErtD30e    | 52238  | 15   | 27497770  | 27499035  | +    |
| 19728 | 1426749_at   | Region | Hrmt1I3       | 71974  | 7    | 43892468  | 43972375  | +    |
| 19729 | 1420175_at   | Region | Tax1bp1       | 52440  | 6    | 52858073  | 52910809  | +    |
| 19730 | 1417415_at   | Region | Slc6a3        | 13162  | 13   | 69595107  | 69637297  | +    |
| 19731 | 1447882_x_at | Region | Ddx54         | 71990  | 5    | 119764937 | 119780399 | +    |
| 19732 | 1453084_s_at | Region | 2310067L16Rik | 69700  | 15   | 71858269  | 71984039  | -    |
| 19733 | 1427529_at   | Region | Fzd9          | 14371  | 5    | 134262447 | 134264521 | -    |
| 19734 | 1453183_at   | Region | 1110034A24Rik | 109065 | 12   | 66020879  | 66028871  | -    |
| 19735 | 1449755_at   | Region | D7ErtD183e    | 52234  | 7    | 112068457 | 112068680 | -    |
| 19736 | 1458540_at   | Region | None          | None   | 5    | 76042866  | 76045459  | -    |
| 19737 | 1440423_at   | Region | Zbtb37        | 240869 | 1    | 160921704 | 160938390 | -    |
| 19738 | 1442317_at   | Region | G3bp          | 27041  | 11   | 55238464  | 55253728  | +    |
| 19739 | 1458191_at   | Region | Foxp2         | 114142 | 6    | 14888986  | 15429612  | +    |
| 19740 | 1437505_at   | Region | None          | None   | 15   | 27892215  | 27893417  | -    |
| 19741 | 1442386_at   | Region | C030010B13Rik | 77310  | 2    | 173046327 | 173120005 | -    |
| 19742 | 1442107_at   | Region | Flnb          | 286940 | 14   | 5564611   | 5619816   | +    |
| 19743 | 1450464_at   | Region | E4f1          | 13560  | 17   | 22247378  | 22255104  | -    |
| 19744 | 1432918_at   | Region | 4921511E18Rik | 70879  | X    | 148926900 | 148928840 | +    |
| 19745 | 1421147_at   | Region | Terf2         | 21750  | 8    | 106367591 | 106394116 | -    |
| 19746 | 1417456_at   | Region | Gnpat         | 14712  | 8    | 124150410 | 124177380 | +    |
| 19747 | 1447735_x_at | Region | MGI:1926224   | 268859 | 16   | 6740061   | 7081334   | +    |
| 19748 | 1424887_at   | Region | Klhdcc4       | 234825 | 8    | 121177917 | 121211156 | -    |
| 19749 | 1438797_at   | Region | 6330509M05Rik | 102913 | X    | 18337839  | 18339194  | +    |
| 19750 | 1434772_at   | Region | Adora2b       | 11541  | 11   | 61974626  | 61992094  | +    |
| 19751 | 1440144_x_at | Region | C330046E03    | 328468 | NONE | NONE      | NONE      | NONE |
| 19752 | 1435660_at   | Region | LOC545340     | 545340 | 1    | 85323446  | 85335993  | -    |
| 19753 | 1434486_x_at | Region | Ugp2          | 216558 | 11   | 21215937  | 21265268  | -    |
| 19754 | 1417270_at   | Region | Wdr12         | 57750  | 1    | 60380183  | 60401193  | -    |
| 19755 | 1432868_at   | Region | 2310047C04Rik | 224170 | 16   | 47767664  | 47835780  | -    |
| 19756 | 1430314_at   | Region | 4933437F05Rik | 71275  | 12   | 84100666  | 84118416  | -    |
| 19757 | 1439867_at   | Region | Ubox5         | 140629 | 2    | 130103855 | 130143839 | -    |
|       |              |        | Lenep ///     |        |      |           |           |      |
| 19758 | 1424422_s_at | Region | A930017E24Rik | 319945 | 3    | 89157732  | 89168601  | -    |
| 19759 | 1436505_at   | Region | Ppig          | 228005 | 2    | 69578493  | 69605782  | +    |
| 19760 | 1420249_s_at | Region | Ccl6          | 20305  | 11   | 83315881  | 83320979  | -    |
| 19761 | 1420217_x_at | Region | None          | None   | NONE | NONE      | NONE      | NONE |
| 19762 | 1454634_at   | Region | Fuk           | 234730 | 8    | 110180185 | 110200181 | -    |
| 19763 | 1418511_at   | Region | Dpt           | 56429  | 1    | 164716777 | 164744311 | +    |



|       |              |        |               |        |      |           |           |      |
|-------|--------------|--------|---------------|--------|------|-----------|-----------|------|
| 19764 | 1428175_at   | Region | 2810446P07Rik | 72745  | 13   | 80317260  | 80390898  | +    |
| 19765 | 1446834_at   | Region | Ctsc          | 13032  | 7    | 82254582  | 82287335  | +    |
| 19766 | 1449746_s_at | Region | Glpr1         | 73690  | 10   | 111688463 | 111700201 | -    |
| 19767 | 1443076_at   | Region | D030041N04Rik | 270035 | 8    | 24316834  | 24322553  | -    |
| 19768 | 1456585_x_at | Region | E130309D02Rik | 231868 | 5    | 142360090 | 142374242 | -    |
| 19769 | 1442452_at   | Region | Als2cr2       | 227154 | 1    | 59278531  | 59300058  | +    |
| 19770 | 1432765_at   | Region | C030007D22Rik | 77319  | 4    | 109394328 | 109394897 | +    |
| 19771 | 1448540_a_at | Region | 0610012G03Rik | 106264 | 16   | 30756422  | 30757865  | -    |
| 19772 | 1447888_x_at | Region | Msh2          | 17685  | 17   | 85528737  | 85580669  | +    |
| 19773 | 1442908_at   | Region | Tm9sf1        | 74140  | 14   | 50153981  | 50161821  | -    |
| 19774 | 1455224_at   | Region | Angptl1       | 72713  | 1    | 156744510 | 156751183 | +    |
| 19775 | 1443081_at   | Region | Gata6         | 14465  | 18   | 11097852  | 11130974  | +    |
| 19776 | 1447322_at   | Region | None          | None   | 18   | 32178791  | 32179243  | +    |
| 19777 | 1422410_at   | Region | Ferd3l        | 114712 | 12   | 30541084  | 30541969  | +    |
| 19778 | 1457669_x_at | Region | None          | None   | 5    | 1324536   | 1324662   | +    |
| 19779 | 1430515_s_at | Region | Aasdhppt      | 67618  | 9    | 4203626   | 4217037   | -    |
| 19780 | 1438033_at   | Region | Tef           | 21685  | 15   | 81853534  | 81877580  | +    |
| 19781 | 1442259_at   | Region | None          | None   | NONE | NONE      | NONE      | NONE |
| 19782 | 1430474_a_at | Region | Mtch2         | 56428  | 2    | 90551904  | 90571383  | +    |
| 19783 | 1430430_at   | Region | 6130401L20Rik | 75740  | 3    | 28484617  | 29093093  | +    |
| 19784 | 1458931_at   | Region | 6030427F01Rik | 97411  | 7    | 133271567 | 133272160 | +    |
| 19785 | 1455576_at   | Region | 5830482F20Rik | 320435 | 7    | 24195184  | 24204826  | +    |
| 19786 | 1458610_at   | Region | None          | None   | 2    | 25157727  | 25158335  | -    |
| 19787 | 1439672_at   | Region | Synj1         | 104015 | 16   | 90104242  | 90168538  | -    |
| 19788 | 1431016_at   | Region | Cwf19l1       | 72502  | 19   | 43654425  | 43680279  | -    |
| 19789 | 1430846_at   | Region | 1700061G19Rik | 78625  | 17   | 54565405  | 54578826  | +    |
| 19790 | 1424837_at   | Region | 2810428C21Rik | 69942  | X    | 31811897  | 31813021  | +    |
| 19791 | 1456928_at   | Region | None          | None   | 2    | 151571075 | 151571717 | +    |
| 19792 | 1457138_x_at | Region | None          | None   | NONE | NONE      | NONE      | NONE |
| 19793 | 1430994_at   | Region | LOC434321     | 434321 | 8    | 68387408  | 68388621  | -    |
| 19794 | 1446686_at   | Region | Dnajc11       | 230935 | 4    | 150426093 | 150469046 | +    |
| 19795 | 1431692_a_at | Region | Cblc          | 80794  | 7    | 16648964  | 16666053  | -    |
| 19796 | 1446298_at   | Region | C630016l17Rik | 320000 | 12   | 78379513  | 78380190  | -    |
| 19797 | 1451365_at   | Region | Rbm19         | 74111  | 5    | 119268320 | 119350778 | +    |
| 19798 | 1426651_at   | Region | Mrpl44        | 69163  | 1    | 80106651  | 80112515  | +    |
| 19799 | 1459378_at   | Region | Ppp3cb        | 19056  | 14   | 18861352  | 18907856  | -    |
| 19800 | 1442053_at   | Region | Phkb          | 102093 | 8    | 85113615  | 85333255  | +    |
| 19801 | 1459525_at   | Region | Cbara1        | 216001 | 10   | 59664687  | 59819557  | +    |
| 19802 | 1460521_a_at | Region | 5830411E10Rik | 109019 | 1    | 51769634  | 51779343  | -    |
| 19803 | 1453201_at   | Region | 4632411J06Rik | 78748  | 7    | 106807656 | 106811140 | +    |
| 19804 | 1421519_a_at | Region | Zfp120        | 104348 | 2    | 149573143 | 149593614 | -    |
| 19805 | 1448519_at   | Region | Tead2         | 21677  | 7    | 39292295  | 39310161  | +    |
| 19806 | 1453258_at   | Region | Cldn3         | 12739  | 5    | 133999706 | 134000964 | +    |
| 19807 | 1441105_at   | Region | None          | None   | 17   | 54782081  | 54793732  | -    |
| 19808 | 1439688_at   | Region | Fbln1         | 14114  | 15   | 85254610  | 85334255  | +    |
| 19809 | 1426220_at   | Region | 4930471M23Rik | 74919  | 5    | 29106904  | 29118671  | +    |
| 19810 | 1419281_a_at | Region | Zfp259        | 22687  | 9    | 46228559  | 46294858  | +    |
| 19811 | 1451218_at   | Region | Edem1         | 192193 | 6    | 109331841 | 109362540 | +    |
| 19812 | 1426718_at   | Region | Skiv2l2       | 72198  | 13   | 109262266 | 109322348 | -    |
| 19813 | 1420780_at   | Region | Ascl3         | 56787  | 7    | 103580336 | 103584603 | -    |
| 19814 | 1421144_at   | Strain | Rpgrip1       | 77945  | 14   | 47211021  | 47261035  | +    |
| 19815 | 1432198_at   | Strain | None          | None   | 19   | 16446831  | 16448032  | -    |
| 19816 | 1433438_x_at | Strain | Mela          | 17276  | 8    | 122800775 | 122803541 | -    |
| 19817 | 1455904_at   | Strain | Gas5          | 14455  | 1    | 160941991 | 160942669 | +    |
| 19818 | 1452544_x_at | Strain | H2-D1         | 14964  | 17   | 186801    | 249200    | -    |
| 19819 | 1449526_a_at | Strain | Gdpd3         | 68616  | 7    | 120816902 | 120825376 | +    |
| 19820 | 1434278_at   | Strain | Mtm1          | 17772  | X    | 65883573  | 65983756  | +    |
| 19821 | 1444198_at   | Strain | None          | None   | 10   | 92118279  | 92118907  | -    |
| 19822 | 1442632_at   | Strain | Centg2        | 347722 | 1    | 89273393  | 89708522  | +    |
| 19823 | 1433685_a_at | Strain | 6430706D22Rik | 381280 | 1    | 88082214  | 88096625  | -    |
| 19824 | 1436240_at   | Strain | G430041M01Rik | 101214 | 6    | 49378306  | 49398393  | -    |
| 19825 | 1438390_s_at | Strain | Pttg1         | 30939  | 11   | 43173101  | 43178818  | -    |
| 19826 | 1460670_at   | Strain | Riok3         | 66878  | 18   | 12316360  | 12344298  | +    |
| 19827 | 1418217_at   | Strain | Nme7          | 171567 | 1    | 164226222 | 164355246 | +    |
| 19828 | 1427651_x_at | Strain | H2-D1         | 14964  | 17   | 186801    | 249200    | -    |

|       |              |        |                   |        |      |           |           |      |
|-------|--------------|--------|-------------------|--------|------|-----------|-----------|------|
| 19829 | 1453145_at   | Strain | 4933439C20Rik     | 236604 | 11   | 3020573   | 3026734   | +    |
| 19830 | 1425614_x_at | Strain | H2-D1             | 14964  | 17   | 186801    | 249200    | -    |
|       |              |        | 1300007C21Rik /// |        |      |           |           |      |
|       |              |        | LOC433762 ///     |        |      |           |           |      |
| 19831 | 1431214_at   | Strain | LOC546083         | 433762 | 4    | 132057341 | 132062403 | +    |
| 19832 | 1456182_x_at | Strain | Mela              | 17276  | 8    | 122800775 | 122803541 | -    |
| 19833 | 1418350_at   | Strain | Hbegf             | 15200  | 18   | 36728734  | 36739576  | -    |
|       |              |        | 4933439C20Rik /// |        |      |           |           |      |
| 19834 | 1426387_x_at | Strain | Pisd              | 236604 | 11   | 3020573   | 3026734   | +    |
| 19835 | 1424105_a_at | Strain | Pttg1             | 30939  | 11   | 43173101  | 43178818  | -    |
| 19836 | 1436533_at   | Strain | Ssa2              | 20822  | 1    | 143587635 | 143609041 | -    |
| 19837 | 1441937_s_at | Strain | Pink1             | 68943  | 4    | 137194673 | 137207532 | -    |
| 19838 | 1447831_s_at | Strain | Mtmr7             | 54384  | 8    | 39494737  | 39579044  | -    |
| 19839 | 1453172_at   | Strain | Stch              | 110920 | 16   | 74838985  | 74850259  | -    |
| 19840 | 1447901_x_at | Strain | Sfi1 ///          | 545744 | 5    | 31212784  | 31224812  | +    |
| 19841 | 1419100_at   | Strain | Serpina3n         | 20716  | 12   | 99850891  | 99858461  | +    |
|       |              |        | 4933439C20Rik /// |        |      |           |           |      |
| 19842 | 1439070_x_at | Strain | Pisd              | 236604 | 11   | 3020573   | 3026734   | +    |
| 19843 | 1440305_at   | Strain | None              | None   | 17   | 33718187  | 33718773  | +    |
| 19844 | 1455892_x_at | Strain | None              | None   | NONE | NONE      | NONE      | NONE |
| 19845 | 1419635_at   | Strain | 4833420G17Rik     | 67392  | 13   | 16951468  | 16974828  | +    |
| 19846 | 1436850_at   | Strain | Creg2             | 263764 | 1    | 39917918  | 39948099  | -    |
| 19847 | 1439483_at   | Strain | AI506816          | 433855 | NONE | NONE      | NONE      | NONE |
| 19848 | 1458719_at   | Strain | Glp1r             | 14652  | 17   | 28714662  | 28749274  | +    |
| 19849 | 1427278_at   | Strain | Rsnl2             | 78785  | 17   | 69558453  | 69633262  | +    |
| 19850 | 1434975_x_at | Strain | 4933439C20Rik     | 236604 | 11   | 3020573   | 3026734   | +    |
| 19851 | 1416366_at   | Strain | Ndufc2            | 68197  | 7    | 91446361  | 91454068  | +    |
| 19852 | 1419327_at   | Strain | AA415817          | 94184  | 16   | 12571455  | 12638826  | -    |
| 19853 | 1453208_at   | Strain | 2700089E24Rik     | 381820 | 6    | 133875346 | 133882217 | +    |
| 19854 | 1441404_at   | Strain | Pafah1b1          | 18472  | 11   | 74399613  | 74450328  | -    |
| 19855 | 1454904_at   | Strain | Mtm1              | 17772  | X    | 65883573  | 65983756  | +    |
|       |              |        | Phgdh ///         |        |      |           |           |      |
| 19856 | 1454714_x_at | Strain | LOC546010         | 236539 | 3    | 97799380  | 97826178  | -    |
| 19857 | 1434340_at   | Strain | None              | None   | 11   | 4596762   | 4599122   | -    |
| 19858 | 1441797_at   | Strain | None              | None   | 17   | 33715526  | 33715796  | +    |
| 19859 | 1435579_at   | Strain | None              | None   | 4    | 42627267  | 42628153  | +    |
| 19860 | 1437478_s_at | Strain | Efhd2             | 27984  | 4    | 140739403 | 140756181 | -    |
| 19861 | 1417644_at   | Strain | Sspn              | 16651  | 6    | 146867107 | 146898185 | +    |
| 19862 | 1419188_s_at | Strain | Ccl27             | 20301  | 4    | 41908171  | 41908905  | -    |
|       |              |        | 4933409K07Rik /// |        |      |           |           |      |
|       |              |        | LOC545604 ///     |        |      |           |           |      |
|       |              |        | LOC545605 ///     |        |      |           |           |      |
|       |              |        | LOC545606 ///     |        |      |           |           |      |
|       |              |        | LOC545608 ///     |        |      |           |           |      |
|       |              |        | LOC545609 ///     |        |      |           |           |      |
|       |              |        | LOC545612 ///     |        |      |           |           |      |
| 19863 | 1447937_a_at | Strain | LOC545614         | 108816 | 4    | 42704619  | 42707003  | +    |
| 19864 | 1436070_at   | Strain | None              | None   | 17   | 28401483  | 28402217  | -    |
| 19865 | 1457973_at   | Strain | None              | None   | 14   | 88293748  | 88294170  | -    |
| 19866 | 1424109_a_at | Strain | Glo1              | 109801 | 17   | 28402993  | 28422646  | -    |
| 19867 | 1419637_s_at | Strain | 4833420G17Rik     | 67392  | 13   | 16951468  | 16974828  | +    |
| 19868 | 1435353_a_at | Strain | 4933439C20Rik     | 236604 | 11   | 3020573   | 3026734   | +    |
| 19869 | 1424108_at   | Strain | Glo1              | 109801 | 17   | 28402993  | 28422646  | -    |
| 19870 | 1444489_at   | Strain | Slc25a12          | 78830  | 2    | 70972038  | 71065297  | -    |
| 19871 | 1439241_x_at | Strain | Srd5a2l           | 57357  | 5    | 75385516  | 75400710  | +    |
| 19872 | 1452907_at   | Strain | Galc              | 14420  | 12   | 93629142  | 93686179  | -    |
| 19873 | 1459253_at   | Strain | Arrdc3            | 105171 | NONE | NONE      | NONE      | NONE |
| 19874 | 1415694_at   | Strain | Wars              | 22375  | 12   | 104331027 | 104364190 | -    |
| 19875 | 1447360_at   | Strain | Tgfb1i4           | 21807  | 14   | 70758316  | 70850256  | +    |
| 19876 | 1420940_x_at | Strain | Rgs5              | 19737  | 1    | 169589678 | 169627703 | +    |
| 19877 | 1445111_at   | Strain | Sec8l1            | 20336  | 6    | 33334773  | 34062752  | +    |
|       |              |        | 1300007C21Rik /// |        |      |           |           |      |
|       |              |        | LOC433762 ///     |        |      |           |           |      |
| 19878 | 1431213_a_at | Strain | LOC546083         | 433762 | 4    | 132057341 | 132062403 | +    |

|       |              |        |                   |        |      |           |           |      |
|-------|--------------|--------|-------------------|--------|------|-----------|-----------|------|
| 19879 | 1429951_at   | Strain | Ssbp2             | 66970  | 13   | 87661341  | 87840293  | +    |
| 19880 | 1419484_a_at | Strain | Gbas              | 14467  | 5    | 128900966 | 128934118 | +    |
| 19881 | 1436894_at   | Strain | D1Erd471e         | 27877  | 1    | 166232896 | 166234355 | +    |
| 19882 | 1437303_at   | Strain | Il6st             | 16195  | 13   | 108856634 | 108899366 | +    |
| 19883 | 1454686_at   | Strain | 6430706D22Rik     | 381280 | 1    | 88082214  | 88096625  | -    |
| 19884 | 1445307_at   | Strain | Auts2             | 319974 | 5    | 130627794 | 130728707 | -    |
| 19885 | 1434216_a_at | Strain | Nudt19            | 110959 | 7    | 30711030  | 30719686  | -    |
| 19886 | 1436462_at   | Strain | 3100002L24Rik     | 66376  | 2    | 175129264 | 175144107 | -    |
| 19887 | 1438663_at   | Strain | Bat2d             | 226562 | 1    | 162581319 | 162650087 | -    |
| 19888 | 1447096_at   | Strain | Pbx1              | 18514  | 1    | 168054563 | 168366387 | -    |
| 19889 | 1420354_at   | Strain | Cnm1              | 83674  | 19   | 42985617  | 43040169  | +    |
| 19890 | 1447808_s_at | Strain | Slc15a2           | 57738  | 16   | 35567606  | 35602387  | -    |
| 19891 | 1457323_at   | Strain | C030030A07Rik     | 320135 | 6    | 137600237 | 137612458 | +    |
| 19892 | 1438130_at   | Strain | Taf15             | 70439  | 11   | 83201097  | 83234729  | +    |
| 19893 | 1424454_at   | Strain | A930025J12Rik     | 211499 | 2    | 119869161 | 119917938 | -    |
| 19894 | 1458491_at   | Strain | 4930422I07Rik     | 71640  | 9    | 88910067  | 88931850  | +    |
| 19895 | 1455773_at   | Strain | None              | None   | NONE | NONE      | NONE      | NONE |
| 19896 | 1419130_at   | Strain | Deadc1            | 66757  | 10   | 13435001  | 13444624  | +    |
| 19897 | 1417462_at   | Strain | Cap1              | 12331  | 4    | 121886167 | 121899570 | -    |
| 19898 | 1459957_at   | Strain | Tnrc6             | 233833 | 7    | 117180427 | 117250357 | +    |
| 19899 | 1452705_at   | Strain | AA415817          | 94184  | 16   | 12571455  | 12638826  | -    |
| 19900 | 1433831_at   | Strain | 4833418A01Rik     | 75763  | 2    | 70753595  | 70786387  | +    |
| 19901 | 1446144_at   | Strain | Pex2              | 58869  | 3    | 32358790  | 32491207  | -    |
| 19902 | 1443153_at   | Strain | 6030460N08Rik     | 109181 | 12   | 97280506  | 97358629  | -    |
| 19903 | 1457847_at   | Strain | 9930116O05Rik     | 319758 | 9    | 72689193  | 72690196  | +    |
| 19904 | 1440274_at   | Strain | Rapgef4           | 56508  | 2    | 71679030  | 71954119  | +    |
| 19905 | 1454696_at   | Strain | Gnb1              | 14688  | 4    | 153983732 | 154050180 | +    |
| 19906 | 1441955_s_at | Strain | Paip1             | 218693 | 13   | 232       | 27441     | +    |
| 19907 | 1421360_at   | Strain | Inpp4a            | 269180 | 1    | 37652393  | 37702733  | +    |
| 19908 | 1460709_a_at | Strain | Bat5              | 193742 | 17   | 32793071  | 32806767  | +    |
| 19909 | 1425521_at   | Strain | Paip1             | 218693 | 13   | 232       | 27441     | +    |
| 19910 | 1423322_at   | Strain | Lin7c             | 22343  | 2    | 109514665 | 109524724 | +    |
| 19911 | 1422640_at   | Strain | Pcdhb9            | 93880  | 18   | 37624577  | 37627631  | +    |
| 19912 | 1425349_a_at | Strain | Myef2             | 17876  | 2    | 124602727 | 124630728 | -    |
| 19913 | 1419636_at   | Strain | 4833420G17Rik     | 67392  | 13   | 16951468  | 16974828  | +    |
| 19914 | 1429244_at   | Strain | 2610524H06Rik     | 330173 | NONE | NONE      | NONE      | NONE |
| 19915 | 1428778_at   | Strain | Sfi1              | 78887  | 11   | 3026676   | 3091300   | -    |
| 19916 | 1433293_at   | Strain | 1500032O14Rik     | 69027  | 13   | 70411011  | 70412067  | -    |
| 19917 | 1434962_x_at | Strain | Ccl27             | 20301  | 4    | 41908171  | 41908905  | -    |
|       |              |        | 4933439C20Rik /// |        |      |           |           |      |
| 19918 | 1436944_x_at | Strain | Pisd              | 236604 | 11   | 3020573   | 3026734   | +    |
| 19919 | 1422128_at   | Strain | Rpl14             | 67115  | 9    | 120583908 | 120587044 | +    |
| 19920 | 1452195_s_at | Strain | Sfi1              | 78887  | 11   | 3026676   | 3091300   | -    |
| 19921 | 1418701_at   | Strain | Comt              | 12846  | 16   | 17178593  | 17197565  | -    |
| 19922 | 1460662_at   | Strain | Per3              | 18628  | 4    | 149497074 | 149536951 | -    |
| 19923 | 1451240_a_at | Strain | Glo1              | 109801 | 17   | 28402993  | 28422646  | -    |
| 19924 | 1456257_at   | Strain | C130065N10Rik     | 319340 | 1    | 58829562  | 58831150  | -    |
| 19925 | 1448793_a_at | Strain | Sdc4              | 20971  | 2    | 163880980 | 163899921 | -    |
| 19926 | 1416494_at   | Strain | Ndufs5            | 170658 | 4    | 122739822 | 122743439 | -    |
| 19927 | 1426607_at   | Strain | None              | None   | NONE | NONE      | NONE      | NONE |
| 19928 | 1451242_a_at | Strain | Ppp5c             | 19060  | 7    | 13955563  | 13978781  | -    |
| 19929 | 1428381_a_at | Strain | 2700038C09Rik     | 66496  | 2    | 180904300 | 180905461 | +    |
| 19930 | 1438426_at   | Strain | 9330132O05Rik     | 77552  | 1    | 135221929 | 135225536 | -    |
| 19931 | 1431225_at   | Strain | Sox11             | 20666  | 12   | 23889533  | 23891005  | +    |
| 19932 | 1442893_at   | Strain | Lrrtm1            | 74342  | 6    | 77592843  | 77607877  | +    |
| 19933 | 1430648_at   | Strain | Scn2b             | 72821  | 9    | 45117694  | 45118924  | -    |
| 19934 | 1429870_at   | Strain | C630040K21Rik     | 78708  | 3    | 27777068  | 27777886  | +    |
| 19935 | 1429691_at   | Strain | 5430405N12Rik     | 71324  | 14   | 10699156  | 10701295  | +    |
|       |              |        | LOC224870 ///     |        |      |           |           |      |
|       |              |        | Phgdh ///         |        |      |           |           |      |
|       |              |        | LOC269242 ///     |        |      |           |           |      |
|       |              |        | LOC383450 ///     |        |      |           |           |      |
|       |              |        | LOC434173 ///     |        |      |           |           |      |
| 19936 | 1456471_x_at | Strain | LOC546010         | 224870 | 17   | 50730422  | 50732759  | +    |
| 19937 | 1433913_at   | Strain | C80913            | 19777  | 7    | 33124913  | 33183548  | -    |

|       |              |        |               |        |      |           |           |      |
|-------|--------------|--------|---------------|--------|------|-----------|-----------|------|
| 19938 | 1441373_at   | Strain | None          | None   | 11   | 88248088  | 88248903  | -    |
| 19939 | 1438758_at   | Strain | None          | None   | NONE | NONE      | NONE      | NONE |
| 19940 | 1440557_at   | Strain | lpw           | 16353  |      | 26442375  | 26443088  | +    |
| 19941 | 1454592_at   | Strain | 9430012M22Rik | 77244  | 3    | 54925280  | 54926282  | +    |
| 19942 | 1456518_at   | Strain | 4930422I07Rik | 71640  | 9    | 88910067  | 88931850  | +    |
| 19943 | 1425530_a_at | Strain | Stx3          | 20908  | 19   | 10973053  | 11015388  | -    |
| 19944 | 1456781_at   | Strain | Sox2          | 20674  | 3    | 34105755  | 34108159  | +    |
| 19945 | 1428368_at   | Strain | Arhgap21      | 71435  | 2    | 20889950  | 21009731  | -    |
| 19946 | 1438437_a_at | Strain | 4933439C10Rik | 74476  | 11   | 59235162  | 59235785  | +    |
| 19947 | 1438754_at   | Strain | None          | None   | NONE | NONE      | NONE      | NONE |
| 19948 | 1445204_at   | Strain | E030025D05Rik | 216613 | 11   | 28283605  | 28479086  | -    |
| 19949 | 1423216_a_at | Strain | 2510049I19Rik | 67922  | 8    | 71378153  | 71382197  | +    |
| 19950 | 1452660_s_at | Strain | Klhl7         | 52323  | 5    | 22564507  | 22624682  | +    |
| 19951 | 1443621_at   | Strain | ---           | 327959 | 11   | 72027329  | 72045073  | +    |
| 19952 | 1430375_a_at | Strain | Ccl27         | 20301  | 4    | 41908171  | 41908905  | -    |
| 19953 | 1424168_a_at | Strain | None          | None   | 4    | 138074245 | 138173019 | +    |
| 19954 | 1438644_x_at | Strain | CommD9        | 76501  | 2    | 101590945 | 101606322 | +    |
| 19955 | 1439845_at   | Strain | None          | None   | 4    | 137124969 | 137125945 | +    |
| 19956 | 1458585_at   | Strain | None          | None   | NONE | NONE      | NONE      | NONE |
| 19957 | 1460587_at   | Strain | B230215L15Rik | 320478 | 3    | 34133052  | 34133698  | +    |
| 19958 | 1417432_a_at | Strain | Gnb1          | 14688  | 4    | 153983732 | 154050180 | +    |
| 19959 | 1437892_at   | Strain | Zfp306        | 72739  | 13   | 20867145  | 20884810  | -    |
| 19960 | 1456655_at   | Strain | Ext1          | 14042  | 15   | 53068219  | 53345629  | -    |
| 19961 | 1439300_at   | Strain | None          | None   | X    | 97992310  | 97993041  | +    |
| 19962 | 1417259_a_at | Strain | Capzb         | 12345  | 4    | 138120169 | 138172527 | +    |
| 19963 | 1417461_at   | Strain | Cap1          | 12331  | 4    | 121886167 | 121899570 | -    |
|       |              |        | Rpl15 ///     |        |      |           |           |      |
| 19964 | 1434328_at   | Strain | LOC384179     | 384179 | 5    | 42671761  | 42701560  | -    |
| 19965 | 1426787_at   | Strain | Sfi1          | 78887  | 11   | 3026676   | 3091300   | -    |
| 19966 | 1429509_at   | Strain | None          | None   | 11   | 101983584 | 101984643 | -    |
| 19967 | 1456720_at   | Strain | ---           | 380686 | 11   | 16961308  | 16961698  | +    |
| 19968 | 1455682_at   | Strain | AA536808      | 98214  | 1    | 156550685 | 156552389 | +    |
| 19969 | 1437608_x_at | Strain | Ywhaq         | 22630  | 12   | 18728420  | 18754333  | +    |
| 19970 | 1444128_at   | Strain | 4933432P15Rik | 71302  | 18   | 39216929  | 39600082  | +    |
| 19971 | 1447517_at   | Strain | Skiv2l2       | 72198  | 13   | 109262266 | 109322348 | -    |
| 19972 | 1429628_at   | Strain | 6330407J23Rik | 67412  | 10   | 29174943  | 29230605  | +    |
| 19973 | 1417849_at   | Strain | MGI:2180715   | 170753 | 3    | 9425289   | 9606906   | -    |
| 19974 | 1455806_x_at | Strain | Ndufa12       | 66414  | 10   | 94172393  | 94194766  | +    |
| 19975 | 1453297_at   | Strain | 4933417O08Rik | 71146  | 19   | 41800115  | 41814754  | +    |
| 19976 | 1449603_at   | Strain | AI594671      | 103795 | 11   | 39775166  | 39775334  | -    |
| 19977 | 1447938_at   | Strain | LOC545608     | 545608 | 4    | 42087810  | 42117024  | -    |
| 19978 | 1444260_at   | Strain | None          | None   | 1    | 67773063  | 67773539  | +    |
| 19979 | 1441388_at   | Strain | None          | None   | 18   | 70861108  | 70861785  | +    |
| 19980 | 1443100_at   | Strain | ---           | 380887 | 14   | 16345175  | 16345719  | +    |
| 19981 | 1447894_x_at | Strain | Vps52         | 224705 | 17   | 31670801  | 31670899  | +    |
| 19982 | 1434375_at   | Strain | B930006L02Rik | 319604 | 7    | 94813378  | 94948322  | +    |
| 19983 | 1416524_at   | Strain | Spop          | 20747  | 11   | 95235201  | 95314100  | +    |
| 19984 | 1424877_a_at | Strain | Alad          | 17025  | 4    | 61600361  | 61611254  | -    |
| 19985 | 1436846_x_at | Strain | LOC546165     | 546165 | 9    | 119152266 | 119158348 | +    |
| 19986 | 1441573_at   | Strain | Scmh1         | 29871  | 4    | 119469474 | 119552399 | +    |
| 19987 | 1444890_at   | Strain | AA536749      | 26936  | 11   | 59388161  | 59501851  | +    |
| 19988 | 1449964_a_at | Strain | Mlycd         | 56690  | NONE | NONE      | NONE      | NONE |
|       |              |        | Acaa1 ///     |        |      |           |           |      |
| 19989 | 1416947_s_at | Strain | MGC29978      | 113868 | 9    | 119335555 | 119344556 | +    |
| 19990 | 1451626_x_at | Strain | None          | None   | NONE | NONE      | NONE      | NONE |
| 19991 | 1439630_x_at | Strain | MGI:2446326   | 282619 | 7    | 26160849  | 26165448  | +    |
| 19992 | 1418349_at   | Strain | Hbegf         | 15200  | 18   | 36728734  | 36739576  | -    |
| 19993 | 1430485_at   | Strain | 3010009O07Rik | 76847  | 7    | 96171709  | 96173586  | +    |
| 19994 | 1454751_at   | Strain | G430022H21Rik | 210529 | 3    | 122159943 | 122177594 | -    |
| 19995 | 1443239_at   | Strain | Mtap2         | 17756  | 1    | 66623478  | 66624138  | +    |
| 19996 | 1417648_s_at | Strain | Snx5          | 69178  | 2    | 143707062 | 143727467 | -    |
| 19997 | 1428418_s_at | Strain | 3110050N22Rik | 67306  | 3    | 7478034   | 7528335   | +    |

LOC544986 ///  
 LOC544988 ///  
 LOC544991 ///  
 LOC545001 ///  
 LOC545005 ///  
 LOC545007 ///  
 2610042L04Rik ///

|       |              |        |                   |        |    |           |           |   |
|-------|--------------|--------|-------------------|--------|----|-----------|-----------|---|
| 19998 | 1428301_at   | Strain | LOC545017         | 544986 | 14 | 3010193   | 3030911   | + |
| 19999 | 1438691_at   | Strain | Zzef1             | 195018 | 11 | 72599528  | 72652778  | + |
| 20000 | 1436040_at   | Strain | 2310005L22Rik     | 69471  | 4  | 131105578 | 131107910 | + |
| 20001 | 1424336_at   | Strain | 8430432M10Rik     | 66812  | 9  | 57526299  | 57551131  | - |
| 20002 | 1417087_at   | Strain | Glg1              | 20340  | 8  | 110455266 | 110556791 | - |
| 20003 | 1459897_a_at | Strain | MGI:2446326       | 282619 | 7  | 26160849  | 26165448  | + |
| 20004 | 1452665_at   | Strain | 2610511O17Rik     | 74196  | 17 | 72525543  | 72670806  | + |
| 20005 | 1419040_at   | Strain | Cyp2d22           | 56448  | 15 | 82422189  | 82430879  | - |
| 20006 | 1422998_a_at | Strain | Glrx2             | 69367  | 1  | 143571711 | 143578676 | + |
| 20007 | 1449083_at   | Strain | 1810060J02Rik     | 67015  | 6  | 148405067 | 148561800 | + |
| 20008 | 1441684_at   | Strain | Ttc3              | 22129  | 16 | 93778128  | 93866771  | + |
| 20009 | 1458886_at   | Strain | Spop              | 20747  | 11 | 95235201  | 95314100  | + |
| 20010 | 1425320_at   | Strain | A830023I12Rik     | 320875 | 5  | 109178408 | 109186230 | + |
| 20011 | 1420889_at   | Strain | Hccs              | 15159  | X  | 162910940 | 162919685 | - |
| 20012 | 1423205_at   | Strain | Tm9sf4            | 99237  | 2  | 152618237 | 152667399 | + |
| 20013 | 1430026_at   | Strain | Stch              | 110920 | 16 | 74838985  | 74850259  | - |
| 20014 | 1445427_at   | Strain | Nlk               | 18099  | 11 | 78292827  | 78423032  | - |
| 20015 | 1416103_at   | Strain | Ywhaz             | 22631  | 15 | 36773662  | 36797651  | - |
| 20016 | 1437070_at   | Strain | Cdc14b            | 218294 | 13 | 61579944  | 61659178  | - |
| 20017 | 1425029_a_at | Strain | Oact2             | 67216  | 12 | 21381378  | 21511358  | + |
| 20018 | 1442466_a_at | Strain | B430315C20Rik     | 327655 | 2  | 120824412 | 120864866 | - |
| 20019 | 1449018_at   | Strain | Pfn1              | 18643  | 11 | 70377507  | 70380293  | - |
| 20020 | 1443772_at   | Strain | Cldn10            | 58187  | 14 | 113343391 | 113430546 | + |
| 20021 | 1451457_at   | Strain | Sc5d              | 235293 | 9  | 42213010  | 42223066  | - |
| 20022 | 1438435_at   | Strain | None              | None   | 7  | 92260395  | 92261273  | - |
| 20023 | 1442241_at   | Strain | Srpk2             | 20817  | 5  | 21967253  | 22080468  | - |
| 20024 | 1419039_at   | Strain | Cyp2d22           | 56448  | 15 | 82422189  | 82430879  | - |
| 20025 | 1426164_a_at | Strain | Usf1              | 22278  | 1  | 171340520 | 171347582 | + |
| 20026 | 1448799_s_at | Strain | Mrps12            | 24030  | 7  | 24145890  | 24147995  | - |
| 20027 | 1415966_a_at | Strain | Ndufv1            | 17995  | 19 | 3796295   | 3801515   | - |
| 20028 | 1453749_at   | Strain | 2610507I01Rik     | 72203  | 11 | 58923888  | 58925105  | - |
| 20029 | 1435948_at   | Strain | 5930418K15Rik     | 77106  | 13 | 45825942  | 45833503  | - |
| 20030 | 1453752_at   | Strain | Rpl17             | 319195 | 18 | 75235707  | 75238565  | + |
| 20031 | 1457324_at   | Strain | None              | None   | 4  | 42079370  | 42080219  | + |
| 20032 | 1417714_x_at | Strain | Hba-a1            | 15122  | 11 | 32178468  | 32179287  | + |
| 20033 | 1426904_s_at | Strain | None              | None   | 2  | 80013449  | 80051797  | + |
| 20034 | 1441100_at   | Strain | Mbtd1             | 103537 | 11 | 93733496  | 93766406  | + |
| 20035 | 1436713_s_at | Strain | None              | None   | 12 | 105022871 | 105023459 | + |
| 20036 | 1428655_at   | Strain | 1110018J12Rik     | 73825  | 17 | 86391811  | 86450187  | + |
| 20037 | 1457260_at   | Strain | 7530403E16Rik     | 100224 | 4  | 125640721 | 125641485 | + |
| 20038 | 1440573_at   | Strain | None              | None   | 13 | 100116358 | 100116927 | - |
| 20039 | 1423597_at   | Strain | Atp8a1            | 11980  | 5  | 66388740  | 66614923  | - |
| 20040 | 1452593_a_at | Strain | Tceb1             | 67923  | 1  | 16827250  | 16842139  | - |
| 20041 | 1456746_a_at | Strain | Cd99I2            | 171486 | X  | 66088561  | 66161136  | - |
| 20042 | 1436967_at   | Strain | Ankrd11           | 77087  | 8  | 122264618 | 122423554 | - |
| 20043 | 1426544_a_at | Strain | Ttc14             | 67120  | 3  | 33243957  | 33251783  | + |
| 20044 | 1456947_at   | Strain | Pafah1b1          | 18472  | 11 | 74399613  | 74450328  | - |
| 20045 | 1437536_at   | Strain | Fkrp              | 243853 | 7  | 13760291  | 13767676  | - |
| 20046 | 1439578_at   | Strain | Lsm11             | 72290  | 11 | 45683917  | 45697772  | - |
| 20047 | 1439170_at   | Strain | None              | None   | 8  | 32209525  | 32210204  | + |
| 20048 | 1436506_a_at | Strain | 1110008H02Rik     | 73824  | 1  | 10047073  | 10049162  | - |
| 20049 | 1415690_at   | Strain | Mrpl27            | 94064  | 11 | 94474878  | 94481174  | + |
| 20050 | 1428083_at   | Strain | 2310043N10Rik     | 66961  | 19 | 5631092   | 5633434   | - |
| 20051 | 1418908_at   | Strain | Pam               | 18484  | 1  | 97601180  | 97757218  | - |
| 20052 | 1432646_a_at | Strain | 2900097C17Rik     | 347740 | 6  | 118152376 | 118153424 | + |
|       |              |        | A630033E08Rik /// |        |    |           |           |   |
| 20053 | 1437128_a_at | Strain | C730040L01Rik     | 240041 | 17 | 20768707  | 20772918  | - |
| 20054 | 1433497_at   | Strain | Aqr               | 11834  | 2  | 113615012 | 113689159 | - |

|       |              |        |                    |        |      |           |           |      |
|-------|--------------|--------|--------------------|--------|------|-----------|-----------|------|
| 20055 | 1439650_at   | Strain | Rtn4               | 68585  | 11   | 29587737  | 29637706  | +    |
| 20056 | 1437537_at   | Strain | Casp9              | 12371  | 4    | 140674873 | 140697236 | +    |
| 20057 | 1415844_at   | Strain | Syt4               | 20983  | 18   | 31677574  | 31687445  | -    |
| 20058 | 1443905_at   | Strain | None               | None   | 5    | 128723621 | 128724771 | +    |
| 20059 | 1453960_a_at | Strain | Capzb              | 12345  | 4    | 138120169 | 138172527 | +    |
| 20060 | 1435163_at   | Strain | 9030612M13Rik      | 208292 | 17   | 30596599  | 30610894  | -    |
| 20061 | 1418462_at   | Strain | Exosc9             | 50911  | 3    | 36016246  | 36029330  | +    |
| 20062 | 1439069_a_at | Strain | 4933439C20Rik      | 236604 | 11   | 3020573   | 3026734   | +    |
| 20063 | 1418427_at   | Strain | Kif5b              | 16573  | 18   | 6245790   | 6284051   | -    |
| 20064 | 1438462_x_at | Strain | None               | None   | 4    | 128741972 | 128742465 | -    |
| 20065 | 1434362_at   | Strain | AW550831           | 98715  | 1    | 156331330 | 156332635 | -    |
| 20066 | 1423204_at   | Strain | Tm9sf4             | 99237  | 2    | 152618237 | 152667399 | +    |
| 20067 | 1444057_at   | Strain | Ubx2               | 67812  | 1    | 128087153 | 128120583 | +    |
| 20068 | 1442886_at   | Strain | 1500010G04Rik      | 68965  | 6    | 49394626  | 49398413  | -    |
| 20069 | 1436617_at   | Strain | Cetn4              | 207175 | 3    | 36772225  | 36776044  | -    |
| 20070 | 1451447_at   | Strain | Cuedc1             | 103841 | 11   | 87827241  | 87920907  | +    |
| 20071 | 1449262_s_at | Strain | Lin7c              | 22343  | 2    | 109514665 | 109524724 | +    |
| 20072 | 1428738_a_at | Strain | D14Ert449e         | 66039  | 14   | 24299743  | 24302783  | -    |
| 20073 | 1455217_at   | Strain | Lrig2              | 269473 | 3    | 103881767 | 103882395 | -    |
| 20074 | 1452426_x_at | Strain | None               | None   | NONE | NONE      | NONE      | NONE |
| 20075 | 1456685_at   | Strain | Nsg2               | 18197  | 11   | 31895253  | 31953996  | +    |
| 20076 | 1429729_at   | Strain | Syt11              | 229521 | 3    | 88489566  | 88516404  | -    |
| 20077 | 1455550_x_at | Strain | None               | None   | 2    | 163081580 | 163082102 | -    |
| 20078 | 1448959_at   | Strain | Ndufs4             | 17993  | 13   | 110702711 | 110802452 | -    |
| 20079 | 1435514_at   | Strain | Lztf11             | 93730  | 9    | 123721311 | 123741507 | -    |
| 20080 | 1452825_at   | Strain | 5330410G16Rik      | 67937  | 8    | 69638900  | 69642391  | -    |
| 20081 | 1418887_a_at | Strain | D11Wsu99e          | 28081  | 11   | 113482413 | 113505125 | -    |
| 20082 | 1440682_at   | Strain | Odz4               | 23966  | 7    | 90212889  | 90948341  | +    |
| 20083 | 1445561_at   | Strain | B130020M22Rik      | 320217 | 10   | 119196017 | 119196541 | +    |
| 20084 | 1451993_at   | Strain | 9130404D08Rik      | 74549  | 8    | 69170702  | 69194854  | -    |
| 20085 | 1448368_at   | Strain | Dctn6              | 22428  | 8    | 32891565  | 32909677  | -    |
| 20086 | 1443881_at   | Strain | Pofut1             | 140484 | 2    | 152698491 | 152724222 | +    |
|       |              |        | 4933439C20Rik ///  |        |      |           |           |      |
| 20087 | 1435426_s_at | Strain | Pisd               | 236604 | 11   | 3020573   | 3026734   | +    |
| 20088 | 1453206_at   | Strain | Acad9              | 229211 | 3    | 35519660  | 35569683  | +    |
| 20089 | 1439195_at   | Strain | None               | None   | 13   | 87636579  | 87637361  | +    |
| 20090 | 1426631_at   | Strain | C330017I15Rik      | 78697  | 5    | 22205737  | 22247905  | -    |
| 20091 | 1459726_at   | Strain | Ptpn2              | 19276  | 12   | 112490374 | 113040421 | +    |
| 20092 | 1453278_a_at | Strain | Rsnl2              | 78785  | 17   | 69558453  | 69633262  | +    |
| 20093 | 1419612_at   | Strain | 4632415L05Rik      | 70808  | 3    | 19236160  | 19237248  | +    |
| 20094 | 1429093_at   | Strain | Ddi2               | 68817  | 4    | 140561546 | 140564869 | -    |
|       |              |        | Ccrn4l /// lap /// |        |      |           |           |      |
|       |              |        | LOC280487 ///      |        |      |           |           |      |
| 20095 | 1448715_x_at | Strain | LOC432899          | 12457  | 3    | 50820528  | 50883543  | +    |
| 20096 | 1417185_at   | Strain | Ly6a               | 110454 | 15   | 75027582  | 75030593  | -    |
| 20097 | 1428692_at   | Strain | 1110033O09Rik      | 68695  | 7    | 74143304  | 74146265  | +    |
| 20098 | 1428437_at   | Strain | 2700023B17Rik      | 67070  | 7    | 29498435  | 29543405  | -    |
| 20099 | 1428417_at   | Strain | 3110050N22Rik      | 67306  | 3    | 7478034   | 7528335   | +    |
| 20100 | 1439882_at   | Strain | None               | None   | 7    | 122858919 | 122859373 | +    |
| 20101 | 1452726_a_at | Strain | 1110061L23Rik      | 68845  | 7    | 39230940  | 39236606  | +    |
| 20102 | 1452696_a_at | Strain | 4933439C10Rik      | 74476  | 11   | 59231291  | 59236892  | +    |
| 20103 | 1455316_x_at | Strain | Ccrn4l             | 12457  | 3    | 50820528  | 50883543  | +    |
| 20104 | 1428568_at   | Strain | B230217C12Rik      | 68127  | 11   | 97661980  | 97664130  | +    |
| 20105 | 1429502_at   | Strain | Stch               | 110920 | 16   | 74838985  | 74850259  | -    |
| 20106 | 1437142_a_at | Strain | Pigo               | 56703  | 4    | 42933560  | 42941678  | -    |
| 20107 | 1438969_x_at | Strain | Dhx30              | 72831  | 9    | 110110278 | 110141557 | -    |
| 20108 | 1423000_a_at | Strain | Dgke               | 56077  | 11   | 88861819  | 88881472  | -    |
| 20109 | 1437538_at   | Strain | 2610002F03Rik      | 72091  | 2    | 26569338  | 26570141  | -    |
| 20110 | 1440296_at   | Strain | Gm994              | 381345 | 1    | 178099620 | 178124237 | +    |
| 20111 | 1439059_at   | Strain | BC031748           | 245622 | X    | 130594568 | 130622430 | +    |
| 20112 | 1421163_a_at | Strain | Nfia               | 18027  | 4    | 96752972  | 97087465  | +    |
| 20113 | 1444164_at   | Strain | Fkbp3              | 30795  | 12   | 61840122  | 61851631  | -    |
| 20114 | 1458065_at   | Strain | Rere               | 68703  | 4    | 148898702 | 149114159 | +    |
| 20115 | 1440498_at   | Strain | Rabif              | 98710  | 1    | 134344923 | 134358148 | +    |
| 20116 | 1437558_at   | Strain | B130021B11Rik      | 320860 | 15   | 12838709  | 12840317  | -    |

|       |              |        |               |        |      |           |           |      |
|-------|--------------|--------|---------------|--------|------|-----------|-----------|------|
| 20117 | 1452799_at   | Strain | 2310009E04Rik | 75578  | 4    | 94554575  | 94796641  | +    |
| 20118 | 1432589_at   | Strain | None          | None   | 2    | 160225070 | 160226730 | +    |
| 20119 | 1431020_a_at | Strain | Fgfr1op2      | 67529  | 6    | 147498625 | 147519880 | +    |
|       |              |        | Masp2 ///     |        |      |           |           |      |
| 20120 | 1420524_a_at | Strain | LOC547378     | 17175  | 4    | 147094908 | 147107844 | +    |
| 20121 | 1448419_at   | Strain | Pop4          | 66161  | 7    | 33430376  | 33438904  | -    |
| 20122 | 1453246_at   | Strain | Rab39b        | 67790  | X    | 70232713  | 70238859  | -    |
| 20123 | 1428370_at   | Strain | 1500011B03Rik | 66236  | 5    | 113917783 | 113923550 | -    |
| 20124 | 1440248_at   | Strain | Casc4         | 319996 | 2    | 121380983 | 121449712 | +    |
| 20125 | 1432391_at   | Strain | Ccdc21        | 70012  | 4    | 133090758 | 133147949 | -    |
| 20126 | 1422591_at   | Strain | Tceb3         | 27224  | 4    | 134884627 | 134902906 | -    |
| 20127 | 1433665_at   | Strain | Vps41         | 218035 | 13   | 18192301  | 18341778  | +    |
| 20128 | 1441493_at   | Strain | Rab6ip2       | 111173 | 6    | 120007511 | 120280559 | -    |
| 20129 | 1434949_at   | Strain | Armc8         | 74125  | 9    | 99381642  | 99469875  | -    |
| 20130 | 1448891_at   | Strain | Msr2          | 80891  | 3    | 86995152  | 87007982  | -    |
| 20131 | 1458188_at   | Strain | Dpysl2        | 12934  | 14   | 61332083  | 61398082  | -    |
| 20132 | 1417210_at   | Strain | Eif2s3y       | 26908  | Y    | 347054    | 365036    | +    |
| 20133 | 1442364_at   | Strain | Mapk14        | 26416  | 17   | 26492551  | 26549631  | +    |
| 20134 | 1429335_at   | Strain | Snopc1        | 75627  | 12   | 70812924  | 70832758  | +    |
| 20135 | 1459747_at   | Strain | None          | None   | 4    | 35091185  | 35091393  | +    |
| 20136 | 1416245_at   | Strain | Aurkaip1      | 66077  | 4    | 154324008 | 154325421 | +    |
| 20137 | 1430660_at   | Strain | 5830417110Rik | 76022  | 3    | 420       | 48501     | +    |
| 20138 | 1444147_at   | Strain | Pcsk2         | 18549  | 2    | 143003115 | 143273220 | +    |
| 20139 | 1452848_at   | Strain | 5930418K15Rik | 77106  |      | 81196364  | 81197494  | +    |
| 20140 | 1458376_at   | Strain | B930025B16Rik | 503851 | 14   | 114911692 | 114912335 | +    |
| 20141 | 1439928_at   | Strain | None          | None   | 11   | 30119337  | 30119976  | -    |
| 20142 | 1436239_at   | Strain | Slc5a5        | 114479 | 8    | 70039215  | 70048437  | -    |
| 20143 | 1423696_a_at | Strain | Psmc6         | 66413  | 14   | 12574333  | 12583052  | -    |
| 20144 | 1452077_at   | Strain | Ddx3y         | 26900  | Y    | 598006    | 622997    | -    |
| 20145 | 1446972_at   | Strain | D15Wsu126e    | 28112  | 15   | 53308367  | 53308935  | -    |
| 20146 | 1448822_at   | Strain | Psmc6         | 19175  | 11   | 70251058  | 70253307  | +    |
| 20147 | 1437358_at   | Strain | Wdfy1         | 69368  | 1    | 80056762  | 80093054  | -    |
| 20148 | 1445411_at   | Strain | None          | None   | NONE | NONE      | NONE      | NONE |
| 20149 | 1442255_at   | Strain | 5033414D02Rik | 67759  | 19   | 28601276  | 28614470  | -    |
| 20150 | 1419839_x_at | Strain | Prp19         | 28000  | 19   | 10091789  | 10102029  | +    |
| 20151 | 1435523_s_at | Strain | 2700089E24Rik | 381820 | 6    | 133875346 | 133882217 | +    |
| 20152 | 1442058_s_at | Strain | Psmc3ip       | 19183  | 11   | 100913244 | 100916490 | -    |
| 20153 | 1457637_at   | Strain | ---           | 432977 | 15   | 93659677  | 93659981  | -    |
| 20154 | 1455719_at   | Strain | Tubb5         | 22154  | 17   | 33552072  | 33555475  | -    |
| 20155 | 1444806_at   | Strain | 6720456B07Rik | 101314 | 6    | 114172603 | 114184782 | +    |
| 20156 | 1439299_at   | Strain | None          | None   | 11   | 30134727  | 30135502  | -    |
| 20157 | 1453144_at   | Strain | 4933439C20Rik | 236604 | 11   | 3020573   | 3026734   | +    |
| 20158 | 1417063_at   | Strain | C1qb          | 12260  | 4    | 135761402 | 135767434 | -    |
| 20159 | 1458426_at   | Strain | Kif1b         | 16561  | 4    | 147668683 | 147799980 | -    |
| 20160 | 1420890_at   | Strain | Hccs          | 15159  | X    | 162910940 | 162919685 | -    |
| 20161 | 1441172_at   | Strain | None          | None   | 1    | 38887870  | 38888631  | -    |
| 20162 | 1422807_at   | Strain | Arf5          | 11844  | 6    | 28470635  | 28473494  | +    |
| 20163 | 1420862_at   | Strain | Dctn4         | 67665  | 18   | 60751547  | 60784088  | +    |
| 20164 | 1429822_at   | Strain | 4633401B06Rik | 70828  | 3    | 120566391 | 120567466 | -    |
| 20165 | 1416745_x_at | Strain | Uap1          | 107652 | 1    | 170076180 | 170109123 | -    |
| 20166 | 1426905_a_at | Strain | Dnajc10       | 66861  | 2    | 80013538  | 80050631  | +    |
| 20167 | 1425966_x_at | Strain | Ubc           | 22190  | 11   | 124553698 | 124555581 | -    |
| 20168 | 1442148_at   | Strain | Psip1         | 101739 | 4    | 82441872  | 82472582  | -    |
| 20169 | 1450740_a_at | Strain | Mapre1        | 13589  | 2    | 153198313 | 153225162 | +    |
| 20170 | 1435129_at   | Strain | Ptp4a2        | 19244  | 4    | 128866586 | 128877088 | +    |
| 20171 | 1428973_s_at | Strain | 0610012D17Rik | 66061  | 16   | 31229115  | 31238469  | +    |
| 20172 | 1417705_at   | Strain | Otub1         | 107260 | 19   | 6912051   | 6920129   | -    |
| 20173 | 1423747_a_at | Strain | Pdk1          | 228026 | 2    | 71570967  | 71599744  | +    |
| 20174 | 1427797_s_at | Strain | Ctse          | 13034  | 1    | 131488640 | 131525829 | +    |
| 20175 | 1429452_x_at | Strain | 4933439C20Rik | 236604 | 11   | 3020573   | 3026734   | +    |
| 20176 | 1451045_at   | Strain | Syt13         | 80976  | 2    | 92619784  | 92660734  | +    |
| 20177 | 1455342_at   | Strain | A230083H22Rik | 353211 | 19   | 16447395  | 16448035  | +    |
| 20178 | 1435925_at   | Strain | Git2          | 26431  | 5    | 113837037 | 113883117 | -    |
| 20179 | 1420329_at   | Strain | 4930455C21Rik | 76916  | 16   | 37316787  | 37341355  | -    |

|       |              |        |                   |        |      |           |           |      |
|-------|--------------|--------|-------------------|--------|------|-----------|-----------|------|
|       |              |        | LOC544986 ///     |        |      |           |           |      |
|       |              |        | LOC544991 ///     |        |      |           |           |      |
|       |              |        | LOC544997 ///     |        |      |           |           |      |
|       |              |        | B930046C15Rik /// |        |      |           |           |      |
|       |              |        | LOC545001 ///     |        |      |           |           |      |
|       |              |        | LOC545005 ///     |        |      |           |           |      |
|       |              |        | LOC545007 ///     |        |      |           |           |      |
|       |              |        | LOC545008 ///     |        |      |           |           |      |
|       |              |        | 2610042L04Rik /// |        |      |           |           |      |
| 20180 | 1452731_x_at | Strain | LOC545017         | 544986 | 14   | 3010193   | 3030911   | +    |
| 20181 | 1458235_at   | Strain | Fbxl17            | 50758  | 17   | 60753894  | 60800293  | -    |
| 20182 | 1438989_s_at | Strain | B130021B11Rik     | 320860 | 15   | 12839586  | 12839830  | -    |
| 20183 | 1428823_at   | Strain | 2310057G13Rik     | 69692  | 10   | 31353580  | 31368402  | +    |
| 20184 | 1418148_at   | Strain | Abhd1             | 57742  | 5    | 29409016  | 29414035  | +    |
| 20185 | 1444377_at   | Strain | Psmb2             | 26445  | 4    | 125704779 | 125736819 | +    |
| 20186 | 1429337_at   | Strain | 2610301K12Rik     | 72477  | 2    | 128332164 | 128366477 | +    |
| 20187 | 1456430_at   | Strain | D3Erd789e         | 51938  | 3    | 33256108  | 33288047  | -    |
| 20188 | 1443158_at   | Strain | Scmh1             | 29871  | 4    | 119469474 | 119552399 | +    |
| 20189 | 1440278_at   | Strain | None              | None   | 5    | 114406747 | 114407677 | -    |
| 20190 | 1426573_at   | Strain | Me2               | 107029 | 18   | 74004269  | 74049621  | -    |
| 20191 | 1447458_at   | Strain | Siat4c            | 20443  | 9    | 34960623  | 35030854  | -    |
| 20192 | 1427328_a_at | Strain | Clasp2            | 76499  | 9    | 113865413 | 113971281 | +    |
| 20193 | 1426270_at   | Strain | Smc511            | 226026 | 19   | 22446187  | 22511419  | -    |
|       |              |        | 1700029I01Rik /// |        |      |           |           |      |
|       |              |        | LOC433791 ///     |        |      |           |           |      |
| 20194 | 1424784_at   | Strain | LOC545705         | 433791 | 4    | 145055149 | 145074355 | -    |
| 20195 | 1430332_a_at | Strain | Gusb              | 110006 | 5    | 129158844 | 129172652 | -    |
| 20196 | 1460466_at   | Strain | 1700047I17Rik     | 73385  | 12   | 51918988  | 51936568  | +    |
| 20197 | 1429073_at   | Strain | 2210015D19Rik     | 76508  | 11   | 5656916   | 5679497   | +    |
| 20198 | 1425113_x_at | Strain | None              | None   | NONE | NONE      | NONE      | NONE |
| 20199 | 1419423_at   | Strain | Stab2             | 192188 | 10   | 86815870  | 86982604  | -    |
| 20200 | 1446799_at   | Strain | None              | None   | 2    | 67473789  | 67474327  | +    |
| 20201 | 1457458_at   | Strain | None              | None   | 7    | 13351413  | 13352345  | +    |
| 20202 | 1457797_at   | Strain | Al605517          | 106622 | 17   | 79337776  | 79338412  | -    |
| 20203 | 1449076_x_at | Strain | AL024210          | 104923 | 12   | 25240447  | 25247415  | +    |
| 20204 | 1428336_at   | Strain | Agpat4            | 68262  | 17   | 10758734  | 10859090  | +    |
| 20205 | 1438678_at   | Strain | 1500011K16Rik     | 67885  | 2    | 127305241 | 127306341 | -    |
| 20206 | 1440695_at   | Strain | None              | None   | 17   | 21087116  | 21087528  | -    |
| 20207 | 1446332_at   | Strain | Pcdhga12          | 93724  | 18   | 37969124  | 37969796  | +    |
| 20208 | 1454112_a_at | Strain | 2410007P03Rik     | 66296  | 2    | 120123285 | 120133662 | +    |
| 20209 | 1419356_at   | Strain | Klf7              | 93691  | 1    | 64328681  | 64414407  | -    |
| 20210 | 1447750_x_at | Strain | 1110061L23Rik     | 68845  | 7    | 39230940  | 39236606  | +    |
| 20211 | 1436670_x_at | Strain | 1700019G17Rik     | 75541  | 6    | 86328677  | 86334511  | -    |
| 20212 | 1459942_at   | Strain | ORF34             | 207375 | X    | 144878618 | 145004200 | +    |
| 20213 | 1452730_at   | Strain | 1110033J19Rik     | 66184  | 6    | 149288478 | 149289420 | +    |
| 20214 | 1424903_at   | Strain | Jarid1d           | 20592  | Y    | 234392    | 280253    | +    |
| 20215 | 1455219_at   | Strain | 1110030E23Rik     | 68681  | 7    | 120739199 | 120740167 | -    |
| 20216 | 1458920_at   | Strain | Stx6              | 58244  | 1    | 155049479 | 155094254 | +    |
| 20217 | 1417600_at   | Strain | Slc15a2           | 57738  | 16   | 35567606  | 35602387  | -    |
| 20218 | 1431380_at   | Strain | 5730409L17Rik     | 70499  | 6    | 8695789   | 8697330   | -    |
| 20219 | 1422903_at   | Strain | Ly86              | 17084  | 13   | 36887185  | 36960718  | +    |
| 20220 | 1427437_at   | Strain | 2610203C20Rik     | 70455  | 9    | 41538340  | 41539795  | +    |
| 20221 | 1418245_a_at | Strain | Rbm9              | 93686  | 15   | 77134294  | 77358885  | -    |
| 20222 | 1433815_at   | Strain | MGI:1923321       | 76071  | 5    | 35557428  | 35631807  | +    |
| 20223 | 1443541_at   | Strain | None              | None   | 3    | 37177674  | 37178229  | -    |
| 20224 | 1446750_at   | Strain | Impact            | 16210  | 18   | 13160301  | 13180997  | +    |
| 20225 | 1457551_at   | Strain | Acvr1             | 11477  | 2    | 58371977  | 58441698  | -    |
|       |              |        | Acaa1 ///         |        |      |           |           |      |
| 20226 | 1416946_a_at | Strain | MGC29978          | 113868 | 9    | 119335555 | 119344556 | +    |
| 20227 | 1447206_at   | Strain | Arhgap21          | 71435  | 2    | 20889950  | 21009731  | -    |
| 20228 | 1441643_at   | Strain | 38414             | 320253 | 18   | 56982085  | 57143467  | -    |
| 20229 | 1418141_at   | Strain | Dcx               | 13193  | X    | 137295888 | 137373265 | -    |
| 20230 | 1436644_x_at | Strain | Tmem25            | 71687  | 9    | 44782634  | 44788071  | -    |
| 20231 | 1426988_at   | Strain | Klhdc5            | 232539 | 6    | 148018350 | 148040641 | +    |
| 20232 | 1434585_at   | Strain | Tulp4             | 68842  | 17   | 6045120   | 6146999   | +    |



|       |              |        |               |        |      |           |           |      |
|-------|--------------|--------|---------------|--------|------|-----------|-----------|------|
| 20233 | 1452677_at   | Strain | Pnpt1         | 71701  | 11   | 29025541  | 29056618  | +    |
| 20234 | 1433816_at   | Strain | Mcart1        | 230125 | 4    | 45311988  | 45320724  | -    |
| 20235 | 1454772_at   | Strain | Ascc31        | 320632 | 2    | 126722257 | 126754304 | +    |
| 20236 | 1425263_a_at | Strain | Mbp           | 17196  | 18   | 82642914  | 82753380  | +    |
| 20237 | 1426438_at   | Strain | Ddx3y         | 26900  | Y    | 598006    | 622997    | -    |
| 20238 | 1416402_at   | Strain | Abcb10        | 56199  | 8    | 123239531 | 123269924 | -    |
| 20239 | 1438249_at   | Strain | Usp7          | 252870 | 16   | 8364073   | 8389916   | -    |
| 20240 | 1442279_at   | Strain | Epc1          | 13831  | 18   | 6478658   | 6558794   | -    |
| 20241 | 1427338_at   | Strain | Crocc         | 230872 | 4    | 139897898 | 139934922 | -    |
| 20242 | 1421036_at   | Strain | Npas2         | 18143  | 1    | 39491116  | 39659103  | +    |
| 20243 | 1435284_at   | Strain | Rtn4          | 68585  | 11   | 29587737  | 29637706  | +    |
| 20244 | 1455208_at   | Strain | Pex19         | 19298  | 1    | 172055691 | 172064699 | +    |
| 20245 | 1416743_at   | Strain | Uap1          | 107652 | 1    | 170076180 | 170109123 | -    |
| 20246 | 1424324_at   | Strain | Esco1         | 77805  | 18   | 10611852  | 10655599  | -    |
| 20247 | 1445214_at   | Strain | None          | None   | 4    | 146008858 | 146078637 | +    |
| 20248 | 1439058_at   | Strain | Sfpq          | 71514  | 4    | 126048448 | 126057909 | +    |
| 20249 | 1429410_at   | Strain | Eny2          | 223527 | 15   | 44373735  | 44383309  | +    |
| 20250 | 1458203_at   | Strain | Spire1        | 68166  | 18   | 67718995  | 67783507  | -    |
| 20251 | 1431328_at   | Strain | Ppp1cb        | 19046  | 5    | 30917485  | 30950978  | +    |
| 20252 | 1424778_at   | Strain | D10Ucla1      | 28193  | 10   | 67048137  | 67134030  | -    |
| 20253 | 1443638_at   | Strain | None          | None   | 15   | 30186958  | 30187416  | +    |
| 20254 | 1427998_at   | Strain | 2600001B17Rik | 268490 | 11   | 101984576 | 102006343 | -    |
| 20255 | 1438832_x_at | Strain | Dhx30         | 72831  | 9    | 110110278 | 110141557 | -    |
| 20256 | 1428302_at   | Strain | Mrpl48        | 52443  | 7    | 94655385  | 94714672  | -    |
| 20257 | 1457259_at   | Strain | None          | None   |      | 61687581  | 61687804  | +    |
| 20258 | 1431880_at   | Strain | 3100003M19Rik | 73082  | 18   | 16792263  | 16794254  | -    |
| 20259 | 1448580_at   | Strain | Glg1          | 20340  | 8    | 110455266 | 110556791 | -    |
| 20260 | 1445670_at   | Strain | None          | None   | 4    | 115498181 | 115498443 | +    |
| 20261 | 1441362_at   | Strain | None          | None   | 14   | 10427614  | 10428551  | +    |
| 20262 | 1435119_at   | Strain | None          | None   | 3    | 87776444  | 87776731  | +    |
| 20263 | 1420535_a_at | Strain | 6330412F12Rik | 53312  | 5    | 23149873  | 23174275  | +    |
| 20264 | 1443529_at   | Strain | Rutbc2        | 52850  | 5    | 112319917 | 112387408 | -    |
| 20265 | 1434353_at   | Strain | Sfmbt2        | 353282 | 2    | 10510061  | 10511262  | +    |
| 20266 | 1457557_at   | Strain | A330076H08Rik | 320026 | NONE | NONE      | NONE      | NONE |
| 20267 | 1440571_at   | Strain | Eif4g3        | 230861 | 4    | 136874731 | 137087744 | +    |
| 20268 | 1426277_at   | Strain | C730025P13Rik | 227615 | 2    | 25187616  | 25188453  | +    |
| 20269 | 1455657_at   | Strain | 2610207I05Rik | 233789 | 7    | 112010248 | 112015656 | -    |
| 20270 | 1442654_at   | Strain | None          | None   | NONE | NONE      | NONE      | NONE |
| 20271 | 1438759_x_at | Strain | None          | None   | NONE | NONE      | NONE      | NONE |
| 20272 | 1441263_a_at | Strain | A930005H10Rik | 68161  | 3    | 114652097 | 114658964 | -    |
| 20273 | 1432827_x_at | Strain | Ubc           | 22190  | 11   | 124553698 | 124555581 | -    |
| 20274 | 1455744_at   | Strain | LOC547127     | 547127 |      | 81146073  | 81147601  | +    |
| 20275 | 1456837_at   | Strain | A830007L07Rik | 233879 | 7    | 120995718 | 120999313 | -    |
| 20276 | 1421179_at   | Strain | Ttyh2         | 117160 | 11   | 114496618 | 114540296 | +    |
| 20277 | 1420941_at   | Strain | Rgs5          | 19737  | 1    | 169589678 | 169627703 | +    |
|       |              |        | Ccm4l ///     |        |      |           |           |      |
|       |              |        | LOC433439 /// |        |      |           |           |      |
|       |              |        | LOC436521 /// |        |      |           |           |      |
|       |              |        | LOC545596 /// |        |      |           |           |      |
|       |              |        | LOC546093 /// |        |      |           |           |      |
| 20278 | 1436362_x_at | Strain | LOC547395     | 12457  | 3    | 50820528  | 50883543  | +    |
| 20279 | 1456080_a_at | Strain | Tde1          | 26943  | 2    | 163080242 | 163102100 | -    |
| 20280 | 1441339_at   | Strain | Chd9          | 109151 | 8    | 90115372  | 90161290  | +    |
| 20281 | 1445226_at   | Strain | BC023969      | 407828 | 15   | 33221551  | 33222192  | +    |
| 20282 | 1422510_at   | Strain | Ctdspl        | 69274  | 9    | 118920803 | 119038259 | +    |
| 20283 | 1442406_at   | Strain | 9230104K21Rik | 77688  | 4    | 45322134  | 45322841  | -    |
| 20284 | 1440078_at   | Strain | Brd4          | 57261  | 17   | 30005231  | 30094101  | -    |
| 20285 | 1440989_at   | Strain | None          | None   | 6    | 72144980  | 72145935  | -    |
| 20286 | 1417826_at   | Strain | Akr1e1        | 56043  | 13   | 4477155   | 4496595   | -    |
| 20287 | 1433899_x_at | Strain | Tgfb1i4       | 21807  | 14   | 70758316  | 70850256  | +    |
| 20288 | 1439631_at   | Strain | Zcchc11       | 230594 | 4    | 107418943 | 107518318 | +    |
| 20289 | 1456849_at   | Strain | Usp48         | 170707 | 4    | 136475016 | 136537437 | +    |
| 20290 | 1431300_at   | Strain | Sgip1         | 73094  | 4    | 101719268 | 101930082 | +    |
| 20291 | 1442824_at   | Strain | 8030497I03Rik | 399593 | 2    | 154269180 | 154269985 | +    |
| 20292 | 1435658_at   | Strain | Slc27a1       | 26457  | 8    | 70718241  | 70736379  | +    |

|       |              |        |               |        |      |           |           |      |
|-------|--------------|--------|---------------|--------|------|-----------|-----------|------|
| 20293 | 1443053_at   | Strain | None          | None   | 4    | 75496559  | 75497252  | -    |
| 20294 | 1447047_at   | Strain | 2610203C20Rik | 70455  | 9    | 41557881  | 41558415  | +    |
| 20295 | 1444195_at   | Strain | 1110007A06Rik | 68477  | 6    | 71723228  | 71772465  | -    |
| 20296 | 1449190_a_at | Strain | Entpd4        | 67464  | 14   | 63870758  | 63900260  | +    |
| 20297 | 1460045_at   | Strain | Cdh7          | 241201 | 1    | 109972834 | 110128098 | +    |
| 20298 | 1419115_at   | Strain | 5430428G01Rik | 66789  | 3    | 120073487 | 120141148 | +    |
| 20299 | 1458003_at   | Strain | Zfp398        | 272347 | 6    | 47960121  | 47992931  | +    |
| 20300 | 1416267_at   | Strain | Scoc          | 56367  | 8    | 82691600  | 82699587  | -    |
| 20301 | 1437297_at   | Strain | Chd8          | 67772  | 14   | 47298256  | 47322726  | -    |
| 20302 | 1422279_at   | Strain | Fv1           | 14349  | 4    | 146361272 | 146364396 | +    |
| 20303 | 1451799_at   | Strain | 2610528H13Rik | 67179  | 14   | 60364796  | 60394022  | +    |
| 20304 | 1443050_at   | Strain | BC032265      | 238024 | 11   | 121242520 | 121251857 | +    |
| 20305 | 1430593_at   | Strain | 1700041C02Rik | 73332  | 4    | 118281798 | 118374408 | -    |
| 20306 | 1415710_at   | Strain | BC038311      | 231430 | 5    | 89512113  | 89521416  | -    |
| 20307 | 1442124_at   | Strain | AI450326      | 100132 | 4    | 118178807 | 118179243 | -    |
| 20308 | 1457945_at   | Strain | Eif2s3y       | 26908  | Y    | 347054    | 365036    | +    |
| 20309 | 1449048_s_at | Strain | Rab4a         | 19341  | 8    | 123093097 | 123122359 | +    |
| 20310 | 1426439_at   | Strain | Ddx3y         | 26900  | Y    | 598006    | 622997    | -    |
| 20311 | 1428293_at   | Strain | 2310022M17Rik | 69556  | 11   | 31559934  | 31566451  | -    |
| 20312 | 1441238_at   | Strain | LOC545754     | 545754 | 5    | 64452218  | 64499685  | -    |
| 20313 | 1429763_at   | Strain | Cnih4         | 98417  | 1    | 181104746 | 181120255 | +    |
| 20314 | 1417227_at   | Strain | Mccc1         | 72039  | 3    | 35413327  | 35454130  | -    |
| 20315 | 1429220_at   | Strain | 2810443J12Rik | 67228  | 2    | 24894607  | 24905633  | +    |
| 20316 | 1445341_at   | Strain | None          | None   | 12   | 18741687  | 18742299  | +    |
| 20317 | 1430877_at   | Strain | 8030425K09Rik | 77207  | 7    | 90627151  | 90627890  | +    |
| 20318 | 1428588_a_at | Strain | 2810443J12Rik | 67228  | 2    | 24894607  | 24905633  | +    |
| 20319 | 1437901_a_at | Strain | Vps41         | 218035 | 13   | 18192301  | 18341778  | +    |
| 20320 | 1440830_at   | Strain | Gpr116        | 224792 | 17   | 40866790  | 40962389  | +    |
| 20321 | 1416495_s_at | Strain | Ndufs5        | 170658 | 4    | 122739822 | 122743439 | -    |
| 20322 | 1444738_at   | Strain | None          | None   | 6    | 143917748 | 143918451 | -    |
| 20323 | 1447754_x_at | Strain | Thap4         | 67026  | 1    | 93532881  | 93578284  | -    |
| 20324 | 1427229_at   | Strain | Hmgcr         | 15357  | 13   | 92840662  | 92862190  | -    |
| 20325 | 1443346_at   | Strain | 2700007P21Rik | 212772 | 2    | 106588216 | 106594178 | -    |
| 20326 | 1430047_at   | Strain | Brctd1        | 72573  | 13   | 73164743  | 73194647  | -    |
| 20327 | 1428760_at   | Strain | Snopc3        | 77634  | 4    | 82403941  | 82453789  | +    |
| 20328 | 1437923_at   | Strain | AI314760      | 106885 | 18   | 61812292  | 61815574  | +    |
| 20329 | 1441181_at   | Strain | Rora          | 19883  | 9    | 69474948  | 69510983  | +    |
| 20330 | 1443511_at   | Strain | Rora          | 19883  | 9    | 69474948  | 69510983  | +    |
| 20331 | 1426471_at   | Strain | Zfp52         | 22710  | 17   | 19404937  | 19434146  | +    |
| 20332 | 1428174_x_at | Strain | Khsrp         | 16549  | 17   | 54710978  | 54721434  | -    |
| 20333 | 1457231_at   | Strain | Hif1a         | 15251  | 12   | 70756396  | 70795257  | +    |
| 20334 | 1441050_at   | Strain | 5730526G10Rik | 70656  | 12   | 48407202  | 48407846  | -    |
| 20335 | 1438301_at   | Strain | Ddef1         | 13196  | 15   | 64104369  | 64365898  | -    |
| 20336 | 1442447_at   | Strain | BC025031      | 208987 | 11   | 5311578   | 5312772   | -    |
| 20337 | 1443212_at   | Strain | Large         | 16795  | 8    | 71965827  | 72364115  | -    |
| 20338 | 1426484_at   | Strain | Ubx2          | 67812  | 1    | 128087153 | 128120583 | +    |
| 20339 | 1428820_at   | Strain | Mapre1        | 13589  | 2    | 153198313 | 153225162 | +    |
| 20340 | 1456500_at   | Strain | Aph1b         | 208117 | 9    | 66900639  | 66920575  | -    |
| 20341 | 1437018_at   | Strain | Pnma2         | 239157 | 14   | 61446017  | 61450669  | +    |
| 20342 | 1417697_at   | Strain | Soat1         | 20652  | 1    | 156336595 | 156379733 | -    |
| 20343 | 1440455_at   | Strain | AI848599      | 100222 | 4    | 137340821 | 137341388 | +    |
| 20344 | 1460151_at   | Strain | None          | None   | NONE | NONE      | NONE      | NONE |
| 20345 | 1425191_at   | Strain | 9430098E02Rik | 77090  | 8    | 70521184  | 70522988  | +    |
| 20346 | 1439363_at   | Strain | 1200014J11Rik | 66874  | 11   | 72773538  | 72805874  | +    |
| 20347 | 1450288_at   | Strain | Cdh6          | 12563  | 15   | 12840386  | 12897433  | -    |
| 20348 | 1458186_at   | Strain | None          | None   | 4    | 107714022 | 107714454 | -    |
| 20349 | 1440464_at   | Strain | Elavl1        | 15568  | 8    | 3643294   | 3667872   | -    |
| 20350 | 1457762_at   | Strain | Ttc15         | 217449 | 12   | 25256255  | 25315622  | -    |
| 20351 | 1415903_at   | Strain | Slc38a1       | 105727 | 15   | 96641973  | 96691719  | -    |
| 20352 | 1454607_s_at | Strain | Psat1         | 107272 | 19   | 15129232  | 15149125  | -    |
| 20353 | 1416914_s_at | Strain | Mtvr2         | 17826  | 19   | 5516877   | 5518438   | -    |
| 20354 | 1437710_x_at | Strain | 1700021P22Rik | 75538  | 7    | 38571874  | 38576768  | +    |
| 20355 | 1441006_at   | Strain | Dus4l         | 71916  | 12   | 28214747  | 28229518  | -    |
| 20356 | 1416247_at   | Strain | Dctn3         | 53598  | 4    | 41853650  | 41862010  | -    |
| 20357 | 1452230_at   | Strain | None          | None   | 2    | 80013449  | 80051797  | +    |

|       |              |        |                                     |        |      |           |           |      |
|-------|--------------|--------|-------------------------------------|--------|------|-----------|-----------|------|
| 20358 | 1437579_at   | Strain | Nek2                                | 18005  | 1    | 191557109 | 191568589 | +    |
| 20359 | 1415685_at   | Strain | Mtif2                               | 76784  | 11   | 29421255  | 29440069  | +    |
| 20360 | 1456262_at   | Strain | Rbm5                                | 83486  | 9    | 107808484 | 107838963 | -    |
| 20361 | 1437878_s_at | Strain | D3Erd789e                           | 51938  | 3    | 33256108  | 33288047  | -    |
| 20362 | 1416403_at   | Strain | Abcb10                              | 56199  | 8    | 123239531 | 123269924 | -    |
| 20363 | 1457936_at   | Strain | Mapk8                               | 26419  | 14   | 31516453  | 31580724  | -    |
| 20364 | 1459698_at   | Strain | None                                | None   | 7    | 91379614  | 91380035  | +    |
| 20365 | 1458240_at   | Strain | Baiap1                              | 14924  | 6    | 94131999  | 94737301  | -    |
| 20366 | 1434548_at   | Strain | Tde1                                | 26943  | 2    | 163080242 | 163102100 | -    |
| 20367 | 1444772_at   | Strain | Smyd3                               | 69726  | 1    | 178910022 | 179472249 | -    |
| 20368 | 1453018_at   | Strain | Nvl                                 | 67459  | 1    | 181047238 | 181097972 | -    |
| 20369 | 1438177_x_at | Strain | Entpd4                              | 67464  | 14   | 63870758  | 63900260  | +    |
| 20370 | 1433895_at   | Strain | 2310003P10Rik                       | 69470  | 2    | 126761828 | 126774617 | +    |
| 20371 | 1442548_at   | Strain | Crim1                               | 50766  | 17   | 76155816  | 76156378  | +    |
| 20372 | 1420342_at   | Strain | Gdap10                              | 14546  | 12   | 29428074  | 29433121  | +    |
| 20373 | 1416090_at   | Strain | Pdhb                                | 68263  | 14   | 5833813   | 5841767   | -    |
| 20374 | 1455389_s_at | Strain | 2310051F07Rik                       | 108745 | 15   | 1069902   | 1071573   | +    |
| 20375 | 1442384_at   | Strain | None                                | None   |      | 70261410  | 70262475  | -    |
| 20376 | 1438363_at   | Strain | LOC434128                           | 434128 | 7    | 13895593  | 13898209  | +    |
| 20377 | 1432332_a_at | Strain | Nudt19                              | 110959 | 7    | 30711030  | 30719686  | -    |
| 20378 | 1420287_at   | Strain | None                                | None   | 8    | 83678088  | 83678241  | +    |
| 20379 | 1456056_a_at | Strain | D6Wsu116e                           | 28006  | 6    | 116645592 | 116700200 | +    |
| 20380 | 1439886_at   | Strain | None                                | None   | NONE | NONE      | NONE      | NONE |
| 20381 | 1425764_a_at | Strain | Bcat2                               | 12036  | 7    | 39652923  | 39672489  | +    |
| 20382 | 1421086_at   | Strain | Per3                                | 18628  | 4    | 149497074 | 149536951 | -    |
| 20383 | 1426229_s_at | Strain | Kras                                | 16653  | 6    | 146066254 | 146096662 | -    |
| 20384 | 1445725_at   | Strain | 4931417A20                          | 211936 | 2    | 104656658 | 104704491 | +    |
| 20385 | 1430196_at   | Strain | 8430408J09Rik                       | 66804  | 5    | 110159095 | 110160762 | +    |
| 20386 | 1448938_at   | Strain | Rpa3                                | 68240  | 6    | 8231143   | 8234319   | -    |
| 20387 | 1445032_at   | Strain | Dapk1                               | 69635  | 13   | 59260847  | 59420940  | +    |
| 20388 | 1418693_at   | Strain | Hnrpc ///<br>LOC329893<br>H2afz /// | 15381  | 14   | 47175503  | 47204310  | -    |
| 20389 | 1438092_x_at | Strain | LOC544879                           | 51788  | 3    | 136753528 | 136755851 | +    |
| 20390 | 1424893_at   | Strain | Ndel1                               | 83431  | 11   | 68547092  | 68578720  | -    |
| 20391 | 1452295_at   | Strain | Tmepai                              | 65112  | 2    | 172688256 | 172737000 | -    |
| 20392 | 1441716_at   | Strain | None                                | None   | 8    | 32199713  | 32200245  | +    |
| 20393 | 1429902_at   | Strain | 5830443J22Rik                       | 76056  | 9    | 72045348  | 72046508  | -    |
| 20394 | 1442680_at   | Strain | Ncam1                               | 17967  | 9    | 49555319  | 49607941  | -    |
| 20395 | 1429453_a_at | Strain | Mrpl55                              | 67212  | 11   | 58928146  | 58931631  | +    |
| 20396 | 1442408_at   | Strain | 2010305B15Rik                       | 72110  | 2    | 165529263 | 165530067 | -    |
| 20397 | 1434833_at   | Strain | Map4k2                              | 26412  | 19   | 6130040   | 6142317   | +    |
| 20398 | 1455600_at   | Strain | Rps3                                | 27050  | 7    | 93560951  | 93572082  | -    |
| 20399 | 1445263_at   | Strain | None                                | None   | NONE | NONE      | NONE      | NONE |
| 20400 | 1438575_a_at | Strain | 2900056M20Rik                       | 72997  | NONE | NONE      | NONE      | NONE |
| 20401 | 1430556_at   | Strain | Spag9                               | 70834  | 11   | 93817190  | 93944505  | +    |
| 20402 | 1431506_s_at | Strain | Ppih                                | 66101  | 4    | 118258916 | 118279389 | -    |
| 20403 | 1442624_at   | Strain | C920008N22Rik                       | 319366 | 7    | 91698072  | 91698421  | +    |
| 20404 | 1446730_at   | Strain | None                                | None   | 4    | 138458968 | 138459428 | +    |
| 20405 | 1416234_at   | Strain | AA959742                            | 98238  | 11   | 94450911  | 94466303  | +    |
| 20406 | 1421402_at   | Strain | Mta3                                | 116871 | 17   | 81539641  | 81648553  | +    |
| 20407 | 1425343_at   | Strain | Hdhd3                               | 72748  | 4    | 61590245  | 61593391  | -    |
| 20408 | 1442513_at   | Strain | None                                | None   | 13   | 3478100   | 3478978   | -    |
| 20409 | 1419506_at   | Strain | Ggps1                               | 14593  | 13   | 13494995  | 13505951  | -    |
| 20410 | 1426417_at   | Strain | Yipf4                               | 67864  | 17   | 72297116  | 72307880  | +    |
| 20411 | 1452686_s_at | Strain | D4Erd196e                           | 52174  | 4    | 132226946 | 132238686 | -    |
| 20412 | 1459827_x_at | Strain | Hps1                                | 192236 | 19   | 42299619  | 42323051  | -    |
| 20413 | 1451490_at   | Strain | Lyp1a1                              | 226791 | 1    | 185586332 | 185615762 | -    |
| 20414 | 1426896_at   | Strain | Zfp191                              | 59057  | 18   | 24240763  | 24249267  | -    |
| 20415 | 1438238_at   | Strain | 2010315B03Rik                       | 72071  |      | 43771107  | 43771677  | -    |
| 20416 | 1438155_x_at | Strain | Pigo                                | 56703  | 4    | 42933560  | 42941678  | -    |
| 20417 | 1429331_at   | Strain | 4632427E13Rik                       | 68186  | 7    | 86778897  | 86781465  | -    |
| 20418 | 1429846_at   | Strain | 9030411K21Rik                       | 71557  | 9    | 70690029  | 70691237  | +    |
| 20419 | 1423495_at   | Strain | Decr2                               | 26378  | 17   | 23874381  | 23883334  | -    |
| 20420 | 1452318_a_at | Strain | Hspa1b                              | 15511  | 17   | 32660211  | 32661550  | -    |

|       |              |        |               |        |    |           |           |   |
|-------|--------------|--------|---------------|--------|----|-----------|-----------|---|
| 20421 | 1423180_at   | Strain | Kcnb1         | 16500  | 2  | 166560111 | 166645532 | - |
| 20422 | 1446207_at   | Strain | None          | None   | 18 | 64510257  | 64510890  | + |
| 20423 | 1440862_at   | Strain | 5930418K15Rik | 77106  |    | 81150956  | 81151474  | - |
| 20424 | 1415748_a_at | Strain | Dctn5         | 59288  | 7  | 116010930 | 116026902 | + |
| 20425 | 1431406_at   | Strain | Agxt2l1       | 71760  | 3  | 129547666 | 129565839 | + |
| 20426 | 1416665_at   | Strain | Coq7          | 12850  | 7  | 112400919 | 112409170 | - |
| 20427 | 1452265_at   | Strain | Clasp1        | 76707  | 1  | 118312452 | 118360897 | + |
| 20428 | 1418386_at   | Strain | 2510005D08Rik | 68043  | 14 | 52081084  | 52106667  | - |
| 20429 | 1452187_at   | Strain | Rbm5          | 83486  | 9  | 107808484 | 107838963 | - |
| 20430 | 1444535_at   | Strain | Brd4          | 57261  | 17 | 30005231  | 30094101  | - |
| 20431 | 1423626_at   | Strain | Dst           | 13518  | 1  | 34280938  | 34577763  | + |
| 20432 | 1452690_at   | Strain | Khsrp         | 16549  | 17 | 54710978  | 54721434  | - |
| 20433 | 1427820_at   | Strain | None          | None   |    | 23266426  | 23267697  | + |
| 20434 | 1438862_at   | Strain | A630005I04Rik | 320743 | 7  | 107093589 | 107097051 | + |
| 20435 | 1434541_x_at | Strain | None          | None   | 4  | 128741974 | 128742810 | - |
| 20436 | 1440139_at   | Strain | None          | None   | 18 | 65170467  | 65170733  | + |
| 20437 | 1434721_at   | Strain | D5Erd585e     | 71782  | 5  | 109281825 | 109307432 | + |
| 20438 | 1419179_at   | Strain | Txn14         | 27366  | 18 | 80330360  | 80347046  | + |
| 20439 | 1456955_at   | Strain | 5830417C01Rik | 78825  | 1  | 178140297 | 178205198 | + |
| 20440 | 1416499_a_at | Strain | Dctn6         | 22428  | 8  | 32891565  | 32909677  | - |
| 20441 | 1440416_at   | Strain | Usp46         | 69727  | 5  | 72834085  | 72900782  | - |
| 20442 | 1448406_at   | Strain | Cri1          | 58521  | 2  | 125186948 | 125188636 | + |
| 20443 | 1455452_x_at | Strain | Al449310      | 101584 | 7  | 91504850  | 91505827  | + |
| 20444 | 1439272_at   | Strain | A830039H10Rik | 209707 | 5  | 44458346  | 44613918  | - |
| 20445 | 1446772_at   | Strain | None          | None   | 15 | 32252017  | 32252626  | + |
| 20446 | 1438891_at   | Strain | Catnd2        | 18163  | 15 | 30163743  | 31021141  | + |
| 20447 | 1432003_a_at | Strain | Rnf41         | 67588  | 10 | 128148476 | 128178259 | + |
| 20448 | 1459376_at   | Strain | None          | None   | 10 | 14005933  | 14006582  | + |
| 20449 | 1448367_at   | Strain | Sdf4          | 20318  | 4  | 154485276 | 154505972 | + |
| 20450 | 1446104_at   | Strain | None          | None   | 6  | 113473785 | 113474399 | - |
| 20451 | 1454684_at   | Strain | Bbs7          | 71492  | 3  | 36036749  | 36076979  | - |
| 20452 | 1460025_at   | Strain | Lrig2         | 269473 | 3  | 103884911 | 103892007 | - |
| 20453 | 1442837_at   | Strain | None          | None   | 4  | 75448689  | 75449905  | - |
| 20454 | 1428343_at   | Strain | Rcor3         | 214742 | 1  | 191839449 | 191876966 | - |
| 20455 | 1431382_a_at | Strain | Rsnl2         | 78785  | 17 | 69558453  | 69633262  | + |
| 20456 | 1449401_at   | Strain | C1qg          | 12262  | 4  | 135771067 | 135774130 | - |
| 20457 | 1444517_at   | Strain | Gm872         | 380653 | 10 | 92744601  | 92861446  | - |
| 20458 | 1437481_at   | Strain | Spdy1         | 70891  | 17 | 69327615  | 69364244  | + |
| 20459 | 1436222_at   | Strain | Gas5          | 14455  | 1  | 160940158 | 160942671 | + |
| 20460 | 1449635_at   | Strain | Prp19         | 28000  | 19 | 10091789  | 10102029  | + |
| 20461 | 1442400_at   | Strain | ---           | 432977 | 15 | 93660269  | 93661107  | - |
| 20462 | 1439929_at   | Strain | Mfhas1        | 52065  | 8  | 34390870  | 34482521  | + |
| 20463 | 1443109_at   | Strain | 5830417C01Rik | 78825  | 1  | 178140297 | 178205198 | + |
| 20464 | 1427580_a_at | Strain | Rian          | 75745  | 12 | 105123125 | 105129266 | + |
| 20465 | 1434493_at   | Strain | 1810022K09Rik | 69126  | 3  | 14603141  | 14606511  | - |
| 20466 | 1441375_at   | Strain | Lrig1         | 16206  | 6  | 95066417  | 95161798  | - |
| 20467 | 1439197_at   | Strain | Pik4cb        | 107650 | 3  | 94462567  | 94494420  | + |
| 20468 | 1442365_at   | Strain | Rtn3          | 20168  | 19 | 7139746   | 7197134   | - |
| 20469 | 1457970_at   | Strain | Actr1a        | 54130  | 19 | 45924156  | 45943077  | - |
| 20470 | 1448801_a_at | Strain | Timm44        | 21856  | 8  | 3614696   | 3630853   | - |
| 20471 | 1451187_at   | Strain | 0610037P05Rik | 66086  | 16 | 13035040  | 13053128  | - |
| 20472 | 1417466_at   | Strain | None          | None   | 1  | 169628085 | 169629980 | + |
| 20473 | 1453755_at   | Strain | Lsm11         | 72290  | 11 | 45683917  | 45697772  | - |
| 20474 | 1439546_at   | Strain | 4933417O08Rik | 71146  | 19 | 41800115  | 41814754  | + |
| 20475 | 1423170_at   | Strain | Taf7          | 24074  | 18 | 37864624  | 37867888  | - |
| 20476 | 1438526_at   | Strain | Gpr158        | 241263 | 2  | 21409577  | 21872554  | + |
| 20477 | 1422126_a_at | Strain | Nudt13        | 67725  | 14 | 18656034  | 18678071  | + |
| 20478 | 1444037_at   | Strain | Lman1         | 70361  | 18 | 66213875  | 66235740  | - |
| 20479 | 1423457_at   | Strain | Slc35a5       | 74102  | 16 | 44022615  | 44041681  | - |
| 20480 | 1424717_at   | Strain | Mis12         | 67139  | 11 | 70745269  | 70752792  | + |
| 20481 | 1455862_at   | Strain | 9630054F20Rik | 327900 | 11 | 32350166  | 32413503  | + |
| 20482 | 1434816_at   | Strain | Vps33a        | 77573  | 5  | 122700612 | 122742738 | - |
| 20483 | 1418203_at   | Strain | Pmaip1        | 58801  | 18 | 66687938  | 66694892  | + |
| 20484 | 1424628_a_at | Strain | 1500032D16Rik | 78330  | 17 | 29329211  | 29340379  | + |
| 20485 | 1424730_a_at | Strain | Slc15a2       | 57738  | 16 | 35567606  | 35602387  | - |

|       |              |        |               |        |      |           |           |      |
|-------|--------------|--------|---------------|--------|------|-----------|-----------|------|
| 20486 | 1431725_at   | Strain | Fmn2          | 54418  | 1    | 174435022 | 174755223 | +    |
| 20487 | 1429963_at   | Strain | 2610021I23Rik | 70413  | 9    | 75545906  | 75547570  | -    |
| 20488 | 1457465_at   | Strain | D430043L16Rik | 208431 | X    | 4887205   | 4947347   | +    |
| 20489 | 1440046_at   | Strain | BC031748      | 245622 | X    | 130594568 | 130622430 | +    |
| 20490 | 1423487_at   | Strain | 1200020A08Rik | 56724  | 17   | 84882400  | 84892614  | +    |
| 20491 | 1440871_at   | Strain | Magj1         | 14924  | 6    | 94131999  | 94737301  | -    |
| 20492 | 1452508_x_at | Strain | 2610009E16Rik | 69202  | NONE | NONE      | NONE      | NONE |
| 20493 | 1418667_at   | Strain | 2410002O22Rik | 66975  | 13   | 100361503 | 100396609 | -    |
| 20494 | 1440475_at   | Strain | AW011738      | 100382 | NONE | NONE      | NONE      | NONE |
| 20495 | 1416632_at   | Strain | Mod1          | 17436  | 9    | 86923622  | 87038833  | -    |
| 20496 | 1455965_at   | Strain | None          | None   | 1    | 171188791 | 171189477 | +    |
| 20497 | 1427126_at   | Strain | Hspa1b        | 15511  | 17   | 32660211  | 32661550  | -    |
| 20498 | 1449716_s_at | Strain | Nrd1          | 230598 | 4    | 107959710 | 108020676 | +    |
| 20499 | 1431241_at   | Strain | Chchd3        | 66075  | 6    | 32872201  | 33140615  | -    |
| 20500 | 1416865_at   | Strain | Fgd1          | 14163  | X    | 144581628 | 144623494 | +    |
| 20501 | 1442956_at   | Strain | Ppp1r13b      | 21981  | 12   | 107308924 | 107388462 | -    |
| 20502 | 1459224_at   | Strain | None          | None   | 12   | 107367073 | 107367440 | -    |
| 20503 | 1456923_at   | Strain | Trpm3         | 226025 | 19   | 21686135  | 22227805  | +    |
| 20504 | 1429968_at   | Strain | 2310047L11Rik | 70280  | 12   | 68925069  | 68926413  | +    |
| 20505 | 1424508_at   | Strain | Ttc5          | 219022 | 14   | 45870095  | 45880135  | -    |
| 20506 | 1450848_at   | Strain | Dap3          | 65111  | 3    | 88667305  | 88694146  | -    |
| 20507 | 1423842_a_at | Strain | Rnf41         | 67588  | 10   | 128148476 | 128178259 | +    |
| 20508 | 1429257_at   | Strain | Gtl2          | 17263  | 12   | 105023823 | 105039917 | +    |
| 20509 | 1457969_at   | Strain | Rabif         | 98710  | 1    | 134344923 | 134358148 | +    |
| 20510 | 1442402_at   | Strain | Sh3md2        | 59009  | 8    | 60271818  | 60461252  | +    |
| 20511 | 1424749_at   | Strain | Wdfy1         | 69368  | 1    | 80056762  | 80093054  | -    |
| 20512 | 1439312_at   | Strain | None          | None   | 6    | 106160316 | 106160743 | -    |
| 20513 | 1451301_at   | Strain | Tmod2         | 50876  | 9    | 75710299  | 75748747  | -    |
| 20514 | 1458989_at   | Strain | Limk1         | 16885  | 5    | 133669544 | 133702806 | -    |
| 20515 | 1446140_at   | Strain | Pcm1          | 18536  | 8    | 40177407  | 40269978  | +    |
| 20516 | 1458994_at   | Strain | Csnk1g3       | 70425  | 18   | 54125626  | 54174530  | +    |
| 20517 | 1449113_at   | Strain | 5330440M15Rik | 77110  | 4    | 115516632 | 115552787 | +    |
| 20518 | 1434643_at   | Strain | Tbl1x         | 21372  | X    | 72294199  | 72320920  | +    |
| 20519 | 1454712_at   | Strain | Mcart1        | 230125 | 4    | 45311988  | 45320724  | -    |
| 20520 | 1440444_at   | Strain | Fads1         | 76267  | 19   | 9379470   | 9393371   | +    |
| 20521 | 1457262_at   | Strain | 2610207I05Rik | 233789 | 15   | 9030885   | 9032009   | +    |
| 20522 | 1428004_at   | Strain | 3300001G02Rik | 78372  | 11   | 32100209  | 32103778  | +    |
| 20523 | 1450924_at   | Strain | Hdgfrp3       | 29877  | 7    | 75691975  | 75742185  | -    |
| 20524 | 1431233_at   | Strain | Cnnm4         | 94220  | 1    | 36766575  | 36801553  | +    |
| 20525 | 1458903_at   | Strain | A230057G18Rik | 330166 | 5    | 111288191 | 111298937 | -    |
| 20526 | 1417327_at   | Strain | Cav2          | 12390  | 6    | 17264785  | 17272455  | +    |
| 20527 | 1449490_at   | Strain | Mbd4          | 17193  | 6    | 116279963 | 116291256 | -    |
| 20528 | 1455574_at   | Strain | 9430023P16Rik | 226517 | 1    | 152721479 | 152787106 | -    |
| 20529 | 1451022_at   | Strain | Lrp6          | 16974  | 6    | 135206976 | 135323616 | -    |
| 20530 | 1424668_a_at | Strain | Cutl1         | 13047  | 5    | 135261627 | 135499343 | -    |
| 20531 | 1432052_at   | Strain | Exosc1        | 66583  | 19   | 41468091  | 41477666  | -    |
| 20532 | 1442725_at   | Strain | Al663975      | 103819 | 11   | 110336741 | 110337194 | +    |
| 20533 | 1440125_at   | Strain | None          | None   | 13   | 64219825  | 64220090  | -    |
| 20534 | 1438041_at   | Strain | Pde7a         | 18583  | 3    | 18563269  | 18602308  | -    |
| 20535 | 1452192_at   | Strain | BC053440      | 234344 | 8    | 65955121  | 65999681  | +    |
| 20536 | 1445387_at   | Strain | Senp6         | 215351 | 9    | 80272603  | 80350480  | +    |
| 20537 | 1445540_at   | Strain | Dnm3          | 103967 | 1    | 161896669 | 162387092 | -    |
| 20538 | 1435491_at   | Strain | Al875089      | 102177 | NONE | NONE      | NONE      | NONE |
| 20539 | 1459464_at   | Strain | Macf1         | 11426  | 4    | 122378001 | 122711301 | -    |
| 20540 | 1441502_at   | Strain | Lrfn5         | 238205 | 12   | 58254745  | 58585291  | +    |
| 20541 | 1453068_at   | Strain | Prdm2         | 110593 | 4    | 142024189 | 142128244 | -    |
| 20542 | 1426293_at   | Strain | 6330581L23Rik | 233056 | 7    | 25230836  | 25245657  | +    |
| 20543 | 1424101_at   | Strain | Hnrpl         | 15388  | 7    | 24216779  | 24228110  | +    |
| 20544 | 1456634_at   | Strain | 9830001H06Rik | 320706 | 2    | 156472766 | 156544977 | -    |
| 20545 | 1426125_a_at | Strain | Casp9         | 12371  | 4    | 140674873 | 140697236 | +    |
| 20546 | 1443262_at   | Strain | Mrps14        | 64659  | 1    | 160099907 | 160105833 | +    |
| 20547 | 1457180_at   | Strain | 2900024P20Rik | 208440 | 13   | 9260573   | 9652519   | +    |
| 20548 | 1428137_at   | Strain | Arl10c        | 67166  | 6    | 109286299 | 109326908 | +    |
| 20549 | 1455237_at   | Strain | Usp36         | 72344  | 11   | 118078029 | 118111324 | -    |
| 20550 | 1441858_at   | Strain | None          | None   | NONE | NONE      | NONE      | NONE |

|       |              |        |                   |        |      |           |           |      |
|-------|--------------|--------|-------------------|--------|------|-----------|-----------|------|
| 20551 | 1438043_at   | Strain | Hmg20a            | 66867  | 9    | 56527993  | 56606058  | +    |
| 20552 | 1444218_at   | Strain | D19Erdt737e       | 76539  | 19   | 59801013  | 59829124  | -    |
| 20553 | 1446284_at   | Strain | Mtss1             | 211401 | 15   | 58954404  | 59092928  | -    |
| 20554 | 1418898_at   | Strain | Lin7c             | 22343  | 2    | 109514665 | 109524724 | +    |
| 20555 | 1452012_a_at | Strain | Exosc1            | 66583  | 19   | 41468091  | 41477666  | -    |
| 20556 | 1456351_at   | Strain | Brd8              | 78656  | 18   | 34822848  | 34847583  | -    |
| 20557 | 1445020_at   | Strain | None              | None   | 11   | 29890094  | 29890949  | -    |
| 20558 | 1429627_at   | Strain | Ppil3             | 70225  | 1    | 58735867  | 58750356  | -    |
| 20559 | 1455213_at   | Strain | 4930488E11Rik     | 399591 | X    | 130500205 | 130502929 | -    |
| 20560 | 1457754_at   | Strain | 4930430F08Rik     | 68281  | 10   | 100478624 | 100495565 | -    |
| 20561 | 1454659_at   | Strain | Dctd              | 320685 | 8    | 47080095  | 47111758  | +    |
| 20562 | 1418535_at   | Strain | Rgl1              | 19731  | 1    | 152402014 | 152509595 | -    |
| 20563 | 1452664_a_at | Strain | Tm7sf3            | 67623  | 6    | 147522941 | 147555233 | -    |
| 20564 | 1436790_a_at | Strain | Sox11             | 20666  | 12   | 23892134  | 23893641  | -    |
| 20565 | 1419741_at   | Strain | Supt16h           | 114741 | 14   | 47260522  | 47297306  | -    |
| 20566 | 1426906_at   | Strain | LOC545386         | 545386 | 1    | 173789631 | 173812568 | -    |
| 20567 | 1439200_x_at | Strain | Erdr1             | 170942 | NONE | NONE      | NONE      | NONE |
| 20568 | 1429116_at   | Strain | Slc17a5           | 235504 | 9    | 78736237  | 78788257  | -    |
| 20569 | 1417208_at   | Strain | Amacr             | 17117  | 15   | 10790819  | 10805687  | +    |
| 20570 | 1454402_at   | Strain | 3110048L19Rik     | 73233  | 17   | 19799824  | 19802130  | -    |
| 20571 | 1420942_s_at | Strain | None              | None   | 1    | 169589681 | 169628824 | +    |
| 20572 | 1452791_at   | Strain | Coq2              | 71883  | 6    | 137247204 | 137248859 | -    |
| 20573 | 1435902_at   | Strain | Nudt18            | 213484 | 14   | 64894081  | 64896270  | +    |
|       |              |        | Gcn111 ///        |        |      |           |           |      |
| 20574 | 1433713_at   | Strain | LOC545697         | 231659 | 5    | 114676923 | 114736096 | +    |
| 20575 | 1453994_at   | Strain | C230094A16Rik     | 237711 | 11   | 29638924  | 29659023  | -    |
| 20576 | 1435935_at   | Strain | None              | None   | 5    | 117394280 | 117395037 | +    |
| 20577 | 1420494_x_at | Strain | Ubc               | 22190  | 11   | 124553698 | 124555581 | -    |
| 20578 | 1418429_at   | Strain | Kif5b             | 16573  | 18   | 6245790   | 6284051   | -    |
| 20579 | 1438824_at   | Strain | Slc20a1           | 20515  | 2    | 128712653 | 128725462 | +    |
| 20580 | 1436535_at   | Strain | Ssa2              | 20822  | 1    | 143587635 | 143609041 | -    |
| 20581 | 1423847_at   | Strain | 2810406C15Rik     | 68298  | 6    | 125824301 | 125848264 | -    |
| 20582 | 1445902_at   | Strain | None              | None   | 11   | 105709036 | 105709927 | +    |
| 20583 | 1418431_at   | Strain | Kif5b             | 16573  | 18   | 6245790   | 6284051   | -    |
| 20584 | 1441331_at   | Strain | A230061C15Rik     | 320855 | 10   | 13880001  | 13881139  | +    |
| 20585 | 1439517_at   | Strain | C130067A03Rik     | 320713 | 4    | 93917113  | 93954172  | -    |
| 20586 | 1433998_at   | Strain | 4933427D14Rik     | 74477  | 11   | 71879755  | 71929029  | -    |
| 20587 | 1449813_at   | Strain | Zfp30             | 22693  | 7    | 25199507  | 25209257  | +    |
| 20588 | 1452110_at   | Strain | Mtrr              | 210009 | 13   | 64582734  | 64602904  | -    |
| 20589 | 1437680_x_at | Strain | Glrx2             | 69367  | 1    | 143571711 | 143578676 | +    |
| 20590 | 1451731_at   | Strain | Abca3             | 27410  | 17   | 22155713  | 22213193  | +    |
| 20591 | 1455496_at   | Strain | Pfas              | 237823 | 11   | 68711358  | 68729532  | -    |
| 20592 | 1431473_at   | Strain | 5330423I11Rik     | 78268  | 9    | 34665971  | 34667890  | +    |
| 20593 | 1446529_at   | Strain | AI449175          | 234362 | 8    | 68761621  | 68776282  | -    |
| 20594 | 1417105_at   | Strain | 1810017G16Rik     | 59005  | 8    | 121993095 | 121997038 | +    |
| 20595 | 1424860_at   | Strain | D930016D06Rik     | 100662 | 5    | 103588142 | 103590334 | +    |
| 20596 | 1429247_at   | Strain | Anxa6             | 11749  | 11   | 54731952  | 54786255  | -    |
| 20597 | 1449072_a_at | Strain | 2510005D08Rik     | 68043  | 14   | 52081084  | 52106667  | -    |
| 20598 | 1448819_at   | Strain | Eif2s2            | 67204  | 2    | 154328353 | 154349719 | -    |
| 20599 | 1428013_at   | Strain | 6030458C11Rik     | 77877  | 15   | 12615740  | 12631966  | -    |
| 20600 | 1417266_at   | Strain | Ccl6              | 20305  | 11   | 83315881  | 83320979  | -    |
| 20601 | 1453321_at   | Strain | Fndc1             | 68655  | 17   | 333       | 29629     | +    |
| 20602 | 1453123_at   | Strain | Sf3b2             | 319322 | 19   | 5062722   | 5084238   | -    |
| 20603 | 1456238_at   | Strain | Zfp133            | 171588 | 2    | 143924439 | 143924731 | +    |
| 20604 | 1416443_a_at | Strain | Uble1a            | 56459  | 7    | 13308414  | 13337163  | -    |
|       |              |        | 3110007F17Rik /// |        |      |           |           |      |
|       |              |        | LOC382265 ///     |        |      |           |           |      |
| 20605 | 1439279_at   | Strain | LOC546367         | 382265 | X    | 118148022 | 118182394 | +    |
| 20606 | 1432601_at   | Strain | MIl5              | 69188  | 5    | 21957157  | 21958405  | +    |
| 20607 | 1420613_at   | Strain | Ptp4a2            | 19244  | 4    | 128866586 | 128877088 | +    |
| 20608 | 1427127_x_at | Strain | Hspa1b            | 15511  | 17   | 32660211  | 32661550  | -    |
| 20609 | 1429847_a_at | Strain | 4833418A01Rik     | 75763  | 2    | 70753595  | 70786387  | +    |
| 20610 | 1445928_at   | Strain | 38417             | 223455 | 15   | 31457571  | 31531643  | -    |
| 20611 | 1431423_a_at | Strain | Med8              | 80509  | 4    | 117368260 | 117374016 | +    |
| 20612 | 1426611_at   | Strain | Psmc2             | 19181  | 5    | 20237647  | 20256148  | +    |

|       |              |        |                     |        |      |           |           |      |
|-------|--------------|--------|---------------------|--------|------|-----------|-----------|------|
| 20613 | 1428858_at   | Strain | Wdr70               | 73770  | 8    | 108586498 | 108639211 | -    |
| 20614 | 1435588_at   | Strain | Wdfy1               | 69368  | 1    | 80056762  | 80093054  | -    |
| 20615 | 1430000_at   | Strain | B230117O15Rik       | 78871  | 4    | 3482316   | 3483437   | -    |
| 20616 | 1423314_s_at | Strain | Pde7a               | 18583  | 3    | 18563269  | 18602308  | -    |
| 20617 | 1460705_at   | Strain | Rps6kb1             | 72508  | 11   | 86241975  | 86272766  | -    |
| 20618 | 1444401_at   | Strain | C80913              | 19777  | 7    | 33124913  | 33183548  | -    |
| 20619 | 1433860_at   | Strain | 6030458C11Rik       | 77877  | 15   | 12615740  | 12631966  | -    |
| 20620 | 1452994_at   | Strain | Pip5k3              | 18711  | 1    | 65480863  | 65568017  | +    |
| 20621 | 1432443_at   | Strain | 1700021P22Rik       | 75538  | 7    | 38571874  | 38576768  | +    |
| 20622 | 1438718_at   | Strain | Fgf9                | 14180  | 14   | 52607790  | 52644523  | +    |
| 20623 | 1417825_at   | Strain | Esd                 | 13885  | 14   | 69077924  | 69096025  | +    |
| 20624 | 1452231_x_at | Strain | LOC545386           | 545386 | 1    | 173789631 | 173812568 | -    |
| 20625 | 1446904_at   | Strain | Arhgef11            | 213498 | 3    | 87428572  | 87483137  | +    |
| 20626 | 1437858_at   | Strain | 9330164H19Rik       | 233115 | 7    | 30851673  | 30917234  | -    |
| 20627 | 1437404_at   | Strain | Mast4               | 328329 | 13   | 98930827  | 99546711  | -    |
| 20628 | 1416174_at   | Strain | Rbbp9               | 26450  | 2    | 144000757 | 144007714 | -    |
| 20629 | 1438353_at   | Strain | None                | None   | 9    | 70686640  | 70687047  | +    |
| 20630 | 1457257_x_at | Strain | None                | None   | 16   | 45273705  | 45273960  | -    |
| 20631 | 1447341_at   | Strain | D12ErtD551e         | 52635  | 12   | 112138486 | 112138920 | +    |
| 20632 | 1433050_at   | Strain | 5730478J17Rik       | 70580  | 18   | 72390116  | 72390848  | -    |
| 20633 | 1435865_at   | Strain | Trim17 /// Hist3h2a | 319162 | 11   | 58680314  | 58682303  | +    |
| 20634 | 1422810_at   | Strain | Zfp191              | 59057  | 18   | 24240763  | 24249267  | -    |
| 20635 | 1442182_at   | Strain | 1810055D05Rik       | 67713  | 3    | 33524817  | 33528645  | -    |
| 20636 | 1455959_s_at | Strain | Gclc                | 14629  | 9    | 77899181  | 77938127  | +    |
| 20637 | 1430096_at   | Strain | 2900017F05Rik       | 72915  | 19   | 22014742  | 22016249  | +    |
| 20638 | 1459710_at   | Strain | 1700001K19Rik       | 66323  | 12   | 106142923 | 106157841 | -    |
| 20639 | 1418764_a_at | Strain | Bpnt1               | 23827  | 1    | 184830611 | 184856221 | +    |
| 20640 | 1438466_at   | Strain | Gm107               | 227058 | 1    | 46635424  | 46672653  | +    |
| 20641 | 1454040_at   | Strain | 5730591J02Rik       | 77581  | 4    | 9697553   | 9707582   | +    |
| 20642 | 1443564_at   | Strain | None                | None   | 13   | 63826369  | 63826737  | -    |
| 20643 | 1435559_at   | Strain | Myo6                | 17920  | 9    | 80370873  | 80516811  | +    |
| 20644 | 1448437_a_at | Strain | Gtpbp2              | 56055  | 17   | 43670992  | 43679289  | +    |
| 20645 | 1452709_at   | Strain | Poldip3             | 73826  | 15   | 83176653  | 83200011  | -    |
| 20646 | 1419660_at   | Strain | 1600012F09Rik       | 67008  | 13   | 17452501  | 17457637  | -    |
| 20647 | 1428539_at   | Strain | 2610207I05Rik       | 233789 | 15   | 9031897   | 9034573   | +    |
| 20648 | 1421000_at   | Strain | Cnot4               | 53621  | 6    | 35139222  | 35227761  | -    |
| 20649 | 1428297_at   | Strain | Map4k2              | 26412  | 19   | 6130040   | 6142317   | +    |
| 20650 | 1439917_at   | Strain | Pdzk8               | 107368 | 19   | 58892773  | 58893596  | -    |
| 20651 | 1419668_at   | Strain | Sgcb                | 24051  | 5    | 72423553  | 72437683  | -    |
| 20652 | 1454902_at   | Strain | Prkcz               | 18762  | 4    | 153754439 | 153853605 | -    |
| 20653 | 1427297_at   | Strain | Mrpl9               | 78523  | 3    | 93931159  | 93936531  | +    |
| 20654 | 1446324_at   | Strain | None                | None   | 5    | 13291160  | 13291820  | -    |
| 20655 | 1435984_at   | Strain | 1110033F14Rik       | 68699  | 17   | 21083663  | 21084304  | -    |
| 20656 | 1459105_at   | Strain | None                | None   | 11   | 69772201  | 69773156  | +    |
| 20657 | 1438703_at   | Strain | Ankrd26             | 232339 | 6    | 118934772 | 118994843 | -    |
| 20658 | 1429258_at   | Strain | 1110025D03Rik       | 68620  | 7    | 39718715  | 39721902  | -    |
| 20659 | 1460102_at   | Strain | Clasp1              | 76707  | 1    | 118258317 | 118258939 | +    |
| 20660 | 1443057_at   | Strain | ---                 | 432669 | 12   | 66451383  | 66452077  | -    |
| 20661 | 1456707_at   | Strain | None                | None   | 7    | 4295947   | 4306022   | -    |
| 20662 | 1445824_at   | Strain | Zfp458              | 238690 | 13   | 63854473  | 63868626  | -    |
| 20663 | 1419363_a_at | Strain | Mrpl35              | 66223  | 6    | 72147085  | 72155754  | -    |
| 20664 | 1420549_at   | Strain | Gbp1                | 14468  | 3    | 141567114 | 141588140 | +    |
| 20665 | 1438511_a_at | Strain | 1190002H23Rik       | 66214  | 14   | 73642798  | 73655682  | -    |
| 20666 | 1459617_at   | Strain | Mapk14              | 26416  | 17   | 26492551  | 26549631  | +    |
| 20667 | 1440637_at   | Strain | Itns1               | 16443  | 16   | 90939437  | 91069253  | +    |
| 20668 | 1447864_s_at | Strain | Pogk                | 71592  | 1    | 166319364 | 166331981 | -    |
| 20669 | 1452406_x_at | Strain | MGI:2384747         | 170942 | NONE | NONE      | NONE      | NONE |
| 20670 | 1437666_x_at | Strain | Ubc                 | 22190  | 11   | 124553698 | 124555581 | -    |
| 20671 | 1426704_at   | Strain | Gak                 | 231580 | 5    | 107645627 | 107705954 | -    |
| 20672 | 1435270_x_at | Strain | 2510005D08Rik       | 68043  | 14   | 52081084  | 52106667  | -    |
| 20673 | 1451343_at   | Strain | 2210415M20Rik       | 70160  | 8    | 20945031  | 20970768  | +    |
| 20674 | 1431993_a_at | Strain | Rnf38               | 73469  | 4    | 44044581  | 44074976  | -    |
| 20675 | 1459917_at   | Strain | AI451896            | 103736 | 11   | 84596860  | 84597291  | -    |
| 20676 | 1457503_at   | Strain | 2310035C23Rik       | 227446 | 1    | 105555177 | 105695178 | +    |

|       |              |        |                   |        |      |           |           |      |
|-------|--------------|--------|-------------------|--------|------|-----------|-----------|------|
| 20677 | 1420052_x_at | Strain | Psmb1             | 19170  | 17   | 13479611  | 13501932  | -    |
| 20678 | 1446558_at   | Strain | F730015K02Rik     | 319526 | 9    | 64933661  | 64966353  | +    |
| 20679 | 1427076_at   | Strain | Mpeg1             | 17476  | 19   | 11657132  | 11661361  | +    |
| 20680 | 1438285_at   | Strain | 2210015D19Rik     | 76508  | 11   | 5656916   | 5679497   | +    |
| 20681 | 1444575_at   | Strain | 1500002O20Rik     | 71997  | 7    | 19575337  | 19598486  | +    |
| 20682 | 1424415_s_at | Strain | Spon1             | 233744 | 7    | 107618725 | 107894210 | +    |
| 20683 | 1451050_at   | Strain | Nt5c3             | 107569 | 6    | 57026464  | 57068191  | -    |
| 20684 | 1424554_at   | Strain | Ppp1r8            | 100336 | 4    | 131787828 | 131804018 | -    |
| 20685 | 1452805_at   | Strain | D11Wsu47e         | 276852 | 11   | 113505503 | 113515740 | +    |
| 20686 | 1422892_s_at | Strain | H2-Ea             | 14968  | 17   | 32042836  | 32045269  | -    |
| 20687 | 1454905_at   | Strain | Ibtk              | 108837 | 9    | 86018193  | 86080240  | -    |
| 20688 | 1435682_at   | Strain | Lars2             | 102436 | 9    | 123390644 | 123486368 | +    |
| 20689 | 1420935_a_at | Strain | Srrm1             | 51796  | 4    | 134203290 | 134234393 | -    |
| 20690 | 1455164_at   | Strain | Cdgap             | 12549  | 16   | 37420388  | 37534097  | -    |
| 20691 | 1444878_at   | Strain | Dock10            | 210293 | 1    | 80833085  | 80997044  | -    |
| 20692 | 1460084_at   | Strain | None              | None   | NONE | NONE      | NONE      | NONE |
| 20693 | 1422882_at   | Strain | Sypl              | 19027  | 12   | 29560169  | 29583105  | +    |
| 20694 | 1434659_at   | Strain | 5830411G16Rik     | 78937  | 6    | 56859230  | 56906236  | +    |
| 20695 | 1454836_at   | Strain | Tmem18            | 211986 | 12   | 27161018  | 27171249  | +    |
| 20696 | 1456093_at   | Strain | Zfp536            | 243937 | 7    | 32643367  | 32934010  | -    |
| 20697 | 1448885_at   | Strain | Rap2b             | 74012  | 3    | 61043051  | 61046895  | +    |
| 20698 | 1419716_a_at | Strain | Pou2f1            | 18986  | 1    | 165797249 | 165856725 | -    |
| 20699 | 1456408_x_at | Strain | 4933439C10Rik     | 74476  | 11   | 59235162  | 59235785  | +    |
| 20700 | 1441669_at   | Strain | Centb2            | 78618  | NONE | NONE      | NONE      | NONE |
| 20701 | 1441108_at   | Strain | None              | None   | NONE | NONE      | NONE      | NONE |
| 20702 | 1446595_at   | Strain | Sh3d1B            | 20403  | 12   | 3775688   | 3876446   | +    |
| 20703 | 1451791_at   | Strain | Tfpi              | 21788  | 2    | 84130609  | 84171923  | -    |
| 20704 | 1442071_at   | Strain | Abce1             | 24015  | 8    | 78898390  | 78925732  | -    |
| 20705 | 1415795_at   | Strain | Spin              | 20729  | 13   | 67875489  | 67920302  | -    |
| 20706 | 1435070_at   | Strain | Aebp2             | 11569  | 6    | 141421299 | 141478643 | +    |
| 20707 | 1446536_at   | Strain | Sema6d            | 214968 | 2    | 124124149 | 124181623 | +    |
| 20708 | 1449552_at   | Strain | Zfr               | 22763  | 15   | 11948204  | 11996199  | +    |
| 20709 | 1428425_at   | Strain | Tgfbra1           | 73122  | 1    | 43341936  | 43348292  | -    |
| 20710 | 1418629_a_at | Strain | None              | None   | 4    | 128740932 | 128769419 | -    |
| 20711 | 1437162_at   | Strain | Gpiap1            | 53872  | 2    | 103469773 | 103502351 | -    |
| 20712 | 1443913_at   | Strain | None              | None   | NONE | NONE      | NONE      | NONE |
| 20713 | 1444092_at   | Strain | 9430025M13Rik     | 233147 | 7    | 556       | 2501      | +    |
| 20714 | 1459720_x_at | Strain | Tipin             | 66131  | 9    | 64403798  | 64426983  | +    |
| 20715 | 1458985_at   | Strain | 9330186A19Rik     | 320365 | 5    | 149134722 | 149437633 | +    |
| 20716 | 1450073_at   | Strain | Kif3b             | 16569  | 2    | 152748365 | 152789150 | +    |
| 20717 | 1416839_at   | Strain | Mut               | 17850  | 17   | 38451138  | 38475743  | +    |
| 20718 | 1421116_a_at | Strain | Rtn4              | 68585  | 11   | 29587737  | 29637706  | +    |
| 20719 | 1421025_at   | Strain | Agpat1            | 55979  | 17   | 32312217  | 32316761  | +    |
| 20720 | 1456775_at   | Strain | Ccne2             | 12448  | 4    | 11119669  | 11130063  | +    |
| 20721 | 1430190_at   | Strain | 1700041C02Rik     | 73332  | 4    | 118281798 | 118374408 | -    |
| 20722 | 1454994_at   | Strain | Klhl20            | 226541 | 1    | 160992509 | 161035559 | -    |
| 20723 | 1456341_a_at | Strain | Klf9              | 16601  | 19   | 22379147  | 22404832  | +    |
| 20724 | 1436272_at   | Strain | 1110059F07Rik     | 98732  | 1    | 184746296 | 184782637 | +    |
| 20725 | 1436669_at   | Strain | 1700019G17Rik     | 75541  | 6    | 86328677  | 86334511  | -    |
| 20726 | 1438746_at   | Strain | A530058N18Rik     | 320846 | 2    | 113545163 | 113546130 | +    |
| 20727 | 1432947_at   | Strain | 4921519G19Rik     | 70872  | 10   | 42961228  | 42963044  | +    |
| 20728 | 1434933_at   | Strain | 5730557L09Rik     | 108770 | 1    | 160875856 | 160878819 | +    |
| 20729 | 1444113_at   | Strain | None              | None   | 4    | 147995249 | 147995848 | +    |
| 20730 | 1442785_at   | Strain | Smyd3             | 69726  | 1    | 178910022 | 179472249 | -    |
| 20731 | 1452439_s_at | Strain | Sfrs2             | 20382  | 11   | 116671000 | 116674175 | -    |
|       |              |        | 5830417110Rik /// |        |      |           |           |      |
| 20732 | 1431314_a_at | Strain | LOC545537         | 545537 | 3    | 88519001  | 88569840  | +    |
| 20733 | 1417891_at   | Strain | Tce1              | 79043  | 17   | 22693397  | 22698063  | +    |
| 20734 | 1457886_at   | Strain | LOC552873         | 552873 | 18   | 72339648  | 72340404  | -    |
| 20735 | 1436023_at   | Strain | Bclaf1            | 72567  | 10   | 20239740  | 20267469  | +    |
| 20736 | 1439987_at   | Strain | Grik1             | 14805  | 16   | 87069420  | 87213311  | -    |
| 20737 | 1448805_at   | Strain | Usf1              | 22278  | 1    | 171340520 | 171347582 | +    |
| 20738 | 1451629_at   | Strain | MGI:1925139       | 77889  | 17   | 70694580  | 70718332  | +    |
| 20739 | 1430599_at   | Strain | Myt1l             | 17933  | 12   | 26094752  | 26491102  | +    |
| 20740 | 1426352_s_at | Strain | Tial1             | 21843  | 7    | 122491640 | 122510627 | -    |



|       |              |        |               |        |      |           |           |      |
|-------|--------------|--------|---------------|--------|------|-----------|-----------|------|
| 20741 | 1440582_at   | Strain | 8030492O04Rik | 319234 | 2    | 154659120 | 154659815 | +    |
| 20742 | 1444622_at   | Strain | None          | None   | 4    | 75459434  | 75460720  | -    |
| 20743 | 1422167_at   | Strain | Sema5a        | 20356  | 15   | 32419980  | 32698954  | +    |
| 20744 | 1433671_at   | Strain | A130022J15Rik | 101351 | 6    | 97577445  | 97615221  | -    |
| 20745 | 1418189_s_at | Strain | Ramp2         | 54409  | 11   | 101067518 | 101069332 | +    |
| 20746 | 1457233_at   | Strain | Dnaja2        | 56445  | 8    | 84810414  | 84828045  | -    |
| 20747 | 1417120_at   | Strain | D4Wsu114e     | 28010  | 4    | 146353153 | 146360824 | -    |
| 20748 | 1419257_at   | Strain | Tcea1         | 21399  | 1    | 4818207   | 4858297   | +    |
| 20749 | 1450980_at   | Strain | Gtpbp3        | 70359  | 8    | 70637908  | 70643206  | +    |
| 20750 | 1441212_at   | Strain | 6720467C03Rik | 68099  | 4    | 12080689  | 12098962  | -    |
| 20751 | 1453754_at   | Strain | 4930429A08Rik | 74648  | 4    | 128177291 | 128216596 | -    |
| 20752 | 1456143_at   | Strain | Prkcbp1       | 228880 | 2    | 165242034 | 165353683 | -    |
| 20753 | 1424861_at   | Strain | D930016D06Rik | 100662 | 5    | 103588142 | 103590334 | +    |
| 20754 | 1415759_a_at | Strain | Hbxip         | 68576  | 3    | 107074746 | 107083731 | +    |
| 20755 | 1439405_x_at | Strain | 1700051C09Rik | 68107  | 11   | 101100290 | 101109788 | +    |
| 20756 | 1439686_at   | Strain | Mbnl1         | 56758  | 3    | 60179725  | 60308221  | +    |
| 20757 | 1459332_at   | Strain | None          | None   | 2    | 154633066 | 154633549 | +    |
| 20758 | 1444406_at   | Strain | Map4k3        | 225028 | 17   | 78411242  | 78558951  | -    |
| 20759 | 1448760_at   | Strain | Zfp68         | 24135  | 5    | 137577594 | 137591201 | -    |
| 20760 | 1460442_at   | Strain | Rps19         | 20085  | 7    | 20062265  | 20067353  | +    |
| 20761 | 1429836_at   | Strain | 1810064L21Rik | 66435  | 14   | 113542917 | 113545445 | -    |
| 20762 | 1417571_at   | Strain | Mpg           | 268395 | 11   | 32121305  | 32127494  | +    |
| 20763 | 1424721_at   | Strain | Mfap3         | 216760 | 11   | 57244336  | 57256528  | +    |
| 20764 | 1415859_at   | Strain | Eif3s8        | 56347  | 7    | 120596642 | 120616097 | -    |
| 20765 | 1459751_s_at | Strain | Ppp1r16a      | 73062  | 15   | 76741364  | 76745811  | +    |
| 20766 | 1440771_at   | Strain | Zkscan1       | 74570  | 5    | 137058118 | 137075887 | +    |
| 20767 | 1459048_s_at | Strain | Zfp142        | 77264  | 1    | 74868909  | 74890473  | -    |
| 20768 | 1430811_a_at | Strain | Cdca1         | 66977  | 1    | 169432488 | 169465605 | -    |
| 20769 | 1457904_at   | Strain | None          | None   | NONE | NONE      | NONE      | NONE |
| 20770 | 1438187_at   | Strain | Slc25a29      | 214663 | 12   | 104296871 | 104306869 | -    |
| 20771 | 1456293_s_at | Strain | Ccnh          | 66671  | 13   | 81281211  | 81305457  | +    |
| 20772 | 1439815_at   | Strain | A230048G03Rik | 320473 | 17   | 76575104  | 76657599  | -    |
| 20773 | 1453668_at   | Strain | 3110052M02Rik | 73229  | 17   | 19528262  | 19534084  | +    |
| 20774 | 1415919_at   | Strain | Npdcl         | 18146  | 2    | 25335245  | 25341656  | +    |
| 20775 | 1421251_at   | Strain | Zfp40         | 22700  | 17   | 21075485  | 21079148  | -    |
| 20776 | 1445555_at   | Strain | Trpm3         | 226025 | 19   | 21686135  | 22227805  | +    |
| 20777 | 1428282_at   | Strain | Tbce          | 70430  | 13   | 13440370  | 13482145  | -    |
| 20778 | 1455650_at   | Strain | Srpk2         | 20817  | 5    | 21967253  | 22080468  | -    |
| 20779 | 1440662_at   | Strain | Rgl1          | 19731  | 1    | 152402014 | 152509595 | -    |
| 20780 | 1446934_at   | Strain | None          | None   |      | 18060337  | 18060883  | +    |
| 20781 | 1441576_at   | Strain | 2410002O22Rik | 66975  | 13   | 100361503 | 100396609 | -    |
| 20782 | 1445618_at   | Strain | None          | None   | NONE | NONE      | NONE      | NONE |
| 20783 | 1441437_at   | Strain | Rbms1         | 56878  | 2    | 60608122  | 60818320  | -    |
| 20784 | 1453044_at   | Strain | C030014I23Rik | 77381  | 9    | 44467633  | 44470847  | +    |
| 20785 | 1435814_at   | Strain | Xpo7          | 65246  | 14   | 64979347  | 65026150  | -    |
| 20786 | 1456255_at   | Strain | Al314180      | 230249 | 4    | 58743479  | 58856174  | -    |
| 20787 | 1456187_at   | Strain | Slc7a14       | 241919 | 3    | 30617648  | 30721720  | -    |
| 20788 | 1453634_a_at | Strain | Erp29         | 67397  | 5    | 120596560 | 120604281 | -    |
| 20789 | 1448465_at   | Strain | Nipsnap1      | 18082  | 11   | 4768790   | 4788987   | +    |
| 20790 | 1445235_at   | Strain | Ythdf3        | 229096 | 3    | 15522868  | 15556473  | +    |
| 20791 | 1460567_at   | Strain | 9930116O05Rik | 319758 | 9    | 72752141  | 72755606  | +    |
| 20792 | 1432393_a_at | Strain | 5730409G07Rik | 66628  | 11   | 45700742  | 45708331  | -    |
| 20793 | 1425557_x_at | Strain | Tsc22d3       | 14605  | X    | 134084467 | 134088106 | -    |
| 20794 | 1440555_at   | Strain | Rragd         | 52187  | 4    | 33274625  | 33297732  | +    |
| 20795 | 1416180_a_at | Strain | Rdx           | 19684  | 9    | 52120601  | 52161012  | +    |
| 20796 | 1452625_at   | Strain | Kctd2         | 70382  | 11   | 115241243 | 115252365 | +    |
| 20797 | 1443087_at   | Strain | Cdc23         | 52563  | 18   | 34854705  | 34874773  | -    |
| 20798 | 1460159_at   | Strain | C130067A03Rik | 320713 | 4    | 93917113  | 93954172  | -    |
| 20799 | 1446648_at   | Strain | Stxbp4        | 20913  | 11   | 90301004  | 90459167  | -    |
| 20800 | 1453125_at   | Strain | Sox11         | 20666  | 12   | 23888762  | 23891665  | -    |
| 20801 | 1417261_at   | Strain | Mbtd1         | 103537 | 11   | 93733496  | 93766406  | +    |
| 20802 | 1435661_at   | Strain | Gm972         | 381259 | 1    | 59405529  | 59424743  | -    |
| 20803 | 1453077_a_at | Strain | Snapc3        | 77634  | 4    | 82403941  | 82453789  | +    |
| 20804 | 1441498_at   | Strain | A230006I23Rik | 319919 | 4    | 75378935  | 75379616  | -    |
| 20805 | 1441580_at   | Strain | Sgpp2         | 433323 | 1    | 78598998  | 78708934  | +    |

|       |              |        |                      |        |      |           |           |      |
|-------|--------------|--------|----------------------|--------|------|-----------|-----------|------|
| 20806 | 1425288_at   | Strain | Samd11               | 231004 | NONE | NONE      | NONE      | NONE |
| 20807 | 1458010_at   | Strain | None                 | None   | 4    | 76880139  | 76880987  | -    |
| 20808 | 1443210_at   | Strain | None                 | None   | 5    | 103491009 | 103491676 | -    |
| 20809 | 1436386_x_at | Strain | 2610036A22Rik        | 70190  | 4    | 144744997 | 144745372 | +    |
| 20810 | 1452160_at   | Strain | Tiparp               | 99929  | 3    | 65201879  | 65228950  | +    |
| 20811 | 1438963_s_at | Strain | Tfpt /// LOC546028   | 546028 | 7    | 4443      | 5254      | -    |
| 20812 | 1442992_at   | Strain | 130004C03            | 403343 | 9    | 46088068  | 46088679  | +    |
| 20813 | 1423240_at   | Strain | None                 | None   | 2    | 156914044 | 156928808 | +    |
| 20814 | 1436740_at   | Strain | LOC546041            | 546041 | 8    | 19729849  | 19734189  | +    |
| 20815 | 1420982_at   | Strain | Rnpc2                | 170791 | 2    | 155604575 | 155637077 | -    |
| 20816 | 1453179_at   | Strain | Phca                 | 66190  | 7    | 92263182  | 92356266  | -    |
| 20817 | 1437667_a_at | Strain | Bach2                | 12014  | 4    | 32517743  | 32859992  | +    |
| 20818 | 1423810_at   | Strain | 2700017M01Rik        | 72590  | 7    | 94433409  | 94478568  | -    |
| 20819 | 1434206_s_at | Strain | Ppp2r5c              | 26931  | 12   | 105961123 | 106055786 | +    |
| 20820 | 1436860_at   | Strain | Senp7                | 66315  | 16   | 54970744  | 55086065  | +    |
| 20821 | 1426355_a_at | Strain | 6330578E17Rik        | 76178  | 1    | 37711567  | 37713525  | -    |
| 20822 | 1452674_a_at | Strain | Eif3s12              | 73830  | 7    | 24377989  | 24388482  | -    |
| 20823 | 1441995_at   | Strain | Ncam1                | 17967  | 9    | 49555319  | 49607941  | -    |
| 20824 | 1448516_at   | Strain | Tsn                  | 22099  | 1    | 118048034 | 118060649 | -    |
| 20825 | 1438299_at   | Strain | 9230108I15Rik        | 78078  | 2    | 176507430 | 176508342 | +    |
| 20826 | 1448993_at   | Strain | Atg3l                | 67841  | 16   | 44041871  | 44071580  | +    |
| 20827 | 1427198_at   | Strain | BC022960             | 237246 | X    | 162967594 | 162969545 | +    |
| 20828 | 1454283_at   | Strain | 9130023D20Rik        | 268706 | 13   | 109055082 | 109126917 | +    |
| 20829 | 1455131_at   | Strain | Opa3                 | 403187 | 7    | 16097225  | 16115805  | +    |
| 20830 | 1420999_at   | Strain | Cnot4                | 53621  | 6    | 35139222  | 35227761  | -    |
| 20831 | 1456265_at   | Strain | ---                  | 433605 | 3    | 65339678  | 65400714  | +    |
| 20832 | 1453507_at   | Strain | C030040A15Rik        | 77539  | 2    | 49251015  | 49251960  | +    |
| 20833 | 1435252_at   | Strain | B3galt6              | 117592 | 4    | 154482891 | 154485011 | -    |
| 20834 | 1439111_at   | Strain | None                 | None   | 14   | 70761378  | 70783322  | +    |
| 20835 | 1444034_at   | Strain | Rapgef4              | 56508  | 2    | 71679030  | 71954119  | +    |
| 20836 | 1437749_s_at | Strain | Mrpl9                | 78523  | 3    | 93931159  | 93936531  | +    |
| 20837 | 1439663_at   | Strain | Ptch1                | 19206  | 13   | 60894523  | 60948510  | -    |
| 20838 | 1425548_a_at | Strain | Lst1                 | 16988  | 17   | 32888815  | 32889030  | -    |
| 20839 | 1418514_at   | Strain | Mtf2                 | 17765  | 5    | 107157468 | 107177436 | +    |
| 20840 | 1456748_a_at | Strain | Nipsnap1             | 18082  | 11   | 4768790   | 4788987   | +    |
| 20841 | 1442305_at   | Strain | Gtpbp2               | 56055  | 17   | 43670992  | 43679289  | +    |
| 20842 | 1445299_at   | Strain | Ppm1h                | 319468 | 10   | 122369636 | 122614468 | +    |
| 20843 | 1438407_at   | Strain | 9330132E09Rik        | 319901 | 1    | 111860088 | 111864183 | -    |
| 20844 | 1435135_at   | Strain | Aadacl1              | 320024 | 3    | 26600437  | 26662708  | +    |
| 20845 | 1429463_at   | Strain | Prkaa2               | 108079 | 4    | 103993895 | 104068774 | -    |
| 20846 | 1441381_at   | Strain | 9430029E18Rik        | 320780 | NONE | NONE      | NONE      | NONE |
| 20847 | 1435860_at   | Strain | Slc5a6 /// LOC434043 | 330064 | 5    | 29494974  | 29507187  | -    |
| 20848 | 1443931_at   | Strain | Zfp617               | 170938 | 8    | 71079283  | 71092128  | +    |
| 20849 | 1454510_at   | Strain | 2900034C19Rik        | 72854  | 4    | 102670564 | 102671805 | +    |
| 20850 | 1440465_at   | Strain | Cutl1                | 13047  | 5    | 135261627 | 135499343 | -    |
| 20851 | 1426803_at   | Strain | 1700009P03Rik        | 74213  | 14   | 99658921  | 99720050  | -    |
| 20852 | 1419685_at   | Strain | Rent1                | 19704  | 8    | 69485033  | 69506716  | -    |
| 20853 | 1452735_at   | Strain | Pcnp                 | 328694 | 16   | 54911436  | 54920579  | -    |
| 20854 | 1419041_at   | Strain | D8Wsu49e             | 71927  | 8    | 84991315  | 85113385  | -    |
| 20855 | 1420863_at   | Strain | Dctn4                | 67665  | 18   | 60751547  | 60784088  | +    |
| 20856 | 1423734_at   | Strain | Rac1                 | 19353  | 5    | 142563708 | 142586223 | -    |
| 20857 | 1422805_a_at | Strain | Ing3                 | 71777  | 6    | 21996682  | 22023073  | +    |
| 20858 | 1417784_at   | Strain | Als2                 | 74018  | 1    | 59468051  | 59542338  | -    |
| 20859 | 1424317_at   | Strain | Slc25a19             | 67283  | 11   | 115436076 | 115449232 | -    |
| 20860 | 1460585_x_at | Strain | Pisd                 | 320951 | 5    | 31224767  | 31274080  | -    |
| 20861 | 1431337_a_at | Strain | 1810055E12Rik        | 67894  | 19   | 60412054  | 60436632  | +    |
| 20862 | 1457756_at   | Strain | Zfp192               | 93681  | 13   | 20999835  | 21011161  | -    |
| 20863 | 1447628_x_at | Strain | None                 | None   | 2    | 127118377 | 127118517 | +    |
| 20864 | 1435321_at   | Strain | 3732412D22Rik        | 77569  | 5    | 65624008  | 65822238  | +    |
| 20865 | 1431053_at   | Strain | Mphosph9             | 269702 | 5    | 123422304 | 123499213 | -    |
| 20866 | 1445290_at   | Strain | Hunk                 | 26559  | 16   | 89543829  | 89656985  | +    |
| 20867 | 1440345_at   | Strain | None                 | None   | 11   | 83021588  | 83022623  | +    |
| 20868 | 1446445_at   | Strain | None                 | None   | 12   | 33216600  | 33217261  | +    |
| 20869 | 1437301_a_at | Strain | Dvl1                 | 13542  | 4    | 154339774 | 154351665 | +    |

|       |              |        |                                                                               |        |      |           |           |      |
|-------|--------------|--------|-------------------------------------------------------------------------------|--------|------|-----------|-----------|------|
| 20870 | 1436388_a_at | Strain | 3830406C13Rik                                                                 | 218734 | 14   | 10742091  | 10761089  | +    |
| 20871 | 1428589_at   | Strain | 2810443J12Rik                                                                 | 67228  | 2    | 24894607  | 24905633  | +    |
| 20872 | 1418225_at   | Strain | Orc2l                                                                         | 18393  | 1    | 58767641  | 58809789  | -    |
| 20873 | 1455905_at   | Strain | 2610507B11Rik                                                                 | 72503  | 11   | 77987415  | 78016282  | +    |
| 20874 | 1438936_s_at | Strain | Ang1                                                                          | 11727  | 14   | 46191054  | 46196646  | +    |
| 20875 | 1456767_at   | Strain | Lfn3                                                                          | 233067 | 7    | 25769598  | 25776923  | -    |
| 20876 | 1429535_at   | Strain | Armc8                                                                         | 74125  | 9    | 99381642  | 99469875  | -    |
| 20877 | 1422953_at   | Strain | Fpr-rs2                                                                       | 14289  | 17   | 15751691  | 15757819  | +    |
| 20878 | 1455933_at   | Strain | 1500010G04Rik                                                                 | 68965  | 6    | 49394626  | 49398413  | -    |
| 20879 | 1439847_s_at | Strain | Klf12                                                                         | 16597  | 14   | 94399045  | 94678209  | -    |
| 20880 | 1437883_s_at | Strain | None                                                                          | None   | 5    | 146421353 | 146424825 | +    |
| 20881 | 1437904_at   | Strain | MGI:2387367<br>LOC433698 ///                                                  | 241490 | 2    | 76067817  | 76081465  | +    |
| 20882 | 1439647_at   | Strain | LOC545611                                                                     | 433698 | 4    | 42763995  | 42769810  | -    |
| 20883 | 1418962_at   | Strain | 1110005F07Rik                                                                 | 66147  | 4    | 139947778 | 139959595 | -    |
| 20884 | 1458026_at   | Strain | None                                                                          | None   | 4    | 54929247  | 54930034  | +    |
| 20885 | 1426559_at   | Strain | Sbno1                                                                         | 243272 | 5    | 123544504 | 123597297 | -    |
| 20886 | 1427406_at   | Strain | Trip11                                                                        | 109181 | 12   | 97280506  | 97358629  | -    |
| 20887 | 1452590_a_at | Strain | Plac9                                                                         | 211623 | 14   | 24264282  | 24278771  | -    |
| 20888 | 1418794_at   | Strain | Cds2                                                                          | 110911 | 2    | 131777151 | 131821546 | +    |
| 20889 | 1453550_a_at | Strain | Mlst2                                                                         | 67420  | 7    | 107366377 | 107420898 | +    |
| 20890 | 1424159_at   | Strain | 1300010M03Rik                                                                 | 67998  | 11   | 100917409 | 100940930 | -    |
| 20891 | 1457338_at   | Strain | Al132431                                                                      | 329251 | 1    | 134609330 | 134806191 | -    |
| 20892 | 1443323_at   | Strain | A930028L21Rik                                                                 | 229780 | 3    | 115354021 | 115363721 | -    |
| 20893 | 1444589_at   | Strain | None                                                                          | None   | 17   | 20092968  | 20093341  | -    |
| 20894 | 1416035_at   | Strain | None                                                                          | None   | 12   | 70756312  | 70795958  | +    |
| 20895 | 1433799_at   | Strain | Rdh13                                                                         | 108841 | 7    | 3656644   | 3676589   | -    |
| 20896 | 1439712_at   | Strain | 4921521J11Rik                                                                 | 70885  | 8    | 67943264  | 67976954  | +    |
| 20897 | 1456398_at   | Strain | Al316828                                                                      | 544752 | 11   | 3541653   | 3542296   | +    |
| 20898 | 1425201_a_at | Strain | Hyi                                                                           | 68180  | 4    | 117318916 | 117321649 | +    |
| 20899 | 1416744_at   | Strain | Uap1                                                                          | 107652 | 1    | 170076180 | 170109123 | -    |
| 20900 | 1443949_at   | Strain | Ppp2r5e                                                                       | 26932  | 12   | 72307243  | 72452562  | -    |
| 20901 | 1452787_a_at | Strain | Hrmt1l2                                                                       | 15469  | 7    | 39053300  | 39062874  | -    |
| 20902 | 1448214_at   | Strain | Pdhb                                                                          | 68263  | 14   | 5833813   | 5841767   | -    |
| 20903 | 1438576_x_at | Strain | 2900056M20Rik                                                                 | 72997  | NONE | NONE      | NONE      | NONE |
| 20904 | 1420547_at   | Strain | Galc                                                                          | 14420  | 12   | 93629142  | 93686179  | -    |
| 20905 | 1437629_at   | Strain | Arhgef19                                                                      | 213649 | 4    | 140124145 | 140138823 | +    |
| 20906 | 1441945_s_at | Strain | Abhd14a                                                                       | 68644  | 9    | 106433630 | 106441207 | -    |
| 20907 | 1427329_a_at | Strain | Igh-6                                                                         | 16019  | 12   | 110057802 | 110059089 | -    |
| 20908 | 1452827_at   | Strain | 1500009C09Rik                                                                 | 76505  | 15   | 82306812  | 82311469  | +    |
| 20909 | 1419453_at   | Strain | Uchl5                                                                         | 56207  | 1    | 143609398 | 143638878 | +    |
| 20910 | 1440807_at   | Strain | Acvrinp1                                                                      | 50791  | 5    | 18347411  | 19110332  | +    |
| 20911 | 1429239_a_at | Strain | Stard4                                                                        | 170459 | 18   | 33424453  | 33436848  | -    |
| 20912 | 1448491_at   | Strain | Ech1                                                                          | 51798  | 7    | 24231204  | 24238206  | +    |
| 20913 | 1416409_at   | Strain | Acox1                                                                         | 11430  | 11   | 115992984 | 116019869 | -    |
| 20914 | 1456933_at   | Strain | None                                                                          | None   | 1    | 152772718 | 152773104 | -    |
| 20915 | 1424385_at   | Strain | 5830417I10Rik                                                                 | 76022  | 3    | 420       | 48501     | +    |
| 20916 | 1439493_at   | Strain | D630040G17Rik                                                                 | 244530 | 8    | 78406599  | 78407363  | +    |
| 20917 | 1429371_at   | Strain | 2810426N06Rik                                                                 | 67607  | 7    | 35800477  | 35817826  | +    |
| 20918 | 1438419_at   | Strain | Rbm16                                                                         | 106583 | 17   | 3065810   | 3160145   | +    |
| 20919 | 1423694_at   | Strain | Kctd10                                                                        | 330171 | 5    | 113474143 | 113491040 | -    |
| 20920 | 1433682_at   | Strain | Arhgef17                                                                      | 207212 | 7    | 94978006  | 95038415  | -    |
| 20921 | 1457822_at   | Strain | None                                                                          | None   | 1    | 37209777  | 37210188  | -    |
| 20922 | 1441058_at   | Strain | Itpkb                                                                         | 320404 | 1    | 180285325 | 180377369 | +    |
| 20923 | 1423417_at   | Strain | Smarcc1                                                                       | 20588  | 9    | 110159869 | 110278595 | +    |
| 20924 | 1440375_at   | Strain | None                                                                          | None   | 6    | 143921132 | 143921901 | -    |
| 20925 | 1418008_at   | Strain | 1810007M14Rik<br>Hmgb1 ///<br>LOC433238 ///<br>LOC434174 ///<br>LOC545555 /// | 67367  | 16   | 90171076  | 90201546  | -    |
| 20926 | 1439463_x_at | Strain | LOC545917                                                                     | 15289  | 5    | 147944154 | 147949960 | -    |
| 20927 | 1453559_a_at | Strain | Sel1h                                                                         | 20338  | 12   | 87225863  | 87265702  | -    |
| 20928 | 1453739_at   | Strain | 1110001A23Rik                                                                 | 68472  | 7    | 84518566  | 84525733  | -    |
| 20929 | 1438123_at   | Strain | None                                                                          | None   | 8    | 68532721  | 68533275  | -    |

|       |              |        |               |        |      |           |           |      |
|-------|--------------|--------|---------------|--------|------|-----------|-----------|------|
| 20930 | 1451602_at   | Strain | Snx6          | 72183  | 12   | 0         | 675       | -    |
| 20931 | 1439554_at   | Strain | Scmh1         | 29871  | 4    | 119469474 | 119552399 | +    |
| 20932 | 1429490_at   | Strain | Rif1          | 51869  | 2    | 52004994  | 52054222  | +    |
| 20933 | 1453067_at   | Strain | 2610040C18Rik | 69928  | 4    | 147620711 | 147629912 | -    |
| 20934 | 1430992_s_at | Strain | 1500009M05Rik | 67006  | 3    | 134289421 | 134306505 | -    |
| 20935 | 1418409_at   | Strain | Jrk           | 16469  | 15   | 74734074  | 74740959  | -    |
| 20936 | 1456066_a_at | Strain | Rpo1-4        | 20019  | 6    | 72241050  | 72311336  | +    |
| 20937 | 1458408_at   | Strain | Samd8         | 67630  | 14   | 20115199  | 20157956  | +    |
| 20938 | 1456683_at   | Strain | 5730555F13Rik | 66660  | 9    | 70720790  | 70732757  | +    |
| 20939 | 1431068_at   | Strain | 1110007A06Rik | 68477  | 6    | 71723228  | 71772465  | -    |
| 20940 | 1440651_at   | Strain | Dusp16        | 70686  | 6    | 135472936 | 135549943 | -    |
| 20941 | 1443235_at   | Strain | Eif2ak4       | 27103  | 2    | 117902466 | 117989082 | +    |
| 20942 | 1424082_at   | Strain | Tbc1d13       | 70296  | 2    | 30066028  | 30084175  | +    |
| 20943 | 1424598_at   | Strain | Ddx6          | 13209  | 9    | 44593753  | 44625961  | +    |
| 20944 | 1435777_at   | Strain | E030018N11Rik | 319622 | 7    | 112360968 | 112362974 | -    |
| 20945 | 1430997_at   | Strain | Cd47          | 16423  | 16   | 48697237  | 48753271  | +    |
| 20946 | 1451238_at   | Strain | 1200003C05Rik | 104771 | 12   | 68925221  | 68939959  | +    |
| 20947 | 1443884_at   | Strain | Thada         | 240174 | 17   | 82025019  | 82299790  | -    |
| 20948 | 1443991_at   | Strain | Dock1         | 330662 | 7    | 129038306 | 129541299 | +    |
| 20949 | 1428592_s_at | Strain | Usp38         | 74841  | 8    | 80192741  | 80226914  | -    |
| 20950 | 1440614_at   | Strain | A330041B18Rik | 104707 | 11   | 97311166  | 97311837  | +    |
| 20951 | 1450007_at   | Strain | 1500003O03Rik | 56398  | 2    | 119061563 | 119100869 | +    |
| 20952 | 1460392_a_at | Strain | Eny2          | 223527 | 15   | 44373735  | 44383309  | +    |
| 20953 | 1437743_at   | Strain | Aebp2         | 11569  | 6    | 141421299 | 141478643 | +    |
| 20954 | 1453133_at   | Strain | Slc25a31      | 73333  | 3    | 40128629  | 40145290  | +    |
| 20955 | 1456706_at   | Strain | 4833441D16Rik | 108962 | 5    | 3578638   | 3579464   | +    |
| 20956 | 1442537_at   | Strain | None          | None   | 3    | 17854831  | 17855401  | +    |
| 20957 | 1416525_at   | Strain | Spop          | 20747  | 11   | 95235201  | 95314100  | +    |
| 20958 | 1418506_a_at | Strain | Prdx2         | 21672  | 8    | 84237800  | 84242986  | +    |
| 20959 | 1434753_at   | Strain | Nfrkb         | 235134 | 9    | 31308665  | 31343681  | +    |
| 20960 | 1438228_at   | Strain | 4930452B06Rik | 74430  | 14   | 6100611   | 6335659   | -    |
| 20961 | 1438069_a_at | Strain | Rbm5          | 83486  | 9    | 107808484 | 107838963 | -    |
| 20962 | 1434020_at   | Strain | Pdap1         | 231887 | 5    | 144168088 | 144178675 | -    |
| 20963 | 1458091_at   | Strain | Dpp10         | 269109 | 1    | 123096743 | 123812573 | -    |
| 20964 | 1449960_at   | Strain | Nptx2         | 53324  | 5    | 143587516 | 143599211 | +    |
| 20965 | 1446700_at   | Strain | AA536808      | 98214  | NONE | NONE      | NONE      | NONE |
| 20966 | 1435998_at   | Strain | ---           | 239083 | 14   | 45884453  | 45890368  | -    |
| 20967 | 1427353_at   | Strain | Clasp1        | 76707  | 1    | 118140712 | 118256976 | +    |
| 20968 | 1439075_at   | Strain | None          | None   | 2    | 143996949 | 143998929 | +    |
| 20969 | 1430436_at   | Strain | 3321401G04Rik | 77574  | 6    | 42816018  | 42836530  | -    |
| 20970 | 1439477_at   | Strain | 5430406J06Rik | 73848  | 11   | 51746391  | 51747335  | -    |
| 20971 | 1444855_at   | Strain | None          | None   | 9    | 44479760  | 44480621  | +    |
| 20972 | 1435082_at   | Strain | Sypl          | 19027  | 12   | 29560169  | 29583105  | +    |
| 20973 | 1459902_at   | Strain | 2700007P21Rik | 212772 | 2    | 106588216 | 106594178 | -    |
| 20974 | 1446353_at   | Strain | Tubb6         | 67951  | 18   | 67621399  | 67633418  | +    |
| 20975 | 1444530_at   | Strain | None          | None   | 2    | 52067889  | 52068457  | +    |
| 20976 | 1457817_at   | Strain | Bcas3         | 192197 | 11   | 85081206  | 85554043  | +    |
| 20977 | 1436678_at   | Strain | ---           | 433905 | 5    | 72422689  | 72423167  | -    |
| 20978 | 1424654_at   | Strain | Acp2          | 11432  | 2    | 90907679  | 90916892  | +    |
| 20979 | 1459270_at   | Strain | Abcc1         | 17250  | 16   | 13097054  | 13210369  | +    |
| 20980 | 1448939_at   | Strain | Usp25         | 30940  | 16   | 76100019  | 76202730  | +    |
| 20981 | 1455380_at   | Strain | C630049M13    | 240334 | 18   | 61925649  | 61936447  | -    |
| 20982 | 1441683_at   | Strain | 1110033M05Rik | 68675  | 13   | 73773385  | 74230386  | +    |
| 20983 | 1427695_a_at | Strain | Pou2f1        | 18986  | 1    | 165797249 | 165856725 | -    |
| 20984 | 1455849_at   | Strain | Nav1          | 215690 | 1    | 135289346 | 135436181 | -    |
| 20985 | 1430696_at   | Strain | Eif2ak1       | 15467  | 5    | 142939806 | 142944198 | +    |
| 20986 | 1447058_at   | Strain | A530058N18Rik | 320846 | 2    | 113529139 | 113529687 | +    |
| 20987 | 1460020_at   | Strain | None          | None   | 8    | 122312780 | 122423305 | -    |
| 20988 | 1444701_at   | Strain | A130001D14Rik | 399620 | 18   | 73811546  | 73812561  | +    |
| 20989 | 1415712_at   | Strain | Zranb1        | 360216 | 7    | 127315953 | 127350282 | +    |
| 20990 | 1452151_at   | Strain | BC021523      | 223752 | 15   | 86107573  | 86187401  | +    |
| 20991 | 1451735_at   | Strain | Arfrp1        | 76688  | 2    | 181074790 | 181082318 | -    |
| 20992 | 1441423_at   | Strain | Ece1          | 230857 | 4    | 136743558 | 136846490 | +    |
| 20993 | 1423169_at   | Strain | Taf7          | 24074  | 18   | 37864624  | 37867888  | -    |
| 20994 | 1451839_a_at | Strain | Pde7a         | 18583  | 3    | 18563269  | 18602308  | -    |

|       |              |        |                         |        |      |           |           |      |
|-------|--------------|--------|-------------------------|--------|------|-----------|-----------|------|
| 20995 | 1436380_at   | Strain | Cdc42bpa                | 226751 | 1    | 180019272 | 180119848 | +    |
| 20996 | 1417034_at   | Strain | Trappc6a                | 67091  | 7    | 16377969  | 16385389  | +    |
| 20997 | 1434562_at   | Strain | Mfap3                   | 216760 | 11   | 57244336  | 57256528  | +    |
| 20998 | 1455712_at   | Strain | Hist3h2a                | 319162 | 11   | 58680314  | 58682303  | +    |
| 20999 | 1459194_at   | Strain | 2210408I21Rik           | 72371  | 13   | 73228402  | 73229101  | +    |
| 21000 | 1434280_at   | Strain | None                    | None   | NONE | NONE      | NONE      | NONE |
| 21001 | 1459101_at   | Strain | C78760                  | 96972  | NONE | NONE      | NONE      | NONE |
| 21002 | 1417066_at   | Strain | Cabc1                   | 67426  | 1    | 180120861 | 180136493 | -    |
| 21003 | 1458247_s_at | Strain | Dctn5                   | 59288  | 7    | 116010930 | 116026902 | +    |
| 21004 | 1440513_at   | Strain | C80258                  | 97540  | 9    | 46093722  | 46094403  | +    |
| 21005 | 1438682_at   | Strain | Pik3r1                  | 18708  | 13   | 97857040  | 97865195  | -    |
| 21006 | 1447526_at   | Strain | D5Erd255e               | 52183  | 5    | 117735349 | 117735680 | +    |
| 21007 | 1419564_at   | Strain | Zfp467                  | 68910  | 6    | 48570465  | 48578486  | -    |
| 21008 | 1426046_a_at | Strain | Rabggta                 | 56187  | 14   | 50233893  | 50240192  | -    |
| 21009 | 1446407_at   | Strain | C130067A03Rik           | 320713 | 4    | 93917113  | 93954172  | -    |
| 21010 | 1428769_at   | Strain | Tatdn3                  | 68972  | 1    | 190769675 | 190799261 | -    |
| 21011 | 1428693_at   | Strain | 2610044O15Rik           | 72139  | 8    | 624       | 17937     | -    |
| 21012 | 1439655_at   | Strain | Ube2d2                  | 56550  | 18   | 35995272  | 36030828  | +    |
| 21013 | 1459953_at   | Strain | AW011752                | 104570 | 11   | 29067786  | 29113926  | +    |
| 21014 | 1418801_at   | Strain | Zkscan1                 | 74570  | 5    | 137058118 | 137075887 | +    |
| 21015 | 1437521_s_at | Strain | E230022H04Rik           | 225339 | 18   | 32000024  | 32022887  | +    |
| 21016 | 1455757_at   | Strain | LOC241944               | 241944 | 3    | 35611228  | 35628140  | +    |
| 21017 | 1444585_at   | Strain | Adc                     | 242669 | 4    | 127959259 | 127989530 | -    |
| 21018 | 1430585_at   | Strain | 5930436O19Rik           | 77068  | 17   | 85916777  | 85918308  | -    |
| 21019 | 1447977_x_at | Strain | None                    | None   | NONE | NONE      | NONE      | NONE |
| 21020 | 1431062_a_at | Strain | Sec8l1                  | 20336  | 6    | 33334773  | 34062752  | +    |
| 21021 | 1435520_at   | Strain | Msi2h                   | 76626  | 11   | 88067452  | 88208048  | -    |
| 21022 | 1458074_at   | Strain | ---                     | 328280 | 13   | 64446036  | 64455687  | +    |
| 21023 | 1436781_at   | Strain | Man2b1                  | 17159  | 8    | 84354016  | 84368320  | +    |
| 21024 | 1433838_at   | Strain | Dars2                   | 226539 | 1    | 160945706 | 160974780 | -    |
| 21025 | 1429040_at   | Strain | 2610005L07Rik           | 381598 | 15   | 1398      | 8167      | +    |
| 21026 | 1418664_at   | Strain | Mpdz                    | 17475  | 4    | 80278786  | 80441865  | -    |
| 21027 | 1460621_x_at | Strain | Ywhaq                   | 22630  | 12   | 18728420  | 18754333  | +    |
| 21028 | 1446434_at   | Strain | Galnact2                | 78752  | 6    | 118540028 | 118571686 | -    |
| 21029 | 1441434_at   | Strain | 2810426N06Rik           | 67607  | 7    | 35800477  | 35817826  | +    |
| 21030 | 1458617_at   | Strain | Prkcbp1                 | 228880 | 2    | 165242034 | 165353683 | -    |
| 21031 | 1424171_a_at | Strain | Hagh                    | 14651  | 17   | 22655960  | 22670054  | +    |
| 21032 | 1450856_at   | Strain | Arvcf                   | 11877  | 16   | 17119316  | 17178126  | +    |
| 21033 | 1452452_at   | Strain | None                    | None   | NONE | NONE      | NONE      | NONE |
| 21034 | 1443573_at   | Strain | Parp1                   | 11545  | 1    | 180523221 | 180555500 | +    |
| 21035 | 1423787_at   | Strain | Nup133                  | 234865 | 8    | 123186372 | 123236337 | -    |
| 21036 | 1456264_at   | Strain | Commnd7                 | 99311  | 2    | 153075770 | 153089667 | -    |
| 21037 | 1429372_at   | Strain | Sox11                   | 20666  | 12   | 23888762  | 23891665  | -    |
| 21038 | 1420936_s_at | Strain | Cpsf2                   | 51786  | 12   | 97421457  | 97450986  | +    |
| 21039 | 1439020_at   | Strain | AW146020                | 330361 | 6    | 82259659  | 82294463  | +    |
| 21040 | 1438686_at   | Strain | Eif4g1 ///<br>LOC547244 | 208643 | 16   | 19444890  | 19465024  | +    |
|       |              |        | Ppih /// LOC433064      |        |      |           |           |      |
| 21041 | 1424136_a_at | Strain | /// LOC434090           | 433064 | 17   | 8062709   | 8069598   | -    |
| 21042 | 1426743_at   | Strain | MGI:2384914             | 216190 | 10   | 83487957  | 83536588  | -    |
| 21043 | 1438053_at   | Strain | Tfg                     | 21787  | 16   | 55593941  | 55620963  | -    |
| 21044 | 1425076_at   | Strain | Dnajc18                 | 76594  | 18   | 35897492  | 35926786  | -    |
| 21045 | 1452727_at   | Strain | 1300003K24Rik           | 71750  | 10   | 127157504 | 127235986 | +    |
| 21046 | 1441704_at   | Strain | Plekha5                 | 109135 | 6    | 141327040 | 141388972 | +    |
| 21047 | 1441959_s_at | Strain | 1200003C05Rik           | 104771 | 12   | 68925221  | 68939959  | +    |
| 21048 | 1432471_at   | Strain | 5730419I09Rik           | 74741  | 6    | 143857967 | 143947128 | -    |
| 21049 | 1449042_at   | Strain | Ctcf                    | 13018  | 8    | 104932169 | 104978643 | +    |
| 21050 | 1451243_at   | Strain | Rnpep                   | 215615 | 1    | 135113205 | 135134507 | -    |
| 21051 | 1443837_x_at | Strain | Bcl2                    | 12043  | 1    | 106479000 | 106655083 | -    |
| 21052 | 1453311_at   | Strain | 2310008B10Rik           | 70094  | 2    | 155336822 | 155338298 | -    |
| 21053 | 1458318_at   | Strain | 3110047M12Rik           | 73184  | 15   | 41732796  | 41733127  | +    |
| 21054 | 1453582_at   | Strain | Chka                    | 12660  | 19   | 3640704   | 3683157   | +    |
| 21055 | 1443006_at   | Strain | Timp3                   | 21859  | 10   | 86261055  | 86310024  | +    |
| 21056 | 1452433_at   | Strain | None                    | None   | NONE | NONE      | NONE      | NONE |

|       |              |        |                   |        |      |           |           |      |
|-------|--------------|--------|-------------------|--------|------|-----------|-----------|------|
| 21057 | 1427207_s_at | Strain | Afg3l2            | 69597  | 18   | 67635433  | 67694777  | -    |
| 21058 | 1452667_at   | Strain | Rab2b             | 76338  | 14   | 47361876  | 47379434  | -    |
| 21059 | 1460590_s_at | Strain | Ywhaq             | 22630  | 12   | 18728420  | 18754333  | +    |
| 21060 | 1431102_at   | Strain | 4933409L06Rik     | 74081  | 1    | 155740307 | 155868596 | -    |
| 21061 | 1450527_at   | Strain | Sstr1             | 20605  | 12   | 54943281  | 54945921  | +    |
| 21062 | 1457137_at   | Strain | None              | None   | 4    | 77276562  | 77276830  | +    |
| 21063 | 1418846_at   | Strain | Ap4m1             | 11781  | 5    | 137144830 | 137151495 | +    |
| 21064 | 1421500_at   | Strain | Sts               | 20905  | NONE | NONE      | NONE      | NONE |
| 21065 | 1436766_at   | Strain | None              | None   | 6    | 38703619  | 38727602  | +    |
| 21066 | 1424325_at   | Strain | Esco1             | 77805  | 18   | 10611852  | 10655599  | -    |
| 21067 | 1429158_at   | Strain | Fbxo28            | 67948  | 1    | 182273786 | 182300573 | -    |
|       |              |        | A530054K11Rik /// |        |      |           |           |      |
| 21068 | 1438491_x_at | Strain | LOC432771         | 212281 | 13   | 64221810  | 64243402  | -    |
| 21069 | 1442109_at   | Strain | None              | None   | NONE | NONE      | NONE      | NONE |
| 21070 | 1455153_at   | Strain | Zfp236            | 329002 | 18   | 82763227  | 82861085  | -    |
| 21071 | 1444120_at   | Strain | Bin1              | 30948  | 18   | 32617401  | 32675875  | +    |
| 21072 | 1452563_a_at | Strain | Jarid1d           | 20592  | Y    | 234392    | 280253    | +    |
| 21073 | 1425485_at   | Strain | Mtmr6             | 219135 | 14   | 54801634  | 54838504  | +    |
| 21074 | 1453083_at   | Strain | 6430701C03Rik     | 76229  | 7    | 6418978   | 6446169   | -    |
| 21075 | 1429232_at   | Strain | 2610528B01Rik     | 70042  | 4    | 135225508 | 135227205 | +    |
| 21076 | 1453795_at   | Strain | Fahd2a            | 68126  | 2    | 126950068 | 126958394 | -    |
| 21077 | 1444810_at   | Strain | Acac              | 107476 | 11   | 84051605  | 84052700  | +    |
| 21078 | 1449839_at   | Strain | Casp3             | 12367  | 8    | 45564226  | 45585494  | +    |
| 21079 | 1435868_at   | Strain | AI505652          | 433667 | 3    | 156956709 | 157015617 | +    |
| 21080 | 1431266_at   | Strain | 5830433G22Rik     | 76035  | 1    | 186744325 | 186745845 | +    |
| 21081 | 1456492_at   | Strain | 9130404D08Rik     | 74549  | 8    | 69170702  | 69194854  | -    |
| 21082 | 1433374_at   | Strain | 6030455L14Rik     | 77725  | 5    | 29980760  | 29981515  | -    |
| 21083 | 1457908_at   | Strain | 6430585N13Rik     | 240476 | 18   | 84375240  | 84757026  | -    |
| 21084 | 1421816_at   | Strain | Gsr               | 14782  | 8    | 32458839  | 32503763  | +    |
| 21085 | 1417913_at   | Strain | 2810037C03Rik     | 109145 | 8    | 21981204  | 21992238  | -    |
| 21086 | 1429283_at   | Strain | 1500009M05Rik     | 67006  | 3    | 134289421 | 134306505 | -    |
| 21087 | 1436494_x_at | Strain | D8Ert812e         | 212528 | 8    | 83954671  | 83965285  | +    |
| 21088 | 1415807_s_at | Strain | Sfrs2             | 20382  | 11   | 116671000 | 116674175 | -    |
| 21089 | 1438652_x_at | Strain | Pigq              | 14755  | 17   | 3046      | 4385      | -    |
| 21090 | 1428306_at   | Strain | Ddit4             | 74747  | 10   | 59905319  | 59907414  | -    |
| 21091 | 1428909_at   | Strain | A130040M12Rik     | 319269 | NONE | NONE      | NONE      | NONE |
| 21092 | 1437840_s_at | Strain | AI325464          | 98314  | 1    | 3039      | 7113      | +    |
| 21093 | 1444564_at   | Strain | Apod              | 11815  | 16   | 30106394  | 30123724  | -    |
|       |              |        | Ccl21b ///        |        |      |           |           |      |
| 21094 | 1419426_s_at | Strain | Ccl21c            | 18829  | 4    | 42689442  | 42690573  | -    |
| 21095 | 1443697_at   | Strain | None              | None   | 7    | 55605058  | 55605306  | -    |
| 21096 | 1431926_a_at | Strain | 1300010M03Rik     | 67998  | 11   | 100917409 | 100940930 | -    |
| 21097 | 1424573_at   | Strain | Tmed5             | 73130  | 5    | 107193657 | 107204601 | -    |
| 21098 | 1451181_at   | Strain | 2410008J05Rik     | 69195  | 12   | 108662283 | 108665876 | +    |
| 21099 | 1433241_at   | Strain | 9430013L17Rik     | 77266  | 10   | 6079229   | 6080201   | +    |
| 21100 | 1442188_at   | Strain | 4921504N20Rik     | 78251  | 13   | 63642005  | 63664985  | -    |
| 21101 | 1436812_at   | Strain | Fkrp              | 243853 | 7    | 13760291  | 13767676  | -    |
| 21102 | 1435309_at   | Strain | BC019943          | 234138 | 8    | 29932839  | 29943872  | +    |
| 21103 | 1440776_at   | Strain | 3732412D22Rik     | 77569  | 5    | 65624008  | 65822238  | +    |
| 21104 | 1459635_at   | Strain | Dlgh1             | 13383  | 16   | 30473410  | 30682717  | +    |
| 21105 | 1446362_at   | Strain | None              | None   | NONE | NONE      | NONE      | NONE |
| 21106 | 1442524_at   | Strain | None              | None   | NONE | NONE      | NONE      | NONE |
| 21107 | 1453654_at   | Strain | Cnot10            | 78893  | 9    | 114550674 | 114606723 | -    |
| 21108 | 1416523_at   | Strain | Rnase1            | 19752  | 14   | 46239425  | 46241190  | -    |
| 21109 | 1442102_at   | Strain | Aco2              | 11429  | 15   | 81923222  | 81965850  | +    |
| 21110 | 1450660_at   | Strain | Pts               | 19286  | 9    | 50593943  | 50600967  | -    |
| 21111 | 1430566_at   | Strain | 4733401A01Rik     | 70833  | 4    | 130684788 | 130686185 | +    |
|       |              |        | Serpina1b ///     |        |      |           |           |      |
|       |              |        | Serpina1d ///     |        |      |           |           |      |
| 21112 | 1418282_x_at | Strain | Serpina1e         | 20701  | 12   | 99172098  | 99219702  | -    |
| 21113 | 1459187_at   | Strain | Siat4c            | 20443  | 9    | 34960623  | 35030854  | -    |
| 21114 | 1428200_a_at | Strain | Ntan1             | 18203  | 16   | 12555143  | 12571313  | +    |
| 21115 | 1452258_at   | Strain | 6820402O20Rik     | 228829 | 2    | 155653612 | 155764373 | +    |
| 21116 | 1427077_a_at | Strain | Ap2b1             | 71770  | 11   | 83030763  | 83131001  | +    |
| 21117 | 1415784_at   | Strain | Vps35             | 65114  | 8    | 84533166  | 84572272  | -    |

|       |              |        |                   |        |      |           |           |      |
|-------|--------------|--------|-------------------|--------|------|-----------|-----------|------|
| 21118 | 1452030_a_at | Strain | Hnrpr             | 74326  | 4    | 135192229 | 135221935 | +    |
| 21119 | 1434118_at   | Strain | 0610009K11Rik     | 68350  | 4    | 137315933 | 137323526 | +    |
| 21120 | 1448674_at   | Strain | Rnf25             | 57751  | 1    | 74896219  | 74903844  | -    |
| 21121 | 1448933_at   | Strain | Pcdhb17           | 93888  | 18   | 37708741  | 37712012  | +    |
| 21122 | 1419920_s_at | Strain | Usp7              | 252870 | 16   | 8364073   | 8389916   | -    |
| 21123 | 1447693_s_at | Strain | Neo1              | 18007  | 9    | 58995038  | 59154898  | -    |
| 21124 | 1439138_at   | Strain | 2310035C23Rik     | 227446 | 1    | 105555177 | 105695178 | +    |
| 21125 | 1453109_at   | Strain | 2810429K17Rik     | 77041  | 13   | 72117991  | 72155720  | -    |
| 21126 | 1450083_at   | Strain | Cnot4             | 53621  | 6    | 35139222  | 35227761  | -    |
| 21127 | 1452064_at   | Strain | Crsp3             | 70208  | 10   | 24869993  | 24889699  | +    |
| 21128 | 1428949_at   | Strain | Xpot              | 73192  | 10   | 121243639 | 121282407 | -    |
| 21129 | 1449211_at   | Strain | Bpnt1             | 23827  | 1    | 184830611 | 184856221 | +    |
| 21130 | 1428161_a_at | Strain | Chchd2            | 14004  | 5    | 34624797  | 34625568  | +    |
| 21131 | 1437118_at   | Strain | Usp7              | 252870 | 16   | 8364073   | 8389916   | -    |
| 21132 | 1443793_x_at | Strain | 1110015K06Rik     | 68510  | 5    | 138747607 | 138771977 | -    |
| 21133 | 1440699_at   | Strain | None              | None   | 1    | 66699737  | 66700337  | +    |
| 21134 | 1456922_at   | Strain | 4933437K13Rik     | 74478  | 16   | 7646332   | 7992303   | +    |
| 21135 | 1448999_at   | Strain | Trappc5           | 66682  | 8    | 3024416   | 3029159   | +    |
| 21136 | 1453402_at   | Strain | 6430500C12Rik     | 76883  | 8    | 38068592  | 38070360  | +    |
| 21137 | 1431097_at   | Strain | Garnl1            | 56784  | 12   | 52323288  | 52540884  | -    |
| 21138 | 1438062_at   | Strain | 4832420A03Rik     | 320612 | 7    | 91736186  | 91737470  | +    |
| 21139 | 1423152_at   | Strain | Vapb              | 56491  | 2    | 173198044 | 173239833 | +    |
| 21140 | 1422994_at   | Strain | Pip5k3            | 18711  | 1    | 65480863  | 65568017  | +    |
| 21141 | 1435262_at   | Strain | Pign              | 27392  | 1    | 105412403 | 105554926 | -    |
|       |              |        | Hnrpa3 ///        |        |      |           |           |      |
| 21142 | 1452774_at   | Strain | LOC545592         | 229279 | 2    | 75357026  | 75367156  | +    |
| 21143 | 1458917_at   | Strain | None              | None   | 5    | 31474465  | 31475030  | +    |
| 21144 | 1455648_at   | Strain | 6.72E+21          | 210853 | 17   | 20033048  | 20055559  | -    |
| 21145 | 1424692_at   | Strain | 2810055F11Rik     | 67217  | 12   | 68912526  | 68924411  | -    |
| 21146 | 1453399_at   | Strain | Ccnt2             | 72949  | 1    | 127616552 | 127647225 | +    |
| 21147 | 1449934_at   | Strain | Pura              | 19290  | 18   | 36504827  | 36511914  | +    |
| 21148 | 1452126_at   | Strain | Zfp160            | 224585 | 17   | 18880791  | 18900678  | +    |
| 21149 | 1435034_at   | Strain | AW060207          | 231571 | 5    | 106668184 | 106732285 | +    |
| 21150 | 1421934_at   | Strain | Cbx5              | 12419  | 15   | 103258024 | 103277308 | -    |
| 21151 | 1428286_at   | Strain | 2900097C17Rik     | 347740 | 2    | 155845002 | 155848087 | -    |
|       |              |        | 4933439C20Rik /// |        |      |           |           |      |
| 21152 | 1435425_at   | Strain | Pisd              | 236604 | 11   | 3020573   | 3026734   | +    |
| 21153 | 1418786_at   | Strain | Mapk8ip2          | 60597  | 15   | 89507005  | 89515320  | +    |
| 21154 | 1456359_at   | Strain | Ppwd1             | 238831 | 13   | 100423310 | 100447008 | -    |
| 21155 | 1424610_at   | Strain | Trub2             | 227682 | 2    | 29708273  | 29720664  | -    |
| 21156 | 1424064_at   | Strain | Rab1b             | 76308  | 19   | 4887997   | 4895786   | -    |
| 21157 | 1416446_at   | Strain | Tmem30a           | 69981  | 9    | 79974649  | 79999130  | -    |
| 21158 | 1440339_at   | Strain | 4833416E15Rik     | 73762  | 10   | 24612408  | 24612830  | -    |
| 21159 | 1450909_at   | Strain | Eif4e             | 13684  | 3    | 137416519 | 137446834 | +    |
| 21160 | 1425072_at   | Strain | Skp2              | 27401  | 15   | 8914251   | 8942170   | -    |
| 21161 | 1427142_s_at | Strain | Jarid1b           | 75605  | 1    | 134410458 | 134483140 | +    |
| 21162 | 1459167_at   | Strain | Cdc42bpb          | 217866 | 12   | 106766370 | 106850750 | -    |
| 21163 | 1418635_at   | Strain | Etv3              | 27049  | 3    | 87270684  | 87284681  | +    |
| 21164 | 1424538_at   | Strain | Ubl4              | 27643  | X    | 69028056  | 69029182  | -    |
| 21165 | 1442830_at   | Strain | Nusap1            | 108907 | 2    | 119132566 | 119163626 | +    |
| 21166 | 1437557_at   | Strain | D3Ert254e         | 52237  | 3    | 35628679  | 35630961  | +    |
| 21167 | 1454636_at   | Strain | Cbx5              | 12419  | 15   | 103258024 | 103277308 | -    |
| 21168 | 1429362_a_at | Strain | Sf3b2             | 319322 | 19   | 5062722   | 5084238   | -    |
| 21169 | 1459318_at   | Strain | Sema6d            | 214968 | 2    | 124124149 | 124181623 | +    |
| 21170 | 1447359_at   | Strain | LOC381955         | 381955 | 7    | 19761532  | 19763742  | -    |
| 21171 | 1422884_at   | Strain | Snrpd3            | 67332  | 10   | 75619782  | 75637180  | +    |
| 21172 | 1451285_at   | Strain | Fus               | 233908 | 7    | 122017364 | 122031841 | +    |
| 21173 | 1441597_at   | Strain | None              | None   | 18   | 36811993  | 36812639  | +    |
| 21174 | 1440318_at   | Strain | Wdr35             | 74682  | 12   | 8290207   | 8345162   | +    |
| 21175 | 1442951_at   | Strain | Atxn714           | 72174  | 12   | 29753981  | 29857347  | +    |
| 21176 | 1429048_at   | Strain | Bloc1s2           | 73689  | 19   | 52550788  | 52552535  | +    |
| 21177 | 1460113_at   | Strain | B930093H17Rik     | 319770 | NONE | NONE      | NONE      | NONE |
| 21178 | 1418537_at   | Strain | 0610042E07Rik     | 67441  | 7    | 4090781   | 4112002   | -    |
| 21179 | 1436890_at   | Strain | Uap111            | 227620 | 2    | 25292055  | 25297811  | -    |
| 21180 | 1456869_at   | Strain | 2210018M03Rik     | 67109  | 7    | 5326129   | 5349319   | -    |

|       |              |        |               |        |      |           |           |      |
|-------|--------------|--------|---------------|--------|------|-----------|-----------|------|
| 21181 | 1449518_at   | Strain | Qpctl         | 67369  | 7    | 16008978  | 16017957  | -    |
| 21182 | 1429894_a_at | Strain | Mtap7         | 17761  | 10   | 20157697  | 20207739  | +    |
| 21183 | 1445512_at   | Strain | None          | None   | 17   | 30051143  | 30052024  | -    |
| 21184 | 1443998_at   | Strain | None          | None   | 2    | 131503322 | 131504105 | -    |
| 21185 | 1453230_at   | Strain | Zfp74         | 72723  | 7    | 25347508  | 25366610  | -    |
|       |              |        | Hspa8 ///     |        |      |           |           |      |
|       |              |        | LOC432432 /// |        |      |           |           |      |
|       |              |        | LOC432883 /// |        |      |           |           |      |
| 21186 | 1431182_at   | Strain | LOC434047     | 15481  | 9    | 40751958  | 40756793  | +    |
| 21187 | 1451888_a_at | Strain | Odz4          | 23966  | 7    | 90212889  | 90948341  | +    |
| 21188 | 1460648_at   | Strain | Nr2f6         | 13864  | 8    | 70523955  | 70531214  | -    |
| 21189 | 1428352_at   | Strain | Arrdc2        | 70807  | 8    | 69990851  | 69995433  | -    |
| 21190 | 1429336_at   | Strain | 2610301K12Rik | 72477  | 2    | 128332164 | 128366477 | +    |
| 21191 | 1417654_at   | Strain | Sdc4          | 20971  | 2    | 163880980 | 163899921 | -    |
| 21192 | 1439411_a_at | Strain | Xpo7          | 65246  | 14   | 64979347  | 65026150  | -    |
| 21193 | 1437203_at   | Strain | None          | None   | 12   | 28060233  | 28061507  | -    |
| 21194 | 1415888_at   | Strain | Hdgf          | 15191  | 3    | 87650025  | 87659786  | +    |
| 21195 | 1439774_at   | Strain | Prrx1         | 18933  | 1    | 163163407 | 163227993 | -    |
| 21196 | 1424869_at   | Strain | BC003479      | 216820 | 11   | 60556330  | 60583788  | +    |
| 21197 | 1458692_at   | Strain | Supt3h        | 109115 | 17   | 42281336  | 42624366  | +    |
| 21198 | 1426205_at   | Strain | Ppp1cb        | 19046  | 5    | 30917485  | 30950978  | +    |
| 21199 | 1458685_at   | Strain | Garnl1        | 56784  | 12   | 52323288  | 52540884  | -    |
| 21200 | 1441604_at   | Strain | Esd           | 13885  | 14   | 69077924  | 69096025  | +    |
| 21201 | 1422675_at   | Strain | Smarce1       | 57376  | 11   | 99030134  | 99052104  | -    |
| 21202 | 1448324_at   | Strain | Rnps1         | 19826  | 17   | 22218678  | 22229480  | +    |
| 21203 | 1441142_at   | Strain | 2700081L22Rik | 72648  | 4    | 52346174  | 52355876  | -    |
| 21204 | 1424500_at   | Strain | 4732497O03Rik | 216987 | 11   | 79659615  | 79688046  | -    |
| 21205 | 1447223_at   | Strain | None          | None   | 11   | 30794442  | 30794922  | -    |
| 21206 | 1439846_at   | Strain | Klf12         | 16597  | 14   | 94399045  | 94678209  | -    |
| 21207 | 1444483_at   | Strain | 4931428D14Rik | 216618 | 11   | 29116326  | 29142062  | -    |
| 21208 | 1421133_at   | Strain | Pvr13         | 58998  | 16   | 45281022  | 45382981  | -    |
| 21209 | 1448050_s_at | Strain | Map4k4        | 26921  | 1    | 40195342  | 40319092  | +    |
| 21210 | 1434706_at   | Strain | Vcpip1        | 70675  | 1    | 9829046   | 9852904   | -    |
| 21211 | 1434208_at   | Strain | 2900057K09Rik | 108937 | 7    | 94009760  | 94013127  | -    |
| 21212 | 1445334_at   | Strain | 1700047117Rik | 73385  | 12   | 51918988  | 51936568  | +    |
| 21213 | 1449014_at   | Strain | Lactb         | 80907  | 9    | 67082765  | 67102856  | -    |
| 21214 | 1419362_at   | Strain | Mrpl35        | 66223  | 6    | 72147085  | 72155754  | -    |
| 21215 | 1422669_at   | Strain | Ebag9         | 55960  | 15   | 44565229  | 44586536  | +    |
| 21216 | 1457582_at   | Strain | Uty           | 22290  | Y    | 41346     | 184254    | +    |
| 21217 | 1423523_at   | Strain | Aass          | 30956  | 6    | 23124207  | 23184664  | -    |
| 21218 | 1434474_at   | Strain | Abca5         | 217265 | 11   | 110093339 | 110158764 | -    |
| 21219 | 1425515_at   | Strain | Pik3r1        | 18708  | 13   | 97857040  | 97865195  | -    |
| 21220 | 1441848_at   | Strain | None          | None   | 16   | 8181258   | 8321087   | +    |
| 21221 | 1415765_at   | Strain | 1110031M08Rik | 68693  | 19   | 8016414   | 8030688   | +    |
| 21222 | 1428134_at   | Strain | 2310005O14Rik | 67914  | 8    | 94122589  | 94139067  | +    |
| 21223 | 1422799_at   | Strain | Bat2          | 53761  | 17   | 32853100  | 32866823  | -    |
| 21224 | 1457884_at   | Strain | 4732496C06Rik | 319685 | 7    | 110414567 | 110415253 | +    |
| 21225 | 1425544_at   | Strain | Plekha5       | 109135 | 6    | 141327040 | 141388972 | +    |
| 21226 | 1420849_at   | Strain | Crnk1l        | 66877  | 2    | 145374418 | 145391636 | -    |
| 21227 | 1455525_at   | Strain | Endogl1       | 208194 | 9    | 119439221 | 119458491 | +    |
| 21228 | 1428921_at   | Strain | 2810021B07Rik | 66308  | 13   | 17159108  | 17162800  | +    |
| 21229 | 1459068_at   | Strain | 1110006I15Rik | 68539  | 19   | 10067157  | 10078240  | -    |
| 21230 | 1425562_s_at | Strain | Trnt1         | 70047  | 6    | 107265186 | 107278483 | +    |
| 21231 | 1435721_at   | Strain | Kcnq4         | 60613  | 4    | 119720071 | 119772048 | -    |
| 21232 | 1443387_at   | Strain | BB045044      | 99440  | NONE | NONE      | NONE      | NONE |
| 21233 | 1455182_at   | Strain | Kif1b         | 16561  | 4    | 147668683 | 147799980 | -    |
| 21234 | 1457484_at   | Strain | D930050J11    | 414326 | 11   | 115516215 | 115516948 | -    |
| 21235 | 1452584_at   | Strain | 1500032L24Rik | 69029  | 15   | 82396763  | 82399779  | +    |
| 21236 | 1429430_at   | Strain | A030012M09Rik | 319263 | 1    | 7090301   | 7142844   | +    |
| 21237 | 1455107_at   | Strain | Srpk1         | 20815  | 17   | 26391082  | 26423944  | -    |
| 21238 | 1452906_at   | Strain | Gtl2          | 17263  | 12   | 105023823 | 105039917 | +    |
| 21239 | 1445431_at   | Strain | Stk39         | 53416  | 2    | 68065847  | 68327381  | -    |
| 21240 | 1436176_at   | Strain | Syt11         | 229521 | 3    | 88489566  | 88516404  | -    |
| 21241 | 1460384_a_at | Strain | Arid4b        | 94246  | 13   | 13506342  | 13643882  | +    |
| 21242 | 1457991_at   | Strain | Abcd3         | 19299  | 3    | 120537803 | 120594108 | -    |



|       |              |        |               |        |      |           |           |      |
|-------|--------------|--------|---------------|--------|------|-----------|-----------|------|
| 21243 | 1422874_at   | Strain | Acrbp         | 54137  | 6    | 125705979 | 125719247 | +    |
| 21244 | 1428234_at   | Strain | Cpsf6         | 432508 | 10   | 117034119 | 117066391 | -    |
| 21245 | 1416156_at   | Strain | Vcl           | 22330  | 14   | 19290931  | 19398336  | +    |
| 21246 | 1445564_at   | Strain | None          | None   | 5    | 90246138  | 90246389  | -    |
| 21247 | 1428128_at   | Strain | 4921506J03Rik | 382423 | 10   | 112606837 | 112607555 | -    |
| 21248 | 1448626_at   | Strain | Cdk5rap1      | 66971  | 2    | 153792323 | 153829656 | -    |
| 21249 | 1449546_a_at | Strain | Zfp617        | 170938 | 8    | 71079283  | 71092128  | +    |
| 21250 | 1439371_x_at | Strain | Timm44        | 21856  | 8    | 3614696   | 3630853   | -    |
| 21251 | 1431948_a_at | Strain | Pank2         | 74450  | 2    | 130776353 | 130810544 | +    |
| 21252 | 1429832_at   | Strain | Ppib          | 66101  | 4    | 118258916 | 118279389 | -    |
| 21253 | 1424738_at   | Strain | 4932432K03Rik | 74385  | 14   | 44155313  | 44176487  | +    |
| 21254 | 1444188_at   | Strain | None          | None   | 4    | 128877553 | 128878090 | +    |
| 21255 | 1459001_at   | Strain | Vps33a        | 77573  | 5    | 122700612 | 122742738 | -    |
| 21256 | 1430763_at   | Strain | 4930563E22Rik | 75304  | 11   | 71940830  | 71944102  | +    |
| 21257 | 1452611_at   | Strain | Zfp294        | 78913  | 16   | 86525259  | 86582064  | -    |
| 21258 | 1451408_at   | Strain | Trub2         | 227682 | 2    | 29708273  | 29720664  | -    |
| 21259 | 1422040_at   | Strain | Sema7a        | 20361  | 9    | 58054059  | 58076850  | +    |
| 21260 | 1437649_x_at | Strain | Ppib          | 19035  | 9    | 66145681  | 66189949  | +    |
| 21261 | 1433205_at   | Strain | 2810436B12Rik | 72762  | 14   | 99801699  | 99802907  | +    |
| 21262 | 1432304_a_at | Strain | 9030624J02Rik | 71517  | 7    | 112616598 | 112717342 | +    |
| 21263 | 1457426_at   | Strain | 1700048O20Rik | 69430  | NONE | NONE      | NONE      | NONE |
| 21264 | 1423320_at   | Strain | Dnase1l2      | 66705  | 17   | 22244150  | 22246669  | -    |
| 21265 | 1428198_at   | Strain | 4930578F03Rik | 75894  | 2    | 120654277 | 120670529 | +    |
| 21266 | 1460486_at   | Strain | Rabgap1       | 227800 | 2    | 37375531  | 37441301  | +    |
| 21267 | 1426370_at   | Strain | Mlstd2        | 67420  | 7    | 107366377 | 107420898 | +    |
| 21268 | 1452614_at   | Strain | Gm566         | 229672 | 3    | 103259992 | 103266043 | +    |
| 21269 | 1456047_at   | Strain | Pla2g4b       | 211429 | 2    | 119547266 | 119555814 | +    |
| 21270 | 1431676_x_at | Strain | Gtf2i         | 14886  | 5    | 133529235 | 133606084 | -    |
| 21271 | 1457498_at   | Strain | Man2a2        | 140481 | 7    | 74160715  | 74171123  | -    |
| 21272 | 1419950_s_at | Strain | Tnpo3         | 320938 | 6    | 29587924  | 29656704  | -    |
| 21273 | 1427583_at   | Strain | 4921505C17Rik | 78757  | 15   | 6496946   | 6588954   | +    |
| 21274 | 1446443_at   | Strain | B230213L16Rik | 320943 | 1    | 38310325  | 38310986  | +    |
| 21275 | 1429296_at   | Strain | Rab10         | 19325  | 12   | 3108      | 12388     | -    |
| 21276 | 1443314_at   | Strain | 2410042D21Rik | 72425  | 2    | 112002449 | 112037475 | +    |
| 21277 | 1447263_at   | Strain | Metap2        | 56307  | 10   | 93834268  | 93863130  | -    |
| 21278 | 1416708_a_at | Strain | D7Bwg0611e    | 52857  | 7    | 26540708  | 26555116  | -    |
| 21279 | 1428860_at   | Strain | 4930572J05Rik | 223626 | 15   | 74752896  | 74756035  | +    |
| 21280 | 1434612_s_at | Strain | Sbno1         | 243272 | 5    | 123544504 | 123597297 | -    |
| 21281 | 1458798_at   | Strain | None          | None   | 17   | 44384370  | 44384855  | -    |
| 21282 | 1436022_at   | Strain | Endogl1       | 208194 | 9    | 119439221 | 119458491 | +    |
| 21283 | 1448597_at   | Strain | Cstf1         | 67337  | 2    | 171879736 | 171889819 | +    |
| 21284 | 1458704_at   | Strain | None          | None   | NONE | NONE      | NONE      | NONE |
| 21285 | 1442675_at   | Strain | Fancc         | 14088  | 13   | 60694745  | 60814715  | -    |
| 21286 | 1434884_at   | Strain | Mtdh          | 67154  | 15   | 34082454  | 34141052  | +    |
| 21287 | 1444749_at   | Strain | Apod          | 11815  | 16   | 30106394  | 30123724  | -    |
| 21288 | 1454924_at   | Strain | Fut10         | 171167 | 8    | 29970150  | 30020391  | +    |
| 21289 | 1430984_at   | Strain | Azin1         | 54375  | 15   | 38492445  | 38524417  | -    |
| 21290 | 1428052_a_at | Strain | Zmym1         | 68310  | 4    | 126074207 | 126088245 | -    |
| 21291 | 1460099_at   | Strain | Atp9b         | 50771  | 18   | 80858429  | 81057410  | -    |
| 21292 | 1458370_at   | Strain | Bmp2k         | 140780 | 5    | 96015785  | 96109144  | +    |
| 21293 | 1424277_at   | Strain | 1110020L19Rik | 73738  | X    | 68097970  | 68119684  | -    |
| 21294 | 1449250_at   | Strain | Prcc          | 94315  | 3    | 87604018  | 87630364  | -    |
| 21295 | 1426575_at   | Strain | Tmem23        | 208449 | 19   | 31448202  | 31573509  | -    |
| 21296 | 1457005_at   | Strain | None          | None   | NONE | NONE      | NONE      | NONE |
| 21297 | 1430520_at   | Strain | Cpne8         | 66871  | 15   | 90540437  | 90732329  | -    |
| 21298 | 1418894_s_at | Strain | Pbx2          | 18515  | 17   | 32293780  | 32299792  | +    |
| 21299 | 1455006_at   | Strain | 2310016M24Rik | 66379  | 15   | 99782863  | 99785330  | +    |
| 21300 | 1448622_at   | Strain | Lsm4          | 50783  | 8    | 69829740  | 69835099  | +    |
| 21301 | 1421533_at   | Strain | Slc7a1        | 11987  | 5    | 147223681 | 147291421 | -    |
| 21302 | 1448782_at   | Strain | Txndc11       | 106200 | 16   | 10508059  | 10567680  | +    |
| 21303 | 1455474_at   | Strain | D6Wsu116e     | 28006  | 6    | 116645592 | 116700200 | +    |
| 21304 | 1459950_at   | Strain | 6330415M09Rik | 70762  | 3    | 86530542  | 86665241  | -    |
| 21305 | 1443379_at   | Strain | A430033K04    | 243308 | 5    | 137594368 | 137620231 | +    |
| 21306 | 1428697_at   | Strain | Dpp8          | 74388  | 9    | 65154659  | 65204852  | +    |
| 21307 | 1446982_at   | Strain | None          | None   | 8    | 126821262 | 126821828 | +    |

|       |              |        |               |        |    |           |           |   |
|-------|--------------|--------|---------------|--------|----|-----------|-----------|---|
| 21308 | 1430918_at   | Strain | 38414         | 320253 | 18 | 56982085  | 57143467  | - |
| 21309 | 1450903_at   | Strain | Rad23b        | 19359  | 4  | 55265936  | 55307091  | + |
| 21310 | 1453207_at   | Strain | LOC554362     | 554362 | 8  | 23373351  | 23375971  | + |
| 21311 | 1445717_at   | Strain | E130108L08Rik | 78000  | 6  | 38734229  | 38735401  | + |
| 21312 | 1424863_a_at | Strain | Hipk2         | 15258  | 6  | 38834084  | 39012133  | - |
| 21313 | 1440925_at   | Strain | Rhoq          | 104215 | 17 | 84819915  | 84856873  | + |
| 21314 | 1429684_at   | Strain | 5830472M02Rik | 76080  | 2  | 163059320 | 163074164 | + |
|       |              |        | Gnpda1 ///    |        |    |           |           |   |
| 21315 | 1448163_at   | Strain | LOC231914     | 231914 | 5  | 148052836 | 148073109 | - |
| 21316 | 1433748_at   | Strain | Zdhhc18       | 503610 | 4  | 132567633 | 132594023 | - |
| 21317 | 1450102_a_at | Strain | Amfr          | 23802  | 8  | 93256098  | 93297014  | - |
| 21318 | 1419133_at   | Strain | Evpl          | 14027  | 11 | 116041848 | 116059090 | - |
| 21319 | 1451513_x_at | Strain | Serpina1b     | 20701  | 12 | 99172098  | 99219702  | - |
| 21320 | 1446490_at   | Strain | Ptbp2         | 56195  | 3  | 118493626 | 118557890 | - |
| 21321 | 1429680_at   | Strain | 1500010G04Rik | 68965  | 6  | 49394626  | 49398413  | - |
| 21322 | 1451399_at   | Strain | MGI:1930773   | 56695  | 1  | 74587397  | 74662104  | + |
| 21323 | 1424541_at   | Strain | 1110020A09Rik | 70397  | 1  | 16850492  | 16863658  | + |
| 21324 | 1456386_at   | Strain | Rnpc2         | 170791 | 2  | 155604575 | 155637077 | - |
| 21325 | 1455763_at   | Strain | Rnf41         | 67588  | 10 | 128148476 | 128178259 | + |
| 21326 | 1421346_a_at | Strain | Slc6a6        | 21366  | 6  | 92133220  | 92208188  | + |
| 21327 | 1434207_at   | Strain | 2900057K09Rik | 108937 | 7  | 94009760  | 94013127  | - |
|       |              |        | LOC545705 /// |        |    |           |           |   |
| 21328 | 1451477_at   | Strain | LOC545706     | 545705 | 4  | 144696792 | 144745191 | + |
| 21329 | 1437544_at   | Strain | Fubp1         | 51886  | 3  | 151191900 | 151214173 | + |
| 21330 | 1437767_s_at | Strain | Fts           | 14339  | 8  | 90409865  | 90421862  | - |
| 21331 | 1426579_at   | Strain | Gnl2          | 230737 | 4  | 124057151 | 124082485 | + |
| 21332 | 1419972_at   | Strain | None          | None   | 16 | 44024318  | 44024890  | + |
| 21333 | 1456896_at   | Strain | 6720462K09Rik | 399579 | 4  | 147747513 | 147748160 | - |
| 21334 | 1426011_a_at | Strain | Ggnbp2        | 217039 | 11 | 84560721  | 84598730  | - |
| 21335 | 1422849_a_at | Strain | Pabpn1        | 54196  | 14 | 49410993  | 49414893  | + |
| 21336 | 1428426_s_at | Strain | Tgfbrap1      | 73122  | 1  | 43341936  | 43348292  | - |
| 21337 | 1423971_at   | Strain | Thoc3         | 73666  | 13 | 53069551  | 53078853  | - |
| 21338 | 1438326_at   | Strain | 3300001M20Rik | 66926  | 2  | 132318068 | 132329908 | - |
| 21339 | 1427037_at   | Strain | Eif4g1        | 208643 | 16 | 19444890  | 19465024  | + |
| 21340 | 1419138_at   | Strain | B3gal4        | 54218  | 17 | 31653655  | 31655222  | - |
| 21341 | 1442681_at   | Strain | AU067695      | 381802 | 6  | 115981750 | 116015764 | + |
| 21342 | 1418012_at   | Strain | Sh3glb1       | 54673  | 3  | 143660519 | 143691998 | - |
| 21343 | 1439216_at   | Strain | 1500004F05Rik | 69765  | 8  | 39304569  | 39305148  | + |
| 21344 | 1430718_s_at | Strain | Zcsl3         | 99349  | 2  | 105671471 | 105708303 | - |
| 21345 | 1429528_at   | Strain | Rae1          | 66679  | 2  | 172460604 | 172476199 | + |
| 21346 | 1457447_at   | Strain | Rb1           | 19645  | 14 | 67546936  | 67677175  | - |
| 21347 | 1416779_at   | Strain | Sdpr          | 20324  | 1  | 51590070  | 51603904  | + |
| 21348 | 1421376_at   | Strain | Traf6         | 22034  | 2  | 101383123 | 101405659 | + |
| 21349 | 1427279_at   | Strain | Rsnl2         | 78785  | 17 | 69558453  | 69633262  | + |
| 21350 | 1425014_at   | Strain | Nr2c2         | 22026  | 6  | 92539374  | 92616647  | + |
| 21351 | 1426371_at   | Strain | Mlst2         | 67420  | 7  | 107366377 | 107420898 | + |
| 21352 | 1454985_at   | Strain | D030051N19Rik | 228361 | 2  | 91434974  | 91623598  | + |
| 21353 | 1451727_at   | Strain | D11ErtD730e   | 193116 | 11 | 43186568  | 43200818  | + |
| 21354 | 1446968_at   | Strain | Picalm        | 233489 | 7  | 84121344  | 84258493  | + |
|       |              |        | Polb ///      |        |    |           |           |   |
| 21355 | 1434230_at   | Strain | A430088C08Rik | 18970  | 8  | 21382844  | 21407993  | - |
| 21356 | 1442543_at   | Strain | Tex264        | 21767  | 9  | 106724534 | 106751448 | - |
| 21357 | 1426191_a_at | Strain | Bcl2l1        | 12048  | 2  | 152237604 | 152288618 | - |
| 21358 | 1417427_at   | Strain | 1500026D16Rik | 68209  | 19 | 5390675   | 5391722   | + |
| 21359 | 1450434_s_at | Strain | Pcyt1a        | 13026  | 16 | 31261076  | 31281386  | + |
| 21360 | 1456420_at   | Strain | Arid4a        | 238247 | 12 | 67850998  | 67933600  | + |
| 21361 | 1451809_s_at | Strain | Rwdd3         | 73170  | 3  | 119937535 | 119953364 | - |
| 21362 | 1443969_at   | Strain | Irs2          | 384783 | 8  | 10358726  | 10476803  | - |
| 21363 | 1440835_at   | Strain | Zfp27         | 22689  | 7  | 25308433  | 25321249  | - |
| 21364 | 1454913_at   | Strain | None          | None   | 4  | 123971225 | 123971775 | + |
| 21365 | 1428612_at   | Strain | Atg7l         | 74244  | 6  | 115108368 | 115295327 | + |
| 21366 | 1457096_at   | Strain | 6430520M22Rik | 319716 | 6  | 146791203 | 146792072 | - |
| 21367 | 1429688_at   | Strain | Arntl2        | 272322 | 6  | 147726463 | 147759658 | + |
| 21368 | 1426839_at   | Strain | Pold3         | 67967  | 7  | 94188784  | 94228172  | - |
| 21369 | 1416549_at   | Strain | Slc35b4       | 58246  | 6  | 34249834  | 34271009  | - |

|       |              |        |                |        |    |           |           |   |
|-------|--------------|--------|----------------|--------|----|-----------|-----------|---|
| 21370 | 1455222_a_at | Strain | Ubp1           | 22221  | 9  | 113984479 | 114029010 | + |
| 21371 | 1452837_at   | Strain | Lpin2          | 64898  | 17 | 68977342  | 69020903  | + |
| 21372 | 1442834_at   | Strain | None           | None   | 6  | 101329801 | 101331429 | + |
| 21373 | 1444430_at   | Strain | Armc8          | 74125  | 9  | 99381642  | 99469875  | - |
| 21374 | 1457709_a_at | Strain | A930005H10Rik  | 68161  | 3  | 114652097 | 114658964 | - |
| 21375 | 1437353_at   | Strain | BC035291       | 208043 | 5  | 122317613 | 122323666 | + |
| 21376 | 1431259_at   | Strain | None           | None   | 2  | 120671393 | 120673288 | - |
| 21377 | 1459226_at   | Strain | None           | None   | 15 | 34144654  | 34145103  | + |
| 21378 | 1443378_s_at | Strain | Adam1a         | 280668 | 5  | 120670410 | 120673501 | - |
| 21379 | 1451330_a_at | Strain | Inpp5b         | 16330  | 4  | 123768991 | 123828624 | + |
| 21380 | 1424715_at   | Strain | 0610039N19Rik  | 67442  | 6  | 72932145  | 72940919  | + |
| 21381 | 1420845_at   | Strain | Mrps2          | 118451 | 2  | 28400228  | 28403339  | + |
| 21382 | 1448207_at   | Strain | Lasp1          | 16796  | 11 | 97620759  | 97659851  | + |
| 21383 | 1457639_at   | Strain | Atp6v1h        | 108664 | 1  | 5048448   | 5126164   | + |
| 21384 | 1421284_at   | Strain | Pign           | 27392  | 1  | 105412403 | 105554926 | - |
| 21385 | 1433574_at   | Strain | Cdc37l1        | 67072  | 19 | 28243091  | 28270166  | + |
| 21386 | 1440014_at   | Strain | Pacs1          | 107975 | 19 | 4922475   | 5061909   | - |
| 21387 | 1453195_at   | Strain | Sdccag3        | 68112  | 2  | 26315523  | 26321468  | - |
| 21388 | 1425097_a_at | Strain | Zfp106         | 20402  | 2  | 120023462 | 120077639 | - |
| 21389 | 1433804_at   | Strain | Jak1           | 16451  | 4  | 100111937 | 100224138 | - |
| 21390 | 1427283_at   | Strain | Mll            | 214162 | 9  | 44793512  | 44870129  | - |
| 21391 | 1453108_at   | Strain | 2810429K17Rik  | 77041  | 13 | 72117991  | 72155720  | - |
| 21392 | 1421495_a_at | Strain | 1700052N19Rik  | 73419  | 10 | 6064884   | 6072237   | - |
| 21393 | 1451386_at   | Strain | Blvrb          | 233016 | 7  | 22823535  | 22841923  | + |
| 21394 | 1418365_at   | Strain | Ctsh           | 13036  | 9  | 89942041  | 89963703  | + |
| 21395 | 1431067_at   | Strain | 6330404A07Rik  | 70754  | 4  | 106093067 | 106094126 | - |
| 21396 | 1415806_at   | Strain | Plat           | 18791  | 8  | 21512347  | 21537423  | + |
| 21397 | 1435295_at   | Strain | D9Erttd809e    | 320615 | 9  | 86810919  | 86864199  | + |
| 21398 | 1420703_at   | Strain | Csf2ra         | 12982  | 11 | 15        | 635       | + |
| 21399 | 1459956_at   | Strain | Dock10         | 210293 | 1  | 80833085  | 80997044  | - |
| 21400 | 1458298_at   | Strain | Cadps          | 27062  | 14 | 10830082  | 11279704  | - |
| 21401 | 1418185_at   | Strain | 4733401H18Rik  | 66706  | 9  | 108614863 | 108616340 | - |
| 21402 | 1453380_a_at | Strain | 2410012H02Rik  | 68876  | 10 | 126601326 | 126634251 | - |
| 21403 | 1419382_a_at | Strain | Dhrs4          | 28200  | 14 | 49995929  | 50005102  | + |
| 21404 | 1453265_at   | Strain | 4930579C15Rik  | 67753  | 4  | 93882365  | 93903882  | - |
| 21405 | 1459583_at   | Strain | Grip1          | 74053  | 10 | 119395694 | 119653294 | + |
| 21406 | 1438425_at   | Strain | Gtf3c1         | 233863 | 7  | 119690685 | 119757419 | - |
| 21407 | 1435802_at   | Strain | Gm157          | 232879 | 7  | 10999345  | 11013464  | - |
| 21408 | 1435904_at   | Strain | Eif2c3         | 214150 | 4  | 125372498 | 125456507 | - |
| 21409 | 1428046_a_at | Strain | Zfx            | 22764  | X  | 88735290  | 88783558  | - |
| 21410 | 1440292_at   | Strain | D13Erttd666e   | 52695  | 13 | 61643018  | 61643849  | - |
| 21411 | 1425044_at   | Strain | Kcnj6          | 16522  | 16 | 94170119  | 94405052  | - |
| 21412 | 1450537_at   | Strain | Mid2           | 23947  | X  | 134209895 | 134312655 | + |
| 21413 | 1453988_a_at | Strain | Ide            | 15925  | 19 | 36613620  | 36677821  | - |
| 21414 | 1452719_at   | Strain | Zdhhc24        | 70605  | 19 | 4667494   | 4673298   | + |
| 21415 | 1458002_at   | Strain | Mapk10         | 26414  | 5  | 101946583 | 102247027 | - |
| 21416 | 1425461_at   | Strain | Fbxw11         | 103583 | 11 | 32537669  | 32641610  | + |
| 21417 | 1452111_at   | Strain | Mrps35         | 232536 | 6  | 147969392 | 147997627 | + |
| 21418 | 1436547_at   | Strain | None           | None   | 11 | 88860304  | 88861610  | - |
| 21419 | 1457934_at   | Strain | Rbm12          | 75710  | 2  | 155551819 | 155568864 | - |
| 21420 | 1433736_at   | Strain | Hcfc1          | 15161  | X  | 68603450  | 68626970  | - |
| 21421 | 1421903_at   | Strain | Ixl            | 67224  | 7  | 23791956  | 23798275  | - |
|       |              |        | Psmb3 ///      |        |    |           |           |   |
| 21422 | 1460198_a_at | Strain | LOC240289      | 240289 | 18 | 52080386  | 52081047  | - |
| 21423 | 1423163_at   | Strain | Bat4           | 81845  | 17 | 32826733  | 32828587  | + |
| 21424 | 1416991_at   | Strain | Mto1           | 68291  | 9  | 78648099  | 78674470  | + |
| 21425 | 1438110_at   | Strain | Zbtb1          | 268564 | 12 | 73226354  | 73244538  | + |
| 21426 | 1452185_at   | Strain | Ipo8           | 320727 | 6  | 149706566 | 149767322 | - |
|       |              |        | B430201F14 /// |        |    |           |           |   |
| 21427 | 1458405_at   | Strain | LOC546946      | 330503 | 7  | 25592926  | 25593902  | + |
| 21428 | 1443241_at   | Strain | C330017I15Rik  | 78697  | 5  | 22205737  | 22247905  | - |
| 21429 | 1450100_a_at | Strain | Tcerg1         | 56070  | 18 | 42732154  | 42795475  | + |
| 21430 | 1418250_at   | Strain | Arfl4          | 66182  | 11 | 101486648 | 101488916 | + |
| 21431 | 1457562_at   | Strain | Rps6kb1        | 72508  | 11 | 86241975  | 86272766  | - |
| 21432 | 1447960_at   | Strain | 9630017O17     | 331021 | 9  | 105390892 | 105392738 | + |

|       |              |        |               |        |    |           |           |   |
|-------|--------------|--------|---------------|--------|----|-----------|-----------|---|
| 21433 | 1458057_at   | Strain | Cald1         | 109624 | 6  | 34803747  | 34868362  | + |
| 21434 | 1424545_at   | Strain | BC003965      | 214489 | 17 | 22990107  | 22993259  | + |
| 21435 | 1455681_at   | Strain | Zfp369        | 170936 | 13 | 62709247  | 62728187  | + |
| 21436 | 1439196_at   | Strain | Hook3         | 320191 | 8  | 24756639  | 24843763  | - |
| 21437 | 1431050_at   | Strain | Rps6ka5       | 73086  | 12 | 95995143  | 96170417  | - |
| 21438 | 1435915_at   | Strain | Jmjd4         | 194952 | 11 | 59175717  | 59183697  | + |
| 21439 | 1441543_at   | Strain | Eya3          | 14050  | 4  | 131599945 | 131685662 | + |
| 21440 | 1456827_at   | Strain | AA987161      | 380856 | 13 | 64191293  | 64211253  | - |
| 21441 | 1443857_at   | Strain | Hook3         | 320191 | 8  | 24756639  | 24843763  | - |
| 21442 | 1430167_a_at | Strain | Rwdd3         | 73170  | 3  | 119937535 | 119953364 | - |
| 21443 | 1450747_at   | Strain | Keap1         | 50868  | 9  | 21116332  | 21125078  | - |
| 21444 | 1444012_at   | Strain | Yipf3         | 28064  | 17 | 43758020  | 43761938  | + |
| 21445 | 1433550_at   | Strain | Chfr          | 231600 | 5  | 109186644 | 109222753 | + |
| 21446 | 1456855_at   | Strain | None          | None   | 7  | 94045303  | 94045640  | - |
| 21447 | 1452793_at   | Strain | Dzip1         | 66573  | 14 | 113431542 | 113479731 | - |
| 21448 | 1436331_at   | Strain | Vps13d        | 230895 | 4  | 143890039 | 144036650 | - |
| 21449 | 1430578_at   | Strain | Eif4g3        | 230861 | 4  | 136874731 | 137087744 | + |
| 21450 | 1417831_at   | Strain | Smc11         | 24061  | X  | 145550823 | 145596362 | + |
| 21451 | 1416272_at   | Strain | Map2k1ip1     | 56692  | 3  | 136807484 | 136817691 | + |
| 21452 | 1436943_at   | Strain | 9330151E16Rik | 192986 | 11 | 72502890  | 72504168  | - |
| 21453 | 1436519_a_at | Strain | 1110057K04Rik | 68832  | 12 | 7453506   | 7531135   | + |
| 21454 | 1427490_at   | Strain | Abcb7         | 11306  | X  | 98882022  | 99015261  | - |
| 21455 | 1444414_at   | Strain | Apod          | 11815  | 16 | 30106394  | 30123724  | - |
| 21456 | 1417243_at   | Strain | 2310065K24Rik | 102122 | 8  | 93858310  | 93885851  | - |
| 21457 | 1424540_at   | Strain | Hipk1         | 15257  | 3  | 103171062 | 103218570 | - |
| 21458 | 1456839_at   | Strain | A930008A22Rik | 235283 | 9  | 40248196  | 40406053  | - |
| 21459 | 1454201_a_at | Strain | 5730405I09Rik | 67974  | 18 | 9356614   | 9490220   | - |
| 21460 | 1416819_at   | Strain | Cdc37         | 12539  | 9  | 21022051  | 21033416  | - |
| 21461 | 1416475_at   | Strain | Ube2d2        | 56550  | 18 | 35995272  | 36030828  | + |
| 21462 | 1424381_at   | Strain | Sf4           | 70616  | 8  | 69194933  | 69224824  | + |
| 21463 | 1426583_at   | Strain | Atf2          | 11909  | 2  | 73516345  | 73590377  | - |
| 21464 | 1419398_a_at | Strain | Dp1           | 13476  | 18 | 34567907  | 34596351  | - |
| 21465 | 1437676_at   | Strain | Spag9         | 70834  | 11 | 93817190  | 93944505  | + |
| 21466 | 1445123_at   | Strain | Cbx1          | 12412  | 11 | 96610246  | 96629727  | + |
| 21467 | 1459674_at   | Strain | Prkcb1        | 18751  | 7  | 116167155 | 116506625 | + |
| 21468 | 1455215_at   | Strain | C530028O21Rik | 319352 | 6  | 125652724 | 125659098 | + |
| 21469 | 1423713_at   | Strain | Abcb8         | 74610  | 5  | 22857593  | 22873844  | + |
| 21470 | 1429775_a_at | Strain | Tm7sf1        | 83924  | 13 | 12777506  | 12812482  | - |
| 21471 | 1443222_at   | Strain | Akt3          | 23797  | 1  | 176955410 | 177064396 | - |
| 21472 | 1458567_at   | Strain | D130017N08Rik | 320064 | 5  | 142826713 | 142827569 | + |
| 21473 | 1436006_at   | Strain | Eif2ak1       | 15467  | 5  | 142939806 | 142944198 | + |
| 21474 | 1453830_at   | Strain | None          | None   | 7  | 83971856  | 83972840  | + |
| 21475 | 1457483_at   | Strain | None          | None   | 10 | 68276214  | 68276914  | - |
| 21476 | 1439035_at   | Strain | Zfp322a       | 218100 | 13 | 22835406  | 22849233  | - |
| 21477 | 1434349_at   | Strain | Vars2l        | 68915  | 17 | 33372705  | 33383911  | - |
| 21478 | 1428011_a_at | Strain | Erbp2ip       | 59079  | 13 | 100037161 | 100140118 | - |
| 21479 | 1457293_at   | Strain | Zbtb4         | 75580  | 11 | 69492223  | 69505059  | + |
| 21480 | 1439770_at   | Strain | 6430598A04Rik | 243300 | 5  | 136681548 | 136690598 | - |
| 21481 | 1428906_at   | Strain | D17Wsu155e    | 66467  | 17 | 5986238   | 5991852   | + |
| 21482 | 1444705_at   | Strain | App           | 11820  | 16 | 84062547  | 84281536  | - |
| 21483 | 1431985_at   | Strain | 2210010B09Rik | 244721 | 9  | 20454212  | 20467883  | + |
| 21484 | 1443236_at   | Strain | B230118H07Rik | 68170  | 2  | 101265464 | 101333669 | - |
| 21485 | 1420651_at   | Strain | Ate1          | 11907  | 7  | 124514765 | 124642811 | - |
| 21486 | 1427743_at   | Strain | Gm672         | 269037 | 18 | 75666390  | 75932739  | - |
| 21487 | 1430271_x_at | Strain | 4930553M18Rik | 75316  | 9  | 15143402  | 15154138  | + |
| 21488 | 1451684_a_at | Strain | Bicd1         | 12121  | 6  | 4102      | 11525     | + |
| 21489 | 1415796_at   | Strain | Dazap2        | 23994  | 15 | 100673200 | 100678299 | + |
| 21490 | 1420989_at   | Strain | 4933411K20Rik | 66756  | 8  | 45112900  | 45139459  | + |
| 21491 | 1442142_at   | Strain | 2700050L05Rik | 214764 | 7  | 128005358 | 128040623 | + |
| 21492 | 1455911_x_at | Strain | Ndufb11       | 104130 | X  | 18854266  | 18856494  | - |
| 21493 | 1426368_at   | Strain | LOC547368     | 547368 | 2  | 14042     | 56936     | + |
| 21494 | 1457805_at   | Strain | None          | None   | 13 | 8789786   | 8790211   | + |
| 21495 | 1443762_s_at | Strain | Mttr13        | 319934 | 7  | 104160882 | 104472741 | - |
| 21496 | 1457492_at   | Strain | None          | None   | 15 | 27826114  | 27826821  | - |
| 21497 | 1422769_at   | Strain | Syncrip       | 56403  | 9  | 88814754  | 88842894  | - |

|       |              |        |               |        |      |           |           |      |
|-------|--------------|--------|---------------|--------|------|-----------|-----------|------|
| 21498 | 1420227_at   | Strain | Hoxa4         | 15401  | 6    | 52333394  | 52335114  | -    |
| 21499 | 1434818_at   | Strain | 9330159K06    | 327812 | NONE | NONE      | NONE      | NONE |
| 21500 | 1438345_at   | Strain | None          | None   | 17   | 77679557  | 77680194  | -    |
| 21501 | 1417955_at   | Strain | 2600016J21Rik | 72454  | 9    | 108530195 | 108535186 | +    |
| 21502 | 1416661_at   | Strain | Eif3s10       | 13669  | 19   | 60361493  | 60391011  | -    |
| 21503 | 1449910_at   | Strain | 2210418O10Rik | 76958  | 2    | 176402416 | 176414564 | -    |
| 21504 | 1444724_at   | Strain | None          | None   | 14   | 88189357  | 88190260  | -    |
| 21505 | 1420829_a_at | Strain | Ywhaq         | 22630  | 12   | 18728420  | 18754333  | +    |
| 21506 | 1426633_s_at | Strain | Kctd14        | 233529 | 7    | 91499475  | 91504764  | +    |
| 21507 | 1443755_at   | Strain | None          | None   | NONE | NONE      | NONE      | NONE |
| 21508 | 1435540_at   | Strain | Irgq1         | 210146 | 7    | 19706649  | 19714490  | +    |
| 21509 | 1457122_at   | Strain | None          | None   | 2    | 48903598  | 48904235  | +    |
| 21510 | 1424681_a_at | Strain | Psma5         | 26442  | 3    | 108052953 | 108075715 | +    |
| 21511 | 1422718_at   | Strain | Ap3s2         | 11778  | 7    | 73672386  | 73717617  | -    |
| 21512 | 1427559_a_at | Strain | Atf2          | 11909  | 2    | 73516345  | 73590377  | -    |
| 21513 | 1446312_at   | Strain | None          | None   | 5    | 116901974 | 116902649 | +    |
| 21514 | 1426932_at   | Strain | D19Bwg1357e   | 52874  | 19   | 26629949  | 26669888  | -    |
| 21515 | 1459354_at   | Strain | Siat10        | 54613  | 16   | 57459955  | 57512884  | -    |
| 21516 | 1420972_at   | Strain | Arid5b        | 71371  | 10   | 68150685  | 68334013  | -    |
| 21517 | 1447449_at   | Strain | None          | None   | 5    | 41989237  | 41989637  | +    |
| 21518 | 1458700_at   | Strain | E430036I04Rik | 100604 | 5    | 104581541 | 104671026 | +    |
| 21519 | 1441721_at   | Strain | None          | None   | 5    | 127619155 | 127619848 | +    |
| 21520 | 1460285_at   | Strain | Itga9         | 104099 | 9    | 118602968 | 118893288 | +    |
| 21521 | 1452171_at   | Strain | Grwd1         | 101612 | 7    | 39909985  | 39915506  | -    |
| 21522 | 1444030_at   | Strain | Dcp1b         | 319618 | 6    | 119607529 | 119653880 | +    |
| 21523 | 1448047_at   | Strain | None          | None   | 1    | 181042998 | 181044100 | -    |
| 21524 | 1452887_at   | Strain | Traf3ip1      | 74019  | 1    | 91320407  | 91356416  | +    |
| 21525 | 1446155_at   | Strain | 2700089E24Rik | 381820 | 6    | 133875346 | 133882217 | +    |
| 21526 | 1429385_at   | Strain | Wdr68         | 71833  | 11   | 105857961 | 105876453 | +    |
| 21527 | 1454314_at   | Strain | 1700031K17Rik | 73343  | 4    | 42497298  | 42498204  | +    |
| 21528 | 1458522_at   | Strain | 1810011K17Rik | 226591 | 1    | 165134760 | 165159417 | -    |
| 21529 | 1437997_x_at | Strain | Mrpl48        | 52443  | 7    | 94655385  | 94714672  | -    |
| 21530 | 1435459_at   | Strain | Fmo2          | 55990  | 1    | 162784360 | 162808025 | -    |
| 21531 | 1446081_at   | Strain | Zzef1         | 195018 | 11   | 72599528  | 72652778  | +    |
| 21532 | 1428365_a_at | Strain | Prss15        | 74142  | 17   | 54302752  | 54315339  | -    |
| 21533 | 1426753_at   | Strain | Phf17         | 269424 | 3    | 41010564  | 41046427  | +    |
| 21534 | 1428656_at   | Strain | Rnasen        | 14000  | 15   | 12641215  | 12742571  | +    |
| 21535 | 1417549_at   | Strain | Zfp68         | 24135  | 5    | 137577594 | 137591201 | -    |
| 21536 | 1456157_at   | Strain | None          | None   | NONE | NONE      | NONE      | NONE |
| 21537 | 1422877_at   | Strain | Pcdhb12       | 93883  | 18   | 37659525  | 37661894  | +    |
| 21538 | 1455658_at   | Strain | Cggbp1        | 106143 | 16   | 63876856  | 63884262  | +    |
| 21539 | 1442409_at   | Strain | D9Wsu90e      | 27962  | 9    | 78113701  | 78114479  | +    |
| 21540 | 1449039_a_at | Strain | Hnrpd1        | 50926  | 5    | 99053360  | 99057516  | -    |
|       |              |        | Trappc6b ///  |        |      |           |           |      |
| 21541 | 1428177_at   | Strain | LOC433458     | 433458 | 2    | 103523252 | 103528952 | -    |
| 21542 | 1456374_x_at | Strain | Eif3s8        | 56347  | 7    | 120596642 | 120616097 | -    |
| 21543 | 1447171_at   | Strain | None          | None   | 18   | 65146079  | 65146574  | +    |
| 21544 | 1427933_at   | Strain | Vps33b        | 233405 | 7    | 74069720  | 74091665  | +    |
| 21545 | 1441057_at   | Strain | Myh10         | 77579  | 11   | 68417625  | 68542200  | +    |
| 21546 | 1445362_at   | Strain | AW456874      | 218232 | 13   | 48175930  | 48223631  | -    |
| 21547 | 1450777_at   | Strain | Xrn2          | 24128  | 2    | 146470058 | 146532016 | +    |
| 21548 | 1440761_at   | Strain | None          | None   | 13   | 87844762  | 87845158  | -    |
| 21549 | 1431935_at   | Strain | Lias          | 79464  | 5    | 64193326  | 64211036  | +    |
| 21550 | 1417912_at   | Strain | 0610009E20Rik | 66048  | 11   | 72901191  | 72902695  | -    |
| 21551 | 1429781_s_at | Strain | D3Erd789e     | 51938  | 3    | 33256108  | 33288047  | -    |
| 21552 | 1421873_s_at | Strain | Rab24         | 19336  | 13   | 53928673  | 53930803  | -    |
| 21553 | 1433848_at   | Strain | Cdc27         | 217232 | 11   | 104326687 | 104371504 | -    |
| 21554 | 1442404_at   | Strain | Ncl           | 17975  | 1    | 86155962  | 86165711  | -    |
| 21555 | 1434956_at   | Strain | None          | None   | 7    | 21409170  | 21410373  | +    |
| 21556 | 1431608_at   | Strain | Als2          | 74018  | 1    | 59468051  | 59542338  | -    |
| 21557 | 1453471_at   | Strain | 4833421E05Rik | 67732  | 12   | 18821943  | 18829156  | -    |
| 21558 | 1456121_at   | Strain | Lrriq2        | 74201  | 16   | 54796937  | 54831308  | -    |
| 21559 | 1454460_at   | Strain | 5730433N10Rik | 70545  | 1    | 80170965  | 80172421  | -    |
| 21560 | 1430837_a_at | Strain | Mbd1          | 17190  | 18   | 74502520  | 74516914  | +    |
| 21561 | 1424334_at   | Strain | Tspan17       | 74257  | 13   | 53396633  | 53403940  | +    |

|       |              |        |               |        |      |           |           |      |
|-------|--------------|--------|---------------|--------|------|-----------|-----------|------|
| 21562 | 1452385_at   | Strain | Usp53         | 99526  | 3    | 121722848 | 121773789 | -    |
| 21563 | 1421872_at   | Strain | Rab24         | 19336  | 13   | 53928673  | 53930803  | -    |
| 21564 | 1416746_at   | Strain | H2afx         | 15270  | 9    | 44323570  | 44324932  | +    |
| 21565 | 1440205_at   | Strain | None          | None   | 2    | 24891628  | 24894057  | +    |
| 21566 | 1451072_a_at | Strain | Rnf4          | 19822  | 5    | 32824728  | 32841768  | +    |
| 21567 | 1443869_at   | Strain | E430028B21Rik | 211948 | 14   | 24760322  | 24766051  | -    |
| 21568 | 1439722_at   | Strain | BC020002      | 252875 | 6    | 8183603   | 8211482   | +    |
| 21569 | 1417932_at   | Strain | Il18          | 16173  | 9    | 50637694  | 50654163  | +    |
| 21570 | 1447143_at   | Strain | None          | None   | 6    | 12046742  | 12047259  | +    |
| 21571 | 1455577_at   | Strain | Ccl28         | 56838  | 13   | 7664      | 8154      | -    |
| 21572 | 1434419_s_at | Strain | Tardbp        | 230908 | 4    | 147104744 | 147119358 | -    |
| 21573 | 1432001_at   | Strain | Zmynd17       | 74843  | 14   | 18844181  | 18858213  | -    |
| 21574 | 1458123_at   | Strain | 9630002A11Rik | 319588 | 11   | 93150673  | 93151337  | +    |
| 21575 | 1422681_at   | Strain | Sh2bp1        | 22083  | 7    | 104882158 | 104909760 | +    |
| 21576 | 1457949_at   | Strain | None          | None   | 19   | 46435816  | 46436365  | -    |
| 21577 | 1429168_at   | Strain | Btbd4         | 72147  | 2    | 181127507 | 181176383 | -    |
| 21578 | 1449053_s_at | Strain | Cog1          | 16834  | 11   | 113470639 | 113483494 | +    |
| 21579 | 1452404_at   | Strain | Phactr2       | 215789 | 10   | 13095457  | 13358121  | -    |
| 21580 | 1427461_at   | Strain | BC005561      | 243171 | 5    | 103544472 | 103558503 | +    |
| 21581 | 1443495_at   | Strain | Atp5j2        | 57423  | 5    | 144222142 | 144230028 | +    |
| 21582 | 1444411_at   | Strain | Myo5a         | 17918  | 9    | 75209875  | 75357058  | -    |
| 21583 | 1460435_at   | Strain | 1500002O20Rik | 71997  | 7    | 19575337  | 19598486  | +    |
| 21584 | 1430987_s_at | Strain | Wbp11         | 60321  | 6    | 137585452 | 137599924 | -    |
| 21585 | 1415702_a_at | Strain | Ctbp1         | 13016  | 5    | 31736177  | 31763423  | -    |
| 21586 | 1458584_at   | Strain | 4832406H04Rik | 320971 | 10   | 29241282  | 29242029  | +    |
| 21587 | 1436864_at   | Strain | Arfrp2        | 218639 | 13   | 110208602 | 110571472 | +    |
| 21588 | 1453522_at   | Strain | 6530401N04Rik | 328092 | 12   | 48749076  | 48758074  | -    |
| 21589 | 1415974_at   | Strain | Map2k2        | 26396  | 10   | 81240906  | 81258829  | +    |
| 21590 | 1439353_x_at | Strain | 4930577M16Rik | 99887  | 3    | 119983678 | 120044986 | -    |
| 21591 | 1447403_a_at | Strain | Zmynd19       | 67187  | 2    | 24881964  | 24891575  | +    |
| 21592 | 1446138_at   | Strain | Kifap3        | 16579  | 1    | 163697221 | 163834642 | +    |
| 21593 | 1459450_at   | Strain | Chd9          | 109151 | 8    | 90136946  | 90137565  | +    |
| 21594 | 1430971_a_at | Strain | Aqr           | 11834  | 2    | 113615012 | 113689159 | -    |
| 21595 | 1435938_at   | Strain | 2610318C08Rik | 70466  | 2    | 128782734 | 128811017 | -    |
| 21596 | 1457241_at   | Strain | 4930449E07Rik | 74665  | 11   | 60079022  | 60119975  | +    |
| 21597 | 1416736_at   | Strain | Casc3         | 192160 | 11   | 98625992  | 98654894  | +    |
| 21598 | 1424142_at   | Strain | Ikbkap        | 230233 | 4    | 56694223  | 56745708  | -    |
| 21599 | 1437817_at   | Strain | Snap91        | 20616  | 9    | 87108242  | 87224260  | -    |
| 21600 | 1449659_s_at | Strain | Mphosph9      | 269702 | 5    | 123422304 | 123499213 | -    |
| 21601 | 1422522_at   | Strain | Fxr2h         | 23879  | 11   | 69358976  | 69378357  | +    |
| 21602 | 1446183_at   | Strain | Als2          | 74018  | 1    | 59468051  | 59542338  | -    |
| 21603 | 1459339_at   | Strain | None          | None   | NONE | NONE      | NONE      | NONE |
| 21604 | 1423072_at   | Strain | 6720475J19Rik | 68157  | NONE | NONE      | NONE      | NONE |
| 21605 | 1450357_a_at | Strain | Ccr6          | 12458  | 17   | 840       | 2215      | +    |
| 21606 | 1460258_at   | Strain | Lect1         | 16840  | 14   | 73991740  | 74016217  | -    |
| 21607 | 1419352_at   | Strain | 0610007P06Rik | 67669  | 7    | 83909488  | 83932405  | -    |
| 21608 | 1453019_at   | Strain | Nvl           | 67459  | 1    | 181047238 | 181097972 | -    |
| 21609 | 1441994_at   | Strain | Pcdhb16       | 93887  | 18   | 37701562  | 37706506  | +    |
| 21610 | 1421260_a_at | Strain | Srm           | 20810  | 4    | 147083875 | 147086981 | +    |
| 21611 | 1453038_at   | Strain | 4930422G04Rik | 71643  | 3    | 126444767 | 126499719 | +    |
| 21612 | 1423313_at   | Strain | Pde7a         | 18583  | 3    | 18563269  | 18602308  | -    |
| 21613 | 1434879_at   | Strain | Cdc34         | 216150 | 10   | 79805178  | 79811022  | +    |
| 21614 | 1458856_at   | Strain | Pfas          | 237823 | 11   | 68711358  | 68729532  | -    |
| 21615 | 1421047_at   | Strain | Smad5         | 17129  | 13   | 55343778  | 55362726  | +    |
| 21616 | 1419605_at   | Strain | Mgl1          | 17312  | 11   | 69892432  | 69896492  | +    |
| 21617 | 1441515_at   | Strain | None          | None   | 12   | 3902173   | 3902775   | -    |
| 21618 | 1436415_at   | Strain | None          | None   | 7    | 23790280  | 23790791  | -    |
| 21619 | 1446875_at   | Strain | 1700025D03Rik | 67944  | X    | 131753104 | 131753700 | -    |
| 21620 | 1418354_at   | Strain | Cog1          | 16834  | 11   | 113470639 | 113483494 | +    |
| 21621 | 1451485_at   | Strain | 3300001P08Rik | 67684  | 11   | 94112226  | 94142998  | -    |
| 21622 | 1460426_at   | Strain | 9430063L05Rik | 229622 | 3    | 97225124  | 97254244  | -    |
| 21623 | 1417645_at   | Strain | Sspn          | 16651  | 6    | 146867107 | 146898185 | +    |
| 21624 | 1444775_at   | Strain | 9930033D15Rik | 320147 | 2    | 31085935  | 31086588  | +    |
| 21625 | 1420830_x_at | Strain | Ywhaq         | 22630  | 12   | 18728420  | 18754333  | +    |
| 21626 | 1424360_at   | Strain | BC019943      | 234138 | 8    | 29932839  | 29943872  | +    |

|       |              |        |               |        |      |           |           |      |
|-------|--------------|--------|---------------|--------|------|-----------|-----------|------|
| 21627 | 1454003_at   | Strain | Afg3l2        | 69597  | 18   | 67635433  | 67694777  | -    |
| 21628 | 1457417_at   | Strain | D2Ert485e     | 329506 | 2    | 121470306 | 121527439 | +    |
| 21629 | 1451222_at   | Strain | 4632412E09Rik | 70533  | 4    | 107773200 | 107792489 | -    |
| 21630 | 1460147_at   | Strain | A730009E18Rik | 319603 | 13   | 105886918 | 105887540 | +    |
| 21631 | 1437377_a_at | Strain | Polrmt        | 216151 | 10   | 79858754  | 79869197  | -    |
| 21632 | 1446807_at   | Strain | Usp8          | 84092  | 2    | 126221216 | 126273150 | +    |
| 21633 | 1430158_at   | Strain | 3110021A11Rik | 67289  | 6    | 120280712 | 120281445 | +    |
| 21634 | 1415725_at   | Strain | Rrn3          | 106298 | 16   | 12509662  | 12550696  | +    |
| 21635 | 1447290_at   | Strain | 2610042O14Rik | 66460  | 2    | 163917729 | 163922245 | +    |
| 21636 | 1416365_at   | Strain | Hspcb         | 15516  | 17   | 43078708  | 43084593  | -    |
| 21637 | 1430078_a_at | Strain | Ogg1          | 18294  | 6    | 113894844 | 113902017 | +    |
| 21638 | 1421906_at   | Strain | Pparbp        | 19014  | 11   | 97973241  | 98014347  | -    |
| 21639 | 1446012_at   | Strain | Dtnb          | 13528  | 12   | 2476      | 11394     | +    |
| 21640 | 1431404_at   | Strain | 4930577M16Rik | 99887  | 3    | 119983678 | 120044986 | -    |
| 21641 | 1435152_at   | Strain | Leng8         | 232798 | 7    | 3357908   | 3367446   | +    |
| 21642 | 1447454_at   | Strain | Kif5c         | 16574  | 2    | 49551476  | 49706940  | +    |
| 21643 | 1437013_x_at | Strain | Atp6v0b       | 114143 | 4    | 116843235 | 116846234 | -    |
| 21644 | 1428841_at   | Strain | Vmd2          | 24115  | 19   | 9181671   | 9193711   | -    |
| 21645 | 1428942_at   | Strain | Mt2           | 17750  | 8    | 93456956  | 93457734  | +    |
| 21646 | 1448564_at   | Strain | Cib1          | 23991  | 7    | 74026419  | 74031875  | -    |
| 21647 | 1459625_at   | Strain | Frap1         | 56717  | 4    | 146940969 | 147050045 | +    |
| 21648 | 1450076_at   | Strain | 4933411K20Rik | 66756  | 8    | 45112900  | 45139459  | +    |
| 21649 | 1422560_at   | Strain | Ddi2          | 68817  | 4    | 140564823 | 140567153 | -    |
| 21650 | 1450861_at   | Strain | Fancc         | 14088  | 13   | 60694745  | 60814715  | -    |
| 21651 | 1419916_at   | Strain | Rnf20         | 109331 | 4    | 49547995  | 49572760  | +    |
| 21652 | 1457287_at   | Strain | None          | None   | 6    | 109171346 | 109365184 | +    |
| 21653 | 1443540_at   | Strain | Map3k1        | 26401  | 13   | 108136840 | 108199233 | -    |
| 21654 | 1437401_at   | Strain | Igf1          | 16000  | 10   | 87833042  | 87904980  | +    |
| 21655 | 1436115_at   | Strain | Gm266         | 212539 | 12   | 106958000 | 106958491 | -    |
| 21656 | 1416794_at   | Strain | Arl6ip2       | 56298  | 17   | 77665786  | 77673524  | -    |
| 21657 | 1455433_at   | Strain | 3110048L19Rik | 73233  | 17   | 19796748  | 19797257  | -    |
| 21658 | 1438979_s_at | Strain | 1700029I15Rik | 75641  | 2    | 92087601  | 92088284  | +    |
| 21659 | 1441457_at   | Strain | None          | None   | 9    | 58771161  | 58771846  | +    |
| 21660 | 1448009_at   | Strain | Ugcgl1        | 320011 | 1    | 36434885  | 36535646  | -    |
| 21661 | 1454477_at   | Strain | 5530401A10Rik | 71431  | 19   | 4183614   | 4184990   | -    |
| 21662 | 1434080_at   | Strain | Aebp2         | 11569  | 6    | 141421299 | 141478643 | +    |
| 21663 | 1416056_a_at | Strain | Ndufb11       | 104130 | X    | 18854266  | 18856494  | -    |
| 21664 | 1415858_at   | Strain | Eif3s8        | 56347  | 7    | 120596642 | 120616097 | -    |
| 21665 | 1447924_at   | Strain | Nucks1        | 98415  | 1    | 131762351 | 131784790 | +    |
| 21666 | 1447944_at   | Strain | Zkscan1       | 74570  | 5    | 137058118 | 137075887 | +    |
| 21667 | 1439621_at   | Strain | None          | None   | NONE | NONE      | NONE      | NONE |
| 21668 | 1450778_a_at | Strain | Rnuxa         | 56698  | 18   | 56791046  | 56805535  | +    |
| 21669 | 1424687_at   | Strain | 2700008B19Rik | 217026 | 11   | 83481700  | 83510195  | +    |
| 21670 | 1448032_at   | Strain | Azi2          | 27215  | 9    | 118036598 | 118059690 | +    |
| 21671 | 1455407_at   | Strain | Zfp236        | 329002 | 18   | 82763227  | 82861085  | -    |
| 21672 | 1449446_at   | Strain | D10Ert4718e   | 52713  | 10   | 105733969 | 105740000 | +    |
| 21673 | 1433479_at   | Strain | 5730410I19Rik | 66622  | 12   | 98203846  | 98224080  | +    |
| 21674 | 1448585_at   | Strain | Gtf2h4        | 14885  | 17   | 33384058  | 33390001  | -    |
| 21675 | 1444433_at   | Strain | Auh           | 11992  | 13   | 51398632  | 51493178  | -    |
| 21676 | 1431413_at   | Strain | 9130218E19Rik | 77677  | 1    | 91047054  | 91048226  | +    |
| 21677 | 1418074_at   | Strain | St6galnac4    | 20448  | 2    | 32519652  | 32532644  | +    |
| 21678 | 1453302_at   | Strain | 4930429O20Rik | 74626  | 1    | 132363502 | 132365909 | +    |

Myl6 /// LOC432856  
/// LOC433297 ///

|       |              |        |               |       |    |           |           |   |
|-------|--------------|--------|---------------|-------|----|-----------|-----------|---|
| 21679 | 1434396_a_at | Strain | LOC546126     | 17904 | 10 | 128227888 | 128230852 | - |
| 21680 | 1418702_a_at | Strain | 2810428I15Rik | 66462 | 8  | 69659864  | 69662106  | - |
| 21681 | 1431669_at   | Strain | 4930583I09Rik | 78057 | 17 | 62534920  | 62538468  | - |
| 21682 | 1457515_at   | Strain | Hipk1         | 15257 | 3  | 103171062 | 103218570 | - |
| 21683 | 1460237_at   | Strain | Trim8         | 93679 | 19 | 46050008  | 46064111  | + |
| 21684 | 1416670_at   | Strain | Setdb1        | 84505 | 3  | 94811356  | 94845004  | - |
| 21685 | 1456209_x_at | Strain | Klf13         | 50794 | 7  | 57665144  | 57712634  | - |
| 21686 | 1434691_at   | Strain | None          | None  | 15 | 96479068  | 96480977  | - |
| 21687 | 1445847_at   | Strain | None          | None  | 13 | 57521233  | 57522123  | + |
| 21688 | 1432719_at   | Strain | 4833412K13Rik | 74607 | 1  | 78754094  | 78755563  | - |

|       |              |        |               |        |      |           |           |      |
|-------|--------------|--------|---------------|--------|------|-----------|-----------|------|
| 21689 | 1443219_at   | Strain | None          | None   | 11   | 46726354  | 46727019  | -    |
| 21690 | 1438034_at   | Strain | 2410005O16Rik | 66302  | 4    | 19502173  | 19533898  | +    |
| 21691 | 1444996_at   | Strain | Depdc5        | 277854 | 5    | 31352231  | 31444754  | +    |
| 21692 | 1428988_at   | Strain | Abcc3         | 76408  | 11   | 94164382  | 94182408  | -    |
| 21693 | 1445612_at   | Strain | Tox           | 252838 | 4    | 6614604   | 6917869   | -    |
| 21694 | 1456488_at   | Strain | Wdr33         | 74320  | 18   | 32067429  | 32147139  | +    |
| 21695 | 1451797_at   | Strain | BC024683      | 229512 | 3    | 88079530  | 88106201  | +    |
| 21696 | 1421109_at   | Strain | Cml2          | 93673  | 6    | 86300991  | 86304727  | -    |
| 21697 | 1441170_a_at | Strain | Dab2ip        | 69601  | 2    | 35624156  | 35663154  | +    |
| 21698 | 1438295_at   | Strain | Glcc1         | 170772 | 6    | 8234651   | 8573400   | +    |
| 21699 | 1447140_at   | Strain | C130078N14    | 329478 | NONE | NONE      | NONE      | NONE |
| 21700 | 1440915_at   | Strain | Mphosph9      | 269702 | 5    | 123422304 | 123499213 | -    |
| 21701 | 1437916_at   | Strain | Klf13         | 50794  | 7    | 57665144  | 57712634  | -    |
| 21702 | 1438070_at   | Strain | Phf3          | 213109 | 1    | 31075361  | 31146157  | -    |
| 21703 | 1452479_at   | Strain | Copg2as2      | 54158  | NONE | NONE      | NONE      | NONE |
| 21704 | 1447204_at   | Strain | Flrt2         | 399558 | 12   | 91102888  | 91191660  | +    |
| 21705 | 1417180_at   | Strain | Pcsk7         | 18554  | 9    | 45920249  | 45942975  | +    |
| 21706 | 1428178_s_at | Strain | Trappc6b      | 78232  | 12   | 55776176  | 55794473  | -    |
| 21707 | 1451316_a_at | Strain | Picalm        | 233489 | 7    | 84121344  | 84258493  | +    |
| 21708 | 1446925_at   | Strain | Btrc          | 12234  | 19   | 44911191  | 45076729  | +    |
| 21709 | 1443104_at   | Strain | 4933431N12Rik | 71310  | 8    | 82412909  | 82519979  | +    |
| 21710 | 1425054_a_at | Strain | 2510006D16Rik | 76799  | 4    | 128627820 | 128635003 | +    |
| 21711 | 1457245_at   | Strain | None          | None   | 16   | 34475375  | 34475780  | -    |
| 21712 | 1437078_at   | Strain | Vps52         | 224705 | 17   | 31665443  | 31670899  | +    |
| 21713 | 1437891_at   | Strain | Frs2          | 327826 | 10   | 116759579 | 116837926 | -    |
| 21714 | 1437441_at   | Strain | None          | None   | NONE | NONE      | NONE      | NONE |
| 21715 | 1455887_at   | Strain | Alg8          | 381903 | 7    | 91417839  | 91438435  | +    |
| 21716 | 1427350_a_at | Strain | Gtpbp6        | 107999 | 5    | 109154503 | 109158389 | -    |
| 21717 | 1429034_at   | Strain | Eme2          | 193838 | 17   | 22698429  | 22700965  | -    |
| 21718 | 1456024_at   | Strain | Gtf3c1        | 233863 | 7    | 119690685 | 119757419 | -    |
| 21719 | 1442944_at   | Strain | C76555        | 97125  | NONE | NONE      | NONE      | NONE |
| 21720 | 1452274_at   | Strain | Tex27         | 21769  | 17   | 27815127  | 28020060  | +    |
| 21721 | 1439691_at   | Strain | D5ErtD579e    | 320661 | 5    | 35088907  | 35109670  | -    |
| 21722 | 1458172_at   | Strain | Me2           | 107029 | 18   | 74004269  | 74049621  | -    |
| 21723 | 1428248_at   | Strain | Nfx1          | 74164  | 4    | 41109832  | 41164029  | +    |
| 21724 | 1458605_at   | Strain | Arfrp2        | 218639 | 13   | 110208602 | 110571472 | +    |
| 21725 | 1424958_at   | Strain | Car8          | 12319  | 4    | 8072625   | 8166127   | -    |
| 21726 | 1422268_a_at | Strain | Rps6kb2       | 58988  | 19   | 3945767   | 3952035   | -    |
| 21727 | 1430798_x_at | Strain | Mrpl15        | 27395  | 1    | 4733601   | 4746102   | -    |
| 21728 | 1430003_at   | Strain | 6330412A17Rik | 74005  | 18   | 12118176  | 12119978  | +    |
| 21729 | 1433958_at   | Strain | 9830165K03Rik | 216846 | 11   | 69025154  | 69049433  | -    |
| 21730 | 1457351_at   | Strain | Taf2          | 319944 | 15   | 55050189  | 55051519  | -    |
| 21731 | 1455420_at   | Strain | Rad23b        | 19359  | 4    | 55265936  | 55307091  | +    |
| 21732 | 1458082_at   | Strain | Cd200         | 17470  | 16   | 44266133  | 44292916  | -    |
| 21733 | 1418408_at   | Strain | Zfand1        | 66361  | 3    | 10341503  | 10352848  | -    |
| 21734 | 1457591_at   | Strain | Gm67          | 217431 | 12   | 16711160  | 16792762  | +    |
| 21735 | 1442442_at   | Strain | None          | None   | 14   | 12422037  | 12422505  | -    |
| 21736 | 1420422_at   | Strain | Pcdhb21       | 93892  | 18   | 37737542  | 37740085  | +    |
| 21737 | 1454750_a_at | Strain | BC057552      | 212123 | 8    | 83360504  | 83368261  | -    |
| 21738 | 1456256_at   | Strain | Eif5          | 217869 | 12   | 107012763 | 107017765 | +    |
| 21739 | 1443354_at   | Strain | Trim59        | 66949  | 3    | 68705814  | 68715182  | -    |
| 21740 | 1446538_at   | Strain | Kpna3         | 16648  | 14   | 55898702  | 55974523  | -    |
| 21741 | 1420732_at   | Strain | 2510027J23Rik | 66568  | 3    | 119952653 | 119953364 | -    |
| 21742 | 1453520_at   | Strain | Ttc21b        | 73668  | 2    | 66040107  | 66112017  | -    |
| 21743 | 1430712_at   | Strain | Arhgap24      | 231532 | 5    | 101508673 | 101932043 | +    |
| 21744 | 1439358_a_at | Strain | Nrxn1         | 18189  | 17   | 87900413  | 88568779  | -    |
| 21745 | 1436765_at   | Strain | Pard3         | 93742  | 8    | 126354044 | 126919239 | +    |
| 21746 | 1441370_at   | Strain | 3632431M01Rik | 330401 | 6    | 116456153 | 116631023 | -    |
| 21747 | 1443188_at   | Strain | 6130401J04Rik | 66799  | 1    | 16725948  | 16804454  | -    |
| 21748 | 1456091_at   | Strain | Sec22I3       | 215474 | 9    | 121695485 | 121719087 | -    |
| 21749 | 1458527_at   | Strain | None          | None   | NONE | NONE      | NONE      | NONE |
| 21750 | 1447964_at   | Strain | Ttl           | 69737  | 2    | 128579837 | 128607602 | +    |
| 21751 | 1442517_a_at | Strain | 9630013A20Rik | 319903 | 14   | 78810131  | 78835054  | -    |
| 21752 | 1446010_at   | Strain | C85067        | 97889  | 13   | 101785583 | 101786305 | -    |
| 21753 | 1444076_at   | Strain | Zfp81         | 224694 | 17   | 31036209  | 31061836  | -    |



|       |              |        |               |        |    |           |           |   |
|-------|--------------|--------|---------------|--------|----|-----------|-----------|---|
| 21754 | 1428870_at   | Strain | Nolc1         | 70769  | 19 | 45623180  | 45630496  | + |
| 21755 | 1445858_at   | Strain | 4933439G19Rik | 414080 |    | 71855359  | 71855772  | - |
| 21756 | 1435914_at   | Strain | Ncor1         | 20185  | 11 | 62043183  | 62164152  | - |
| 21757 | 1452442_at   | Strain | Usp13         | 72607  | 3  | 32323945  | 32343734  | + |
| 21758 | 1447426_at   | Strain | Dip3b         | 216190 | 10 | 83487957  | 83536588  | - |
| 21759 | 1433813_at   | Strain | Tmem48        | 72787  | 4  | 106326943 | 106373244 | + |
| 21760 | 1416512_at   | Strain | Nubp2         | 26426  | 17 | 22688533  | 22692246  | - |
| 21761 | 1446057_at   | Strain | Rlf           | 109263 | 4  | 120167817 | 120237523 | - |
| 21762 | 1444757_at   | Strain | Eef1e1        | 66143  | 13 | 38186438  | 38199754  | - |
| 21763 | 1455776_x_at | Strain | 1110025L05Rik | 66162  | 7  | 120745731 | 120746424 | + |
| 21764 | 1434355_at   | Strain | Zfp617        | 170938 | 8  | 71079283  | 71092128  | + |
| 21765 | 1432262_at   | Strain | 4930504E06Rik | 75007  | 3  | 94770775  | 94783992  | + |
| 21766 | 1438432_at   | Strain | 2010309L07Rik | 66485  | 17 | 15387098  | 15388425  | - |
| 21767 | 1417315_at   | Strain | Gripap1       | 54645  | X  | 6028935   | 6059503   | + |
| 21768 | 1450711_at   | Strain | Brd4          | 57261  | 17 | 30005231  | 30094101  | - |
| 21769 | 1439875_at   | Strain | Zfp128        | 243833 | 7  | 10874888  | 10887103  | + |
| 21770 | 1451079_at   | Strain | Adpgk         | 72141  | 9  | 59408367  | 59432955  | + |
| 21771 | 1435422_at   | Strain | 4933433P14Rik | 66787  | 12 | 101145518 | 101150041 | + |
| 21772 | 1430834_at   | Strain | C030038J10Rik | 243385 | 6  | 59598164  | 59670385  | - |
| 21773 | 1433091_at   | Strain | 6430514K02Rik | 76885  | 8  | 48702749  | 48704166  | - |
| 21774 | 1418663_at   | Strain | Mpdz          | 17475  | 4  | 80278786  | 80441865  | - |
| 21775 | 1459467_at   | Strain | None          | None   | 14 | 22602017  | 22602617  | - |
| 21776 | 1420165_s_at | Strain | Dnajc17       | 69408  | 2  | 118686349 | 118722623 | - |
| 21777 | 1424457_at   | Strain | Apbb3         | 225372 | 18 | 36894927  | 36903131  | - |
| 21778 | 1434844_at   | Strain | MGC78289      | 238023 | 11 | 121028780 | 121043740 | + |
| 21779 | 1422469_at   | Strain | Tbk1          | 56480  | 10 | 121202714 | 121243001 | - |
| 21780 | 1458401_at   | Strain | 4932438A13Rik | 229227 | 3  | 36326717  | 36516613  | + |
| 21781 | 1431405_a_at | Strain | 4930413O22Rik | 67986  | 1  | 10144887  | 10173449  | + |
| 21782 | 1458148_at   | Strain | D230007K08Rik | 268857 | 16 | 3617932   | 3648198   | - |
| 21783 | 1451328_at   | Strain | Pcnx13        | 104401 | 19 | 5453430   | 5476939   | - |
| 21784 | 1427319_at   | Strain | A230046K03Rik | 319277 | 10 | 83431696  | 83484395  | + |
| 21785 | 1417671_at   | Strain | Scly          | 50880  | 1  | 91121380  | 91144116  | + |
| 21786 | 1435144_at   | Strain | None          | None   | 15 | 6453936   | 6454430   | + |
| 21787 | 1453589_a_at | Strain | 2610005L07Rik | 381598 | 15 | 1398      | 8167      | + |
| 21788 | 1423920_at   | Strain | Brrn1         | 215387 | 2  | 126617682 | 126647758 | - |
| 21789 | 1424816_at   | Strain | Cecr5         | 214932 | 6  | 120941468 | 120963273 | - |
| 21790 | 1425404_a_at | Strain | 2310014H19Rik | 69179  | 14 | 28957085  | 29008988  | + |
| 21791 | 1443286_at   | Strain | AU019754      | 105964 | 15 | 100312989 | 100313641 | + |
| 21792 | 1418306_at   | Strain | Crybb1        | 12960  | 5  | 111325810 | 111339571 | + |
| 21793 | 1425599_a_at | Strain | Gatad1        | 67210  | 5  | 3645974   | 3653922   | - |
| 21794 | 1446102_at   | Strain | D9Erd292e     | 52208  | 9  | 107909481 | 107910183 | + |
| 21795 | 1426805_at   | Strain | Smarca4       | 20586  | 9  | 21522528  | 21593154  | + |
| 21796 | 1420540_a_at | Strain | Rit1          | 19769  | 3  | 88460728  | 88473591  | + |
| 21797 | 1454701_at   | Strain | 4930503L19Rik | 269033 | 18 | 70685809  | 70705149  | - |
| 21798 | 1432059_x_at | Strain | 5031425E22Rik | 75977  | 5  | 21848106  | 21897224  | - |
| 21799 | 1427322_at   | Strain | Brwd1         | 93871  | 16 | 95429851  | 95519830  | - |
| 21800 | 1424611_x_at | Strain | Trub2         | 227682 | 2  | 29708273  | 29720664  | - |
| 21801 | 1458181_at   | Strain | 9030624J02Rik | 71517  | 7  | 112616598 | 112717342 | + |
| 21802 | 1425997_a_at | Strain | Pign          | 27392  | 1  | 105412403 | 105554926 | - |
| 21803 | 1421557_x_at | Strain | Txn2          | 56551  | 15 | 77967008  | 77980951  | - |
| 21804 | 1444119_at   | Strain | B930006L02Rik | 319604 | 7  | 94813378  | 94948322  | + |
| 21805 | 1426849_at   | Strain | Sec24b        | 99683  | 3  | 128916056 | 128993778 | - |
| 21806 | 1423788_at   | Strain | Nup133        | 234865 | 8  | 123186372 | 123236337 | - |
| 21807 | 1421817_at   | Strain | Gsr           | 14782  | 8  | 32458839  | 32503763  | + |
| 21808 | 1440483_at   | Strain | Plekhn2       | 69582  | 4  | 140506995 | 140546160 | - |
| 21809 | 1446521_at   | Strain | Psm14         | 59029  | 2  | 61567169  | 61655776  | + |
| 21810 | 1416423_x_at | Strain | Ssb           | 20823  | 2  | 69717028  | 69727204  | + |
| 21811 | 1433651_at   | Strain | Wtip          | 101543 | 7  | 29263338  | 29287059  | - |
| 21812 | 1418769_at   | Strain | Myoz2         | 59006  | 3  | 121795553 | 121824585 | - |
| 21813 | 1443110_at   | Strain | Gtf2e1        | 74197  | 16 | 36329263  | 36359236  | - |
| 21814 | 1421476_a_at | Strain | Cant1         | 76025  | 11 | 118231701 | 118240124 | - |
| 21815 | 1458525_at   | Strain | App           | 11820  | 16 | 84062547  | 84281536  | - |
| 21816 | 1460582_x_at | Strain | a             | 50518  | 2  | 154470514 | 154507920 | + |
| 21817 | 1457796_at   | Strain | Ubr1          | 22222  | 2  | 120375495 | 120484564 | - |
| 21818 | 1447615_at   | Strain | Fmn           | 14260  | 2  | 112951020 | 113333093 | + |

|       |              |        |               |        |    |           |           |   |
|-------|--------------|--------|---------------|--------|----|-----------|-----------|---|
| 21819 | 1436640_x_at | Strain | Agpat4        | 68262  | 17 | 10758734  | 10859090  | + |
| 21820 | 1453146_at   | Strain | Gapvd1        | 66691  | 2  | 34609129  | 34687394  | - |
| 21821 | 1455211_a_at | Strain | Timm9         | 30055  | 10 | 81031392  | 81032707  | - |
| 21822 | 1453296_at   | Strain | 2610002I17Rik | 72341  | 9  | 110345158 | 110362186 | + |
| 21823 | 1445649_x_at | Strain | Zfp142        | 77264  | 1  | 74868909  | 74890473  | - |
| 21824 | 1435768_at   | Strain | Arid4b        | 94246  | 13 | 13506342  | 13643882  | + |
| 21825 | 1436923_at   | Strain | Rab2b         | 76338  | 14 | 47361876  | 47379434  | - |
| 21826 | 1449903_at   | Strain | Crtam         | 54698  | 9  | 40925014  | 40956938  | - |
| 21827 | 1441136_at   | Strain | None          | None   |    | 46546772  | 46547481  | + |
| 21828 | 1452167_at   | Strain | 2810407C02Rik | 69227  | 3  | 58220979  | 58236191  | + |
| 21829 | 1453775_at   | Strain | 4921505C17Rik | 78757  | 15 | 6496946   | 6588954   | + |
| 21830 | 1428414_at   | Strain | 5730405I09Rik | 67974  | 18 | 9356614   | 9490220   | - |
| 21831 | 1417268_at   | Strain | Cd14          | 12475  | 18 | 36948832  | 36950419  | - |
| 21832 | 1419658_at   | Strain | None          | None   | 17 | 33748708  | 33751704  | - |
| 21833 | 1458218_s_at | Strain | Pde7a         | 18583  | 3  | 18563269  | 18602308  | - |
| 21834 | 1416322_at   | Strain | Prelp         | 116847 | 1  | 133761069 | 133772168 | - |
| 21835 | 1422524_at   | Strain | Abcb6         | 74104  | 1  | 75459418  | 75468059  | - |
| 21836 | 1438313_at   | Strain | None          | None   | 7  | 86879042  | 86879312  | + |
| 21837 | 1419909_at   | Strain | Mphosph9      | 269702 | 5  | 123422304 | 123499213 | - |
| 21838 | 1460041_at   | Strain | D630040I23Rik | 107398 | 19 | 6805842   | 6807622   | - |
| 21839 | 1423992_at   | Strain | Gatad2a       | 234366 | 8  | 69059749  | 69147743  | - |
| 21840 | 1443517_at   | Strain | 6030443O07Rik | 226151 | 19 | 44475557  | 44527665  | + |
| 21841 | 1428192_at   | Strain | Gm295         | 211255 | 14 | 73782842  | 73785087  | + |
| 21842 | 1438028_at   | Strain | 4930535B03Rik | 75137  | 3  | 95249480  | 95306695  | - |
| 21843 | 1441226_at   | Strain | Spon1         | 233744 | 7  | 107618725 | 107894210 | + |
| 21844 | 1432428_at   | Strain | C030011J08Rik | 77318  | 13 | 108676996 | 108772712 | + |
| 21845 | 1439988_at   | Strain | C81203        | 96909  | 1  | 4740358   | 4741427   | - |
| 21846 | 1444327_at   | Strain | Edd1          | 70790  | 15 | 37972806  | 38204070  | - |
| 21847 | 1440604_at   | Strain | Eif4g3        | 230861 | 4  | 136874731 | 137087744 | + |
| 21848 | 1456732_at   | Strain | Gpd1          | 14555  | 15 | 99774809  | 99782224  | + |
| 21849 | 1418516_at   | Strain | Mtf2          | 17765  | 5  | 107157468 | 107177436 | + |
| 21850 | 1424172_at   | Strain | Hagh          | 14651  | 17 | 22655960  | 22670054  | + |
| 21851 | 1419092_a_at | Strain | Slk           | 20874  | 19 | 47131319  | 47193755  | + |
| 21852 | 1422676_at   | Strain | Smarce1       | 57376  | 11 | 99030134  | 99052104  | - |
| 21853 | 1455059_at   | Strain | 9430093I07Rik | 109278 | 11 | 107513385 | 107514913 | + |
| 21854 | 1435347_at   | Strain | Stau1         | 20853  | 2  | 166405006 | 166453032 | - |
| 21855 | 1427069_at   | Strain | Fbxo28        | 67948  | 1  | 182273786 | 182300573 | - |
| 21856 | 1445316_at   | Strain | 4930438O05Rik | 78795  | 1  | 85961103  | 86084595  | + |
| 21857 | 1423199_at   | Strain | Brd3          | 67382  | 2  | 27379952  | 27419365  | - |
| 21858 | 1454303_at   | Strain | Epn2          | 13855  | 11 | 61242891  | 61305293  | - |
| 21859 | 1423970_at   | Strain | Thoc3         | 73666  | 13 | 53069551  | 53078853  | - |
| 21860 | 1430819_at   | Strain | Asahl         | 67111  | 5  | 91594004  | 91613926  | - |
| 21861 | 1445773_at   | Strain | Meis1         | 17268  | 11 | 18775221  | 18913473  | - |
| 21862 | 1416202_at   | Strain | Bcap37        | 12034  | 6  | 125367716 | 125372298 | + |
| 21863 | 1425040_at   | Strain | Cybrd1        | 73649  | 2  | 70805450  | 70839291  | + |
| 21864 | 1438207_at   | Strain | Gbf1          | 107338 | 19 | 45699725  | 45833852  | + |
| 21865 | 1438692_at   | Strain | Gtf3c4        | 269252 | 2  | 28757737  | 28772448  | - |
| 21866 | 1458515_at   | Strain | Zfp128        | 243833 | 7  | 10874888  | 10887103  | + |
| 21867 | 1437263_at   | Strain | A730089K16Rik | 320411 | 5  | 75901168  | 75903524  | - |
| 21868 | 1423808_at   | Strain | BC021790      | 216853 | 11 | 69287412  | 69304982  | - |
| 21869 | 1420810_at   | Strain | 1500003O03Rik | 56398  | 2  | 119061563 | 119100869 | + |
| 21870 | 1439587_at   | Strain | ---           | 380664 | 10 | 120506866 | 120563150 | - |
| 21871 | 1426843_at   | Strain | BC023754      | 329015 | 19 | 6045057   | 6051092   | + |
| 21872 | 1430298_at   | Strain | A330015D16Rik | 320226 | 4  | 82511740  | 82513118  | + |
| 21873 | 1447063_at   | Strain | 1700017B05Rik | 74211  | 9  | 57364789  | 57376245  | - |
| 21874 | 1438740_at   | Strain | Nmt2          | 18108  | 2  | 3201559   | 3243640   | + |
| 21875 | 1443919_at   | Strain | B230206N24Rik | 210673 | 6  | 114064130 | 114069723 | - |
| 21876 | 1451642_at   | Strain | Kif1b         | 16561  | 4  | 147668683 | 147799980 | - |
| 21877 | 1416851_at   | Strain | St13          | 70356  | 15 | 81415844  | 81450494  | - |
| 21878 | 1444066_at   | Strain | Gapvd1        | 66691  | 2  | 34609129  | 34687394  | - |
| 21879 | 1444766_at   | Strain | None          | None   | 12 | 29978367  | 29979055  | + |
| 21880 | 1456848_at   | Strain | None          | None   | 7  | 30594636  | 30595183  | + |
| 21881 | 1440620_at   | Strain | Rab8a         | 17274  | 8  | 71319426  | 71338872  | + |
| 21882 | 1456913_at   | Strain | Tmod3         | 50875  | 9  | 75635361  | 75697149  | - |
| 21883 | 1443357_at   | Strain | None          | None   | 15 | 11940774  | 11941273  | + |

|       |              |        |               |        |      |           |           |      |
|-------|--------------|--------|---------------|--------|------|-----------|-----------|------|
| 21884 | 1457564_at   | Strain | Dffa          | 13347  | 4    | 147596613 | 147610300 | +    |
| 21885 | 1442310_at   | Strain | Pip5k2a       | 18718  | 2    | 18884270  | 19040126  | -    |
| 21886 | 1445428_at   | Strain | F830020C16Rik | 219150 | 14   | 59350496  | 59478125  | -    |
| 21887 | 1446694_at   | Strain | Dnm3          | 103967 | 1    | 161896669 | 162387092 | -    |
| 21888 | 1453128_at   | Strain | Xlkd1         | 114332 | 7    | 104703544 | 104715890 | -    |
| 21889 | 1439326_at   | Strain | 2010309L07Rik | 66485  | 17   | 15433659  | 15434345  | -    |
| 21890 | 1441151_at   | Strain | AU044157      | 100334 | 4    | 145686824 | 145836683 | +    |
| 21891 | 1458954_at   | Strain | None          | None   | 4    | 42018007  | 42018646  | +    |
| 21892 | 1457753_at   | Strain | Tlr13         | 279572 | X    | 100744640 | 100761858 | +    |
| 21893 | 1451111_at   | Strain | Nup133        | 234865 | 8    | 123186372 | 123236337 | -    |
| 21894 | 1425843_at   | Strain | Mrpl33        | 66845  | 5    | 30072910  | 30081579  | +    |
| 21895 | 1434330_at   | Strain | Lrrc35        | 272589 | 9    | 42371164  | 42431073  | -    |
| 21896 | 1445563_at   | Strain | None          | None   | NONE | NONE      | NONE      | NONE |
| 21897 | 1444500_at   | Strain | Ahsa1         | 217737 | 12   | 84146427  | 84153650  | +    |
| 21898 | 1433797_at   | Strain | E130309D02Rik | 231868 | 5    | 142360090 | 142374242 | -    |
| 21899 | 1427904_s_at | Strain | 2410091C18Rik | 73694  | 17   | 76759371  | 76769734  | +    |
| 21900 | 1427518_at   | Strain | D10627        | 234358 | NONE | NONE      | NONE      | NONE |
| 21901 | 1435698_at   | Strain | 4921505C17Rik | 78757  | 15   | 6496946   | 6588954   | +    |
| 21902 | 1445779_at   | Strain | Grid1         | 14803  | 14   | 32951534  | 33710256  | +    |
| 21903 | 1420077_at   | Strain | AI452102      | 330594 | 7    | 84020274  | 84040181  | +    |
| 21904 | 1435379_at   | Strain | None          | None   | 8    | 123334253 | 123335579 | +    |
| 21905 | 1447557_at   | Strain | Rabif         | 98710  | 1    | 134344923 | 134358148 | +    |
| 21906 | 1433126_at   | Strain | 5330422M15Rik | 77062  | 4    | 149471005 | 149472085 | -    |
| 21907 | 1439073_at   | Strain | Zfp160        | 224585 | 17   | 18880791  | 18900678  | +    |
| 21908 | 1451161_a_at | Strain | Emr1          | 13733  | 17   | 55046956  | 55165548  | +    |
| 21909 | 1439217_at   | Strain | Nalp9c        | 330490 | 7    | 21681793  | 21753568  | -    |
| 21910 | 1428684_at   | Strain | 1500001M20Rik | 68971  | 6    | 115439712 | 115473268 | -    |
| 21911 | 1436048_at   | Strain | Exoc8         | 102058 | 8    | 124180431 | 124185028 | -    |
| 21912 | 1442931_at   | Strain | 2600003E23Rik | 70292  | 5    | 34380831  | 34487415  | +    |
| 21913 | 1439337_at   | Strain | Tom111        | 71943  | 11   | 90464544  | 90465194  | -    |
| 21914 | 1445848_at   | Strain | 9630009C16    | 330433 | 6    | 133897437 | 133897989 | +    |
| 21915 | 1434597_at   | Strain | Larp5         | 217980 | 13   | 9077472   | 9154695   | +    |
| 21916 | 1442343_at   | Strain | None          | None   | 16   | 10549414  | 10549723  | -    |
| 21917 | 1439037_at   | Strain | Ddx17         | 67040  | 15   | 79580294  | 79599072  | -    |
| 21918 | 1439948_at   | Strain | BC046401      | 394191 | 2    | 165315250 | 165315749 | -    |
| 21919 | 1433595_at   | Strain | None          | None   | 4    | 102129558 | 102130187 | -    |
| 21920 | 1455640_a_at | Strain | Txn2          | 56551  | 15   | 77967008  | 77980951  | -    |
| 21921 | 1442354_at   | Strain | B230325K18Rik | 319527 | 7    | 122032889 | 122035511 | +    |
| 21922 | 1458497_at   | Strain | Crim1         | 50766  | 17   | 76086689  | 76087042  | +    |
| 21923 | 1424102_at   | Strain | Atg4bl        | 66615  | 1    | 93597866  | 93619652  | +    |
| 21924 | 1443018_at   | Strain | Ncam1         | 17967  | 9    | 49555319  | 49607941  | -    |
| 21925 | 1430792_at   | Strain | 3230402G14Rik | 70770  | NONE | NONE      | NONE      | NONE |
| 21926 | 1425031_at   | Strain | Fcmd          | 246179 | 4    | 53635886  | 53679150  | +    |
| 21927 | 1439545_at   | Strain | Nrf1          | 18181  | 6    | 30095085  | 30200555  | +    |
| 21928 | 1434529_x_at | Strain | Chfr          | 231600 | 5    | 109186644 | 109222753 | +    |
| 21929 | 1436330_x_at | Strain | 6.72E+21      | 210853 | 17   | 20033048  | 20055559  | -    |
| 21930 | 1417964_at   | Strain | Ap3d1         | 11776  | 10   | 80838692  | 80873927  | -    |
| 21931 | 1429614_at   | Strain | Prpf18        | 67229  | 2    | 4539438   | 4569357   | -    |
| 21932 | 1442017_at   | Strain | Nfs1          | 18041  | 2    | 155580586 | 155601122 | -    |
| 21933 | 1443077_at   | Strain | 9430041J06Rik | 319779 | 11   | 104161593 | 104162284 | -    |
| 21934 | 1451870_a_at | Strain | Brd4          | 57261  | 17   | 30005231  | 30094101  | -    |
| 21935 | 1450781_at   | Strain | Hmga2         | 15364  | 10   | 119939358 | 120054667 | -    |
| 21936 | 1426557_at   | Strain | Mesp1         | 17292  | 7    | 73590348  | 73591713  | -    |
| 21937 | 1443867_at   | Strain | AI447928      | 106585 | 17   | 63695390  | 63696403  | -    |
| 21938 | 1441042_at   | Strain | Fgf1          | 14164  | 18   | 39062902  | 39142421  | -    |
| 21939 | 1431047_at   | Strain | 5430439G14Rik | 71389  | 2    | 160440153 | 160566045 | -    |
| 21940 | 1459292_at   | Strain | Map2k6        | 26399  | 11   | 110220211 | 110334726 | +    |
| 21941 | 1453426_a_at | Strain | Wdfy1         | 69368  | 1    | 80056762  | 80093054  | -    |
| 21942 | 1460333_at   | Strain | Ddx59         | 67997  | 1    | 136261992 | 136289085 | +    |
| 21943 | 1446327_at   | Strain | None          | None   | 1    | 166224527 | 166225201 | +    |
| 21944 | 1445601_at   | Strain | None          | None   | NONE | NONE      | NONE      | NONE |
| 21945 | 1429707_at   | Strain | Plaa          | 18786  | 4    | 93544242  | 93578250  | -    |
| 21946 | 1439601_at   | Strain | 2700008B19Rik | 217026 | 11   | 83481700  | 83510195  | +    |
| 21947 | 1451977_at   | Strain | Dyrk1a        | 13548  | 16   | 94067810  | 94100573  | +    |
| 21948 | 1438168_x_at | Strain | Ddx39         | 68278  | 8    | 82975115  | 82983264  | +    |

|       |              |        |               |        |      |           |           |      |
|-------|--------------|--------|---------------|--------|------|-----------|-----------|------|
| 21949 | 1435007_s_at | Strain | Al132487      | 104910 | 12   | 104322122 | 104327808 | +    |
| 21950 | 1433839_at   | Strain | Al875199      | 244141 | 7    | 90992627  | 91105853  | +    |
| 21951 | 1448961_at   | Strain | Plscr2        | 18828  | 9    | 92167000  | 92189011  | +    |
| 21952 | 1433413_at   | Strain | Nrxn1         | 18189  | 17   | 87900413  | 88568779  | -    |
| 21953 | 1436770_x_at | Strain | Psma1         | 26440  | 7    | 108067002 | 108132938 | -    |
| 21954 | 1458425_at   | Strain | None          | None   | NONE | NONE      | NONE      | NONE |
| 21955 | 1439738_at   | Strain | 5630401D24Rik | 71449  | 1    | 162443384 | 162458080 | -    |
| 21956 | 1422636_at   | Strain | Dmtf1         | 23857  | 5    | 9125544   | 9168200   | -    |
| 21957 | 1444366_at   | Strain | A130052D22    | 330177 | 5    | 116273764 | 116274460 | +    |
| 21958 | 1459885_s_at | Strain | Cox7c         | 12867  | 13   | 82151364  | 82153299  | -    |
| 21959 | 1416944_a_at | Strain | Tlk2          | 24086  | 11   | 104998272 | 105103265 | +    |
| 21960 | 1424522_at   | Strain | B130016L12Rik | 217995 | 13   | 12434470  | 12477878  | +    |
| 21961 | 1417037_at   | Strain | Orc6l         | 56452  | 8    | 84572565  | 84580844  | +    |
| 21962 | 1446243_at   | Strain | None          | None   | 16   | 97394579  | 97395262  | +    |
| 21963 | 1433684_at   | Strain | ---           | 208092 | 11   | 119726141 | 119740170 | +    |
| 21964 | 1424446_at   | Strain | Armc7         | 276905 | 11   | 115296770 | 115311559 | +    |
| 21965 | 1420230_at   | Strain | AA414993      | 103569 | 11   | 59561235  | 59561500  | +    |
| 21966 | 1450321_at   | Strain | Zfp354c       | 30944  | 11   | 50564207  | 50580572  | -    |
| 21967 | 1448586_at   | Strain | Hspa14        | 50497  | 2    | 3406125   | 3430020   | -    |
| 21968 | 1453435_a_at | Strain | Fmo2          | 55990  | 1    | 162784360 | 162808025 | -    |
| 21969 | 1447465_at   | Strain | None          | None   | 7    | 92750417  | 92750809  | +    |
| 21970 | 1421813_a_at | Strain | Psap          | 19156  | 10   | 60236420  | 60261282  | +    |
| 21971 | 1451468_s_at | Strain | Xpo5          | 72322  | 17   | 43712776  | 43752220  | +    |
| 21972 | 1450892_a_at | Strain | Usp4          | 22258  | 9    | 108417796 | 108462269 | +    |
| 21973 | 1457185_at   | Strain | Zfp114        | 232966 | NONE | NONE      | NONE      | NONE |
| 21974 | 1435451_at   | Strain | MGI:2176740   | 191578 | 5    | 99782804  | 99819230  | -    |
| 21975 | 1451423_at   | Strain | None          | None   | 17   | 44403085  | 44404872  | +    |
| 21976 | 1420755_a_at | Strain | Park2         | 50873  | 17   | 9877473   | 10702789  | +    |
| 21977 | 1450628_at   | Strain | Slc2a8        | 56017  | 2    | 32905150  | 32914234  | -    |
| 21978 | 1444650_at   | Strain | Arhgef18      | 102098 | 8    | 4103      | 13701     | -    |
| 21979 | 1424484_at   | Strain | Mobk1b        | 232157 | 6    | 83670277  | 83687043  | +    |
| 21980 | 1433461_at   | Strain | Sf3b2         | 319322 | 19   | 5062722   | 5084238   | -    |
| 21981 | 1428018_a_at | Strain | Cd300d        | 140497 | 11   | 114817862 | 114822973 | -    |
| 21982 | 1443958_at   | Strain | 9030203C11Rik | 320854 | 10   | 14558036  | 14558896  | -    |
| 21983 | 1456441_at   | Strain | 4931419P11Rik | 399599 | 19   | 4628205   | 4630953   | +    |
| 21984 | 1436288_at   | Strain | 1700049M11Rik | 68221  | 2    | 163655841 | 163657086 | -    |
| 21985 | 1454063_at   | Strain | 4933412E24Rik | 71088  | 15   | 60024704  | 60026451  | -    |
| 21986 | 1451009_at   | Strain | Rnf151        | 67504  | 17   | 22520924  | 22523184  | -    |
| 21987 | 1446512_at   | Strain | 2610312B22Rik | 69082  | 2    | 83342327  | 83362366  | +    |
| 21988 | 1446100_at   | Strain | Trp53bp1      | 27223  | 2    | 120712100 | 120784969 | -    |
| 21989 | 1445708_x_at | Strain | 3110021A11Rik | 67289  | 6    | 120281251 | 120281436 | +    |
| 21990 | 1446209_at   | Strain | Usp40         | 227334 | 1    | 87765405  | 87827652  | -    |
| 21991 | 1454304_at   | Strain | Epn2          | 13855  | 11   | 61242891  | 61305293  | -    |
| 21992 | 1457789_at   | Strain | Cln3          | 12752  | 7    | 120621131 | 120632951 | -    |
| 21993 | 1425522_at   | Strain | 2600011C06Rik | 67039  | 12   | 80506670  | 80547102  | +    |
| 21994 | 1442098_at   | Strain | AU022434      | 106337 | 16   | 8047871   | 8048623   | -    |
| 21995 | 1432218_a_at | Strain | 4632412I24Rik | 74035  | 4    | 150531696 | 150553856 | +    |
| 21996 | 1442840_at   | Strain | D4ErtD669e    | 52379  | 4    | 118419653 | 118420673 | -    |
| 21997 | 1437887_at   | Strain | E130306M17Rik | 320825 | 10   | 9499237   | 9548513   | -    |
| 21998 | 1438332_at   | Strain | Slc22a6       | 18399  | 19   | 7814586   | 7823070   | +    |
| 21999 | 1459760_at   | Strain | Ndufs4        | 17993  | 13   | 110702711 | 110802452 | -    |
|       |              |        | Ccnb1-rs1 /// |        |      |           |           |      |
|       |              |        | LOC231869 /// |        |      |           |           |      |
|       |              |        | Ccnb1 ///     |        |      |           |           |      |
|       |              |        | LOC434175 /// |        |      |           |           |      |
|       |              |        | LOC545021 /// |        |      |           |           |      |
| 22000 | 1449675_at   | Strain | LOC545676     | 12429  | 5    | 142497143 | 142497719 | +    |
| 22001 | 1452115_a_at | Strain | Plk4          | 20873  | 3    | 40219747  | 40236580  | +    |
| 22002 | 1442596_at   | Strain | Klhdc2        | 69554  | 12   | 66128557  | 66142253  | +    |
| 22003 | 1428533_at   | Strain | D1Bwg0212e    | 52846  | 1    | 39832719  | 39843798  | +    |
| 22004 | 1444229_at   | Strain | Nr2f2         | 11819  | 7    | 64237865  | 64245019  | -    |
| 22005 | 1422050_at   | Strain | Nkx1-2        | 20231  | 7    | 126962111 | 126965509 | -    |
| 22006 | 1422243_at   | Strain | Fgf7          | 14178  | 2    | 125548637 | 125604378 | +    |
| 22007 | 1454338_at   | Strain | E130112L15Rik | 77858  | 1    | 162622333 | 162623548 | -    |
| 22008 | 1440609_at   | Strain | Map4k4        | 26921  | 1    | 40195342  | 40319092  | +    |

|       |              |        |               |        |      |           |           |      |
|-------|--------------|--------|---------------|--------|------|-----------|-----------|------|
| 22009 | 1423943_at   | Strain | Dus1l         | 68730  | 11   | 120610295 | 120617488 | -    |
| 22010 | 1437255_at   | Strain | Zbtb7         | 16969  | 10   | 81272657  | 81283255  | +    |
| 22011 | 1441529_at   | Strain | B3gnt1        | 53625  | 11   | 22729537  | 22754478  | -    |
| 22012 | 1455541_a_at | Strain | 4430402l18Rik | 381218 | 19   | 28175661  | 28216751  | -    |
| 22013 | 1444419_at   | Strain | Prcp          | 72461  | 7    | 86915848  | 86974762  | +    |
| 22014 | 1442540_at   | Strain | C77609        | 96961  | 2    | 96165620  | 96166148  | +    |
| 22015 | 1442996_x_at | Strain | None          | None   | NONE | NONE      | NONE      | NONE |
| 22016 | 1419177_at   | Strain | D8Erttd531e   | 52348  | 8    | 39455470  | 39493394  | +    |
| 22017 | 1459612_at   | Strain | Plekhe1       | 98432  | 1    | 106112969 | 106335347 | +    |
| 22018 | 1437748_at   | Strain | Fut11         | 73068  | 14   | 19056280  | 19061509  | +    |
| 22019 | 1427727_x_at | Strain | Psg19         | 26439  | 7    | 15659846  | 15668568  | -    |
| 22020 | 1425918_at   | Strain | Egln3         | 112407 | 12   | 50934400  | 50959266  | -    |
| 22021 | 1435071_at   | Strain | Zfyve1        | 217695 | 12   | 80410951  | 80458920  | -    |
| 22022 | 1424304_at   | Strain | Tpcn2         | 233979 | 7    | 139669045 | 139699049 | -    |
| 22023 | 1448714_at   | Strain | Rngtt         | 24018  | 4    | 33589223  | 33781403  | +    |
| 22024 | 1421308_at   | Strain | Car13         | 71934  | 3    | 14638758  | 14659380  | +    |
| 22025 | 1449847_a_at | Strain | Col4a3bp      | 68018  | 13   | 92734071  | 92828876  | +    |
| 22026 | 1460162_at   | Strain | D8Erttd124e   | 52176  | 8    | 60137958  | 60138855  | +    |
| 22027 | 1438330_at   | Strain | LOC436230     | 436230 | X    | 130339413 | 130348302 | +    |
| 22028 | 1451682_at   | Strain | Zfp142        | 77264  | 1    | 74868909  | 74890473  | -    |
| 22029 | 1448876_at   | Strain | Evc           | 59056  | 5    | 35805685  | 35843373  | -    |
| 22030 | 1442205_at   | Strain | None          | None   | 13   | 99957448  | 99957928  | +    |
| 22031 | 1451725_a_at | Strain | Psmd4         | 19185  | 3    | 94520536  | 94530376  | -    |
| 22032 | 1444387_at   | Strain | Nmt2          | 18108  | 2    | 3201559   | 3243640   | +    |
| 22033 | 1457206_at   | Strain | Zfp521        | 225207 | 18   | 13876625  | 14161173  | -    |
| 22034 | 1433151_at   | Strain | 4933415B22Rik | 71178  | 5    | 111437201 | 111438462 | +    |
| 22035 | 1441402_at   | Strain | Csrp2bp       | 228714 | 2    | 143825971 | 143864569 | +    |
| 22036 | 1429890_at   | Strain | A930007D18Rik | 77789  | 4    | 82457935  | 82459213  | +    |
| 22037 | 1430175_at   | Strain | 4930588G05Rik | 78817  | 10   | 105416530 | 105419021 | -    |
| 22038 | 1439193_at   | Strain | Prrxl1        | 107751 | 14   | 30736662  | 30786328  | +    |
| 22039 | 1437994_x_at | Strain | 2700087H15Rik | 70427  | 10   | 79660963  | 79675809  | -    |
| 22040 | 1427843_at   | Strain | Al840826      | 407243 | 2    | 167099958 | 167170277 | -    |
| 22041 | 1446165_at   | Strain | 4930420O11Rik | 328329 | 13   | 98930827  | 99546711  | -    |
| 22042 | 1447580_at   | Strain | None          | None   | 11   | 97668168  | 97668311  | -    |
| 22043 | 1439344_at   | Strain | Stag1         | 20842  | 9    | 100545170 | 100860091 | +    |
| 22044 | 1421578_at   | Strain | Ccl4          | 20303  | 11   | 83390576  | 83392669  | +    |
| 22045 | 1458339_at   | Strain | Cdadc1        | 71891  | 14   | 54094451  | 54133002  | -    |
| 22046 | 1458103_at   | Strain | Ncor1         | 20185  | 11   | 62043183  | 62164152  | -    |
| 22047 | 1427493_at   | Strain | 2610207F23Rik | 67161  | 3    | 41056512  | 41247364  | -    |
| 22048 | 1431768_a_at | Strain | Hrmt1l3       | 71974  | 7    | 43892468  | 43972375  | +    |
